# Supplementary material for: DNA metabarcoding of mites from small soil samples: limited agreement with morphological identifications but improved results from long-read sequencing
Source: PeerJ. 2025 Oct 20;13:e20205. doi: 10.7717/peerj.20205 (PMC12548636; doi:10.7717/peerj.20205)
Supplement: Supplemental Information 1 [file peerj-13-20205-s001.xlsx]

## Sheet: Table S1
Metazoan_OTU	Mite_OTU	kingdom	kingdom_BootS	phylum	phylum_BootS	class	class_BootS	order	order_BootS	family	family_BootS	genus	genus_BootS	species	species_BootS	b1.1	b1.2	b1.3	b1.4	b1.5	b1.6	b2.1	b2.2	b2.3	b2.4	b2.5	b3.1	b3.2	b3.3	b3.4	b3.5	b3.6	b4.1	b4.2	b4.3	b4.4	b4.5	b4.6	b5.1	b5.2	b5.3	b5.4	b5.5	b5.6	s1.1	s1.2	s1.3	s1.4	s1.5
01ede3fd7428fa54d4de7b3c252335533e320c8c	01ede3fd7428fa54d4de7b3c252335533e320c8c	Metazoa	1	Arthropoda	1	Arachnida	1	Mesostigmata	1	Parasitidae	1	Pergamasus	1	Pergamasus_vagabundus	1	0	0	0	0	0	0	0	0	0	0	0	0	0	0	0	0	0	2	0	0	0	0	0	0	0	0	0	0	0	0	0	15	0	0
1732b338c511886aa7ce7d9f887bd0937e4a8b71	1732b338c511886aa7ce7d9f887bd0937e4a8b71	Metazoa	1	Arthropoda	1	Arachnida	1	Sarcoptiformes	1	Oppiidae	1	Multioppia	1	Multioppia_glabra	1	2	0	0	0	0	0	0	0	0	0	0	0	0	0	0	0	0	0	6	0	0	0	0	0	0	0	0	0	0	0	0	0	0	0
200db2df030df1d736749743bfca9ed696d52136	200db2df030df1d736749743bfca9ed696d52136	Metazoa	1	Arthropoda	1	Arachnida	1	Mesostigmata	1	Parasitidae	1	Pergamasus	1	Pergamasus_vagabundus	1	0	0	0	0	0	0	0	0	0	0	0	0	0	0	0	0	0	0	0	0	0	0	0	0	0	0	0	0	0	2	0	0	0	0
22771107c01bde649edd1a4a019d7d573d174033	22771107c01bde649edd1a4a019d7d573d174033	Metazoa	1	Arthropoda	1	Arachnida	1	Sarcoptiformes	1	Oppiidae	1	Oppiella	1	Oppiella_nova	1	0	0	0	0	0	0	0	0	0	0	0	0	0	0	0	0	0	0	0	0	0	0	0	0	0	0	0	0	0	0	2	0	0	0
2482c7c3cf36c62ad418734c33b1f167280b7ef2	2482c7c3cf36c62ad418734c33b1f167280b7ef2	Metazoa	1	Arthropoda	1	Arachnida	1	Sarcoptiformes	1	Euzetidae	1	Euzetes	1	Euzetes_globulus	1	0	0	0	0	3	0	0	0	0	0	0	0	0	0	0	0	0	0	0	0	0	0	0	3	0	0	0	0	0	0	0	2	0	44
25c52198d0e873b010b6f8aaa6232c827acbf64f	25c52198d0e873b010b6f8aaa6232c827acbf64f	Metazoa	1	Arthropoda	1	Arachnida	1	Sarcoptiformes	1	Nanorchestidae	1	Nanorchestes	1	Nanorchestes_sp._BOLD:AAZ5796	1	0	0	0	0	0	0	0	0	0	0	0	0	0	0	0	0	0	0	0	0	0	21	0	0	0	0	0	0	0	0	0	0	0	0
25c80f98764deacceeefa5336f38890a70bca942	25c80f98764deacceeefa5336f38890a70bca942	Metazoa	1	Arthropoda	1	Arachnida	0.97	Sarcoptiformes	0.96	Suctobelbidae	0.95	Suctobelbella	0.95	Suctobelbella_sp	0.9	0	0	0	0	0	0	0	0	0	0	0	0	0	0	9	0	0	0	0	9	0	0	0	0	0	0	0	0	0	0	0	0	0	0
279fe771c4aac5082dff0dcbfbded17a1c9837df	279fe771c4aac5082dff0dcbfbded17a1c9837df	Metazoa	1	Arthropoda	1	Arachnida	1	Sarcoptiformes	1	Nothridae	1	Nothrus	1	Nothrus_silvestris	1	0	0	0	0	0	0	0	0	0	0	0	0	0	0	0	0	0	0	0	0	0	0	0	0	0	0	0	0	0	0	0	0	0	0
3253c995aef46d092c126b20174560c759b431ba	3253c995aef46d092c126b20174560c759b431ba	Metazoa	1	Arthropoda	1	Arachnida	1	Sarcoptiformes	1	Oppiidae	1	Oppiella	1	Oppiella_nova	1	0	0	0	0	0	0	0	0	0	0	0	0	0	0	0	0	0	0	0	0	0	0	0	0	0	0	0	0	0	0	23	0	0	0
345019f888a505b8bba9988def4ea1a7e0a4f438	345019f888a505b8bba9988def4ea1a7e0a4f438	Metazoa	1	Arthropoda	0.98	Arachnida	0.94	Trombidiformes	0.94	Rhagidiidae	0.94	Rhagidia	0.94	Rhagidia_sp	0.94	0	0	0	0	0	0	0	0	0	0	0	0	0	0	0	0	0	0	0	0	0	0	0	0	0	0	0	0	0	0	0	0	0	0
36e8b465980fc54a437c4538035f8f69f640b450	36e8b465980fc54a437c4538035f8f69f640b450	Metazoa	1	Arthropoda	1	Arachnida	0.98	Sarcoptiformes	0.97	Suctobelbidae	0.97	Suctobelbella	0.97	Suctobelbella_subcornigera	0.97	0	2	0	0	0	0	0	0	0	0	0	26	0	0	0	0	0	0	0	0	0	2	0	0	0	0	0	0	0	2	0	0	0	0
3d8b74f0c91b38f3526a2631fb0a5a504d704d2b	3d8b74f0c91b38f3526a2631fb0a5a504d704d2b	Metazoa	1	Arthropoda	1	Arachnida	1	Sarcoptiformes	1	Tectocepheidae	1	Tectocepheus	1	Tectocepheus_sp	0.85	0	0	0	0	0	0	0	0	0	0	0	0	0	0	0	0	0	0	0	0	0	0	0	0	0	0	0	0	0	0	2	0	0	0
42604bb6d51baf98257845ab2e19e2ab24b8fdd0	42604bb6d51baf98257845ab2e19e2ab24b8fdd0	Metazoa	1	Arthropoda	1	Arachnida	1	Sarcoptiformes	1	Quadroppiidae	1	Quadroppia	1	Quadroppia_quadricarinata	1	0	0	0	0	0	0	0	0	0	0	0	0	10	0	0	0	0	0	0	0	0	0	0	0	0	0	0	0	0	0	0	0	0	0
4523bdf11b15dfe3731decac91d565e146c08f8d	4523bdf11b15dfe3731decac91d565e146c08f8d	Metazoa	1	Arthropoda	1	Arachnida	1	Sarcoptiformes	1	Tectocepheidae	1	Tectocepheus	1	Tectocepheus_sarekensis	1	0	0	0	2	0	0	0	3	0	0	0	0	0	0	0	0	0	0	0	0	0	0	0	0	0	0	0	0	0	8	2	4	0	0
473b4845d08fec2c6d7b53ffbee9d5cf84d190dc	473b4845d08fec2c6d7b53ffbee9d5cf84d190dc	Metazoa	1	Arthropoda	0.99	Arachnida	0.98	Mesostigmata	0.98	Parasitidae	0.98	Pergamasus	0.98	Pergamasus_vagabundus	0.98	0	0	0	0	0	0	0	0	0	0	0	0	0	0	0	0	0	0	0	0	0	0	0	0	0	0	0	0	0	0	0	2	0	2
4b3b8beee1014c0c1233eaf3b591b96bc88886df	4b3b8beee1014c0c1233eaf3b591b96bc88886df	Metazoa	1	Arthropoda	0.98	Arachnida	0.88	Sarcoptiformes	0.85	unclassified_Sarcoptiformes	0.78	unclassified_Sarcoptiformes	0.77	unclassified_Sarcoptiformes_sp	0.64	0	0	0	0	2	0	0	0	0	0	0	0	0	0	0	0	0	0	0	0	0	0	0	0	0	0	0	0	0	0	0	0	0	0
5a3301612ee1ad7762d6042840fe60a07d766825	5a3301612ee1ad7762d6042840fe60a07d766825	Metazoa	0.99	Arthropoda	0.98	Arachnida	0.94	Sarcoptiformes	0.85	Nanorchestidae	0.84	Speleorchestes	0.84	Speleorchestes_sp	0.35	0	0	0	0	0	0	0	0	0	0	0	0	0	0	0	0	0	0	0	0	0	0	0	2	0	0	0	0	0	0	0	0	0	0
5fbec5d47f9db91f0c1a6c7cd0811948b69d5e0e	5fbec5d47f9db91f0c1a6c7cd0811948b69d5e0e	Metazoa	1	Arthropoda	1	Arachnida	1	Trombidiformes	1	Cocceupodidae	1	Linopodes	1	Linopodes_sp._BOLD:ACC1905	1	0	0	0	0	0	8	0	0	0	0	0	0	0	0	0	0	0	0	0	0	0	0	0	0	0	0	0	0	0	5	0	3	0	0
60975997483a28ceb97b21279fb1de45e2357bd8	60975997483a28ceb97b21279fb1de45e2357bd8	Metazoa	1	Arthropoda	1	Arachnida	1	Sarcoptiformes	1	Suctobelbidae	1	Suctobelbella	1	Suctobelbella_sp._BOLD:AAL7920	1	0	0	0	0	0	0	0	0	0	0	0	0	0	0	0	0	0	0	0	0	0	0	0	0	0	0	0	0	0	0	2	0	0	0
680f8458f4a4d1c5bd8199160be30420ed80142f	680f8458f4a4d1c5bd8199160be30420ed80142f	Metazoa	0.96	Arthropoda	0.93	Arachnida	0.92	Sarcoptiformes	0.88	unclassified_Sarcoptiformes	0.15	unclassified_Sarcoptiformes	0.15	unclassified_Sarcoptiformes_sp	0.15	0	0	0	0	0	0	0	0	0	0	0	0	0	0	0	0	0	0	0	0	0	0	0	0	0	0	0	0	0	0	0	0	0	0
6d061f06fa5b43b0b0e256038f42a5e1302808f9	6d061f06fa5b43b0b0e256038f42a5e1302808f9	Metazoa	1	Arthropoda	1	Arachnida	0.99	Sarcoptiformes	0.99	Quadroppiidae	0.97	Quadroppia	0.97	Quadroppia_sp	0.8	0	0	0	0	0	0	0	0	0	0	0	0	0	0	0	0	6	5	0	0	27	6	0	0	0	0	0	0	0	0	0	5	0	0
6edce5e5019e8a079983c902a95bca607cd5cd61	6edce5e5019e8a079983c902a95bca607cd5cd61	Metazoa	1	Arthropoda	1	Arachnida	0.88	Sarcoptiformes	0.88	unclassified_Sarcoptiformes	0.76	unclassified_Sarcoptiformes	0.76	unclassified_Sarcoptiformes_sp	0.24	0	0	0	0	0	0	0	5	0	0	0	0	0	0	0	0	0	0	0	0	0	0	0	0	0	0	0	0	0	0	0	0	0	0
71a5a4e315e8a43cec5282341469cfd0adfcbc7e	71a5a4e315e8a43cec5282341469cfd0adfcbc7e	Metazoa	1	Arthropoda	1	Arachnida	0.98	Sarcoptiformes	0.98	Suctobelbidae	0.95	Suctobelbella	0.95	Suctobelbella_subcornigera	0.95	0	0	0	0	0	0	0	0	0	0	0	0	0	0	0	0	0	0	0	0	0	0	0	0	0	0	0	0	0	0	0	39	0	0
77cde2a2fac96c0cb5007b6874484fbe96e63853	77cde2a2fac96c0cb5007b6874484fbe96e63853	Metazoa	1	Arthropoda	1	Arachnida	1	Mesostigmata	1	Veigaiidae	1	Veigaia	1	Veigaia_nemorensis	1	0	0	0	0	0	0	0	0	0	0	0	0	0	0	0	0	0	2	0	0	0	0	0	0	0	0	0	0	0	0	13	0	0	0
77dc28c46fb08d14ac1bf8e5114e6fb5b0e0809b	77dc28c46fb08d14ac1bf8e5114e6fb5b0e0809b	Metazoa	1	Arthropoda	1	Arachnida	1	Sarcoptiformes	1	Camisiidae	1	Platynothrus	1	Platynothrus_peltifer	1	0	0	0	0	0	0	0	0	0	0	0	0	0	0	0	0	0	0	0	0	0	0	0	0	3	276	0	0	0	0	0	0	0	0
7e283d4740d46cba9e032bcd87ecaebd96bb3393	7e283d4740d46cba9e032bcd87ecaebd96bb3393	Metazoa	1	Arthropoda	0.99	Arachnida	0.99	Sarcoptiformes	0.98	Pyroglyphidae	0.98	Dermatophagoides	0.98	Dermatophagoides_farinae	0.98	3	0	0	0	0	0	0	0	0	0	0	0	0	0	0	0	0	0	0	0	0	0	0	0	0	0	0	0	0	0	0	0	0	0
8249d8fa5ded0416a3b96f430e49b25dc467aef7	8249d8fa5ded0416a3b96f430e49b25dc467aef7	Metazoa	1	Arthropoda	1	Arachnida	1	Mesostigmata	1	Macrochelidae	1	Longicheles	1	Longicheles_sp._n._BOLD:ACY1519	1	0	0	0	0	0	0	0	0	0	0	0	0	0	0	0	0	0	0	0	0	0	0	0	0	0	0	0	0	0	0	0	0	0	0
8a8852955970b3e0077c781d714c9528978162d1	8a8852955970b3e0077c781d714c9528978162d1	Metazoa	1	Arthropoda	1	Arachnida	1	Sarcoptiformes	1	Steganacaridae	1	Atropacarus	1	Atropacarus_csiszarae	1	0	0	0	0	0	0	0	0	0	0	0	0	0	0	0	0	0	0	0	0	0	0	0	0	0	0	0	0	0	0	0	0	0	0
8e8451f31a4eb6514344407c4c7d2e3aacaccd2c	8e8451f31a4eb6514344407c4c7d2e3aacaccd2c	Metazoa	1	Arthropoda	1	Arachnida	1	Mesostigmata	1	Parasitidae	1	Pergamasus	1	Pergamasus_misellus	1	0	0	0	0	0	0	0	0	0	0	0	9	0	0	0	0	0	0	0	0	0	0	0	0	0	0	0	0	0	3	0	0	4	0
8ee7b69d32a8ef6f6f484910be2efe049a460f7a	8ee7b69d32a8ef6f6f484910be2efe049a460f7a	Metazoa	1	Arthropoda	1	Arachnida	1	Sarcoptiformes	1	Oppiidae	1	Oppiella	1	Oppiella_nova	1	0	97	0	0	0	0	0	0	0	0	0	0	0	0	0	0	0	0	0	0	0	0	0	0	0	0	0	0	0	0	21	0	0	0
8efba3957883f2feebf5ea578bb506c4e64321cc	8efba3957883f2feebf5ea578bb506c4e64321cc	Metazoa	0.99	Arthropoda	0.97	Arachnida	0.97	unclassified_Arachnida	0.18	unclassified_Arachnida	0.18	unclassified_Arachnida	0.18	unclassified_Arachnida_sp	0.18	0	0	0	0	0	0	0	0	0	0	0	0	0	0	0	0	0	0	0	0	0	0	0	0	0	0	0	0	4	0	0	0	0	0
9c9b57f2b559a62f432132695ff92f6d99bb7993	9c9b57f2b559a62f432132695ff92f6d99bb7993	Metazoa	0.97	Arthropoda	0.96	Arachnida	0.94	Sarcoptiformes	0.93	Brachychthoniidae	0.93	Liochthonius	0.93	Liochthonius_sp	0.93	0	0	0	0	0	0	0	3	0	0	0	0	0	0	0	0	0	0	0	0	8	13	0	0	0	0	0	0	0	0	0	0	0	0
a0000589a08aa28850f40f4b8a6fa598dc4c10f3	a0000589a08aa28850f40f4b8a6fa598dc4c10f3	Metazoa	1	Arthropoda	1	Arachnida	1	Sarcoptiformes	1	Pyroglyphidae	1	Dermatophagoides	1	Dermatophagoides_farinae	1	0	0	0	0	0	0	0	0	0	0	0	0	0	0	0	0	0	0	0	6	0	0	0	0	0	0	0	0	0	0	0	0	0	0
abf54fc2ace2a0c50efbcdf234466341510e24da	abf54fc2ace2a0c50efbcdf234466341510e24da	Metazoa	1	Arthropoda	1	Arachnida	1	Sarcoptiformes	1	Pyroglyphidae	1	Dermatophagoides	1	Dermatophagoides_farinae	1	0	0	0	0	0	0	0	0	0	0	0	0	0	0	0	0	0	0	0	0	0	0	0	0	0	0	0	0	0	0	0	0	0	0
ac4600ffb818761a3e91e2e933d5035ecac4086c	ac4600ffb818761a3e91e2e933d5035ecac4086c	Metazoa	0.95	Arthropoda	0.95	Arachnida	0.95	Sarcoptiformes	0.95	Pyroglyphidae	0.95	Dermatophagoides	0.95	Dermatophagoides_sp	0.94	0	0	0	0	0	0	0	0	0	0	0	0	0	0	0	0	0	0	0	0	0	0	0	0	0	0	0	0	0	0	0	0	0	0
ad0629d3f9c56f323a5d7fd0a44aba03c5dc2d12	ad0629d3f9c56f323a5d7fd0a44aba03c5dc2d12	Metazoa	1	Arthropoda	1	Arachnida	1	Sarcoptiformes	1	Nothridae	1	Nothrus	1	Nothrus_palustris	1	0	0	0	2	0	0	0	0	0	0	0	0	0	0	0	0	0	0	0	0	0	0	0	0	0	0	0	0	0	0	0	0	0	0
b8c256d45dc6e34b5cab41932a90246c68b61104	b8c256d45dc6e34b5cab41932a90246c68b61104	Metazoa	1	Arthropoda	1	Arachnida	0.91	Sarcoptiformes	0.89	unclassified_Sarcoptiformes	0.61	unclassified_Sarcoptiformes	0.61	unclassified_Sarcoptiformes_sp	0.26	0	0	0	0	0	0	0	0	0	0	0	12	0	0	0	0	0	0	0	0	0	0	0	0	0	0	0	0	0	0	0	0	0	0
b933509c0525b042ec052c79cd1b3c3d11f4d3df	b933509c0525b042ec052c79cd1b3c3d11f4d3df	Metazoa	1	Arthropoda	0.97	Arachnida	0.91	Sarcoptiformes	0.9	unclassified_Sarcoptiformes	0.52	unclassified_Sarcoptiformes	0.41	unclassified_Sarcoptiformes_sp	0.41	0	0	0	0	0	0	0	0	0	0	0	0	0	0	0	0	0	0	0	0	0	2	0	0	0	0	0	0	0	0	0	3	0	0
bc0c6e38d3926f0ab29de2c92c2feab35ff99bc0	bc0c6e38d3926f0ab29de2c92c2feab35ff99bc0	Metazoa	1	Arthropoda	1	Arachnida	1	Sarcoptiformes	0.99	Pyroglyphidae	0.98	Dermatophagoides	0.98	Dermatophagoides_farinae	0.98	0	0	0	0	0	0	0	0	0	0	2	0	0	0	0	0	0	0	0	0	0	0	0	0	0	0	0	0	0	0	0	0	0	0
c4c03c49b63e503472c36da341dcd4963771c5d5	c4c03c49b63e503472c36da341dcd4963771c5d5	Metazoa	1	Arthropoda	1	Arachnida	1	Sarcoptiformes	1	Camisiidae	1	Heminothrus	1	Heminothrus_targionii	1	0	0	0	0	0	0	0	0	0	0	0	0	0	0	0	0	0	10	0	0	0	0	0	0	0	0	0	0	0	0	0	0	0	0
cc295c3526d4923cdd57b490f26cd1789a280b4b	cc295c3526d4923cdd57b490f26cd1789a280b4b	Metazoa	1	Arthropoda	1	Arachnida	0.97	Sarcoptiformes	0.97	Suctobelbidae	0.95	Suctobelbella	0.95	Suctobelbella_sp	0.92	0	0	0	0	0	0	0	3	0	0	0	0	0	0	0	0	0	0	0	5	0	0	7	0	0	0	0	0	0	0	0	0	0	0
cc67c76ad6d87e03f87aa6f43f46195d31cfa042	cc67c76ad6d87e03f87aa6f43f46195d31cfa042	Metazoa	1	Arthropoda	1	Arachnida	0.88	Trombidiformes	0.86	Tarsonemidae	0.86	Steneotarsonemus	0.84	Steneotarsonemus_sp	0.83	0	0	0	0	0	0	0	0	0	0	0	0	0	0	0	0	0	0	0	0	0	0	0	0	0	0	0	0	0	0	0	0	5	0
ce719e1881bdf69a4031be4ee5124fa7ed81e574	ce719e1881bdf69a4031be4ee5124fa7ed81e574	Metazoa	1	Arthropoda	1	Arachnida	1	Sarcoptiformes	1	Pyroglyphidae	1	Dermatophagoides	1	Dermatophagoides_farinae	1	0	0	0	0	0	0	0	0	0	0	0	0	0	0	0	0	0	0	0	0	0	0	0	0	0	0	0	0	0	46	0	22	0	0
ce89b8ab452bfeff929cfbab7e2dce67ada7fa6d	ce89b8ab452bfeff929cfbab7e2dce67ada7fa6d	Metazoa	1	Arthropoda	1	Arachnida	1	Sarcoptiformes	1	Hypochthoniidae	1	Hypochthonius	1	Hypochthonius_rufulus	1	0	0	0	0	0	0	0	0	0	0	0	0	0	63	0	0	0	0	0	11	0	0	0	0	0	0	0	0	0	0	0	0	0	0
d29eed5ae9e2632bdc603b522cb48566bb0e727d	d29eed5ae9e2632bdc603b522cb48566bb0e727d	Metazoa	1	Arthropoda	1	Arachnida	1	Sarcoptiformes	0.99	unclassified_Sarcoptiformes	0.57	unclassified_Sarcoptiformes	0.5	unclassified_Sarcoptiformes_sp	0.05	0	0	0	0	0	0	0	0	0	0	0	0	0	0	0	0	2	0	0	0	0	0	0	0	0	0	0	0	0	0	0	0	0	0
d68578857ebe23fc3ef0d43e2a98113c5af60005	d68578857ebe23fc3ef0d43e2a98113c5af60005	Metazoa	1	Arthropoda	1	Arachnida	0.99	Sarcoptiformes	0.99	Tectocepheidae	0.99	Tectocepheus	0.99	Tectocepheus_sp	0.8	0	0	0	0	0	0	0	0	0	0	0	0	0	0	0	0	0	0	0	0	0	0	0	0	0	0	0	0	0	0	2	0	0	0
d82264fdaa0c7b88bc04d0267324cb2ab215153f	d82264fdaa0c7b88bc04d0267324cb2ab215153f	Metazoa	1	Arthropoda	1	Arachnida	1	Sarcoptiformes	1	Suctobelbidae	1	Suctobelbella	1	Suctobelbella_sp._BOLD:AAL8155	0.99	0	0	0	0	0	0	0	0	0	0	0	0	0	0	0	0	0	0	0	0	0	0	0	0	0	0	0	0	0	0	0	0	0	0
daf29b3b8c07da06fa28a1e25a532fb29000d81d	daf29b3b8c07da06fa28a1e25a532fb29000d81d	Metazoa	1	Arthropoda	1	Arachnida	1	Sarcoptiformes	1	Oppiidae	1	Oppiella	1	Oppiella_nova	1	0	0	0	0	0	0	0	0	0	0	0	0	0	4	0	0	0	0	0	0	0	0	0	0	0	0	0	0	0	0	0	0	0	0
db0c749bd3a5c81b49eb3c1fa92fab23d382319b	db0c749bd3a5c81b49eb3c1fa92fab23d382319b	Metazoa	1	Arthropoda	1	Arachnida	1	Sarcoptiformes	1	Hemileiidae	1	Hemileius	1	Hemileius_initialis	1	0	0	0	0	0	0	0	0	0	0	0	0	0	0	0	0	0	2	0	0	0	0	0	0	0	0	0	0	0	0	4	78	0	0
dcb096a88a6079eaf0e939141ae0400c3b0674d8	dcb096a88a6079eaf0e939141ae0400c3b0674d8	Metazoa	1	Arthropoda	0.87	Arachnida	0.8	unclassified_Arachnida	0.76	unclassified_Arachnida	0.76	unclassified_Arachnida	0.76	unclassified_Arachnida_sp	0.76	0	0	0	0	0	0	0	0	0	2	0	0	0	0	0	0	0	0	0	0	0	0	0	0	0	0	0	0	0	0	0	0	0	0
e06c090961fce2e1d91056da72af91b8fbd50fee	e06c090961fce2e1d91056da72af91b8fbd50fee	Metazoa	0.99	Arthropoda	0.95	Arachnida	0.95	Sarcoptiformes	0.93	Pyroglyphidae	0.9	Dermatophagoides	0.89	Dermatophagoides_sp	0.86	0	0	0	0	0	0	0	0	0	0	0	0	0	0	0	0	0	0	0	0	2	0	0	0	0	0	0	0	0	0	0	0	0	0
e0d9f771cfc9c16616a1e82908f2123e76baba7c	e0d9f771cfc9c16616a1e82908f2123e76baba7c	Metazoa	1	Arthropoda	1	Arachnida	1	Sarcoptiformes	1	Oppiidae	1	Oppiella	1	Oppiella_nova	1	0	0	0	0	0	0	0	0	0	0	0	0	0	0	0	0	0	0	0	0	0	10	0	0	0	0	0	0	0	0	0	0	0	0
e18b7327c83f6cd0dff6f61eec54d9d35a58194d	e18b7327c83f6cd0dff6f61eec54d9d35a58194d	Metazoa	1	Arthropoda	1	Arachnida	0.99	Sarcoptiformes	0.99	Scheloribatidae	0.99	Scheloribates	0.99	Scheloribates_sp	0.94	0	0	0	0	0	0	0	0	0	0	0	0	0	0	0	0	0	0	0	0	0	0	0	0	0	0	0	0	0	0	3	0	0	0
e23461bd245a41bcd0a6dbdcf37a2cfda41457bd	e23461bd245a41bcd0a6dbdcf37a2cfda41457bd	Metazoa	0.97	Arthropoda	0.95	Arachnida	0.92	Sarcoptiformes	0.88	unclassified_Sarcoptiformes	0.48	unclassified_Sarcoptiformes	0.48	unclassified_Sarcoptiformes_sp	0.38	0	0	0	0	0	0	0	17	0	0	0	0	0	0	0	0	0	0	0	0	0	0	0	0	0	0	0	0	0	2	0	4	0	0
e8e78cc119dc263be27bef635124f657ed58e8d6	e8e78cc119dc263be27bef635124f657ed58e8d6	Metazoa	1	Arthropoda	1	Arachnida	1	Sarcoptiformes	1	Camisiidae	1	Heminothrus	1	Heminothrus_targionii	1	0	0	0	0	0	0	0	0	0	0	0	0	31	0	0	11	0	0	0	0	0	0	8	0	0	0	0	0	0	0	0	0	0	0
f3056025b2fc82deeadbdb0a9dc8297c3e387920	f3056025b2fc82deeadbdb0a9dc8297c3e387920	Metazoa	1	Arthropoda	1	Arachnida	1	Mesostigmata	1	Trachytidae	1	Trachytes	1	Trachytes_aegrota	1	0	0	0	0	0	0	0	0	0	0	0	0	0	0	0	0	0	0	0	0	0	0	0	0	0	0	0	0	0	0	0	0	0	0
fa33d5cb06173f626f9da12e12c829fc410f1321	fa33d5cb06173f626f9da12e12c829fc410f1321	Metazoa	0.98	Arthropoda	0.92	Arachnida	0.9	Sarcoptiformes	0.84	unclassified_Sarcoptiformes	0.34	unclassified_Sarcoptiformes	0.11	unclassified_Sarcoptiformes_sp	0.11	0	0	0	0	0	0	0	0	0	0	0	0	0	0	0	0	0	0	0	2	0	0	3	0	0	0	0	27	0	2	0	0	0	0
fb3016b4bad57c00529aa5cc297bb0d258d8b831	fb3016b4bad57c00529aa5cc297bb0d258d8b831	Metazoa	1	Arthropoda	1	Arachnida	1	Sarcoptiformes	1	Eniochthoniidae	1	Eniochthonius	1	Eniochthonius_minutissimus	1	0	0	0	0	0	0	0	0	0	0	0	25	4	0	0	5	0	0	0	0	0	0	0	0	0	0	0	0	0	0	0	0	0	0
fe5d88222fb77b39042da6d0e19df69a226a248e	fe5d88222fb77b39042da6d0e19df69a226a248e	Metazoa	0.94	Arthropoda	0.94	Arachnida	0.94	Sarcoptiformes	0.93	Pyroglyphidae	0.92	Dermatophagoides	0.92	Dermatophagoides_sp	0.92	0	0	0	0	0	0	0	0	0	0	0	0	0	0	0	0	0	0	0	0	0	0	0	0	0	0	0	0	0	0	0	0	0	0
191dca6135e0b93bee7543c786c42f651710dfb9	#N/A	Metazoa	1	Arthropoda	1	Insecta	1	Hemiptera	1	Tingidae	1	Acalypta	1	Acalypta_carinata	1	0	0	0	0	0	0	0	0	0	0	0	0	0	0	0	0	0	0	0	0	0	0	0	0	0	0	0	0	0	0	3	0	0	0
e132d0edd5af81dd520fdb03d7b0ec99fe3a521c	#N/A	Metazoa	1	Arthropoda	1	Insecta	1	Hemiptera	1	Tingidae	1	Acalypta	1	Acalypta_carinata	1	0	0	0	0	0	0	0	0	4	0	0	0	0	0	0	0	0	0	0	0	0	0	0	0	0	0	0	0	0	0	30	0	0	0
d6be165980208929cd0d3c4a7c0cfb28ed86cb3e	#N/A	Metazoa	1	Arthropoda	1	Insecta	1	Hemiptera	1	Tingidae	1	Acalypta	0.98	Acalypta_carinata	0.98	0	0	0	0	0	0	0	0	0	0	0	0	0	0	0	0	0	0	0	0	0	0	0	0	0	0	0	0	0	3	0	0	0	0
874b394fae121b2c85e9f6dda599d303f576ff14	#N/A	Metazoa	1	Arthropoda	1	Insecta	1	Hemiptera	1	Tingidae	1	Acalypta	1	Acalypta_marginata	1	0	0	0	2	0	4	2	0	0	0	0	5	0	0	0	0	3	0	2	0	0	0	0	4	0	0	0	4	6	9	0	5	0	7
6c5c79159de42a4f38aea1b6c93a67db74f8ca42	#N/A	Metazoa	1	Arthropoda	0.95	Insecta	0.94	Hemiptera	0.9	Tingidae	0.88	Acalypta	0.86	Acalypta_sp	0.86	0	0	0	0	0	0	0	0	0	0	0	0	0	0	0	0	0	0	0	0	0	0	0	0	0	0	0	0	0	0	5	0	0	0
766a33c91e10fba011d775884cee557f27e79fd4	#N/A	Metazoa	1	Annelida	1	Clitellata	1	Crassiclitellata	1	Megascolecidae	1	Achaeta	1	Achaeta_iberica	1	0	0	0	3	0	0	0	0	0	0	0	0	0	0	0	0	0	0	0	0	0	0	0	0	0	44	176	2	10	110	0	0	0	0
f13bc31961a6de4080b6bdbe5b7f5734a28a3bda	#N/A	Metazoa	1	Annelida	1	Clitellata	1	Crassiclitellata	1	Megascolecidae	1	Achaeta	1	Achaeta_iberica	1	0	0	0	0	0	0	0	0	0	0	0	0	0	0	0	0	0	0	0	0	0	0	0	0	0	0	0	0	0	0	0	0	0	0
86aaa46e8ddbe095d58513f065b46a86804ec439	#N/A	Metazoa	1	Arthropoda	1	Insecta	1	Coleoptera	1	Elateridae	1	Agriotes	1	Agriotes_lineatus	1	0	0	2	0	0	0	0	0	0	0	0	0	0	0	0	0	0	0	0	0	3	0	0	0	0	64	0	0	0	0	0	0	0	0
04ab6a7870bd12d205734cf9e4a5e59362dc5c87	#N/A	Metazoa	1	Arthropoda	1	Insecta	1	Coleoptera	1	Elateridae	1	Agriotes	1	Agriotes_lineatus	0.99	0	0	0	0	0	0	0	0	0	0	0	0	0	0	0	0	0	0	0	0	0	0	0	6	0	0	0	0	0	0	0	0	0	0
876e43b2ff775b3d12fce4e0862693c1d4c78ac9	#N/A	Metazoa	1	Arthropoda	0.99	Insecta	0.99	Coleoptera	0.97	Elateridae	0.95	Agriotes	0.94	Agriotes_sp	0.45	0	0	0	0	0	0	0	0	0	0	0	0	0	0	0	0	0	0	0	0	0	0	0	0	0	2	0	0	0	0	0	0	0	0
b7e6f4494c002b7fabab19c49b9d193109247579	#N/A	Metazoa	0.9	Arthropoda	0.9	Insecta	0.9	Coleoptera	0.88	Elateridae	0.87	Agriotes	0.87	Agriotes_sp	0.77	0	0	0	0	0	0	0	0	0	0	0	0	0	0	0	0	0	0	0	0	0	0	0	0	0	0	0	0	0	0	0	0	0	0
ff637f734e734227943b1fdcc16d86a05929b06d	#N/A	Metazoa	1	Arthropoda	1	Insecta	1	Lepidoptera	1	Noctuidae	1	Agrotis	1	Agrotis_exclamationis	1	0	0	0	0	0	0	0	0	0	0	0	0	0	0	0	0	0	0	0	0	0	0	0	0	0	0	0	0	0	0	0	0	0	0
eab4f5629706ae8714daca92a90c3f92bd8e6c74	#N/A	Metazoa	1	Arthropoda	1	Collembola	1	Symphypleona	1	Sminthuridae	1	Allacma	1	Allacma_fusca	1	0	0	0	0	0	0	27	0	0	0	0	2	0	0	0	0	0	0	0	0	0	0	0	0	0	0	0	0	0	0	0	0	0	0
2942441d8663055c93d656cb7191b61ffbfaffd3	#N/A	Metazoa	1	Annelida	1	Clitellata	1	Crassiclitellata	1	Lumbricidae	1	Allolobophora	1	Allolobophora_chlorotica	1	0	0	0	0	0	0	0	0	0	0	0	0	0	0	0	0	0	0	0	0	0	0	0	0	0	0	3	0	0	0	0	0	0	0
ad7182ab8f6cfff12f88367717d2db10d99ebac9	#N/A	Metazoa	1	Arthropoda	1	Insecta	1	Hemiptera	1	Cicadellidae	1	Anoscopus	1	Anoscopus_albiger	1	0	0	0	0	0	0	0	0	0	0	0	0	0	0	0	0	0	0	0	3	0	0	0	0	0	0	0	0	0	0	0	3	0	0
c7a729954212b61ab7c05b4503c301a3971fe54f	#N/A	Metazoa	1	Arthropoda	1	Insecta	1	Hemiptera	1	Cicadellidae	1	Anoscopus	1	Anoscopus_flavostriatus	1	0	0	0	0	0	0	0	0	0	0	0	0	0	0	0	0	0	0	0	0	0	0	0	0	0	0	0	0	0	0	0	0	0	0
4af2ec7154c09fb9d759a6aec2bc516393108cf8	#N/A	Metazoa	1	Arthropoda	1	Insecta	1	Hymenoptera	1	Dryinidae	1	Anteon	1	Anteon_gaullei	1	0	0	6	0	0	0	0	0	0	0	0	0	0	0	0	0	0	0	0	0	0	0	0	0	0	0	0	0	0	0	0	0	0	0
1692f47401e77ca31defb1bff3d28e0038e01bcf	#N/A	Metazoa	1	Arthropoda	1	Insecta	1	Hymenoptera	0.98	Dryinidae	0.98	Anteon	0.98	Anteon_sp	0.47	0	0	0	0	0	0	0	0	0	0	0	0	0	0	0	0	0	0	0	0	0	0	0	0	0	0	0	0	0	0	0	8	0	0
c31513391e3077c78deab4223fca1958b8dfba1a	#N/A	Metazoa	1	Annelida	1	Clitellata	1	Crassiclitellata	1	Lumbricidae	1	Aporrectodea	1	Aporrectodea_caliginosa_L3	1	0	0	0	0	3	0	0	0	0	0	0	0	0	0	0	0	0	0	0	0	0	0	0	7	9	0	0	0	0	19	0	0	0	0
039b847f410382e9f3249d8700042b8b834e0479	#N/A	Metazoa	1	Annelida	1	Clitellata	1	Crassiclitellata	1	Lumbricidae	1	Aporrectodea	1	Aporrectodea_longa	1	0	0	0	0	0	0	0	0	0	0	0	0	0	0	0	0	0	0	0	0	0	0	0	0	0	0	0	0	0	14	0	0	0	0
0e8910279e63c0dc06f2f3dbce2f56831cf58afe	#N/A	Metazoa	1	Annelida	1	Clitellata	1	Crassiclitellata	1	Lumbricidae	1	Aporrectodea	1	Aporrectodea_longa	1	0	0	0	0	106	0	0	0	0	0	0	0	0	0	0	0	0	0	0	0	0	0	0	0	0	0	0	0	0	90	0	0	0	308
22a5609d56d119a9edc0db08038451ba814c6467	#N/A	Metazoa	1	Annelida	1	Clitellata	1	Crassiclitellata	1	Lumbricidae	1	Aporrectodea	1	Aporrectodea_longa	1	0	0	0	0	0	0	0	0	0	0	0	0	0	0	0	0	0	0	0	0	0	0	0	0	0	0	0	0	0	0	0	0	0	0
2605a45367ae872a7f2dbbdbddd4e12b60e17df2	#N/A	Metazoa	1	Annelida	1	Clitellata	1	Crassiclitellata	1	Lumbricidae	1	Aporrectodea	1	Aporrectodea_longa	1	0	0	0	0	0	0	0	0	0	0	0	0	0	0	0	0	0	0	0	0	0	0	0	0	0	0	0	0	0	1484362	0	0	0	0
29cc3e69d4fad3535ef2df93ee8825b2eb34fbac	#N/A	Metazoa	1	Annelida	1	Clitellata	1	Crassiclitellata	1	Lumbricidae	1	Aporrectodea	1	Aporrectodea_longa	1	0	0	0	0	0	0	0	0	0	0	0	0	0	0	0	0	0	0	0	0	0	0	0	0	0	0	0	0	0	9	0	0	0	0
2c965b61b6bc3685e520966d5f43dedd304400d4	#N/A	Metazoa	1	Annelida	1	Clitellata	1	Crassiclitellata	1	Lumbricidae	1	Aporrectodea	1	Aporrectodea_longa	1	0	0	0	0	0	0	0	0	0	0	0	0	0	0	0	0	0	0	0	0	0	0	0	0	0	0	0	0	0	6	0	0	0	0
4b0b3f3b34b378ca7c2236a26d0c8517dfe3be3e	#N/A	Metazoa	1	Annelida	1	Clitellata	1	Crassiclitellata	1	Lumbricidae	1	Aporrectodea	1	Aporrectodea_longa	1	0	0	0	0	0	0	0	0	0	0	0	0	0	0	0	0	0	0	0	0	0	0	0	0	0	0	0	0	0	11	0	0	0	0
53273495b4f3d1dfe412669c752b2d6abcb24cf8	#N/A	Metazoa	1	Annelida	1	Clitellata	1	Crassiclitellata	1	Lumbricidae	1	Aporrectodea	1	Aporrectodea_longa	1	0	0	0	0	0	0	0	0	0	0	0	0	0	0	0	0	0	0	0	0	0	0	0	0	0	0	0	0	0	37	0	0	0	0
863aed041abbcc70e1ff790185d81188c22e524e	#N/A	Metazoa	1	Annelida	1	Clitellata	1	Crassiclitellata	1	Lumbricidae	1	Aporrectodea	1	Aporrectodea_longa	1	0	0	0	0	0	0	0	0	0	0	0	0	0	0	0	0	0	0	0	0	0	0	0	0	0	0	0	0	0	34	0	0	0	0
8ab76e6d8ea5a447db85d0b042d40365c6174c69	#N/A	Metazoa	1	Annelida	1	Clitellata	1	Crassiclitellata	1	Lumbricidae	1	Aporrectodea	1	Aporrectodea_longa	1	0	0	0	0	0	0	0	0	0	0	0	0	0	0	0	0	0	0	0	0	0	0	0	0	0	0	0	0	0	7	0	0	0	0
cfc144d7d2ac2da561048c2e576f4542435adec0	#N/A	Metazoa	1	Annelida	1	Clitellata	1	Crassiclitellata	1	Lumbricidae	1	Aporrectodea	1	Aporrectodea_longa	1	0	0	0	0	0	0	0	0	0	0	0	0	0	0	0	0	0	0	0	0	0	0	0	0	0	0	0	0	0	25	0	0	0	0
da4bc2c87b1138d4f472767f5f9b70b5d07348fc	#N/A	Metazoa	1	Annelida	1	Clitellata	1	Crassiclitellata	1	Lumbricidae	1	Aporrectodea	1	Aporrectodea_longa	1	0	0	0	0	0	0	0	0	0	0	0	0	0	0	0	0	0	0	0	0	0	0	0	0	0	0	0	0	0	6	0	0	0	0
eb173ef6dab70b5fcca5b085f3f8c4e323381f3a	#N/A	Metazoa	1	Annelida	1	Clitellata	1	Crassiclitellata	1	Lumbricidae	1	Aporrectodea	1	Aporrectodea_longa	1	0	0	0	0	0	0	0	0	0	0	0	0	0	0	0	0	0	0	0	0	0	0	0	0	0	0	0	0	0	10	0	0	0	0
fc3ca78577842b0dcfad0160d6fd5a3a9ec2f20c	#N/A	Metazoa	1	Annelida	1	Clitellata	1	Crassiclitellata	1	Lumbricidae	1	Aporrectodea	1	Aporrectodea_longa	1	0	0	0	0	0	0	0	0	0	0	0	0	0	0	0	0	0	0	0	0	0	0	0	0	0	0	0	0	0	28	0	0	0	0
925b36314135c33a77eada7604462dcb5e0100bc	#N/A	Metazoa	1	Annelida	0.99	Clitellata	0.99	Crassiclitellata	0.99	Lumbricidae	0.99	Aporrectodea	0.99	Aporrectodea_longa	0.99	0	0	0	0	0	0	0	0	0	0	0	0	0	0	0	0	0	0	0	0	0	0	0	0	0	0	0	0	0	8	0	0	0	0
ffbe48e95b072e7f6de376e7e25295cf7187b07c	#N/A	Metazoa	1	Annelida	0.99	Clitellata	0.99	Crassiclitellata	0.99	Lumbricidae	0.99	Aporrectodea	0.99	Aporrectodea_longa	0.99	0	0	0	0	0	0	4	0	0	0	0	0	0	0	0	0	0	0	0	0	0	0	0	0	0	0	0	0	0	0	0	0	0	0
4b64f4f1c714efbaf979190d3afd464469326cc3	#N/A	Metazoa	1	Annelida	0.99	Clitellata	0.99	Crassiclitellata	0.99	Lumbricidae	0.98	Aporrectodea	0.98	Aporrectodea_longa	0.98	0	0	0	0	0	0	0	0	0	0	0	0	0	0	0	0	0	0	0	0	0	0	0	0	0	0	0	0	0	10	0	0	0	0
5ace84366ef9914d33ce94d2e521fcb541022826	#N/A	Metazoa	1	Annelida	0.98	Clitellata	0.98	Crassiclitellata	0.98	Lumbricidae	0.98	Aporrectodea	0.98	Aporrectodea_longa	0.98	0	0	0	0	0	0	0	0	0	0	0	0	0	0	0	0	0	0	0	0	0	0	0	0	0	0	0	0	0	7	0	0	0	0
b8309d0d05d986733cd2157c1302cb682744230e	#N/A	Metazoa	1	Annelida	0.99	Clitellata	0.99	Crassiclitellata	0.99	Lumbricidae	0.99	Aporrectodea	0.98	Aporrectodea_longa	0.98	0	0	0	0	0	0	0	0	0	0	0	0	0	0	0	0	0	0	0	0	0	0	0	0	0	0	0	0	0	13	0	0	0	0
245d14a28ebb5a53852e3c3e635aa928514081fb	#N/A	Metazoa	1	Annelida	0.99	Clitellata	0.99	Crassiclitellata	0.98	Lumbricidae	0.97	Aporrectodea	0.96	Aporrectodea_longa	0.96	0	0	0	0	0	0	0	0	0	0	0	0	0	0	0	0	0	0	0	0	0	0	0	0	0	0	0	0	0	3	0	0	0	0
568d545e60fe0b15640d86d8f8dff6bbceb0bf01	#N/A	Metazoa	0.99	Annelida	0.97	Clitellata	0.96	Crassiclitellata	0.96	Lumbricidae	0.96	Aporrectodea	0.96	Aporrectodea_longa	0.96	0	0	0	0	0	0	0	0	0	0	0	0	0	0	0	0	0	0	0	0	0	0	0	0	0	0	0	0	0	7	0	0	0	0
add523d10d2698eff66b930d073b5230397e3e4d	#N/A	Metazoa	1	Annelida	0.96	Clitellata	0.96	Crassiclitellata	0.96	Lumbricidae	0.96	Aporrectodea	0.96	Aporrectodea_longa	0.96	0	0	0	0	0	0	0	0	0	0	0	0	0	0	0	0	0	0	0	0	0	0	0	0	0	0	0	0	0	0	0	2	0	0
3be4b12d601e8d02d1d82fdf9f4663b1bcaaa5a1	#N/A	Metazoa	1	Annelida	1	Clitellata	1	Crassiclitellata	1	Lumbricidae	1	Aporrectodea	1	Aporrectodea_rosea	1	0	0	0	0	0	0	0	0	0	0	0	0	0	0	0	0	0	0	0	0	0	0	0	0	0	0	0	0	0	0	0	0	0	0
5405287e3aca23c16243ba82c6cfe1a79c4bd9c9	#N/A	Metazoa	1	Annelida	1	Clitellata	1	Crassiclitellata	1	Lumbricidae	1	Aporrectodea	1	Aporrectodea_rosea	1	0	0	0	0	4	0	0	0	2	210	41	3	0	2	3	0	0	0	0	0	4	0	0	2	0	0	3	5	0	13	0	0	0	0
8638e2a30cacfb77effa1de098be09cea654df0f	#N/A	Metazoa	1	Annelida	1	Clitellata	1	Crassiclitellata	1	Lumbricidae	1	Aporrectodea	1	Aporrectodea_rosea	1	0	0	0	0	46	0	0	0	0	523	0	0	0	0	0	0	0	0	0	0	0	0	0	0	0	115	0	0	0	168	0	0	0	0
89f1d1bb0650702215b31a24260fc268f6df06ee	#N/A	Metazoa	1	Annelida	1	Clitellata	1	Crassiclitellata	1	Lumbricidae	1	Aporrectodea	1	Aporrectodea_rosea	1	0	0	0	0	0	0	0	0	0	0	0	0	0	0	0	0	0	0	0	0	0	0	0	0	0	0	0	0	0	0	2	0	0	0
95264d8ef4fee62acd3c14bcccf74e2f9ab8e820	#N/A	Metazoa	1	Annelida	1	Clitellata	1	Crassiclitellata	1	Lumbricidae	1	Aporrectodea	1	Aporrectodea_rosea	1	0	0	0	4	0	0	0	0	0	0	0	0	0	0	0	0	0	0	0	0	0	0	0	0	0	0	0	0	0	0	0	0	0	0
c71d803cc21e899a760a22eca62fc5b6dc06c0c4	#N/A	Metazoa	1	Annelida	1	Clitellata	1	Crassiclitellata	1	Lumbricidae	1	Aporrectodea	1	Aporrectodea_rosea	1	0	0	0	0	0	0	6	0	0	10	40	0	0	0	0	0	0	0	0	0	0	0	0	0	0	0	0	0	0	0	0	0	0	0
3a5e6ccfbe037437bbe358ed7da1d20c8f72022f	#N/A	Metazoa	1	Annelida	0.99	Clitellata	0.99	Crassiclitellata	0.99	Lumbricidae	0.99	Aporrectodea	0.99	Aporrectodea_rosea	0.99	0	0	0	0	0	0	0	0	0	0	0	0	0	0	0	0	0	0	0	0	0	0	0	0	0	0	0	0	0	0	0	0	0	0
abacd75c47761a1d2fa03338f63091873e513b0a	#N/A	Metazoa	1	Annelida	1	Clitellata	0.99	Crassiclitellata	0.99	Lumbricidae	0.99	Aporrectodea	0.99	Aporrectodea_rosea	0.99	0	0	0	0	0	0	0	0	0	0	0	0	0	0	0	0	0	0	0	0	0	0	0	0	0	0	0	0	0	0	3	0	0	0
6ff889a4d40b781aa7137a6bf169332119d44648	#N/A	Metazoa	1	Annelida	0.97	Clitellata	0.97	Crassiclitellata	0.96	Lumbricidae	0.96	Aporrectodea	0.95	Aporrectodea_rosea	0.95	0	0	0	0	0	0	0	0	0	0	0	0	0	0	0	0	0	0	0	0	0	0	0	0	0	0	0	0	0	2	0	0	0	0
afa8d28284cc3fb4188bbb8db5e2214d05c5ebc4	#N/A	Metazoa	1	Annelida	0.96	Clitellata	0.96	Crassiclitellata	0.95	Lumbricidae	0.95	Aporrectodea	0.95	Aporrectodea_rosea	0.95	0	0	0	0	0	0	0	0	0	0	0	0	0	0	0	0	0	0	0	0	2	0	0	0	0	0	0	0	0	0	0	0	0	0
8e88d3cc129db2dc92df86b0f08f3b79dcbcfa91	#N/A	Metazoa	1	Annelida	0.95	Clitellata	0.93	Crassiclitellata	0.93	Lumbricidae	0.93	Aporrectodea	0.93	Aporrectodea_sp	0.93	0	0	0	0	0	0	0	0	0	0	0	0	0	0	0	0	0	0	0	0	0	0	0	0	0	0	0	0	0	7	0	0	0	0
295ce60520de1577255199d371aadb6d5204ceb2	#N/A	Metazoa	1	Annelida	0.93	Clitellata	0.92	Crassiclitellata	0.92	Lumbricidae	0.92	Aporrectodea	0.92	Aporrectodea_sp	0.92	0	0	0	0	0	0	0	0	0	0	0	0	0	0	0	0	0	0	0	0	0	0	0	0	0	0	0	0	0	8	0	0	0	0
96abfda4c4fb8ea473d9ef24800e27cebf426b20	#N/A	Metazoa	1	Annelida	0.94	Clitellata	0.93	Crassiclitellata	0.93	Lumbricidae	0.92	Aporrectodea	0.92	Aporrectodea_sp	0.92	0	0	0	0	0	0	0	0	0	0	0	0	0	0	0	0	0	0	0	0	0	0	0	0	0	0	0	0	0	5	0	0	0	0
17a41ebc93d711bcac973bebd5b030d9281d8aa7	#N/A	Metazoa	1	Annelida	0.96	Clitellata	0.93	Crassiclitellata	0.93	Lumbricidae	0.93	Aporrectodea	0.9	Aporrectodea_sp	0.9	0	0	0	0	0	0	0	0	0	0	0	0	0	0	0	0	0	0	0	0	0	0	0	0	0	0	0	0	0	7	0	0	0	0
3947be3b4f1869cfc503b0ad6ac15f76bf91bb10	#N/A	Metazoa	0.94	Annelida	0.91	Clitellata	0.89	Crassiclitellata	0.89	Lumbricidae	0.89	Aporrectodea	0.89	Aporrectodea_sp	0.89	0	0	0	0	0	0	0	0	0	0	0	0	0	0	0	0	0	0	0	0	0	0	0	0	0	0	0	0	0	11	0	0	0	0
16e1279e750ba595d1e42c5c0f1980a0dfd10b3b	#N/A	Metazoa	1	Annelida	0.89	Clitellata	0.89	Crassiclitellata	0.88	Lumbricidae	0.88	Aporrectodea	0.88	Aporrectodea_sp	0.88	0	0	0	0	0	0	0	0	0	0	0	0	0	0	0	0	0	0	0	0	0	0	0	0	0	0	0	0	0	0	0	0	0	0
e00ce8bd93342249ecbfd354ac21c9c6f31166ef	#N/A	Metazoa	1	Annelida	0.97	Clitellata	0.94	Crassiclitellata	0.88	Lumbricidae	0.88	Aporrectodea	0.87	Aporrectodea_sp	0.86	0	0	0	0	0	0	0	0	0	0	0	0	0	0	0	0	0	0	0	0	0	0	0	0	0	0	0	0	0	0	4	0	0	0
86e64aa331450dc5ca02ed8fffafdc19800862fc	#N/A	Metazoa	1	Annelida	0.91	Clitellata	0.89	Crassiclitellata	0.89	Lumbricidae	0.89	Aporrectodea	0.86	Aporrectodea_sp	0.86	0	0	0	0	0	0	0	0	0	0	0	0	0	0	0	0	0	0	0	0	0	0	0	0	0	0	0	0	0	2	0	0	0	0
fd45f0586db26ec8446c2a88cb14c35f964f890f	#N/A	Metazoa	1	Annelida	0.97	Clitellata	0.95	Crassiclitellata	0.92	Lumbricidae	0.9	Aporrectodea	0.86	Aporrectodea_sp	0.86	0	0	0	0	0	0	0	0	0	0	0	0	0	0	0	0	0	0	0	0	0	0	0	0	0	0	0	0	0	2	0	0	0	0
669b8eeb0296058a98c51c7afb22dd6d6b9b84b0	#N/A	Metazoa	1	Annelida	0.88	Clitellata	0.87	Crassiclitellata	0.86	Lumbricidae	0.86	Aporrectodea	0.85	Aporrectodea_sp	0.85	0	0	0	0	0	0	0	0	0	0	0	0	0	0	0	0	2	0	0	0	0	0	0	0	0	0	0	0	0	0	0	0	0	0
10a5732ee9a7e3b4f90e83b2f58302e59823baf8	#N/A	Metazoa	1	Annelida	0.92	Clitellata	0.9	Crassiclitellata	0.87	Lumbricidae	0.85	Aporrectodea	0.83	Aporrectodea_sp	0.83	0	0	0	0	0	0	0	0	0	0	0	0	0	0	0	0	0	0	0	0	0	0	0	0	0	0	0	0	0	6	0	0	0	0
1631914bdaa6fa24f869cd1d3d663a6d5ef23ef7	#N/A	Metazoa	0.99	Annelida	0.9	Clitellata	0.87	Crassiclitellata	0.85	Lumbricidae	0.83	Aporrectodea	0.81	Aporrectodea_sp	0.81	0	0	0	0	0	0	0	0	0	0	0	0	0	0	0	0	0	0	0	0	0	0	0	0	0	0	0	0	0	2	0	0	0	0
63a5ef7e49e3dab1941395eebb28bf9f3bb24915	#N/A	Metazoa	1	Annelida	1	Clitellata	1	Crassiclitellata	1	Lumbricidae	1	Aporrectodea	1	Aporrectodea_tuberculata	1	0	0	0	0	0	0	0	0	0	0	0	0	0	0	0	0	0	0	0	0	2	0	0	0	0	0	0	0	0	0	0	0	0	0
c7655613cf43cc368bb388822f36ff3005a4948d	#N/A	Metazoa	1	Mollusca	1	Gastropoda	1	Stylommatophora	1	Arionidae	1	Arion	1	Arion_circumscriptus	1	0	0	0	0	0	0	0	0	0	0	0	0	0	0	0	0	0	0	0	0	0	0	0	0	0	0	0	0	0	0	2	0	0	0
de354a4cc4500a7119e87364326f7d54d8dc255c	#N/A	Metazoa	1	Arthropoda	1	Insecta	1	Coleoptera	1	Dermestidae	1	Attagenus	1	Attagenus_smirnovi	1	0	0	0	0	0	0	0	0	0	0	0	0	0	0	0	0	0	0	0	0	0	0	0	0	0	0	0	0	0	0	0	0	0	0
d0b6fff1e9a0c31ebc94fbc33e69fa5eccc83f51	#N/A	Metazoa	1	Arthropoda	1	Insecta	1	Coleoptera	1	Carabidae	1	Badister	1	Badister_lacertosus	1	0	0	0	0	0	0	0	2	0	0	0	0	0	0	0	0	0	0	0	0	0	0	0	0	0	0	0	0	0	0	0	0	0	0
a29ff02d8a4ec7eba695156af9cf91c41ba1f7bf	#N/A	Metazoa	1	Arthropoda	1	Insecta	1	Coleoptera	1	Curculionidae	1	Barypeithes	1	Barypeithes_pellucidus	1	0	0	3	17	278	0	0	0	0	0	23	2	2	0	0	0	0	0	0	2	0	0	0	0	0	2	0	0	0	3	3	5	0	65
d1376c9c9a205bdf834899a6117be03308c5b2d5	#N/A	Metazoa	1	Arthropoda	1	Insecta	1	Coleoptera	1	Curculionidae	1	Barypeithes	1	Barypeithes_pellucidus	1	0	3	0	92	20	4	3	3	0	0	0	0	0	2	0	0	5	7	0	0	3	3	0	3	0	0	3	0	3	4	0	5	5	5
85a2ba9bbfb5eb10361e4c27a01c45369df1103d	#N/A	Metazoa	1	Arthropoda	1	Insecta	1	Diptera	1	Bibionidae	1	Bibio	1	Bibio_clavipes	1	7	0	0	7	0	0	19	9	0	0	0	0	0	0	0	0	7	0	0	7	0	0	6	6	0	0	0	7	0	0	18	29	11	9
284079752c039d28dae39a4136624cd84f199a91	#N/A	Metazoa	1	Arthropoda	1	Insecta	1	Diptera	0.99	Bibionidae	0.99	Bibio	0.99	Bibio_clavipes	0.99	0	0	0	0	0	0	0	0	0	0	0	0	0	0	0	0	0	2	0	0	0	0	0	0	0	0	0	0	0	0	0	0	0	0
9ee70d3d9c3e7182a0f30ea8c5db4a863552eb60	#N/A	Metazoa	1	Arthropoda	1	Insecta	1	Diptera	0.99	Bibionidae	0.99	Bibio	0.99	Bibio_clavipes	0.99	0	0	0	0	2	0	0	0	0	0	0	0	0	0	0	0	0	0	0	0	0	0	0	0	0	0	0	0	0	0	0	0	0	0
ff61ee22f7e8ca7e4b6d8045b2065f66d131feab	#N/A	Metazoa	1	Arthropoda	1	Insecta	1	Diptera	0.98	Bibionidae	0.96	Bibio	0.96	Bibio_clavipes	0.96	0	0	0	0	0	0	0	0	0	0	0	0	0	0	0	0	0	0	0	0	0	0	0	0	0	0	0	0	0	0	0	0	0	0
e65736eb3c0de13f1f47f57523d93cb1ba2655c7	#N/A	Metazoa	1	Annelida	1	Clitellata	1	Crassiclitellata	1	Lumbricidae	1	Bimastos	1	Bimastos_rubidus	1	0	0	0	0	0	0	0	0	0	0	0	0	0	0	0	0	0	0	0	0	0	0	0	0	0	0	0	0	0	0	0	0	0	0
896798a5fe2051278268316f13bd6bab8a9252b9	#N/A	Metazoa	1	Arthropoda	1	Insecta	1	Diptera	1	Sciaridae	1	Bradysia	1	Bradysia_nitidicollis	1	0	0	0	0	0	2	0	0	0	3	0	0	0	0	0	0	0	3	0	0	0	0	0	29	0	0	346	2	0	15	0	0	2	0
f79fda3f0d5b1e7965316ed1512bf6b69e1e495a	#N/A	Metazoa	1	Arthropoda	0.98	Insecta	0.95	Diptera	0.93	Sciaridae	0.91	Bradysia	0.91	Bradysia_sp	0.89	0	0	0	0	0	0	0	0	0	0	0	0	0	0	0	0	0	0	0	0	0	0	0	0	0	0	2	0	0	0	0	0	0	0
d02e3a066ca82a73b137a475ee6a775900c6093b	#N/A	Metazoa	1	Arthropoda	1	Insecta	1	Diptera	0.96	Sciaridae	0.91	Bradysia	0.83	Bradysia_sp	0.82	0	0	0	0	0	0	0	0	0	0	0	0	0	0	0	0	0	0	0	0	0	0	0	0	0	0	0	0	0	0	0	0	0	0
857f742f567297246b866af10b9d77df29859540	#N/A	Metazoa	1	Arthropoda	1	Insecta	1	Diptera	1	Sciaridae	1	Bradysia	1	Bradysia_trivittata	1	0	0	0	0	0	0	0	0	0	0	0	0	3	0	0	0	0	0	0	0	0	0	0	0	0	5	0	15	0	0	0	4	0	0
70922cd57a557273f6345d1361ff64162e70a62f	#N/A	Metazoa	1	Arthropoda	0.99	Insecta	0.98	Diptera	0.94	Chironomidae	0.91	Bryophaenocladius	0.91	Bryophaenocladius_sp	0.91	0	0	0	0	0	0	0	0	0	0	0	0	0	0	0	0	0	0	0	0	0	0	0	0	0	0	0	0	0	0	3	0	0	0
2719f65eab27ff0b7ea66704db734276a081ddf8	#N/A	Metazoa	1	Arthropoda	1	Insecta	1	Diptera	1	Chironomidae	1	Bryophaenocladius	1	Bryophaenocladius_xanthogyne	1	0	0	0	0	0	0	0	0	0	0	0	0	0	0	0	57	0	0	0	0	0	0	0	0	0	0	0	0	0	0	0	0	0	0
56f5ca39d53c5169a5548a8c09d2c7db1b00b092	#N/A	Metazoa	1	Annelida	1	Clitellata	1	Enchytraeida	1	Enchytraeidae	1	Buchholzia_segmented_worms	1	Buchholzia_appendiculata	1	0	0	0	0	0	0	0	0	0	0	0	0	0	0	0	0	0	0	0	0	0	0	0	0	0	0	0	0	0	0	0	0	0	0
5bd6ab58de645abd36f374005cac790b98844539	#N/A	Metazoa	1	Annelida	1	Clitellata	1	Enchytraeida	1	Enchytraeidae	1	Buchholzia_segmented_worms	1	Buchholzia_appendiculata	1	0	0	0	19	0	0	0	0	0	0	17	0	0	15	163	0	1588	167	305	0	33	0	0	0	0	0	0	30	0	385	0	0	18	12
a0959818ec62f604b2e7491e436e186509058278	#N/A	Metazoa	1	Annelida	1	Clitellata	1	Enchytraeida	1	Enchytraeidae	1	Buchholzia_segmented_worms	1	Buchholzia_appendiculata	1	0	0	0	0	0	0	0	0	0	0	0	0	0	0	0	3	0	0	0	0	0	0	0	0	0	0	0	0	0	0	0	0	0	0
eacb84e44d4cd31c8986cbe70fd23c156e1d4f2a	#N/A	Metazoa	1	Annelida	1	Clitellata	1	Enchytraeida	1	Enchytraeidae	1	Buchholzia_segmented_worms	1	Buchholzia_appendiculata	1	0	0	0	0	0	0	0	0	0	0	0	0	0	9	0	34	538	922	33	0	0	0	0	0	7	0	0	18	5	297	0	0	0	0
26652a4f58460e146b091acf0a49fdccf5fb1908	#N/A	Metazoa	1	Annelida	0.92	Clitellata	0.92	Enchytraeida	0.89	Enchytraeidae	0.89	Buchholzia_segmented_worms	0.87	Buchholzia_segmented_worms_sp	0.87	0	0	0	0	0	0	0	0	0	0	0	0	0	0	0	0	2	0	0	0	0	0	0	0	0	0	0	0	0	0	0	0	0	0
e3eaa14c91294f262f772e03b8c5821167803869	#N/A	Metazoa	1	Annelida	0.98	Clitellata	0.97	Enchytraeida	0.86	Enchytraeidae	0.86	Buchholzia_segmented_worms	0.86	Buchholzia_segmented_worms_sp	0.86	0	0	0	0	0	0	0	0	0	0	0	0	0	0	0	0	0	0	0	0	0	0	0	0	0	0	0	0	0	14	0	0	0	0
178cc87822fc8438f1b59f03b0710080a9cfded9	#N/A	Metazoa	1	Mollusca	1	Gastropoda	1	Ellobiida	1	Ellobiidae	1	Carychium	1	Carychium_tridentatum	1	0	0	0	0	0	0	0	0	0	0	0	0	0	0	0	0	0	0	0	0	0	0	0	0	0	0	0	0	0	0	0	0	0	43
e10b628e9794b173f0369e6f0e738600ca3b9553	#N/A	Metazoa	1	Mollusca	1	Gastropoda	1	Ellobiida	1	Ellobiidae	1	Carychium	1	Carychium_tridentatum	1	0	0	0	0	0	0	0	0	0	0	0	0	0	0	0	0	0	0	0	0	0	0	0	0	0	0	0	0	0	0	0	0	0	0
961affdc254ec58897b1271e35c83cf9de20c40d	#N/A	Metazoa	1	Mollusca	1	Gastropoda	1	Stylommatophora	1	Helicidae	1	Cepaea	1	Cepaea_hortensis	1	0	0	0	0	0	0	0	0	0	0	0	0	0	0	0	0	0	0	0	0	0	0	0	0	0	0	0	0	0	0	0	0	0	0
3d855bca334460648ef606bdaa7f3d70949a24a7	#N/A	Metazoa	1	Arthropoda	1	Collembola	1	Poduromorpha	1	Hypogastruridae	1	Ceratophysella	1	Ceratophysella_denticulata	1	0	0	0	0	0	0	0	0	0	0	0	0	0	0	0	0	0	0	0	0	0	0	0	40	0	0	0	461	0	5	0	0	0	3
ec553db0394b0e1e68a684aba6ea24d18a8b0638	#N/A	Metazoa	1	Arthropoda	0.99	Collembola	0.97	Poduromorpha	0.94	Hypogastruridae	0.93	Ceratophysella	0.91	Ceratophysella_sp	0.61	0	0	0	0	0	0	0	0	0	0	0	0	0	0	0	0	0	0	0	0	0	0	0	0	0	0	0	0	0	2	0	0	0	0
f158eb1aa1ad342595761b88a3dc2e7852748899	#N/A	Metazoa	1	Annelida	1	Clitellata	1	Enchytraeida	1	Enchytraeidae	1	Chamaedrilus	1	Chamaedrilus_sphagnetorum	1	0	0	0	0	0	0	0	0	0	0	0	0	0	0	0	0	0	0	2	0	0	0	16	0	0	0	0	0	0	0	0	0	0	0
c1b1b6b533a014aaa76268e57e59ba6d5dc0ee4c	#N/A	Metazoa	1	Arthropoda	0.95	Insecta	0.95	Hemiptera	0.94	Cicadellidae	0.94	Chlorita	0.94	Chlorita_sp	0.94	0	0	0	0	0	0	0	0	0	0	0	0	0	0	0	0	0	0	0	0	0	0	0	0	0	0	0	0	0	0	0	0	0	0
f1cdfaa7ed3bb408334261732dc545947f65be4b	#N/A	Metazoa	0.95	Arthropoda	0.95	Insecta	0.94	Hemiptera	0.94	Cicadellidae	0.94	Chlorita	0.94	Chlorita_sp	0.94	0	0	0	0	0	0	0	0	0	0	0	0	0	0	0	0	0	0	0	0	0	3	0	0	0	0	0	0	0	0	0	0	0	0
033ef57d32a62b4ac8871bf6baded70a5b2d0b2c	#N/A	Metazoa	1	Arthropoda	1	Insecta	1	Lepidoptera	1	Crambidae	1	Chrysoteuchia	1	Chrysoteuchia_culmella	1	0	0	0	0	0	0	0	0	0	0	0	0	0	0	0	0	0	0	0	0	0	0	0	0	0	0	0	0	0	6	3	0	0	0
2ee72a7f856824f3c4114b7139f5f99ba006b9d7	#N/A	Metazoa	1	Mollusca	1	Gastropoda	1	Stylommatophora	1	Cochlicopidae	1	Cochlicopa	1	Cochlicopa_lubrica	1	0	0	0	0	0	0	0	0	0	0	0	0	0	0	0	0	0	0	0	0	0	0	0	0	0	0	0	4	0	0	2	0	0	0
11349cb78ac44e294f534db17e860f9f08d77adf	#N/A	Metazoa	1	Annelida	1	Clitellata	1	Enchytraeida	1	Enchytraeidae	1	Cognettia	1	Cognettia_chlorophila	1	0	0	0	0	0	0	0	0	0	0	0	0	0	0	0	0	0	0	0	0	0	0	0	0	0	0	0	0	0	0	0	0	0	0
97eb11c0f5ee58815193b4b759fada810d741feb	#N/A	Metazoa	1	Annelida	1	Clitellata	1	Enchytraeida	1	Enchytraeidae	1	Cognettia	1	Cognettia_chlorophila	1	0	0	0	0	0	0	0	0	0	0	0	428	0	109	0	0	13	24	19	0	0	0	360	0	0	0	0	21	0	1360	13	0	0	27
b4e5d14731a491fe97b3ca08f29af49cc810c34c	#N/A	Metazoa	1	Annelida	1	Clitellata	1	Enchytraeida	1	Enchytraeidae	1	Cognettia	1	Cognettia_chlorophila	1	0	0	0	0	0	0	0	0	0	0	0	0	0	0	0	0	0	0	0	4	0	0	0	0	0	0	0	0	0	0	0	0	0	0
e6bf0da42af1dc2848ff366e2be68a8c3c373419	#N/A	Metazoa	1	Annelida	1	Clitellata	1	Enchytraeida	1	Enchytraeidae	1	Cognettia	1	Cognettia_chlorophila	1	0	0	0	0	0	0	0	0	0	0	0	0	0	0	0	0	0	0	0	0	0	0	0	0	0	0	0	2	0	0	0	0	0	0
f69c24b5296c9bf0acbdfd3216887d65de29fc35	#N/A	Metazoa	1	Annelida	1	Clitellata	1	Enchytraeida	0.99	Enchytraeidae	0.99	Cognettia	0.99	Cognettia_chlorophila	0.99	0	0	0	0	0	0	0	0	0	0	0	0	0	0	0	0	0	0	0	0	0	0	8	0	0	0	0	0	0	0	0	0	0	0
7beaa0fc6eec43ee5078fedcae51a0665e71e8e7	#N/A	Metazoa	1	Mollusca	1	Gastropoda	0.9	Stylommatophora	0.9	Truncatellinidae	0.9	Columella	0.9	Columella_sp	0.88	0	0	0	0	0	0	0	0	0	0	0	0	0	0	0	0	0	6	0	0	0	0	0	0	0	0	0	0	0	0	0	0	0	0
53db946900f1712836a86bcdc008d6a0427a45c0	#N/A	Metazoa	1	Arthropoda	1	Insecta	1	Diptera	1	Sciaridae	1	Corynoptera	1	Corynoptera_hypopygialis	1	0	0	0	0	0	0	0	0	0	0	0	0	0	0	0	0	0	0	0	0	0	9	0	0	0	0	0	0	0	0	0	0	0	0
c75c80ecb4e5d2be02f8e47a7cb457c8699424ef	#N/A	Metazoa	1	Arthropoda	1	Insecta	1	Diptera	1	Sciaridae	1	Corynoptera	1	Corynoptera_subdentata	1	0	0	0	0	0	0	0	0	0	0	0	0	0	0	0	0	0	0	0	0	0	0	0	0	0	0	0	0	0	0	0	0	0	0
972225ef84d7190c29bf2faeabe639c327ccea98	#N/A	Metazoa	1	Arthropoda	1	Insecta	1	Diptera	1	Sciaridae	1	Corynoptera	1	Corynoptera_subparvula	1	0	0	0	0	0	0	0	0	0	0	0	0	0	17	0	0	0	0	0	0	0	0	0	0	0	0	0	0	0	0	0	0	0	0
2f23b1ab47251d1a3ded6cfd42818e87d4bec946	#N/A	Metazoa	1	Arthropoda	1	Insecta	1	Diptera	1	Sciaridae	1	Cratyna	1	Cratyna_vagabunda	1	0	6	0	0	0	0	0	0	0	0	0	0	0	0	0	0	0	0	0	0	0	0	0	0	0	0	0	0	0	0	36	0	0	0
0ddfe5a5a57291558357540708b3e1642630208e	#N/A	Metazoa	1	Arthropoda	1	Diplopoda	1	Julida	1	Julidae	1	Cylindroiulus	1	Cylindroiulus_caeruleocinctus	1	0	301	0	0	0	0	0	0	0	0	0	0	0	0	0	0	0	0	0	0	0	0	0	0	0	0	0	0	0	0	929	0	0	0
af6f287438294e886e9948f2c0ac60fe834b159e	#N/A	Metazoa	1	Arthropoda	1	Insecta	1	Coleoptera	1	Byrrhidae	1	Cytilus	1	Cytilus_sp	0.7	0	0	0	0	0	0	0	0	0	0	0	0	0	0	0	0	0	0	0	0	0	0	0	0	0	0	0	0	0	0	2	0	0	0
74068c2ec46aff45abc3dff7559121d2521c85b4	#N/A	Metazoa	1	Arthropoda	1	Insecta	1	Coleoptera	1	Elateridae	1	Dalopius	1	Dalopius_marginatus	1	3	0	0	0	2	0	0	0	0	0	0	0	0	2	0	0	0	0	0	0	0	0	0	0	0	0	0	0	0	2	4	4	9	16
7f8a2867d812dd7136fef45d2d52b395f42a944c	#N/A	Metazoa	1	Arthropoda	0.97	Insecta	0.96	Coleoptera	0.85	Elateridae	0.81	Dalopius	0.8	Dalopius_sp	0.74	0	0	0	0	0	0	0	0	0	0	0	0	0	0	0	0	0	0	0	0	0	0	0	0	0	0	0	3	0	0	0	0	0	0
037032c67857b4d5929609b4fb5e65a685bfa4a9	#N/A	Metazoa	1	Arthropoda	1	Collembola	1	Entomobryomorpha	1	Isotomidae	1	Desoria	1	Desoria_germanica	0.97	0	0	0	0	0	0	0	0	0	0	0	0	0	0	0	0	0	0	0	0	0	0	0	0	0	0	0	0	0	0	0	0	0	0
52693e3d4167059c770a93b96a9846eb0dda30ff	#N/A	Metazoa	1	Arthropoda	0.99	Collembola	0.97	Entomobryomorpha	0.97	Isotomidae	0.97	Desoria	0.97	Desoria_sp	0.72	0	0	0	0	0	0	0	5	0	0	0	0	0	0	0	0	0	0	0	0	0	0	0	0	0	0	0	0	0	0	0	0	0	0
de9db1804deb0410b3acf41988a334aecf564f91	#N/A	Metazoa	1	Arthropoda	1	Arachnida	1	Araneae	1	Linyphiidae	1	Dicymbium	1	Dicymbium_nigrum	1	0	0	0	0	0	0	0	0	0	0	0	0	0	0	0	0	0	9	0	0	2	0	0	0	0	0	0	0	0	0	0	0	0	0
051a9f8ca0a98ba1be4cd193db15e794856a79da	#N/A	Metazoa	1	Tardigrada	1	Eutardigrada	1	Parachela_tardigrades	1	Hypsibiidae	1	Diphascon	1	Diphascon_higginsi	1	0	0	0	0	0	0	0	0	0	0	0	0	0	0	0	0	0	0	0	0	0	0	0	0	3	0	0	0	0	0	0	0	0	0
ca17fb4e5f36d73055b75801164e333f9f90eb94	#N/A	Metazoa	1	Arthropoda	1	Insecta	1	Psocoptera	1	Psyllipsocidae	1	Dorypteryx	1	Dorypteryx_domestica	1	0	0	0	0	0	0	0	0	0	0	0	0	0	0	0	0	0	0	0	0	0	0	0	0	0	0	0	0	0	0	0	0	0	0
08f75bb0aa72275913e887cc9d2ffbc8ddd3be9a	#N/A	Metazoa	1	Arthropoda	1	Insecta	1	Hemiptera	1	Rhyparochromidae	1	Drymus	1	Drymus_ryeii	1	0	0	0	0	0	0	0	0	0	0	0	0	0	0	0	0	0	0	0	0	0	10	0	0	0	0	0	0	0	0	0	0	14	59
4358dfa39c716e0a30776133443c767c2163f93c	#N/A	Metazoa	1	Arthropoda	1	Insecta	1	Hemiptera	1	Rhyparochromidae	1	Drymus	1	Drymus_ryeii	1	0	0	0	0	0	0	0	0	0	0	0	0	0	0	0	0	0	0	0	0	0	0	0	0	0	0	0	0	0	0	0	0	0	2
9eaaa196cce52d0c5ad5746bd3faeefb3c5b671a	#N/A	Metazoa	1	Arthropoda	1	Insecta	1	Diptera	1	Anthomyiidae	0.99	Egle	0.91	Egle_sp	0.55	0	0	0	0	0	0	0	0	0	0	0	0	0	0	0	2	0	0	0	0	0	0	0	0	0	0	0	0	0	0	0	0	0	0
021a959a7ad3d5f66bb2980f27d2debb13ceb83c	#N/A	Metazoa	1	Annelida	1	Clitellata	1	Enchytraeida	1	Enchytraeidae	1	Enchytraeus	0.99	Enchytraeus_buchholzi	0.99	0	0	0	2	0	0	0	0	0	0	0	0	0	0	0	0	0	0	0	0	0	0	0	0	0	0	0	0	0	0	0	0	0	0
428ae8fb33311c376a8e5db5e3ae8251958bccdf	#N/A	Metazoa	1	Annelida	1	Clitellata	1	Enchytraeida	1	Enchytraeidae	1	Enchytraeus	1	Enchytraeus_lacteus	1	0	0	0	0	0	0	0	0	0	0	0	0	0	0	0	0	0	0	0	0	0	0	2	0	0	0	0	0	0	0	76	0	0	0
0324b8541c268c8c4a1942f380dfd8bc20eec6a9	#N/A	Metazoa	1	Annelida	1	Clitellata	1	Enchytraeida	0.99	Enchytraeidae	0.99	Enchytraeus	0.99	Enchytraeus_lacteus	0.99	0	7	0	0	0	0	0	0	0	0	0	0	0	0	0	0	0	0	0	0	0	0	0	0	0	0	0	0	0	0	0	0	0	0
f91d14cfed06c2aeef136459b7ee4030bf769509	#N/A	Metazoa	1	Annelida	1	Clitellata	1	Enchytraeida	0.99	Enchytraeidae	0.99	Enchytraeus	0.99	Enchytraeus_lacteus	0.99	0	0	0	0	0	0	0	0	0	0	0	0	0	0	0	0	0	0	0	0	0	0	0	0	0	2	0	0	0	0	0	0	0	0
2ec4e872f288abbc28393a1960b49c88f475de2f	#N/A	Metazoa	1	Annelida	1	Clitellata	1	Enchytraeida	1	Enchytraeidae	1	Enchytraeus	1	Enchytraeus_sp	0.55	0	0	3	0	0	0	0	0	0	0	0	0	0	0	0	0	5	0	0	0	0	0	0	0	0	0	0	0	0	0	0	8	0	0
71fcafe4cc0d3cd16ea8867252fd319862ff2062	#N/A	Metazoa	1	Annelida	1	Clitellata	1	Enchytraeida	1	Enchytraeidae	1	Enchytraeus	1	Enchytraeus_sp	0.48	0	0	0	0	0	0	0	0	0	0	0	0	0	0	0	0	0	0	0	0	0	0	0	0	0	0	0	0	0	0	0	0	0	0
2a8639ebca94f4001b45e55b9c94a2fa48a15fff	#N/A	Metazoa	1	Annelida	1	Clitellata	1	Enchytraeida	1	Enchytraeidae	1	Enchytronia	1	Enchytronia_parva	1	20	2	17	3	0	19	0	0	0	0	2	0	12	6	0	0	17	7	33	6	0	0	0	0	0	0	0	3	2	21	232	7	225	18
93ede9fd79e21cb479588e96dde25bc73b3c0882	#N/A	Metazoa	1	Annelida	1	Clitellata	1	Enchytraeida	1	Enchytraeidae	1	Enchytronia	1	Enchytronia_parva	1	0	0	0	0	0	0	0	0	0	0	0	0	0	0	0	0	0	0	0	0	0	0	0	0	0	0	0	0	0	0	5	0	0	0
a757b2aa2ffd6ef4ff5955e9897ce959ec6f3d80	#N/A	Metazoa	1	Arthropoda	0.99	Collembola	0.98	Entomobryomorpha	0.98	Entomobryidae	0.98	Entomobrya	0.98	Entomobrya_sp._BOLD:AAA7244	0.98	0	0	0	0	0	0	0	0	0	0	0	0	0	0	0	0	0	0	0	0	0	0	0	0	0	0	0	0	0	0	0	0	0	0
4eb035cfe6cadf60f449a8debf7a6a66e24f2390	#N/A	Metazoa	1	Arthropoda	1	Insecta	1	Lepidoptera	1	Eriocraniidae	1	Eriocrania	1	Eriocrania_semipurpurella	1	0	0	0	0	0	10	0	0	0	0	0	0	0	0	0	0	0	0	0	0	0	0	0	0	0	0	0	0	0	0	0	0	2	0
33299f94761a6b004a79e6da5a7027effb396810	#N/A	Metazoa	1	Arthropoda	1	Arachnida	1	Sarcoptiformes	1	Euzetidae	1	Euzetes	1	Euzetes_globulus	1	0	0	0	0	0	0	0	0	0	0	0	0	0	0	0	0	0	0	0	0	0	0	0	0	0	0	0	0	0	0	0	0	0	0
c7a54ae309b3b5a4d9ec622ee439c1980739826e	#N/A	Metazoa	1	Arthropoda	1	Insecta	1	Coleoptera	1	Curculionidae	1	Exomias	1	Exomias_trichopterus	1	0	0	0	0	0	0	0	0	0	0	0	0	0	0	0	0	0	3	0	0	0	0	0	0	0	0	0	0	0	0	0	0	0	0
8a8246771fde31e37a526ed356cba95e3a5c6be4	#N/A	Metazoa	1	Arthropoda	1	Collembola	1	Entomobryomorpha	1	Isotomidae	1	Folsomia	1	Folsomia_fimetaria	1	0	0	0	0	0	0	0	0	0	0	0	0	0	0	0	0	0	0	0	0	0	0	0	0	0	0	0	0	0	0	0	0	0	0
4365641d8f62d5adc989d61dc473711a9f2dc431	#N/A	Metazoa	1	Arthropoda	1	Collembola	1	Entomobryomorpha	1	Isotomidae	1	Folsomia	1	Folsomia_quadrioculata	1	0	0	0	0	0	0	0	0	0	0	0	0	0	0	4	0	4	0	0	0	44	8	2	2	0	0	0	0	0	0	0	0	0	0
8548a77b9b41c3f8ef88eccce2aa22da39eb1a31	#N/A	Metazoa	1	Arthropoda	1	Collembola	1	Entomobryomorpha	1	Isotomidae	1	Folsomia	1	Folsomia_quadrioculata	1	0	0	0	0	0	0	0	0	0	0	0	0	0	0	0	0	14	0	0	0	0	0	0	0	0	0	0	0	0	0	0	0	0	0
7dcdc4af37a7294bd74adc624c36fabd6c0f5470	#N/A	Metazoa	1	Arthropoda	0.98	Collembola	0.87	Entomobryomorpha	0.87	Isotomidae	0.87	Folsomia	0.87	Folsomia_sp	0.87	0	0	0	0	0	0	0	0	0	0	0	0	0	0	0	0	0	0	0	0	0	0	0	0	0	0	0	0	0	0	0	0	0	0
e8c3457392ecf8b21eb3e57fd468ef2c6498391f	#N/A	Metazoa	1	Arthropoda	0.99	Collembola	0.88	Entomobryomorpha	0.87	Isotomidae	0.85	Folsomia	0.83	Folsomia_sp	0.82	0	0	0	0	0	0	0	0	0	0	0	0	0	0	0	0	0	100	0	0	0	0	0	4	0	0	0	0	0	0	0	0	0	0
5939b72f09346aad8d0ee89841a9ab27478c4e27	#N/A	Metazoa	1	Annelida	1	Clitellata	1	Enchytraeida	1	Enchytraeidae	1	Fridericia_segmented_worms	1	Fridericia_bulboides	1	0	0	0	0	0	0	0	0	0	0	0	0	0	0	0	0	0	0	0	0	0	0	0	0	0	0	0	0	0	0	0	0	2	0
70e8b459cf95439979d63a2289feb545a8295c5d	#N/A	Metazoa	1	Annelida	1	Clitellata	1	Enchytraeida	1	Enchytraeidae	1	Fridericia_segmented_worms	1	Fridericia_bulboides	1	19	0	0	96	0	0	0	0	0	0	0	0	0	0	0	0	9	3	0	0	0	0	0	0	5	0	0	0	3	19	0	0	0	0
a37519cf6d2cf2160e027a495d3e8bccd525599a	#N/A	Metazoa	1	Annelida	1	Clitellata	1	Enchytraeida	1	Enchytraeidae	1	Fridericia_segmented_worms	1	Fridericia_bulboides	1	0	8	22	0	0	0	0	0	0	0	0	0	0	0	0	0	0	0	0	3	0	0	0	0	0	0	22	0	0	42	0	0	84	0
f4a03020b29efedd36d02982940963d3bff7ea98	#N/A	Metazoa	1	Annelida	1	Clitellata	1	Enchytraeida	1	Enchytraeidae	1	Fridericia_segmented_worms	1	Fridericia_bulboides	1	0	0	0	21	0	0	0	0	0	0	0	0	0	0	0	0	0	0	0	0	0	0	0	0	0	0	0	0	0	0	0	0	0	0
d678bd1d01be28dade51a48ef6ea47121894a172	#N/A	Metazoa	1	Annelida	1	Clitellata	1	Enchytraeida	1	Enchytraeidae	1	Fridericia_segmented_worms	1	Fridericia_christeri	0.99	0	0	0	6	0	0	0	6	0	0	4	0	0	0	3	0	16	8	5	0	6	0	0	0	0	0	3	0	8	13	0	3	7	4
07393a531044c5f0f077cff66a4fe6009c8130c9	#N/A	Metazoa	1	Annelida	1	Clitellata	1	Enchytraeida	1	Enchytraeidae	1	Fridericia_segmented_worms	1	Fridericia_connata	1	0	0	0	0	0	0	0	0	0	0	0	0	0	0	0	0	0	0	0	0	0	0	0	0	0	0	0	0	0	0	0	0	0	0
2eee0666834d5e664fdf5bfb4d68c1bb30208d6b	#N/A	Metazoa	1	Annelida	1	Clitellata	1	Enchytraeida	1	Enchytraeidae	1	Fridericia_segmented_worms	1	Fridericia_connata	1	0	0	0	0	0	0	0	0	0	0	0	0	0	0	0	0	0	0	0	0	0	0	0	0	0	0	0	0	0	0	0	0	0	0
4382f4271263288bb8a7fc73e140974714a8f9e3	#N/A	Metazoa	1	Annelida	1	Clitellata	1	Enchytraeida	1	Enchytraeidae	1	Fridericia_segmented_worms	1	Fridericia_connata	1	0	0	0	0	0	0	0	0	0	0	0	0	0	0	0	0	0	0	0	0	0	0	0	0	0	0	0	0	0	0	0	0	0	0
4db577791fddc8dc7939381f7be2213b039256da	#N/A	Metazoa	1	Annelida	1	Clitellata	1	Enchytraeida	1	Enchytraeidae	1	Fridericia_segmented_worms	1	Fridericia_connata	1	0	0	0	0	0	0	0	0	0	0	0	0	0	0	0	0	0	0	0	0	0	0	0	0	0	0	0	0	0	0	0	0	0	0
5b430f09c3c335fa9b6214a307663b8b3d322cbe	#N/A	Metazoa	1	Annelida	1	Clitellata	1	Enchytraeida	1	Enchytraeidae	1	Fridericia_segmented_worms	1	Fridericia_connata	1	0	0	0	0	0	0	0	0	0	0	0	0	0	0	0	0	0	0	0	0	0	0	0	0	0	0	0	0	0	0	0	0	0	0
5bc113d4be5727b93d2c928980bc495c4dfc689d	#N/A	Metazoa	1	Annelida	1	Clitellata	1	Enchytraeida	1	Enchytraeidae	1	Fridericia_segmented_worms	1	Fridericia_connata	1	0	0	0	0	0	0	0	0	0	0	0	0	0	0	0	0	0	0	0	0	0	0	0	0	0	0	0	0	0	0	0	0	0	0
71545c3caa7bc4bf8a1fdec049913a01607a934a	#N/A	Metazoa	1	Annelida	1	Clitellata	1	Enchytraeida	1	Enchytraeidae	1	Fridericia_segmented_worms	1	Fridericia_connata	1	0	0	0	0	0	0	0	0	0	0	0	0	0	0	0	0	0	0	0	0	0	0	0	0	0	0	0	0	0	0	0	0	0	0
721e6130f3b4e3f6b98d02e6da10d0637a5efda2	#N/A	Metazoa	1	Annelida	1	Clitellata	1	Enchytraeida	1	Enchytraeidae	1	Fridericia_segmented_worms	1	Fridericia_connata	1	0	0	0	0	0	0	0	0	0	0	0	0	0	0	0	0	0	0	0	0	0	0	0	0	0	0	0	0	0	0	0	0	0	0
aea567f00ee79f177ecf5b05d9f12aa0b044ea82	#N/A	Metazoa	1	Annelida	1	Clitellata	1	Enchytraeida	1	Enchytraeidae	1	Fridericia_segmented_worms	1	Fridericia_connata	1	0	0	0	573	146	0	0	429	0	0	325	0	0	0	0	0	94	0	125	0	0	0	0	0	0	0	0	121	0	507	118	0	284	237
cc32be40a2b98cd7203d1228a477d786f5b310c9	#N/A	Metazoa	1	Annelida	1	Clitellata	1	Enchytraeida	1	Enchytraeidae	1	Fridericia_segmented_worms	1	Fridericia_connata	1	0	0	0	0	0	0	0	0	0	0	0	0	0	0	0	0	0	0	0	0	0	0	0	0	0	0	0	0	0	0	0	0	0	0
e9583b14a904d5490d7e942cc4881c09cd7b261c	#N/A	Metazoa	1	Annelida	1	Clitellata	1	Enchytraeida	1	Enchytraeidae	1	Fridericia_segmented_worms	1	Fridericia_connata	1	0	0	0	0	0	0	0	0	0	0	0	0	0	0	0	0	0	0	0	0	0	0	0	0	0	0	0	0	0	0	0	0	0	0
d8a995af8d62ac50e656d5e75ce7c4c245d8fdee	#N/A	Metazoa	1	Annelida	0.98	Clitellata	0.98	Enchytraeida	0.98	Enchytraeidae	0.98	Fridericia_segmented_worms	0.98	Fridericia_connata	0.98	0	0	0	10	0	0	0	0	0	0	0	0	0	0	0	0	0	0	0	0	0	0	0	0	0	0	0	0	0	0	0	0	0	0
84f4e618d4960692fa727fe4be6b5d464a521376	#N/A	Metazoa	1	Annelida	1	Clitellata	1	Enchytraeida	1	Enchytraeidae	1	Fridericia_segmented_worms	1	Fridericia_paroniana	1	0	0	0	0	0	0	0	0	0	0	0	0	0	0	2	0	0	0	0	0	0	3	0	0	6	62	7	117	48	101	0	0	2	0
aff9d8db06d5ee66788742480f5f4e3583bc78ea	#N/A	Metazoa	1	Annelida	1	Clitellata	1	Enchytraeida	1	Enchytraeidae	1	Fridericia_segmented_worms	1	Fridericia_paroniana	0.98	0	0	0	0	0	0	0	0	0	0	0	0	0	0	0	0	0	0	0	0	0	0	0	0	0	2	0	0	0	0	0	0	0	0
4ce4c2ccf146edd5679fd536e058792be24b14d1	#N/A	Metazoa	1	Annelida	1	Clitellata	1	Enchytraeida	1	Enchytraeidae	1	Fridericia_segmented_worms	1	Fridericia_perrieri	1	0	0	0	0	0	0	0	0	0	0	0	0	0	0	0	0	0	0	0	0	0	0	0	0	0	0	0	0	0	6	0	0	0	0
d974c21706810cc86721880c89c3c9416ad396ba	#N/A	Metazoa	1	Annelida	1	Clitellata	1	Enchytraeida	1	Enchytraeidae	1	Fridericia_segmented_worms	1	Fridericia_ratzeli	0.96	0	0	0	0	0	0	0	0	0	0	0	0	0	0	0	0	0	0	0	0	0	0	0	0	0	0	0	0	0	0	7	0	0	0
0e024cb46b236a049eb20dae612f353dd45a71fe	#N/A	Metazoa	1	Annelida	1	Clitellata	1	Enchytraeida	1	Enchytraeidae	1	Fridericia_segmented_worms	1	Fridericia_segmented_worms_sp	0.93	0	0	0	0	0	0	0	0	0	0	0	0	0	0	0	0	0	0	0	0	0	0	0	0	0	0	0	0	0	0	0	0	0	0
74998e7b3055fadd30bb307c45e6bc00dc0b2260	#N/A	Metazoa	1	Annelida	1	Clitellata	1	Enchytraeida	1	Enchytraeidae	1	Fridericia_segmented_worms	1	Fridericia_segmented_worms_sp	0.46	0	0	0	0	0	0	0	0	0	0	0	0	0	0	0	0	0	0	0	0	0	0	0	0	14	0	0	0	0	0	0	0	0	0
8f43f58a7f0db29d42654856d857c70de028d98d	#N/A	Metazoa	1	Annelida	1	Clitellata	1	Enchytraeida	0.99	Enchytraeidae	0.99	Fridericia_segmented_worms	0.99	Fridericia_segmented_worms_sp	0.6	0	0	11	0	0	0	0	0	0	0	0	0	0	0	0	0	0	0	0	0	0	0	0	0	0	0	0	0	0	0	0	0	0	0
3c8ad64ae7b09a7c28d1551511008f17a5891e25	#N/A	Metazoa	1	Annelida	0.99	Clitellata	0.98	Enchytraeida	0.98	Enchytraeidae	0.98	Fridericia_segmented_worms	0.96	Fridericia_segmented_worms_sp	0.94	0	0	0	0	0	0	0	0	0	0	0	0	0	0	0	0	0	0	0	0	0	0	0	0	0	0	0	0	0	13	0	0	0	0
d0049467ee488aafdc5c5a71d03a946433697383	#N/A	Metazoa	1	Annelida	0.97	Clitellata	0.97	Enchytraeida	0.96	Enchytraeidae	0.96	Fridericia_segmented_worms	0.96	Fridericia_segmented_worms_sp	0.9	0	0	0	0	4	0	0	3	0	2	0	2	0	0	8	0	10	7	0	0	2	0	0	3	0	0	0	17	629	7	4	14	3	3
d5b97466a7201055abc836c230993246bf521399	#N/A	Metazoa	0.99	Annelida	0.96	Clitellata	0.96	Enchytraeida	0.96	Enchytraeidae	0.96	Fridericia_segmented_worms	0.95	Fridericia_segmented_worms_sp	0.94	0	0	0	0	0	0	0	0	0	0	0	0	0	0	0	0	0	0	0	0	0	0	0	0	0	0	0	0	0	0	0	3	0	0
03f79f234e7c070a2cb8353b1ec9da73c06658e0	#N/A	Metazoa	1	Annelida	0.99	Clitellata	0.99	Enchytraeida	0.99	Enchytraeidae	0.99	Fridericia_segmented_worms	0.94	Fridericia_segmented_worms_sp	0.93	0	0	0	0	0	0	0	0	0	0	0	0	0	0	0	0	0	0	0	0	0	0	0	0	0	0	0	0	0	0	0	0	0	0
b8a522eac0a2a284377a1230870c89f4db82c5ad	#N/A	Metazoa	1	Annelida	0.98	Clitellata	0.98	Enchytraeida	0.95	Enchytraeidae	0.95	Fridericia_segmented_worms	0.93	Fridericia_segmented_worms_sp	0.81	0	0	0	0	0	0	0	0	0	0	0	0	0	0	0	0	0	0	0	0	0	0	0	0	0	0	0	0	0	0	0	0	0	0
a54e4f33fcbdcadfc10890e0f24cdccaeb1ee0bc	#N/A	Metazoa	1	Annelida	0.95	Clitellata	0.94	Enchytraeida	0.94	Enchytraeidae	0.94	Fridericia_segmented_worms	0.92	Fridericia_segmented_worms_sp	0.91	0	0	0	0	0	0	0	0	0	0	0	0	0	0	0	0	0	0	0	0	0	0	0	0	0	0	0	0	0	0	0	0	0	0
e4625cdcbe797411759befccf1850d4e79c0872b	#N/A	Metazoa	1	Annelida	0.97	Clitellata	0.96	Enchytraeida	0.94	Enchytraeidae	0.94	Fridericia_segmented_worms	0.91	Fridericia_segmented_worms_sp	0.89	0	0	0	0	18	0	0	0	0	0	0	0	0	0	0	0	0	0	0	0	0	0	0	0	189	35	0	247	0	838	0	0	8	6
45eff193bb42dd249ad04e5c1f9f6e9bb57efe34	#N/A	Metazoa	0.99	Annelida	0.91	Clitellata	0.91	Enchytraeida	0.91	Enchytraeidae	0.91	Fridericia_segmented_worms	0.9	Fridericia_segmented_worms_sp	0.8	0	0	0	0	0	0	0	0	0	0	0	0	0	0	0	0	0	0	0	0	0	0	0	0	0	0	0	0	3	0	0	0	0	0
60ac6570072e20f2314d65d996cf8db27d92cc42	#N/A	Metazoa	1	Annelida	0.89	Clitellata	0.89	Enchytraeida	0.88	Enchytraeidae	0.88	Fridericia_segmented_worms	0.85	Fridericia_segmented_worms_sp	0.82	0	0	0	0	0	0	0	0	0	0	0	0	0	0	0	0	0	0	0	0	0	0	0	0	0	0	0	0	3	0	0	0	0	0
096ce1b6604bcfdc479d6439432178460d1248b3	#N/A	Metazoa	1	Annelida	1	Clitellata	1	Enchytraeida	1	Enchytraeidae	1	Fridericia_segmented_worms	1	Fridericia_sylvatica	1	0	0	0	0	161	0	30	50	458	297	657	0	0	0	0	0	120	73	51	0	0	0	0	0	0	0	26	114	29	38	32	78	30	52
74318f8b2a8e3ad4a51e5fc5c0dffa824c44d42c	#N/A	Metazoa	1	Annelida	1	Clitellata	1	Enchytraeida	1	Enchytraeidae	1	Fridericia_segmented_worms	1	Fridericia_sylvatica	1	0	0	0	0	0	0	0	0	0	0	0	0	0	0	0	0	0	0	0	0	0	0	0	0	0	0	0	0	0	0	0	0	0	0
e52f063362f49fa9f491f96f3883d273a5a27971	#N/A	Metazoa	1	Annelida	1	Clitellata	1	Enchytraeida	1	Enchytraeidae	1	Fridericia_segmented_worms	1	Fridericia_sylvatica	1	0	0	0	0	0	0	0	0	0	0	0	0	0	0	0	0	0	0	0	0	0	0	0	0	0	0	0	0	0	0	0	0	0	0
f5e42690e86c2ccdf629e90b61f2357fae9deb9a	#N/A	Metazoa	1	Annelida	1	Clitellata	1	Enchytraeida	1	Enchytraeidae	1	Fridericia_segmented_worms	1	Fridericia_sylvatica	1	0	0	0	0	0	0	0	0	0	0	0	0	0	0	0	0	0	0	0	0	0	0	0	0	0	0	0	0	0	0	0	0	0	0
b536531448861dc3140e2358d4d864e0338c3e66	#N/A	Metazoa	1	Arthropoda	1	Collembola	1	Poduromorpha	1	Neanuridae	1	Friesea	1	Friesea_claviseta	1	0	0	0	0	0	0	0	0	0	0	0	0	0	0	0	0	0	0	0	0	0	0	0	0	0	0	0	56	0	0	0	0	0	0
eed800f781c03eb7d968593b8097963d372523fc	#N/A	Metazoa	1	Arthropoda	1	Collembola	1	Poduromorpha	1	Neanuridae	1	Friesea	1	Friesea_claviseta	1	0	0	0	0	0	0	0	0	0	0	0	0	0	0	0	0	0	0	0	0	0	0	0	0	0	0	38	0	0	0	0	0	0	0
c1acbc8393657cb8f0baac0a94425989085a2d38	#N/A	Metazoa	1	Mollusca	1	Gastropoda	1	Stylommatophora	1	Camaenidae	1	Fruticicola	1	Fruticicola_fruticum	1	0	0	0	0	0	0	0	0	0	0	0	0	47	0	0	0	0	0	0	0	0	0	0	0	0	0	0	0	0	0	0	2	0	0
806c3d38eedf50f33cb12676c0436fc98848bdda	#N/A	Metazoa	1	Arthropoda	1	Chilopoda	1	Geophilomorpha	1	Geophilidae	1	Geophilus	1	Geophilus_flavus	1	1775	0	0	0	0	0	0	0	0	0	0	0	0	0	0	0	0	0	0	0	0	0	0	0	0	0	0	0	0	3594	0	0	0	0
aec846bec10cc10d1796a72c49e04fe040c34dcc	#N/A	Metazoa	1	Arthropoda	1	Chilopoda	1	Geophilomorpha	1	Geophilidae	1	Geophilus	1	Geophilus_flavus	1	2	0	0	0	0	0	0	0	0	0	0	0	0	0	0	0	0	0	0	0	0	0	0	0	0	0	0	0	0	0	0	0	0	0
60ca404aa531facd48d02d909f9446ee647aaae4	#N/A	Metazoa	1	Arthropoda	1	Chilopoda	0.97	Geophilomorpha	0.97	Geophilidae	0.97	Geophilus	0.97	Geophilus_flavus	0.97	0	0	0	0	0	0	0	2	0	0	0	0	0	0	0	0	0	0	0	0	0	0	0	0	0	0	0	0	0	0	0	0	0	0
db8a59dabcd05372be95a8c442e720caaa5b553f	#N/A	Metazoa	0.97	Arthropoda	0.92	Chilopoda	0.92	Geophilomorpha	0.92	Geophilidae	0.92	Geophilus	0.92	Geophilus_sp	0.92	2	0	0	0	0	0	0	0	0	0	0	0	0	0	0	0	0	0	0	0	0	0	0	0	0	0	0	0	0	0	0	0	0	0
890b6ca1620ccbb4e9a87268c1bf4469662fd9c7	#N/A	Metazoa	1	Arthropoda	1	Collembola	1	Symphypleona	1	Katiannidae	1	Gisinianus	1	Gisinianus_flammeolus	1	0	0	0	0	0	0	6	0	0	0	0	0	0	0	0	0	0	159	0	0	0	0	2	0	0	0	3	0	0	0	0	0	6	0
4694129363b112c0a2ea5b71a80236614df79a1c	#N/A	Metazoa	1	Annelida	1	Clitellata	1	Enchytraeida	1	Enchytraeidae	1	Hemifridericia	1	Hemifridericia_parva	1	0	0	0	0	0	0	0	0	2	0	0	14	0	0	0	0	0	0	0	0	0	0	0	9	0	17	5	2	0	0	0	3	0	0
6735d0a961adae95e9efafa3e339eb91c8e5d8f8	#N/A	Metazoa	1	Annelida	1	Clitellata	1	Enchytraeida	1	Enchytraeidae	1	Hemifridericia	1	Hemifridericia_parva	1	0	0	0	0	0	0	0	0	0	0	0	0	0	0	0	0	0	0	0	0	0	0	17	0	0	0	0	0	2	3	0	0	0	0
7cac8aff8d33459c2b0928a877e8d254e370deee	#N/A	Metazoa	1	Annelida	1	Clitellata	1	Enchytraeida	1	Enchytraeidae	1	Henlea	1	Henlea_glandulifera	1	0	0	0	0	0	0	0	0	0	0	0	0	0	0	2	0	0	0	0	0	0	0	0	0	0	0	0	0	0	0	0	0	0	0
9bc38bda31d613c99e964b276899a4c46d9f01dc	#N/A	Metazoa	1	Annelida	1	Clitellata	1	Enchytraeida	1	Enchytraeidae	1	Henlea	1	Henlea_glandulifera	1	0	0	0	0	0	0	0	0	0	0	0	0	0	0	0	0	0	0	0	0	0	0	0	0	0	0	0	0	0	0	0	0	0	0
a1e7a5de5cebfcb44f253ab85eca586cbdc2cc3a	#N/A	Metazoa	1	Annelida	1	Clitellata	1	Enchytraeida	1	Enchytraeidae	1	Henlea	1	Henlea_glandulifera	1	0	0	0	0	0	0	0	0	0	0	0	0	0	2	15	24	0	497	16	0	23	0	0	0	0	0	0	15	4	8	0	8	0	0
d61493ae6c6df8db99f7144a741d95799d75964a	#N/A	Metazoa	1	Annelida	1	Clitellata	1	Enchytraeida	1	Enchytraeidae	1	Henlea	1	Henlea_glandulifera	1	0	0	0	0	0	0	0	0	0	0	0	0	0	0	2	0	0	0	0	0	0	0	0	0	0	0	0	0	0	0	0	0	0	0
e74959a1f3f3c58a27e8ff2be9593ba2c45c3a7d	#N/A	Metazoa	1	Annelida	1	Clitellata	1	Enchytraeida	1	Enchytraeidae	1	Henlea	1	Henlea_glandulifera	1	0	0	0	0	16	0	0	0	0	0	6	0	0	0	689	8	13	51	26	0	296	0	6	0	5	5	11	7	17	34	9	10	0	13
08c15232bc20b239c1034164d97c8849f4fe39a8	#N/A	Metazoa	1	Annelida	0.99	Clitellata	0.99	Enchytraeida	0.98	Enchytraeidae	0.98	Henlea	0.98	Henlea_glandulifera	0.98	0	0	0	0	0	0	0	0	0	0	0	0	0	0	0	0	0	0	0	0	0	0	0	0	0	0	0	0	0	4	0	0	0	0
4679f741719cb29fbd046b301b35111019fd1cc6	#N/A	Metazoa	1	Annelida	0.98	Clitellata	0.98	Enchytraeida	0.98	Enchytraeidae	0.98	Henlea	0.98	Henlea_glandulifera	0.98	0	0	0	0	0	0	0	0	0	0	0	0	0	0	0	0	0	4	0	0	0	0	0	0	0	0	0	0	0	0	0	0	0	0
690047c2c6455a343de0d914b3f022cfe87236d0	#N/A	Metazoa	1	Annelida	0.99	Clitellata	0.99	Enchytraeida	0.99	Enchytraeidae	0.99	Henlea	0.96	Henlea_glandulifera	0.96	0	0	0	0	0	0	0	0	0	0	0	0	0	0	0	0	0	0	0	0	0	0	0	0	0	0	0	0	0	0	0	0	0	3
abb8f65d55e3d9e8c575e8a29e7f1e016622ec1f	#N/A	Metazoa	1	Annelida	1	Clitellata	1	Enchytraeida	1	Enchytraeidae	1	Henlea	0.99	Henlea_nasuta	0.99	0	0	0	0	0	0	0	0	0	0	0	0	0	0	0	0	0	0	0	0	0	0	0	0	0	0	0	0	0	0	0	0	0	0
b9d897f18aa9d9f1c064501711479695299aeb7d	#N/A	Metazoa	1	Annelida	0.99	Clitellata	0.99	Enchytraeida	0.99	Enchytraeidae	0.99	Henlea	0.99	Henlea_nasuta	0.99	0	0	2	0	0	0	0	0	0	0	0	2	0	0	0	0	3	0	0	0	0	0	0	0	84	0	0	0	2	14	0	5	0	0
01c9c44aab6c0aeed8188bb580fd3208bbe924e1	#N/A	Metazoa	0.99	Annelida	0.96	Clitellata	0.95	Enchytraeida	0.95	Enchytraeidae	0.95	Henlea	0.95	Henlea_nasuta	0.95	0	0	0	0	0	0	0	0	0	0	0	0	0	0	0	0	0	0	0	0	0	0	0	0	0	0	0	0	0	2	0	0	0	0
b2aeb915c26710be6161a56929414f61b143e22c	#N/A	Metazoa	1	Annelida	1	Clitellata	1	Enchytraeida	1	Enchytraeidae	1	Henlea	1	Henlea_perpusilla	1	0	0	0	33	26	0	0	0	8	0	7	0	0	0	10	0	12	9	0	0	5	5	0	0	0	0	4	7	9	164	0	1186	0	10
37ce7d9da77e902a35b06b484e792ffae683057a	#N/A	Metazoa	1	Arthropoda	1	Malacostraca	1	Isopoda	1	Trichoniscidae	1	Hyloniscus	1	Hyloniscus_riparius	1	0	0	0	0	0	3	0	0	0	0	0	0	0	0	0	0	0	0	0	0	0	0	0	0	0	0	0	0	0	0	0	0	0	0
3adcf463bf5f7dd774fc32fde74edfe912bfaf02	#N/A	Metazoa	1	Arthropoda	1	Malacostraca	1	Isopoda	1	Trichoniscidae	1	Hyloniscus	1	Hyloniscus_riparius	1	0	0	0	3	0	0	17	11	0	26	42	0	27	31	0	0	8	0	0	3	0	7	3	0	0	0	0	3	0	0	3	0	49	0
da713488a8f458d0e8f48f9c666cfa34e66235c6	#N/A	Metazoa	1	Arthropoda	1	Malacostraca	0.99	Isopoda	0.99	Trichoniscidae	0.99	Hyloniscus	0.99	Hyloniscus_riparius	0.99	0	0	0	0	3	0	0	0	0	0	0	0	0	0	0	0	0	0	0	0	0	0	0	0	0	0	0	0	0	0	0	0	0	0
31cc58baf4de8ad997dff631cbb6e0826deb7fb4	#N/A	Metazoa	1	Tardigrada	1	Eutardigrada	1	Parachela_tardigrades	1	Hypsibiidae	1	Hypsibius	1	Hypsibius_dujardini	1	12	8	0	0	0	0	0	0	0	0	0	0	0	0	0	0	0	0	0	0	0	0	0	0	0	0	0	0	0	0	0	0	0	0
911da56035e04439f293b42b2432da26cff09a39	#N/A	Metazoa	1	Tardigrada	0.99	Eutardigrada	0.99	Parachela_tardigrades	0.99	Hypsibiidae	0.99	Hypsibius	0.99	Hypsibius_dujardini	0.98	17	32	0	16	19	34	0	0	0	0	0	0	0	0	0	0	0	2	0	0	0	2	0	0	0	0	0	0	2	6	4	21	47	8
de6f76c9ab0c37ffc74bcae7204273224fef5e91	#N/A	Metazoa	1	Arthropoda	1	Insecta	1	Lepidoptera	1	Geometridae	1	Idaea	1	Idaea_biselata	1	0	0	0	0	4	0	0	0	0	0	0	0	0	0	0	0	0	0	0	0	0	0	0	0	0	0	0	0	0	0	0	0	0	10
7d08a25c535ae1f6a2b0b0fae787e7ed6c41c543	#N/A	Metazoa	1	Arthropoda	0.99	Collembola	0.9	Entomobryomorpha	0.9	Isotomidae	0.9	Isotoma_springtails	0.9	Isotoma_springtails_sp	0.9	0	0	0	0	0	0	0	0	0	0	0	0	0	0	0	0	6	0	0	0	3	0	0	2	9	12	2	0	0	0	0	0	0	0
cb38786abb49e6f9a84076a8c043be7532252cd6	#N/A	Metazoa	1	Arthropoda	1	Collembola	1	Entomobryomorpha	1	Isotomidae	1	Isotoma_springtails	1	Isotoma_viridis	1	0	0	3	0	0	0	0	0	0	0	0	0	0	0	0	0	0	0	0	0	0	0	0	0	0	0	0	0	0	0	0	0	0	0
7a35754176ecf79bce833fb1c4cb19dbe100a971	#N/A	Metazoa	1	Arthropoda	0.99	Collembola	0.96	Entomobryomorpha	0.96	Isotomidae	0.96	Isotoma_springtails	0.96	Isotoma_viridis	0.96	0	0	0	0	5	0	0	0	0	0	0	0	0	0	0	0	0	0	0	0	0	0	0	0	0	0	0	0	0	0	0	0	0	0
18769a156b42c228e3a2505583c0dd81a698e65f	#N/A	Metazoa	1	Arthropoda	1	Collembola	1	Entomobryomorpha	1	Isotomidae	1	Isotomiella	1	Isotomiella_minor	1	4	0	0	0	0	0	0	0	0	0	0	4	3	0	0	0	8	0	0	4	0	0	23	0	0	0	0	0	0	2	0	0	3	0
d38b2da51ce41d7000f5c47027c0d0ebb2837df4	#N/A	Metazoa	1	Arthropoda	1	Collembola	1	Entomobryomorpha	1	Isotomidae	1	Isotomiella	1	Isotomiella_minor	1	0	0	0	0	0	0	0	0	0	0	0	209	0	0	0	0	0	0	17	65	27	153	293	0	0	0	0	0	0	3	0	0	0	0
228b61cbe4edec6ae8a7c92d69560c886ad4e4cf	#N/A	Metazoa	1	Arthropoda	1	Collembola	1	Entomobryomorpha	1	Isotomidae	1	Isotomurus	1	Isotomurus_fucicola	1	0	0	0	0	0	0	0	0	0	0	0	0	0	0	0	0	0	0	0	0	0	0	0	0	0	0	0	2	0	0	0	0	0	0
4158f0bbd035382cfc647f979eb38b321c3dd7a3	#N/A	Metazoa	1	Arthropoda	1	Collembola	1	Entomobryomorpha	1	Isotomidae	1	Isotomurus	1	Isotomurus_fucicola	1	0	0	0	0	0	0	0	0	0	0	0	0	0	0	0	0	0	0	0	0	0	0	0	0	0	0	0	4	0	0	0	0	0	0
2687884847afb59745af8b4cca2f68772fc08e99	#N/A	Metazoa	1	Arthropoda	1	Collembola	1	Entomobryomorpha	1	Isotomidae	1	Isotomurus	1	Isotomurus_graminis	1	0	0	0	0	0	0	0	0	0	0	0	0	0	0	0	0	2	0	0	0	0	0	0	0	0	0	0	0	0	0	0	0	0	0
5a2a7438272a2247783bc17c759f320c5fb47e90	#N/A	Metazoa	1	Arthropoda	1	Collembola	1	Entomobryomorpha	1	Isotomidae	1	Isotomurus	1	Isotomurus_graminis	1	2	0	0	0	0	0	0	0	0	0	0	0	0	0	0	0	0	0	0	0	0	0	0	0	5	0	355	29	0	4	0	0	0	0
593587cc1052bdfccc768a55b2548d3d8b4365a9	#N/A	Metazoa	1	Arthropoda	1	Insecta	1	Hymenoptera	1	Formicidae	1	Lasius_genus	1	Lasius_flavus	1	0	0	0	0	0	0	0	0	0	0	0	0	0	0	0	0	0	0	0	0	0	0	0	0	0	0	0	0	0	0	0	0	0	0
f6b8d24396dac8425aedb939ad9ad25b33fa6e3d	#N/A	Metazoa	1	Arthropoda	1	Insecta	1	Coleoptera	1	Staphylinidae	1	Lathrobium	1	Lathrobium_longulum	1	0	0	0	0	0	0	0	15	0	0	0	0	0	0	0	0	0	0	0	0	0	0	0	0	0	0	0	0	0	0	3	0	0	0
1697cc511f321ddffb716a5b0c9824e1cd902af0	#N/A	Metazoa	1	Arthropoda	1	Collembola	1	Entomobryomorpha	1	Entomobryidae	1	Lepidocyrtus	1	Lepidocyrtus_cyaneus	1	0	0	0	0	0	0	0	0	0	0	0	0	0	0	0	0	18	0	0	0	0	0	0	1586	844	825	1152	1828	0	36	0	0	0	0
62416b3cd47b87577ef7e7fbac8e0b4f83a38338	#N/A	Metazoa	1	Arthropoda	1	Collembola	1	Entomobryomorpha	1	Entomobryidae	1	Lepidocyrtus	1	Lepidocyrtus_lanuginosus	0.99	0	0	0	0	0	0	0	0	0	0	0	232	154	0	91	0	101	0	0	0	0	462	0	0	0	0	0	0	0	0	0	0	0	0
c41a442ae8019aa8f7d31872e23629271c3b6587	#N/A	Metazoa	1	Arthropoda	1	Collembola	1	Entomobryomorpha	1	Entomobryidae	1	Lepidocyrtus	1	Lepidocyrtus_lanuginosus	0.99	0	0	0	0	0	0	0	0	0	0	0	7	0	0	0	0	0	0	0	0	0	0	0	0	0	0	0	0	0	0	0	0	0	0
e4c8a45bafa082a993999a5c5816e9e34587379f	#N/A	Metazoa	1	Arthropoda	1	Collembola	1	Entomobryomorpha	1	Entomobryidae	1	Lepidocyrtus	1	Lepidocyrtus_lanuginosus	0.96	0	0	0	0	0	0	0	0	0	0	0	12	0	0	0	0	0	0	0	0	0	0	0	0	0	0	0	0	0	0	0	0	0	0
033383a9846299933aee83ea50e0c77217cda204	#N/A	Metazoa	1	Arthropoda	0.99	Collembola	0.9	Entomobryomorpha	0.89	Entomobryidae	0.86	Lepidocyrtus	0.86	Lepidocyrtus_sp	0.81	0	0	0	0	0	0	0	0	0	0	0	3	0	0	0	0	5	0	0	0	0	0	0	0	0	0	0	0	0	0	3	0	0	0
bf0d253399d58030a78e4263002f6127032a92e9	#N/A	Metazoa	1	Arthropoda	0.99	Collembola	0.89	Entomobryomorpha	0.87	Entomobryidae	0.85	Lepidocyrtus	0.85	Lepidocyrtus_sp	0.85	0	0	0	0	0	0	0	0	0	0	0	0	0	0	0	0	0	0	0	0	0	0	0	0	0	0	0	0	0	0	0	0	0	0
46a9fb279afe3d45b304409d09d63e9181f94096	#N/A	Metazoa	1	Arthropoda	1	Chilopoda	0.96	Lithobiomorpha	0.96	Lithobiidae	0.96	Lithobius	0.96	Lithobius_curtipes	0.96	0	0	0	3	0	0	0	0	0	0	0	0	0	0	0	0	97	0	0	0	2	0	0	0	0	0	0	0	0	0	2	0	0	0
85e9f8239484073bf1c091ea9eb9cbc1662c7cc1	#N/A	Metazoa	0.98	Arthropoda	0.96	Chilopoda	0.88	Lithobiomorpha	0.87	Lithobiidae	0.87	Lithobius	0.87	Lithobius_sp	0.83	0	0	0	0	0	0	0	0	0	0	2	0	0	0	0	0	0	0	0	0	0	0	0	0	0	0	0	0	0	0	0	0	0	0
ba3f606dcc7b29d7b295f1b567ee5f8d905fd036	#N/A	Metazoa	1	Arthropoda	0.95	Insecta	0.94	Coleoptera	0.84	Chrysomelidae	0.84	Longitarsus	0.8	Longitarsus_sp	0.78	0	0	0	0	0	0	0	0	0	0	0	0	0	0	0	0	0	0	0	0	0	0	0	0	0	0	0	0	0	2	0	0	0	0
d7287f60a51bb0db441e5a5fa985f5bc76b443b6	#N/A	Metazoa	1	Annelida	1	Clitellata	1	Crassiclitellata	1	Lumbricidae	1	Lumbricus	1	Lumbricus_castaneus	1	0	0	0	0	0	0	0	0	0	0	0	0	0	0	0	0	0	0	0	0	0	0	0	0	0	0	23	0	0	0	0	0	0	0
d9fbe9f94250bd33805fbc180500f8673f3aad19	#N/A	Metazoa	1	Annelida	1	Clitellata	1	Crassiclitellata	1	Lumbricidae	1	Lumbricus	1	Lumbricus_castaneus	1	0	0	0	0	0	0	0	0	0	0	0	0	0	0	0	0	0	0	0	0	0	0	0	0	0	0	0	0	0	5	0	0	0	0
e0b4e596db43a5fb054ebc4c2555c627ac4bab49	#N/A	Metazoa	1	Annelida	1	Clitellata	1	Crassiclitellata	1	Lumbricidae	1	Lumbricus	1	Lumbricus_rubellus	1	0	0	0	0	0	0	0	0	0	0	0	0	0	0	0	0	0	0	0	0	0	0	0	0	0	11	146	0	0	52	0	0	0	0
f0d367317cb34b8decfdd7bbd51ff26588c9c533	#N/A	Metazoa	1	Annelida	1	Clitellata	1	Crassiclitellata	1	Lumbricidae	1	Lumbricus	1	Lumbricus_rubellus	1	0	0	0	0	0	0	0	0	0	0	0	0	0	0	0	0	0	0	0	0	0	0	0	0	0	0	0	0	0	0	5	0	0	0
8ad54017e7376878ecef8fd7830741388a50c4a7	#N/A	Metazoa	1	Annelida	1	Clitellata	1	Crassiclitellata	1	Lumbricidae	1	Lumbricus	1	Lumbricus_sp	0.8	0	0	0	0	0	0	0	0	0	0	0	0	0	0	0	0	0	0	0	0	0	0	0	0	0	0	0	0	0	2	0	0	0	0
e0c41c73b5f2787b0b399ab3a5a0876c4e6c3e9b	#N/A	Metazoa	1	Annelida	1	Clitellata	1	Crassiclitellata	1	Lumbricidae	1	Lumbricus	1	Lumbricus_sp	0.63	0	0	0	0	0	0	0	0	0	0	0	0	14	0	0	0	128	831	0	0	0	0	0	0	0	0	0	0	0	491	0	0	0	0
10c8aa8a22d375e546d9613065ccd7e2a870b003	#N/A	Metazoa	1	Annelida	1	Clitellata	1	Crassiclitellata	1	Lumbricidae	1	Lumbricus	1	Lumbricus_terrestris	1	0	0	0	0	0	0	0	0	0	0	0	0	0	0	0	0	0	0	0	0	0	3	0	0	3	0	0	0	0	13	0	0	5	160
5e786d5154b277491ea43d8ab3ae6267cdc5a263	#N/A	Metazoa	1	Mollusca	1	Gastropoda	1	Stylommatophora	1	Limacidae	1	Malacolimax	1	Malacolimax_tenellus	1	0	0	0	0	0	7	0	0	0	0	0	0	0	0	0	0	0	0	0	0	0	0	0	0	0	0	0	0	0	0	0	0	0	0
8fdd9d768e196170a08c2bc3105cba9750885321	#N/A	Metazoa	1	Arthropoda	1	Insecta	1	Coleoptera	1	Cantharidae	1	Malthodes	1	Malthodes_mysticus	1	0	0	0	0	0	0	0	0	0	0	0	0	0	0	0	0	0	0	0	0	10	0	0	0	0	0	0	0	0	0	0	0	0	2
6518ca351bba063ef3d1a7c51e575d859aeea768	#N/A	Metazoa	1	Arthropoda	1	Insecta	1	Coleoptera	1	Cantharidae	1	Malthodes	1	Malthodes_pumilus	1	0	0	0	0	0	0	0	0	0	0	0	0	0	0	0	0	0	0	0	0	0	0	0	0	0	0	0	0	0	0	0	0	0	0
520e12f58f26ea239538df7766cfb40b5c29c44a	#N/A	Metazoa	1	Annelida	1	Clitellata	1	Enchytraeida	1	Enchytraeidae	1	Marionina	1	Marionina_communis	1	0	0	0	2	0	0	0	0	0	0	0	0	0	0	0	56	23	0	0	0	0	0	0	0	0	0	50	22	13	0	0	0	0	0
2856cd2c2a553d3607744b57fc3cd265b7eee987	#N/A	Metazoa	1	Annelida	0.99	Clitellata	0.99	Enchytraeida	0.99	Enchytraeidae	0.99	Marionina	0.98	Marionina_communis	0.98	0	0	0	49	0	0	0	0	0	2	0	0	0	0	0	0	0	0	0	0	0	0	3	0	0	0	4	4	0	0	0	7	264	0
52ea8f9212efa45b7bfaba60873e0b6207486f9b	#N/A	Metazoa	1	Annelida	0.98	Clitellata	0.98	Enchytraeida	0.97	Enchytraeidae	0.97	Marionina	0.94	Marionina_sp	0.94	0	0	0	0	0	0	0	0	0	0	0	0	0	0	0	0	0	0	0	0	0	0	0	0	0	0	0	0	0	0	0	0	6	0
bc2bd6af27bc1992ceec6b81094c2f562a482ab5	#N/A	Metazoa	1	Annelida	0.96	Clitellata	0.96	Enchytraeida	0.93	Enchytraeidae	0.93	Marionina	0.87	Marionina_sp	0.87	0	0	0	0	0	0	0	0	0	0	0	0	0	0	0	0	0	0	0	0	0	0	0	0	0	0	0	0	0	0	0	0	3	0
e5229712942b4fe3eb0081962340ca4631a66232	#N/A	Metazoa	0.84	Annelida	0.83	Clitellata	0.83	Enchytraeida	0.82	Enchytraeidae	0.82	Marionina	0.81	Marionina_sp	0.81	0	0	0	0	0	0	0	0	0	0	0	0	0	0	0	0	0	2	0	0	0	0	0	0	0	0	0	0	0	0	0	0	0	0
591cbdbf58b0c8c4101f60ab49b30d0527c3c8c6	#N/A	Metazoa	1	Arthropoda	1	Insecta	1	Diptera	0.94	Phoridae	0.85	Megaselia	0.83	Megaselia_sp	0.15	0	0	0	0	0	0	0	0	0	0	0	0	0	0	0	0	0	0	0	0	0	0	0	0	0	0	0	0	0	0	4	0	0	0
d2dcdaf17531753f47f398e64201be15fe9dc0ed	#N/A	Metazoa	1	Arthropoda	1	Arachnida	1	Sarcoptiformes	1	Oribotritiidae	1	Mesotritia	1	Mesotritia_nuda	1	0	0	25	46	6	34	22	52	0	0	30	0	0	0	0	0	20	0	5	0	0	7	10	0	28	0	0	15	0	14	0	32	8	0
befa0640a838cbe455c4e74096969e57f4b0db68	#N/A	Metazoa	1	Arthropoda	0.98	Arachnida	0.95	Sarcoptiformes	0.95	Oribotritiidae	0.95	Mesotritia	0.95	Mesotritia_nuda	0.95	0	0	0	0	0	0	0	0	0	0	0	0	0	0	0	0	0	0	0	0	0	0	0	0	0	0	0	0	0	0	0	0	0	0
019bca8e5a0f85c755724bd858ea432f2753a8d7	#N/A	Metazoa	1	Arthropoda	1	Arachnida	0.91	Sarcoptiformes	0.91	Oribotritiidae	0.91	Mesotritia	0.91	Mesotritia_sp	0.91	0	0	0	0	0	0	0	0	0	0	0	0	0	0	0	0	0	0	0	0	0	0	0	0	0	0	0	0	0	0	0	0	0	0
1e2b6c9ae2d592506cd587143713e29cd3a40c4b	#N/A	Metazoa	0.88	Arthropoda	0.86	Arachnida	0.85	Sarcoptiformes	0.85	Oribotritiidae	0.85	Mesotritia	0.85	Mesotritia_sp	0.85	0	0	0	0	0	0	0	0	0	0	0	0	0	0	0	0	0	0	0	0	0	0	0	0	0	0	0	2	0	0	0	0	0	0
6ddb713838b93095facab1619f146eb0e2176070	#N/A	Metazoa	1	Arthropoda	1	Insecta	1	Diptera	1	Limoniidae	1	Metalimnobia	1	Metalimnobia_sp	0.76	0	0	0	0	0	0	0	0	0	0	0	0	0	0	0	0	0	0	0	0	0	0	0	0	0	0	0	0	0	0	0	0	0	0
1cc7dd4242ef37e993529e6a1858434f271ec3e2	#N/A	Metazoa	1	Arthropoda	1	Insecta	1	Diptera	1	Limoniidae	1	Metalimnobia	1	Metalimnobia_sp	0.68	0	0	0	0	0	0	0	99	0	0	0	0	5	0	0	0	0	0	0	0	0	0	0	4	3	0	6	0	0	3	2	0	6	2
375d3f679207108855b589d2528f3b87bfd72a8a	#N/A	Metazoa	1	Arthropoda	1	Insecta	1	Diptera	1	Limoniidae	1	Metalimnobia	1	Metalimnobia_sp	0.56	0	0	0	0	0	0	0	0	0	0	0	0	0	0	0	0	0	0	0	0	2	0	0	0	0	0	0	0	0	0	0	0	0	0
5d7fd907493f0176277ccf1b6ffa72a245bc41e6	#N/A	Metazoa	1	Arthropoda	1	Insecta	1	Psocoptera	1	Psocidae	1	Metylophorus	1	Metylophorus_sp	0.88	0	0	0	0	0	0	0	0	0	0	0	0	0	0	0	0	0	0	0	0	0	0	0	0	0	0	0	0	0	0	0	0	0	0
a5d1b2f5915d4f1a6829a3e60f33d5eca4e6feac	#N/A	Metazoa	1	Arthropoda	1	Collembola	1	Poduromorpha	1	Neanuridae	1	Micranurida	1	Micranurida_pygmaea	1	0	0	0	0	0	0	0	0	0	0	0	0	0	0	0	0	0	0	0	0	0	0	5	0	0	0	0	0	0	0	0	0	0	0
8db073a74cc431b4f95caefe0be885c6fd214331	#N/A	Metazoa	1	Arthropoda	1	Collembola	1	Poduromorpha	1	Onychiuridae	1	Micraphorura	1	Micraphorura_absoloni	1	0	0	0	0	0	0	0	0	0	0	2	8	0	0	0	0	2	2	0	0	0	0	12	0	0	0	0	0	0	3	0	0	0	0
b9aa65f6365e111e9f0b3287affe60ec1e67ff6d	#N/A	Metazoa	1	Arthropoda	1	Insecta	1	Hymenoptera	1	Formicidae	1	Myrmica	1	Myrmica_rubra	0.99	0	2	0	0	0	0	0	99	0	0	0	0	0	0	0	0	3	0	0	0	0	0	0	0	0	0	0	0	0	0	0	0	0	4
a21e4140c1280d45548254beeb8489d4f5a77cc3	#N/A	Metazoa	1	Arthropoda	1	Collembola	1	Poduromorpha	1	Neanuridae	1	Neanura	1	Neanura_muscorum	1	0	16	0	0	0	2	0	0	0	0	0	2	0	0	0	0	2	0	0	0	0	0	0	0	0	0	0	0	0	4	0	0	0	0
cdc5e064b040c9d86f576bbab6b57181b43fd7c8	#N/A	Metazoa	1	Arthropoda	1	Collembola	1	Poduromorpha	1	Neanuridae	1	Neanura	1	Neanura_muscorum	1	0	0	0	3	0	0	0	0	0	0	0	0	28	0	0	0	0	0	0	0	0	0	0	0	0	0	0	0	0	0	17	0	0	0
44548d0073dee2ad920334030e69572fe10140d5	#N/A	Metazoa	1	Arthropoda	0.99	Collembola	0.99	Poduromorpha	0.98	Neanuridae	0.98	Neanura	0.98	Neanura_muscorum	0.98	0	0	0	0	0	0	0	0	0	0	0	0	0	0	0	0	0	0	0	0	0	0	0	0	0	0	0	0	0	0	3	0	0	0
fb59eac3c9842b519c90c6533618ae37cfc29c79	#N/A	Metazoa	1	Arthropoda	1	Arachnida	1	Opiliones	1	Nemastomatidae	1	Nemastoma_daddy_longlegs	1	Nemastoma_lugubre	1	0	0	0	0	0	0	0	0	0	0	0	0	0	0	0	0	0	0	0	0	0	0	0	0	0	0	0	0	0	0	0	0	0	5
b0c6328e756087dc9bcef958beb8637c5edeb181	#N/A	Metazoa	1	Arthropoda	1	Arachnida	1	Opiliones	1	Nemastomatidae	1	Nemastoma_daddy_longlegs	1	Nemastoma_lugubre	1	0	0	0	0	0	0	0	0	0	0	0	0	0	0	0	0	0	0	0	0	0	0	0	0	0	0	0	0	0	0	0	0	0	4
c27d0ace23e8c6795ce6205f407614d796e70400	#N/A	Metazoa	1	Arthropoda	1	Insecta	1	Hymenoptera	0.98	Tenthredinidae	0.98	Nesoselandria	0.97	Nesoselandria_morio	0.97	2	0	0	0	0	0	0	0	0	0	0	0	0	0	0	0	0	0	0	0	0	0	0	0	0	0	0	0	0	0	0	0	0	0
03f41d44a0e78e4ba6c25efcecd5146066da8426	#N/A	Metazoa	1	Mollusca	1	Gastropoda	1	Stylommatophora	1	Oxychilidae	1	Nesovitrea	1	Nesovitrea_sp._BOLD:ABV9664	1	0	0	0	0	0	0	0	0	0	0	0	0	0	0	0	0	0	0	0	0	0	0	0	0	0	0	0	0	0	0	0	0	45	0
711fb85d7b3f3818ac84f214362cf9794a705647	#N/A	Metazoa	1	Arthropoda	1	Insecta	1	Diptera	1	Cecidomyiidae	1	Neurolyga	1	Neurolyga_excavata	1	0	0	0	0	0	0	0	0	0	0	4	0	0	0	0	0	0	0	0	0	0	0	0	0	0	0	0	0	0	0	0	0	0	0
de49663d2e3a5f0ff458b525ad5591093a8cc468	#N/A	Metazoa	1	Arthropoda	0.99	Insecta	0.99	Diptera	0.98	Cecidomyiidae	0.98	Neurolyga	0.98	Neurolyga_excavata	0.98	0	0	0	0	0	0	0	0	0	0	2	0	0	0	0	0	0	0	0	0	0	0	0	0	0	0	0	0	0	0	0	0	0	0
1b869e1d0055a9ce5db46edbcdfd2fbb0aed3b93	#N/A	Metazoa	1	Arthropoda	1	Insecta	1	Coleoptera	1	Carabidae	1	Notiophilus	1	Notiophilus_palustris	1	0	0	0	0	0	0	0	0	0	0	0	0	0	0	0	0	0	0	0	0	0	0	0	0	0	0	0	0	0	3	0	0	0	0
4d2b3fc00f106393068d9da53ab602bf4d11d955	#N/A	Metazoa	1	Arthropoda	1	Insecta	1	Diptera	1	Culicidae	1	Ochlerotatus_genus	1	Ochlerotatus_genus_sp	0.85	0	0	0	0	0	0	0	0	0	0	0	0	0	0	0	0	0	0	0	0	0	0	0	0	0	0	0	0	0	0	2	0	0	0
3774a231f2b91cd8a8bfad4eb75b8abd38de2d4e	#N/A	Metazoa	1	Annelida	1	Clitellata	1	Enchytraeida	1	Enchytraeidae	1	Oconnorella	1	Oconnorella_cambrensis	1	0	0	0	0	0	0	0	0	3	0	0	0	0	0	0	0	0	0	0	0	0	0	0	0	0	0	0	0	0	0	0	0	0	0
53da7b48874be6594fb834c1c03b757cf430d65c	#N/A	Metazoa	1	Annelida	1	Clitellata	1	Enchytraeida	1	Enchytraeidae	1	Oconnorella	1	Oconnorella_cambrensis	1	0	0	0	0	0	0	0	0	0	0	0	0	0	0	0	0	0	0	0	0	0	0	0	0	0	0	0	0	0	0	0	2	0	0
45d2501972bfc4e72d872684eee6a6393abd92a7	#N/A	Metazoa	1	Arthropoda	1	Arachnida	1	Opiliones	1	Phalangiidae	1	Oligolophus	1	Oligolophus_tridens	1	0	0	0	0	0	14	0	0	0	0	0	0	0	0	0	0	0	0	0	0	0	0	0	0	0	0	0	0	0	0	0	0	0	0
8b28cb2a7eb5794ef11862a7110b35610b275f8c	#N/A	Metazoa	1	Arthropoda	0.99	Diplopoda	0.98	Julida	0.98	Julidae	0.98	Ommatoiulus	0.98	Ommatoiulus_sabulosus	0.98	0	0	0	0	0	0	0	0	0	0	0	0	0	0	0	0	0	0	0	0	0	0	0	0	0	0	0	0	0	0	0	0	0	0
eb9e6ab11072a95f78648bb3eaf819f3c053a49a	#N/A	Metazoa	1	Arthropoda	1	Insecta	1	Lepidoptera	1	Geometridae	1	Operophtera	1	Operophtera_brumata_x_Operophtera_bruceata	1	0	0	0	0	0	0	0	0	0	0	0	0	0	0	0	0	0	0	0	0	0	0	0	0	0	0	0	0	0	4	0	0	0	0
e8104e3eb08639e161f6c04ea66043ad71b604dc	#N/A	Metazoa	1	Arthropoda	1	Insecta	1	Lepidoptera	1	Geometridae	1	Operophtera	1	Operophtera_fagata	1	0	0	0	0	0	0	2	0	0	0	0	0	0	0	0	0	0	0	0	0	0	0	0	0	0	0	0	0	0	0	0	0	21	0
a3aa5706fe74da4c1abe0975126ece05385fdeb9	#N/A	Metazoa	1	Arthropoda	0.99	Arachnida	0.96	Sarcoptiformes	0.96	Oppiidae	0.94	Oppiella	0.94	Oppiella_sp	0.94	0	0	0	0	0	0	0	0	0	0	0	0	0	0	0	0	0	0	0	0	0	0	0	0	0	0	0	0	0	0	4	0	0	0
894b0461eeb5a39a8f5b20ac3f3c930de40a2448	#N/A	Metazoa	1	Arthropoda	1	Collembola	1	Entomobryomorpha	1	Orchesellidae	1	Orchesella	1	Orchesella_flavescens	1	0	0	0	36	0	0	0	0	0	0	62	5	154	0	0	0	6	98	15	16	65	0	0	0	0	0	0	0	0	23	0	0	0	53
b829f3b0608d2d163ccf32e51c2f8ef9af04e6aa	#N/A	Metazoa	1	Arthropoda	1	Collembola	1	Entomobryomorpha	1	Orchesellidae	1	Orchesella	1	Orchesella_flavescens	1	0	0	0	84	0	0	0	6	0	0	0	0	0	0	0	0	0	0	0	0	0	0	0	0	0	0	0	0	0	0	0	0	0	0
3a90284db4a3a5db501378ee7714fe29270706ea	#N/A	Metazoa	1	Arthropoda	1	Insecta	1	Diptera	1	Keroplatidae	1	Orfelia	1	Orfelia_nemoralis	1	0	0	0	0	0	0	10	0	0	0	0	0	0	0	0	0	0	0	0	0	0	0	0	0	0	0	0	0	0	0	0	2	0	0
381cb9593e549ce88a5413dce3a16bcdb8ed61a3	#N/A	Metazoa	1	Arthropoda	1	Insecta	1	Coleoptera	1	Staphylinidae	1	Othius	1	Othius_subuliformis	1	0	0	0	0	0	0	0	0	0	0	0	0	0	0	0	0	0	0	0	0	0	0	0	0	0	0	0	0	0	0	0	0	0	0
9f2911bc20bcaf2a01b1b836203c7a2b64179b02	#N/A	Metazoa	1	Arthropoda	1	Insecta	1	Coleoptera	1	Staphylinidae	1	Othius	1	Othius_subuliformis	1	0	0	0	0	0	0	0	0	0	0	0	0	0	0	0	0	0	0	0	0	0	0	0	0	0	0	0	0	0	0	0	0	0	0
dcdceb3a8db4090d1e8e327d3444ae71d5f0f334	#N/A	Metazoa	1	Arthropoda	1	Insecta	1	Coleoptera	1	Staphylinidae	1	Othius	1	Othius_subuliformis	1	0	0	0	0	0	0	0	3	0	0	0	0	0	0	0	0	0	0	0	0	0	0	0	0	0	0	0	0	0	0	0	0	0	0
64913bfd0d5f377fa879beba9321c3feb205ca27	#N/A	Metazoa	1	Arthropoda	1	Arachnida	1	Araneae	1	Thomisidae	0.95	Ozyptila	0.95	Ozyptila_sp	0.93	0	0	0	0	0	0	0	0	0	0	0	0	0	0	0	0	0	0	0	0	0	0	0	2	0	0	0	0	0	0	0	0	0	0
abd36983919f8759b19292b3d5ae502078644775	#N/A	Metazoa	1	Arthropoda	1	Arachnida	1	Araneae	1	Thomisidae	1	Ozyptila	0.99	Ozyptila_trux	0.97	0	0	0	0	0	0	0	0	0	0	0	0	0	0	0	0	0	0	0	0	0	0	0	0	0	0	0	0	0	0	0	0	0	0
f2c44da6932a4c6f395f6c44367b957aa09c098f	#N/A	Metazoa	1	Tardigrada	1	Eutardigrada	1	Parachela_tardigrades	1	Macrobiotidae	1	Paramacrobiotus	1	Paramacrobiotus_fairbanksi	1	0	17	0	0	0	0	0	0	0	0	0	6	9	0	0	0	0	3	0	0	6	3	18	0	0	0	0	0	0	0	19	0	15	0
8ef847695aaa230229c8804ceb249168f4b8fc11	#N/A	Metazoa	1	Tardigrada	0.99	Eutardigrada	0.99	Parachela_tardigrades	0.99	Macrobiotidae	0.99	Paramacrobiotus	0.99	Paramacrobiotus_sp	0.6	0	0	0	0	0	0	0	0	0	0	0	0	0	0	0	0	0	0	0	0	3	0	0	0	0	0	0	0	0	0	0	0	0	0
85ee8a582be321be096f0657211e0f549b8a4a66	#N/A	Metazoa	1	Arthropoda	1	Collembola	1	Entomobryomorpha	1	Isotomidae	1	Parisotoma	1	Parisotoma_notabilis	1	0	0	6	0	0	0	0	0	0	0	0	0	0	0	0	0	0	0	0	0	0	0	0	0	0	0	0	0	0	0	0	0	0	0
caae8c648915cdda021f9e75cb6bb09fc42db675	#N/A	Metazoa	1	Arthropoda	1	Collembola	1	Entomobryomorpha	1	Isotomidae	1	Parisotoma	1	Parisotoma_notabilis	1	5	8	7	8	0	54	6	22	0	0	10	75	55	11	4	0	30	13	63	0	4	0	0	4	0	0	0	0	0	0	58	31	88	0
cfb9e9c3954fe781ff9facfed948a02a7bda9928	#N/A	Metazoa	1	Arthropoda	1	Collembola	1	Entomobryomorpha	1	Isotomidae	1	Parisotoma	1	Parisotoma_notabilis	1	171	11	84	42	0	0	0	0	0	0	0	0	3	0	0	0	0	4	0	0	8	0	0	0	0	0	0	0	0	48	27	43	120	32
607f90e2f1cb4cbd9e9536da66beba0d8663c534	#N/A	Metazoa	1	Arthropoda	0.98	Collembola	0.96	Entomobryomorpha	0.96	Isotomidae	0.96	Parisotoma	0.96	Parisotoma_notabilis	0.96	3	0	0	0	0	2	0	0	0	0	0	0	0	0	0	0	0	0	0	0	0	0	0	0	0	0	0	0	0	0	0	0	0	0
58d438cf7edb9fec43cc003dc3f3389e307329ff	#N/A	Metazoa	1	Arthropoda	1	Collembola	0.9	Entomobryomorpha	0.9	Isotomidae	0.9	Parisotoma	0.9	Parisotoma_sp	0.9	0	0	0	0	0	0	0	0	0	0	0	0	0	0	0	4	0	0	0	0	0	0	0	0	0	0	0	0	0	0	0	0	0	0
4025d10f9ec74bcf534d66e111041f9fc3a5a5a0	#N/A	Metazoa	1	Arthropoda	0.99	Collembola	0.89	Entomobryomorpha	0.88	Isotomidae	0.85	Parisotoma	0.83	Parisotoma_sp	0.82	0	0	0	7	0	0	0	0	0	0	0	0	0	0	0	0	11	0	0	0	10	0	0	0	0	0	0	0	0	0	0	5	15	8
45154c4c7e46cabb0d605e3aa71adcbd7f3bb171	#N/A	Metazoa	1	Arthropoda	1	Insecta	1	Hemiptera	1	Pemphigidae	1	Pemphigus	1	Pemphigus_bursarius	1	0	0	0	0	0	0	0	0	0	0	0	0	0	0	0	0	0	0	0	0	0	0	0	0	26	0	4	0	16	0	0	0	0	3
b0848160d7782de33a5dbb83b4f1e4048f40b7b7	#N/A	Metazoa	1	Arthropoda	1	Insecta	1	Coleoptera	1	Curculionidae	1	Phyllobius	1	Phyllobius_argentatus	1	0	93	0	0	0	0	0	0	0	0	0	0	0	0	0	0	0	0	0	0	0	0	0	0	0	0	0	0	0	7	0	0	0	0
cf8ab816e6031b61bcc8ce718a6234432b5b937d	#N/A	Metazoa	1	Arthropoda	1	Insecta	1	Diptera	1	Hybotidae	1	Platypalpus	1	Platypalpus_albicornis	1	0	0	0	0	0	0	0	0	0	0	22	0	0	0	0	0	0	0	0	0	0	0	0	0	0	0	0	0	0	0	0	0	0	0
2be26e10c5c6e82b593266e060d9c584847ba684	#N/A	Metazoa	1	Arthropoda	1	Insecta	1	Diptera	1	Hybotidae	0.99	Platypalpus	0.99	Platypalpus_albicornis	0.99	0	0	0	0	0	0	0	0	0	0	2	0	0	0	0	0	0	0	0	0	0	0	0	0	0	0	0	0	0	0	0	0	0	0
1f0a4d9d8330efd98b5c605ab2209350439d2c8e	#N/A	Metazoa	1	Arthropoda	0.92	Insecta	0.92	Diptera	0.9	Hybotidae	0.89	Platypalpus	0.89	Platypalpus_sp	0.89	0	0	0	0	0	0	0	0	0	0	4	0	0	0	0	0	0	0	0	0	0	0	0	0	0	0	0	0	0	0	0	0	0	0
61c13220af0b521fb3a5268a77f22f5c00dccfc5	#N/A	Metazoa	1	Arthropoda	1	Collembola	1	Entomobryomorpha	1	Tomoceridae	1	Pogonognathellus	1	Pogonognathellus_flavescens	0.95	0	0	0	0	0	22	0	7	0	11	0	0	17	31	0	10	5	6	0	0	20	0	0	0	0	0	0	0	3	0	3	5	12	17
217266aa7d53553959e9aeb71e1306217791e26c	#N/A	Metazoa	1	Arthropoda	1	Collembola	1	Entomobryomorpha	1	Tomoceridae	1	Pogonognathellus	1	Pogonognathellus_longicornis	1	0	0	0	0	0	0	0	0	0	0	0	0	9	0	0	0	0	0	0	0	0	0	0	0	0	0	0	0	0	0	0	0	0	0
f9060d18a21cf19152382189912a38253c98cc4e	#N/A	Metazoa	1	Arthropoda	1	Collembola	1	Entomobryomorpha	1	Tomoceridae	1	Pogonognathellus	1	Pogonognathellus_sp	0.93	0	0	0	0	0	0	0	0	0	0	0	0	0	0	0	0	0	0	0	0	0	0	0	0	0	0	0	0	0	8	0	0	0	0
5caf36267e50c9e90bf0a7a8526b7f17a2f7eecd	#N/A	Metazoa	1	Arthropoda	1	Collembola	1	Entomobryomorpha	1	Tomoceridae	1	Pogonognathellus	1	Pogonognathellus_sp	0.86	0	0	0	0	0	0	0	0	0	0	0	0	0	0	0	0	0	0	0	0	0	0	0	0	0	0	0	0	0	0	0	0	0	0
4b0e9b3c94fbf1eba927dc3f0c1fcef40ae4edf8	#N/A	Metazoa	1	Arthropoda	1	Collembola	1	Entomobryomorpha	1	Tomoceridae	1	Pogonognathellus	1	Pogonognathellus_sp	0.83	0	0	0	0	0	0	0	0	0	0	0	0	0	3	0	0	0	0	0	0	0	0	0	0	0	0	0	0	0	0	0	0	0	0
ff225e1f865e36c08ee1a7e251dcce1feb1acebd	#N/A	Metazoa	1	Arthropoda	1	Collembola	1	Entomobryomorpha	1	Tomoceridae	1	Pogonognathellus	1	Pogonognathellus_sp	0.68	0	0	0	0	0	0	0	0	0	0	0	0	0	0	0	0	0	0	0	0	0	0	0	0	0	0	0	0	0	0	0	0	0	0
f5612146619b7e46872e742d4e872c6ac5a77105	#N/A	Metazoa	1	Arthropoda	0.99	Collembola	0.9	Entomobryomorpha	0.88	Tomoceridae	0.88	Pogonognathellus	0.88	Pogonognathellus_sp	0.88	0	0	0	0	0	0	0	0	0	0	0	0	0	0	0	0	322	14	0	0	0	0	0	0	0	0	0	0	0	46	0	0	14	0
8fee073ea0175c6931de487f36a6846ced94563c	#N/A	Metazoa	1	Arthropoda	1	Diplopoda	1	Polydesmida	1	Polydesmidae	1	Polydesmus	1	Polydesmus_denticulatus	1	0	0	0	0	0	0	0	0	0	0	0	0	0	2	0	0	0	3	2	0	0	0	0	0	0	0	0	0	0	0	0	0	0	0
6c57cc4a3283d7b6149b4d11de1435bfc1eb6426	#N/A	Metazoa	1	Arthropoda	1	Collembola	1	Poduromorpha	1	Onychiuridae	1	Protaphorura	1	Protaphorura_armata	1	0	0	0	0	0	0	0	0	0	0	0	0	0	3	0	0	0	0	0	0	0	0	0	0	0	0	0	0	0	0	0	0	0	0
eb3690e4536a9673934fc111e7b613f5d9a47346	#N/A	Metazoa	1	Arthropoda	1	Collembola	1	Poduromorpha	1	Onychiuridae	1	Protaphorura	1	Protaphorura_armata	1	0	0	0	0	0	2	3	0	0	0	0	0	0	34	0	0	0	0	0	0	0	0	0	0	0	0	0	0	0	0	0	0	0	0
c94dd4e3156b0bdfbf1fe8d4ab51e09cd60e2784	#N/A	Metazoa	1	Arthropoda	0.97	Collembola	0.95	Poduromorpha	0.95	Onychiuridae	0.95	Protaphorura	0.93	Protaphorura_sp	0.9	0	0	0	0	0	0	0	0	0	0	0	0	0	2	0	0	0	0	0	0	0	0	0	0	0	0	0	0	0	0	0	0	0	0
85822c67ed9cbd717600c2eeeb15e7ad254b0979	#N/A	Metazoa	1	Arthropoda	1	Insecta	1	Hymenoptera	1	Formicidae	1	Pseudomyrmex	1	Pseudomyrmex_sp	0.73	0	0	0	0	0	0	0	0	0	0	0	0	0	0	0	0	0	0	0	0	0	0	0	0	5	0	0	0	0	0	0	0	0	0
5fae097ff6b2cef8847330d493ffede9333541c7	#N/A	Metazoa	1	Arthropoda	1	Collembola	1	Entomobryomorpha	1	Entomobryidae	1	Pseudosinella	1	Pseudosinella_alba	1	0	0	0	0	0	0	0	0	0	0	0	0	0	0	0	0	0	0	0	0	0	0	0	0	0	0	0	0	0	0	0	0	68	0
d6c8580ba6bab529fab40a5f6e76ceef854e9f22	#N/A	Metazoa	1	Arthropoda	1	Collembola	1	Entomobryomorpha	1	Entomobryidae	1	Pseudosinella	1	Pseudosinella_alba	1	0	0	0	0	0	0	0	0	0	0	0	0	0	0	0	0	0	0	0	0	0	0	0	0	0	0	0	0	0	0	0	0	0	0
ed9eb0dd782590cfb45e82770ef311d1e4f1b7ef	#N/A	Metazoa	1	Arthropoda	1	Collembola	1	Entomobryomorpha	1	Entomobryidae	1	Pseudosinella	1	Pseudosinella_alba	1	0	0	0	0	0	0	0	0	0	0	0	0	0	0	0	0	0	0	0	0	0	0	0	0	0	0	0	0	0	0	0	0	0	0
3e53427f473d212a7bacc78094bda039ccb5efd8	#N/A	Metazoa	1	Arthropoda	1	Insecta	1	Coleoptera	1	Leiodidae	1	Ptomaphagus	1	Ptomaphagus_varicornis	1	0	0	0	0	0	0	0	0	0	0	0	0	0	0	0	0	0	0	0	0	0	0	0	0	0	0	0	0	0	0	0	0	0	0
82ae4df1e48746c4e028a94c064a7348f12784a4	#N/A	Metazoa	1	Mollusca	1	Gastropoda	1	Stylommatophora	1	Punctidae	1	Punctum	1	Punctum_pygmaeum	1	0	0	0	0	0	0	0	0	0	0	0	0	0	0	0	0	0	0	0	0	12	0	0	0	0	0	0	0	0	0	0	0	0	0
da28c562ceb043f5439269937aa46822c12aacaf	#N/A	Metazoa	1	Mollusca	1	Gastropoda	1	Stylommatophora	1	Punctidae	1	Punctum	1	Punctum_sp	0.81	0	0	0	0	0	0	0	0	0	0	0	0	0	0	0	0	0	0	0	0	0	0	0	0	0	0	0	0	0	0	0	0	0	0
388947531160383fd70792cf4e53fc12aaa1f935	#N/A	Metazoa	1	Mollusca	1	Gastropoda	1	Stylommatophora	1	Punctidae	1	Punctum	1	Punctum_sp	0.72	0	0	2	0	2	0	0	0	0	0	0	0	0	0	0	0	0	0	0	4	0	4	0	0	0	0	0	2	0	0	0	36	136	0
29c09a06a1e5762181c568f102142faa47598aa8	#N/A	Metazoa	1	Arthropoda	1	Insecta	1	Hemiptera	1	Aphididae	1	Rhopalosiphum	1	Rhopalosiphum_padi	1	0	0	0	0	0	0	0	0	0	0	0	0	0	0	0	0	0	0	0	0	0	0	0	0	0	0	0	0	0	0	0	0	0	0
bb48ab2b7165885759cc1868020c02c98fbd525e	#N/A	Metazoa	1	Arthropoda	0.99	Arachnida	0.97	Opiliones	0.96	Phalangiidae	0.96	Rilaena	0.96	Rilaena_triangularis	0.96	0	0	0	0	0	0	0	0	0	0	0	0	0	0	0	0	0	0	0	0	0	0	0	0	0	0	0	0	0	0	0	0	0	0
1adf28d17b1a8d755174a70e47c198af7bfb0ab0	#N/A	Metazoa	1	Arthropoda	1	Insecta	1	Coleoptera	1	Curculionidae	1	Sciaphilus	1	Sciaphilus_asperatus	1	0	0	0	0	2	0	0	0	0	0	0	0	2	0	0	0	0	0	0	0	0	0	0	0	0	0	0	0	0	4	0	5	0	2
d6c8936b2f1e8f8120810a645168d24790bf8027	#N/A	Metazoa	1	Arthropoda	1	Insecta	1	Coleoptera	1	Curculionidae	1	Sciaphilus	1	Sciaphilus_asperatus	1	0	0	0	0	0	0	0	0	10	0	0	0	0	0	0	0	0	0	0	0	0	0	0	0	0	0	0	0	0	0	0	0	0	0
c487b54b05885b95604ba1d546a656fe43032893	#N/A	Metazoa	1	Arthropoda	1	Insecta	1	Diptera	1	Dolichopodidae	1	Sciapus	1	Sciapus_platypterus	0.97	0	0	0	0	0	0	0	0	0	0	0	0	0	0	0	0	0	0	0	0	0	0	0	0	0	0	0	0	0	0	0	0	0	0
70be292da1906e0c5b39d5291be644ecf9560560	#N/A	Metazoa	1	Arthropoda	1	Insecta	1	Hemiptera	1	Rhyparochromidae	1	Scolopostethus	1	Scolopostethus_thomsoni	1	0	0	0	0	0	0	0	0	0	0	0	0	0	0	0	0	0	0	0	0	0	0	0	0	0	0	0	0	0	0	0	4	5	0
397a7ca062d6197500da3536104e144e4eb6385d	#N/A	Metazoa	1	Arthropoda	1	Insecta	1	Coleoptera	1	Staphylinidae	1	Sepedophilus	1	Sepedophilus_pedicularius	1	0	0	0	0	0	0	0	0	0	0	0	0	0	0	0	0	0	0	0	0	0	0	0	0	0	0	0	0	0	0	0	0	0	0
65e79ddf503eecb4075904b03483af2ad205246d	#N/A	Metazoa	1	Arthropoda	1	Insecta	1	Coleoptera	0.96	Corylophidae	0.93	Sericoderus	0.93	Sericoderus_sp	0.93	0	0	0	0	0	0	0	0	0	0	0	0	0	0	0	0	0	0	0	0	0	0	0	0	0	0	4	0	0	0	0	0	0	0
9f21e7598f0e0f75bbd1bb72c8fd53c7e6bb2528	#N/A	Metazoa	1	Arthropoda	1	Collembola	0.98	Symphypleona	0.97	Katiannidae	0.97	Sminthurinus	0.97	Sminthurinus_sp	0.82	0	0	0	0	0	0	16	0	7	0	0	0	0	0	0	0	0	0	0	0	0	0	0	0	0	0	0	0	0	0	0	4	0	0
52252220cb773e24097867b94d20ebf15f17e54e	#N/A	Metazoa	1	Arthropoda	1	Collembola	0.85	Symphypleona	0.85	Katiannidae	0.85	Sminthurinus	0.85	Sminthurinus_sp	0.8	0	0	277	1061	259	888	656	1154	77	0	554	0	0	0	0	0	28	0	88	0	0	0	207	0	314	0	0	284	0	33	34	744	23	32
5a7294b1bf9684bb680fc9d27ff1628d1284313a	#N/A	Metazoa	1	Arthropoda	1	Collembola	1	Symphypleona	1	Sminthuridae	1	Sminthurus	1	Sminthurus_viridis	1	0	0	0	0	0	0	0	0	0	0	0	0	0	0	0	0	0	0	0	0	0	0	0	0	0	0	0	5	0	0	0	0	0	0
ccc527c2e5c9b5f539fa0621da1639e2c1da9fdb	#N/A	Metazoa	1	Arthropoda	1	Insecta	1	Diptera	1	Chironomidae	1	Smittia	1	Smittia_stercoraria	1	0	0	0	0	0	0	0	0	0	0	0	0	2	0	0	0	0	0	0	0	0	0	0	35	0	0	2	0	0	0	0	0	0	0
279e3eda973583e1b11da1904e3225a882a480bf	#N/A	Metazoa	1	Arthropoda	1	Collembola	1	Symphypleona	1	Sminthuridae	1	Sphaeridia	1	Sphaeridia_pumilis	1	0	0	0	0	0	0	0	0	0	0	0	0	0	0	0	0	2	3	0	0	0	0	0	0	0	0	0	55	0	0	4	0	4	0
f4ac04dced0c6fb2056a9dac029dd12814e0c9b0	#N/A	Metazoa	1	Arthropoda	1	Insecta	1	Coleoptera	1	Staphylinidae	1	Stenus	1	Stenus_sp	0.82	0	0	0	0	0	0	0	0	0	0	0	0	0	0	0	0	0	4	0	0	63	0	0	0	0	0	0	0	0	0	3	2	3	0
441a05eea7a0da7db46e5765117114bb4912e74d	#N/A	Metazoa	1	Annelida	0.99	Clitellata	0.99	Enchytraeida	0.99	Enchytraeidae	0.99	Stercutus	0.99	Stercutus_niveus	0.99	0	0	0	0	0	0	0	0	0	0	0	0	0	0	0	0	0	0	202	0	0	0	0	0	3	0	0	0	0	0	0	0	0	2
fb26c30a7a04dd44ae195a17c48ec97495d44aee	#N/A	Metazoa	1	Annelida	0.9	Clitellata	0.9	Enchytraeida	0.89	Enchytraeidae	0.89	Stercutus	0.89	Stercutus_sp	0.89	0	0	0	0	2	0	0	0	0	0	0	0	0	0	0	0	0	0	0	0	0	0	0	0	0	0	0	0	0	0	0	0	0	0
f6a8004ab7aa9f870623f3ca14b90636833d2402	#N/A	Metazoa	1	Arthropoda	1	Insecta	1	Coleoptera	1	Staphylinidae	1	Tachinus	1	Tachinus_corticinus	1	0	0	0	0	0	0	0	0	0	0	0	3	0	0	0	0	0	0	0	0	0	0	0	0	0	0	2	0	0	0	0	0	0	0
01e43c6cc03db36ba70a157ba386d90a7b32446b	#N/A	Metazoa	1	Arthropoda	1	Insecta	1	Coleoptera	1	Staphylinidae	1	Tachyporus	1	Tachyporus_dispar	1	0	0	0	0	0	0	0	0	0	0	0	0	0	0	0	0	0	2	0	0	0	0	0	0	0	0	0	0	0	0	0	0	0	0
4642e09d5c338e976bf57716924aced18c05e62a	#N/A	Metazoa	1	Arthropoda	1	Insecta	1	Coleoptera	1	Staphylinidae	1	Tachyporus	1	Tachyporus_dispar	1	0	0	0	0	0	0	0	0	0	0	0	0	2	0	0	0	0	0	0	0	3	0	0	0	0	0	396	0	0	12	7	0	0	5
d00bd3bd22b39901dbead8bc20a5204afa624096	#N/A	Metazoa	1	Arthropoda	1	Insecta	1	Coleoptera	1	Staphylinidae	1	Tachyporus	1	Tachyporus_hypnorum	1	0	0	0	0	0	0	0	0	0	0	0	0	0	0	0	0	0	0	0	0	0	0	0	0	0	0	24	0	0	0	0	0	0	0
d61fd13cc2c0088ed89161792398f057a1a7efc0	#N/A	Metazoa	1	Arthropoda	1	Malacostraca	1	Isopoda	1	Trichoniscidae	1	Trichoniscus	1	Trichoniscus_pusillus	1	0	2	0	10	2	0	3	0	0	0	0	0	2	0	0	0	0	0	0	0	0	0	0	0	0	0	0	0	0	0	0	0	2	305
349e2753fb751afa63056c713aa3645da2943f5a	#N/A	Metazoa	1	Arthropoda	1	Diplopoda	1	Julida	1	Julidae	1	Unciger	1	Unciger_foetidus	1	0	0	0	0	0	0	0	0	0	0	0	0	0	0	0	0	0	0	0	0	0	0	0	0	0	0	0	0	0	0	0	0	0	6
e35fd04876c6b46b90c6af308fb067129e7dee12	#N/A	Metazoa	1	Arthropoda	1	Diplopoda	1	Julida	1	Julidae	1	Unciger	1	Unciger_foetidus	1	0	0	0	0	3	0	0	15	0	0	0	0	0	0	0	0	0	0	0	0	0	0	2	0	0	0	0	0	0	5	3	0	0	68
f250be9e924b38018dd5609d9580c1a72d2ae5e0	#N/A	Metazoa	1	Arthropoda	1	Diplopoda	1	Julida	1	Julidae	1	Unciger	1	Unciger_foetidus	1	0	0	0	0	0	0	0	0	0	0	0	0	0	0	0	0	0	0	0	0	0	0	0	0	0	0	0	0	0	0	0	0	0	0
57d3bf79267fe97656696e53f08505053de92cf8	#N/A	Metazoa	1	Annelida	0.83	unclassified_Annelida	0.77	unclassified_Annelida	0.63	unclassified_Annelida	0.63	unclassified_Annelida	0.57	unclassified_Annelida_sp	0.22	0	0	0	0	0	0	0	0	0	0	0	0	0	0	0	0	0	0	0	0	0	0	0	0	0	0	0	0	0	0	0	0	0	0
30bbefdfc08eb18aeb97160a55e801e88249f775	#N/A	Metazoa	1	Annelida	0.84	unclassified_Annelida	0.77	unclassified_Annelida	0.66	unclassified_Annelida	0.66	unclassified_Annelida	0.53	unclassified_Annelida_sp	0.13	0	0	4	0	0	0	0	0	0	0	0	0	0	0	0	0	0	0	0	0	0	0	0	0	0	0	0	0	0	0	0	0	0	0
4eee516d4117f3c975f8ff6c05bda8ee9eedc563	#N/A	Metazoa	1	Annelida	0.86	unclassified_Annelida	0.79	unclassified_Annelida	0.66	unclassified_Annelida	0.66	unclassified_Annelida	0.48	unclassified_Annelida_sp	0.2	0	0	0	0	0	0	0	0	5	4	7	0	0	0	0	0	14	0	6	0	0	0	0	0	0	0	3	818	4	0	0	5	0	6
8aba77fb05efa355cd35b83f7454f33de0c8dec9	#N/A	Metazoa	1	Annelida	0.81	unclassified_Annelida	0.78	unclassified_Annelida	0.76	unclassified_Annelida	0.76	unclassified_Annelida	0.41	unclassified_Annelida_sp	0.22	0	0	0	0	0	0	0	0	0	0	0	0	0	3	0	0	0	0	0	0	0	0	0	0	0	0	0	21	0	0	0	0	0	0
7872dd9d18dc9290b3d0a261d029ec2af0a77a65	#N/A	Metazoa	1	Arthropoda	1	Insecta	1	Hemiptera	1	Aphididae	0.98	unclassified_Aphididae	0.17	unclassified_Aphididae_sp	0.17	0	0	0	0	0	0	0	0	0	0	0	0	0	0	0	0	0	0	0	0	0	0	0	0	0	0	0	2	0	0	0	0	0	0
ceb19d8fcfb0e9d45229cdf0a853d879f270cd27	#N/A	Metazoa	1	Arthropoda	1	Insecta	1	Hemiptera	1	Aphididae	0.97	unclassified_Aphididae	0.01	unclassified_Aphididae_sp	0.01	0	0	0	0	0	0	0	0	0	0	0	0	0	0	0	0	17	0	0	0	0	0	0	0	0	0	0	0	0	0	0	5	0	0
ab3daa0060c0bedbb094a25d9adca6a9f1d15179	#N/A	Metazoa	1	Arthropoda	0.98	unclassified_Arthropoda	0.78	unclassified_Arthropoda	0.78	unclassified_Arthropoda	0.76	unclassified_Arthropoda	0.76	unclassified_Arthropoda_sp	0.72	0	0	0	0	0	0	0	0	0	0	0	0	0	0	0	0	0	0	0	0	0	0	0	0	0	0	0	0	0	0	0	3	0	0
50edefac875ca9da2bbd5e36670842e6cd8a608c	#N/A	Metazoa	1	Arthropoda	0.92	unclassified_Arthropoda	0.75	unclassified_Arthropoda	0.74	unclassified_Arthropoda	0.74	unclassified_Arthropoda	0.74	unclassified_Arthropoda_sp	0.74	0	0	0	0	0	0	3	0	0	0	0	0	0	0	0	0	0	0	0	0	0	0	0	0	0	0	0	0	0	0	0	0	0	0
858caad96c84df4a3e18055cb023ba5b98959053	#N/A	Metazoa	1	Arthropoda	0.92	unclassified_Arthropoda	0.72	unclassified_Arthropoda	0.71	unclassified_Arthropoda	0.71	unclassified_Arthropoda	0.71	unclassified_Arthropoda_sp	0.58	0	0	0	0	0	0	0	0	0	0	0	0	0	0	0	0	0	0	0	0	0	0	0	0	0	0	0	0	0	2	0	0	0	0
16007e9392a7fdad381eea74cc7ae264e064ff54	#N/A	Metazoa	0.94	Arthropoda	0.91	unclassified_Arthropoda	0.7	unclassified_Arthropoda	0.69	unclassified_Arthropoda	0.69	unclassified_Arthropoda	0.69	unclassified_Arthropoda_sp	0.69	0	0	0	0	2	0	0	0	0	0	0	0	0	0	0	0	0	0	0	0	0	0	0	0	0	0	0	0	0	0	0	0	0	0
409880721eac3decb407b20b2607003614d72a33	#N/A	Metazoa	1	Arthropoda	0.98	unclassified_Arthropoda	0.79	unclassified_Arthropoda	0.7	unclassified_Arthropoda	0.69	unclassified_Arthropoda	0.69	unclassified_Arthropoda_sp	0.23	0	0	0	0	0	0	0	0	0	0	0	12	0	0	0	0	0	0	0	0	2	3	0	0	0	0	0	0	0	0	0	0	0	0
90a509a5091735a1f4b6e7c9a0954de0d58c5989	#N/A	Metazoa	1	Arthropoda	0.93	unclassified_Arthropoda	0.78	unclassified_Arthropoda	0.76	unclassified_Arthropoda	0.7	unclassified_Arthropoda	0.68	unclassified_Arthropoda_sp	0.68	9	0	0	0	0	0	0	0	0	0	0	0	0	0	0	0	0	0	0	0	0	0	0	0	0	0	0	0	0	8	18	0	0	0
7cabe7d3d358a926b5f590800dc7a14d67bb706c	#N/A	Metazoa	0.99	Arthropoda	0.96	unclassified_Arthropoda	0.68	unclassified_Arthropoda	0.68	unclassified_Arthropoda	0.68	unclassified_Arthropoda	0.68	unclassified_Arthropoda_sp	0.33	0	0	0	0	0	0	0	0	0	0	0	0	0	0	0	0	0	0	0	0	0	0	0	0	0	0	0	0	0	0	4	0	0	0
14e79eba24e437a03746bdb44731ec4e37509c14	#N/A	Metazoa	1	Arthropoda	0.94	unclassified_Arthropoda	0.69	unclassified_Arthropoda	0.67	unclassified_Arthropoda	0.67	unclassified_Arthropoda	0.67	unclassified_Arthropoda_sp	0.67	0	0	0	0	0	0	0	43	0	0	0	0	0	0	0	0	0	0	0	0	0	0	0	0	0	0	0	0	0	0	0	52	0	0
8c079fc10fddaedd023f1a8873470a311fe28bb6	#N/A	Metazoa	1	Arthropoda	0.98	unclassified_Arthropoda	0.65	unclassified_Arthropoda	0.64	unclassified_Arthropoda	0.64	unclassified_Arthropoda	0.64	unclassified_Arthropoda_sp	0.64	0	0	0	0	0	0	5	0	0	0	0	0	21	0	0	0	0	0	0	0	0	0	0	0	0	0	0	0	0	0	0	0	0	0
39fd1e07ad03b3c4fdd1b41a5ff6298d0c334cc1	#N/A	Metazoa	1	Arthropoda	0.97	unclassified_Arthropoda	0.71	unclassified_Arthropoda	0.71	unclassified_Arthropoda	0.65	unclassified_Arthropoda	0.63	unclassified_Arthropoda_sp	0.24	13	0	0	0	0	0	0	0	0	0	0	0	0	0	0	0	2	0	0	0	0	0	0	0	0	0	0	0	0	0	0	0	0	0
e3c52390ff90b15e4b6609767a11391301dafe5c	#N/A	Metazoa	0.98	Arthropoda	0.96	unclassified_Arthropoda	0.71	unclassified_Arthropoda	0.66	unclassified_Arthropoda	0.64	unclassified_Arthropoda	0.61	unclassified_Arthropoda_sp	0.57	0	0	0	0	0	0	0	0	0	0	0	0	0	0	0	0	0	0	0	0	0	0	0	0	0	0	0	0	0	0	0	0	0	0
4f385aeac2ba786665eaf7e9586f6d5441f2140c	#N/A	Metazoa	0.95	Arthropoda	0.84	unclassified_Arthropoda	0.75	unclassified_Arthropoda	0.74	unclassified_Arthropoda	0.62	unclassified_Arthropoda	0.61	unclassified_Arthropoda_sp	0.52	0	0	0	0	0	0	0	0	0	0	0	0	0	0	0	0	0	0	0	0	0	5	0	0	0	0	0	0	0	0	0	0	0	0
535092e0fa2f31a73f1d6779237e1bafa50ae00f	#N/A	Metazoa	1	Arthropoda	0.95	unclassified_Arthropoda	0.74	unclassified_Arthropoda	0.68	unclassified_Arthropoda	0.6	unclassified_Arthropoda	0.6	unclassified_Arthropoda_sp	0.6	0	0	0	0	0	0	0	0	0	0	0	0	0	0	0	0	0	0	0	0	0	0	0	0	0	0	0	0	0	0	2	0	0	0
53ee40ae12c0c62d0f575e71ea354af21f243c3d	#N/A	Metazoa	1	Arthropoda	0.94	unclassified_Arthropoda	0.61	unclassified_Arthropoda	0.61	unclassified_Arthropoda	0.61	unclassified_Arthropoda	0.59	unclassified_Arthropoda_sp	0.59	2	0	0	0	0	0	0	0	0	0	0	0	0	0	0	0	0	0	0	0	0	0	0	0	0	0	0	0	0	0	0	0	0	0
762ab988c84d046625e1be3d90524c73c356a14c	#N/A	Metazoa	1	Arthropoda	0.9	unclassified_Arthropoda	0.75	unclassified_Arthropoda	0.59	unclassified_Arthropoda	0.59	unclassified_Arthropoda	0.59	unclassified_Arthropoda_sp	0.59	0	0	0	0	0	0	0	0	0	0	0	0	4	0	0	0	0	0	0	0	0	0	0	0	0	0	0	0	0	0	0	0	0	0
c7fd74cf5a9c3f1d0efb18643de5cfd1708680ff	#N/A	Metazoa	0.99	Arthropoda	0.91	unclassified_Arthropoda	0.65	unclassified_Arthropoda	0.63	unclassified_Arthropoda	0.61	unclassified_Arthropoda	0.59	unclassified_Arthropoda_sp	0.59	0	0	0	0	0	0	0	0	0	0	0	0	0	0	0	0	0	0	0	0	0	0	0	0	0	0	0	0	0	0	0	0	0	0
0ad2b9c41366c4b2df766530b8ebf4e81fdd11b4	#N/A	Metazoa	1	Arthropoda	0.89	unclassified_Arthropoda	0.57	unclassified_Arthropoda	0.57	unclassified_Arthropoda	0.57	unclassified_Arthropoda	0.56	unclassified_Arthropoda_sp	0.56	0	0	0	0	0	0	0	0	0	0	0	0	0	0	0	0	0	0	0	0	0	0	0	0	0	0	0	0	0	0	0	0	0	0
715d05b78e5c30c7ad28cb7a1246062c2e745ae7	#N/A	Metazoa	0.99	Arthropoda	0.91	unclassified_Arthropoda	0.76	unclassified_Arthropoda	0.59	unclassified_Arthropoda	0.56	unclassified_Arthropoda	0.55	unclassified_Arthropoda_sp	0.39	0	0	0	0	0	0	0	0	0	0	0	10	6	0	0	0	0	0	0	0	0	0	0	0	0	0	0	0	0	0	0	0	0	0
728d71eebb36d8fa40d8dbd207e26116ace0f883	#N/A	Metazoa	0.97	Arthropoda	0.95	unclassified_Arthropoda	0.73	unclassified_Arthropoda	0.49	unclassified_Arthropoda	0.49	unclassified_Arthropoda	0.49	unclassified_Arthropoda_sp	0.39	0	0	0	0	0	0	0	0	0	0	0	0	0	0	0	0	0	0	2	0	0	0	0	0	0	0	0	0	0	0	0	0	0	0
73e6b699782ae1e4aa2446fb725055c2f22db72b	#N/A	Metazoa	0.95	Arthropoda	0.91	unclassified_Arthropoda	0.51	unclassified_Arthropoda	0.49	unclassified_Arthropoda	0.49	unclassified_Arthropoda	0.49	unclassified_Arthropoda_sp	0.26	0	0	0	0	0	0	0	0	0	0	0	0	0	0	0	0	0	0	0	0	0	0	0	0	0	0	0	0	0	0	0	0	0	0
72af731273e74cb7bbe1923ae0034c4d0e07dcb8	#N/A	Metazoa	1	Arthropoda	0.9	unclassified_Arthropoda	0.5	unclassified_Arthropoda	0.48	unclassified_Arthropoda	0.48	unclassified_Arthropoda	0.48	unclassified_Arthropoda_sp	0.48	0	0	0	0	0	0	2	0	0	0	0	0	0	0	0	0	0	0	0	0	0	0	0	0	0	0	0	0	0	0	0	0	0	0
7a530cd71a2184936d9eb2a226708b7ac05d3ad2	#N/A	Metazoa	0.93	Arthropoda	0.92	unclassified_Arthropoda	0.64	unclassified_Arthropoda	0.57	unclassified_Arthropoda	0.5	unclassified_Arthropoda	0.47	unclassified_Arthropoda_sp	0.46	0	0	0	0	0	0	0	0	0	0	2	0	0	0	0	0	0	0	0	17	0	0	0	0	0	0	0	0	0	0	0	0	0	0
e364d1e21c60cab303b09fce2be85a44abd4919c	#N/A	Metazoa	1	Arthropoda	0.99	unclassified_Arthropoda	0.62	unclassified_Arthropoda	0.55	unclassified_Arthropoda	0.48	unclassified_Arthropoda	0.47	unclassified_Arthropoda_sp	0.41	0	0	0	0	0	0	0	0	0	0	0	0	0	0	0	0	0	0	0	0	0	0	0	0	0	0	0	0	7	0	0	0	0	0
5dd716d94f3fc2e7c6b0eae376c7f6d07516409d	#N/A	Metazoa	0.99	Arthropoda	0.92	unclassified_Arthropoda	0.53	unclassified_Arthropoda	0.52	unclassified_Arthropoda	0.45	unclassified_Arthropoda	0.45	unclassified_Arthropoda_sp	0.45	0	0	0	0	0	0	0	0	0	0	0	0	0	0	0	0	0	0	0	0	0	0	0	0	0	0	0	0	0	0	0	0	0	0
6e15146ee31304cafda30b46e775318191883249	#N/A	Metazoa	1	Arthropoda	0.91	unclassified_Arthropoda	0.48	unclassified_Arthropoda	0.45	unclassified_Arthropoda	0.43	unclassified_Arthropoda	0.43	unclassified_Arthropoda_sp	0.43	0	0	0	0	0	0	0	0	0	0	0	0	0	0	0	0	0	0	3	0	0	0	0	0	0	0	0	0	0	0	0	0	0	0
1bb935fe1f9366ecb9c950ee050dae0615f415d6	#N/A	Metazoa	0.92	Arthropoda	0.81	unclassified_Arthropoda	0.58	unclassified_Arthropoda	0.5	unclassified_Arthropoda	0.45	unclassified_Arthropoda	0.42	unclassified_Arthropoda_sp	0.42	0	0	0	0	0	0	0	0	0	0	0	0	0	0	0	0	0	0	0	0	0	0	0	0	0	0	0	0	0	0	0	0	0	0
c93e1811873b38db51539dfcfce0d29989710f47	#N/A	Metazoa	0.99	Arthropoda	0.96	unclassified_Arthropoda	0.51	unclassified_Arthropoda	0.49	unclassified_Arthropoda	0.44	unclassified_Arthropoda	0.42	unclassified_Arthropoda_sp	0.4	0	0	0	0	0	0	0	0	0	0	0	0	0	0	0	0	0	0	0	0	0	0	0	0	0	0	2	0	0	0	0	0	0	0
b693e71ed637286ca108eeed3ebeaeb9af6f7061	#N/A	Metazoa	1	Arthropoda	0.89	unclassified_Arthropoda	0.52	unclassified_Arthropoda	0.41	unclassified_Arthropoda	0.41	unclassified_Arthropoda	0.41	unclassified_Arthropoda_sp	0.41	0	0	0	0	0	0	0	2	0	0	0	0	0	0	0	0	0	0	0	0	0	0	0	0	0	0	0	0	0	0	0	0	0	0
c2ad9d3dc4dd95038cc4eeb0c11fd8dec765cdda	#N/A	Metazoa	0.98	Arthropoda	0.94	unclassified_Arthropoda	0.49	unclassified_Arthropoda	0.49	unclassified_Arthropoda	0.39	unclassified_Arthropoda	0.39	unclassified_Arthropoda_sp	0.39	0	0	0	0	0	0	0	0	0	0	0	0	0	0	0	0	0	0	0	0	0	0	0	0	0	0	0	0	0	0	0	4	0	0
ad95664d7d1863f7f2a9e8da0aac50bb34c17cfc	#N/A	Metazoa	1	Arthropoda	0.84	unclassified_Arthropoda	0.47	unclassified_Arthropoda	0.38	unclassified_Arthropoda	0.38	unclassified_Arthropoda	0.38	unclassified_Arthropoda_sp	0.38	0	0	0	0	0	0	0	0	0	0	0	0	0	0	0	0	0	0	0	0	0	0	0	0	0	0	0	0	0	0	0	0	0	0
1f770559c1b7be029fd66b87954da6add555aa2c	#N/A	Metazoa	0.92	Arthropoda	0.81	unclassified_Arthropoda	0.57	unclassified_Arthropoda	0.44	unclassified_Arthropoda	0.36	unclassified_Arthropoda	0.36	unclassified_Arthropoda_sp	0.36	0	0	0	0	0	0	0	0	0	0	0	0	0	0	0	0	0	0	0	0	0	0	0	0	0	0	0	0	0	0	0	0	0	0
9debffd7c6fd750e4b90b501142d935426cc8a17	#N/A	Metazoa	1	Arthropoda	0.88	unclassified_Arthropoda	0.51	unclassified_Arthropoda	0.47	unclassified_Arthropoda	0.36	unclassified_Arthropoda	0.36	unclassified_Arthropoda_sp	0.36	0	0	0	0	0	0	0	0	0	2	0	0	0	0	0	0	62	0	0	0	0	0	2	0	0	0	0	0	0	0	0	0	0	0
871ae85fce7d9440bae73bd7ad60e88893a94a2d	#N/A	Metazoa	1	Arthropoda	0.97	unclassified_Arthropoda	0.36	unclassified_Arthropoda	0.35	unclassified_Arthropoda	0.35	unclassified_Arthropoda	0.35	unclassified_Arthropoda_sp	0.34	0	0	0	0	0	0	0	0	0	0	0	0	0	0	0	0	0	0	0	0	0	0	0	0	0	0	0	0	0	0	0	3	0	0
c7ab3dc073d0866dd83607b8a365d53ab452be65	#N/A	Metazoa	0.98	Arthropoda	0.88	unclassified_Arthropoda	0.61	unclassified_Arthropoda	0.58	unclassified_Arthropoda	0.34	unclassified_Arthropoda	0.34	unclassified_Arthropoda_sp	0.16	0	0	0	0	0	0	0	0	0	0	0	0	0	0	0	0	0	0	0	0	0	0	0	0	0	0	0	0	0	0	0	3	0	0
2ce2f1d9365a2b8ce389a3d4ea98cfd9f15186d2	#N/A	Metazoa	0.99	Arthropoda	0.84	unclassified_Arthropoda	0.33	unclassified_Arthropoda	0.33	unclassified_Arthropoda	0.33	unclassified_Arthropoda	0.33	unclassified_Arthropoda_sp	0.33	0	0	0	4	5	0	0	0	0	0	3	0	0	0	0	5	13	7	0	3	0	781	7	0	0	0	0	0	3	12	6	9	0	0
bc8385fcebddda0acba71c5f760b876dab55eece	#N/A	Metazoa	1	Arthropoda	0.88	unclassified_Arthropoda	0.5	unclassified_Arthropoda	0.45	unclassified_Arthropoda	0.41	unclassified_Arthropoda	0.32	unclassified_Arthropoda_sp	0.32	0	0	0	0	0	0	0	0	0	0	0	0	0	0	0	0	0	0	0	0	0	0	0	0	0	0	0	4	0	0	0	0	0	0
d85a84ef06de6d7b988ac8e2c7e1bfc121fcb110	#N/A	Metazoa	0.99	Arthropoda	0.86	unclassified_Arthropoda	0.74	unclassified_Arthropoda	0.43	unclassified_Arthropoda	0.32	unclassified_Arthropoda	0.32	unclassified_Arthropoda_sp	0.32	0	4	0	0	0	0	0	0	0	0	0	0	0	0	0	0	0	0	0	0	0	0	0	0	0	0	0	0	0	0	0	0	0	0
35be3acf5b576b7f0d638af87dc9887a00a4dc34	#N/A	Metazoa	0.99	Arthropoda	0.84	unclassified_Arthropoda	0.41	unclassified_Arthropoda	0.32	unclassified_Arthropoda	0.3	unclassified_Arthropoda	0.29	unclassified_Arthropoda_sp	0.29	0	0	0	0	0	0	0	0	0	0	0	0	14	0	0	0	0	0	0	0	0	0	0	0	0	0	0	0	0	0	0	0	0	0
55e136f375bf512e9cf8d68036f5894100fc1bd9	#N/A	Metazoa	0.94	Arthropoda	0.86	unclassified_Arthropoda	0.3	unclassified_Arthropoda	0.3	unclassified_Arthropoda	0.29	unclassified_Arthropoda	0.29	unclassified_Arthropoda_sp	0.24	0	0	0	0	0	0	0	0	0	0	0	2	0	0	0	0	0	0	0	0	0	0	0	0	0	0	0	0	0	0	0	0	0	0
76ca12f023d8880b371e85d843f65835162c36b0	#N/A	Metazoa	1	Arthropoda	1	unclassified_Arthropoda	0.78	unclassified_Arthropoda	0.74	unclassified_Arthropoda	0.29	unclassified_Arthropoda	0.29	unclassified_Arthropoda_sp	0.21	0	0	0	0	0	0	0	0	0	0	0	0	4	0	0	0	0	0	0	0	0	0	0	0	0	0	0	0	0	0	0	0	0	0
542186c7bec7f834b079c5f9abba1a9cd37d8e80	#N/A	Metazoa	0.98	Arthropoda	0.85	unclassified_Arthropoda	0.31	unclassified_Arthropoda	0.3	unclassified_Arthropoda	0.3	unclassified_Arthropoda	0.29	unclassified_Arthropoda_sp	0.16	0	0	0	0	0	0	0	0	0	0	0	2	0	0	0	0	0	0	0	0	0	0	0	0	0	0	0	0	0	0	0	0	0	0
84bec05fd2dc39b959c0d93130f6680234b68b83	#N/A	Metazoa	0.97	Arthropoda	0.83	unclassified_Arthropoda	0.41	unclassified_Arthropoda	0.37	unclassified_Arthropoda	0.32	unclassified_Arthropoda	0.27	unclassified_Arthropoda_sp	0.27	0	0	0	0	0	0	0	0	0	0	0	0	0	0	0	0	0	0	0	0	0	0	0	2	0	0	0	0	0	0	0	0	0	0
723078e8312ff12f37776d440074c7133226592f	#N/A	Metazoa	0.99	Arthropoda	0.96	unclassified_Arthropoda	0.69	unclassified_Arthropoda	0.62	unclassified_Arthropoda	0.34	unclassified_Arthropoda	0.27	unclassified_Arthropoda_sp	0.25	40	22	0	83	185	0	0	0	0	0	0	0	0	0	0	0	0	3	0	0	0	2	0	0	0	0	0	0	0	5	0	0	0	35
b5481fc85fc7315a0373a3ffe3dcb0a3b6179f1d	#N/A	Metazoa	0.95	Arthropoda	0.83	unclassified_Arthropoda	0.49	unclassified_Arthropoda	0.29	unclassified_Arthropoda	0.27	unclassified_Arthropoda	0.27	unclassified_Arthropoda_sp	0.25	0	0	0	0	0	0	0	0	0	0	0	0	0	0	0	3	0	0	0	0	0	0	0	0	0	0	0	0	0	0	0	0	0	0
b7f023ac63d45b7be058abb63dd183790832e1cc	#N/A	Metazoa	1	Arthropoda	0.89	unclassified_Arthropoda	0.41	unclassified_Arthropoda	0.38	unclassified_Arthropoda	0.28	unclassified_Arthropoda	0.26	unclassified_Arthropoda_sp	0.26	0	0	0	0	0	0	0	0	0	0	0	0	0	0	0	0	0	0	0	0	0	0	0	0	0	0	0	4	0	0	0	0	0	0
fe8bbf04c27ff5852371cdc4369ff0b804f48494	#N/A	Metazoa	0.97	Arthropoda	0.95	unclassified_Arthropoda	0.54	unclassified_Arthropoda	0.46	unclassified_Arthropoda	0.26	unclassified_Arthropoda	0.26	unclassified_Arthropoda_sp	0.08	0	0	0	0	0	0	0	0	0	0	0	0	0	0	0	0	0	0	0	0	0	0	0	0	0	0	0	0	0	0	0	0	0	0
0b7b991d63ffa659c84762f367d8b0d1355cdd9a	#N/A	Metazoa	1	Arthropoda	0.82	unclassified_Arthropoda	0.27	unclassified_Arthropoda	0.25	unclassified_Arthropoda	0.25	unclassified_Arthropoda	0.25	unclassified_Arthropoda_sp	0.25	0	0	0	0	0	0	0	0	0	0	0	0	40	12	0	14	26	14	161	0	13	127	0	0	0	0	0	0	0	3	0	0	0	0
fd0a8c879934ebbc5dd887c4698d9506be585215	#N/A	Metazoa	0.98	Arthropoda	0.9	unclassified_Arthropoda	0.46	unclassified_Arthropoda	0.41	unclassified_Arthropoda	0.25	unclassified_Arthropoda	0.25	unclassified_Arthropoda_sp	0.24	0	0	22	0	0	0	0	0	0	0	0	0	0	0	0	0	0	0	0	0	0	0	0	2	0	0	0	0	0	0	0	17	0	0
4172e03526269845e21379fe6ddc5606d67bf394	#N/A	Metazoa	0.99	Arthropoda	0.97	unclassified_Arthropoda	0.71	unclassified_Arthropoda	0.64	unclassified_Arthropoda	0.33	unclassified_Arthropoda	0.25	unclassified_Arthropoda_sp	0.23	0	9	0	0	0	0	0	0	0	0	0	0	0	0	0	0	2	0	0	0	0	0	0	0	0	0	0	0	0	0	0	0	0	0
c6f5af0098344b94b97b43097572f10ea87e2505	#N/A	Metazoa	0.99	Arthropoda	0.96	unclassified_Arthropoda	0.29	unclassified_Arthropoda	0.27	unclassified_Arthropoda	0.24	unclassified_Arthropoda	0.24	unclassified_Arthropoda_sp	0.21	0	0	0	0	0	0	0	0	0	0	0	0	0	0	0	0	0	0	0	0	0	15	0	0	0	0	0	0	0	0	0	0	0	0
8069c17258aaf1b673e397792b75078706824d25	#N/A	Metazoa	0.99	Arthropoda	0.94	unclassified_Arthropoda	0.57	unclassified_Arthropoda	0.52	unclassified_Arthropoda	0.29	unclassified_Arthropoda	0.24	unclassified_Arthropoda_sp	0.17	10	0	8	0	0	0	0	0	0	0	0	0	4	0	0	0	0	3	0	0	3	0	5	0	0	0	0	0	0	7	0	55	29	0
0657b4a3c03ca1c4bcad4bd5619f95df47c98612	#N/A	Metazoa	0.97	Arthropoda	0.85	unclassified_Arthropoda	0.33	unclassified_Arthropoda	0.31	unclassified_Arthropoda	0.23	unclassified_Arthropoda	0.23	unclassified_Arthropoda_sp	0.23	0	0	0	0	0	0	0	0	0	0	0	0	0	0	0	0	3	0	0	0	0	0	0	0	0	0	0	0	0	0	0	0	0	0
51b8aabae987443f2257d5c155d6da66001edf11	#N/A	Metazoa	0.93	Arthropoda	0.87	unclassified_Arthropoda	0.34	unclassified_Arthropoda	0.31	unclassified_Arthropoda	0.23	unclassified_Arthropoda	0.23	unclassified_Arthropoda_sp	0.23	0	0	0	0	0	0	0	0	0	0	0	0	0	0	0	0	0	0	0	0	0	0	0	0	0	3	0	0	0	0	0	0	0	0
e960af7df040757fcd14378ef5265765e93b8c67	#N/A	Metazoa	0.89	Arthropoda	0.83	unclassified_Arthropoda	0.58	unclassified_Arthropoda	0.51	unclassified_Arthropoda	0.23	unclassified_Arthropoda	0.23	unclassified_Arthropoda_sp	0.15	0	0	0	0	0	0	0	0	0	0	0	12	0	0	0	0	0	0	0	0	0	0	0	0	0	0	0	0	0	0	0	0	0	0
d9d9bfc293801a5b1d97543c50107726f3686ffb	#N/A	Metazoa	0.9	Arthropoda	0.82	unclassified_Arthropoda	0.47	unclassified_Arthropoda	0.29	unclassified_Arthropoda	0.23	unclassified_Arthropoda	0.23	unclassified_Arthropoda_sp	0.08	0	0	2	0	0	0	0	0	0	0	0	0	0	0	0	0	4	0	0	0	0	0	0	0	0	0	0	0	0	0	2	0	0	8
36c5970e1efe2224732b3bcb3b923108c5b7377b	#N/A	Metazoa	1	Arthropoda	0.88	unclassified_Arthropoda	0.31	unclassified_Arthropoda	0.23	unclassified_Arthropoda	0.22	unclassified_Arthropoda	0.22	unclassified_Arthropoda_sp	0.22	0	0	0	0	0	2	0	0	0	0	0	0	0	0	0	0	0	0	0	0	0	0	0	0	0	0	0	0	0	0	0	0	0	0
ccea29f37633fa80026ce329acdc303c7ccab820	#N/A	Metazoa	0.98	Arthropoda	0.97	unclassified_Arthropoda	0.31	unclassified_Arthropoda	0.28	unclassified_Arthropoda	0.22	unclassified_Arthropoda	0.22	unclassified_Arthropoda_sp	0.22	0	0	0	0	0	0	0	0	0	0	0	0	0	0	0	0	0	0	0	0	0	0	0	0	0	5	0	0	0	0	0	0	0	0
3aa55fabac6229a06ac601104d83aac3b6a1e2e4	#N/A	Metazoa	1	Arthropoda	0.95	unclassified_Arthropoda	0.78	unclassified_Arthropoda	0.36	unclassified_Arthropoda	0.27	unclassified_Arthropoda	0.22	unclassified_Arthropoda_sp	0.13	0	0	0	0	0	0	0	0	0	0	0	0	0	0	0	0	0	0	0	0	0	0	0	0	0	0	0	0	0	0	2	0	0	0
54b88a1b837f3439f847c187eb4e384363390a18	#N/A	Metazoa	0.95	Arthropoda	0.93	unclassified_Arthropoda	0.64	unclassified_Arthropoda	0.44	unclassified_Arthropoda	0.21	unclassified_Arthropoda	0.21	unclassified_Arthropoda_sp	0.14	0	0	0	0	0	0	0	0	0	0	0	0	0	0	0	0	0	0	0	0	0	0	0	0	0	0	0	0	0	0	0	0	0	0
c148ad177e77b05ed23e5a6edd6c9a3e83f68783	#N/A	Metazoa	0.91	Arthropoda	0.84	unclassified_Arthropoda	0.71	unclassified_Arthropoda	0.65	unclassified_Arthropoda	0.19	unclassified_Arthropoda	0.19	unclassified_Arthropoda_sp	0.15	0	0	0	0	0	2	0	0	0	0	0	0	0	0	0	0	0	0	0	0	0	0	0	0	0	0	0	0	0	0	0	0	0	0
521734e4d83e67fcb34e4791feca268a1724d3de	#N/A	Metazoa	0.94	Arthropoda	0.87	unclassified_Arthropoda	0.73	unclassified_Arthropoda	0.42	unclassified_Arthropoda	0.18	unclassified_Arthropoda	0.18	unclassified_Arthropoda_sp	0.12	0	0	0	0	0	0	0	0	0	0	0	0	0	0	0	0	0	0	0	0	0	0	0	0	4	0	0	0	0	0	0	0	0	0
b4363d57211aff1944150dee3dd0a247a4f5b621	#N/A	Metazoa	1	Arthropoda	0.91	unclassified_Arthropoda	0.46	unclassified_Arthropoda	0.46	unclassified_Arthropoda	0.44	unclassified_Arthropoda	0.17	unclassified_Arthropoda_sp	0.17	13	0	0	0	0	0	0	0	0	0	0	0	0	0	0	0	0	0	0	0	0	0	0	0	0	0	0	0	0	0	0	0	0	0
81dd2d87cc3621a30ec5606126f7aad926be0f7f	#N/A	Metazoa	1	Arthropoda	0.95	unclassified_Arthropoda	0.65	unclassified_Arthropoda	0.57	unclassified_Arthropoda	0.17	unclassified_Arthropoda	0.17	unclassified_Arthropoda_sp	0.09	5	0	0	0	0	0	0	0	0	0	0	0	0	0	0	0	0	0	0	0	0	0	0	0	0	0	0	0	0	0	0	0	0	0
7865cfa00ba2749d328218d9c9235421ded617d6	#N/A	Metazoa	1	Arthropoda	0.86	unclassified_Arthropoda	0.33	unclassified_Arthropoda	0.33	unclassified_Arthropoda	0.32	unclassified_Arthropoda	0.16	unclassified_Arthropoda_sp	0.16	0	0	0	0	0	0	0	0	0	0	0	0	0	2	0	0	7	0	0	23	0	0	0	0	0	0	0	0	0	0	0	0	0	0
d31e9c1d106ec51248b207f672d50bad356f9ec5	#N/A	Metazoa	1	Arthropoda	0.94	unclassified_Arthropoda	0.46	unclassified_Arthropoda	0.42	unclassified_Arthropoda	0.16	unclassified_Arthropoda	0.16	unclassified_Arthropoda_sp	0.11	0	0	0	0	0	0	0	0	0	0	0	0	0	0	0	0	0	0	0	0	0	7	0	0	0	0	0	0	0	0	0	0	0	0
98fda5eec34b74a3e1b98103e88791df32d724b6	#N/A	Metazoa	0.98	Arthropoda	0.89	unclassified_Arthropoda	0.49	unclassified_Arthropoda	0.24	unclassified_Arthropoda	0.15	unclassified_Arthropoda	0.15	unclassified_Arthropoda_sp	0.15	0	0	0	0	0	0	0	0	0	0	0	0	0	0	0	0	0	0	0	0	0	0	0	0	0	0	0	0	0	0	0	0	0	0
f591ff5342d43d2a722a0085b14cfd4e4d8538eb	#N/A	Metazoa	1	Arthropoda	0.86	unclassified_Arthropoda	0.17	unclassified_Arthropoda	0.15	unclassified_Arthropoda	0.15	unclassified_Arthropoda	0.15	unclassified_Arthropoda_sp	0.15	0	0	0	0	0	0	0	0	0	0	0	0	0	0	0	0	0	0	0	0	0	0	0	0	0	0	0	0	0	0	0	0	0	0
0c53bcb45662bf99d633a3ad48b698fbf23d1c92	#N/A	Metazoa	1	Arthropoda	0.93	unclassified_Arthropoda	0.69	unclassified_Arthropoda	0.3	unclassified_Arthropoda	0.16	unclassified_Arthropoda	0.14	unclassified_Arthropoda_sp	0.14	0	0	0	0	0	0	0	0	0	0	0	0	0	0	0	0	0	0	0	0	0	0	0	0	0	0	0	0	0	0	0	0	0	0
b87171b0be8a4ceb1dad53abc4f6f8a9b1e594ef	#N/A	Metazoa	0.99	Arthropoda	0.91	unclassified_Arthropoda	0.38	unclassified_Arthropoda	0.25	unclassified_Arthropoda	0.15	unclassified_Arthropoda	0.14	unclassified_Arthropoda_sp	0.14	0	0	3	0	0	0	0	0	0	0	0	0	0	0	0	0	0	0	0	0	0	0	0	0	0	0	0	0	0	0	0	4	0	0
092fe61a871f24dd70a815ffe6e9989981a2a560	#N/A	Metazoa	0.96	Arthropoda	0.84	unclassified_Arthropoda	0.42	unclassified_Arthropoda	0.29	unclassified_Arthropoda	0.16	unclassified_Arthropoda	0.14	unclassified_Arthropoda_sp	0.07	0	0	0	0	0	0	0	0	0	0	0	0	0	0	0	0	0	0	0	0	0	0	0	0	0	0	0	0	5	0	0	0	0	0
459d276ab29a4b29c21b123e99508893265c5c53	#N/A	Metazoa	0.99	Arthropoda	0.9	unclassified_Arthropoda	0.54	unclassified_Arthropoda	0.47	unclassified_Arthropoda	0.14	unclassified_Arthropoda	0.13	unclassified_Arthropoda_sp	0.13	0	0	0	0	0	0	0	0	0	0	0	0	0	0	0	0	3	0	0	2	0	0	0	0	0	0	0	0	0	0	7	5	0	0
2536a2ef61a5df3ef77c69bccb8f9d113c2b1261	#N/A	Metazoa	1	Arthropoda	0.88	unclassified_Arthropoda	0.65	unclassified_Arthropoda	0.21	unclassified_Arthropoda	0.12	unclassified_Arthropoda	0.12	unclassified_Arthropoda_sp	0.11	0	0	0	0	0	0	0	0	0	0	0	0	0	0	0	0	0	0	0	0	0	0	0	0	0	0	0	0	0	0	0	2	0	0
663a6969f576c3b9bc018f7f0925320cfaa584fb	#N/A	Metazoa	1	Arthropoda	0.94	unclassified_Arthropoda	0.42	unclassified_Arthropoda	0.35	unclassified_Arthropoda	0.12	unclassified_Arthropoda	0.11	unclassified_Arthropoda_sp	0.11	0	0	0	0	0	0	0	0	0	0	0	2	335	0	0	0	0	0	0	0	0	0	0	0	0	0	0	0	0	0	0	0	0	0
c4640a197551d1198019d5a39601e5b1b7e42b97	#N/A	Metazoa	1	Arthropoda	0.86	unclassified_Arthropoda	0.24	unclassified_Arthropoda	0.12	unclassified_Arthropoda	0.11	unclassified_Arthropoda	0.11	unclassified_Arthropoda_sp	0.11	0	0	0	0	0	0	0	0	0	0	0	0	0	0	0	0	0	0	0	0	0	0	0	0	0	0	0	0	0	0	0	0	0	4
f9fe2fb0386451fa7a38a5f300ddc9a24854cfc9	#N/A	Metazoa	0.98	Arthropoda	0.82	unclassified_Arthropoda	0.37	unclassified_Arthropoda	0.2	unclassified_Arthropoda	0.11	unclassified_Arthropoda	0.11	unclassified_Arthropoda_sp	0.11	0	0	0	0	0	0	0	0	0	0	0	0	0	0	0	0	0	0	0	4	0	0	0	0	0	0	0	0	0	0	0	0	0	0
b756451d6baf986c38311f7998ed7c15686a9c41	#N/A	Metazoa	1	Arthropoda	0.96	unclassified_Arthropoda	0.28	unclassified_Arthropoda	0.24	unclassified_Arthropoda	0.22	unclassified_Arthropoda	0.11	unclassified_Arthropoda_sp	0.1	0	0	0	0	0	0	0	6	0	0	3	0	380	5	5	0	140	8	0	0	7	4	5	0	0	0	0	2	0	8	0	4	9	6
a92a1c303627a59e277badee83a098959c173a5b	#N/A	Metazoa	0.99	Arthropoda	0.82	unclassified_Arthropoda	0.71	unclassified_Arthropoda	0.54	unclassified_Arthropoda	0.11	unclassified_Arthropoda	0.11	unclassified_Arthropoda_sp	0.06	0	0	0	0	0	0	0	0	0	0	0	0	0	0	0	0	0	4	0	0	0	0	0	0	0	0	0	0	0	0	0	0	0	0
030553962a154a3e3e493d156b5725656fcd9cb7	#N/A	Metazoa	1	Arthropoda	0.91	unclassified_Arthropoda	0.79	unclassified_Arthropoda	0.34	unclassified_Arthropoda	0.1	unclassified_Arthropoda	0.1	unclassified_Arthropoda_sp	0.1	0	0	0	0	0	0	0	0	0	0	0	0	0	0	0	0	0	0	0	0	0	0	0	0	0	0	0	0	0	0	0	0	0	0
040b5fe613aaba613a0be2d4027138af7e6f8b57	#N/A	Metazoa	0.99	Arthropoda	0.8	unclassified_Arthropoda	0.15	unclassified_Arthropoda	0.1	unclassified_Arthropoda	0.1	unclassified_Arthropoda	0.1	unclassified_Arthropoda_sp	0.1	0	0	0	0	0	0	0	0	0	0	0	0	0	0	0	0	0	0	0	0	0	0	0	0	0	0	0	0	0	0	0	0	0	0
1b9f44763a310fff428f58364afd420608ef09a0	#N/A	Metazoa	0.99	Arthropoda	0.94	unclassified_Arthropoda	0.17	unclassified_Arthropoda	0.14	unclassified_Arthropoda	0.1	unclassified_Arthropoda	0.1	unclassified_Arthropoda_sp	0.1	0	0	0	0	0	0	0	0	0	0	0	0	0	0	0	0	3	0	5	0	0	0	10	0	0	0	0	0	0	0	0	0	0	0
2ad702a92f20a9494c981a847bb3b14b94765019	#N/A	Metazoa	1	Arthropoda	1	unclassified_Arthropoda	0.33	unclassified_Arthropoda	0.22	unclassified_Arthropoda	0.1	unclassified_Arthropoda	0.1	unclassified_Arthropoda_sp	0.1	0	0	0	0	0	0	0	3	0	0	5	0	0	0	0	0	0	0	0	0	76	4	0	0	0	0	0	0	0	5	0	0	0	0
51cf513bc744f88033d1049f3fee9a33aa3d6600	#N/A	Metazoa	0.96	Arthropoda	0.83	unclassified_Arthropoda	0.53	unclassified_Arthropoda	0.22	unclassified_Arthropoda	0.12	unclassified_Arthropoda	0.1	unclassified_Arthropoda_sp	0.1	0	0	0	0	0	0	0	0	0	0	0	0	0	0	0	0	0	0	0	40	2	0	0	0	0	0	0	0	0	2	0	0	0	0
63a47100a565718ee316007cdd864a7501c20008	#N/A	Metazoa	0.89	Arthropoda	0.8	unclassified_Arthropoda	0.67	unclassified_Arthropoda	0.14	unclassified_Arthropoda	0.1	unclassified_Arthropoda	0.1	unclassified_Arthropoda_sp	0.1	0	0	0	0	0	0	0	0	0	0	0	0	0	0	0	0	0	0	0	0	0	0	0	0	0	0	0	0	0	0	0	4	0	0
74d2acc968ba5a857f5920d80ca87fb711834e1b	#N/A	Metazoa	1	Arthropoda	0.96	unclassified_Arthropoda	0.5	unclassified_Arthropoda	0.15	unclassified_Arthropoda	0.1	unclassified_Arthropoda	0.1	unclassified_Arthropoda_sp	0.1	0	0	0	0	0	0	0	0	0	0	0	0	0	0	0	0	0	0	0	0	0	0	0	0	0	0	0	0	0	0	0	0	0	0
8b16204dd732ecdabb5f85e0b2695412d22d5610	#N/A	Metazoa	0.97	Arthropoda	0.85	unclassified_Arthropoda	0.44	unclassified_Arthropoda	0.4	unclassified_Arthropoda	0.1	unclassified_Arthropoda	0.1	unclassified_Arthropoda_sp	0.1	0	0	0	0	0	0	0	0	0	0	0	0	0	0	0	0	0	0	0	0	0	0	0	0	0	0	0	0	0	0	0	0	0	0
afbdb31bb4356b2fdeb6e184f3eb5fcae8576878	#N/A	Metazoa	0.91	Arthropoda	0.83	unclassified_Arthropoda	0.27	unclassified_Arthropoda	0.21	unclassified_Arthropoda	0.11	unclassified_Arthropoda	0.1	unclassified_Arthropoda_sp	0.1	0	0	0	0	0	0	0	0	0	0	0	0	0	0	0	0	0	0	0	0	0	0	0	0	0	0	0	5	0	0	0	0	0	0
e1de9f7067a3747f06356fd3a0f5940e1b8bb642	#N/A	Metazoa	1	Arthropoda	0.85	unclassified_Arthropoda	0.25	unclassified_Arthropoda	0.15	unclassified_Arthropoda	0.11	unclassified_Arthropoda	0.1	unclassified_Arthropoda_sp	0.1	0	0	0	0	0	0	0	0	0	0	0	0	0	0	0	2	0	0	0	0	0	0	0	0	0	0	0	0	0	0	0	0	0	0
f76565c659de1187a0f12f0277f8cf799a1db367	#N/A	Metazoa	0.98	Arthropoda	0.83	unclassified_Arthropoda	0.72	unclassified_Arthropoda	0.16	unclassified_Arthropoda	0.1	unclassified_Arthropoda	0.1	unclassified_Arthropoda_sp	0.1	0	0	0	0	0	0	0	0	0	0	0	0	0	0	0	0	0	0	0	0	0	0	0	0	0	0	0	0	0	2	0	0	0	0
87c59de3cad4192d27c28bc8b51763113c31457c	#N/A	Metazoa	0.98	Arthropoda	0.92	unclassified_Arthropoda	0.6	unclassified_Arthropoda	0.11	unclassified_Arthropoda	0.11	unclassified_Arthropoda	0.1	unclassified_Arthropoda_sp	0.09	0	0	0	0	0	0	0	0	0	0	0	0	0	0	0	0	0	0	0	0	0	0	0	0	0	0	0	0	0	0	0	0	0	0
768225c54f2f020325c1f330dee29da5b8863b02	#N/A	Metazoa	1	Arthropoda	0.92	unclassified_Arthropoda	0.72	unclassified_Arthropoda	0.59	unclassified_Arthropoda	0.1	unclassified_Arthropoda	0.1	unclassified_Arthropoda_sp	0.07	0	0	0	0	0	0	0	0	0	0	0	0	0	0	0	0	0	0	0	6	0	0	0	0	0	0	0	0	0	0	0	0	18	0
be43abd3ba821592aa25522c440080df4b97fa90	#N/A	Metazoa	1	Arthropoda	0.98	unclassified_Arthropoda	0.31	unclassified_Arthropoda	0.1	unclassified_Arthropoda	0.1	unclassified_Arthropoda	0.1	unclassified_Arthropoda_sp	0.05	3	0	0	0	0	0	0	2	0	0	0	2	0	0	0	0	0	13	0	0	0	0	5	0	0	0	0	3	0	0	0	0	0	8
8ada308837c2ffdbfb7c6f90c1c9550b98f77ea5	#N/A	Metazoa	1	Arthropoda	0.98	unclassified_Arthropoda	0.36	unclassified_Arthropoda	0.26	unclassified_Arthropoda	0.1	unclassified_Arthropoda	0.1	unclassified_Arthropoda_sp	0.02	0	0	0	0	0	0	0	0	0	0	0	0	0	0	0	0	0	0	0	0	0	0	0	0	0	0	0	0	0	0	0	0	0	0
21ff616e758caf10ab752e2874ff551604198b28	#N/A	Metazoa	0.99	Arthropoda	0.8	unclassified_Arthropoda	0.72	unclassified_Arthropoda	0.28	unclassified_Arthropoda	0.1	unclassified_Arthropoda	0.09	unclassified_Arthropoda_sp	0.09	0	0	0	0	0	0	0	0	0	0	0	0	0	0	0	0	0	0	0	0	0	0	0	0	0	0	0	0	0	0	2	0	0	0
651e15176e7b5632104c567f21e0bc0d09ffd606	#N/A	Metazoa	1	Arthropoda	0.86	unclassified_Arthropoda	0.22	unclassified_Arthropoda	0.1	unclassified_Arthropoda	0.09	unclassified_Arthropoda	0.09	unclassified_Arthropoda_sp	0.09	0	0	0	0	0	0	0	0	0	0	0	0	0	0	0	0	0	0	0	0	0	0	4	0	0	0	0	0	0	0	0	2	0	0
96ddb6d59fc23fa9726f7a179ce67802cc4c97a0	#N/A	Metazoa	0.91	Arthropoda	0.8	unclassified_Arthropoda	0.56	unclassified_Arthropoda	0.47	unclassified_Arthropoda	0.09	unclassified_Arthropoda	0.09	unclassified_Arthropoda_sp	0.09	0	0	0	0	0	0	0	0	0	0	0	0	0	0	0	0	0	0	0	0	0	0	0	0	0	0	0	2	0	0	0	0	0	0
9f47b8b8a6bb6e8f1de27dcb8cf0616bf66043fd	#N/A	Metazoa	1	Arthropoda	0.82	unclassified_Arthropoda	0.14	unclassified_Arthropoda	0.13	unclassified_Arthropoda	0.09	unclassified_Arthropoda	0.09	unclassified_Arthropoda_sp	0.09	0	0	0	0	0	0	0	0	0	0	0	0	3	0	0	0	0	0	0	0	0	0	0	0	0	0	0	0	0	0	0	0	0	0
ad80ba235cf6162a63c32fb2491f14eeb5f44d5a	#N/A	Metazoa	1	Arthropoda	0.89	unclassified_Arthropoda	0.28	unclassified_Arthropoda	0.14	unclassified_Arthropoda	0.09	unclassified_Arthropoda	0.09	unclassified_Arthropoda_sp	0.09	0	0	0	0	0	0	0	0	0	0	0	0	0	0	0	0	0	0	0	0	0	0	0	0	2	0	0	0	0	0	0	0	0	0
d2150edbf35bce64cc97f12790bb1e2756a09e22	#N/A	Metazoa	1	Arthropoda	0.84	unclassified_Arthropoda	0.66	unclassified_Arthropoda	0.1	unclassified_Arthropoda	0.09	unclassified_Arthropoda	0.09	unclassified_Arthropoda_sp	0.09	0	0	0	0	0	0	0	0	0	0	0	0	0	0	0	0	0	0	0	0	3	0	0	0	0	0	0	0	0	0	0	0	0	0
b66c80aa8ed11fc787749516003722645cf51aee	#N/A	Metazoa	0.98	Arthropoda	0.81	unclassified_Arthropoda	0.36	unclassified_Arthropoda	0.21	unclassified_Arthropoda	0.17	unclassified_Arthropoda	0.09	unclassified_Arthropoda_sp	0.08	0	0	0	0	0	0	0	0	0	0	0	0	0	6	0	0	0	0	0	0	0	0	0	0	0	0	0	0	0	5	0	13	0	0
ea5db568362f2ef9e5785eb3703dae200b3e5dc3	#N/A	Metazoa	1	Arthropoda	0.83	unclassified_Arthropoda	0.28	unclassified_Arthropoda	0.09	unclassified_Arthropoda	0.09	unclassified_Arthropoda	0.09	unclassified_Arthropoda_sp	0.08	0	0	0	0	0	0	0	0	0	0	0	2	0	0	0	0	0	0	0	0	0	0	0	0	0	0	0	0	0	0	11	5	31	10
995e5d2ec3e97d360932f60ef52fef74a34998ff	#N/A	Metazoa	1	Arthropoda	0.81	unclassified_Arthropoda	0.46	unclassified_Arthropoda	0.31	unclassified_Arthropoda	0.19	unclassified_Arthropoda	0.09	unclassified_Arthropoda_sp	0.07	7	0	0	0	0	14	0	0	0	0	0	0	0	0	0	0	0	0	0	0	0	0	0	0	0	0	0	0	0	0	0	0	0	0
c0e6af658b813534b46fc93f032091ff13504e66	#N/A	Metazoa	0.99	Arthropoda	0.98	unclassified_Arthropoda	0.52	unclassified_Arthropoda	0.41	unclassified_Arthropoda	0.1	unclassified_Arthropoda	0.09	unclassified_Arthropoda_sp	0.06	0	0	0	3	0	0	0	0	0	0	0	0	0	0	0	0	0	0	0	0	0	0	0	0	0	0	0	0	0	0	0	0	0	0
93972f148a68c81de10d04e2796c84ebc43d4fa2	#N/A	Metazoa	0.99	Arthropoda	0.95	unclassified_Arthropoda	0.58	unclassified_Arthropoda	0.46	unclassified_Arthropoda	0.33	unclassified_Arthropoda	0.09	unclassified_Arthropoda_sp	0.05	0	0	0	0	0	0	0	0	0	0	0	0	0	0	0	3	0	0	0	0	0	0	0	0	0	0	0	0	0	0	0	2	0	0
0807b2d8a3aa83b21c8dc33c134306357ee3476f	#N/A	Metazoa	0.91	Arthropoda	0.83	unclassified_Arthropoda	0.25	unclassified_Arthropoda	0.08	unclassified_Arthropoda	0.08	unclassified_Arthropoda	0.08	unclassified_Arthropoda_sp	0.08	0	0	0	0	0	0	0	0	0	0	0	0	0	0	0	0	0	0	0	0	0	0	0	0	0	0	0	0	0	0	0	0	0	0
5dd64a7fee20ab7e2afb2f9cc671f36a7dbbc971	#N/A	Metazoa	0.99	Arthropoda	0.91	unclassified_Arthropoda	0.61	unclassified_Arthropoda	0.54	unclassified_Arthropoda	0.13	unclassified_Arthropoda	0.08	unclassified_Arthropoda_sp	0.08	0	0	0	0	0	0	0	0	0	0	0	0	0	0	0	0	5	0	0	0	0	0	0	0	0	0	0	0	0	0	0	0	0	0
6b5a1f17b563bade2754d93fa9d52d34912be7d1	#N/A	Metazoa	0.98	Arthropoda	0.94	unclassified_Arthropoda	0.76	unclassified_Arthropoda	0.09	unclassified_Arthropoda	0.09	unclassified_Arthropoda	0.08	unclassified_Arthropoda_sp	0.08	0	0	0	0	0	0	0	0	0	0	0	10	0	0	0	0	0	3	0	0	0	0	0	0	0	0	0	0	0	0	0	0	0	0
8171af11ba7f024a4e8c5de30a8ca700738b290a	#N/A	Metazoa	1	Arthropoda	0.85	unclassified_Arthropoda	0.67	unclassified_Arthropoda	0.31	unclassified_Arthropoda	0.13	unclassified_Arthropoda	0.08	unclassified_Arthropoda_sp	0.08	0	0	0	0	0	0	0	0	0	0	0	0	0	0	0	0	0	0	0	3	0	0	0	0	0	0	0	0	0	0	0	0	0	0
d9295d3816e3f81b851cdafa727adec92423ee44	#N/A	Metazoa	0.94	Arthropoda	0.81	unclassified_Arthropoda	0.6	unclassified_Arthropoda	0.11	unclassified_Arthropoda	0.08	unclassified_Arthropoda	0.08	unclassified_Arthropoda_sp	0.08	0	0	0	0	0	0	0	0	0	0	0	0	0	0	0	0	8	0	0	0	0	0	2	0	0	0	0	159	0	6	5	3	6	0
df8fdddf3b0c1c1c469c8f827f6be9a0557157bf	#N/A	Metazoa	0.97	Arthropoda	0.82	unclassified_Arthropoda	0.32	unclassified_Arthropoda	0.1	unclassified_Arthropoda	0.08	unclassified_Arthropoda	0.08	unclassified_Arthropoda_sp	0.08	0	0	0	17	0	0	0	8	0	0	7	0	51	0	11	0	964	13	0	20	14	11	0	0	0	0	7	11	0	224	12	6	471	85
f279365f3dd0ee9205d8cb9dfbefbd4621ae5d6e	#N/A	Metazoa	1	Arthropoda	0.88	unclassified_Arthropoda	0.59	unclassified_Arthropoda	0.55	unclassified_Arthropoda	0.31	unclassified_Arthropoda	0.08	unclassified_Arthropoda_sp	0.08	0	0	0	0	0	0	0	0	0	0	0	0	0	0	0	0	0	0	0	0	0	0	0	0	0	0	0	0	0	0	0	0	0	0
9622b6f7ce8f9cf03ee7678a15aca7d4e313d1a6	#N/A	Metazoa	0.83	Arthropoda	0.8	unclassified_Arthropoda	0.67	unclassified_Arthropoda	0.27	unclassified_Arthropoda	0.09	unclassified_Arthropoda	0.08	unclassified_Arthropoda_sp	0.06	0	0	0	0	0	0	0	0	0	0	0	0	0	0	0	0	0	0	0	0	0	0	0	0	0	0	0	0	0	0	0	0	0	0
1811d0ebc3c006a0a1d3f1263862816f9540cd29	#N/A	Metazoa	0.99	Arthropoda	0.85	unclassified_Arthropoda	0.52	unclassified_Arthropoda	0.17	unclassified_Arthropoda	0.1	unclassified_Arthropoda	0.07	unclassified_Arthropoda_sp	0.07	0	0	0	0	0	0	0	0	0	0	2	0	0	0	0	0	38	0	0	0	0	0	0	0	0	0	0	0	0	0	0	0	0	0
212d5c0c6388e8aa415a267c9897c2c8fec1b8bd	#N/A	Metazoa	0.98	Arthropoda	0.89	unclassified_Arthropoda	0.26	unclassified_Arthropoda	0.15	unclassified_Arthropoda	0.07	unclassified_Arthropoda	0.07	unclassified_Arthropoda_sp	0.07	0	0	2	0	0	0	0	0	0	6	0	3	0	0	0	0	0	0	0	0	3	0	0	0	0	0	0	0	0	5	0	0	0	0
3ad6c337bb82844c2af5cd046af564dbb0205a40	#N/A	Metazoa	1	Arthropoda	0.89	unclassified_Arthropoda	0.71	unclassified_Arthropoda	0.35	unclassified_Arthropoda	0.31	unclassified_Arthropoda	0.07	unclassified_Arthropoda_sp	0.07	0	0	0	0	0	0	0	0	0	0	0	0	0	0	0	0	0	0	0	0	0	0	0	0	0	0	0	0	2	0	0	0	0	0
66fcd5291efbb500ddd34c3ed3cc8a4b09a06be1	#N/A	Metazoa	0.98	Arthropoda	0.81	unclassified_Arthropoda	0.72	unclassified_Arthropoda	0.4	unclassified_Arthropoda	0.07	unclassified_Arthropoda	0.07	unclassified_Arthropoda_sp	0.07	0	0	0	0	0	0	0	9	0	0	0	0	0	0	0	0	0	0	0	0	0	0	0	0	0	0	0	0	0	0	0	0	0	0
6fcaae13b277d501c33c8d558a06568dcbd62768	#N/A	Metazoa	0.97	Arthropoda	0.82	unclassified_Arthropoda	0.5	unclassified_Arthropoda	0.21	unclassified_Arthropoda	0.08	unclassified_Arthropoda	0.07	unclassified_Arthropoda_sp	0.07	0	0	0	0	0	0	0	0	0	0	0	0	0	0	0	0	0	0	0	0	0	0	0	4	0	0	0	0	0	0	0	0	0	0
704508e3c62a4ff15b7f8128d1affa3545bc07c8	#N/A	Metazoa	1	Arthropoda	0.93	unclassified_Arthropoda	0.42	unclassified_Arthropoda	0.36	unclassified_Arthropoda	0.15	unclassified_Arthropoda	0.07	unclassified_Arthropoda_sp	0.07	0	0	0	0	0	0	0	0	0	0	0	0	0	0	0	0	0	0	0	0	0	0	0	0	0	0	0	0	0	0	0	2	0	0
76e677b3b7c0c34d8045baeba949a19048aa0285	#N/A	Metazoa	1	Arthropoda	0.82	unclassified_Arthropoda	0.59	unclassified_Arthropoda	0.09	unclassified_Arthropoda	0.07	unclassified_Arthropoda	0.07	unclassified_Arthropoda_sp	0.07	0	0	0	0	0	0	96	6	3	0	0	0	0	0	0	0	0	0	0	2	0	0	0	0	6	0	0	18	0	0	0	3	0	0
7e8607ebc7fd24328288b50b662495632cb88000	#N/A	Metazoa	0.99	Arthropoda	0.87	unclassified_Arthropoda	0.6	unclassified_Arthropoda	0.21	unclassified_Arthropoda	0.07	unclassified_Arthropoda	0.07	unclassified_Arthropoda_sp	0.07	0	0	0	0	0	0	0	0	0	0	0	0	0	0	0	0	0	0	0	0	0	0	0	0	0	0	0	0	0	0	0	0	0	0
c01b50e62a3abc7d23aacf29fc19ef0fd069cfdf	#N/A	Metazoa	1	Arthropoda	0.81	unclassified_Arthropoda	0.17	unclassified_Arthropoda	0.09	unclassified_Arthropoda	0.08	unclassified_Arthropoda	0.07	unclassified_Arthropoda_sp	0.07	0	0	0	0	0	0	0	0	0	0	0	0	0	0	0	0	0	0	0	0	0	0	0	0	0	0	0	0	0	0	0	0	0	0
d7f1a2893a4d7c7a9da376dd7f6284067a58dcaa	#N/A	Metazoa	0.97	Arthropoda	0.85	unclassified_Arthropoda	0.51	unclassified_Arthropoda	0.42	unclassified_Arthropoda	0.08	unclassified_Arthropoda	0.07	unclassified_Arthropoda_sp	0.06	0	0	0	0	0	0	0	0	0	0	0	0	0	0	0	0	0	0	0	0	0	0	0	0	0	0	0	0	0	3	0	0	0	0
f08478bf0ec423126c7e9bd4de07746f9c432347	#N/A	Metazoa	0.98	Arthropoda	0.83	unclassified_Arthropoda	0.59	unclassified_Arthropoda	0.12	unclassified_Arthropoda	0.07	unclassified_Arthropoda	0.07	unclassified_Arthropoda_sp	0.05	0	0	0	0	0	0	0	0	0	0	0	0	0	0	0	0	0	0	0	0	0	0	0	0	0	0	0	0	0	0	0	0	0	0
f52c329acbdf0f3b57759c656cc0876236257404	#N/A	Metazoa	0.99	Arthropoda	0.85	unclassified_Arthropoda	0.65	unclassified_Arthropoda	0.11	unclassified_Arthropoda	0.07	unclassified_Arthropoda	0.07	unclassified_Arthropoda_sp	0.05	0	0	0	0	0	0	0	0	0	0	0	0	0	0	0	0	0	0	0	0	0	0	0	0	0	0	10	0	0	0	0	0	0	0
007e90eb02e8579bc2e3b7a6602292bcd9ec42e0	#N/A	Metazoa	0.9	Arthropoda	0.83	unclassified_Arthropoda	0.5	unclassified_Arthropoda	0.07	unclassified_Arthropoda	0.06	unclassified_Arthropoda	0.06	unclassified_Arthropoda_sp	0.06	0	22	0	0	0	2	0	5	0	0	0	0	0	0	0	0	0	0	0	0	0	0	0	0	0	0	0	0	0	0	0	15	5	0
270f0b3e444593f31d6160c0ef1b08d94104b32e	#N/A	Metazoa	0.97	Arthropoda	0.8	unclassified_Arthropoda	0.38	unclassified_Arthropoda	0.21	unclassified_Arthropoda	0.06	unclassified_Arthropoda	0.06	unclassified_Arthropoda_sp	0.06	0	0	0	0	0	0	0	0	0	0	0	0	0	0	0	0	0	0	0	0	0	0	0	0	0	0	0	7	0	0	0	0	0	0
44c2f910b3f40c51a133fe7b340e2e69bc57e4ab	#N/A	Metazoa	1	Arthropoda	0.88	unclassified_Arthropoda	0.26	unclassified_Arthropoda	0.17	unclassified_Arthropoda	0.1	unclassified_Arthropoda	0.06	unclassified_Arthropoda_sp	0.06	0	0	0	0	0	0	0	0	0	0	0	0	0	0	0	0	0	0	0	0	3	0	0	0	0	2	0	0	0	0	0	4	0	0
767f6445ae3f91f40ac93e152392e83d074119a4	#N/A	Metazoa	1	Arthropoda	0.84	unclassified_Arthropoda	0.14	unclassified_Arthropoda	0.08	unclassified_Arthropoda	0.06	unclassified_Arthropoda	0.06	unclassified_Arthropoda_sp	0.06	0	0	0	0	0	0	0	0	0	0	0	0	0	0	0	0	3	0	0	0	0	0	0	0	0	0	0	0	0	0	0	0	0	0
9484436f56876b3d5dc44f6ff03c81ce0e644780	#N/A	Metazoa	0.98	Arthropoda	0.82	unclassified_Arthropoda	0.17	unclassified_Arthropoda	0.12	unclassified_Arthropoda	0.06	unclassified_Arthropoda	0.06	unclassified_Arthropoda_sp	0.06	0	0	0	0	4	0	0	0	0	0	0	0	0	0	0	0	0	0	0	0	0	0	0	0	0	0	0	0	0	0	0	0	0	0
9f293126e88ff6e95c08eb1fbd64ee34ea379f53	#N/A	Metazoa	1	Arthropoda	0.95	unclassified_Arthropoda	0.25	unclassified_Arthropoda	0.23	unclassified_Arthropoda	0.16	unclassified_Arthropoda	0.06	unclassified_Arthropoda_sp	0.06	0	0	0	0	0	0	0	0	0	0	0	0	0	0	0	0	0	0	0	0	0	0	0	0	5	0	0	0	0	0	0	0	0	0
a04e055432c9c9c3e3209573881d4cfd4164324f	#N/A	Metazoa	1	Arthropoda	0.9	unclassified_Arthropoda	0.18	unclassified_Arthropoda	0.1	unclassified_Arthropoda	0.07	unclassified_Arthropoda	0.06	unclassified_Arthropoda_sp	0.06	0	0	0	0	0	0	0	0	0	0	0	0	0	0	0	23	0	0	0	2	0	0	0	0	0	0	0	0	0	0	0	0	0	0
bc14211a9d76dc891ed34bfd4c2260bf89c39c8b	#N/A	Metazoa	0.88	Arthropoda	0.8	unclassified_Arthropoda	0.71	unclassified_Arthropoda	0.08	unclassified_Arthropoda	0.06	unclassified_Arthropoda	0.06	unclassified_Arthropoda_sp	0.06	0	0	0	0	0	0	0	0	0	0	0	0	0	0	0	0	0	0	0	0	0	0	0	0	0	0	0	0	0	0	0	0	0	0
c7313ec5e15c018dd7b8e18da6bb33e7a4803da7	#N/A	Metazoa	0.99	Arthropoda	0.89	unclassified_Arthropoda	0.72	unclassified_Arthropoda	0.06	unclassified_Arthropoda	0.06	unclassified_Arthropoda	0.06	unclassified_Arthropoda_sp	0.06	0	0	0	0	0	0	0	0	0	0	0	0	0	0	0	0	0	0	0	0	0	0	0	0	0	0	0	0	0	0	0	0	0	0
326a22847860fa5a5d09d1ff0f96fbca67a2f4bc	#N/A	Metazoa	0.88	Arthropoda	0.83	unclassified_Arthropoda	0.7	unclassified_Arthropoda	0.14	unclassified_Arthropoda	0.06	unclassified_Arthropoda	0.06	unclassified_Arthropoda_sp	0.05	0	0	0	0	0	0	0	0	0	0	0	0	0	0	0	0	0	0	0	0	0	0	0	0	0	0	2	0	0	0	0	0	0	0
6da7a7af35225e9421591afe7c5ddcb6c326e3ce	#N/A	Metazoa	0.98	Arthropoda	0.84	unclassified_Arthropoda	0.58	unclassified_Arthropoda	0.41	unclassified_Arthropoda	0.07	unclassified_Arthropoda	0.06	unclassified_Arthropoda_sp	0.03	0	0	0	2	0	0	0	0	0	0	0	0	0	0	0	0	0	0	0	0	0	0	0	0	0	0	0	0	0	0	0	0	0	0
0ba3bd8fd1b49943053ece4d0960da078cc9eef0	#N/A	Metazoa	0.97	Arthropoda	0.87	unclassified_Arthropoda	0.24	unclassified_Arthropoda	0.07	unclassified_Arthropoda	0.05	unclassified_Arthropoda	0.05	unclassified_Arthropoda_sp	0.05	0	0	0	0	0	0	0	0	0	0	35	0	0	0	0	0	0	0	0	0	0	0	0	0	0	0	0	0	0	0	0	0	0	0
1720e51690f8d3c0039fb25e920367ea59e4540e	#N/A	Metazoa	1	Arthropoda	0.89	unclassified_Arthropoda	0.72	unclassified_Arthropoda	0.17	unclassified_Arthropoda	0.07	unclassified_Arthropoda	0.05	unclassified_Arthropoda_sp	0.05	0	0	0	0	0	0	0	0	0	0	0	0	0	0	0	0	0	0	0	0	0	0	2	0	0	0	0	0	0	0	0	0	0	0
1e9c1a148999b7a7fb1e395d3c1ba9934e563053	#N/A	Metazoa	0.99	Arthropoda	0.87	unclassified_Arthropoda	0.21	unclassified_Arthropoda	0.07	unclassified_Arthropoda	0.05	unclassified_Arthropoda	0.05	unclassified_Arthropoda_sp	0.05	0	0	0	0	0	3	0	0	0	0	0	0	0	0	0	0	0	0	0	0	0	0	0	0	0	0	0	0	0	0	0	0	0	0
2429cf0b30f218896bcff5370d00e64ab08f1799	#N/A	Metazoa	0.99	Arthropoda	0.8	unclassified_Arthropoda	0.57	unclassified_Arthropoda	0.12	unclassified_Arthropoda	0.09	unclassified_Arthropoda	0.05	unclassified_Arthropoda_sp	0.05	0	0	0	0	0	0	0	0	0	0	0	0	0	0	5	0	0	0	0	0	4	0	0	0	18	4	0	9	0	0	0	3	0	0
2929c5c10a1de50151e75e5d74b2ca28005ca20e	#N/A	Metazoa	0.99	Arthropoda	0.87	unclassified_Arthropoda	0.15	unclassified_Arthropoda	0.05	unclassified_Arthropoda	0.05	unclassified_Arthropoda	0.05	unclassified_Arthropoda_sp	0.05	0	0	0	0	0	0	0	0	0	0	0	695	0	403	0	0	0	0	7	0	0	92	0	0	0	0	0	0	0	11	0	0	0	0
424ec176f2ef8699e40d688232987dba0b18123a	#N/A	Metazoa	0.96	Arthropoda	0.9	unclassified_Arthropoda	0.24	unclassified_Arthropoda	0.19	unclassified_Arthropoda	0.07	unclassified_Arthropoda	0.05	unclassified_Arthropoda_sp	0.05	0	0	0	2	0	0	0	0	0	0	0	0	0	0	0	0	0	0	0	0	0	0	0	0	0	0	0	0	0	0	0	0	0	0
526b0a4830b26b97c1605611c7bfe8b01038d879	#N/A	Metazoa	1	Arthropoda	0.92	unclassified_Arthropoda	0.57	unclassified_Arthropoda	0.11	unclassified_Arthropoda	0.08	unclassified_Arthropoda	0.05	unclassified_Arthropoda_sp	0.05	0	0	0	0	0	0	0	0	0	0	0	0	0	0	0	0	0	0	0	0	0	0	0	0	0	0	0	0	0	0	0	0	0	0
5908904c347090a6c8158ddecf2bb74c99cd91c2	#N/A	Metazoa	1	Arthropoda	0.9	unclassified_Arthropoda	0.61	unclassified_Arthropoda	0.09	unclassified_Arthropoda	0.09	unclassified_Arthropoda	0.05	unclassified_Arthropoda_sp	0.05	0	0	0	0	0	0	0	0	0	0	0	0	0	0	0	0	0	0	0	0	0	0	0	0	0	0	0	0	0	0	0	3	0	0
628e2fce3d9aa530ea2c49d93f1b153d48fc47be	#N/A	Metazoa	1	Arthropoda	0.89	unclassified_Arthropoda	0.24	unclassified_Arthropoda	0.16	unclassified_Arthropoda	0.16	unclassified_Arthropoda	0.05	unclassified_Arthropoda_sp	0.05	0	0	0	0	0	0	0	0	0	0	0	0	0	0	0	0	0	0	0	0	0	0	0	0	0	0	0	0	0	0	0	0	0	0
73f21115358df501fcb6319d1186d263fd933953	#N/A	Metazoa	1	Arthropoda	0.84	unclassified_Arthropoda	0.66	unclassified_Arthropoda	0.11	unclassified_Arthropoda	0.05	unclassified_Arthropoda	0.05	unclassified_Arthropoda_sp	0.05	0	0	0	0	0	0	0	0	0	0	0	0	0	0	0	0	0	0	3	0	0	0	0	0	0	0	0	0	0	0	0	0	0	0
982f3f9f14ddd1c8c6da7c860337cf84a41d6078	#N/A	Metazoa	1	Arthropoda	0.89	unclassified_Arthropoda	0.65	unclassified_Arthropoda	0.1	unclassified_Arthropoda	0.07	unclassified_Arthropoda	0.05	unclassified_Arthropoda_sp	0.05	3	0	0	0	0	0	0	0	0	0	0	0	4	26	0	0	0	0	0	0	0	0	0	0	0	0	0	0	0	0	0	5	0	0
9f0c7b7687e6a7374577e66192781a95bc553f0b	#N/A	Metazoa	0.99	Arthropoda	0.81	unclassified_Arthropoda	0.32	unclassified_Arthropoda	0.18	unclassified_Arthropoda	0.07	unclassified_Arthropoda	0.05	unclassified_Arthropoda_sp	0.05	0	0	0	0	0	0	0	0	0	0	0	0	0	0	0	0	0	0	0	0	0	0	0	0	0	0	0	0	2	0	0	0	0	0
a5543901982bb4e973ef89ab6bf6108474a8152e	#N/A	Metazoa	1	Arthropoda	0.96	unclassified_Arthropoda	0.75	unclassified_Arthropoda	0.2	unclassified_Arthropoda	0.06	unclassified_Arthropoda	0.05	unclassified_Arthropoda_sp	0.05	0	0	4	0	0	0	0	0	0	0	0	0	0	0	0	0	0	0	0	0	0	0	0	0	0	0	0	0	0	0	0	0	9	0
a8562aaab26a547fdadd184b09c6802d5777f12b	#N/A	Metazoa	0.95	Arthropoda	0.85	unclassified_Arthropoda	0.63	unclassified_Arthropoda	0.18	unclassified_Arthropoda	0.06	unclassified_Arthropoda	0.05	unclassified_Arthropoda_sp	0.05	0	0	0	0	0	0	0	0	0	0	0	0	0	0	0	0	0	0	0	0	2	0	0	0	0	0	0	0	0	0	0	0	0	0
a96508ba0e21f3312cf7992264ab92e2927311e4	#N/A	Metazoa	0.99	Arthropoda	0.96	unclassified_Arthropoda	0.77	unclassified_Arthropoda	0.07	unclassified_Arthropoda	0.05	unclassified_Arthropoda	0.05	unclassified_Arthropoda_sp	0.05	0	0	0	13	0	0	0	0	0	0	0	0	0	0	0	9	0	3	0	30	3	28	0	0	0	0	0	0	0	0	0	0	0	2
bf6b5b22340d359ca95f34978775a89537476ba3	#N/A	Metazoa	1	Arthropoda	0.83	unclassified_Arthropoda	0.62	unclassified_Arthropoda	0.07	unclassified_Arthropoda	0.05	unclassified_Arthropoda	0.05	unclassified_Arthropoda_sp	0.05	0	0	0	0	0	0	0	0	0	0	0	0	0	0	0	0	0	0	0	0	0	0	0	0	0	0	0	2	0	0	0	0	0	0
ee15c34d2e631c7d0dca91fb92031dc47500625b	#N/A	Metazoa	1	Arthropoda	0.93	unclassified_Arthropoda	0.05	unclassified_Arthropoda	0.05	unclassified_Arthropoda	0.05	unclassified_Arthropoda	0.05	unclassified_Arthropoda_sp	0.05	0	0	0	0	0	0	0	0	0	0	19	0	0	0	0	0	0	0	0	0	0	0	2	0	0	0	0	0	0	0	0	0	3	0
69f340f149f02196434b370c3920eade11161e76	#N/A	Metazoa	0.98	Arthropoda	0.85	unclassified_Arthropoda	0.62	unclassified_Arthropoda	0.08	unclassified_Arthropoda	0.07	unclassified_Arthropoda	0.05	unclassified_Arthropoda_sp	0.04	0	0	0	0	0	0	0	0	0	0	0	2	0	0	0	2	0	0	0	0	0	0	0	0	0	2	0	0	0	0	0	0	0	0
a1a34f4cd93b7ac64cce8f1b3d187d10ddfd8c47	#N/A	Metazoa	0.98	Arthropoda	0.83	unclassified_Arthropoda	0.64	unclassified_Arthropoda	0.08	unclassified_Arthropoda	0.05	unclassified_Arthropoda	0.05	unclassified_Arthropoda_sp	0.04	0	0	0	0	0	0	0	0	0	0	0	0	0	0	0	0	2	0	3	0	0	0	0	0	0	0	0	0	0	0	0	0	0	0
e5044d1cedffaa88d20835a4b3f79ec429daf1a4	#N/A	Metazoa	1	Arthropoda	0.84	unclassified_Arthropoda	0.66	unclassified_Arthropoda	0.12	unclassified_Arthropoda	0.06	unclassified_Arthropoda	0.05	unclassified_Arthropoda_sp	0.03	3	0	0	0	0	0	0	0	0	0	0	0	0	0	0	0	0	3	0	0	0	0	0	0	0	0	0	0	0	0	20	0	0	0
e88cde6094b7e46d65c8c267acf8432a00f76362	#N/A	Metazoa	1	Arthropoda	0.92	unclassified_Arthropoda	0.58	unclassified_Arthropoda	0.28	unclassified_Arthropoda	0.08	unclassified_Arthropoda	0.05	unclassified_Arthropoda_sp	0.03	0	0	0	0	0	0	0	0	0	0	0	0	0	0	0	0	0	0	0	0	0	0	5	0	0	0	0	0	0	0	0	0	0	0
4f24232c995b7cc8c2dbb3c8a66876264d8f771d	#N/A	Metazoa	1	Arthropoda	0.9	unclassified_Arthropoda	0.67	unclassified_Arthropoda	0.15	unclassified_Arthropoda	0.06	unclassified_Arthropoda	0.05	unclassified_Arthropoda_sp	0.01	0	0	0	0	0	0	0	0	0	0	0	0	0	0	0	0	0	0	0	0	0	0	0	0	0	0	0	0	0	0	0	0	0	0
0f2888a5e140452458529cc192b252ea8ecab4e7	#N/A	Metazoa	1	Arthropoda	0.92	unclassified_Arthropoda	0.75	unclassified_Arthropoda	0.19	unclassified_Arthropoda	0.07	unclassified_Arthropoda	0.04	unclassified_Arthropoda_sp	0.04	0	0	0	0	0	0	0	0	0	0	0	0	0	0	0	0	0	0	0	0	0	0	0	0	0	0	0	0	0	0	0	0	0	0
10ebd9783a6be0cff032d2857ea9a810c7684257	#N/A	Metazoa	0.99	Arthropoda	0.92	unclassified_Arthropoda	0.73	unclassified_Arthropoda	0.06	unclassified_Arthropoda	0.04	unclassified_Arthropoda	0.04	unclassified_Arthropoda_sp	0.04	0	0	0	0	2	0	0	0	0	0	0	0	0	0	0	0	0	3	0	0	0	0	0	0	0	0	0	0	0	0	0	0	0	0
12284c07ce954c0d2b41a9d8c45877aa387bc927	#N/A	Metazoa	1	Arthropoda	0.96	unclassified_Arthropoda	0.67	unclassified_Arthropoda	0.24	unclassified_Arthropoda	0.07	unclassified_Arthropoda	0.04	unclassified_Arthropoda_sp	0.04	0	0	0	0	0	0	0	0	0	0	0	0	0	0	0	0	0	0	0	0	0	0	0	9	0	0	0	0	0	0	0	0	0	0
1b6e2b315eb65c815e4904967e263426dcd5838a	#N/A	Metazoa	0.94	Arthropoda	0.8	unclassified_Arthropoda	0.45	unclassified_Arthropoda	0.04	unclassified_Arthropoda	0.04	unclassified_Arthropoda	0.04	unclassified_Arthropoda_sp	0.04	0	0	0	0	0	0	0	0	0	0	0	0	5	0	0	0	150	5	0	0	0	0	0	0	0	0	0	0	0	4	0	0	0	2
21e087291923f988e396bdeb2fe7cc69cebce8ab	#N/A	Metazoa	1	Arthropoda	0.99	unclassified_Arthropoda	0.13	unclassified_Arthropoda	0.08	unclassified_Arthropoda	0.04	unclassified_Arthropoda	0.04	unclassified_Arthropoda_sp	0.04	0	0	0	0	0	0	0	0	0	3	0	2	0	0	0	0	0	0	0	0	0	0	0	0	0	0	0	0	0	0	0	0	0	0
3e12605addfc03427c23aacd968bbf4441fd4190	#N/A	Metazoa	0.95	Arthropoda	0.87	unclassified_Arthropoda	0.71	unclassified_Arthropoda	0.17	unclassified_Arthropoda	0.05	unclassified_Arthropoda	0.04	unclassified_Arthropoda_sp	0.04	0	0	0	0	2	0	0	0	0	0	0	0	0	0	0	0	0	0	0	0	0	0	0	0	0	0	0	0	0	0	0	0	0	0
56f178119c03c1a18bf1ea4d89855febc46b1186	#N/A	Metazoa	1	Arthropoda	0.92	unclassified_Arthropoda	0.57	unclassified_Arthropoda	0.14	unclassified_Arthropoda	0.06	unclassified_Arthropoda	0.04	unclassified_Arthropoda_sp	0.04	0	0	0	0	0	0	0	0	0	0	0	0	0	0	0	0	0	0	0	0	0	0	0	0	0	0	0	0	0	0	0	0	0	0
73e724a28a978d488dc8bdc5dede9d2a4bedfba7	#N/A	Metazoa	0.99	Arthropoda	0.85	unclassified_Arthropoda	0.23	unclassified_Arthropoda	0.04	unclassified_Arthropoda	0.04	unclassified_Arthropoda	0.04	unclassified_Arthropoda_sp	0.04	0	4	0	5	0	0	0	0	0	0	0	4	0	0	8	4	25	5	4	0	534	3	0	0	0	0	0	3	5	10	10	8	0	3
7eba5d551e05a160247b217e0655a0a1de0e7949	#N/A	Metazoa	1	Arthropoda	0.88	unclassified_Arthropoda	0.73	unclassified_Arthropoda	0.09	unclassified_Arthropoda	0.04	unclassified_Arthropoda	0.04	unclassified_Arthropoda_sp	0.04	0	0	0	0	0	0	0	0	0	2	0	0	0	0	0	0	0	0	0	0	0	0	0	0	0	0	0	0	0	0	0	0	0	0
81245cfac7d6ce56e2b359e0ca541abb1d7428c3	#N/A	Metazoa	1	Arthropoda	0.98	unclassified_Arthropoda	0.78	unclassified_Arthropoda	0.21	unclassified_Arthropoda	0.05	unclassified_Arthropoda	0.04	unclassified_Arthropoda_sp	0.04	0	0	0	0	0	0	0	0	0	0	0	0	0	0	0	0	0	0	0	0	0	0	2	0	0	0	0	0	0	0	0	0	0	0
870f5af1fbf0685cab57b650679b38e9e13b393c	#N/A	Metazoa	0.99	Arthropoda	0.84	unclassified_Arthropoda	0.17	unclassified_Arthropoda	0.13	unclassified_Arthropoda	0.04	unclassified_Arthropoda	0.04	unclassified_Arthropoda_sp	0.04	0	0	0	0	0	0	0	0	0	0	0	0	0	0	0	0	0	0	0	0	0	0	0	0	0	0	2	0	0	0	14	0	0	0
895a45c1f5430dcde264f963662397de368afa18	#N/A	Metazoa	0.98	Arthropoda	0.89	unclassified_Arthropoda	0.34	unclassified_Arthropoda	0.25	unclassified_Arthropoda	0.11	unclassified_Arthropoda	0.04	unclassified_Arthropoda_sp	0.04	0	0	0	0	0	0	0	0	0	0	0	0	0	0	0	0	0	0	0	0	0	0	0	0	0	0	0	0	0	0	0	0	0	0
8a079ec2f393d7e7f73cf0ce3f96366dad324c3b	#N/A	Metazoa	1	Arthropoda	0.93	unclassified_Arthropoda	0.64	unclassified_Arthropoda	0.27	unclassified_Arthropoda	0.1	unclassified_Arthropoda	0.04	unclassified_Arthropoda_sp	0.04	0	0	0	0	0	0	0	0	0	0	0	0	0	0	0	0	0	0	0	0	0	0	0	0	0	0	0	0	0	3	0	0	0	0
8d3b68b0226512948bd33ab7707e6ecd10f94b43	#N/A	Metazoa	1	Arthropoda	0.87	unclassified_Arthropoda	0.76	unclassified_Arthropoda	0.06	unclassified_Arthropoda	0.05	unclassified_Arthropoda	0.04	unclassified_Arthropoda_sp	0.04	0	0	0	0	0	0	0	0	0	0	0	0	0	0	0	0	0	0	0	0	0	0	0	0	0	0	0	0	0	0	0	0	0	0
8d5f6228245e3acfdc5605cebbaec8c987e25959	#N/A	Metazoa	0.94	Arthropoda	0.81	unclassified_Arthropoda	0.62	unclassified_Arthropoda	0.25	unclassified_Arthropoda	0.13	unclassified_Arthropoda	0.04	unclassified_Arthropoda_sp	0.04	0	0	0	0	0	0	0	0	3	0	0	0	0	0	0	0	0	0	0	0	0	0	0	0	0	0	0	0	0	0	0	0	0	0
954c8e3a35ee53203e835999f772054fc0a80d23	#N/A	Metazoa	0.99	Arthropoda	0.83	unclassified_Arthropoda	0.29	unclassified_Arthropoda	0.2	unclassified_Arthropoda	0.05	unclassified_Arthropoda	0.04	unclassified_Arthropoda_sp	0.04	0	40	0	18	5	17	0	0	0	0	3	0	5	10	0	200	624	6	5	0	4	7	3	0	0	0	0	0	59	0	4	13	0	8
a05f26a906702daa88bb4d3481259878fcc17c03	#N/A	Metazoa	0.99	Arthropoda	0.88	unclassified_Arthropoda	0.63	unclassified_Arthropoda	0.21	unclassified_Arthropoda	0.04	unclassified_Arthropoda	0.04	unclassified_Arthropoda_sp	0.04	0	0	0	0	0	0	0	0	0	0	0	0	0	0	2	0	0	62	7	0	14	0	37	0	0	0	0	3	0	0	0	0	0	0
b40edb243a4118f5372e1a76ed089d6040dcf29a	#N/A	Metazoa	1	Arthropoda	0.86	unclassified_Arthropoda	0.58	unclassified_Arthropoda	0.18	unclassified_Arthropoda	0.06	unclassified_Arthropoda	0.04	unclassified_Arthropoda_sp	0.04	0	0	0	0	0	0	0	0	0	0	0	0	0	0	0	0	2	0	0	0	0	0	0	0	0	0	0	0	0	0	0	0	0	0
bc9ec5eb7a41762c1bb670c8f9731da899d1c58f	#N/A	Metazoa	0.98	Arthropoda	0.92	unclassified_Arthropoda	0.16	unclassified_Arthropoda	0.04	unclassified_Arthropoda	0.04	unclassified_Arthropoda	0.04	unclassified_Arthropoda_sp	0.04	0	0	0	0	0	0	0	0	0	0	0	0	0	0	0	0	0	2	0	0	0	0	0	0	0	0	0	0	0	0	0	0	0	0
c78c51b42148ed956bccb991087808211a9c8379	#N/A	Metazoa	1	Arthropoda	0.85	unclassified_Arthropoda	0.5	unclassified_Arthropoda	0.15	unclassified_Arthropoda	0.05	unclassified_Arthropoda	0.04	unclassified_Arthropoda_sp	0.04	0	0	0	0	0	0	3	0	0	0	0	0	0	0	0	0	0	0	0	0	0	0	0	0	0	0	0	0	0	0	0	0	0	0
cd92e5a9e85da42df607f213a977e6fd4116dfa4	#N/A	Metazoa	0.85	Arthropoda	0.8	unclassified_Arthropoda	0.72	unclassified_Arthropoda	0.21	unclassified_Arthropoda	0.04	unclassified_Arthropoda	0.04	unclassified_Arthropoda_sp	0.04	0	0	0	0	0	0	0	0	0	0	0	0	0	0	0	0	0	0	0	0	0	2	0	0	6	0	0	0	0	0	0	0	0	0
e3579b8261990dccd32e753bc39d993ddc63a807	#N/A	Metazoa	0.95	Arthropoda	0.84	unclassified_Arthropoda	0.32	unclassified_Arthropoda	0.07	unclassified_Arthropoda	0.07	unclassified_Arthropoda	0.04	unclassified_Arthropoda_sp	0.04	230	185	87	961	0	44	0	150	0	0	0	401	154	357	71	284	2441	581	216	89	927	48	480	42	0	0	0	52	0	673	404	1356	1809	198
e5f8be5c4a90d9ef9a33d895da961646a0774202	#N/A	Metazoa	0.98	Arthropoda	0.86	unclassified_Arthropoda	0.49	unclassified_Arthropoda	0.25	unclassified_Arthropoda	0.05	unclassified_Arthropoda	0.04	unclassified_Arthropoda_sp	0.04	0	0	0	0	0	0	0	0	0	0	0	0	2	0	0	0	0	0	0	0	0	0	0	0	0	0	0	0	0	0	0	0	0	0
f7442fe6390845b2f58afac1cea894098255f759	#N/A	Metazoa	0.95	Arthropoda	0.87	unclassified_Arthropoda	0.61	unclassified_Arthropoda	0.27	unclassified_Arthropoda	0.04	unclassified_Arthropoda	0.04	unclassified_Arthropoda_sp	0.03	0	0	0	0	0	0	0	0	0	0	0	0	0	0	0	2	0	0	0	0	0	0	0	0	0	0	0	0	0	0	0	0	0	0
097932fadff2261b27140625ce9b75594c916176	#N/A	Metazoa	0.99	Arthropoda	0.93	unclassified_Arthropoda	0.69	unclassified_Arthropoda	0.65	unclassified_Arthropoda	0.04	unclassified_Arthropoda	0.04	unclassified_Arthropoda_sp	0.02	0	0	0	0	0	0	0	0	0	0	0	0	0	0	0	0	0	0	0	0	3	3	0	0	0	0	0	0	0	0	0	0	0	0
db3dfd6419c563ef3f1ba32a8f6c2cf6ba267894	#N/A	Metazoa	1	Arthropoda	0.88	unclassified_Arthropoda	0.61	unclassified_Arthropoda	0.22	unclassified_Arthropoda	0.05	unclassified_Arthropoda	0.04	unclassified_Arthropoda_sp	0.01	0	0	0	0	0	0	0	0	0	0	0	0	0	0	0	0	0	0	0	0	0	0	0	0	0	0	0	0	0	0	0	0	0	0
099e524563fa1bb58b3df4a52a0c16e979200ece	#N/A	Metazoa	0.89	Arthropoda	0.88	unclassified_Arthropoda	0.71	unclassified_Arthropoda	0.03	unclassified_Arthropoda	0.03	unclassified_Arthropoda	0.03	unclassified_Arthropoda_sp	0.03	0	0	0	0	0	0	0	0	0	0	0	0	0	0	0	0	0	0	0	0	0	0	0	0	0	0	0	0	0	0	0	0	0	0
207f9a77d595d9f23bef7a7015ec8e20e5123e8b	#N/A	Metazoa	0.96	Arthropoda	0.86	unclassified_Arthropoda	0.56	unclassified_Arthropoda	0.1	unclassified_Arthropoda	0.04	unclassified_Arthropoda	0.03	unclassified_Arthropoda_sp	0.03	0	0	0	0	0	0	0	0	0	0	0	0	0	0	0	0	0	113	0	0	0	0	0	0	0	0	0	0	0	10	0	15	0	6
2990c03c65ed042a84f81eb6312bfc1bc777ea2b	#N/A	Metazoa	0.94	Arthropoda	0.84	unclassified_Arthropoda	0.24	unclassified_Arthropoda	0.13	unclassified_Arthropoda	0.03	unclassified_Arthropoda	0.03	unclassified_Arthropoda_sp	0.03	0	0	0	3	0	0	0	0	0	0	0	0	0	0	0	0	0	0	0	0	0	0	0	0	0	0	0	0	0	0	0	0	0	0
2aa00e61d503bc22080aa518d8ca4571f9671184	#N/A	Metazoa	1	Arthropoda	0.82	unclassified_Arthropoda	0.62	unclassified_Arthropoda	0.23	unclassified_Arthropoda	0.04	unclassified_Arthropoda	0.03	unclassified_Arthropoda_sp	0.03	0	0	0	0	0	0	0	0	0	0	0	0	0	0	0	0	0	0	0	0	0	0	0	0	0	0	0	0	0	6	0	0	0	0
33207dd928343d0d1049dea4a9943135f364e775	#N/A	Metazoa	1	Arthropoda	0.86	unclassified_Arthropoda	0.42	unclassified_Arthropoda	0.17	unclassified_Arthropoda	0.04	unclassified_Arthropoda	0.03	unclassified_Arthropoda_sp	0.03	0	0	0	0	0	0	0	0	0	0	0	0	0	0	0	0	4	0	0	0	0	0	0	0	0	0	0	0	0	2	0	0	0	0
479ab56d2eac9eb8c68aa5d120fb0184ff45e408	#N/A	Metazoa	0.97	Arthropoda	0.8	unclassified_Arthropoda	0.63	unclassified_Arthropoda	0.04	unclassified_Arthropoda	0.03	unclassified_Arthropoda	0.03	unclassified_Arthropoda_sp	0.03	0	0	0	0	0	0	0	0	0	0	0	0	0	0	0	0	0	0	0	0	0	0	0	0	0	0	0	0	0	0	0	0	0	0
5101bc57b25823bab01ef3b712a341935a49cb11	#N/A	Metazoa	1	Arthropoda	0.93	unclassified_Arthropoda	0.78	unclassified_Arthropoda	0.13	unclassified_Arthropoda	0.05	unclassified_Arthropoda	0.03	unclassified_Arthropoda_sp	0.03	0	0	0	0	0	0	0	0	0	0	0	0	0	0	0	0	0	50	0	0	0	0	0	0	0	0	0	0	0	0	0	0	0	0
5e572b78e203cd7036196263a4dc81947a9bf3f9	#N/A	Metazoa	0.98	Arthropoda	0.91	unclassified_Arthropoda	0.5	unclassified_Arthropoda	0.33	unclassified_Arthropoda	0.03	unclassified_Arthropoda	0.03	unclassified_Arthropoda_sp	0.03	0	0	0	2	0	0	0	0	0	0	0	0	0	0	0	0	0	0	0	0	0	0	0	0	0	0	0	0	0	0	0	0	0	0
620d3ec03fdec33cff419cfc28dcfd823c51dc12	#N/A	Metazoa	1	Arthropoda	0.85	unclassified_Arthropoda	0.54	unclassified_Arthropoda	0.17	unclassified_Arthropoda	0.05	unclassified_Arthropoda	0.03	unclassified_Arthropoda_sp	0.03	0	0	0	0	0	0	0	0	0	0	0	0	0	0	0	0	0	0	0	0	0	0	0	0	0	0	0	0	0	0	2	0	0	0
6c66997736adc28de6d9bca25bb46c40381561fa	#N/A	Metazoa	0.98	Arthropoda	0.85	unclassified_Arthropoda	0.67	unclassified_Arthropoda	0.05	unclassified_Arthropoda	0.04	unclassified_Arthropoda	0.03	unclassified_Arthropoda_sp	0.03	0	0	0	0	0	0	0	0	0	0	0	0	0	0	0	0	0	2	0	0	0	16	0	0	0	0	0	0	0	0	0	0	0	0
74066a09215f9150b7d411e0d38aba42a0212fa9	#N/A	Metazoa	0.98	Arthropoda	0.94	unclassified_Arthropoda	0.43	unclassified_Arthropoda	0.35	unclassified_Arthropoda	0.12	unclassified_Arthropoda	0.03	unclassified_Arthropoda_sp	0.03	0	0	0	0	0	0	0	0	0	0	0	0	0	0	0	0	2	0	0	0	0	0	0	0	0	0	0	0	0	0	0	0	0	0
7ea98421e4dc003c2c981f9d7b5661d90209e266	#N/A	Metazoa	0.93	Arthropoda	0.9	unclassified_Arthropoda	0.78	unclassified_Arthropoda	0.17	unclassified_Arthropoda	0.03	unclassified_Arthropoda	0.03	unclassified_Arthropoda_sp	0.03	0	0	0	0	0	0	0	0	0	0	0	0	2	0	0	0	0	0	0	0	0	0	0	0	0	0	0	0	0	0	0	0	0	0
94492a42708cc42d492ab30e9b10dbbff4bedc36	#N/A	Metazoa	1	Arthropoda	0.9	unclassified_Arthropoda	0.71	unclassified_Arthropoda	0.14	unclassified_Arthropoda	0.03	unclassified_Arthropoda	0.03	unclassified_Arthropoda_sp	0.03	0	2	0	0	0	0	0	0	0	0	0	0	0	0	0	0	0	7	0	0	0	0	0	0	0	0	0	0	0	0	0	0	0	0
9d9c3275afc54f952fcf983cbc5bf055e3f70f18	#N/A	Metazoa	0.9	Arthropoda	0.84	unclassified_Arthropoda	0.75	unclassified_Arthropoda	0.26	unclassified_Arthropoda	0.18	unclassified_Arthropoda	0.03	unclassified_Arthropoda_sp	0.03	0	0	0	0	0	0	0	0	0	0	0	0	0	0	0	0	0	0	0	0	0	0	0	0	0	0	0	0	0	0	0	0	0	0
a899d95dde80da948cda43194c2d912face80253	#N/A	Metazoa	1	Arthropoda	0.95	unclassified_Arthropoda	0.71	unclassified_Arthropoda	0.32	unclassified_Arthropoda	0.07	unclassified_Arthropoda	0.03	unclassified_Arthropoda_sp	0.03	0	0	0	0	0	0	0	0	0	0	0	0	0	0	0	0	0	0	0	0	0	0	0	0	0	0	0	0	0	0	0	0	0	0
ab47fb4692e6cc6f0bab60c05a4c2a1aa361af3a	#N/A	Metazoa	1	Arthropoda	0.92	unclassified_Arthropoda	0.71	unclassified_Arthropoda	0.12	unclassified_Arthropoda	0.04	unclassified_Arthropoda	0.03	unclassified_Arthropoda_sp	0.03	0	3	0	0	0	100	5	0	0	4	69	2	114	0	55	0	140	0	5	0	8	15	2	0	3	0	0	8	6	9	0	0	12	4
aec6b349b2aba6eb9d75d0c2aa6d71e08fc072c1	#N/A	Metazoa	1	Arthropoda	0.81	unclassified_Arthropoda	0.26	unclassified_Arthropoda	0.11	unclassified_Arthropoda	0.03	unclassified_Arthropoda	0.03	unclassified_Arthropoda_sp	0.03	0	0	0	0	0	0	0	0	0	0	0	3	0	0	0	0	0	0	0	0	0	0	0	0	0	0	0	0	0	0	0	0	0	0
afcef3a92d95c72440e9d9b82cd06e067ca050cc	#N/A	Metazoa	0.99	Arthropoda	0.86	unclassified_Arthropoda	0.28	unclassified_Arthropoda	0.08	unclassified_Arthropoda	0.03	unclassified_Arthropoda	0.03	unclassified_Arthropoda_sp	0.03	0	0	0	0	0	0	0	2	0	0	0	0	0	0	0	0	0	0	0	0	3	0	0	0	0	0	0	2	0	0	0	0	0	0
cf73084de4acb76fff6dcbcc32118df06128ab71	#N/A	Metazoa	1	Arthropoda	0.81	unclassified_Arthropoda	0.48	unclassified_Arthropoda	0.14	unclassified_Arthropoda	0.03	unclassified_Arthropoda	0.03	unclassified_Arthropoda_sp	0.03	0	0	0	0	0	0	0	0	0	0	0	0	0	0	0	0	0	0	0	0	0	0	0	0	0	0	0	0	0	2	0	0	0	0
d3b4cd9a7438bc5362bc15f530dd05cf7bb568ae	#N/A	Metazoa	0.99	Arthropoda	0.85	unclassified_Arthropoda	0.32	unclassified_Arthropoda	0.15	unclassified_Arthropoda	0.03	unclassified_Arthropoda	0.03	unclassified_Arthropoda_sp	0.03	0	0	0	2	0	0	0	0	0	0	2	0	0	0	0	0	0	0	0	2	8	0	29	0	0	0	0	0	0	0	0	0	0	0
d4bf08958498cea7d68bad135fc3ebb9a8994d49	#N/A	Metazoa	1	Arthropoda	0.95	unclassified_Arthropoda	0.74	unclassified_Arthropoda	0.38	unclassified_Arthropoda	0.06	unclassified_Arthropoda	0.03	unclassified_Arthropoda_sp	0.03	0	0	0	0	0	0	4	0	0	0	0	0	0	0	0	0	0	0	0	0	0	0	0	0	0	0	0	0	0	0	0	0	0	0
e25e63aadad3501ed59951c83211f15b3ca5f056	#N/A	Metazoa	0.98	Arthropoda	0.94	unclassified_Arthropoda	0.73	unclassified_Arthropoda	0.04	unclassified_Arthropoda	0.03	unclassified_Arthropoda	0.03	unclassified_Arthropoda_sp	0.03	0	0	0	0	0	0	0	0	0	0	0	0	0	0	0	0	0	6	2	2	0	7	2	0	0	0	0	0	0	6	0	0	0	0
e26c878cc9dc54c429c2e164c96485b33ebf3dcc	#N/A	Metazoa	0.99	Arthropoda	0.8	unclassified_Arthropoda	0.29	unclassified_Arthropoda	0.11	unclassified_Arthropoda	0.03	unclassified_Arthropoda	0.03	unclassified_Arthropoda_sp	0.03	0	0	0	0	0	0	0	3	0	0	0	0	0	0	0	0	0	0	0	0	0	0	13	0	0	0	0	0	0	3	0	0	0	0
ecaa342979b0ce164f23566aba1f8c1515527a28	#N/A	Metazoa	0.99	Arthropoda	0.8	unclassified_Arthropoda	0.6	unclassified_Arthropoda	0.28	unclassified_Arthropoda	0.06	unclassified_Arthropoda	0.03	unclassified_Arthropoda_sp	0.03	0	0	0	0	0	0	0	0	0	0	0	0	12	0	4	0	0	137	44	0	22	0	0	0	0	0	0	0	0	0	0	4	0	0
f62e7f642a0d737bf8dc0ae2e9e89c1d97ece8b3	#N/A	Metazoa	1	Arthropoda	0.89	unclassified_Arthropoda	0.4	unclassified_Arthropoda	0.15	unclassified_Arthropoda	0.03	unclassified_Arthropoda	0.03	unclassified_Arthropoda_sp	0.03	0	0	0	0	0	0	0	0	0	0	0	11	0	0	0	0	0	0	0	3	0	0	0	0	0	0	0	0	0	0	0	0	0	0
fb016f71865d3a839ae54e9d86cb58a445499feb	#N/A	Metazoa	0.94	Arthropoda	0.84	unclassified_Arthropoda	0.7	unclassified_Arthropoda	0.04	unclassified_Arthropoda	0.04	unclassified_Arthropoda	0.03	unclassified_Arthropoda_sp	0.03	0	0	0	0	0	0	0	0	0	0	2	0	0	0	0	0	0	2	0	0	0	0	15	0	0	0	0	0	0	0	0	0	0	0
fd8b879a138747bdad879971c3a5435d02cd7030	#N/A	Metazoa	0.9	Arthropoda	0.85	unclassified_Arthropoda	0.77	unclassified_Arthropoda	0.49	unclassified_Arthropoda	0.07	unclassified_Arthropoda	0.03	unclassified_Arthropoda_sp	0.03	0	0	0	0	0	0	0	0	0	0	0	0	0	0	0	0	0	0	0	0	0	0	0	0	0	0	0	0	2	0	0	0	0	0
2ed9528fd4ca5281afcfd03408bb6d9863e9ad25	#N/A	Metazoa	0.98	Arthropoda	0.86	unclassified_Arthropoda	0.51	unclassified_Arthropoda	0.05	unclassified_Arthropoda	0.03	unclassified_Arthropoda	0.03	unclassified_Arthropoda_sp	0.02	0	0	0	0	0	0	0	0	0	0	0	0	0	0	0	3	5	0	0	0	0	0	0	0	0	0	0	0	0	0	0	0	0	0
d2427d405e4d42b1beca25b8fc20164be65a9103	#N/A	Metazoa	0.99	Arthropoda	0.94	unclassified_Arthropoda	0.69	unclassified_Arthropoda	0.13	unclassified_Arthropoda	0.03	unclassified_Arthropoda	0.03	unclassified_Arthropoda_sp	0.02	0	0	0	0	0	0	0	0	0	0	0	0	3	0	0	0	0	0	0	0	0	0	0	0	0	0	0	0	2	0	0	0	0	0
0c4aad906746b31aef842a14e7b48ff349dad83d	#N/A	Metazoa	0.94	Arthropoda	0.81	unclassified_Arthropoda	0.32	unclassified_Arthropoda	0.24	unclassified_Arthropoda	0.02	unclassified_Arthropoda	0.02	unclassified_Arthropoda_sp	0.02	0	0	0	0	2	0	0	0	0	0	0	0	0	0	0	0	0	0	2	5	0	0	0	0	0	0	0	0	0	0	0	0	2	0
0ebf8009b04551f80244ef05da215836196ff6f5	#N/A	Metazoa	1	Arthropoda	0.98	unclassified_Arthropoda	0.73	unclassified_Arthropoda	0.39	unclassified_Arthropoda	0.08	unclassified_Arthropoda	0.02	unclassified_Arthropoda_sp	0.02	0	0	0	2	0	0	0	0	0	0	0	0	0	0	0	0	0	0	0	0	0	0	0	0	0	0	0	0	0	0	0	0	0	0
186bce37f5e384593928e9acde157fab05260ee0	#N/A	Metazoa	1	Arthropoda	0.85	unclassified_Arthropoda	0.08	unclassified_Arthropoda	0.04	unclassified_Arthropoda	0.03	unclassified_Arthropoda	0.02	unclassified_Arthropoda_sp	0.02	0	0	0	0	0	0	0	0	0	0	0	0	0	0	0	0	0	0	0	0	0	0	0	0	0	0	0	0	0	0	0	0	0	0
1eb2658081ecd2e015f1ea2cca1a661ea56b84fc	#N/A	Metazoa	1	Arthropoda	0.89	unclassified_Arthropoda	0.67	unclassified_Arthropoda	0.21	unclassified_Arthropoda	0.02	unclassified_Arthropoda	0.02	unclassified_Arthropoda_sp	0.02	0	0	0	0	0	0	0	0	0	0	0	0	0	0	0	0	0	0	0	0	0	0	0	0	0	0	0	2	0	0	0	0	0	0
2a7e510378e04583b24fccb035e0d58fd8b5ab85	#N/A	Metazoa	1	Arthropoda	0.83	unclassified_Arthropoda	0.57	unclassified_Arthropoda	0.14	unclassified_Arthropoda	0.03	unclassified_Arthropoda	0.02	unclassified_Arthropoda_sp	0.02	0	0	0	0	0	0	0	0	0	0	0	0	0	2	0	0	0	0	0	0	0	0	0	0	0	0	0	0	0	0	0	0	0	0
39c4e3e4f7a675ce76612fd436dd4e5164aff392	#N/A	Metazoa	1	Arthropoda	0.8	unclassified_Arthropoda	0.18	unclassified_Arthropoda	0.06	unclassified_Arthropoda	0.02	unclassified_Arthropoda	0.02	unclassified_Arthropoda_sp	0.02	0	0	2	2	0	0	0	0	0	0	0	8	0	0	10	15	3	0	0	0	0	2	0	0	0	0	0	0	0	0	0	0	0	3
40316babd5d466e0ad1e7a74081890854ddf3c0c	#N/A	Metazoa	0.99	Arthropoda	0.93	unclassified_Arthropoda	0.77	unclassified_Arthropoda	0.13	unclassified_Arthropoda	0.02	unclassified_Arthropoda	0.02	unclassified_Arthropoda_sp	0.02	0	0	0	0	0	0	0	0	0	0	0	0	0	0	0	0	0	0	0	0	0	0	0	0	0	0	0	0	0	0	3	3	0	0
53729e181e5716a02fa4de38b4b4a8ee82c241b4	#N/A	Metazoa	0.94	Arthropoda	0.91	unclassified_Arthropoda	0.67	unclassified_Arthropoda	0.2	unclassified_Arthropoda	0.1	unclassified_Arthropoda	0.02	unclassified_Arthropoda_sp	0.02	0	0	0	0	0	0	0	0	0	0	0	0	0	0	0	0	0	0	0	0	0	0	0	0	0	0	0	0	0	0	2	0	0	0
70f848e159d264dc8062784b95c1e95f616ac523	#N/A	Metazoa	1	Arthropoda	0.93	unclassified_Arthropoda	0.19	unclassified_Arthropoda	0.05	unclassified_Arthropoda	0.02	unclassified_Arthropoda	0.02	unclassified_Arthropoda_sp	0.02	0	0	0	0	0	0	0	2	0	0	0	0	0	0	0	0	0	0	0	0	0	0	0	0	0	0	0	0	0	0	0	0	0	0
878ad23ee8c89874f7cd832d7c68c6cc3183bc08	#N/A	Metazoa	0.99	Arthropoda	0.87	unclassified_Arthropoda	0.69	unclassified_Arthropoda	0.17	unclassified_Arthropoda	0.02	unclassified_Arthropoda	0.02	unclassified_Arthropoda_sp	0.02	0	0	0	0	0	0	0	0	0	0	0	0	0	0	0	0	0	0	0	0	0	0	0	0	0	0	0	0	0	0	0	0	0	0
88f9550e24752619a4593a384ec0e0ba34bbcfa9	#N/A	Metazoa	0.96	Arthropoda	0.84	unclassified_Arthropoda	0.63	unclassified_Arthropoda	0.3	unclassified_Arthropoda	0.05	unclassified_Arthropoda	0.02	unclassified_Arthropoda_sp	0.02	0	3	0	0	0	0	0	0	0	0	0	0	0	0	0	0	0	0	0	0	0	0	0	0	0	0	0	0	0	0	0	0	0	0
8b60001b9158d70984f28b2851b3c98767d7555a	#N/A	Metazoa	1	Arthropoda	0.81	unclassified_Arthropoda	0.53	unclassified_Arthropoda	0.16	unclassified_Arthropoda	0.09	unclassified_Arthropoda	0.02	unclassified_Arthropoda_sp	0.02	0	0	0	5	0	0	0	0	0	0	0	59	75	0	0	3	0	10	0	0	0	0	0	0	0	0	0	0	0	3	0	0	0	0
8b7d8d8e18f6ba0e68e9d9c2264b76d9a8ca4d70	#N/A	Metazoa	1	Arthropoda	0.91	unclassified_Arthropoda	0.61	unclassified_Arthropoda	0.06	unclassified_Arthropoda	0.03	unclassified_Arthropoda	0.02	unclassified_Arthropoda_sp	0.02	0	0	0	0	0	0	0	0	0	0	0	0	0	0	0	0	0	0	0	0	0	0	0	0	0	0	0	0	0	0	0	0	0	0
8f0982402edfd395758d3ca0e97ed9c8d1e286c5	#N/A	Metazoa	0.99	Arthropoda	0.9	unclassified_Arthropoda	0.56	unclassified_Arthropoda	0.14	unclassified_Arthropoda	0.04	unclassified_Arthropoda	0.02	unclassified_Arthropoda_sp	0.02	0	0	0	0	0	0	0	0	0	0	0	0	0	0	0	0	0	0	0	0	0	0	0	0	0	0	0	0	0	0	0	0	0	0
92918e0fc2159f185a6f060b1b58ebaf704386b8	#N/A	Metazoa	0.93	Arthropoda	0.8	unclassified_Arthropoda	0.35	unclassified_Arthropoda	0.07	unclassified_Arthropoda	0.02	unclassified_Arthropoda	0.02	unclassified_Arthropoda_sp	0.02	3	0	0	2	0	0	0	0	0	0	0	6	0	13	0	12	0	13	22	26	42	22	6	0	0	0	0	0	0	0	0	0	0	0
9d38bfdee6791052373627fe3c52ef3abc67fb6f	#N/A	Metazoa	0.96	Arthropoda	0.82	unclassified_Arthropoda	0.36	unclassified_Arthropoda	0.04	unclassified_Arthropoda	0.03	unclassified_Arthropoda	0.02	unclassified_Arthropoda_sp	0.02	4	8	0	0	16	0	0	0	0	0	0	0	0	0	0	0	0	0	0	0	0	0	0	0	0	0	0	0	0	2	0	0	0	0
c0a0ea6c93fa221d5ce28d81ed7e73ad774ded0f	#N/A	Metazoa	1	Arthropoda	0.89	unclassified_Arthropoda	0.18	unclassified_Arthropoda	0.11	unclassified_Arthropoda	0.04	unclassified_Arthropoda	0.02	unclassified_Arthropoda_sp	0.02	0	0	0	0	0	0	0	5	0	0	0	0	0	0	0	0	0	0	0	0	0	0	0	0	0	0	0	0	0	0	0	0	0	0
cafd20b39e34f9c22e0e95219b80568b3528087c	#N/A	Metazoa	1	Arthropoda	0.83	unclassified_Arthropoda	0.78	unclassified_Arthropoda	0.21	unclassified_Arthropoda	0.04	unclassified_Arthropoda	0.02	unclassified_Arthropoda_sp	0.02	0	0	0	0	0	0	0	0	0	0	0	0	0	0	0	0	0	0	0	0	0	0	0	0	0	0	0	0	0	2	0	0	0	0
cc71293f6dd8a9c819de78f2f33868bb660ec81c	#N/A	Metazoa	0.98	Arthropoda	0.92	unclassified_Arthropoda	0.14	unclassified_Arthropoda	0.12	unclassified_Arthropoda	0.06	unclassified_Arthropoda	0.02	unclassified_Arthropoda_sp	0.02	0	0	0	0	2	0	0	0	0	0	0	0	0	0	0	0	0	0	0	0	0	0	0	0	0	0	0	0	0	0	0	0	0	0
d723882008057cb176cc17fdd9041070e5b13143	#N/A	Metazoa	1	Arthropoda	0.88	unclassified_Arthropoda	0.59	unclassified_Arthropoda	0.23	unclassified_Arthropoda	0.03	unclassified_Arthropoda	0.02	unclassified_Arthropoda_sp	0.02	0	0	0	0	0	0	0	0	0	0	0	0	0	7	2	5	0	0	0	0	0	2	0	0	0	0	0	0	0	2	0	0	0	0
d7ae7cb201993ffe263e1ec232ccf8edc83f3330	#N/A	Metazoa	0.96	Arthropoda	0.85	unclassified_Arthropoda	0.68	unclassified_Arthropoda	0.1	unclassified_Arthropoda	0.05	unclassified_Arthropoda	0.02	unclassified_Arthropoda_sp	0.02	0	0	0	0	0	0	0	0	0	0	0	0	0	0	0	0	0	0	0	3	0	0	0	0	0	0	0	0	0	0	0	0	0	0
ef89cbe249a7beda37a11ccb772a6d25d54d939b	#N/A	Metazoa	0.97	Arthropoda	0.9	unclassified_Arthropoda	0.63	unclassified_Arthropoda	0.08	unclassified_Arthropoda	0.02	unclassified_Arthropoda	0.02	unclassified_Arthropoda_sp	0.02	0	0	0	0	0	0	0	0	0	0	0	0	0	0	0	0	0	0	0	0	0	0	0	0	0	0	0	0	0	0	0	2	0	0
fdf269ac41ddb1439bfa9832871dbea9e96e3b3b	#N/A	Metazoa	1	Arthropoda	0.81	unclassified_Arthropoda	0.7	unclassified_Arthropoda	0.18	unclassified_Arthropoda	0.02	unclassified_Arthropoda	0.02	unclassified_Arthropoda_sp	0.02	4	0	0	0	0	0	6	4	0	3	3	0	0	0	0	0	0	2	0	0	0	0	0	13	4	36	0	19	0	0	91	4	0	0
a7f48041da3f9e7210e9484ec615379d0a53ef71	#N/A	Metazoa	0.97	Arthropoda	0.9	unclassified_Arthropoda	0.76	unclassified_Arthropoda	0.29	unclassified_Arthropoda	0.12	unclassified_Arthropoda	0.02	unclassified_Arthropoda_sp	0.01	0	0	0	0	0	0	0	0	0	0	0	0	0	0	0	0	0	0	0	0	0	0	0	0	0	0	0	0	0	0	0	3	0	0
0023dd3d84cb22bb12cf1331fc9abf82ed6c794c	#N/A	Metazoa	1	Arthropoda	0.94	unclassified_Arthropoda	0.78	unclassified_Arthropoda	0.14	unclassified_Arthropoda	0.02	unclassified_Arthropoda	0.01	unclassified_Arthropoda_sp	0.01	0	2	0	0	0	0	0	0	0	0	0	0	0	0	0	0	0	0	0	0	0	0	0	0	0	0	0	0	0	0	0	0	0	0
060f29ff5a7d16b7a1e48b90b149272de8d05c12	#N/A	Metazoa	1	Arthropoda	0.99	unclassified_Arthropoda	0.77	unclassified_Arthropoda	0.17	unclassified_Arthropoda	0.01	unclassified_Arthropoda	0.01	unclassified_Arthropoda_sp	0.01	2	9	0	0	16	0	0	0	0	0	0	0	0	0	25	0	0	0	0	0	0	0	4	0	0	0	0	0	9	17	62	139	0	7
0c197ef787b5cd41b74c5efb97413c88e263feb6	#N/A	Metazoa	0.98	Arthropoda	0.96	unclassified_Arthropoda	0.64	unclassified_Arthropoda	0.27	unclassified_Arthropoda	0.14	unclassified_Arthropoda	0.01	unclassified_Arthropoda_sp	0.01	0	0	0	3	0	0	0	0	0	0	0	0	0	0	0	0	0	0	0	0	0	0	0	0	0	0	0	0	0	0	0	0	0	0
15d095e4f3eb4feae89f3a787590fa4dad9ba580	#N/A	Metazoa	0.98	Arthropoda	0.86	unclassified_Arthropoda	0.47	unclassified_Arthropoda	0.04	unclassified_Arthropoda	0.01	unclassified_Arthropoda	0.01	unclassified_Arthropoda_sp	0.01	68	0	30	57	69	33	71	462	0	0	0	0	0	0	0	0	0	22	0	0	0	0	0	0	0	0	0	0	0	40	77	6788	0	428
2880d3c55b5f0cba926f482f41134d3601528f8c	#N/A	Metazoa	1	Arthropoda	0.96	unclassified_Arthropoda	0.48	unclassified_Arthropoda	0.42	unclassified_Arthropoda	0.04	unclassified_Arthropoda	0.01	unclassified_Arthropoda_sp	0.01	0	0	0	0	0	0	0	0	0	0	0	0	0	0	6	0	0	0	0	0	0	0	0	0	0	0	0	0	0	0	0	0	0	0
3249e7656cfb49745f0d71fc4e774257517a4e9e	#N/A	Metazoa	0.98	Arthropoda	0.81	unclassified_Arthropoda	0.22	unclassified_Arthropoda	0.08	unclassified_Arthropoda	0.04	unclassified_Arthropoda	0.01	unclassified_Arthropoda_sp	0.01	0	0	0	0	0	0	0	0	0	0	0	0	0	0	0	0	0	0	0	0	0	0	0	0	3	0	0	0	0	0	0	0	0	0
3423dbbe856b8b0250002b843401ef0fc04f07a4	#N/A	Metazoa	0.99	Arthropoda	0.8	unclassified_Arthropoda	0.6	unclassified_Arthropoda	0.13	unclassified_Arthropoda	0.03	unclassified_Arthropoda	0.01	unclassified_Arthropoda_sp	0.01	0	0	0	0	0	0	0	0	0	0	0	0	0	0	0	0	18	0	0	0	0	0	0	0	0	0	0	0	0	0	0	0	0	0
3e7aaa665e4789a3f0a28f88eb73a7eb0620d671	#N/A	Metazoa	1	Arthropoda	0.91	unclassified_Arthropoda	0.71	unclassified_Arthropoda	0.16	unclassified_Arthropoda	0.01	unclassified_Arthropoda	0.01	unclassified_Arthropoda_sp	0.01	0	0	0	0	0	0	0	0	0	0	0	14	0	0	0	0	0	0	0	0	0	0	0	0	0	0	0	0	0	0	0	0	0	0
4a32b4ad03383371424a2e65a73837e194d1d1ed	#N/A	Metazoa	0.96	Arthropoda	0.89	unclassified_Arthropoda	0.74	unclassified_Arthropoda	0.11	unclassified_Arthropoda	0.04	unclassified_Arthropoda	0.01	unclassified_Arthropoda_sp	0.01	0	0	0	0	0	0	0	0	0	0	0	0	0	0	0	0	0	0	0	0	0	0	0	13	0	0	0	0	0	0	0	0	0	0
51c44e21ae17bb207ddbe0cee728b51f5a7469f9	#N/A	Metazoa	0.99	Arthropoda	0.84	unclassified_Arthropoda	0.56	unclassified_Arthropoda	0.2	unclassified_Arthropoda	0.04	unclassified_Arthropoda	0.01	unclassified_Arthropoda_sp	0.01	55	96	0	143	86	10	95	158	8	0	27	0	7	258	130	170	247	22	0	426	9	0	0	0	0	0	0	0	0	58	10	0	9	0
53e2c10d5621ee0aebe0bc7ca58a6e8e2f49cec4	#N/A	Metazoa	1	Arthropoda	0.92	unclassified_Arthropoda	0.78	unclassified_Arthropoda	0.24	unclassified_Arthropoda	0.08	unclassified_Arthropoda	0.01	unclassified_Arthropoda_sp	0.01	0	0	0	0	0	0	0	0	0	0	0	0	18	0	3	3	12	0	4	28	0	0	0	0	0	0	0	0	0	0	0	0	0	0
55b0babe11661e612287d8390a75438216b3bdf6	#N/A	Metazoa	0.92	Arthropoda	0.84	unclassified_Arthropoda	0.52	unclassified_Arthropoda	0.05	unclassified_Arthropoda	0.01	unclassified_Arthropoda	0.01	unclassified_Arthropoda_sp	0.01	0	0	0	0	0	0	0	0	0	0	0	0	0	0	0	0	0	0	0	0	0	0	0	0	0	0	0	0	0	0	0	0	0	0
8087b5a90642a56c12048a02358ef84e9ff135e5	#N/A	Metazoa	0.97	Arthropoda	0.88	unclassified_Arthropoda	0.71	unclassified_Arthropoda	0.13	unclassified_Arthropoda	0.01	unclassified_Arthropoda	0.01	unclassified_Arthropoda_sp	0.01	0	0	0	0	0	0	0	0	0	0	0	0	0	0	0	0	2	0	0	0	0	0	0	0	0	0	0	0	0	0	0	0	0	0
845d8775d248d14a7e36acfa60a8c0f287daee47	#N/A	Metazoa	0.98	Arthropoda	0.81	unclassified_Arthropoda	0.46	unclassified_Arthropoda	0.04	unclassified_Arthropoda	0.02	unclassified_Arthropoda	0.01	unclassified_Arthropoda_sp	0.01	0	0	0	0	0	0	0	0	0	0	0	0	0	0	0	0	0	0	0	0	0	0	0	0	0	0	6	0	0	0	0	0	0	0
b441c0dee431f76afbc78dfad7354b07a3532066	#N/A	Metazoa	0.99	Arthropoda	0.87	unclassified_Arthropoda	0.7	unclassified_Arthropoda	0.13	unclassified_Arthropoda	0.01	unclassified_Arthropoda	0.01	unclassified_Arthropoda_sp	0.01	0	0	0	0	0	0	0	3	0	0	0	0	0	0	0	0	0	0	0	0	0	0	0	0	0	0	0	0	0	0	0	0	0	0
b758756af80000e9b9d1fdd00d0bfd6ad887a8d2	#N/A	Metazoa	0.94	Arthropoda	0.82	unclassified_Arthropoda	0.52	unclassified_Arthropoda	0.38	unclassified_Arthropoda	0.02	unclassified_Arthropoda	0.01	unclassified_Arthropoda_sp	0.01	0	0	0	0	0	0	0	0	0	0	0	0	0	0	0	0	0	5	0	0	0	0	0	0	0	0	0	0	0	0	0	0	0	0
c4326637b8bafb56a181988bc70e81a3fa84887f	#N/A	Metazoa	1	Arthropoda	0.99	unclassified_Arthropoda	0.78	unclassified_Arthropoda	0.14	unclassified_Arthropoda	0.02	unclassified_Arthropoda	0.01	unclassified_Arthropoda_sp	0.01	0	0	0	0	0	0	0	0	0	0	0	0	0	0	0	0	0	0	0	0	0	0	0	0	0	0	0	0	0	0	0	0	0	4
d4f143420731d399ba73a899b5c368aa6fed013c	#N/A	Metazoa	1	Arthropoda	0.83	unclassified_Arthropoda	0.64	unclassified_Arthropoda	0.12	unclassified_Arthropoda	0.01	unclassified_Arthropoda	0.01	unclassified_Arthropoda_sp	0.01	0	0	0	0	4	0	0	0	0	0	0	0	0	0	0	0	0	0	0	0	0	0	0	0	0	0	0	0	0	0	0	0	0	0
e511845405e11a493c4ea93af2aab311138c67e5	#N/A	Metazoa	0.98	Arthropoda	0.84	unclassified_Arthropoda	0.45	unclassified_Arthropoda	0.11	unclassified_Arthropoda	0.02	unclassified_Arthropoda	0.01	unclassified_Arthropoda_sp	0.01	0	0	0	0	0	0	0	0	0	0	0	0	0	0	0	0	0	0	0	0	0	0	0	0	0	0	0	0	0	0	0	30	0	0
ee6fb725b881ebdefc0100566d3070f82cfa394b	#N/A	Metazoa	0.99	Arthropoda	0.92	unclassified_Arthropoda	0.6	unclassified_Arthropoda	0.22	unclassified_Arthropoda	0.02	unclassified_Arthropoda	0.01	unclassified_Arthropoda_sp	0.01	2	0	0	0	0	0	0	0	0	0	0	0	0	0	0	0	0	0	0	0	0	0	0	0	0	0	0	0	0	0	0	0	0	0
f2b2cc291b06914019b5f2cd77c5792ca62c62fd	#N/A	Metazoa	0.99	Arthropoda	0.94	unclassified_Arthropoda	0.77	unclassified_Arthropoda	0.2	unclassified_Arthropoda	0.01	unclassified_Arthropoda	0.01	unclassified_Arthropoda_sp	0.01	0	0	0	0	0	0	0	0	0	0	0	0	0	0	0	0	0	0	0	0	0	0	0	0	0	0	0	0	0	0	0	2	0	0
f3a1d6fbc03961ba151d517d43701b3517dd958e	#N/A	Metazoa	1	Arthropoda	0.87	unclassified_Arthropoda	0.5	unclassified_Arthropoda	0.45	unclassified_Arthropoda	0.08	unclassified_Arthropoda	0.01	unclassified_Arthropoda_sp	0.01	0	0	0	0	0	0	0	0	0	0	0	0	0	0	0	0	0	0	0	2	0	0	0	0	0	0	0	0	0	0	0	0	0	0
1f8cb2a7d7d0a64f0653ebdd383664e06ab8b936	#N/A	Metazoa	1	Arthropoda	0.87	unclassified_Arthropoda	0.66	unclassified_Arthropoda	0.06	unclassified_Arthropoda	0.01	unclassified_Arthropoda	0	unclassified_Arthropoda_sp	0	0	0	0	0	0	0	0	0	0	0	0	0	0	4	0	0	0	0	0	0	0	0	0	0	0	0	0	0	0	0	0	0	0	0
2bb81ba44f664bbc0d135909deb707431204a78e	#N/A	Metazoa	1	Arthropoda	0.85	unclassified_Arthropoda	0.69	unclassified_Arthropoda	0.16	unclassified_Arthropoda	0	unclassified_Arthropoda	0	unclassified_Arthropoda_sp	0	0	0	0	0	0	0	0	0	0	0	0	0	0	0	0	0	0	0	0	0	0	0	0	0	0	0	0	0	0	0	0	0	2	0
2d5c31b548cfb1db4bbc679ce478b4aecfe02971	#N/A	Metazoa	0.94	Arthropoda	0.8	unclassified_Arthropoda	0.57	unclassified_Arthropoda	0.08	unclassified_Arthropoda	0.05	unclassified_Arthropoda	0	unclassified_Arthropoda_sp	0	0	0	0	0	0	0	0	0	0	0	0	0	0	0	0	0	0	0	0	0	0	0	0	0	0	0	0	0	2	0	0	0	0	0
3e467dd3e80d36be3f996412a1b3cb0697c86ed6	#N/A	Metazoa	0.94	Arthropoda	0.84	unclassified_Arthropoda	0.58	unclassified_Arthropoda	0.19	unclassified_Arthropoda	0.12	unclassified_Arthropoda	0	unclassified_Arthropoda_sp	0	0	0	0	0	0	0	0	0	0	0	0	0	0	0	0	0	0	0	0	0	0	2	0	0	0	0	0	0	0	0	0	0	4	0
913a52d412ab69a0bd9d8da86ab6e0cfe40f1e7e	#N/A	Metazoa	1	Arthropoda	0.91	unclassified_Arthropoda	0.69	unclassified_Arthropoda	0.08	unclassified_Arthropoda	0.01	unclassified_Arthropoda	0	unclassified_Arthropoda_sp	0	0	0	0	0	0	0	0	0	0	2	0	0	0	0	0	0	0	2	0	0	0	0	0	0	0	0	0	0	0	0	2	0	0	0
c63044a38866a1f0339d8d0909bb6463dc35135d	#N/A	Metazoa	0.95	Arthropoda	0.84	unclassified_Arthropoda	0.31	unclassified_Arthropoda	0.09	unclassified_Arthropoda	0.01	unclassified_Arthropoda	0	unclassified_Arthropoda_sp	0	0	0	0	0	0	0	0	0	0	0	0	0	0	0	0	0	0	0	0	0	0	0	0	0	0	0	0	0	0	0	0	0	0	0
e50e2df34d59f5f7d8f351e56b8969a440262feb	#N/A	Metazoa	0.98	Arthropoda	0.84	unclassified_Arthropoda	0.63	unclassified_Arthropoda	0.18	unclassified_Arthropoda	0	unclassified_Arthropoda	0	unclassified_Arthropoda_sp	0	0	0	0	0	0	0	0	0	0	0	0	0	0	0	0	0	0	0	0	0	0	0	0	0	0	0	0	0	0	0	0	0	0	0
bb990105eb48bf67849131d8fe58eb24c2a90914	#N/A	Metazoa	1	Nematoda	1	Chromadorea	1	unclassified_Chromadorea	0.71	unclassified_Chromadorea	0.28	unclassified_Chromadorea	0.28	unclassified_Chromadorea_sp	0.27	0	0	0	0	0	0	0	0	0	0	0	0	0	0	0	0	0	0	0	0	0	0	0	0	0	0	6	0	0	0	0	0	0	0
7704138cd951e26b78be9e1983b240c5db3f8208	#N/A	Metazoa	1	Arthropoda	0.98	Insecta	0.97	Hemiptera	0.86	Cicadellidae	0.82	unclassified_Cicadellidae	0.2	unclassified_Cicadellidae_sp	0.2	0	0	14	0	0	0	0	0	0	0	0	0	0	0	0	0	0	0	0	0	0	0	0	0	0	0	2	0	0	0	0	0	0	0
427d37fa2b271be40cdda1b067536eb7f8aed7f4	#N/A	Metazoa	1	Annelida	0.99	Clitellata	0.99	unclassified_Clitellata	0.77	unclassified_Clitellata	0.77	unclassified_Clitellata	0.76	unclassified_Clitellata_sp	0.76	0	0	0	0	0	0	0	0	0	0	0	0	0	0	0	0	0	8	0	0	0	0	0	0	0	0	0	0	0	0	0	0	0	0
079f10eb98fd3318fa3d08be1049833dace86035	#N/A	Metazoa	1	Annelida	0.86	Clitellata	0.8	unclassified_Clitellata	0.67	unclassified_Clitellata	0.66	unclassified_Clitellata	0.65	unclassified_Clitellata_sp	0.65	0	0	0	0	0	0	0	0	0	0	0	0	0	0	0	0	0	0	0	0	0	0	0	0	0	0	0	0	0	4	0	0	0	0
6b4f286d58a26156fd7dd8dda3e1ec6059f156c1	#N/A	Metazoa	1	Annelida	0.83	Clitellata	0.81	unclassified_Clitellata	0.75	unclassified_Clitellata	0.75	unclassified_Clitellata	0.64	unclassified_Clitellata_sp	0.58	0	0	0	0	0	0	0	0	0	0	0	0	0	0	0	0	0	0	0	0	0	0	0	0	0	0	0	0	0	0	0	0	0	0
5079d6c474203ad380f7be3b349fce3254ff5b56	#N/A	Metazoa	1	Annelida	0.84	Clitellata	0.83	unclassified_Clitellata	0.72	unclassified_Clitellata	0.72	unclassified_Clitellata	0.62	unclassified_Clitellata_sp	0.58	0	0	0	0	0	0	0	19	0	0	4	0	0	0	0	0	0	0	0	0	0	0	0	0	0	0	0	0	0	20	0	0	3	0
73aa5bcef677c7cb85e1187b71a12d685031bdff	#N/A	Metazoa	1	Annelida	0.87	Clitellata	0.87	unclassified_Clitellata	0.71	unclassified_Clitellata	0.71	unclassified_Clitellata	0.53	unclassified_Clitellata_sp	0.11	0	0	0	0	3	0	0	0	0	0	0	0	0	0	0	0	0	0	0	0	0	0	0	0	0	0	0	0	0	0	0	0	3	0
9b237c01272d15c7563d7756d0ddbf88fab8290e	#N/A	Metazoa	1	Annelida	0.86	Clitellata	0.81	unclassified_Clitellata	0.67	unclassified_Clitellata	0.67	unclassified_Clitellata	0.49	unclassified_Clitellata_sp	0.19	0	7	0	2	0	0	0	0	0	0	0	0	0	0	0	0	0	0	0	0	0	0	0	0	3	0	0	0	0	0	29	0	0	0
d10fcf9a74130e9d323ca1e97753a5289a712679	#N/A	Metazoa	1	Annelida	0.88	Clitellata	0.85	unclassified_Clitellata	0.68	unclassified_Clitellata	0.68	unclassified_Clitellata	0.45	unclassified_Clitellata_sp	0.14	0	0	0	0	0	0	0	2	0	0	0	0	0	0	0	0	0	0	0	0	0	0	0	0	0	0	0	0	0	0	0	0	0	0
1a6bb8f066327dfee3be9e80a90ff7b9bd64c506	#N/A	Metazoa	1	Annelida	0.87	Clitellata	0.84	unclassified_Clitellata	0.54	unclassified_Clitellata	0.54	unclassified_Clitellata	0.4	unclassified_Clitellata_sp	0.1	0	0	0	0	0	0	0	0	0	0	0	0	14	0	0	0	0	0	0	0	0	0	0	0	0	0	0	0	0	3	0	0	0	0
fb2dd888c4320c96f03b99fd00d4b020703bfa5b	#N/A	Metazoa	1	Annelida	0.83	Clitellata	0.81	unclassified_Clitellata	0.57	unclassified_Clitellata	0.57	unclassified_Clitellata	0.37	unclassified_Clitellata_sp	0.16	0	0	0	0	0	0	0	0	0	0	0	0	0	0	0	0	0	0	0	0	0	0	0	0	0	0	0	0	0	0	0	0	0	0
6ec415127b41543d9c533d9d5b33b878bd87798b	#N/A	Metazoa	1	Annelida	0.89	Clitellata	0.81	unclassified_Clitellata	0.79	unclassified_Clitellata	0.79	unclassified_Clitellata	0.32	unclassified_Clitellata_sp	0.29	0	0	0	0	0	0	0	0	0	0	0	0	0	0	0	0	0	0	0	0	0	0	0	0	0	0	0	0	0	0	0	0	0	0
599c8336a35f76252b61386e34c9bf42eb226c59	#N/A	Metazoa	1	Annelida	0.88	Clitellata	0.87	unclassified_Clitellata	0.23	unclassified_Clitellata	0.21	unclassified_Clitellata	0.21	unclassified_Clitellata_sp	0.21	2	0	0	0	0	0	0	0	0	0	0	0	0	0	0	0	0	5	0	0	0	2	0	0	0	0	0	3	0	0	0	0	0	0
95418cd8048f03889d0e836063360c4ab3b9d755	#N/A	Metazoa	1	Arthropoda	0.94	Insecta	0.94	Coleoptera	0.85	unclassified_Coleoptera	0.78	unclassified_Coleoptera	0.74	unclassified_Coleoptera_sp	0.25	0	0	0	0	0	0	0	0	0	0	0	0	0	0	0	0	0	0	0	0	0	0	0	0	0	0	0	0	0	0	0	0	0	0
b4bc41b5597a9bba4ecbd0f1681a258f04811e66	#N/A	Metazoa	0.99	Arthropoda	0.99	Collembola	0.8	unclassified_Collembola	0.78	unclassified_Collembola	0.78	unclassified_Collembola	0.78	unclassified_Collembola_sp	0.78	0	0	0	0	0	0	0	0	0	0	0	0	0	0	0	0	0	5	0	0	0	0	0	0	0	0	0	0	0	0	0	0	0	0
cfb9edbf4bbebe72dd2c9309e0103b5b9833eff7	#N/A	Metazoa	1	Arthropoda	1	Insecta	0.99	Diptera	0.87	unclassified_Diptera	0.73	unclassified_Diptera	0.73	unclassified_Diptera_sp	0.41	0	0	0	0	0	0	0	0	0	0	0	4	0	0	0	0	0	0	0	0	0	0	0	0	0	2	0	0	0	0	0	0	0	0
6721b052f7dcee8da1bc3021f41b048209c4c458	#N/A	Metazoa	0.99	Arthropoda	0.99	Insecta	0.97	Diptera	0.8	unclassified_Diptera	0.52	unclassified_Diptera	0.52	unclassified_Diptera_sp	0.41	0	0	0	0	0	0	0	0	0	0	0	0	0	0	0	0	0	0	0	0	0	0	0	0	0	0	0	0	0	0	0	0	0	0
e057af80db06d38efb1f82c464a21920671a69a3	#N/A	Metazoa	1	Arthropoda	1	Insecta	1	Diptera	0.83	unclassified_Diptera	0.66	unclassified_Diptera	0.42	unclassified_Diptera_sp	0.23	0	0	0	0	0	0	0	0	0	0	0	0	0	0	0	0	0	0	0	0	0	0	0	0	0	0	0	0	0	0	0	0	0	0
43dfcc96f7f4743a5d078ce3fdbdf0fbafafc515	#N/A	Metazoa	1	Arthropoda	0.99	Insecta	0.95	Diptera	0.88	unclassified_Diptera	0.12	unclassified_Diptera	0.12	unclassified_Diptera_sp	0.12	0	0	0	0	0	0	0	0	0	0	0	0	0	0	0	0	0	0	0	0	0	0	0	0	0	0	0	0	0	0	0	0	0	0
8f5e5b246369d6db2344a845ae981167a00fd6cf	#N/A	Metazoa	1	Arthropoda	1	Insecta	1	Diptera	0.91	unclassified_Diptera	0.07	unclassified_Diptera	0.07	unclassified_Diptera_sp	0.07	0	0	0	0	0	0	0	0	0	0	0	0	0	0	0	0	0	0	0	0	0	0	0	0	0	0	0	0	0	0	0	0	34	0
3c9a23f1add0aaf53978be615d2430c0b4fb1c16	#N/A	Metazoa	1	Annelida	0.85	Clitellata	0.83	Enchytraeida	0.82	Enchytraeidae	0.82	unclassified_Enchytraeidae	0.79	unclassified_Enchytraeidae_sp	0.77	0	0	0	0	0	0	0	0	0	0	0	0	0	0	0	0	0	0	0	0	0	0	0	0	0	0	0	0	0	0	0	0	0	0
b3157d4ab9cdf575c2ca30746c666774372620cb	#N/A	Metazoa	1	Annelida	0.9	Clitellata	0.89	Enchytraeida	0.81	Enchytraeidae	0.81	unclassified_Enchytraeidae	0.75	unclassified_Enchytraeidae_sp	0.67	0	0	0	0	0	0	0	0	0	2	0	0	0	0	0	0	0	0	0	0	0	0	2	0	0	0	0	0	2	0	0	0	0	0
945f7d084e31c401577903e31adae0174005175a	#N/A	Metazoa	1	Annelida	0.96	Clitellata	0.96	Enchytraeida	0.95	Enchytraeidae	0.95	unclassified_Enchytraeidae	0.71	unclassified_Enchytraeidae_sp	0.71	0	0	0	0	0	0	0	0	0	0	0	0	0	0	0	0	0	3	0	0	0	0	0	0	0	0	0	0	0	0	0	0	0	0
8ed957ac36bfbf9a5384c3fcac8fcfcc29118bfa	#N/A	Metazoa	1	Annelida	0.85	Clitellata	0.83	Enchytraeida	0.81	Enchytraeidae	0.81	unclassified_Enchytraeidae	0.66	unclassified_Enchytraeidae_sp	0.33	0	0	0	19	0	0	0	0	0	0	0	0	0	0	0	0	0	0	0	0	0	0	0	0	0	0	0	0	0	0	0	0	0	0
9de8b57049e9d97dc6b29994a1e6ba46c2795599	#N/A	Metazoa	1	Annelida	0.85	Clitellata	0.83	Enchytraeida	0.82	Enchytraeidae	0.82	unclassified_Enchytraeidae	0.58	unclassified_Enchytraeidae_sp	0.14	0	0	0	0	0	0	0	0	0	0	0	0	0	0	0	0	0	0	0	0	0	0	0	0	0	0	0	0	0	0	0	0	0	0
8c96d9bd417babd5f0e25bc7aaa2d1b435e9e62b	#N/A	Metazoa	1	Annelida	0.88	Clitellata	0.87	Enchytraeida	0.85	Enchytraeidae	0.85	unclassified_Enchytraeidae	0.13	unclassified_Enchytraeidae_sp	0.13	0	0	0	5	72	0	0	25	15	3	59	0	0	0	0	0	266	5	0	0	4	0	4	0	0	0	0	11	6	0	0	66	3	6
e2ff36cf3e2e80db1bc46ebc5db2f06565bb23c8	#N/A	Metazoa	1	Arthropoda	1	Insecta	1	Hemiptera	0.97	unclassified_Hemiptera	0.75	unclassified_Hemiptera	0.75	unclassified_Hemiptera_sp	0.75	0	0	0	0	0	0	0	0	0	0	0	0	0	0	0	0	3	0	0	0	0	0	0	0	0	0	0	0	0	0	0	0	3	0
ddb83c943d4cf9adae071018912d2281c771af49	#N/A	Metazoa	0.93	Arthropoda	0.89	Insecta	0.86	unclassified_Insecta	0.77	unclassified_Insecta	0.77	unclassified_Insecta	0.77	unclassified_Insecta_sp	0.77	0	0	0	2	0	0	0	0	0	0	0	0	0	0	0	0	0	0	0	0	0	0	0	0	0	0	0	0	0	0	0	0	0	0
686c48cbb7a05f9c66c584dee31e408264640f22	#N/A	Metazoa	1	Arthropoda	0.98	Insecta	0.82	unclassified_Insecta	0.64	unclassified_Insecta	0.55	unclassified_Insecta	0.55	unclassified_Insecta_sp	0.55	0	0	0	0	0	0	0	0	0	0	0	0	0	0	0	0	0	0	0	0	0	0	0	0	0	0	0	0	0	0	0	0	0	0
b66a4bf17e5ebacd8f3b9edb1793143eb93c7ae2	#N/A	Metazoa	0.98	Arthropoda	0.9	Insecta	0.84	unclassified_Insecta	0.7	unclassified_Insecta	0.66	unclassified_Insecta	0.42	unclassified_Insecta_sp	0.1	0	0	0	0	0	0	0	0	0	0	0	0	0	0	0	0	0	0	0	0	0	0	0	0	0	0	0	0	0	0	0	0	2	0
798740a020e11f4cfab9f552e924fe30f2c8ce31	#N/A	Metazoa	1	Arthropoda	1	Insecta	0.96	unclassified_Insecta	0.69	unclassified_Insecta	0.44	unclassified_Insecta	0.4	unclassified_Insecta_sp	0.03	0	0	0	0	0	0	0	0	0	0	0	0	0	0	0	0	0	0	0	0	0	0	0	0	0	0	0	0	0	0	0	0	0	0
0954569b1aac5fa738e367b0aeb80295a8925b46	#N/A	Metazoa	1	Arthropoda	1	Insecta	1	unclassified_Insecta	0.59	unclassified_Insecta	0.39	unclassified_Insecta	0.38	unclassified_Insecta_sp	0.16	0	0	0	0	0	18	0	0	0	0	0	0	0	0	0	0	19	34	0	0	0	18	0	20	0	0	0	0	0	0	45	58	33	0
e8912c634bea13cba55fde014f6bc981159f0d3b	#N/A	Metazoa	1	Arthropoda	1	Insecta	0.99	unclassified_Insecta	0.52	unclassified_Insecta	0.42	unclassified_Insecta	0.34	unclassified_Insecta_sp	0.2	0	0	0	0	0	0	0	0	0	0	0	0	0	0	0	0	0	0	0	0	0	0	0	0	0	0	0	0	0	0	0	0	0	0
79407b8b987359a477e7a326a0fde4e8d9ac3f17	#N/A	Metazoa	0.99	Arthropoda	0.98	Insecta	0.96	unclassified_Insecta	0.55	unclassified_Insecta	0.33	unclassified_Insecta	0.32	unclassified_Insecta_sp	0.19	9	0	0	0	0	0	0	0	0	0	0	0	0	0	0	0	0	53	0	0	105	0	0	0	0	0	0	0	0	0	0	0	0	0
deba1d72b6f0db736d6bb878dc1135e6320a4034	#N/A	Metazoa	0.93	Arthropoda	0.86	Insecta	0.8	unclassified_Insecta	0.3	unclassified_Insecta	0.25	unclassified_Insecta	0.25	unclassified_Insecta_sp	0.12	0	0	0	0	0	0	0	0	0	0	0	0	0	0	2	0	0	0	0	0	0	0	0	0	0	0	0	0	0	0	0	0	0	0
894abf5d93ca1138e54c24e97ae330ce81f77b5d	#N/A	Metazoa	1	Arthropoda	0.94	Insecta	0.86	unclassified_Insecta	0.63	unclassified_Insecta	0.43	unclassified_Insecta	0.23	unclassified_Insecta_sp	0.2	0	0	0	0	0	0	0	0	0	0	0	0	0	0	0	0	0	0	0	0	0	0	0	0	0	0	0	0	13	0	0	0	0	0
2b28c3c644f275d1c594ff39242bcf2144a1f922	#N/A	Metazoa	0.99	Arthropoda	0.97	Insecta	0.89	unclassified_Insecta	0.76	unclassified_Insecta	0.69	unclassified_Insecta	0.23	unclassified_Insecta_sp	0.12	0	0	0	0	0	0	0	0	0	0	0	0	0	0	0	0	0	0	0	0	0	0	0	0	0	0	0	0	0	0	0	2	0	0
9d19f4ec9859b65978196e4150b07544d6902995	#N/A	Metazoa	1	Arthropoda	0.98	Insecta	0.93	unclassified_Insecta	0.22	unclassified_Insecta	0.22	unclassified_Insecta	0.22	unclassified_Insecta_sp	0.22	0	0	0	0	0	0	0	0	0	0	0	0	0	0	0	0	0	0	0	0	0	0	0	0	0	0	0	0	0	0	17	0	0	0
9fb0c23e8a22824d4dfdb0edb3801c2261afe258	#N/A	Metazoa	0.84	Arthropoda	0.84	Insecta	0.83	unclassified_Insecta	0.31	unclassified_Insecta	0.2	unclassified_Insecta	0.17	unclassified_Insecta_sp	0.14	0	0	0	0	0	0	0	0	3	0	0	0	0	0	0	0	0	0	0	0	0	0	0	0	0	0	0	0	0	0	0	0	0	0
b7b80922510c024b732c90df40e610c2e77bc5dc	#N/A	Metazoa	0.85	Arthropoda	0.85	Insecta	0.85	unclassified_Insecta	0.35	unclassified_Insecta	0.18	unclassified_Insecta	0.15	unclassified_Insecta_sp	0.13	0	0	0	0	2	0	0	0	0	0	0	0	0	0	0	0	0	0	0	0	0	0	0	0	0	0	0	0	0	0	0	0	0	0
1528daf561fc2d524102601f654c22ae87f78558	#N/A	Metazoa	1	Arthropoda	0.98	Insecta	0.97	unclassified_Insecta	0.23	unclassified_Insecta	0.15	unclassified_Insecta	0.15	unclassified_Insecta_sp	0.04	0	0	0	0	0	0	0	0	0	0	0	0	0	0	0	0	0	0	0	0	0	0	0	0	2	0	0	0	0	0	0	0	0	0
9a56eb794d40313227aba5ec6074dfb3fbebcc53	#N/A	Metazoa	1	Arthropoda	1	Insecta	1	unclassified_Insecta	0.16	unclassified_Insecta	0.14	unclassified_Insecta	0.14	unclassified_Insecta_sp	0.14	0	0	0	0	0	0	0	0	0	0	0	0	0	0	0	0	0	0	0	0	0	0	0	0	0	0	0	0	0	0	0	0	2	0
a5496fd0a87384690e5b146113020e95dd97bdfb	#N/A	Metazoa	1	Arthropoda	1	Insecta	0.98	unclassified_Insecta	0.44	unclassified_Insecta	0.18	unclassified_Insecta	0.11	unclassified_Insecta_sp	0.11	0	0	0	0	0	0	0	0	0	0	0	0	0	0	0	0	0	2	0	0	8	0	0	0	0	0	0	0	0	0	0	0	0	0
e28ce07eabfe96b0be37bb5a32bb3f1405f8a61f	#N/A	Metazoa	0.97	Arthropoda	0.97	Insecta	0.81	unclassified_Insecta	0.25	unclassified_Insecta	0.18	unclassified_Insecta	0.1	unclassified_Insecta_sp	0.1	0	0	0	18	3	29	0	39	0	0	0	0	0	0	3	0	0	0	0	0	0	0	0	0	0	0	0	2	0	0	0	5	3	30
e6e2b589f85e232895380c4c1edd56ad518504b7	#N/A	Metazoa	1	Arthropoda	0.99	Insecta	0.92	unclassified_Insecta	0.22	unclassified_Insecta	0.17	unclassified_Insecta	0.1	unclassified_Insecta_sp	0.1	0	0	0	0	0	0	0	0	0	0	0	0	0	0	0	0	0	0	0	0	0	0	0	0	0	0	0	0	0	0	0	0	0	0
49318f648c2f347e34ff7841605ca48f5fa430a6	#N/A	Metazoa	1	Arthropoda	1	Insecta	0.94	unclassified_Insecta	0.23	unclassified_Insecta	0.11	unclassified_Insecta	0.09	unclassified_Insecta_sp	0.09	4	0	0	0	0	0	0	0	0	0	0	0	0	0	0	0	0	0	0	0	0	0	0	0	0	0	0	0	0	4	0	0	0	0
52b1d371abf263e43b8ace318116d8666b6e7aa7	#N/A	Metazoa	1	Arthropoda	0.92	Insecta	0.84	unclassified_Insecta	0.26	unclassified_Insecta	0.09	unclassified_Insecta	0.09	unclassified_Insecta_sp	0.08	0	0	0	0	0	0	0	0	0	0	0	0	0	0	0	0	0	0	0	0	0	0	0	0	0	0	0	0	0	2	0	0	0	0
9b147769be448cc3d3db9f66ee6dbf226f655f9c	#N/A	Metazoa	1	Arthropoda	0.98	Insecta	0.91	unclassified_Insecta	0.43	unclassified_Insecta	0.23	unclassified_Insecta	0.09	unclassified_Insecta_sp	0.08	0	0	0	0	0	0	0	0	0	0	0	0	0	0	0	0	0	0	0	0	0	0	0	0	0	0	0	0	0	0	0	0	0	0
7395ac10850b62c69179d1eada076bb249589265	#N/A	Metazoa	1	Arthropoda	1	Insecta	1	unclassified_Insecta	0.73	unclassified_Insecta	0.73	unclassified_Insecta	0.09	unclassified_Insecta_sp	0.07	0	0	0	0	0	0	0	0	0	0	0	0	0	0	0	0	0	0	0	0	0	0	0	0	0	0	0	0	0	0	0	4	0	0
7f6d17377a883c4762da30b6d4ec49e6d115bc8c	#N/A	Metazoa	1	Arthropoda	0.97	Insecta	0.91	unclassified_Insecta	0.34	unclassified_Insecta	0.31	unclassified_Insecta	0.08	unclassified_Insecta_sp	0.08	8	0	0	0	0	0	0	0	0	0	0	0	0	0	0	0	0	0	0	0	0	0	0	0	0	0	0	0	0	108	0	0	0	0
7ee90f836fdce40ed8fe2e8d8c0e410a8168e8c1	#N/A	Metazoa	1	Arthropoda	1	Insecta	0.82	unclassified_Insecta	0.15	unclassified_Insecta	0.07	unclassified_Insecta	0.07	unclassified_Insecta_sp	0.07	0	0	0	0	0	0	0	0	0	0	0	4	0	0	0	0	0	0	0	0	0	0	0	0	0	0	0	0	0	0	0	0	0	0
af08439f1885ce3a7d0cf99529e05fea366e3769	#N/A	Metazoa	0.99	Arthropoda	0.99	Insecta	0.85	unclassified_Insecta	0.22	unclassified_Insecta	0.14	unclassified_Insecta	0.07	unclassified_Insecta_sp	0.07	0	0	0	0	0	0	0	0	0	0	0	0	0	0	0	0	0	0	0	0	0	0	0	0	0	0	0	0	0	0	0	0	0	0
b7a175d0e63480305716f4dfa568050c6791fa2d	#N/A	Metazoa	1	Arthropoda	1	Insecta	0.98	unclassified_Insecta	0.4	unclassified_Insecta	0.23	unclassified_Insecta	0.06	unclassified_Insecta_sp	0.05	0	0	0	2	0	0	0	0	0	0	0	0	0	0	0	0	0	0	0	0	0	0	0	0	0	0	0	0	0	5	0	3	0	3
506da0ca93df1035bc6b5f8306a6eaae77504607	#N/A	Metazoa	0.98	Arthropoda	0.97	Insecta	0.96	unclassified_Insecta	0.41	unclassified_Insecta	0.27	unclassified_Insecta	0.05	unclassified_Insecta_sp	0.05	0	0	0	0	0	0	0	0	0	0	0	0	0	0	0	0	0	0	0	0	2	0	0	0	0	0	0	0	0	0	0	0	0	0
9fd3aedfdffe12f781657150c452ff3b921fd8dd	#N/A	Metazoa	0.99	Arthropoda	0.97	Insecta	0.81	unclassified_Insecta	0.15	unclassified_Insecta	0.11	unclassified_Insecta	0.05	unclassified_Insecta_sp	0.05	0	0	0	0	0	0	0	0	0	0	0	0	0	0	0	0	0	0	0	0	0	0	0	0	0	0	0	0	0	0	0	0	0	0
dd2c0e147b7b46d53cbbc0cef235b97b875d420e	#N/A	Metazoa	1	Arthropoda	0.95	Insecta	0.82	unclassified_Insecta	0.14	unclassified_Insecta	0.06	unclassified_Insecta	0.05	unclassified_Insecta_sp	0.05	0	0	0	0	0	0	0	0	0	0	0	0	0	0	0	0	0	0	0	0	2	0	0	0	0	0	0	0	0	0	0	0	0	0
736ebefefa39e033eb7f84a2ded2d6fec2fd3e77	#N/A	Metazoa	1	Arthropoda	0.98	Insecta	0.87	unclassified_Insecta	0.06	unclassified_Insecta	0.05	unclassified_Insecta	0.05	unclassified_Insecta_sp	0.03	0	0	0	0	0	0	0	0	0	0	0	0	0	0	0	0	0	0	0	0	0	0	0	0	0	0	0	0	0	0	2	0	0	0
03037d7b88ac0d70d40083cdcab8960fff672644	#N/A	Metazoa	1	Arthropoda	0.99	Insecta	0.92	unclassified_Insecta	0.46	unclassified_Insecta	0.41	unclassified_Insecta	0.04	unclassified_Insecta_sp	0.04	0	0	0	0	0	0	0	0	0	0	0	0	0	0	0	0	0	0	0	0	0	0	0	0	0	0	0	0	0	0	0	0	0	0
54b9f53663dd9c7534e6afa8c41419696fa6dc20	#N/A	Metazoa	1	Arthropoda	0.96	Insecta	0.92	unclassified_Insecta	0.64	unclassified_Insecta	0.34	unclassified_Insecta	0.04	unclassified_Insecta_sp	0.04	0	0	3	0	0	0	0	0	0	0	0	0	0	0	0	0	0	0	0	0	0	0	0	0	0	0	0	0	0	11	0	0	0	0
b67a4a826d6a819f3bbdb0dea4fba6992e46625b	#N/A	Metazoa	1	Arthropoda	0.97	Insecta	0.86	unclassified_Insecta	0.15	unclassified_Insecta	0.09	unclassified_Insecta	0.04	unclassified_Insecta_sp	0.04	0	0	0	0	0	0	0	0	0	0	0	3	0	0	0	3	0	0	0	0	0	0	0	0	0	0	0	0	0	0	0	0	0	0
ebd56bff30eebf9f1da3b940dd58a494f0938938	#N/A	Metazoa	1	Arthropoda	0.95	Insecta	0.83	unclassified_Insecta	0.16	unclassified_Insecta	0.05	unclassified_Insecta	0.04	unclassified_Insecta_sp	0.04	0	0	0	0	0	0	0	0	0	0	0	0	0	0	0	2	0	0	0	0	0	0	0	0	0	0	0	0	0	0	0	0	0	0
d09f7518c5ba8c57791f601166a5d25f3efaf065	#N/A	Metazoa	1	Arthropoda	0.93	Insecta	0.87	unclassified_Insecta	0.3	unclassified_Insecta	0.07	unclassified_Insecta	0.04	unclassified_Insecta_sp	0.01	0	0	0	3	0	64	0	4	0	0	0	0	0	0	0	0	0	4	0	0	3	0	0	0	0	0	0	0	0	5	0	0	32	0
0995686f6395277730e30e1cfa0707c9c97cb7a8	#N/A	Metazoa	1	Arthropoda	0.93	Insecta	0.8	unclassified_Insecta	0.28	unclassified_Insecta	0.05	unclassified_Insecta	0.03	unclassified_Insecta_sp	0.03	0	0	0	16	0	0	0	0	0	0	0	0	0	0	2	0	9	13	0	0	0	2	0	0	0	0	0	0	0	9	4	0	0	8
3aadb551b27b7045c56ce35f44c0166fde4ec354	#N/A	Metazoa	1	Arthropoda	0.96	Insecta	0.81	unclassified_Insecta	0.18	unclassified_Insecta	0.08	unclassified_Insecta	0.03	unclassified_Insecta_sp	0.03	0	0	0	0	0	0	4	0	0	0	0	0	0	0	0	0	0	0	0	0	0	0	0	0	0	0	0	0	0	0	0	0	0	0
738b3fc85d85210d83b62aba57cceb5840c151fb	#N/A	Metazoa	0.99	Arthropoda	0.93	Insecta	0.84	unclassified_Insecta	0.16	unclassified_Insecta	0.05	unclassified_Insecta	0.03	unclassified_Insecta_sp	0.03	0	0	0	0	0	0	0	0	0	0	0	0	0	0	0	0	0	0	0	0	0	0	0	0	0	0	0	0	0	0	0	2	0	0
91460173465594b109da52ea022e515a64e47ee3	#N/A	Metazoa	1	Arthropoda	0.99	Insecta	0.83	unclassified_Insecta	0.17	unclassified_Insecta	0.04	unclassified_Insecta	0.03	unclassified_Insecta_sp	0.03	0	0	0	0	0	0	0	0	0	0	0	0	4	0	0	0	0	0	0	0	0	0	0	0	0	0	0	0	0	0	0	0	0	0
ff07e5cfb5e0b4db350b53fee06bfc6e7e875a60	#N/A	Metazoa	1	Arthropoda	0.98	Insecta	0.82	unclassified_Insecta	0.16	unclassified_Insecta	0.04	unclassified_Insecta	0.03	unclassified_Insecta_sp	0.03	0	0	0	0	0	0	0	0	0	0	0	0	0	0	0	0	0	25	0	0	0	0	0	0	0	0	0	0	0	0	0	0	0	0
2c6f28eefc1160102a64d97a861d6e4dc38a148a	#N/A	Metazoa	1	Arthropoda	0.97	Insecta	0.87	unclassified_Insecta	0.27	unclassified_Insecta	0.03	unclassified_Insecta	0.02	unclassified_Insecta_sp	0.02	0	0	0	0	0	0	0	0	0	0	0	0	0	0	0	0	0	0	2	0	0	0	0	0	0	0	0	0	0	0	0	0	0	0
32d86feb8111b1271938aed41f0ad32b7808897e	#N/A	Metazoa	0.98	Arthropoda	0.94	Insecta	0.83	unclassified_Insecta	0.19	unclassified_Insecta	0.1	unclassified_Insecta	0.02	unclassified_Insecta_sp	0.02	0	0	0	0	0	0	0	0	0	0	0	0	4	0	0	0	0	0	0	0	0	0	0	0	0	0	0	0	0	0	0	0	0	0
3e9219c7b76fd7b41e16dcbda6de17d979f78f66	#N/A	Metazoa	0.98	Arthropoda	0.93	Insecta	0.87	unclassified_Insecta	0.18	unclassified_Insecta	0.02	unclassified_Insecta	0.02	unclassified_Insecta_sp	0.02	0	0	0	0	0	0	0	0	0	0	0	0	0	0	0	0	0	0	0	3	0	0	0	0	0	0	0	0	0	0	0	0	0	0
5a8ea13e0eecc771439280c1f6493b1fc71b8bcc	#N/A	Metazoa	1	Arthropoda	0.93	Insecta	0.85	unclassified_Insecta	0.16	unclassified_Insecta	0.05	unclassified_Insecta	0.02	unclassified_Insecta_sp	0.02	0	0	0	0	0	0	0	0	0	0	0	0	0	0	0	0	0	0	0	0	0	0	0	0	0	0	0	0	0	0	0	0	0	0
ad66ca024b8930ae0e66180224592fba586affe1	#N/A	Metazoa	1	Arthropoda	0.94	Insecta	0.83	unclassified_Insecta	0.07	unclassified_Insecta	0.02	unclassified_Insecta	0.02	unclassified_Insecta_sp	0.01	0	0	0	5	2	0	11	2	0	2	13	0	0	0	0	17	22	4	0	0	0	0	0	0	0	0	0	0	0	8	13	0	50	9
6c70b6df5da58ae4a34a06a797cebc5c6fc37e48	#N/A	Metazoa	1	Arthropoda	0.97	Insecta	0.89	unclassified_Insecta	0.24	unclassified_Insecta	0.04	unclassified_Insecta	0.01	unclassified_Insecta_sp	0.01	0	0	0	0	0	0	0	0	0	0	0	0	0	0	0	0	0	0	0	0	0	0	0	0	0	0	0	0	0	0	0	0	0	0
6f9947fd86573cbbccb341e72d9db1b7fbb833b1	#N/A	Metazoa	1	Arthropoda	0.96	Insecta	0.8	unclassified_Insecta	0.04	unclassified_Insecta	0.01	unclassified_Insecta	0.01	unclassified_Insecta_sp	0.01	0	0	0	0	0	0	0	0	0	0	0	0	0	0	0	0	0	0	0	0	0	0	0	0	0	0	0	0	0	0	0	0	3	0
907f95fe6945b3fdcbdcf8a6cf2283f22a87ac53	#N/A	Metazoa	1	Annelida	0.86	Clitellata	0.83	Crassiclitellata	0.81	Lumbricidae	0.81	unclassified_Lumbricidae	0.78	unclassified_Lumbricidae_sp	0.77	0	0	0	0	0	0	0	0	0	0	0	0	0	0	0	0	0	0	0	0	0	0	0	0	0	0	0	0	0	0	0	2	0	0
160399f07f150cfd07b9f2de4f8c469901de25b8	#N/A	Metazoa	0.89	unclassified_Metazoa	0.73	unclassified_Metazoa	0.73	unclassified_Metazoa	0.73	unclassified_Metazoa	0.73	unclassified_Metazoa	0.73	unclassified_Metazoa_sp	0.73	0	0	0	0	0	0	0	0	0	0	0	0	0	0	0	0	0	0	0	0	0	0	0	0	0	0	0	0	0	0	0	0	0	0
9522a9f584113940ab6a60a403c0d91dda278714	#N/A	Metazoa	0.9	unclassified_Metazoa	0.74	unclassified_Metazoa	0.74	unclassified_Metazoa	0.73	unclassified_Metazoa	0.73	unclassified_Metazoa	0.73	unclassified_Metazoa_sp	0.73	0	0	0	0	0	0	0	0	0	0	0	0	0	0	0	0	0	0	0	0	0	0	0	0	0	0	0	0	0	0	0	0	0	0
e473148693a755e1fc0f9a08bec19415449c60c3	#N/A	Metazoa	0.91	unclassified_Metazoa	0.77	unclassified_Metazoa	0.76	unclassified_Metazoa	0.76	unclassified_Metazoa	0.75	unclassified_Metazoa	0.73	unclassified_Metazoa_sp	0.71	0	0	0	0	0	0	0	0	0	0	0	0	0	0	0	0	0	0	0	0	0	0	0	0	0	0	0	0	0	0	0	0	0	0
b2474bfe912f501baed5bb0c88515d64b6d89ad2	#N/A	Metazoa	0.87	unclassified_Metazoa	0.69	unclassified_Metazoa	0.69	unclassified_Metazoa	0.69	unclassified_Metazoa	0.69	unclassified_Metazoa	0.69	unclassified_Metazoa_sp	0.69	0	0	0	0	0	0	0	0	0	0	0	0	0	0	0	0	0	0	0	0	0	0	0	0	0	0	0	0	0	0	0	15	0	0
53743c42522005627c300ab733aed8c7752a9435	#N/A	Metazoa	0.93	unclassified_Metazoa	0.67	unclassified_Metazoa	0.67	unclassified_Metazoa	0.67	unclassified_Metazoa	0.66	unclassified_Metazoa	0.66	unclassified_Metazoa_sp	0.66	0	0	0	0	0	0	0	0	0	0	0	0	0	0	0	0	0	0	0	0	0	0	3	0	0	0	0	0	0	0	0	0	0	0
11a7cc19ca7b7473d0c60c796533418a51acfa95	#N/A	Metazoa	0.98	unclassified_Metazoa	0.77	unclassified_Metazoa	0.77	unclassified_Metazoa	0.76	unclassified_Metazoa	0.76	unclassified_Metazoa	0.66	unclassified_Metazoa_sp	0.6	0	0	0	0	0	0	0	0	0	0	0	0	0	0	0	0	0	0	0	0	0	0	0	0	0	0	0	0	0	0	0	0	0	0
c2ee4b560c2955b1da29b49ed77644fda9542900	#N/A	Metazoa	0.9	unclassified_Metazoa	0.63	unclassified_Metazoa	0.63	unclassified_Metazoa	0.63	unclassified_Metazoa	0.62	unclassified_Metazoa	0.62	unclassified_Metazoa_sp	0.62	0	0	0	0	0	0	0	0	0	0	0	0	0	0	0	0	0	0	0	0	0	0	0	0	0	0	0	0	0	0	0	0	0	0
fe05e348df91eeb15ac8173f8a4bee5f483ea20c	#N/A	Metazoa	0.91	unclassified_Metazoa	0.61	unclassified_Metazoa	0.61	unclassified_Metazoa	0.61	unclassified_Metazoa	0.61	unclassified_Metazoa	0.61	unclassified_Metazoa_sp	0.61	0	0	0	0	0	0	0	0	0	0	0	0	0	0	0	3	0	0	0	0	0	0	0	0	0	0	0	0	0	0	0	0	0	0
e15174bbd53a63854f83d0ab4e5972e602f3e876	#N/A	Metazoa	1	unclassified_Metazoa	0.78	unclassified_Metazoa	0.75	unclassified_Metazoa	0.67	unclassified_Metazoa	0.67	unclassified_Metazoa	0.59	unclassified_Metazoa_sp	0.49	0	0	0	30	0	0	0	11	0	0	17	0	0	0	0	0	11	9	0	0	0	0	0	0	0	0	0	10	0	85	0	9	59	9
3e987ca69d01b041112609d5116bde1a2579b713	#N/A	Metazoa	1	unclassified_Metazoa	0.78	unclassified_Metazoa	0.76	unclassified_Metazoa	0.71	unclassified_Metazoa	0.71	unclassified_Metazoa	0.59	unclassified_Metazoa_sp	0.17	0	0	0	94	40	0	0	0	0	0	14	0	11	0	12	0	63	70	170	0	321	0	0	14	0	0	11	42	0	387	17	25	73	62
7f093e12194f02fee0067195560e67b667ed8e86	#N/A	Metazoa	0.98	unclassified_Metazoa	0.79	unclassified_Metazoa	0.79	unclassified_Metazoa	0.58	unclassified_Metazoa	0.58	unclassified_Metazoa	0.58	unclassified_Metazoa_sp	0.58	0	0	0	0	0	0	0	0	0	0	0	0	0	0	0	0	0	0	0	0	0	0	0	0	0	0	0	0	0	0	0	0	5	0
c726ce5b4c950d472546627c1d330d69ffdd1e2c	#N/A	Metazoa	0.95	unclassified_Metazoa	0.76	unclassified_Metazoa	0.74	unclassified_Metazoa	0.7	unclassified_Metazoa	0.65	unclassified_Metazoa	0.58	unclassified_Metazoa_sp	0.58	0	0	0	0	0	0	0	0	0	0	0	0	0	0	0	0	0	0	0	0	0	0	0	0	0	0	0	0	0	2	0	0	0	0
b788696813531b5d5accfe19d662904bfe3b239e	#N/A	Metazoa	1	unclassified_Metazoa	0.77	unclassified_Metazoa	0.74	unclassified_Metazoa	0.64	unclassified_Metazoa	0.64	unclassified_Metazoa	0.56	unclassified_Metazoa_sp	0.55	0	0	0	0	0	0	0	3	0	0	0	0	0	0	0	0	0	0	0	0	0	0	0	0	0	0	4	19	0	0	0	0	3	0
faa2d14f62084c46c0795b3d9557902e82a96d47	#N/A	Metazoa	0.99	unclassified_Metazoa	0.58	unclassified_Metazoa	0.56	unclassified_Metazoa	0.55	unclassified_Metazoa	0.55	unclassified_Metazoa	0.52	unclassified_Metazoa_sp	0.43	0	0	0	0	0	0	0	0	0	0	0	0	0	0	0	0	0	0	0	0	0	0	0	0	0	0	0	0	3	0	0	0	0	0
1435c87b7ca4ba2fd8c1517213bb9695621e96a7	#N/A	Metazoa	0.82	unclassified_Metazoa	0.51	unclassified_Metazoa	0.51	unclassified_Metazoa	0.51	unclassified_Metazoa	0.51	unclassified_Metazoa	0.51	unclassified_Metazoa_sp	0.51	0	0	0	0	0	0	0	0	0	0	0	0	0	0	0	0	0	0	0	3	0	0	0	0	0	0	0	0	0	0	0	0	10	0
d4bfd49e1632a266f7fb53606cd267b43f09efb0	#N/A	Metazoa	1	unclassified_Metazoa	0.7	unclassified_Metazoa	0.67	unclassified_Metazoa	0.54	unclassified_Metazoa	0.54	unclassified_Metazoa	0.5	unclassified_Metazoa_sp	0.47	0	0	0	0	0	0	0	0	0	82	0	0	0	0	0	0	0	0	0	0	0	0	0	0	0	0	0	0	0	0	0	0	0	0
32bbdf89a1a101e7558abf2f28314013f079dd10	#N/A	Metazoa	0.96	unclassified_Metazoa	0.65	unclassified_Metazoa	0.63	unclassified_Metazoa	0.56	unclassified_Metazoa	0.56	unclassified_Metazoa	0.49	unclassified_Metazoa_sp	0.35	0	0	0	0	0	0	0	0	0	0	0	0	0	0	0	0	0	0	0	0	0	0	0	0	0	0	0	2	0	0	0	0	0	0
2fa0e6abc2a0bfd28e5d10a68cb46341699fdba7	#N/A	Metazoa	0.82	unclassified_Metazoa	0.48	unclassified_Metazoa	0.48	unclassified_Metazoa	0.48	unclassified_Metazoa	0.48	unclassified_Metazoa	0.48	unclassified_Metazoa_sp	0.48	0	0	0	0	0	0	0	0	0	0	0	0	0	0	0	2	0	0	0	0	0	0	0	0	0	0	0	0	0	0	0	0	0	0
c70687ff0f02f94af4a57fb6ba2a654b4d8a2fc9	#N/A	Metazoa	0.8	unclassified_Metazoa	0.47	unclassified_Metazoa	0.47	unclassified_Metazoa	0.47	unclassified_Metazoa	0.47	unclassified_Metazoa	0.47	unclassified_Metazoa_sp	0.47	0	0	0	0	0	0	0	0	0	0	0	0	0	0	0	0	0	0	0	0	0	0	0	0	0	0	0	0	0	0	0	0	5	0
ff123cc26694e197ad4fc2255e9a000d4af1699c	#N/A	Metazoa	0.9	unclassified_Metazoa	0.47	unclassified_Metazoa	0.47	unclassified_Metazoa	0.47	unclassified_Metazoa	0.47	unclassified_Metazoa	0.47	unclassified_Metazoa_sp	0.47	0	0	0	0	0	0	0	0	0	0	0	0	0	0	0	0	0	0	0	0	0	0	0	0	0	0	0	0	0	0	0	0	0	0
7486086bfb35744147de528818df4f0e8a09ea92	#N/A	Metazoa	1	unclassified_Metazoa	0.6	unclassified_Metazoa	0.6	unclassified_Metazoa	0.53	unclassified_Metazoa	0.53	unclassified_Metazoa	0.45	unclassified_Metazoa_sp	0.37	0	0	0	0	0	0	0	0	0	0	0	0	0	0	0	0	0	0	0	0	0	0	0	0	0	0	0	0	0	0	0	0	0	0
dacc0fd3deea6bfa5058d7ce0c73459aed207caf	#N/A	Metazoa	0.99	unclassified_Metazoa	0.67	unclassified_Metazoa	0.63	unclassified_Metazoa	0.54	unclassified_Metazoa	0.54	unclassified_Metazoa	0.45	unclassified_Metazoa_sp	0.32	0	0	0	0	0	0	0	0	0	0	0	0	0	0	0	0	0	0	0	0	0	0	0	0	0	0	0	0	0	0	0	0	0	0
ad3b8da142f1994c3c7cc7e16c8f1997b3ff66f4	#N/A	Metazoa	0.83	unclassified_Metazoa	0.46	unclassified_Metazoa	0.46	unclassified_Metazoa	0.44	unclassified_Metazoa	0.44	unclassified_Metazoa	0.44	unclassified_Metazoa_sp	0.44	0	0	0	0	0	0	0	0	0	0	0	0	0	0	0	0	0	0	0	0	3	0	0	0	46	106	0	75	111	0	0	0	0	0
89ad5c6ea6438907de3040b5784ca72cf38b31b3	#N/A	Metazoa	1	unclassified_Metazoa	0.74	unclassified_Metazoa	0.72	unclassified_Metazoa	0.59	unclassified_Metazoa	0.59	unclassified_Metazoa	0.44	unclassified_Metazoa_sp	0.15	0	0	0	0	0	0	0	0	0	2	0	0	0	0	0	0	0	0	0	0	0	0	0	13	0	0	0	0	0	7	0	0	0	0
690eae686d85259aabd86735cd4d6aedaeb090a5	#N/A	Metazoa	0.82	unclassified_Metazoa	0.43	unclassified_Metazoa	0.43	unclassified_Metazoa	0.43	unclassified_Metazoa	0.43	unclassified_Metazoa	0.43	unclassified_Metazoa_sp	0.43	0	0	0	0	0	0	0	0	0	0	0	0	0	0	0	0	0	2	0	0	0	0	0	0	0	0	0	0	0	0	0	0	3	0
d68683f82796661e1add34c14cecc0724b3288a9	#N/A	Metazoa	1	unclassified_Metazoa	0.69	unclassified_Metazoa	0.65	unclassified_Metazoa	0.52	unclassified_Metazoa	0.52	unclassified_Metazoa	0.43	unclassified_Metazoa_sp	0.14	3	0	0	0	0	0	0	0	0	0	0	0	0	0	0	0	0	0	0	0	0	0	0	0	0	0	0	0	0	0	0	0	0	0
0d3187046d11f1ab810a1547502625045e315f16	#N/A	Metazoa	0.85	unclassified_Metazoa	0.77	unclassified_Metazoa	0.62	unclassified_Metazoa	0.59	unclassified_Metazoa	0.42	unclassified_Metazoa	0.42	unclassified_Metazoa_sp	0.42	0	0	0	0	0	0	0	0	0	0	0	0	0	0	0	0	0	0	0	0	0	0	0	0	0	0	0	0	0	0	2	0	0	0
22e471f3b4f62559895d3a7b28882740dfeb4cd5	#N/A	Metazoa	0.97	unclassified_Metazoa	0.45	unclassified_Metazoa	0.45	unclassified_Metazoa	0.45	unclassified_Metazoa	0.41	unclassified_Metazoa	0.41	unclassified_Metazoa_sp	0.39	0	0	0	0	0	0	0	0	0	0	0	0	0	0	0	0	0	0	0	0	0	0	0	0	0	0	0	0	0	0	0	0	0	0
d287e53c9e95d4e7dd501d715e0228859cd5d903	#N/A	Metazoa	0.91	unclassified_Metazoa	0.4	unclassified_Metazoa	0.4	unclassified_Metazoa	0.4	unclassified_Metazoa	0.4	unclassified_Metazoa	0.4	unclassified_Metazoa_sp	0.4	0	0	0	0	0	0	0	0	0	0	0	0	27	0	0	0	277	126	0	0	0	0	0	0	0	0	0	0	0	0	0	108	0	0
14740de58cc1b96e236d611035e47892a1b1eab9	#N/A	Metazoa	0.81	unclassified_Metazoa	0.39	unclassified_Metazoa	0.39	unclassified_Metazoa	0.39	unclassified_Metazoa	0.39	unclassified_Metazoa	0.39	unclassified_Metazoa_sp	0.39	0	0	0	0	0	0	0	0	0	0	0	0	0	0	0	0	0	0	0	0	0	0	0	0	0	0	0	0	0	0	2	0	0	0
abbcca4d820d5b898ee0f64df2c0bca03e18101e	#N/A	Metazoa	0.82	unclassified_Metazoa	0.39	unclassified_Metazoa	0.39	unclassified_Metazoa	0.39	unclassified_Metazoa	0.39	unclassified_Metazoa	0.39	unclassified_Metazoa_sp	0.39	0	0	0	0	0	0	17	0	7	0	0	0	0	0	0	0	0	0	0	0	0	0	0	0	0	0	0	0	0	0	0	0	0	0
bfc76de9f7e3fd495322230c16c8f9c38a43be8f	#N/A	Metazoa	1	unclassified_Metazoa	0.38	unclassified_Metazoa	0.38	unclassified_Metazoa	0.38	unclassified_Metazoa	0.38	unclassified_Metazoa	0.38	unclassified_Metazoa_sp	0.38	3	0	0	0	0	0	0	0	0	0	0	0	0	0	0	0	0	0	0	0	0	0	0	0	0	0	0	0	0	0	0	0	0	0
3e1e8b3e971e0f5428236814aba34d63055192a9	#N/A	Metazoa	0.85	unclassified_Metazoa	0.37	unclassified_Metazoa	0.37	unclassified_Metazoa	0.37	unclassified_Metazoa	0.37	unclassified_Metazoa	0.37	unclassified_Metazoa_sp	0.37	0	0	0	0	0	0	0	0	0	0	0	0	0	0	0	11	0	0	0	0	0	0	0	0	0	0	0	0	0	0	0	0	0	0
edeb5350feec5998f9e428af2849dbbe0c5086a8	#N/A	Metazoa	0.83	unclassified_Metazoa	0.5	unclassified_Metazoa	0.47	unclassified_Metazoa	0.47	unclassified_Metazoa	0.37	unclassified_Metazoa	0.37	unclassified_Metazoa_sp	0.28	4	0	0	0	0	0	0	0	0	0	0	0	0	0	0	0	0	0	0	0	0	0	0	0	0	3	0	0	0	0	7	0	0	4
a4767f74a8d32d06a4219e408be9b1800bed6a09	#N/A	Metazoa	0.82	unclassified_Metazoa	0.37	unclassified_Metazoa	0.37	unclassified_Metazoa	0.36	unclassified_Metazoa	0.36	unclassified_Metazoa	0.36	unclassified_Metazoa_sp	0.36	0	0	0	0	0	0	0	0	0	0	0	0	0	0	0	0	0	0	0	0	0	0	0	0	0	0	0	0	0	0	0	0	0	0
193b62918016ba921fb300a5cbf3866be3b4a2cd	#N/A	Metazoa	0.83	unclassified_Metazoa	0.63	unclassified_Metazoa	0.5	unclassified_Metazoa	0.38	unclassified_Metazoa	0.37	unclassified_Metazoa	0.36	unclassified_Metazoa_sp	0.33	0	0	0	0	0	0	0	0	0	0	0	0	0	0	0	0	0	0	0	0	0	0	0	0	0	0	0	0	2	0	0	0	0	0
2767fcd74c92293f4da358045f660358246890d6	#N/A	Metazoa	1	unclassified_Metazoa	0.72	unclassified_Metazoa	0.72	unclassified_Metazoa	0.59	unclassified_Metazoa	0.59	unclassified_Metazoa	0.36	unclassified_Metazoa_sp	0.29	0	0	0	0	2	0	0	0	0	0	0	0	0	0	0	2	0	5	0	0	0	0	0	112	0	0	42	0	0	0	0	0	0	0
cff2e7d45393bbc7b16437e5dd6a8746ea21d19b	#N/A	Metazoa	1	unclassified_Metazoa	0.74	unclassified_Metazoa	0.73	unclassified_Metazoa	0.5	unclassified_Metazoa	0.48	unclassified_Metazoa	0.35	unclassified_Metazoa_sp	0.3	0	0	0	0	0	0	0	0	0	0	0	0	0	0	0	0	0	0	0	0	0	0	0	0	0	0	0	13	107	3	0	0	0	0
0bda337795fad689d54bc470f2a7cf0e94625fc9	#N/A	Metazoa	0.8	unclassified_Metazoa	0.36	unclassified_Metazoa	0.36	unclassified_Metazoa	0.34	unclassified_Metazoa	0.34	unclassified_Metazoa	0.34	unclassified_Metazoa_sp	0.34	0	0	0	0	0	0	0	0	0	0	0	0	0	0	0	0	0	0	0	0	0	0	0	0	0	0	0	11	0	0	0	0	0	0
63740d5ccdb9955d86556ccce178f6824255c2b3	#N/A	Metazoa	0.84	unclassified_Metazoa	0.34	unclassified_Metazoa	0.34	unclassified_Metazoa	0.34	unclassified_Metazoa	0.34	unclassified_Metazoa	0.34	unclassified_Metazoa_sp	0.34	16	0	0	0	0	0	0	0	0	0	0	0	0	0	0	0	0	0	0	0	0	0	0	0	0	0	0	0	0	0	0	0	0	0
c9a01c0fe6c7261658728f8bfa1bead50ef63943	#N/A	Metazoa	0.99	unclassified_Metazoa	0.61	unclassified_Metazoa	0.56	unclassified_Metazoa	0.46	unclassified_Metazoa	0.46	unclassified_Metazoa	0.34	unclassified_Metazoa_sp	0.29	0	0	0	0	0	0	0	0	0	0	3	0	0	0	0	0	0	0	0	0	0	0	0	0	0	0	0	0	0	0	0	0	0	0
8e022b5c9775869d1fd26b1ff3186c2fe4a0bad0	#N/A	Metazoa	1	unclassified_Metazoa	0.35	unclassified_Metazoa	0.33	unclassified_Metazoa	0.32	unclassified_Metazoa	0.32	unclassified_Metazoa	0.32	unclassified_Metazoa_sp	0.32	0	0	0	0	0	0	0	0	0	0	0	0	0	0	0	0	0	0	0	0	0	0	0	0	0	0	0	0	0	0	0	4	0	0
63bd58cc76a449d611718b0f6fca711077159264	#N/A	Metazoa	1	unclassified_Metazoa	0.68	unclassified_Metazoa	0.68	unclassified_Metazoa	0.6	unclassified_Metazoa	0.36	unclassified_Metazoa	0.32	unclassified_Metazoa_sp	0.24	0	0	0	0	0	0	0	0	0	0	0	0	0	0	0	0	0	0	0	0	0	0	0	0	0	0	0	0	0	0	0	0	0	0
e8211728ab713ffcb36d3c5260220979e712a9e2	#N/A	Metazoa	0.81	unclassified_Metazoa	0.66	unclassified_Metazoa	0.58	unclassified_Metazoa	0.52	unclassified_Metazoa	0.41	unclassified_Metazoa	0.31	unclassified_Metazoa_sp	0.27	0	0	0	0	0	0	0	0	0	0	0	3	0	0	0	0	0	0	0	0	0	0	0	0	0	0	0	0	0	0	0	0	0	0
ad94d76ad692814d83e783da5985931d46629bc6	#N/A	Metazoa	1	unclassified_Metazoa	0.75	unclassified_Metazoa	0.67	unclassified_Metazoa	0.58	unclassified_Metazoa	0.58	unclassified_Metazoa	0.31	unclassified_Metazoa_sp	0.12	0	0	0	0	5	0	0	0	0	0	0	0	0	0	0	0	0	0	0	0	0	0	0	0	0	0	0	0	0	0	0	0	0	0
68f62cde8b205f0a9ec3bfc96296ecea5a1cc86d	#N/A	Metazoa	0.82	unclassified_Metazoa	0.3	unclassified_Metazoa	0.3	unclassified_Metazoa	0.3	unclassified_Metazoa	0.3	unclassified_Metazoa	0.3	unclassified_Metazoa_sp	0.3	0	0	0	0	0	0	0	0	0	0	0	0	0	0	0	0	0	0	0	0	0	0	0	0	0	0	0	0	0	0	0	0	0	0
2a8080fea0e955bcf76749ccb67135942a713682	#N/A	Metazoa	0.95	unclassified_Metazoa	0.79	unclassified_Metazoa	0.65	unclassified_Metazoa	0.6	unclassified_Metazoa	0.45	unclassified_Metazoa	0.3	unclassified_Metazoa_sp	0.19	0	0	0	0	0	0	0	0	0	0	0	0	0	0	0	0	0	0	0	0	0	0	0	0	0	0	0	0	0	0	0	0	0	0
3a13566dfeb511150a836c420ec05e6690f9e2c4	#N/A	Metazoa	1	unclassified_Metazoa	0.65	unclassified_Metazoa	0.57	unclassified_Metazoa	0.41	unclassified_Metazoa	0.41	unclassified_Metazoa	0.3	unclassified_Metazoa_sp	0.19	0	0	0	0	0	0	0	0	0	0	0	0	0	0	0	0	0	0	0	0	0	0	0	0	0	0	0	0	0	0	0	0	0	0
75ad6a94f1d113bd6804a2178b2a9776a2a5beb4	#N/A	Metazoa	1	unclassified_Metazoa	0.72	unclassified_Metazoa	0.67	unclassified_Metazoa	0.6	unclassified_Metazoa	0.6	unclassified_Metazoa	0.3	unclassified_Metazoa_sp	0.05	0	0	0	14	3451	76	0	0	13	13	110	0	0	0	0	0	0	18	15	0	0	0	0	0	0	0	0	34	0	41	15	37	0	616
35ced59e93fa4c13399ef2e1ae546ce2084136b0	#N/A	Metazoa	0.83	unclassified_Metazoa	0.29	unclassified_Metazoa	0.29	unclassified_Metazoa	0.29	unclassified_Metazoa	0.29	unclassified_Metazoa	0.29	unclassified_Metazoa_sp	0.29	0	0	0	0	0	0	0	0	0	0	0	0	0	0	0	0	0	0	0	0	0	0	0	0	0	0	0	0	0	0	0	0	0	46
72655f8e841e9622936ca28e8e0f51f7813b6df0	#N/A	Metazoa	0.86	unclassified_Metazoa	0.3	unclassified_Metazoa	0.3	unclassified_Metazoa	0.29	unclassified_Metazoa	0.29	unclassified_Metazoa	0.29	unclassified_Metazoa_sp	0.29	0	0	0	0	0	0	0	0	0	0	0	0	0	0	0	0	0	0	0	0	0	0	0	0	0	0	0	0	0	0	0	0	0	0
e4447ae7aaef7492b4ff84591880fa0dc0cf6e7f	#N/A	Metazoa	1	unclassified_Metazoa	0.72	unclassified_Metazoa	0.7	unclassified_Metazoa	0.63	unclassified_Metazoa	0.63	unclassified_Metazoa	0.29	unclassified_Metazoa_sp	0.14	0	0	0	0	0	0	0	0	0	0	0	0	0	0	0	0	0	0	0	0	0	0	0	0	0	0	0	7	0	0	0	0	0	0
134b564b4d1e45edc54211704c38953461810ecb	#N/A	Metazoa	1	unclassified_Metazoa	0.63	unclassified_Metazoa	0.63	unclassified_Metazoa	0.45	unclassified_Metazoa	0.45	unclassified_Metazoa	0.28	unclassified_Metazoa_sp	0.15	0	0	0	0	0	0	0	0	0	0	0	0	0	0	0	0	0	0	0	0	0	0	0	0	11	0	65	0	0	14	0	0	4	0
7dbb67ae285d815efb1b3418c4a23de3d06b240c	#N/A	Metazoa	0.81	unclassified_Metazoa	0.58	unclassified_Metazoa	0.47	unclassified_Metazoa	0.27	unclassified_Metazoa	0.27	unclassified_Metazoa	0.27	unclassified_Metazoa_sp	0.27	0	0	0	0	0	0	0	0	0	0	0	0	0	0	0	0	0	0	0	0	0	0	0	0	0	0	0	0	0	0	0	0	0	0
91ea5cd3fbecf94c4081c44361e00c95f4c00317	#N/A	Metazoa	0.85	unclassified_Metazoa	0.29	unclassified_Metazoa	0.29	unclassified_Metazoa	0.29	unclassified_Metazoa	0.27	unclassified_Metazoa	0.27	unclassified_Metazoa_sp	0.27	0	0	0	0	0	0	0	0	0	0	0	0	0	0	0	0	0	0	0	0	0	0	0	0	0	0	0	0	0	0	0	0	0	0
c2d56915eb95d49e7426d5c485181b18af5a3129	#N/A	Metazoa	1	unclassified_Metazoa	0.57	unclassified_Metazoa	0.54	unclassified_Metazoa	0.36	unclassified_Metazoa	0.36	unclassified_Metazoa	0.27	unclassified_Metazoa_sp	0.11	0	0	0	0	2	0	0	0	0	0	0	0	0	0	0	0	0	0	0	0	0	0	0	0	0	0	0	0	0	0	0	0	0	11
16f97d225208c5d9078940cded2e4c5d506894e8	#N/A	Metazoa	0.85	unclassified_Metazoa	0.47	unclassified_Metazoa	0.47	unclassified_Metazoa	0.34	unclassified_Metazoa	0.26	unclassified_Metazoa	0.26	unclassified_Metazoa_sp	0.26	0	0	0	0	0	0	0	0	0	0	0	0	0	0	0	0	0	0	0	0	0	0	0	0	0	0	0	0	0	0	6	0	0	0
addb8c48072d117ac992251e70e16e5f6f8fa7a6	#N/A	Metazoa	0.86	unclassified_Metazoa	0.52	unclassified_Metazoa	0.52	unclassified_Metazoa	0.39	unclassified_Metazoa	0.26	unclassified_Metazoa	0.26	unclassified_Metazoa_sp	0.26	0	0	0	0	0	0	0	0	0	0	0	0	0	20	0	0	0	0	0	0	3	0	0	0	0	0	0	0	0	0	0	0	0	0
c76da87a6213dbef5377c0aaa0bd8191c2c42d06	#N/A	Metazoa	0.81	unclassified_Metazoa	0.27	unclassified_Metazoa	0.27	unclassified_Metazoa	0.26	unclassified_Metazoa	0.26	unclassified_Metazoa	0.26	unclassified_Metazoa_sp	0.26	0	0	0	0	0	0	0	0	35	0	0	0	0	0	0	0	0	0	0	0	0	0	0	0	0	0	0	0	0	0	0	0	0	0
87e77a9cb9fde13bd318113be148bd30d696d644	#N/A	Metazoa	1	unclassified_Metazoa	0.46	unclassified_Metazoa	0.42	unclassified_Metazoa	0.31	unclassified_Metazoa	0.31	unclassified_Metazoa	0.26	unclassified_Metazoa_sp	0.12	0	0	0	0	0	0	0	0	0	0	0	0	0	0	0	0	0	0	0	0	0	0	0	0	0	0	0	0	0	0	0	0	44	0
218d9e0204b4276e4ea3c296ffd50baae6e2ef3f	#N/A	Metazoa	0.97	unclassified_Metazoa	0.26	unclassified_Metazoa	0.26	unclassified_Metazoa	0.26	unclassified_Metazoa	0.25	unclassified_Metazoa	0.25	unclassified_Metazoa_sp	0.25	0	0	0	0	0	0	0	0	0	0	0	0	0	0	0	0	2	0	0	0	0	0	0	0	0	0	0	0	0	0	0	0	0	0
03b2a8d7a337f435af9309271c985c88241be55f	#N/A	Metazoa	0.8	unclassified_Metazoa	0.26	unclassified_Metazoa	0.26	unclassified_Metazoa	0.26	unclassified_Metazoa	0.24	unclassified_Metazoa	0.24	unclassified_Metazoa_sp	0.24	0	0	0	0	0	0	0	0	0	0	0	0	0	0	0	0	0	0	0	0	0	0	0	0	0	0	0	0	0	0	0	0	0	0
0607769828a9256ce65ad96a32d2965c302993cd	#N/A	Metazoa	1	unclassified_Metazoa	0.35	unclassified_Metazoa	0.35	unclassified_Metazoa	0.3	unclassified_Metazoa	0.3	unclassified_Metazoa	0.24	unclassified_Metazoa_sp	0.14	0	0	0	0	0	0	0	0	0	0	0	0	0	3	0	0	0	0	0	0	0	0	0	0	0	0	0	0	0	0	0	0	0	0
94d87a80ff2bb37de39f59245a9338671fc53796	#N/A	Metazoa	0.84	unclassified_Metazoa	0.23	unclassified_Metazoa	0.23	unclassified_Metazoa	0.23	unclassified_Metazoa	0.23	unclassified_Metazoa	0.23	unclassified_Metazoa_sp	0.23	0	0	0	0	0	0	0	0	0	0	0	0	0	0	0	0	0	19	0	0	0	0	0	0	0	0	0	0	0	0	0	0	0	0
3ebb555eb0481944df664ba2e3cafa6429f8d479	#N/A	Metazoa	1	unclassified_Metazoa	0.7	unclassified_Metazoa	0.69	unclassified_Metazoa	0.46	unclassified_Metazoa	0.46	unclassified_Metazoa	0.23	unclassified_Metazoa_sp	0.14	0	0	88	220	154	0	0	0	0	0	0	0	187	252	376	0	280	840	1227	240	103	488	163	0	0	0	0	100	0	66	390	277	245	2880
f51b3009d81c463fd4cc9733d2e64a1e531e15f6	#N/A	Metazoa	0.87	unclassified_Metazoa	0.23	unclassified_Metazoa	0.23	unclassified_Metazoa	0.22	unclassified_Metazoa	0.22	unclassified_Metazoa	0.22	unclassified_Metazoa_sp	0.22	0	0	0	0	0	0	0	0	0	0	0	0	0	0	0	0	11	0	0	0	0	0	0	0	0	0	0	0	0	0	0	0	0	0
3b8e55a63259412ac77358d874ada8402e5ece74	#N/A	Metazoa	0.83	unclassified_Metazoa	0.23	unclassified_Metazoa	0.23	unclassified_Metazoa	0.23	unclassified_Metazoa	0.21	unclassified_Metazoa	0.21	unclassified_Metazoa_sp	0.21	0	0	0	0	0	0	0	0	0	0	0	0	0	0	0	28	0	0	0	0	0	6	0	0	0	0	0	0	0	0	0	0	0	0
47a8fe41cf1d43934589618683dc2849c894c760	#N/A	Metazoa	0.86	unclassified_Metazoa	0.71	unclassified_Metazoa	0.21	unclassified_Metazoa	0.21	unclassified_Metazoa	0.21	unclassified_Metazoa	0.21	unclassified_Metazoa_sp	0.21	0	0	0	0	0	0	0	0	0	0	0	0	0	0	0	0	0	0	0	0	0	0	0	0	0	0	0	0	0	0	0	0	0	3
7286328c53c7f9b77298f2261cf0d101e0e95b02	#N/A	Metazoa	0.83	unclassified_Metazoa	0.2	unclassified_Metazoa	0.2	unclassified_Metazoa	0.2	unclassified_Metazoa	0.2	unclassified_Metazoa	0.2	unclassified_Metazoa_sp	0.2	0	0	0	0	0	0	0	0	0	0	0	0	0	0	0	0	0	3	0	0	0	0	0	0	0	0	0	0	0	0	0	0	0	0
971bdf70497ac95af23c25513a193b70823a3bcd	#N/A	Metazoa	0.83	unclassified_Metazoa	0.2	unclassified_Metazoa	0.2	unclassified_Metazoa	0.2	unclassified_Metazoa	0.2	unclassified_Metazoa	0.2	unclassified_Metazoa_sp	0.2	0	0	0	0	0	0	0	0	0	0	0	0	0	0	0	0	0	0	0	0	36	0	0	0	0	0	0	0	0	0	0	0	0	0
c15402bb24ca1c94f8526cfe84e3182046328374	#N/A	Metazoa	0.86	unclassified_Metazoa	0.48	unclassified_Metazoa	0.35	unclassified_Metazoa	0.23	unclassified_Metazoa	0.2	unclassified_Metazoa	0.2	unclassified_Metazoa_sp	0.2	0	0	0	0	0	0	0	0	0	0	0	0	0	0	0	0	0	0	0	3	0	0	0	0	0	0	0	0	0	0	0	0	0	0
5ab9abef7dbf4624bb53f05a0393cb9ed57d8480	#N/A	Metazoa	0.98	unclassified_Metazoa	0.47	unclassified_Metazoa	0.46	unclassified_Metazoa	0.36	unclassified_Metazoa	0.24	unclassified_Metazoa	0.2	unclassified_Metazoa_sp	0.15	0	0	0	2	0	0	0	0	0	0	0	0	0	0	0	0	0	0	0	0	0	0	0	0	0	0	0	0	0	0	0	0	0	0
3d7bcd357e531c827ef688ab8b31dd0bb201a340	#N/A	Metazoa	0.99	unclassified_Metazoa	0.59	unclassified_Metazoa	0.55	unclassified_Metazoa	0.28	unclassified_Metazoa	0.28	unclassified_Metazoa	0.2	unclassified_Metazoa_sp	0.12	0	0	0	0	2	0	0	0	0	0	0	0	0	0	0	0	0	0	0	0	0	0	0	0	0	0	0	0	0	0	0	0	0	0
4b4b481fc0ca6d6c869df9094b91719ef7f9cf06	#N/A	Metazoa	1	unclassified_Metazoa	0.78	unclassified_Metazoa	0.75	unclassified_Metazoa	0.69	unclassified_Metazoa	0.69	unclassified_Metazoa	0.19	unclassified_Metazoa_sp	0.19	0	0	0	0	0	0	0	0	0	0	0	0	0	0	0	0	0	0	0	0	0	0	0	0	0	0	0	0	0	4	0	16	0	0
4cc5f455db5fc6905b7e2a833e5c09a88e65c735	#N/A	Metazoa	0.99	unclassified_Metazoa	0.61	unclassified_Metazoa	0.25	unclassified_Metazoa	0.21	unclassified_Metazoa	0.2	unclassified_Metazoa	0.19	unclassified_Metazoa_sp	0.19	783	0	0	0	48	61	0	482	0	0	174	324	0	0	375	298	265	0	4390	0	5613	362	775	0	0	0	0	0	0	52	103	0	0	0
9746f05cb00e02f57b348027a6c2ed40b9b2f79b	#N/A	Metazoa	0.83	unclassified_Metazoa	0.68	unclassified_Metazoa	0.57	unclassified_Metazoa	0.42	unclassified_Metazoa	0.19	unclassified_Metazoa	0.19	unclassified_Metazoa_sp	0.19	90	0	0	85	5	0	0	0	0	0	0	0	0	0	0	15	0	0	0	0	0	0	0	0	0	0	0	0	0	0	207	43	0	15
978e9622831390906b8989a4e251948242e39ca9	#N/A	Metazoa	0.95	unclassified_Metazoa	0.71	unclassified_Metazoa	0.24	unclassified_Metazoa	0.19	unclassified_Metazoa	0.19	unclassified_Metazoa	0.19	unclassified_Metazoa_sp	0.19	0	0	0	0	0	0	0	5	0	0	0	0	0	0	0	0	0	0	0	0	0	0	0	0	0	0	0	0	0	0	0	0	0	0
3bcd2ff688e4943336cba22b005e46212cb44156	#N/A	Metazoa	0.82	unclassified_Metazoa	0.19	unclassified_Metazoa	0.19	unclassified_Metazoa	0.19	unclassified_Metazoa	0.19	unclassified_Metazoa	0.19	unclassified_Metazoa_sp	0.18	0	0	0	0	0	0	0	0	0	0	0	0	0	0	0	0	0	0	0	0	0	0	0	0	0	0	0	0	2	0	0	0	0	0
7240345f3846943a9030f8adf480b5f0b59debc9	#N/A	Metazoa	1	unclassified_Metazoa	0.71	unclassified_Metazoa	0.69	unclassified_Metazoa	0.28	unclassified_Metazoa	0.24	unclassified_Metazoa	0.19	unclassified_Metazoa_sp	0.16	0	0	0	0	0	0	0	0	0	0	0	0	0	0	0	0	0	0	0	0	0	0	0	0	0	0	0	2	0	0	0	0	0	0
c196bed73bf82645259bb1ad98efe66f9817ee79	#N/A	Metazoa	0.99	unclassified_Metazoa	0.72	unclassified_Metazoa	0.37	unclassified_Metazoa	0.29	unclassified_Metazoa	0.24	unclassified_Metazoa	0.18	unclassified_Metazoa_sp	0.18	0	0	0	0	0	0	0	0	0	0	0	0	0	0	0	0	0	2	0	0	0	0	0	0	0	0	0	0	0	0	0	0	0	0
d3ae43514de7551d2b222e57220123740704fd0e	#N/A	Metazoa	0.8	unclassified_Metazoa	0.7	unclassified_Metazoa	0.57	unclassified_Metazoa	0.25	unclassified_Metazoa	0.18	unclassified_Metazoa	0.18	unclassified_Metazoa_sp	0.18	0	0	0	0	0	0	0	0	0	0	0	0	0	0	0	0	0	2	0	0	0	6	38	0	0	0	0	0	0	0	0	0	0	0
d8f9df711935ba8be57d6a088a6f34e2f3d34c22	#N/A	Metazoa	0.82	unclassified_Metazoa	0.18	unclassified_Metazoa	0.18	unclassified_Metazoa	0.18	unclassified_Metazoa	0.18	unclassified_Metazoa	0.18	unclassified_Metazoa_sp	0.18	0	0	0	0	0	0	0	0	0	0	0	0	0	0	0	0	0	0	0	0	0	25	0	0	0	0	0	0	0	0	0	0	0	0
4dea29714c87660684de89c79b94074fa97c402f	#N/A	Metazoa	0.85	unclassified_Metazoa	0.18	unclassified_Metazoa	0.18	unclassified_Metazoa	0.18	unclassified_Metazoa	0.17	unclassified_Metazoa	0.17	unclassified_Metazoa_sp	0.17	0	0	0	0	0	0	0	0	0	0	0	0	0	0	0	0	0	0	0	0	0	0	0	0	0	0	0	0	0	0	0	0	0	0
5a186f84a4576b7d622460b0aa353241cac958e5	#N/A	Metazoa	0.8	unclassified_Metazoa	0.17	unclassified_Metazoa	0.17	unclassified_Metazoa	0.17	unclassified_Metazoa	0.17	unclassified_Metazoa	0.17	unclassified_Metazoa_sp	0.17	0	14	0	16	0	0	0	0	0	0	0	0	0	0	0	0	0	0	0	0	0	0	0	0	0	0	0	0	0	0	0	0	46	0
0e861304efb24f1bbdff3cc0c87d79bcac34bf44	#N/A	Metazoa	0.84	unclassified_Metazoa	0.17	unclassified_Metazoa	0.17	unclassified_Metazoa	0.17	unclassified_Metazoa	0.17	unclassified_Metazoa	0.16	unclassified_Metazoa_sp	0.16	0	0	0	0	0	0	0	0	0	0	0	0	0	0	0	0	0	0	0	67	0	0	0	0	0	0	0	0	0	0	0	0	0	0
4b50d651dbad60c5681718fe714e8af0d1d54685	#N/A	Metazoa	0.83	unclassified_Metazoa	0.77	unclassified_Metazoa	0.42	unclassified_Metazoa	0.36	unclassified_Metazoa	0.17	unclassified_Metazoa	0.16	unclassified_Metazoa_sp	0.16	0	0	0	0	0	0	0	0	0	0	0	0	0	0	0	0	0	0	0	0	0	0	0	0	0	0	0	0	0	0	11	0	2	0
87bc9dde04a4a69fd497816c59922b5b9a5599e4	#N/A	Metazoa	0.83	unclassified_Metazoa	0.16	unclassified_Metazoa	0.16	unclassified_Metazoa	0.16	unclassified_Metazoa	0.16	unclassified_Metazoa	0.16	unclassified_Metazoa_sp	0.16	0	0	2	0	0	0	0	0	0	0	0	0	0	0	0	0	6	0	0	0	0	0	0	0	0	0	0	0	0	0	0	0	0	0
926829997001dae889e6e5a4ec973d9b5345f41f	#N/A	Metazoa	0.9	unclassified_Metazoa	0.37	unclassified_Metazoa	0.2	unclassified_Metazoa	0.17	unclassified_Metazoa	0.16	unclassified_Metazoa	0.16	unclassified_Metazoa_sp	0.16	0	0	0	0	0	0	0	0	0	0	0	0	0	0	0	3	18	0	0	0	0	0	0	0	0	0	0	0	0	0	0	0	0	0
bf65cec1bf4e79115463e0d25970a64f179648a0	#N/A	Metazoa	0.86	unclassified_Metazoa	0.16	unclassified_Metazoa	0.16	unclassified_Metazoa	0.16	unclassified_Metazoa	0.16	unclassified_Metazoa	0.16	unclassified_Metazoa_sp	0.16	0	0	0	0	0	0	0	0	0	0	0	0	0	0	0	0	0	0	0	0	0	0	0	0	0	0	0	0	0	0	109	0	0	0
f2f470e885fdfe61aa4fc876f9cc817e6c5f7f70	#N/A	Metazoa	0.81	unclassified_Metazoa	0.43	unclassified_Metazoa	0.23	unclassified_Metazoa	0.23	unclassified_Metazoa	0.16	unclassified_Metazoa	0.16	unclassified_Metazoa_sp	0.15	0	0	0	0	0	0	0	0	0	0	0	0	0	0	0	0	0	0	0	0	0	0	0	0	0	0	0	0	0	0	0	0	0	0
ac53091bb84e4574c9e60957d5bd3332c91b2dc3	#N/A	Metazoa	0.99	unclassified_Metazoa	0.79	unclassified_Metazoa	0.45	unclassified_Metazoa	0.36	unclassified_Metazoa	0.18	unclassified_Metazoa	0.16	unclassified_Metazoa_sp	0.1	0	0	0	0	0	0	0	0	0	0	0	17	0	0	0	0	2	0	0	0	0	0	0	0	0	0	0	0	0	0	0	0	0	0
0f81251f6dcf2f861aefa6bb9d463f48a15fe416	#N/A	Metazoa	0.8	unclassified_Metazoa	0.16	unclassified_Metazoa	0.16	unclassified_Metazoa	0.16	unclassified_Metazoa	0.16	unclassified_Metazoa	0.15	unclassified_Metazoa_sp	0.15	0	0	0	0	0	0	0	0	0	0	0	0	0	0	0	0	0	0	0	0	0	0	0	0	0	0	0	0	0	0	0	0	0	0
21478a35116a10a60a12a62213440ad52e85fe8e	#N/A	Metazoa	0.82	unclassified_Metazoa	0.15	unclassified_Metazoa	0.15	unclassified_Metazoa	0.15	unclassified_Metazoa	0.15	unclassified_Metazoa	0.15	unclassified_Metazoa_sp	0.15	0	0	0	0	0	0	0	0	0	0	0	0	0	2	0	0	0	0	0	0	0	0	0	0	0	0	0	0	0	0	0	0	0	0
2db97b34c335f6c0f769f7210f64aefdf4c8161a	#N/A	Metazoa	0.83	unclassified_Metazoa	0.15	unclassified_Metazoa	0.15	unclassified_Metazoa	0.15	unclassified_Metazoa	0.15	unclassified_Metazoa	0.15	unclassified_Metazoa_sp	0.15	0	0	0	0	0	0	0	0	0	0	0	0	0	0	0	0	0	0	0	0	0	0	0	0	0	0	0	0	0	0	0	0	12	0
43f72058bc9237e15f1b1a9d2a29a9f7dd36afde	#N/A	Metazoa	0.96	unclassified_Metazoa	0.59	unclassified_Metazoa	0.34	unclassified_Metazoa	0.26	unclassified_Metazoa	0.2	unclassified_Metazoa	0.15	unclassified_Metazoa_sp	0.15	0	0	0	0	0	0	0	0	0	0	0	0	0	0	0	0	0	0	0	0	0	0	0	0	0	0	0	0	0	0	0	0	0	0
4bce533cb4491919828959aa76049ff9d73b9919	#N/A	Metazoa	0.82	unclassified_Metazoa	0.15	unclassified_Metazoa	0.15	unclassified_Metazoa	0.15	unclassified_Metazoa	0.15	unclassified_Metazoa	0.15	unclassified_Metazoa_sp	0.15	0	0	0	0	0	0	0	0	0	0	0	0	0	0	0	0	0	0	0	0	0	0	0	0	0	0	0	0	0	0	0	0	0	0
7a93bb21d9eff0c926fc4978dcde4df36446fb9a	#N/A	Metazoa	0.81	unclassified_Metazoa	0.15	unclassified_Metazoa	0.15	unclassified_Metazoa	0.15	unclassified_Metazoa	0.15	unclassified_Metazoa	0.15	unclassified_Metazoa_sp	0.15	0	0	0	0	0	0	0	0	0	0	0	0	0	0	0	0	0	0	0	0	0	0	0	0	0	0	0	0	0	0	5	0	0	0
7b8a5e1f8908be39ee1fc5cbab0f6ccf163970fb	#N/A	Metazoa	0.84	unclassified_Metazoa	0.26	unclassified_Metazoa	0.26	unclassified_Metazoa	0.16	unclassified_Metazoa	0.15	unclassified_Metazoa	0.15	unclassified_Metazoa_sp	0.15	0	0	0	0	0	31	0	0	0	0	0	0	0	0	0	0	0	0	0	0	0	0	0	0	0	0	0	0	0	2	2	0	0	0
90bb0216a24371905bfcb6a4de3e4d13dba15bfd	#N/A	Metazoa	0.83	unclassified_Metazoa	0.57	unclassified_Metazoa	0.49	unclassified_Metazoa	0.17	unclassified_Metazoa	0.15	unclassified_Metazoa	0.15	unclassified_Metazoa_sp	0.15	3	0	0	0	0	0	0	0	0	0	0	0	0	0	0	0	0	0	0	0	0	0	0	0	0	0	0	0	0	0	11	0	0	0
bf0030ed33ab6d2f6608454953120665f6ac4592	#N/A	Metazoa	0.83	unclassified_Metazoa	0.54	unclassified_Metazoa	0.42	unclassified_Metazoa	0.18	unclassified_Metazoa	0.15	unclassified_Metazoa	0.15	unclassified_Metazoa_sp	0.15	0	0	0	0	0	0	0	0	0	0	0	0	0	0	0	0	0	0	0	0	0	0	0	0	0	0	0	0	0	0	0	0	0	0
d5a011ec0d7183e4cc85d0c0ffd9e9841da63496	#N/A	Metazoa	0.8	unclassified_Metazoa	0.23	unclassified_Metazoa	0.15	unclassified_Metazoa	0.15	unclassified_Metazoa	0.15	unclassified_Metazoa	0.15	unclassified_Metazoa_sp	0.15	0	0	0	0	0	0	0	0	0	0	0	106	14	0	0	0	0	266	38	0	0	103	36	0	0	0	0	0	0	0	0	0	0	0
800a9853e9c33d860b7516851a81bfef16f33ca2	#N/A	Metazoa	0.98	unclassified_Metazoa	0.73	unclassified_Metazoa	0.36	unclassified_Metazoa	0.22	unclassified_Metazoa	0.15	unclassified_Metazoa	0.15	unclassified_Metazoa_sp	0.14	0	0	0	0	0	0	0	0	0	0	0	0	0	0	0	0	0	0	0	0	0	0	0	0	0	0	0	0	0	0	0	0	0	0
87d49672a6a676393959a515e791b4534c701025	#N/A	Metazoa	1	unclassified_Metazoa	0.63	unclassified_Metazoa	0.57	unclassified_Metazoa	0.32	unclassified_Metazoa	0.32	unclassified_Metazoa	0.15	unclassified_Metazoa_sp	0.14	0	2	0	0	14	0	0	0	0	0	0	0	0	0	0	0	2	0	0	0	0	0	0	0	0	0	0	0	0	0	10	0	0	133
a718d4a3405499fe632dd0c8c3c6adfe9cc1e22e	#N/A	Metazoa	0.81	unclassified_Metazoa	0.64	unclassified_Metazoa	0.33	unclassified_Metazoa	0.23	unclassified_Metazoa	0.16	unclassified_Metazoa	0.15	unclassified_Metazoa_sp	0.04	0	0	0	0	0	0	0	0	0	0	0	0	0	0	0	0	0	0	0	0	0	0	0	0	0	0	0	0	0	0	0	0	0	0
02b5d7014da36e96e8f8d5b8ad9f5d14da8aa792	#N/A	Metazoa	0.86	unclassified_Metazoa	0.18	unclassified_Metazoa	0.18	unclassified_Metazoa	0.14	unclassified_Metazoa	0.14	unclassified_Metazoa	0.14	unclassified_Metazoa_sp	0.14	0	0	0	0	0	0	0	0	0	0	0	0	0	0	0	0	0	0	0	0	0	0	0	0	0	0	0	0	0	0	0	0	0	0
3556648f68e3085948bed51a7f94909968637221	#N/A	Metazoa	0.97	unclassified_Metazoa	0.54	unclassified_Metazoa	0.17	unclassified_Metazoa	0.14	unclassified_Metazoa	0.14	unclassified_Metazoa	0.14	unclassified_Metazoa_sp	0.14	0	0	0	0	0	0	0	0	0	0	0	0	81	1490	0	207	38	0	0	1872	0	0	0	0	0	0	0	0	0	0	0	0	0	0
4e2f686f53d5a41b440928693f0d063d9b8f4fc5	#N/A	Metazoa	0.8	unclassified_Metazoa	0.14	unclassified_Metazoa	0.14	unclassified_Metazoa	0.14	unclassified_Metazoa	0.14	unclassified_Metazoa	0.14	unclassified_Metazoa_sp	0.14	0	0	0	0	0	0	0	0	0	0	0	0	0	0	0	0	0	0	0	0	0	0	0	0	0	0	0	0	8	0	0	0	0	0
c1413b691c24f72d9bbb28be7df4545215b0ffe3	#N/A	Metazoa	0.89	unclassified_Metazoa	0.53	unclassified_Metazoa	0.37	unclassified_Metazoa	0.15	unclassified_Metazoa	0.14	unclassified_Metazoa	0.14	unclassified_Metazoa_sp	0.14	0	0	0	0	0	0	2	0	0	0	0	0	0	0	0	4	0	2	0	0	0	0	2	0	2	0	3	0	0	3	8	7	5	2
d59a7df461d671b3e463f4aaa78e2d5c9b0cc78c	#N/A	Metazoa	0.9	unclassified_Metazoa	0.75	unclassified_Metazoa	0.59	unclassified_Metazoa	0.22	unclassified_Metazoa	0.19	unclassified_Metazoa	0.14	unclassified_Metazoa_sp	0.14	0	0	0	0	0	0	0	0	0	0	0	0	0	0	0	0	0	0	0	0	0	0	0	0	0	0	0	0	0	0	0	0	0	0
e9010a83951b4738b3d8b9b4d3e42736eaa7c6bd	#N/A	Metazoa	0.88	unclassified_Metazoa	0.16	unclassified_Metazoa	0.16	unclassified_Metazoa	0.15	unclassified_Metazoa	0.14	unclassified_Metazoa	0.14	unclassified_Metazoa_sp	0.14	0	0	0	0	0	0	0	0	0	0	0	0	0	0	0	0	0	54	0	0	0	0	0	0	0	0	0	0	0	0	0	0	0	0
66607773ae336c9c97022337aa2034d79057d93e	#N/A	Metazoa	1	unclassified_Metazoa	0.42	unclassified_Metazoa	0.41	unclassified_Metazoa	0.27	unclassified_Metazoa	0.27	unclassified_Metazoa	0.14	unclassified_Metazoa_sp	0.11	0	0	0	0	0	0	0	0	0	0	0	0	0	0	0	0	0	0	0	0	0	0	0	0	0	0	0	0	0	3	0	0	0	0
14249a5514aa8943625135c8098870ae83471dcc	#N/A	Metazoa	0.81	unclassified_Metazoa	0.37	unclassified_Metazoa	0.32	unclassified_Metazoa	0.23	unclassified_Metazoa	0.13	unclassified_Metazoa	0.13	unclassified_Metazoa_sp	0.13	0	0	0	0	0	0	0	0	0	0	0	0	0	0	0	0	0	0	0	0	0	0	0	0	0	0	0	0	0	0	3	0	0	0
205696a76abac9f3b18d49405bb716f03ef4c994	#N/A	Metazoa	0.82	unclassified_Metazoa	0.2	unclassified_Metazoa	0.19	unclassified_Metazoa	0.17	unclassified_Metazoa	0.13	unclassified_Metazoa	0.13	unclassified_Metazoa_sp	0.13	0	0	0	0	0	0	0	0	0	0	0	0	0	0	0	0	0	0	0	0	0	0	0	0	0	0	4	0	0	0	0	0	0	0
253cd5c0dc0d88f4b193e1fa94ce244278eb87c7	#N/A	Metazoa	0.86	unclassified_Metazoa	0.46	unclassified_Metazoa	0.46	unclassified_Metazoa	0.19	unclassified_Metazoa	0.13	unclassified_Metazoa	0.13	unclassified_Metazoa_sp	0.13	0	0	0	0	0	0	0	0	0	0	0	0	0	0	0	2	0	0	0	0	0	0	0	0	0	0	0	0	0	0	0	0	0	0
75d8b517a66c96a21a30c43e08263777c4730ab5	#N/A	Metazoa	1	unclassified_Metazoa	0.65	unclassified_Metazoa	0.64	unclassified_Metazoa	0.5	unclassified_Metazoa	0.5	unclassified_Metazoa	0.13	unclassified_Metazoa_sp	0.13	0	0	0	0	0	0	0	0	0	0	0	0	85	0	10	0	14	13	0	0	13	0	0	25	421	29	9	1106	12	395	0	5	0	0
d4e5c753d078bddb2cf7e57f80a446edf7cb4f51	#N/A	Metazoa	0.94	unclassified_Metazoa	0.14	unclassified_Metazoa	0.13	unclassified_Metazoa	0.13	unclassified_Metazoa	0.13	unclassified_Metazoa	0.13	unclassified_Metazoa_sp	0.13	0	0	0	0	0	0	0	0	0	0	0	0	0	0	0	0	0	0	0	0	0	0	0	0	0	0	0	0	0	0	0	0	0	0
beab4b77c1629ad7288c491e11ec145e8804c4fb	#N/A	Metazoa	0.97	unclassified_Metazoa	0.74	unclassified_Metazoa	0.52	unclassified_Metazoa	0.17	unclassified_Metazoa	0.16	unclassified_Metazoa	0.13	unclassified_Metazoa_sp	0.12	0	0	0	0	0	0	0	3	0	0	0	0	5	0	12	0	0	32	6	0	98	119	30	0	0	0	0	3	0	0	0	0	0	6
6a816fbd0e67844d62756c11742fa33d3d79586b	#N/A	Metazoa	1	unclassified_Metazoa	0.71	unclassified_Metazoa	0.4	unclassified_Metazoa	0.33	unclassified_Metazoa	0.13	unclassified_Metazoa	0.13	unclassified_Metazoa_sp	0.07	0	0	0	0	0	0	0	0	0	0	0	0	0	0	0	17	0	0	0	0	0	0	0	0	0	0	0	0	0	0	0	0	0	0
9b390828b28128bbd0a41be2abd35868454ce11e	#N/A	Metazoa	0.93	unclassified_Metazoa	0.79	unclassified_Metazoa	0.57	unclassified_Metazoa	0.22	unclassified_Metazoa	0.14	unclassified_Metazoa	0.13	unclassified_Metazoa_sp	0.02	0	0	0	0	0	0	0	0	0	0	0	0	0	0	0	0	0	0	0	0	0	0	0	0	0	0	0	0	0	0	0	0	0	0
0a004f656156ea9be45b563ea8c19d12512380d1	#N/A	Metazoa	0.86	unclassified_Metazoa	0.74	unclassified_Metazoa	0.45	unclassified_Metazoa	0.35	unclassified_Metazoa	0.12	unclassified_Metazoa	0.12	unclassified_Metazoa_sp	0.12	0	0	0	0	0	0	0	0	0	0	0	0	0	0	0	0	0	0	0	0	0	0	11	0	0	0	0	0	0	0	0	0	0	0
0c27f456ddfbb522e245c749077dd33ec38e8c56	#N/A	Metazoa	0.8	unclassified_Metazoa	0.12	unclassified_Metazoa	0.12	unclassified_Metazoa	0.12	unclassified_Metazoa	0.12	unclassified_Metazoa	0.12	unclassified_Metazoa_sp	0.12	0	0	0	0	0	0	0	0	0	0	0	0	0	0	0	0	0	0	0	440	0	0	0	0	0	0	0	0	0	0	0	0	0	0
19cb46b6f6a1725c6182fd2b18ac5d3519ac5c4f	#N/A	Metazoa	0.81	unclassified_Metazoa	0.12	unclassified_Metazoa	0.12	unclassified_Metazoa	0.12	unclassified_Metazoa	0.12	unclassified_Metazoa	0.12	unclassified_Metazoa_sp	0.12	0	0	0	0	0	0	0	0	0	0	0	0	0	0	0	0	0	0	0	0	0	0	0	0	0	0	0	0	0	54	137	0	0	0
6adbd817b3ddd5f62a035f82b6659eb1a73d5b4e	#N/A	Metazoa	1	unclassified_Metazoa	0.75	unclassified_Metazoa	0.32	unclassified_Metazoa	0.27	unclassified_Metazoa	0.21	unclassified_Metazoa	0.12	unclassified_Metazoa_sp	0.12	0	0	0	3	0	0	0	0	0	0	0	0	0	0	0	0	0	0	0	0	0	0	0	0	594	0	0	7	0	0	0	0	0	0
74a5d2ceb66636af4465415b5e82779ba7156dff	#N/A	Metazoa	0.82	unclassified_Metazoa	0.18	unclassified_Metazoa	0.15	unclassified_Metazoa	0.12	unclassified_Metazoa	0.12	unclassified_Metazoa	0.12	unclassified_Metazoa_sp	0.12	0	0	0	0	0	0	0	0	0	0	0	0	0	0	0	0	0	0	0	0	0	0	0	0	0	0	0	0	0	3	0	0	0	0
a87233ff6d4ab309725f6e034ccb67547aa89a58	#N/A	Metazoa	0.91	unclassified_Metazoa	0.65	unclassified_Metazoa	0.29	unclassified_Metazoa	0.15	unclassified_Metazoa	0.12	unclassified_Metazoa	0.12	unclassified_Metazoa_sp	0.12	0	0	0	0	0	3	0	0	0	0	0	0	0	0	0	0	0	0	0	0	0	0	0	0	0	0	0	0	0	0	0	0	0	0
abb8d64ccbaadadb1381040424cec0689051c596	#N/A	Metazoa	1	unclassified_Metazoa	0.77	unclassified_Metazoa	0.2	unclassified_Metazoa	0.16	unclassified_Metazoa	0.12	unclassified_Metazoa	0.12	unclassified_Metazoa_sp	0.12	0	0	0	0	0	0	0	0	0	0	0	0	0	0	0	0	94	80	0	0	0	0	0	0	0	0	0	0	0	823	0	83	0	0
c93622bfd0bf434f65506e84ece5e8feb2df0500	#N/A	Metazoa	0.83	unclassified_Metazoa	0.31	unclassified_Metazoa	0.28	unclassified_Metazoa	0.13	unclassified_Metazoa	0.12	unclassified_Metazoa	0.12	unclassified_Metazoa_sp	0.12	0	0	0	0	0	0	0	0	0	2	0	0	0	0	0	0	0	0	0	0	0	0	0	0	0	0	0	0	0	0	0	0	0	0
d1a71427e65c8bd99855f8f3328fa4c1979cb715	#N/A	Metazoa	0.93	unclassified_Metazoa	0.76	unclassified_Metazoa	0.24	unclassified_Metazoa	0.12	unclassified_Metazoa	0.12	unclassified_Metazoa	0.12	unclassified_Metazoa_sp	0.12	0	0	0	0	0	0	0	0	0	0	0	0	0	0	2	4	0	2	0	2	0	0	0	0	0	0	0	0	0	0	2	0	0	0
ffe359f02440d7f22f196a25af833ea560c5e488	#N/A	Metazoa	0.8	unclassified_Metazoa	0.12	unclassified_Metazoa	0.12	unclassified_Metazoa	0.12	unclassified_Metazoa	0.12	unclassified_Metazoa	0.12	unclassified_Metazoa_sp	0.12	0	0	0	0	0	0	0	0	0	0	0	0	0	0	0	0	0	0	2	0	0	0	0	0	0	0	0	0	0	0	2	0	0	0
de9f682b9a8a45c18621b3ef223f28fb6b045ad6	#N/A	Metazoa	0.99	unclassified_Metazoa	0.72	unclassified_Metazoa	0.33	unclassified_Metazoa	0.17	unclassified_Metazoa	0.17	unclassified_Metazoa	0.12	unclassified_Metazoa_sp	0.08	0	0	0	0	0	0	0	0	0	0	0	0	0	0	0	0	0	0	0	0	0	0	0	0	0	0	0	0	0	0	0	0	0	3
bc988495fdfecd0bc58cbeeb2b9118d3057596a4	#N/A	Metazoa	0.95	unclassified_Metazoa	0.78	unclassified_Metazoa	0.52	unclassified_Metazoa	0.36	unclassified_Metazoa	0.12	unclassified_Metazoa	0.12	unclassified_Metazoa_sp	0.06	0	0	0	0	0	0	0	11	0	0	0	12	0	0	0	0	0	0	0	0	0	0	0	0	0	0	0	0	0	0	0	0	0	0
0c29a561bdb6a394242c50cd0cbb3a9fb1927d8e	#N/A	Metazoa	1	unclassified_Metazoa	0.19	unclassified_Metazoa	0.12	unclassified_Metazoa	0.12	unclassified_Metazoa	0.11	unclassified_Metazoa	0.11	unclassified_Metazoa_sp	0.11	0	0	0	5	0	6	0	0	0	0	2	0	3	2	0	10	7	0	2	6	7	0	3	0	3	0	0	4	0	44	0	0	4	0
1a078c45b6421c53721f14b426c1e49469e924f2	#N/A	Metazoa	0.81	unclassified_Metazoa	0.28	unclassified_Metazoa	0.28	unclassified_Metazoa	0.17	unclassified_Metazoa	0.15	unclassified_Metazoa	0.11	unclassified_Metazoa_sp	0.11	0	0	0	0	0	0	0	0	0	0	0	0	0	0	0	0	0	0	0	0	0	2	0	0	0	0	0	0	0	0	0	0	0	0
1a4799d1a87e66115691984db79507604e8bf456	#N/A	Metazoa	0.82	unclassified_Metazoa	0.33	unclassified_Metazoa	0.3	unclassified_Metazoa	0.13	unclassified_Metazoa	0.11	unclassified_Metazoa	0.11	unclassified_Metazoa_sp	0.11	0	0	0	0	0	0	0	0	0	0	0	0	0	0	0	0	0	0	0	0	3	0	0	0	0	0	0	0	0	0	0	0	0	0
2bea2b59de3415079c5d16e2dd04b53f8a9d0dac	#N/A	Metazoa	1	unclassified_Metazoa	0.75	unclassified_Metazoa	0.57	unclassified_Metazoa	0.23	unclassified_Metazoa	0.12	unclassified_Metazoa	0.11	unclassified_Metazoa_sp	0.11	0	0	0	0	0	0	0	0	0	0	0	0	0	0	0	0	0	0	0	0	0	0	0	0	0	0	0	0	0	0	0	0	0	0
30ba6f41937c780aa7850e80deffa0c06b1f9f74	#N/A	Metazoa	0.81	unclassified_Metazoa	0.11	unclassified_Metazoa	0.11	unclassified_Metazoa	0.11	unclassified_Metazoa	0.11	unclassified_Metazoa	0.11	unclassified_Metazoa_sp	0.11	0	0	0	0	0	0	0	0	0	0	0	0	0	0	0	0	0	0	0	0	0	0	0	0	0	0	0	0	0	0	0	0	0	0
578fdbbcace563c1f0598a4ac23bd07f5991da82	#N/A	Metazoa	0.92	unclassified_Metazoa	0.43	unclassified_Metazoa	0.29	unclassified_Metazoa	0.11	unclassified_Metazoa	0.11	unclassified_Metazoa	0.11	unclassified_Metazoa_sp	0.11	0	0	0	0	0	0	0	0	0	0	0	0	0	0	0	0	0	0	0	0	0	0	0	0	0	0	0	0	21	0	0	0	0	0
673730c4d5a2760f6fd362b45a5cb96aa3996a5a	#N/A	Metazoa	0.81	unclassified_Metazoa	0.11	unclassified_Metazoa	0.11	unclassified_Metazoa	0.11	unclassified_Metazoa	0.11	unclassified_Metazoa	0.11	unclassified_Metazoa_sp	0.11	0	0	0	0	0	0	0	0	0	0	0	0	0	0	0	0	0	0	0	0	0	0	0	0	0	0	0	0	0	0	0	0	0	0
68ba932e7e11044b8560dadd0541e71c573e3c5f	#N/A	Metazoa	0.8	unclassified_Metazoa	0.13	unclassified_Metazoa	0.11	unclassified_Metazoa	0.11	unclassified_Metazoa	0.11	unclassified_Metazoa	0.11	unclassified_Metazoa_sp	0.11	0	0	0	0	0	0	0	0	0	0	0	0	0	0	0	0	0	0	0	0	0	0	0	0	0	0	0	0	0	0	0	3	0	0
7882b343f6942adf95715fb080e39ec974b988ad	#N/A	Metazoa	0.98	unclassified_Metazoa	0.74	unclassified_Metazoa	0.42	unclassified_Metazoa	0.21	unclassified_Metazoa	0.12	unclassified_Metazoa	0.11	unclassified_Metazoa_sp	0.11	0	0	0	0	0	0	0	0	0	0	0	3	0	0	0	0	0	0	0	0	0	0	0	0	0	0	0	0	0	0	0	0	0	0
a8db4f6895ccc68e7d4d48350601d156d42f40b6	#N/A	Metazoa	0.81	unclassified_Metazoa	0.67	unclassified_Metazoa	0.34	unclassified_Metazoa	0.23	unclassified_Metazoa	0.11	unclassified_Metazoa	0.11	unclassified_Metazoa_sp	0.11	0	0	0	0	0	0	0	0	0	0	0	0	0	0	0	0	0	0	0	0	0	0	0	0	0	0	0	0	0	0	0	0	0	3
b238df283743c1ae65411230380419c28cc8ca82	#N/A	Metazoa	1	unclassified_Metazoa	0.51	unclassified_Metazoa	0.14	unclassified_Metazoa	0.13	unclassified_Metazoa	0.13	unclassified_Metazoa	0.11	unclassified_Metazoa_sp	0.11	0	0	0	0	0	0	0	0	0	0	0	0	0	0	0	0	0	0	0	0	0	0	0	0	0	0	0	0	0	0	0	0	0	0
d6e28152892e5e2cb07260a76f36954470fce611	#N/A	Metazoa	0.85	unclassified_Metazoa	0.11	unclassified_Metazoa	0.11	unclassified_Metazoa	0.11	unclassified_Metazoa	0.11	unclassified_Metazoa	0.11	unclassified_Metazoa_sp	0.11	0	0	0	0	0	0	0	55	0	0	0	0	0	0	0	0	0	0	0	0	0	0	0	0	0	0	0	0	0	0	0	0	0	0
f18b518c4d79c4494c3f9e03c7dc6085faea5ce3	#N/A	Metazoa	0.81	unclassified_Metazoa	0.11	unclassified_Metazoa	0.11	unclassified_Metazoa	0.11	unclassified_Metazoa	0.11	unclassified_Metazoa	0.11	unclassified_Metazoa_sp	0.11	0	0	0	0	0	0	0	0	0	0	0	0	0	0	0	0	0	0	0	0	0	0	0	0	0	0	0	0	0	0	0	0	0	0
ada1fa1feb530508b754ca91d84f1aa7ccc6ef6d	#N/A	Metazoa	0.93	unclassified_Metazoa	0.65	unclassified_Metazoa	0.65	unclassified_Metazoa	0.5	unclassified_Metazoa	0.5	unclassified_Metazoa	0.11	unclassified_Metazoa_sp	0.1	0	0	0	0	0	0	0	0	0	0	0	0	0	0	0	0	0	0	0	0	0	0	0	0	0	0	0	11	0	0	0	0	0	0
02597d7a2ef79a83530201805a937cc7e2df9222	#N/A	Metazoa	0.88	unclassified_Metazoa	0.78	unclassified_Metazoa	0.35	unclassified_Metazoa	0.16	unclassified_Metazoa	0.1	unclassified_Metazoa	0.1	unclassified_Metazoa_sp	0.1	0	0	0	0	0	0	0	0	0	0	0	0	0	0	0	0	0	0	0	0	0	0	0	0	0	0	0	0	0	0	0	0	0	0
025d48f02f854ac94a3f6a65a0909120d773e151	#N/A	Metazoa	0.87	unclassified_Metazoa	0.56	unclassified_Metazoa	0.12	unclassified_Metazoa	0.11	unclassified_Metazoa	0.1	unclassified_Metazoa	0.1	unclassified_Metazoa_sp	0.1	0	0	0	0	0	0	0	0	0	0	0	0	0	0	0	0	0	0	0	0	0	0	0	0	0	0	0	0	0	0	7	0	0	0
0f29a00d0c1fcf0899fa740678d53a9ddaa30795	#N/A	Metazoa	0.85	unclassified_Metazoa	0.29	unclassified_Metazoa	0.21	unclassified_Metazoa	0.13	unclassified_Metazoa	0.1	unclassified_Metazoa	0.1	unclassified_Metazoa_sp	0.1	0	0	0	0	0	0	0	0	0	0	0	0	0	0	0	0	0	0	0	0	4	0	0	0	0	0	0	0	0	0	0	0	0	0
1097280ecfaf7aa7062782e349bbf17223abbae4	#N/A	Metazoa	0.89	unclassified_Metazoa	0.56	unclassified_Metazoa	0.41	unclassified_Metazoa	0.2	unclassified_Metazoa	0.1	unclassified_Metazoa	0.1	unclassified_Metazoa_sp	0.1	0	0	0	0	0	0	0	0	0	0	0	0	0	0	0	0	0	0	0	0	0	0	0	0	0	0	0	0	0	0	0	7	0	0
1e3889d15d5910c2e2f65bf36c40d303e21dbd6c	#N/A	Metazoa	0.89	unclassified_Metazoa	0.7	unclassified_Metazoa	0.29	unclassified_Metazoa	0.24	unclassified_Metazoa	0.14	unclassified_Metazoa	0.1	unclassified_Metazoa_sp	0.1	0	0	0	0	0	0	0	0	0	0	0	0	0	0	0	0	0	0	0	0	0	0	0	0	0	0	0	0	0	0	0	0	2	0
29e2406e728660be5587ea28c63fc9905daf9e60	#N/A	Metazoa	0.82	unclassified_Metazoa	0.16	unclassified_Metazoa	0.16	unclassified_Metazoa	0.1	unclassified_Metazoa	0.1	unclassified_Metazoa	0.1	unclassified_Metazoa_sp	0.1	0	0	0	0	0	0	0	0	0	0	0	0	0	0	0	0	0	0	0	0	0	0	0	0	0	0	0	0	0	0	0	0	0	0
2c070b5e1f9f06f6dc1f4a7e1e1fbed85c914652	#N/A	Metazoa	0.98	unclassified_Metazoa	0.61	unclassified_Metazoa	0.22	unclassified_Metazoa	0.18	unclassified_Metazoa	0.18	unclassified_Metazoa	0.1	unclassified_Metazoa_sp	0.1	0	0	0	0	0	3	0	0	0	0	0	0	0	0	0	0	0	0	0	0	0	0	0	0	0	0	0	0	0	0	0	0	0	0
3c89fee6bcb57682e932d4a952d6cff3bbca2a96	#N/A	Metazoa	0.86	unclassified_Metazoa	0.46	unclassified_Metazoa	0.14	unclassified_Metazoa	0.13	unclassified_Metazoa	0.11	unclassified_Metazoa	0.1	unclassified_Metazoa_sp	0.1	0	0	0	0	0	0	0	0	0	0	0	0	0	0	0	0	0	0	0	0	0	0	0	0	0	0	0	0	0	0	0	4	0	0
4379082595a330011955c3982ff1505b3a951917	#N/A	Metazoa	0.91	unclassified_Metazoa	0.74	unclassified_Metazoa	0.29	unclassified_Metazoa	0.24	unclassified_Metazoa	0.15	unclassified_Metazoa	0.1	unclassified_Metazoa_sp	0.1	0	0	0	0	0	0	0	0	0	0	0	0	0	0	0	0	0	0	0	0	0	0	0	0	0	0	0	0	0	0	0	0	2	0
5b6d7a175acf6e4b4dab40eb65433e6ae8bfbc19	#N/A	Metazoa	1	unclassified_Metazoa	0.59	unclassified_Metazoa	0.59	unclassified_Metazoa	0.15	unclassified_Metazoa	0.15	unclassified_Metazoa	0.1	unclassified_Metazoa_sp	0.1	0	0	0	0	0	0	0	0	2	0	0	0	0	0	0	0	0	0	0	0	0	0	0	0	0	0	0	0	0	0	0	0	0	0
79e0c7cabf59cee0c74835b34cdf4c177437c0b0	#N/A	Metazoa	0.81	unclassified_Metazoa	0.1	unclassified_Metazoa	0.1	unclassified_Metazoa	0.1	unclassified_Metazoa	0.1	unclassified_Metazoa	0.1	unclassified_Metazoa_sp	0.1	0	0	0	0	0	0	0	0	0	0	0	0	0	0	0	0	0	2	0	0	0	0	0	0	0	0	0	0	0	0	0	0	0	0
7bb06b949d7448c3c9896deb3d36014bcf3668db	#N/A	Metazoa	0.8	unclassified_Metazoa	0.16	unclassified_Metazoa	0.16	unclassified_Metazoa	0.15	unclassified_Metazoa	0.11	unclassified_Metazoa	0.1	unclassified_Metazoa_sp	0.1	0	0	0	0	2	0	0	0	0	0	0	0	0	0	0	0	0	0	0	0	0	0	0	0	0	0	0	0	0	0	0	0	0	0
8dacd4ab780f4dc9b2e4d5e56134db80b227c527	#N/A	Metazoa	0.94	unclassified_Metazoa	0.56	unclassified_Metazoa	0.32	unclassified_Metazoa	0.11	unclassified_Metazoa	0.1	unclassified_Metazoa	0.1	unclassified_Metazoa_sp	0.1	0	0	0	0	0	0	0	0	0	0	0	0	0	0	0	0	0	0	10	0	0	0	0	0	0	0	0	0	0	0	0	0	0	0
e7f77b4c79c516daa37a879bc3846d29aa2bb4af	#N/A	Metazoa	0.88	unclassified_Metazoa	0.66	unclassified_Metazoa	0.26	unclassified_Metazoa	0.1	unclassified_Metazoa	0.1	unclassified_Metazoa	0.1	unclassified_Metazoa_sp	0.1	0	3	0	0	0	0	0	0	4	0	0	0	0	0	0	0	0	0	0	0	0	0	0	0	0	0	0	0	0	0	7	0	0	0
eef7f755876f35bf34aaf6aa89207b63da7e40c1	#N/A	Metazoa	0.89	unclassified_Metazoa	0.18	unclassified_Metazoa	0.16	unclassified_Metazoa	0.13	unclassified_Metazoa	0.1	unclassified_Metazoa	0.1	unclassified_Metazoa_sp	0.1	0	0	0	0	0	0	0	0	0	0	0	0	0	0	0	0	0	0	0	0	0	0	0	0	0	0	0	0	0	16	0	43	38	0
f657585962c4860ae59cba66956b70c8a85ce579	#N/A	Metazoa	0.81	unclassified_Metazoa	0.7	unclassified_Metazoa	0.61	unclassified_Metazoa	0.27	unclassified_Metazoa	0.14	unclassified_Metazoa	0.1	unclassified_Metazoa_sp	0.1	0	0	0	0	0	0	0	0	0	0	0	0	0	0	0	0	0	0	0	0	0	0	0	0	0	0	0	0	0	0	0	0	0	0
230ec18b053897dfe5e1f0284db90dee189c5711	#N/A	Metazoa	0.88	unclassified_Metazoa	0.74	unclassified_Metazoa	0.31	unclassified_Metazoa	0.17	unclassified_Metazoa	0.1	unclassified_Metazoa	0.1	unclassified_Metazoa_sp	0.09	0	0	0	0	0	0	0	0	0	0	0	0	0	0	0	0	0	0	0	0	0	0	0	0	0	0	0	0	0	0	0	0	16	0
aa155999931c75654b93acd59e53fd0e3e2e4117	#N/A	Metazoa	0.88	unclassified_Metazoa	0.53	unclassified_Metazoa	0.29	unclassified_Metazoa	0.17	unclassified_Metazoa	0.1	unclassified_Metazoa	0.1	unclassified_Metazoa_sp	0.09	0	0	0	0	0	0	0	0	0	0	0	0	0	0	4	0	0	0	0	0	0	0	0	0	0	0	0	0	0	0	0	0	0	0
b8105a44ae3614b42520d2b50f885115644318cc	#N/A	Metazoa	0.94	unclassified_Metazoa	0.67	unclassified_Metazoa	0.5	unclassified_Metazoa	0.28	unclassified_Metazoa	0.17	unclassified_Metazoa	0.1	unclassified_Metazoa_sp	0.09	0	0	0	0	0	0	0	0	0	0	0	0	3	0	0	0	0	0	0	0	0	0	0	0	0	0	0	0	0	0	0	0	0	0
dd0cea837326027c87b83eec933a4560d8ffc281	#N/A	Metazoa	0.89	unclassified_Metazoa	0.28	unclassified_Metazoa	0.25	unclassified_Metazoa	0.22	unclassified_Metazoa	0.13	unclassified_Metazoa	0.1	unclassified_Metazoa_sp	0.07	0	0	28	0	0	0	0	0	0	0	0	0	0	0	0	0	0	0	0	0	0	0	0	0	0	0	0	0	0	31	0	251	9	0
2037a5010871c5cf52613678b418279e97e15af2	#N/A	Metazoa	0.98	unclassified_Metazoa	0.45	unclassified_Metazoa	0.41	unclassified_Metazoa	0.32	unclassified_Metazoa	0.24	unclassified_Metazoa	0.09	unclassified_Metazoa_sp	0.09	0	0	0	0	0	0	0	0	0	0	0	0	0	0	0	0	0	0	0	0	0	0	0	0	0	0	0	0	3	0	0	0	0	0
2f871428e212986525312370a5e38afd95d0bc77	#N/A	Metazoa	0.83	unclassified_Metazoa	0.2	unclassified_Metazoa	0.2	unclassified_Metazoa	0.09	unclassified_Metazoa	0.09	unclassified_Metazoa	0.09	unclassified_Metazoa_sp	0.09	6	0	0	0	0	0	0	0	0	0	0	0	0	0	0	0	0	0	0	0	0	0	0	0	0	0	0	0	0	0	0	0	8	0
62e00ce70495a1fc8d06293a8582639dccfd900e	#N/A	Metazoa	1	unclassified_Metazoa	0.41	unclassified_Metazoa	0.36	unclassified_Metazoa	0.11	unclassified_Metazoa	0.09	unclassified_Metazoa	0.09	unclassified_Metazoa_sp	0.09	0	0	0	0	0	0	0	4	0	0	0	0	0	7	0	0	0	0	0	0	0	0	0	0	0	0	0	0	0	0	0	0	0	0
6f7bf2d6339bd88d4a83ddf0813567355c8b838b	#N/A	Metazoa	0.83	unclassified_Metazoa	0.24	unclassified_Metazoa	0.23	unclassified_Metazoa	0.09	unclassified_Metazoa	0.09	unclassified_Metazoa	0.09	unclassified_Metazoa_sp	0.09	0	0	0	2	0	0	0	0	0	0	0	0	0	0	0	0	0	0	0	0	0	0	0	0	0	0	0	0	0	0	0	0	0	0
716ad93d178337e6b6928d8259118e101c683311	#N/A	Metazoa	0.82	unclassified_Metazoa	0.22	unclassified_Metazoa	0.2	unclassified_Metazoa	0.1	unclassified_Metazoa	0.1	unclassified_Metazoa	0.09	unclassified_Metazoa_sp	0.09	0	0	0	0	0	0	0	0	0	0	0	0	0	0	0	0	0	0	0	0	0	0	0	0	0	0	0	0	0	0	0	0	0	0
71e298fc1011b22a7cea4653f1a3a7f6c70048af	#N/A	Metazoa	0.95	unclassified_Metazoa	0.37	unclassified_Metazoa	0.37	unclassified_Metazoa	0.09	unclassified_Metazoa	0.09	unclassified_Metazoa	0.09	unclassified_Metazoa_sp	0.09	0	0	0	0	0	0	0	0	0	0	0	2	0	0	0	0	0	0	0	0	0	0	0	0	0	0	0	0	0	0	0	0	0	0
764e7d2e25affea89eabd64e606eea4f9997101e	#N/A	Metazoa	0.96	unclassified_Metazoa	0.6	unclassified_Metazoa	0.14	unclassified_Metazoa	0.09	unclassified_Metazoa	0.09	unclassified_Metazoa	0.09	unclassified_Metazoa_sp	0.09	0	0	0	3	0	0	0	0	0	0	0	0	108	0	0	6	78	4	7	7	0	0	4	0	0	0	0	0	0	0	0	4	0	0
89f28cba3522cb9d4152ef0558b96ae609eeca3a	#N/A	Metazoa	0.84	unclassified_Metazoa	0.33	unclassified_Metazoa	0.16	unclassified_Metazoa	0.16	unclassified_Metazoa	0.13	unclassified_Metazoa	0.09	unclassified_Metazoa_sp	0.09	0	0	0	0	0	0	0	0	0	0	0	0	0	0	0	0	0	0	0	0	0	0	0	0	0	0	0	0	0	5	0	0	0	0
99a51d75a90b6d13d637e03abbabd6a82149e118	#N/A	Metazoa	0.8	unclassified_Metazoa	0.56	unclassified_Metazoa	0.33	unclassified_Metazoa	0.17	unclassified_Metazoa	0.09	unclassified_Metazoa	0.09	unclassified_Metazoa_sp	0.09	0	0	0	0	0	0	0	0	0	0	0	0	0	0	0	0	0	0	0	0	0	0	0	0	0	0	0	0	0	0	0	0	0	0
9a3ecd84ee6d2e0f3e4cbe3f78c2e79775ece229	#N/A	Metazoa	0.81	unclassified_Metazoa	0.45	unclassified_Metazoa	0.36	unclassified_Metazoa	0.19	unclassified_Metazoa	0.09	unclassified_Metazoa	0.09	unclassified_Metazoa_sp	0.09	0	0	0	0	0	0	0	0	0	0	0	0	0	0	0	0	0	0	0	0	0	0	0	0	0	0	0	0	0	0	0	0	0	0
c8ca92a0aa76b3c29cf9072696b6d2382eec7226	#N/A	Metazoa	1	unclassified_Metazoa	0.76	unclassified_Metazoa	0.72	unclassified_Metazoa	0.09	unclassified_Metazoa	0.09	unclassified_Metazoa	0.09	unclassified_Metazoa_sp	0.09	0	0	0	0	0	0	0	0	3	0	0	0	0	0	0	0	0	0	0	0	0	0	0	0	0	0	0	0	0	0	0	0	0	0
c8ce821ff5eba0a02983c0c38ef3c3bbf48a8c4d	#N/A	Metazoa	0.99	unclassified_Metazoa	0.76	unclassified_Metazoa	0.35	unclassified_Metazoa	0.23	unclassified_Metazoa	0.09	unclassified_Metazoa	0.09	unclassified_Metazoa_sp	0.09	0	0	0	0	82	0	0	47	4	254	0	97	0	0	0	126	111	0	22	0	0	0	0	0	0	0	0	0	0	10	0	42	204	290
cf7e9836972280678101915af47ebb4a0aa57b24	#N/A	Metazoa	0.9	unclassified_Metazoa	0.64	unclassified_Metazoa	0.43	unclassified_Metazoa	0.27	unclassified_Metazoa	0.15	unclassified_Metazoa	0.09	unclassified_Metazoa_sp	0.09	0	0	0	0	0	0	0	0	0	0	0	0	0	0	0	0	0	0	0	0	0	0	0	0	11	0	0	0	0	0	0	0	0	0
d08e842a5d844f3a72a0a75da5e0fe647a661112	#N/A	Metazoa	1	unclassified_Metazoa	0.79	unclassified_Metazoa	0.77	unclassified_Metazoa	0.17	unclassified_Metazoa	0.11	unclassified_Metazoa	0.09	unclassified_Metazoa_sp	0.09	0	0	0	0	7	0	0	17	17	0	0	3	0	0	0	0	0	0	0	0	0	0	0	0	0	0	0	0	0	0	0	0	0	23
da6c1234f8845f38684e30f8f1fa0505e4ff1329	#N/A	Metazoa	0.83	unclassified_Metazoa	0.13	unclassified_Metazoa	0.13	unclassified_Metazoa	0.09	unclassified_Metazoa	0.09	unclassified_Metazoa	0.09	unclassified_Metazoa_sp	0.09	0	0	0	0	0	0	0	0	0	0	0	0	0	0	0	0	0	0	0	0	22	0	0	0	0	0	0	0	0	0	0	0	0	0
dca08c89b8fe1f8e2a3355142161681e082be9dd	#N/A	Metazoa	0.86	unclassified_Metazoa	0.13	unclassified_Metazoa	0.13	unclassified_Metazoa	0.11	unclassified_Metazoa	0.09	unclassified_Metazoa	0.09	unclassified_Metazoa_sp	0.09	0	0	0	0	0	0	0	0	0	0	0	0	0	0	0	0	0	0	0	0	0	0	0	0	0	0	0	0	0	0	0	0	0	0
dfbc5ff87749d630f798a3310fb9f9c8ef5535af	#N/A	Metazoa	0.84	unclassified_Metazoa	0.55	unclassified_Metazoa	0.3	unclassified_Metazoa	0.18	unclassified_Metazoa	0.16	unclassified_Metazoa	0.09	unclassified_Metazoa_sp	0.09	0	0	0	0	0	0	0	0	0	0	0	0	0	0	0	0	0	0	0	0	0	0	0	0	0	0	0	0	0	0	0	0	0	0
e11aafd45d253da56971cc198d8a36e175c0ffc3	#N/A	Metazoa	1	unclassified_Metazoa	0.77	unclassified_Metazoa	0.29	unclassified_Metazoa	0.22	unclassified_Metazoa	0.09	unclassified_Metazoa	0.09	unclassified_Metazoa_sp	0.09	0	0	0	0	0	0	0	0	0	0	0	0	0	0	0	0	0	0	0	0	0	0	0	0	0	0	0	0	0	0	0	0	0	0
e12e69e7d4efd9da2066f7f551b74a131111b769	#N/A	Metazoa	0.99	unclassified_Metazoa	0.11	unclassified_Metazoa	0.11	unclassified_Metazoa	0.11	unclassified_Metazoa	0.09	unclassified_Metazoa	0.09	unclassified_Metazoa_sp	0.09	0	0	0	0	0	0	0	33	0	10	0	0	0	0	0	0	5	0	0	0	0	19	0	0	0	0	0	0	0	0	0	0	0	0
ea2d925aa6b83c2810ecb48e73fced0d45c82563	#N/A	Metazoa	0.81	unclassified_Metazoa	0.09	unclassified_Metazoa	0.09	unclassified_Metazoa	0.09	unclassified_Metazoa	0.09	unclassified_Metazoa	0.09	unclassified_Metazoa_sp	0.09	0	15	0	0	3	0	12	0	0	0	0	0	0	0	0	0	0	0	0	0	0	0	0	0	0	0	0	0	0	0	20	2	0	8
ee2b4de8ed9d64cc8ae29ae72cc9eb252af10eb8	#N/A	Metazoa	0.86	unclassified_Metazoa	0.09	unclassified_Metazoa	0.09	unclassified_Metazoa	0.09	unclassified_Metazoa	0.09	unclassified_Metazoa	0.09	unclassified_Metazoa_sp	0.09	0	0	0	0	0	0	0	0	0	0	0	0	0	0	0	0	0	0	0	0	0	0	0	0	0	0	0	0	0	0	0	0	0	0
ee7db097238be1fe6055f076ee16056956460a9f	#N/A	Metazoa	0.95	unclassified_Metazoa	0.58	unclassified_Metazoa	0.39	unclassified_Metazoa	0.2	unclassified_Metazoa	0.09	unclassified_Metazoa	0.09	unclassified_Metazoa_sp	0.09	0	0	0	0	0	0	0	0	0	0	53	0	0	0	0	0	0	0	0	0	0	0	0	0	0	0	0	0	0	0	0	0	0	0
f4aff2a1a1a4f4b5919f89a5dd25574805385651	#N/A	Metazoa	0.87	unclassified_Metazoa	0.69	unclassified_Metazoa	0.62	unclassified_Metazoa	0.11	unclassified_Metazoa	0.09	unclassified_Metazoa	0.09	unclassified_Metazoa_sp	0.09	0	0	0	5	0	0	0	0	0	0	0	0	0	0	0	0	0	0	0	0	0	0	0	0	0	0	0	0	0	0	4	0	0	2
47b00b9f4c57b8475061fa053a369168f7afdd37	#N/A	Metazoa	0.98	unclassified_Metazoa	0.78	unclassified_Metazoa	0.39	unclassified_Metazoa	0.11	unclassified_Metazoa	0.09	unclassified_Metazoa	0.09	unclassified_Metazoa_sp	0.08	0	0	0	0	0	0	0	0	0	0	0	0	0	0	0	0	0	0	0	0	0	0	0	0	0	0	0	2	0	0	0	0	0	0
d69017b20213627476b2ec3d6b7d90e24cdfe790	#N/A	Metazoa	0.83	unclassified_Metazoa	0.65	unclassified_Metazoa	0.48	unclassified_Metazoa	0.19	unclassified_Metazoa	0.1	unclassified_Metazoa	0.09	unclassified_Metazoa_sp	0.08	0	0	0	0	0	0	0	0	0	0	0	0	0	0	0	0	0	0	0	0	0	0	0	0	0	0	0	0	0	0	0	0	0	0
5be008c431aebd22579ac2d926a5c825b25fb44d	#N/A	Metazoa	0.84	unclassified_Metazoa	0.09	unclassified_Metazoa	0.09	unclassified_Metazoa	0.09	unclassified_Metazoa	0.09	unclassified_Metazoa	0.09	unclassified_Metazoa_sp	0.06	0	0	0	0	0	0	0	0	0	0	0	0	0	0	0	0	0	0	0	0	0	0	0	0	0	0	0	0	0	0	0	37	0	6
5f9f480ededca2ce8e97367d398c685da03d2851	#N/A	Metazoa	0.84	unclassified_Metazoa	0.64	unclassified_Metazoa	0.6	unclassified_Metazoa	0.22	unclassified_Metazoa	0.14	unclassified_Metazoa	0.09	unclassified_Metazoa_sp	0.06	0	0	0	0	0	0	0	0	0	0	0	0	0	0	0	0	0	0	0	0	0	0	0	0	0	0	0	0	0	0	0	0	0	0
964318e87482414b08d0473240ef018316b56080	#N/A	Metazoa	1	unclassified_Metazoa	0.65	unclassified_Metazoa	0.61	unclassified_Metazoa	0.26	unclassified_Metazoa	0.26	unclassified_Metazoa	0.09	unclassified_Metazoa_sp	0.05	0	0	0	0	0	0	0	0	0	0	0	0	0	0	0	0	0	0	0	0	0	0	0	0	0	0	0	0	0	2	0	0	0	0
2573c8eb412186245662338648c3e296f033c237	#N/A	Metazoa	0.81	unclassified_Metazoa	0.66	unclassified_Metazoa	0.24	unclassified_Metazoa	0.22	unclassified_Metazoa	0.11	unclassified_Metazoa	0.09	unclassified_Metazoa_sp	0.04	0	0	0	0	0	0	0	0	0	0	0	0	0	0	0	0	0	0	0	0	0	0	0	0	0	0	0	0	0	0	0	0	0	0
4371e9b0e1752af7b85736c8a897a17fe525ac2b	#N/A	Metazoa	1	unclassified_Metazoa	0.77	unclassified_Metazoa	0.3	unclassified_Metazoa	0.26	unclassified_Metazoa	0.1	unclassified_Metazoa	0.09	unclassified_Metazoa_sp	0.04	0	0	0	0	0	0	0	0	0	0	0	0	0	0	0	0	0	0	0	0	0	0	0	0	19	0	0	0	0	0	0	0	0	0
032164911955c14dbd5531be26570495320db36a	#N/A	Metazoa	0.89	unclassified_Metazoa	0.17	unclassified_Metazoa	0.08	unclassified_Metazoa	0.08	unclassified_Metazoa	0.08	unclassified_Metazoa	0.08	unclassified_Metazoa_sp	0.08	0	0	0	0	0	0	0	0	0	0	0	0	0	0	0	0	0	0	0	0	7	0	0	0	0	0	0	0	0	0	0	3	0	0
0701d18c6688e12a7c2b0917db5770340ab97534	#N/A	Metazoa	0.82	unclassified_Metazoa	0.11	unclassified_Metazoa	0.11	unclassified_Metazoa	0.11	unclassified_Metazoa	0.1	unclassified_Metazoa	0.08	unclassified_Metazoa_sp	0.08	0	0	0	0	0	0	0	0	0	0	0	0	0	0	0	0	0	0	0	0	0	0	0	0	0	0	0	0	0	0	0	0	0	0
0fec01c7f8c72c9d9d892a32d3e76e283266e139	#N/A	Metazoa	0.95	unclassified_Metazoa	0.72	unclassified_Metazoa	0.68	unclassified_Metazoa	0.22	unclassified_Metazoa	0.11	unclassified_Metazoa	0.08	unclassified_Metazoa_sp	0.08	0	0	0	0	0	0	0	0	0	0	0	0	0	0	0	0	0	0	0	0	0	0	0	0	0	0	0	0	0	0	2	0	0	0
21b36fdf4b803635008f25962c2180cc9749e140	#N/A	Metazoa	0.93	unclassified_Metazoa	0.68	unclassified_Metazoa	0.47	unclassified_Metazoa	0.22	unclassified_Metazoa	0.08	unclassified_Metazoa	0.08	unclassified_Metazoa_sp	0.08	0	0	0	0	0	0	0	0	0	0	0	0	0	0	0	0	0	0	0	4	0	0	0	0	0	0	0	0	0	0	0	0	0	0
21f90fdb12795779db6fa4c674677d7b02d08375	#N/A	Metazoa	1	unclassified_Metazoa	0.4	unclassified_Metazoa	0.39	unclassified_Metazoa	0.34	unclassified_Metazoa	0.34	unclassified_Metazoa	0.08	unclassified_Metazoa_sp	0.08	0	0	0	0	0	0	0	0	0	0	0	0	0	0	0	0	0	0	0	0	0	0	0	0	0	0	0	0	0	0	0	0	0	0
2dbbbf55e937840d0c9c1e44ce0a4c0e0a521553	#N/A	Metazoa	0.83	unclassified_Metazoa	0.21	unclassified_Metazoa	0.21	unclassified_Metazoa	0.08	unclassified_Metazoa	0.08	unclassified_Metazoa	0.08	unclassified_Metazoa_sp	0.08	0	0	18	0	0	0	0	0	0	0	0	0	98	0	0	39	10	0	0	0	583	0	0	0	0	0	0	0	0	11	153	283	95	0
306f03be71ceaddc782138673423fa16c4f6fb0b	#N/A	Metazoa	0.81	unclassified_Metazoa	0.11	unclassified_Metazoa	0.08	unclassified_Metazoa	0.08	unclassified_Metazoa	0.08	unclassified_Metazoa	0.08	unclassified_Metazoa_sp	0.08	28	0	0	0	0	0	0	0	0	0	0	0	23	0	0	0	0	0	0	0	0	0	0	0	0	0	0	0	0	0	0	0	0	0
30dcb19b897c3f32f4ba858aff8f230bd47b1a9e	#N/A	Metazoa	0.87	unclassified_Metazoa	0.11	unclassified_Metazoa	0.11	unclassified_Metazoa	0.08	unclassified_Metazoa	0.08	unclassified_Metazoa	0.08	unclassified_Metazoa_sp	0.08	0	0	0	0	0	0	0	0	0	0	0	0	0	0	0	0	0	0	0	0	0	0	0	0	0	0	0	0	0	0	2	0	0	0
49912b55cab7a7f8b866b0df6b584b794543b28d	#N/A	Metazoa	0.82	unclassified_Metazoa	0.45	unclassified_Metazoa	0.19	unclassified_Metazoa	0.08	unclassified_Metazoa	0.08	unclassified_Metazoa	0.08	unclassified_Metazoa_sp	0.08	0	0	0	0	0	0	0	0	0	0	0	0	0	0	0	0	0	0	0	0	2	0	0	0	0	0	0	0	0	0	0	0	0	0
67ef6f620afa11871f1b3198a16df12ddf2794bd	#N/A	Metazoa	0.96	unclassified_Metazoa	0.73	unclassified_Metazoa	0.62	unclassified_Metazoa	0.17	unclassified_Metazoa	0.1	unclassified_Metazoa	0.08	unclassified_Metazoa_sp	0.08	0	0	0	0	0	0	0	0	0	0	0	0	0	0	0	2	0	0	0	0	0	0	0	0	0	0	0	0	0	0	0	0	0	0
6db084c40879b7da34fa99e65197dfa57d27c6cc	#N/A	Metazoa	0.98	unclassified_Metazoa	0.75	unclassified_Metazoa	0.48	unclassified_Metazoa	0.14	unclassified_Metazoa	0.1	unclassified_Metazoa	0.08	unclassified_Metazoa_sp	0.08	0	0	0	0	0	0	0	0	0	0	0	0	0	0	0	0	0	0	0	0	0	0	0	0	0	0	0	0	0	0	0	0	0	0
7fb1020d4144be62941d11e331a54da166f36cbb	#N/A	Metazoa	0.8	unclassified_Metazoa	0.08	unclassified_Metazoa	0.08	unclassified_Metazoa	0.08	unclassified_Metazoa	0.08	unclassified_Metazoa	0.08	unclassified_Metazoa_sp	0.08	0	0	0	0	0	0	0	0	0	0	0	0	0	0	0	0	0	0	0	0	0	0	0	0	0	0	0	0	0	0	13	0	4	0
846ea7e6fe6d2293b4d7b070a8149a67b35d0ecc	#N/A	Metazoa	0.9	unclassified_Metazoa	0.24	unclassified_Metazoa	0.11	unclassified_Metazoa	0.08	unclassified_Metazoa	0.08	unclassified_Metazoa	0.08	unclassified_Metazoa_sp	0.08	0	0	0	0	0	0	2	0	0	0	0	0	0	0	0	0	0	0	0	0	0	0	0	0	0	0	0	0	0	0	0	0	0	0
8d079f0bfb38c998722b88c240b1bd20cd004881	#N/A	Metazoa	0.82	unclassified_Metazoa	0.08	unclassified_Metazoa	0.08	unclassified_Metazoa	0.08	unclassified_Metazoa	0.08	unclassified_Metazoa	0.08	unclassified_Metazoa_sp	0.08	0	0	0	0	0	0	0	0	0	0	0	0	0	0	0	0	0	0	0	0	8	0	0	0	0	0	0	0	0	0	0	0	0	0
8e666836d42d470cb579eb5df2b3ff57f927e989	#N/A	Metazoa	0.86	unclassified_Metazoa	0.41	unclassified_Metazoa	0.22	unclassified_Metazoa	0.1	unclassified_Metazoa	0.08	unclassified_Metazoa	0.08	unclassified_Metazoa_sp	0.08	0	0	0	0	0	0	0	0	0	0	0	0	0	0	0	0	0	0	0	0	0	0	0	0	0	0	0	0	0	0	0	0	0	0
a7f818872692dd55469255f02488346d7dae0a51	#N/A	Metazoa	0.81	unclassified_Metazoa	0.52	unclassified_Metazoa	0.47	unclassified_Metazoa	0.32	unclassified_Metazoa	0.19	unclassified_Metazoa	0.08	unclassified_Metazoa_sp	0.08	0	0	0	0	0	0	0	0	0	0	0	0	0	0	0	0	0	0	0	0	0	0	0	0	0	0	0	0	0	0	0	0	0	0
ab5efa419db19e5635d0d3a011985837d8fae477	#N/A	Metazoa	0.9	unclassified_Metazoa	0.22	unclassified_Metazoa	0.22	unclassified_Metazoa	0.21	unclassified_Metazoa	0.11	unclassified_Metazoa	0.08	unclassified_Metazoa_sp	0.08	0	0	0	0	0	0	0	0	0	0	3	0	0	0	0	0	0	0	0	0	0	0	0	0	0	0	0	0	0	0	0	0	0	0
b949f6d68654961421644c94753f45a6f6f368bb	#N/A	Metazoa	0.86	unclassified_Metazoa	0.43	unclassified_Metazoa	0.15	unclassified_Metazoa	0.15	unclassified_Metazoa	0.08	unclassified_Metazoa	0.08	unclassified_Metazoa_sp	0.08	0	0	0	107	0	0	0	0	0	0	0	0	0	0	0	0	0	0	0	0	0	0	0	0	0	0	0	0	0	6	0	0	8	0
bb9f81dbd7116cd79774025cd2f95c17650f9f27	#N/A	Metazoa	0.82	unclassified_Metazoa	0.08	unclassified_Metazoa	0.08	unclassified_Metazoa	0.08	unclassified_Metazoa	0.08	unclassified_Metazoa	0.08	unclassified_Metazoa_sp	0.08	0	0	0	0	0	0	0	0	0	0	0	0	45	0	0	0	0	0	0	0	0	0	0	0	0	0	0	0	0	0	0	0	0	0
c23b568926caa1c0338b18e1d040855a808d7eb5	#N/A	Metazoa	0.83	unclassified_Metazoa	0.61	unclassified_Metazoa	0.48	unclassified_Metazoa	0.13	unclassified_Metazoa	0.08	unclassified_Metazoa	0.08	unclassified_Metazoa_sp	0.08	0	0	0	0	0	0	0	0	0	0	0	0	0	0	0	0	0	0	0	0	0	0	0	0	0	0	0	0	0	0	0	0	0	0
c2672baac1ce6f03ff8d56e99896f8a7d29f6d7e	#N/A	Metazoa	0.84	unclassified_Metazoa	0.23	unclassified_Metazoa	0.21	unclassified_Metazoa	0.1	unclassified_Metazoa	0.09	unclassified_Metazoa	0.08	unclassified_Metazoa_sp	0.08	0	0	0	0	0	0	0	0	0	0	0	0	0	0	0	0	0	0	0	0	0	0	0	0	0	0	0	0	0	0	0	0	0	0
d499a0c0f780d40a1dd7d7e1bb058ee886e835f8	#N/A	Metazoa	0.96	unclassified_Metazoa	0.61	unclassified_Metazoa	0.42	unclassified_Metazoa	0.28	unclassified_Metazoa	0.09	unclassified_Metazoa	0.08	unclassified_Metazoa_sp	0.08	0	0	0	0	0	0	0	0	0	0	0	0	0	0	0	0	0	0	0	0	0	0	0	0	0	0	0	0	0	0	0	0	0	0
d55c3b5411c412fc90b610a682a5b704ea8f6761	#N/A	Metazoa	0.81	unclassified_Metazoa	0.34	unclassified_Metazoa	0.22	unclassified_Metazoa	0.2	unclassified_Metazoa	0.08	unclassified_Metazoa	0.08	unclassified_Metazoa_sp	0.08	0	0	0	0	0	0	0	0	0	0	0	0	0	0	0	0	0	0	0	0	0	0	0	0	0	0	0	0	0	0	0	0	0	0
d55cefb75cf6eab0c8877000e560695c25c41b2c	#N/A	Metazoa	0.88	unclassified_Metazoa	0.64	unclassified_Metazoa	0.22	unclassified_Metazoa	0.17	unclassified_Metazoa	0.09	unclassified_Metazoa	0.08	unclassified_Metazoa_sp	0.08	0	0	0	0	0	0	0	0	0	0	0	0	0	0	0	0	0	0	0	0	0	0	0	0	0	0	0	0	0	3	0	0	0	0
db95154cf3dee57f2cce3eb520e0cfcbf2ba422d	#N/A	Metazoa	0.95	unclassified_Metazoa	0.33	unclassified_Metazoa	0.33	unclassified_Metazoa	0.08	unclassified_Metazoa	0.08	unclassified_Metazoa	0.08	unclassified_Metazoa_sp	0.08	0	0	0	0	0	0	0	0	0	0	0	0	0	0	0	2	0	0	0	0	0	3	0	0	0	0	0	0	0	0	0	0	0	0
e1229ffc50e3a2b19ed1d67538f16909a9cf6539	#N/A	Metazoa	0.85	unclassified_Metazoa	0.46	unclassified_Metazoa	0.35	unclassified_Metazoa	0.22	unclassified_Metazoa	0.08	unclassified_Metazoa	0.08	unclassified_Metazoa_sp	0.08	0	0	0	0	0	0	0	0	0	0	0	0	0	0	0	0	0	0	0	0	0	0	0	0	0	0	15	0	0	0	0	0	0	0
f2d5b628c1b65227f48bdfb4a7fa0f4c88895f9c	#N/A	Metazoa	0.81	unclassified_Metazoa	0.42	unclassified_Metazoa	0.41	unclassified_Metazoa	0.14	unclassified_Metazoa	0.08	unclassified_Metazoa	0.08	unclassified_Metazoa_sp	0.08	0	0	4	0	0	0	6	2	0	9	0	0	0	0	0	0	0	0	0	0	0	0	0	0	0	0	0	0	0	2	0	0	0	4
fe16a2249b81b2084f801fd14eb7bb03229ef2d3	#N/A	Metazoa	0.9	unclassified_Metazoa	0.38	unclassified_Metazoa	0.09	unclassified_Metazoa	0.09	unclassified_Metazoa	0.08	unclassified_Metazoa	0.08	unclassified_Metazoa_sp	0.08	0	0	0	0	0	0	0	0	0	0	0	0	0	2	0	0	0	0	0	0	0	0	0	0	0	0	0	0	0	0	0	0	0	0
c390e16c47ac59f81e4a19e03a81bfee97b643a2	#N/A	Metazoa	0.83	unclassified_Metazoa	0.21	unclassified_Metazoa	0.2	unclassified_Metazoa	0.13	unclassified_Metazoa	0.08	unclassified_Metazoa	0.08	unclassified_Metazoa_sp	0.07	0	0	0	0	0	0	0	0	0	0	0	0	0	0	0	0	0	0	0	3	0	0	0	0	0	0	0	0	0	0	0	3	0	0
06ce69de366071216bca31d56678c9bd0dada0a9	#N/A	Metazoa	0.8	unclassified_Metazoa	0.29	unclassified_Metazoa	0.29	unclassified_Metazoa	0.21	unclassified_Metazoa	0.14	unclassified_Metazoa	0.08	unclassified_Metazoa_sp	0.06	0	0	0	0	0	0	0	0	0	0	0	0	0	0	0	0	0	0	0	0	0	0	0	0	0	0	0	0	0	0	0	3	0	0
7d61acf6b562206847812f1bb35b012201d5c4f3	#N/A	Metazoa	0.94	unclassified_Metazoa	0.21	unclassified_Metazoa	0.21	unclassified_Metazoa	0.08	unclassified_Metazoa	0.08	unclassified_Metazoa	0.08	unclassified_Metazoa_sp	0.06	0	0	0	5	0	0	0	0	0	0	0	0	0	0	0	0	0	0	0	0	0	0	0	0	0	0	0	0	0	0	0	0	0	0
a5ef4e15892cb9d596f86e9a481117484fafc149	#N/A	Metazoa	0.89	unclassified_Metazoa	0.55	unclassified_Metazoa	0.37	unclassified_Metazoa	0.12	unclassified_Metazoa	0.12	unclassified_Metazoa	0.08	unclassified_Metazoa_sp	0.06	0	0	0	0	0	0	0	0	0	0	0	0	0	0	0	0	0	6	0	0	0	3	0	0	0	0	0	0	0	6	0	0	0	0
f77e80fc2d2dc568b56be5a524fc5be7b0f64dd7	#N/A	Metazoa	0.85	unclassified_Metazoa	0.25	unclassified_Metazoa	0.15	unclassified_Metazoa	0.08	unclassified_Metazoa	0.08	unclassified_Metazoa	0.08	unclassified_Metazoa_sp	0.06	0	0	0	0	0	25	0	0	0	0	0	0	0	0	0	0	0	0	0	0	0	0	0	0	0	0	0	0	0	0	0	0	0	0
088e5304e1b2b589e76b481bf2994aa8f59a163f	#N/A	Metazoa	0.98	unclassified_Metazoa	0.72	unclassified_Metazoa	0.3	unclassified_Metazoa	0.17	unclassified_Metazoa	0.08	unclassified_Metazoa	0.08	unclassified_Metazoa_sp	0.05	0	0	0	0	0	4	0	0	0	0	0	0	0	0	0	0	0	0	0	0	0	0	0	0	0	0	0	0	0	0	0	0	0	0
13917413e9e04bc6f7ca6c3fc4d3852a69d01018	#N/A	Metazoa	0.99	unclassified_Metazoa	0.32	unclassified_Metazoa	0.28	unclassified_Metazoa	0.1	unclassified_Metazoa	0.1	unclassified_Metazoa	0.08	unclassified_Metazoa_sp	0.04	0	0	0	0	0	0	0	0	0	0	0	0	0	0	0	0	0	0	5	0	0	0	0	0	0	0	0	0	0	0	0	0	0	0
3a6e64369fc26b475aa2a6ede3f7a836e2f2c01d	#N/A	Metazoa	0.92	unclassified_Metazoa	0.47	unclassified_Metazoa	0.25	unclassified_Metazoa	0.1	unclassified_Metazoa	0.08	unclassified_Metazoa	0.08	unclassified_Metazoa_sp	0.03	0	0	0	0	0	0	0	0	0	0	0	0	3	0	0	0	0	0	0	0	0	0	0	0	0	0	0	0	0	0	0	0	0	0
8dcf94d103b7094b27adb4694e1087841c0947a5	#N/A	Metazoa	0.83	unclassified_Metazoa	0.69	unclassified_Metazoa	0.51	unclassified_Metazoa	0.38	unclassified_Metazoa	0.16	unclassified_Metazoa	0.08	unclassified_Metazoa_sp	0.03	0	0	0	0	0	0	0	0	0	0	0	0	0	0	0	0	0	0	0	0	0	0	2	0	0	0	0	0	0	0	0	0	0	3
03c4e3cd3e2e289cac2b7d45e457e505ea2be56b	#N/A	Metazoa	0.8	unclassified_Metazoa	0.07	unclassified_Metazoa	0.07	unclassified_Metazoa	0.07	unclassified_Metazoa	0.07	unclassified_Metazoa	0.07	unclassified_Metazoa_sp	0.07	0	0	0	0	0	0	0	0	0	0	0	0	0	0	0	0	0	0	0	0	10	0	0	0	0	0	0	0	0	0	0	0	0	0
05384c56fc335f20976db155352a04d9000de957	#N/A	Metazoa	0.95	unclassified_Metazoa	0.73	unclassified_Metazoa	0.47	unclassified_Metazoa	0.42	unclassified_Metazoa	0.08	unclassified_Metazoa	0.07	unclassified_Metazoa_sp	0.07	0	0	0	0	0	0	0	0	0	0	0	0	0	0	0	0	0	0	0	0	0	0	0	0	0	2	0	0	0	0	0	0	0	0
216ba7309adfc555747d059fe469a38048db0bbe	#N/A	Metazoa	0.99	unclassified_Metazoa	0.12	unclassified_Metazoa	0.1	unclassified_Metazoa	0.07	unclassified_Metazoa	0.07	unclassified_Metazoa	0.07	unclassified_Metazoa_sp	0.07	0	0	0	0	0	0	0	0	0	0	0	0	0	0	0	0	0	0	0	0	0	0	0	0	0	0	3	0	0	0	0	0	0	0
24fd8d42f77186a29fbb95233710e8fc79f6ad63	#N/A	Metazoa	0.91	unclassified_Metazoa	0.51	unclassified_Metazoa	0.09	unclassified_Metazoa	0.08	unclassified_Metazoa	0.07	unclassified_Metazoa	0.07	unclassified_Metazoa_sp	0.07	0	0	0	0	0	0	0	0	0	0	0	0	0	0	0	0	0	0	0	0	0	0	0	0	0	0	0	0	0	0	0	3	0	0
2de3e31e50980c5151baba0176f908fe6a71ed5c	#N/A	Metazoa	0.96	unclassified_Metazoa	0.78	unclassified_Metazoa	0.07	unclassified_Metazoa	0.07	unclassified_Metazoa	0.07	unclassified_Metazoa	0.07	unclassified_Metazoa_sp	0.07	0	0	0	0	0	0	0	0	0	0	0	0	0	0	0	0	3	0	0	0	0	0	0	0	0	0	0	0	0	0	0	0	0	0
36b49adf1ee1e04a9e29d9ded3d5274696663c8a	#N/A	Metazoa	0.84	unclassified_Metazoa	0.23	unclassified_Metazoa	0.16	unclassified_Metazoa	0.16	unclassified_Metazoa	0.08	unclassified_Metazoa	0.07	unclassified_Metazoa_sp	0.07	0	0	0	0	0	0	0	0	0	0	0	0	0	0	0	0	0	0	0	0	0	0	0	0	0	0	0	0	0	0	0	0	0	0
409f65f916fe88315ad4dc01bf639e4b52c976c9	#N/A	Metazoa	0.98	unclassified_Metazoa	0.77	unclassified_Metazoa	0.51	unclassified_Metazoa	0.4	unclassified_Metazoa	0.07	unclassified_Metazoa	0.07	unclassified_Metazoa_sp	0.07	0	0	0	0	0	0	0	5	0	0	0	0	0	0	0	0	0	0	0	0	0	0	0	0	0	0	0	0	0	0	0	0	0	0
48db4e19e70a537ecd530f6d3c6801a112d54d44	#N/A	Metazoa	0.95	unclassified_Metazoa	0.69	unclassified_Metazoa	0.59	unclassified_Metazoa	0.25	unclassified_Metazoa	0.08	unclassified_Metazoa	0.07	unclassified_Metazoa_sp	0.07	0	0	0	0	0	0	0	0	0	0	0	0	0	0	0	0	0	0	0	0	0	0	0	0	0	0	0	0	2	0	0	0	0	0
4ad849c6b34695c59893799f85701bf83c2ae07c	#N/A	Metazoa	0.8	unclassified_Metazoa	0.15	unclassified_Metazoa	0.07	unclassified_Metazoa	0.07	unclassified_Metazoa	0.07	unclassified_Metazoa	0.07	unclassified_Metazoa_sp	0.07	0	0	0	0	0	0	0	0	0	0	0	0	0	0	0	0	0	0	0	0	0	0	0	0	0	0	0	0	0	0	0	100	3	0
4e8b1a95e12178c82e1677a94dc5f92d65eaf0a0	#N/A	Metazoa	0.81	unclassified_Metazoa	0.56	unclassified_Metazoa	0.26	unclassified_Metazoa	0.2	unclassified_Metazoa	0.07	unclassified_Metazoa	0.07	unclassified_Metazoa_sp	0.07	0	0	0	0	0	0	0	0	0	0	0	0	0	0	0	0	0	0	0	0	0	0	0	0	0	0	0	0	0	0	0	0	0	0
59860aaf16e5a30f2be7fa8d03a171dda9be5dbf	#N/A	Metazoa	0.81	unclassified_Metazoa	0.12	unclassified_Metazoa	0.1	unclassified_Metazoa	0.07	unclassified_Metazoa	0.07	unclassified_Metazoa	0.07	unclassified_Metazoa_sp	0.07	0	0	0	0	0	0	0	0	0	0	0	0	0	0	0	0	0	0	0	0	0	0	0	0	0	0	0	0	0	0	0	0	0	0
5e5ea0199a1292a60ab9341d828e7521a28c462a	#N/A	Metazoa	0.82	unclassified_Metazoa	0.31	unclassified_Metazoa	0.14	unclassified_Metazoa	0.09	unclassified_Metazoa	0.07	unclassified_Metazoa	0.07	unclassified_Metazoa_sp	0.07	0	0	0	0	0	0	0	0	0	0	0	0	0	0	0	0	0	0	0	0	0	0	0	0	0	0	0	0	0	0	2	0	0	2
62246f126a74082fcfff4610ed41ba2c20b1c409	#N/A	Metazoa	0.81	unclassified_Metazoa	0.27	unclassified_Metazoa	0.27	unclassified_Metazoa	0.08	unclassified_Metazoa	0.07	unclassified_Metazoa	0.07	unclassified_Metazoa_sp	0.07	0	0	0	2	0	0	0	0	0	0	0	0	0	0	0	0	0	0	0	0	0	0	0	0	0	0	0	0	0	0	0	0	0	0
6dc64dbcef22f6b30d55b2153194ba7657671c9f	#N/A	Metazoa	1	unclassified_Metazoa	0.73	unclassified_Metazoa	0.4	unclassified_Metazoa	0.07	unclassified_Metazoa	0.07	unclassified_Metazoa	0.07	unclassified_Metazoa_sp	0.07	0	0	0	0	0	0	0	0	0	0	0	0	0	0	0	0	5	0	0	0	0	0	0	0	0	0	0	0	0	0	0	0	0	0
6feafc11fb643e3daa162e053af69659c690f8d3	#N/A	Metazoa	0.99	unclassified_Metazoa	0.11	unclassified_Metazoa	0.07	unclassified_Metazoa	0.07	unclassified_Metazoa	0.07	unclassified_Metazoa	0.07	unclassified_Metazoa_sp	0.07	0	0	0	0	0	0	0	0	0	0	0	0	0	0	0	0	0	7	0	0	0	0	0	0	0	0	0	0	0	0	0	0	0	0
7d62fb6b88347584c562ceeb2fdfc1d8660c201d	#N/A	Metazoa	0.9	unclassified_Metazoa	0.78	unclassified_Metazoa	0.51	unclassified_Metazoa	0.09	unclassified_Metazoa	0.07	unclassified_Metazoa	0.07	unclassified_Metazoa_sp	0.07	0	0	0	0	0	3	0	0	0	0	0	0	0	0	0	0	14	0	0	0	0	0	0	0	0	0	0	0	0	6	0	0	0	0
84742a4085a4a3fc5cff4c99787165ed202a5be4	#N/A	Metazoa	0.99	unclassified_Metazoa	0.65	unclassified_Metazoa	0.35	unclassified_Metazoa	0.14	unclassified_Metazoa	0.07	unclassified_Metazoa	0.07	unclassified_Metazoa_sp	0.07	0	0	0	0	0	0	0	0	0	0	0	0	0	0	0	0	0	2	0	0	0	0	0	0	0	0	0	0	0	0	0	0	0	0
91d78dab2e53b25aad8be508a54e43f724675c9d	#N/A	Metazoa	0.96	unclassified_Metazoa	0.5	unclassified_Metazoa	0.48	unclassified_Metazoa	0.31	unclassified_Metazoa	0.31	unclassified_Metazoa	0.07	unclassified_Metazoa_sp	0.07	0	0	0	0	0	0	0	0	0	0	0	0	0	0	0	0	0	0	0	0	0	0	0	0	0	0	0	0	0	0	0	0	0	0
953adfc7eb6b6f4f9ef43203361acb2feb9b3ee6	#N/A	Metazoa	0.85	unclassified_Metazoa	0.2	unclassified_Metazoa	0.07	unclassified_Metazoa	0.07	unclassified_Metazoa	0.07	unclassified_Metazoa	0.07	unclassified_Metazoa_sp	0.07	0	0	0	0	0	0	0	0	0	0	0	0	0	0	0	0	17	0	0	0	0	0	0	0	0	0	0	0	0	0	0	0	0	0
99560ae28631bf655951e193f21b18395defc3c9	#N/A	Metazoa	0.86	unclassified_Metazoa	0.08	unclassified_Metazoa	0.08	unclassified_Metazoa	0.08	unclassified_Metazoa	0.07	unclassified_Metazoa	0.07	unclassified_Metazoa_sp	0.07	0	0	0	0	0	0	0	0	0	0	0	0	0	0	0	0	0	0	0	0	0	0	0	0	0	0	0	0	0	0	0	0	0	0
a04269d1c1841489e04773222d87f92054c556ed	#N/A	Metazoa	0.96	unclassified_Metazoa	0.79	unclassified_Metazoa	0.19	unclassified_Metazoa	0.07	unclassified_Metazoa	0.07	unclassified_Metazoa	0.07	unclassified_Metazoa_sp	0.07	0	0	0	0	0	0	0	0	0	0	0	0	0	0	0	0	0	0	0	0	0	0	0	0	0	0	0	0	0	0	0	0	0	0
a83be7105bdd0c81be3e495e89e7c6a668b75e9a	#N/A	Metazoa	0.81	unclassified_Metazoa	0.49	unclassified_Metazoa	0.35	unclassified_Metazoa	0.12	unclassified_Metazoa	0.07	unclassified_Metazoa	0.07	unclassified_Metazoa_sp	0.07	0	0	0	0	0	0	0	0	0	0	0	0	0	0	0	0	0	34	0	0	0	0	0	0	0	0	0	0	0	0	0	0	0	0
aacca4bd945db1af2c59c053e6991345bbaa9120	#N/A	Metazoa	0.89	unclassified_Metazoa	0.08	unclassified_Metazoa	0.08	unclassified_Metazoa	0.07	unclassified_Metazoa	0.07	unclassified_Metazoa	0.07	unclassified_Metazoa_sp	0.07	0	0	0	0	0	0	0	0	0	0	0	0	0	0	0	0	0	0	0	0	0	0	0	0	0	0	0	0	0	0	0	0	2	0
ab75ea37dcc2e15177da9723f410ed57acefde51	#N/A	Metazoa	0.85	unclassified_Metazoa	0.69	unclassified_Metazoa	0.64	unclassified_Metazoa	0.41	unclassified_Metazoa	0.16	unclassified_Metazoa	0.07	unclassified_Metazoa_sp	0.07	0	0	0	0	0	0	0	0	0	0	0	0	0	0	0	0	0	0	0	0	0	0	0	0	0	0	0	0	0	0	0	0	0	0
afc19da096bd5154c982aa549457e71690d19f56	#N/A	Metazoa	0.94	unclassified_Metazoa	0.58	unclassified_Metazoa	0.27	unclassified_Metazoa	0.09	unclassified_Metazoa	0.08	unclassified_Metazoa	0.07	unclassified_Metazoa_sp	0.07	0	0	0	0	0	0	0	0	0	0	0	0	0	0	0	0	0	0	0	0	0	0	0	0	0	0	0	0	0	0	0	0	0	0
b451e3f039f21890f6b2ad2fdaafd7ca5702bcef	#N/A	Metazoa	0.82	unclassified_Metazoa	0.61	unclassified_Metazoa	0.47	unclassified_Metazoa	0.21	unclassified_Metazoa	0.07	unclassified_Metazoa	0.07	unclassified_Metazoa_sp	0.07	0	0	0	0	0	0	0	0	0	0	0	0	0	0	0	0	0	0	0	0	0	0	0	0	0	0	0	0	0	0	0	0	0	0
b9da3104407810d3c3c07cabecf91096f2322bb5	#N/A	Metazoa	0.8	unclassified_Metazoa	0.07	unclassified_Metazoa	0.07	unclassified_Metazoa	0.07	unclassified_Metazoa	0.07	unclassified_Metazoa	0.07	unclassified_Metazoa_sp	0.07	0	0	0	0	0	0	0	0	0	0	0	3	0	0	0	0	0	0	0	0	0	0	0	0	0	0	0	0	0	0	0	0	5	0
bd6e80dbe70aa4ba680aba0746c0353fbda4e233	#N/A	Metazoa	0.83	unclassified_Metazoa	0.38	unclassified_Metazoa	0.07	unclassified_Metazoa	0.07	unclassified_Metazoa	0.07	unclassified_Metazoa	0.07	unclassified_Metazoa_sp	0.07	0	0	0	0	0	0	0	0	0	0	0	0	13	5	0	0	25	0	0	0	0	0	0	0	0	0	0	0	0	0	0	0	0	0
c624fd01c666e82a56fbdc7199141e4b0096339b	#N/A	Metazoa	0.83	unclassified_Metazoa	0.4	unclassified_Metazoa	0.18	unclassified_Metazoa	0.07	unclassified_Metazoa	0.07	unclassified_Metazoa	0.07	unclassified_Metazoa_sp	0.07	0	0	0	0	0	0	0	0	0	0	0	0	0	0	0	0	0	0	0	0	0	0	0	0	0	0	0	0	0	0	0	17	34	0
d67b532c78ceeccaef6eaa4b0ef5cbcb6b57e159	#N/A	Metazoa	0.9	unclassified_Metazoa	0.26	unclassified_Metazoa	0.26	unclassified_Metazoa	0.08	unclassified_Metazoa	0.07	unclassified_Metazoa	0.07	unclassified_Metazoa_sp	0.07	0	0	0	0	0	0	0	0	0	0	0	0	0	0	0	0	0	0	0	0	0	0	0	0	0	0	0	0	0	0	0	0	0	0
d76682ba0207ccd9d88ae34e703601522486f345	#N/A	Metazoa	0.8	unclassified_Metazoa	0.15	unclassified_Metazoa	0.15	unclassified_Metazoa	0.11	unclassified_Metazoa	0.07	unclassified_Metazoa	0.07	unclassified_Metazoa_sp	0.07	0	0	0	0	0	0	0	0	0	0	0	0	0	0	0	0	0	0	0	0	0	0	29	0	0	0	0	0	0	0	0	0	0	0
dee7655fd9b45aeccff2efe7d302872e814d2f96	#N/A	Metazoa	0.99	unclassified_Metazoa	0.16	unclassified_Metazoa	0.13	unclassified_Metazoa	0.08	unclassified_Metazoa	0.07	unclassified_Metazoa	0.07	unclassified_Metazoa_sp	0.07	0	0	0	0	0	0	0	0	0	0	0	0	0	0	0	0	0	0	0	0	11	0	0	0	0	0	0	0	0	0	0	0	0	0
e32dac0f1be6bbcce8aaaa7c4b0f0b131b220b33	#N/A	Metazoa	0.81	unclassified_Metazoa	0.18	unclassified_Metazoa	0.18	unclassified_Metazoa	0.07	unclassified_Metazoa	0.07	unclassified_Metazoa	0.07	unclassified_Metazoa_sp	0.07	0	0	0	0	0	0	0	0	0	0	0	0	0	0	0	0	0	0	0	0	61	0	0	0	0	0	0	0	0	0	0	0	5	0
fb27e936794da2443a8d4efe89047641e5daec90	#N/A	Metazoa	0.86	unclassified_Metazoa	0.42	unclassified_Metazoa	0.36	unclassified_Metazoa	0.16	unclassified_Metazoa	0.07	unclassified_Metazoa	0.07	unclassified_Metazoa_sp	0.07	0	0	0	0	0	0	0	0	0	14	0	0	0	0	0	0	0	0	0	0	0	0	0	0	0	0	0	0	0	0	0	0	0	0
0cb7ddec7d0e2fbd28f229a2b02ba4fd296f38b6	#N/A	Metazoa	0.85	unclassified_Metazoa	0.66	unclassified_Metazoa	0.38	unclassified_Metazoa	0.16	unclassified_Metazoa	0.11	unclassified_Metazoa	0.07	unclassified_Metazoa_sp	0.06	0	0	0	0	0	0	0	0	0	0	0	0	0	0	0	0	0	0	0	0	0	0	0	0	0	0	0	0	0	3	0	0	0	0
0f534e006773209c27ef814d9d1e94ba2cc5374b	#N/A	Metazoa	0.92	unclassified_Metazoa	0.71	unclassified_Metazoa	0.29	unclassified_Metazoa	0.23	unclassified_Metazoa	0.08	unclassified_Metazoa	0.07	unclassified_Metazoa_sp	0.06	0	0	0	2	0	0	0	0	0	0	0	0	0	0	0	0	0	0	0	0	0	0	0	0	0	0	0	0	0	0	0	7	0	0
14f302ae6c476c6a066f5d8a4218d64bfec22618	#N/A	Metazoa	0.85	unclassified_Metazoa	0.26	unclassified_Metazoa	0.26	unclassified_Metazoa	0.2	unclassified_Metazoa	0.07	unclassified_Metazoa	0.07	unclassified_Metazoa_sp	0.06	0	0	0	0	0	0	0	0	0	2	0	0	0	0	0	0	0	0	0	0	0	0	0	0	0	0	0	0	0	0	3	22	0	0
3166f6816ec580c57f0d6129e20dd8015786b282	#N/A	Metazoa	0.89	unclassified_Metazoa	0.78	unclassified_Metazoa	0.69	unclassified_Metazoa	0.32	unclassified_Metazoa	0.13	unclassified_Metazoa	0.07	unclassified_Metazoa_sp	0.06	0	0	0	0	0	0	0	0	0	0	0	0	0	0	0	0	0	0	0	0	0	0	0	0	0	0	0	0	0	0	0	0	2	0
784c1a07eb4102bc0bcec4d2e15e0b0e6db2d3ab	#N/A	Metazoa	0.97	unclassified_Metazoa	0.17	unclassified_Metazoa	0.16	unclassified_Metazoa	0.09	unclassified_Metazoa	0.07	unclassified_Metazoa	0.07	unclassified_Metazoa_sp	0.06	0	0	0	0	0	0	0	0	0	0	0	0	0	0	0	0	0	0	0	0	0	0	0	0	0	0	0	0	0	0	0	0	0	9
ba16a83c3f5dd53f209bbb0c5d9acb54e57ac306	#N/A	Metazoa	0.89	unclassified_Metazoa	0.66	unclassified_Metazoa	0.42	unclassified_Metazoa	0.4	unclassified_Metazoa	0.3	unclassified_Metazoa	0.07	unclassified_Metazoa_sp	0.06	0	0	0	0	0	0	0	0	0	0	0	0	0	2	0	0	0	0	0	0	0	0	0	0	0	0	0	0	0	0	0	0	0	0
bdb36221f562d9165ee1c219abb710d2556ce920	#N/A	Metazoa	0.99	unclassified_Metazoa	0.76	unclassified_Metazoa	0.4	unclassified_Metazoa	0.1	unclassified_Metazoa	0.07	unclassified_Metazoa	0.07	unclassified_Metazoa_sp	0.06	15	0	19	0	0	0	0	0	0	0	0	0	0	0	0	0	0	0	0	0	0	0	2	0	0	0	0	0	3	81	0	98	0	0
e92ffccf9670257f784e9dd29316b92a4584d20e	#N/A	Metazoa	0.85	unclassified_Metazoa	0.54	unclassified_Metazoa	0.42	unclassified_Metazoa	0.25	unclassified_Metazoa	0.13	unclassified_Metazoa	0.07	unclassified_Metazoa_sp	0.06	0	0	2	0	0	0	0	0	0	0	29	0	0	0	0	0	0	0	0	0	0	0	0	0	0	0	0	0	0	0	0	0	0	0
ea193b87e3fae24d42598015bb5782304ee64ade	#N/A	Metazoa	0.91	unclassified_Metazoa	0.24	unclassified_Metazoa	0.17	unclassified_Metazoa	0.11	unclassified_Metazoa	0.11	unclassified_Metazoa	0.07	unclassified_Metazoa_sp	0.06	0	0	0	0	0	0	0	0	0	0	0	0	0	0	0	0	0	0	0	0	0	0	0	0	0	0	0	0	0	0	0	0	0	0
560f23a884eb186b511385dd6730b96fb3cde245	#N/A	Metazoa	0.9	unclassified_Metazoa	0.18	unclassified_Metazoa	0.18	unclassified_Metazoa	0.11	unclassified_Metazoa	0.08	unclassified_Metazoa	0.07	unclassified_Metazoa_sp	0.05	0	0	0	0	0	0	0	0	0	0	0	0	0	0	0	0	0	3	0	0	3	0	7	0	0	0	0	0	0	0	0	0	8	0
776024ec2e6d9b2f6da5f38600e6b4240eb6a18f	#N/A	Metazoa	0.83	unclassified_Metazoa	0.79	unclassified_Metazoa	0.46	unclassified_Metazoa	0.38	unclassified_Metazoa	0.07	unclassified_Metazoa	0.07	unclassified_Metazoa_sp	0.05	0	0	0	0	0	0	0	0	0	0	0	0	0	0	0	0	0	0	0	0	0	0	0	0	0	0	0	0	0	0	0	0	0	5
aae0ee50bcf9ae4070bf211f4596ce226d7bcb42	#N/A	Metazoa	0.83	unclassified_Metazoa	0.36	unclassified_Metazoa	0.25	unclassified_Metazoa	0.11	unclassified_Metazoa	0.07	unclassified_Metazoa	0.07	unclassified_Metazoa_sp	0.05	0	0	0	0	0	0	0	0	0	0	0	0	0	0	0	0	0	0	0	0	0	0	0	0	0	0	0	0	0	0	3	0	0	0
050d6a68850bcda45272999c1a6329c225561495	#N/A	Metazoa	0.95	unclassified_Metazoa	0.58	unclassified_Metazoa	0.4	unclassified_Metazoa	0.11	unclassified_Metazoa	0.11	unclassified_Metazoa	0.07	unclassified_Metazoa_sp	0.04	0	0	0	0	0	0	0	0	0	0	0	0	0	0	0	0	0	0	0	0	0	0	0	0	0	0	0	0	0	0	0	0	0	0
0f2b0e494d3bcf5ce35cd3a21b78c2bfa637ec9c	#N/A	Metazoa	0.8	unclassified_Metazoa	0.48	unclassified_Metazoa	0.28	unclassified_Metazoa	0.16	unclassified_Metazoa	0.07	unclassified_Metazoa	0.07	unclassified_Metazoa_sp	0.03	0	0	0	0	0	0	0	0	0	0	0	0	0	0	0	0	0	0	0	14	0	0	0	0	0	0	0	0	0	0	0	0	0	0
2cee80aa586772f86d41a640e601237bc389ddc2	#N/A	Metazoa	0.91	unclassified_Metazoa	0.73	unclassified_Metazoa	0.26	unclassified_Metazoa	0.09	unclassified_Metazoa	0.09	unclassified_Metazoa	0.07	unclassified_Metazoa_sp	0.03	0	0	0	0	0	0	0	0	0	0	0	0	0	0	0	0	0	0	0	0	0	0	0	0	0	0	0	0	0	0	0	0	3	0
06047ce817ec308e666e8309dacb0f59cfcf016d	#N/A	Metazoa	0.98	unclassified_Metazoa	0.11	unclassified_Metazoa	0.11	unclassified_Metazoa	0.11	unclassified_Metazoa	0.06	unclassified_Metazoa	0.06	unclassified_Metazoa_sp	0.06	0	0	0	0	0	0	0	0	0	0	0	0	0	0	0	0	0	0	0	0	0	0	0	0	0	0	0	0	0	2	0	3	0	0
07d78d5e84a93864ff10ba92262699aa5d0d73fe	#N/A	Metazoa	0.88	unclassified_Metazoa	0.07	unclassified_Metazoa	0.07	unclassified_Metazoa	0.07	unclassified_Metazoa	0.07	unclassified_Metazoa	0.06	unclassified_Metazoa_sp	0.06	0	0	0	0	0	0	0	0	0	0	0	0	0	0	0	0	0	0	0	0	0	0	0	0	0	0	0	14	0	0	0	0	0	0
0e3a2401df9a8685b6cc8b214974a36269080dc7	#N/A	Metazoa	0.99	unclassified_Metazoa	0.57	unclassified_Metazoa	0.24	unclassified_Metazoa	0.06	unclassified_Metazoa	0.06	unclassified_Metazoa	0.06	unclassified_Metazoa_sp	0.06	0	0	0	0	0	0	0	0	0	0	0	0	0	0	0	0	0	0	0	0	0	0	0	0	0	0	0	0	0	0	0	0	0	0
23326c4b0b069b33b609727969254aa4e706ff30	#N/A	Metazoa	0.85	unclassified_Metazoa	0.79	unclassified_Metazoa	0.48	unclassified_Metazoa	0.1	unclassified_Metazoa	0.07	unclassified_Metazoa	0.06	unclassified_Metazoa_sp	0.06	0	0	0	0	0	0	0	0	0	0	0	0	0	0	0	0	0	0	0	0	0	0	0	0	0	0	0	0	0	0	0	0	0	0
3411701447245591d3ebb10bf38903de4e5c8350	#N/A	Metazoa	0.85	unclassified_Metazoa	0.42	unclassified_Metazoa	0.11	unclassified_Metazoa	0.06	unclassified_Metazoa	0.06	unclassified_Metazoa	0.06	unclassified_Metazoa_sp	0.06	0	0	0	0	0	0	0	0	0	0	0	0	0	0	0	0	0	9	0	0	0	0	0	0	0	0	0	0	0	0	0	0	0	0
34a55dfd8c94e950d0a248e7697e3bcb9b6cc589	#N/A	Metazoa	0.99	unclassified_Metazoa	0.1	unclassified_Metazoa	0.1	unclassified_Metazoa	0.1	unclassified_Metazoa	0.06	unclassified_Metazoa	0.06	unclassified_Metazoa_sp	0.06	0	0	0	0	0	0	0	0	0	0	0	0	0	0	0	0	0	0	0	0	0	0	0	0	0	0	0	0	0	0	0	0	0	0
38f47ce572ff28cc750cf205647d32cbdb5ff3e4	#N/A	Metazoa	0.8	unclassified_Metazoa	0.51	unclassified_Metazoa	0.34	unclassified_Metazoa	0.07	unclassified_Metazoa	0.06	unclassified_Metazoa	0.06	unclassified_Metazoa_sp	0.06	0	0	0	0	0	0	0	0	0	0	0	0	0	0	0	0	0	0	0	0	0	0	0	0	0	0	0	0	0	0	0	0	0	2
3a95c1583579dcfccd9dfeea030b216a4edd5c49	#N/A	Metazoa	0.86	unclassified_Metazoa	0.06	unclassified_Metazoa	0.06	unclassified_Metazoa	0.06	unclassified_Metazoa	0.06	unclassified_Metazoa	0.06	unclassified_Metazoa_sp	0.06	0	0	0	0	0	0	0	0	0	0	0	0	0	0	0	0	0	0	0	0	0	0	0	0	0	0	0	0	0	0	0	0	0	0
4099fcdd216bb406736a9a1df894a46803f3b6df	#N/A	Metazoa	0.85	unclassified_Metazoa	0.73	unclassified_Metazoa	0.43	unclassified_Metazoa	0.1	unclassified_Metazoa	0.06	unclassified_Metazoa	0.06	unclassified_Metazoa_sp	0.06	0	0	0	0	0	0	0	0	0	0	0	0	0	0	0	0	0	0	0	0	0	0	0	0	0	0	2	0	0	0	0	0	0	0
483de463cd7d3e81d714037b9847d148c13aef42	#N/A	Metazoa	0.84	unclassified_Metazoa	0.66	unclassified_Metazoa	0.44	unclassified_Metazoa	0.33	unclassified_Metazoa	0.07	unclassified_Metazoa	0.06	unclassified_Metazoa_sp	0.06	0	0	0	0	0	0	0	0	0	0	0	0	0	0	0	0	0	0	0	0	0	0	0	0	0	0	0	0	0	0	2	11	0	0
5241f3e250efa99413eb8874b810c5085eb9df5b	#N/A	Metazoa	0.95	unclassified_Metazoa	0.7	unclassified_Metazoa	0.36	unclassified_Metazoa	0.18	unclassified_Metazoa	0.06	unclassified_Metazoa	0.06	unclassified_Metazoa_sp	0.06	0	0	0	0	0	0	0	2	0	0	0	0	0	0	0	0	0	0	0	0	0	0	0	0	0	0	0	0	0	0	0	0	0	0
58269c7cd917549cb1e99de22557abd824a90c87	#N/A	Metazoa	0.92	unclassified_Metazoa	0.06	unclassified_Metazoa	0.06	unclassified_Metazoa	0.06	unclassified_Metazoa	0.06	unclassified_Metazoa	0.06	unclassified_Metazoa_sp	0.06	0	0	0	0	0	0	0	0	0	0	0	0	0	0	0	0	0	0	0	0	0	0	0	0	0	0	0	0	0	0	0	0	0	0
5a719e4731cd251bc99c747425b357bdb9da5c34	#N/A	Metazoa	0.84	unclassified_Metazoa	0.64	unclassified_Metazoa	0.51	unclassified_Metazoa	0.29	unclassified_Metazoa	0.08	unclassified_Metazoa	0.06	unclassified_Metazoa_sp	0.06	0	0	0	0	0	0	0	0	0	0	0	0	0	0	0	0	0	0	0	0	0	0	0	0	0	0	0	0	0	0	2	0	0	0
637815cda1e397471c7f8060f7ee383f625845ce	#N/A	Metazoa	0.84	unclassified_Metazoa	0.52	unclassified_Metazoa	0.37	unclassified_Metazoa	0.26	unclassified_Metazoa	0.06	unclassified_Metazoa	0.06	unclassified_Metazoa_sp	0.06	0	0	0	0	0	0	0	0	0	0	0	0	0	0	0	0	0	0	0	0	0	0	0	0	0	0	0	0	0	0	8	0	5	0
638fdb9e8c3ea99a17304d85601943795daef555	#N/A	Metazoa	1	unclassified_Metazoa	0.79	unclassified_Metazoa	0.67	unclassified_Metazoa	0.61	unclassified_Metazoa	0.61	unclassified_Metazoa	0.06	unclassified_Metazoa_sp	0.06	0	0	0	0	0	0	0	0	0	0	0	0	0	0	0	0	0	0	0	0	0	0	0	0	0	0	0	0	0	0	2	0	0	0
68e6513f7d9316d6a02d3af456ba80f2971f20c4	#N/A	Metazoa	0.83	unclassified_Metazoa	0.2	unclassified_Metazoa	0.18	unclassified_Metazoa	0.07	unclassified_Metazoa	0.07	unclassified_Metazoa	0.06	unclassified_Metazoa_sp	0.06	0	0	0	0	0	0	0	0	0	0	0	0	0	0	0	0	0	0	0	0	0	0	0	0	0	0	0	0	0	0	0	2	0	0
6eea37b2f5a3a7726bb426e4cd007ecbee2bc653	#N/A	Metazoa	0.96	unclassified_Metazoa	0.68	unclassified_Metazoa	0.52	unclassified_Metazoa	0.07	unclassified_Metazoa	0.06	unclassified_Metazoa	0.06	unclassified_Metazoa_sp	0.06	0	0	0	0	0	0	0	4	0	0	0	0	0	0	0	0	0	0	0	0	0	0	0	0	0	0	0	0	0	0	0	0	0	0
750a38ba5d6aaa87befca8f154a8a7c6c40c936c	#N/A	Metazoa	0.85	unclassified_Metazoa	0.79	unclassified_Metazoa	0.57	unclassified_Metazoa	0.09	unclassified_Metazoa	0.06	unclassified_Metazoa	0.06	unclassified_Metazoa_sp	0.06	0	0	0	2	0	0	0	3	0	0	0	0	0	0	0	0	0	0	0	0	0	0	4	0	0	0	0	0	0	2	37	5	15	2
8321472ff090d956e7231641e4be387acb34b244	#N/A	Metazoa	0.83	unclassified_Metazoa	0.52	unclassified_Metazoa	0.39	unclassified_Metazoa	0.28	unclassified_Metazoa	0.08	unclassified_Metazoa	0.06	unclassified_Metazoa_sp	0.06	0	0	0	0	0	0	0	0	0	0	0	0	0	0	0	0	0	0	0	0	0	0	0	0	0	2	0	0	0	0	0	0	0	0
8535c83551ce9908b40fb56559e3c3f75c892a31	#N/A	Metazoa	0.87	unclassified_Metazoa	0.26	unclassified_Metazoa	0.15	unclassified_Metazoa	0.06	unclassified_Metazoa	0.06	unclassified_Metazoa	0.06	unclassified_Metazoa_sp	0.06	0	0	0	0	0	0	0	0	0	0	0	0	0	0	0	0	0	0	0	0	0	0	0	0	0	0	0	0	0	0	0	0	0	0
8ae2ba55d7ff9d8bf4105b516b69d316e6e98c8c	#N/A	Metazoa	0.8	unclassified_Metazoa	0.32	unclassified_Metazoa	0.24	unclassified_Metazoa	0.13	unclassified_Metazoa	0.09	unclassified_Metazoa	0.06	unclassified_Metazoa_sp	0.06	0	0	0	0	0	0	0	0	22	8	0	0	0	0	0	0	0	0	0	0	0	0	0	0	0	0	0	0	0	0	0	0	0	0
8f1a7c8460e10c9166b3f00ef2b437c1f21fef88	#N/A	Metazoa	0.92	unclassified_Metazoa	0.79	unclassified_Metazoa	0.23	unclassified_Metazoa	0.06	unclassified_Metazoa	0.06	unclassified_Metazoa	0.06	unclassified_Metazoa_sp	0.06	0	0	0	0	0	0	0	0	0	0	0	0	0	0	0	0	0	0	0	0	0	0	0	0	0	0	0	0	0	0	0	0	0	0
963e1882b8faf1fa15e6158614e816f4f1396535	#N/A	Metazoa	0.82	unclassified_Metazoa	0.06	unclassified_Metazoa	0.06	unclassified_Metazoa	0.06	unclassified_Metazoa	0.06	unclassified_Metazoa	0.06	unclassified_Metazoa_sp	0.06	0	0	0	0	0	0	0	0	0	0	0	0	0	0	0	0	0	0	261	179	364	0	0	0	0	0	0	0	0	0	0	0	0	0
9809b9f8cefb4cca755f0a519317e065e1385aa1	#N/A	Metazoa	0.87	unclassified_Metazoa	0.28	unclassified_Metazoa	0.18	unclassified_Metazoa	0.06	unclassified_Metazoa	0.06	unclassified_Metazoa	0.06	unclassified_Metazoa_sp	0.06	0	0	0	3	0	30	11	74	24	0	0	0	0	0	0	0	0	0	0	0	0	0	0	0	0	0	0	0	0	94	156	118	22	57
98a230efba300474e0da7ce3eb1a164815a06ae1	#N/A	Metazoa	0.89	unclassified_Metazoa	0.49	unclassified_Metazoa	0.49	unclassified_Metazoa	0.11	unclassified_Metazoa	0.11	unclassified_Metazoa	0.06	unclassified_Metazoa_sp	0.06	0	0	0	0	0	0	0	5	0	0	0	0	0	0	0	0	0	0	0	0	0	0	0	0	0	0	0	0	0	0	0	0	0	0
9f326556178e94d4adcb3dc73d31d485e6a2804c	#N/A	Metazoa	0.97	unclassified_Metazoa	0.09	unclassified_Metazoa	0.09	unclassified_Metazoa	0.06	unclassified_Metazoa	0.06	unclassified_Metazoa	0.06	unclassified_Metazoa_sp	0.06	0	0	0	0	0	0	0	0	0	0	0	0	0	0	0	0	0	0	0	0	0	0	0	0	0	0	0	0	0	0	0	0	0	0
9f9a8e6a60f75b021ac3b5e78f9c49031ee2340c	#N/A	Metazoa	1	unclassified_Metazoa	0.76	unclassified_Metazoa	0.48	unclassified_Metazoa	0.35	unclassified_Metazoa	0.15	unclassified_Metazoa	0.06	unclassified_Metazoa_sp	0.06	3	0	0	0	0	0	0	0	0	0	0	0	0	0	0	0	0	0	0	0	0	0	0	0	0	0	0	0	0	0	0	5	0	0
a143881e3ccbbae8d5a4512ddadb33c3c62ad524	#N/A	Metazoa	0.81	unclassified_Metazoa	0.08	unclassified_Metazoa	0.08	unclassified_Metazoa	0.06	unclassified_Metazoa	0.06	unclassified_Metazoa	0.06	unclassified_Metazoa_sp	0.06	0	0	0	0	0	0	0	0	0	0	0	0	0	0	0	0	0	0	0	0	0	0	0	0	4	0	0	0	0	0	0	0	0	0
ae66d6098584d73d77b3107344598d46ae384919	#N/A	Metazoa	0.91	unclassified_Metazoa	0.09	unclassified_Metazoa	0.09	unclassified_Metazoa	0.06	unclassified_Metazoa	0.06	unclassified_Metazoa	0.06	unclassified_Metazoa_sp	0.06	0	0	0	0	0	0	0	0	0	0	0	0	0	0	0	0	0	0	0	0	0	0	0	0	0	0	0	0	0	0	2	0	0	0
af1a77d161ce58dc3b9631221750a15bcc9c4cba	#N/A	Metazoa	0.8	unclassified_Metazoa	0.14	unclassified_Metazoa	0.13	unclassified_Metazoa	0.12	unclassified_Metazoa	0.06	unclassified_Metazoa	0.06	unclassified_Metazoa_sp	0.06	0	0	0	0	0	0	0	0	0	0	0	0	0	0	0	0	0	0	0	0	0	3	0	0	0	0	0	0	0	0	0	0	0	0
b44c37bee664017ddd031993973817d4ff13e402	#N/A	Metazoa	0.85	unclassified_Metazoa	0.58	unclassified_Metazoa	0.32	unclassified_Metazoa	0.09	unclassified_Metazoa	0.06	unclassified_Metazoa	0.06	unclassified_Metazoa_sp	0.06	0	0	0	0	0	0	0	0	0	0	0	0	0	0	0	0	0	0	0	0	0	0	0	3	0	0	0	0	0	0	0	0	0	0
b7dcd4a4fdfb6fa2a2d77c99aa084f220b8203b4	#N/A	Metazoa	1	unclassified_Metazoa	0.69	unclassified_Metazoa	0.11	unclassified_Metazoa	0.06	unclassified_Metazoa	0.06	unclassified_Metazoa	0.06	unclassified_Metazoa_sp	0.06	0	0	0	0	0	0	0	0	0	0	0	0	0	0	0	0	0	0	0	0	0	0	0	0	0	0	0	0	3	0	0	0	0	0
b8e8ce7f181f6fc2e33e17571771702a67a7b348	#N/A	Metazoa	0.88	unclassified_Metazoa	0.61	unclassified_Metazoa	0.38	unclassified_Metazoa	0.22	unclassified_Metazoa	0.12	unclassified_Metazoa	0.06	unclassified_Metazoa_sp	0.06	0	0	0	0	3	0	0	0	0	0	0	0	0	0	0	0	0	0	0	0	0	0	0	0	0	0	0	0	0	3	89	0	39	0
ba6e0963e90bad2bd8157c8663f6f521fc9d8ab5	#N/A	Metazoa	0.97	unclassified_Metazoa	0.61	unclassified_Metazoa	0.61	unclassified_Metazoa	0.46	unclassified_Metazoa	0.24	unclassified_Metazoa	0.06	unclassified_Metazoa_sp	0.06	0	0	0	0	0	0	0	0	0	0	0	0	0	0	0	0	0	0	0	0	0	0	0	0	0	0	0	0	0	0	0	0	0	0
d19aed898dd0a2369b10772b4fe7d71f64475fc1	#N/A	Metazoa	0.89	unclassified_Metazoa	0.53	unclassified_Metazoa	0.4	unclassified_Metazoa	0.19	unclassified_Metazoa	0.15	unclassified_Metazoa	0.06	unclassified_Metazoa_sp	0.06	0	0	0	0	0	0	0	0	0	0	0	0	0	0	0	2	0	0	6	0	0	0	0	0	0	0	0	0	0	0	7	0	0	0
d1b5833fd8e0bbcb80d07c227cae44a7ad840803	#N/A	Metazoa	0.82	unclassified_Metazoa	0.36	unclassified_Metazoa	0.31	unclassified_Metazoa	0.11	unclassified_Metazoa	0.06	unclassified_Metazoa	0.06	unclassified_Metazoa_sp	0.06	0	0	0	0	0	0	0	0	0	0	0	0	0	0	0	0	0	0	0	0	0	0	0	0	0	0	0	0	0	0	0	0	0	0
e54aa38f51f0ba2a2128cfe7606afb516e74523b	#N/A	Metazoa	0.84	unclassified_Metazoa	0.36	unclassified_Metazoa	0.23	unclassified_Metazoa	0.06	unclassified_Metazoa	0.06	unclassified_Metazoa	0.06	unclassified_Metazoa_sp	0.06	0	0	0	0	0	0	0	0	0	0	0	0	0	0	0	0	0	0	0	0	0	0	0	0	0	0	0	0	3	0	0	0	0	0
e819025de896824104bcb544fb274485c10a3f2f	#N/A	Metazoa	0.81	unclassified_Metazoa	0.51	unclassified_Metazoa	0.29	unclassified_Metazoa	0.2	unclassified_Metazoa	0.06	unclassified_Metazoa	0.06	unclassified_Metazoa_sp	0.06	0	8	0	0	0	4	0	0	0	0	0	0	0	0	0	0	0	0	0	3	3	0	0	0	0	0	0	0	0	5	14	0	0	0
208f3e14fe2992288dd2415645294030ad28d089	#N/A	Metazoa	0.81	unclassified_Metazoa	0.13	unclassified_Metazoa	0.13	unclassified_Metazoa	0.06	unclassified_Metazoa	0.06	unclassified_Metazoa	0.06	unclassified_Metazoa_sp	0.05	0	0	0	0	0	0	0	0	0	0	0	0	0	0	0	0	0	0	0	0	0	0	0	0	0	0	0	0	0	0	2	0	0	0
8704e8d45179e59b95b5fc60c5f35a7f47f2e2dc	#N/A	Metazoa	0.81	unclassified_Metazoa	0.5	unclassified_Metazoa	0.33	unclassified_Metazoa	0.06	unclassified_Metazoa	0.06	unclassified_Metazoa	0.06	unclassified_Metazoa_sp	0.05	0	0	0	0	0	0	0	0	0	0	0	0	0	0	0	0	0	0	0	0	0	0	0	0	0	0	0	2	0	0	0	0	0	0
a3956b403c24e716db8f66bd82a6c023a4c78743	#N/A	Metazoa	0.86	unclassified_Metazoa	0.61	unclassified_Metazoa	0.46	unclassified_Metazoa	0.15	unclassified_Metazoa	0.08	unclassified_Metazoa	0.06	unclassified_Metazoa_sp	0.05	0	0	0	0	0	0	0	0	0	0	0	0	0	0	0	0	0	0	0	0	0	0	0	0	0	0	0	0	0	0	5	0	0	0
03bb41f6889c99a67f380be4bb7de830a4a5cef9	#N/A	Metazoa	0.84	unclassified_Metazoa	0.59	unclassified_Metazoa	0.31	unclassified_Metazoa	0.07	unclassified_Metazoa	0.06	unclassified_Metazoa	0.06	unclassified_Metazoa_sp	0.04	0	0	0	86	0	0	0	0	0	0	0	0	0	0	0	0	0	0	0	0	0	0	0	0	0	0	0	0	0	0	0	0	0	0
aa8e6811a60aa7ca3717ed6cabb47a2c5854b22b	#N/A	Metazoa	0.91	unclassified_Metazoa	0.78	unclassified_Metazoa	0.59	unclassified_Metazoa	0.14	unclassified_Metazoa	0.07	unclassified_Metazoa	0.06	unclassified_Metazoa_sp	0.04	0	0	0	0	0	0	0	0	0	0	0	0	0	0	0	0	0	3	0	0	0	0	0	0	0	0	0	0	0	0	0	0	0	0
e78fd20ca4038cd061714feaf07735a1fa6c61fd	#N/A	Metazoa	0.85	unclassified_Metazoa	0.66	unclassified_Metazoa	0.52	unclassified_Metazoa	0.16	unclassified_Metazoa	0.07	unclassified_Metazoa	0.06	unclassified_Metazoa_sp	0.04	0	0	0	0	0	0	0	0	0	0	0	0	0	0	0	0	0	0	0	0	0	0	0	0	0	0	0	0	0	0	0	0	0	0
268366b83dc0da157b88c9717d56ed1ac03d3c71	#N/A	Metazoa	0.82	unclassified_Metazoa	0.47	unclassified_Metazoa	0.3	unclassified_Metazoa	0.07	unclassified_Metazoa	0.06	unclassified_Metazoa	0.06	unclassified_Metazoa_sp	0.03	0	0	0	0	0	0	0	0	0	0	0	0	0	0	0	0	0	0	0	0	0	0	0	0	2	0	0	0	0	0	0	0	0	0
269f9b3fb17c1f95f9aad58c5d9eb9d9118bcd18	#N/A	Metazoa	0.85	unclassified_Metazoa	0.63	unclassified_Metazoa	0.25	unclassified_Metazoa	0.2	unclassified_Metazoa	0.06	unclassified_Metazoa	0.06	unclassified_Metazoa_sp	0.02	0	0	0	0	0	0	0	0	0	0	0	0	0	0	0	0	0	0	0	0	0	0	0	0	0	0	0	0	0	0	0	3	0	0
1113a8bdbe53f71e4b6d3b0d1896a39b91001851	#N/A	Metazoa	0.88	unclassified_Metazoa	0.39	unclassified_Metazoa	0.28	unclassified_Metazoa	0.2	unclassified_Metazoa	0.05	unclassified_Metazoa	0.05	unclassified_Metazoa_sp	0.05	0	0	0	0	0	0	0	0	0	0	0	0	0	0	0	0	0	0	0	0	0	0	0	0	0	0	0	3	0	0	0	0	0	0
1b5679a987e1893b5b97f1bb9fec5b4365c966ed	#N/A	Metazoa	0.99	unclassified_Metazoa	0.75	unclassified_Metazoa	0.49	unclassified_Metazoa	0.18	unclassified_Metazoa	0.09	unclassified_Metazoa	0.05	unclassified_Metazoa_sp	0.05	0	0	0	0	0	0	0	0	0	0	0	0	0	2	0	0	0	0	0	0	0	0	0	0	0	0	0	0	0	0	0	0	0	0
24a20bea63ee8c108c81e39f66659f29bf3cc9db	#N/A	Metazoa	0.88	unclassified_Metazoa	0.65	unclassified_Metazoa	0.54	unclassified_Metazoa	0.1	unclassified_Metazoa	0.08	unclassified_Metazoa	0.05	unclassified_Metazoa_sp	0.05	0	0	0	0	0	0	0	0	0	0	0	0	0	0	0	0	0	0	0	0	0	0	0	0	0	0	0	0	0	0	0	0	0	0
27fa01ec1fae1f0ad584a620a9c77fda35becfc8	#N/A	Metazoa	0.85	unclassified_Metazoa	0.53	unclassified_Metazoa	0.21	unclassified_Metazoa	0.1	unclassified_Metazoa	0.05	unclassified_Metazoa	0.05	unclassified_Metazoa_sp	0.05	0	0	0	0	0	0	3	0	0	0	0	81	20	181	421	0	0	6	0	0	6	0	0	0	0	0	0	0	0	3	10	6	0	0
2c837d85bc2ad58f3c8d3febb38d20d5195ca491	#N/A	Metazoa	0.98	unclassified_Metazoa	0.69	unclassified_Metazoa	0.42	unclassified_Metazoa	0.12	unclassified_Metazoa	0.05	unclassified_Metazoa	0.05	unclassified_Metazoa_sp	0.05	0	0	0	0	0	0	0	0	0	0	0	0	0	0	0	0	0	11	0	0	0	0	0	0	0	0	0	0	0	0	0	0	0	0
2ed01ecf5478235dedebe45604da34705a35d098	#N/A	Metazoa	0.93	unclassified_Metazoa	0.76	unclassified_Metazoa	0.73	unclassified_Metazoa	0.24	unclassified_Metazoa	0.06	unclassified_Metazoa	0.05	unclassified_Metazoa_sp	0.05	0	0	0	0	0	0	0	0	0	0	0	0	0	0	0	0	0	0	0	0	0	0	0	0	0	0	0	0	0	0	0	0	2	0
32c9c9d56e3a1f21578dadd1f0f7b5476d209331	#N/A	Metazoa	0.98	unclassified_Metazoa	0.41	unclassified_Metazoa	0.13	unclassified_Metazoa	0.1	unclassified_Metazoa	0.05	unclassified_Metazoa	0.05	unclassified_Metazoa_sp	0.05	0	0	0	0	0	0	0	0	0	0	0	0	0	0	0	0	0	0	0	0	0	0	0	0	0	0	0	0	0	0	0	0	0	0
35e2447ecba56f7d59436fa9833d192cc9845d3e	#N/A	Metazoa	0.8	unclassified_Metazoa	0.07	unclassified_Metazoa	0.07	unclassified_Metazoa	0.05	unclassified_Metazoa	0.05	unclassified_Metazoa	0.05	unclassified_Metazoa_sp	0.05	0	0	0	0	0	0	0	0	0	0	0	0	0	0	0	0	0	0	0	0	0	0	0	0	0	0	0	0	0	12	0	0	0	0
3a0a8312af1e3a06550105ad79196cbdd11e5ea3	#N/A	Metazoa	0.89	unclassified_Metazoa	0.53	unclassified_Metazoa	0.11	unclassified_Metazoa	0.06	unclassified_Metazoa	0.05	unclassified_Metazoa	0.05	unclassified_Metazoa_sp	0.05	0	0	0	0	0	0	0	0	0	0	0	0	0	0	0	0	0	3	0	0	0	0	0	0	0	0	0	0	0	0	0	0	0	0
3ccb153315740880337165c52ce4af08e2ea7c51	#N/A	Metazoa	0.88	unclassified_Metazoa	0.11	unclassified_Metazoa	0.06	unclassified_Metazoa	0.05	unclassified_Metazoa	0.05	unclassified_Metazoa	0.05	unclassified_Metazoa_sp	0.05	0	0	0	0	0	0	0	0	0	0	0	0	0	0	0	0	0	2	0	0	0	0	0	0	0	0	0	0	0	0	0	0	0	0
3dbd9eee609f400c0958d4cfd54496df82850223	#N/A	Metazoa	0.86	unclassified_Metazoa	0.52	unclassified_Metazoa	0.24	unclassified_Metazoa	0.16	unclassified_Metazoa	0.08	unclassified_Metazoa	0.05	unclassified_Metazoa_sp	0.05	0	0	0	0	0	0	0	0	0	0	0	0	0	0	0	0	0	0	0	0	3	0	0	0	0	0	0	0	0	0	0	0	0	0
400f77330637e2926ee2d83e7441190169af073e	#N/A	Metazoa	0.99	unclassified_Metazoa	0.71	unclassified_Metazoa	0.24	unclassified_Metazoa	0.09	unclassified_Metazoa	0.05	unclassified_Metazoa	0.05	unclassified_Metazoa_sp	0.05	0	0	0	0	0	0	0	0	0	0	0	0	2	0	0	0	0	0	0	0	0	0	0	0	0	0	0	0	0	0	0	0	0	0
4020ec7d435ea6d5e13c420c4d27a7026f179cd5	#N/A	Metazoa	1	unclassified_Metazoa	0.71	unclassified_Metazoa	0.65	unclassified_Metazoa	0.13	unclassified_Metazoa	0.05	unclassified_Metazoa	0.05	unclassified_Metazoa_sp	0.05	0	0	0	0	0	0	0	0	0	0	0	0	0	0	0	0	0	0	0	0	0	177	0	0	0	0	0	0	0	10	0	3	0	0
402b62a27a78bc7f410c7c2b94d2cfe664ad48d1	#N/A	Metazoa	0.84	unclassified_Metazoa	0.17	unclassified_Metazoa	0.07	unclassified_Metazoa	0.07	unclassified_Metazoa	0.05	unclassified_Metazoa	0.05	unclassified_Metazoa_sp	0.05	0	0	0	0	0	0	0	0	0	0	0	0	0	0	0	0	0	0	0	0	0	0	0	0	0	0	0	0	0	0	0	0	0	0
495c3ec608442ea3df7259ec8569816cfbf706bd	#N/A	Metazoa	0.8	unclassified_Metazoa	0.44	unclassified_Metazoa	0.4	unclassified_Metazoa	0.13	unclassified_Metazoa	0.06	unclassified_Metazoa	0.05	unclassified_Metazoa_sp	0.05	0	0	0	0	0	0	0	0	0	0	0	0	0	0	0	0	0	0	0	0	0	0	0	0	0	0	0	0	0	0	0	0	0	0
4a3e948f0f8c522af1bcede4f6880e99468b386f	#N/A	Metazoa	0.83	unclassified_Metazoa	0.15	unclassified_Metazoa	0.06	unclassified_Metazoa	0.05	unclassified_Metazoa	0.05	unclassified_Metazoa	0.05	unclassified_Metazoa_sp	0.05	0	0	0	0	0	0	0	0	0	0	0	0	0	0	0	0	0	0	0	0	0	0	0	0	0	0	0	0	0	0	0	0	0	0
4bc9a496f61ba3141192b9e3c46fcb25661828e3	#N/A	Metazoa	0.81	unclassified_Metazoa	0.11	unclassified_Metazoa	0.09	unclassified_Metazoa	0.06	unclassified_Metazoa	0.06	unclassified_Metazoa	0.05	unclassified_Metazoa_sp	0.05	0	0	0	0	0	0	0	2	0	0	0	0	0	0	0	0	0	0	0	0	0	0	0	0	0	0	0	2	0	0	0	0	0	0
4eff08d1c06356cc6053a2828f43c2f3a28424df	#N/A	Metazoa	0.82	unclassified_Metazoa	0.05	unclassified_Metazoa	0.05	unclassified_Metazoa	0.05	unclassified_Metazoa	0.05	unclassified_Metazoa	0.05	unclassified_Metazoa_sp	0.05	0	0	0	0	0	0	0	0	0	0	0	0	0	0	0	0	0	0	0	0	0	0	0	0	0	0	0	0	0	4	0	0	0	0
4feea5907ccf3b152f4cafc16d8bad456d23400d	#N/A	Metazoa	0.86	unclassified_Metazoa	0.65	unclassified_Metazoa	0.52	unclassified_Metazoa	0.49	unclassified_Metazoa	0.12	unclassified_Metazoa	0.05	unclassified_Metazoa_sp	0.05	0	0	0	0	0	0	0	0	0	0	0	0	0	0	0	0	0	0	0	0	0	0	0	0	0	0	0	0	0	0	0	0	0	0
511e6298c393597d3007d51c98d1c9764a244bb1	#N/A	Metazoa	0.85	unclassified_Metazoa	0.44	unclassified_Metazoa	0.3	unclassified_Metazoa	0.19	unclassified_Metazoa	0.05	unclassified_Metazoa	0.05	unclassified_Metazoa_sp	0.05	0	0	0	0	0	0	0	0	0	0	0	0	0	0	0	0	0	0	0	0	0	0	0	0	0	0	0	0	0	0	0	0	0	0
58848f01cc75c21599b501e1e11a600c93df299b	#N/A	Metazoa	0.84	unclassified_Metazoa	0.44	unclassified_Metazoa	0.23	unclassified_Metazoa	0.2	unclassified_Metazoa	0.05	unclassified_Metazoa	0.05	unclassified_Metazoa_sp	0.05	0	0	0	0	0	0	0	0	0	5	0	0	0	0	0	0	0	0	0	0	0	0	0	0	0	0	0	0	0	0	0	0	0	0
6056ccbbb474083e7247689c97d0a84b66d99e00	#N/A	Metazoa	0.91	unclassified_Metazoa	0.12	unclassified_Metazoa	0.11	unclassified_Metazoa	0.05	unclassified_Metazoa	0.05	unclassified_Metazoa	0.05	unclassified_Metazoa_sp	0.05	0	0	0	0	0	0	0	0	0	0	0	0	0	0	0	0	0	0	0	0	0	42	0	0	0	0	0	0	0	0	0	0	0	0
67d8a271c3b3d12b1a83554589529a906427a166	#N/A	Metazoa	0.86	unclassified_Metazoa	0.54	unclassified_Metazoa	0.32	unclassified_Metazoa	0.08	unclassified_Metazoa	0.05	unclassified_Metazoa	0.05	unclassified_Metazoa_sp	0.05	0	0	0	0	0	0	0	0	0	0	0	0	0	0	0	0	0	0	0	0	0	0	0	0	0	0	0	0	0	0	0	0	0	0
6db838b99232f94b056d6eea2b9198b9582a3a88	#N/A	Metazoa	0.89	unclassified_Metazoa	0.72	unclassified_Metazoa	0.51	unclassified_Metazoa	0.17	unclassified_Metazoa	0.12	unclassified_Metazoa	0.05	unclassified_Metazoa_sp	0.05	0	0	0	0	0	0	0	0	0	0	0	0	0	0	0	2	0	0	0	0	0	0	0	0	0	0	0	0	0	0	0	0	0	0
6e689fd833c3f59d856143785cc740355fd4c285	#N/A	Metazoa	0.89	unclassified_Metazoa	0.72	unclassified_Metazoa	0.55	unclassified_Metazoa	0.17	unclassified_Metazoa	0.05	unclassified_Metazoa	0.05	unclassified_Metazoa_sp	0.05	0	0	0	0	0	0	0	0	0	0	0	0	0	0	0	0	0	0	0	0	0	0	0	0	0	0	0	0	0	0	0	0	0	0
86c9d25e46ed7e01dd69b4ea827086ecb5df28af	#N/A	Metazoa	0.84	unclassified_Metazoa	0.38	unclassified_Metazoa	0.26	unclassified_Metazoa	0.07	unclassified_Metazoa	0.05	unclassified_Metazoa	0.05	unclassified_Metazoa_sp	0.05	0	0	38	0	0	0	0	0	0	0	0	0	0	0	0	0	0	0	0	0	0	125	0	0	0	0	0	0	0	5	0	0	0	0
8fc25920d229151190aa0e0e93dbab66a893f0a6	#N/A	Metazoa	0.88	unclassified_Metazoa	0.4	unclassified_Metazoa	0.35	unclassified_Metazoa	0.07	unclassified_Metazoa	0.05	unclassified_Metazoa	0.05	unclassified_Metazoa_sp	0.05	0	0	0	0	0	0	0	0	0	0	0	0	0	0	0	0	0	0	0	0	0	0	0	0	0	0	0	9	0	0	0	0	0	0
9140e6d99a068d91fcc5a2a79705d503a7afca23	#N/A	Metazoa	0.83	unclassified_Metazoa	0.25	unclassified_Metazoa	0.21	unclassified_Metazoa	0.06	unclassified_Metazoa	0.05	unclassified_Metazoa	0.05	unclassified_Metazoa_sp	0.05	0	0	0	0	0	0	0	0	0	0	0	0	0	206	138	0	0	0	0	0	0	0	0	0	0	0	0	0	0	0	0	0	0	0
9e85695ab4765d6b5a2f18ecaa22940d91de60c4	#N/A	Metazoa	0.84	unclassified_Metazoa	0.11	unclassified_Metazoa	0.08	unclassified_Metazoa	0.05	unclassified_Metazoa	0.05	unclassified_Metazoa	0.05	unclassified_Metazoa_sp	0.05	0	0	0	0	0	0	0	0	0	0	0	0	0	0	0	0	0	0	0	0	0	0	0	0	0	0	0	0	0	0	0	0	40	0
a32992b52e1577f1cd76f0c589ed052fbbe76eaf	#N/A	Metazoa	0.82	unclassified_Metazoa	0.42	unclassified_Metazoa	0.13	unclassified_Metazoa	0.09	unclassified_Metazoa	0.05	unclassified_Metazoa	0.05	unclassified_Metazoa_sp	0.05	11	19	15	0	0	0	0	0	0	0	0	0	0	0	0	0	4	0	0	0	0	0	0	0	0	0	0	0	0	0	69	53	0	0
ab121ca4a97c63dfefcc651a014ceeac00a7ff54	#N/A	Metazoa	0.88	unclassified_Metazoa	0.37	unclassified_Metazoa	0.21	unclassified_Metazoa	0.06	unclassified_Metazoa	0.05	unclassified_Metazoa	0.05	unclassified_Metazoa_sp	0.05	0	0	0	0	0	0	0	0	0	0	0	0	0	0	0	0	0	0	0	0	0	0	0	0	0	0	0	0	0	0	55	0	0	0
add97797d35774ed9323659388e215bee55fc782	#N/A	Metazoa	0.83	unclassified_Metazoa	0.2	unclassified_Metazoa	0.2	unclassified_Metazoa	0.08	unclassified_Metazoa	0.08	unclassified_Metazoa	0.05	unclassified_Metazoa_sp	0.05	0	0	0	0	0	0	0	0	0	0	0	0	0	0	0	0	0	0	0	0	0	0	0	0	0	0	0	0	0	0	0	0	0	0
b87936abe33d098478733cc3670b1cd36dd96ea4	#N/A	Metazoa	0.84	unclassified_Metazoa	0.09	unclassified_Metazoa	0.09	unclassified_Metazoa	0.05	unclassified_Metazoa	0.05	unclassified_Metazoa	0.05	unclassified_Metazoa_sp	0.05	0	0	0	0	0	0	0	0	0	0	0	0	0	0	0	0	0	0	0	0	0	0	0	0	0	0	0	0	0	0	0	0	0	0
baaf69ac50ff1b01544302581867fe76fc24dd85	#N/A	Metazoa	0.99	unclassified_Metazoa	0.77	unclassified_Metazoa	0.29	unclassified_Metazoa	0.27	unclassified_Metazoa	0.18	unclassified_Metazoa	0.05	unclassified_Metazoa_sp	0.05	0	0	0	0	0	0	0	0	0	0	0	0	0	0	0	0	0	0	0	0	0	0	0	57	7	11	45	0	0	0	0	0	0	2
bc126f04ab47bea0c69915eaa7785a6e3dbbbb48	#N/A	Metazoa	0.97	unclassified_Metazoa	0.54	unclassified_Metazoa	0.18	unclassified_Metazoa	0.12	unclassified_Metazoa	0.05	unclassified_Metazoa	0.05	unclassified_Metazoa_sp	0.05	0	0	0	0	0	0	0	0	0	0	0	0	0	0	0	0	0	0	0	0	0	0	0	0	0	0	0	0	0	0	0	0	0	0
bc300442a0069bab76ecc166ccc3e7148a892462	#N/A	Metazoa	0.82	unclassified_Metazoa	0.69	unclassified_Metazoa	0.39	unclassified_Metazoa	0.06	unclassified_Metazoa	0.06	unclassified_Metazoa	0.05	unclassified_Metazoa_sp	0.05	0	3	0	0	0	0	0	0	0	0	0	0	0	0	0	0	0	0	3	0	0	0	0	0	0	0	0	0	0	0	2	4	0	8
c195440db4552afaa535cfde946dffe2009bb503	#N/A	Metazoa	0.8	unclassified_Metazoa	0.57	unclassified_Metazoa	0.35	unclassified_Metazoa	0.13	unclassified_Metazoa	0.07	unclassified_Metazoa	0.05	unclassified_Metazoa_sp	0.05	0	0	0	0	0	0	0	0	0	0	0	0	0	3	0	0	0	0	0	0	0	0	0	0	0	0	0	0	0	0	8	0	0	0
c3270851447fa1908cf997bd1a8b08e31a85fd5b	#N/A	Metazoa	0.91	unclassified_Metazoa	0.11	unclassified_Metazoa	0.07	unclassified_Metazoa	0.07	unclassified_Metazoa	0.05	unclassified_Metazoa	0.05	unclassified_Metazoa_sp	0.05	0	0	0	0	0	0	0	0	0	0	0	0	2	0	0	0	0	0	0	0	0	0	0	0	0	0	0	0	0	0	0	0	0	0
c57358ec3ac461e48d5c079712c5c6d342957cee	#N/A	Metazoa	0.82	unclassified_Metazoa	0.09	unclassified_Metazoa	0.09	unclassified_Metazoa	0.07	unclassified_Metazoa	0.05	unclassified_Metazoa	0.05	unclassified_Metazoa_sp	0.05	0	0	0	0	0	0	0	0	0	0	0	0	0	0	0	0	0	0	0	0	0	31	0	0	0	0	0	0	0	0	0	0	0	0
cb2b2988c91f785d43d85c8fa4ec75cf326abf37	#N/A	Metazoa	0.9	unclassified_Metazoa	0.14	unclassified_Metazoa	0.14	unclassified_Metazoa	0.08	unclassified_Metazoa	0.08	unclassified_Metazoa	0.05	unclassified_Metazoa_sp	0.05	0	0	0	0	0	0	0	0	0	0	0	0	0	0	0	0	2	0	0	0	0	0	0	0	0	0	0	0	0	0	0	0	0	0
cfac926c53965233cbf54a89ec9b1f642afd3048	#N/A	Metazoa	0.95	unclassified_Metazoa	0.59	unclassified_Metazoa	0.42	unclassified_Metazoa	0.28	unclassified_Metazoa	0.07	unclassified_Metazoa	0.05	unclassified_Metazoa_sp	0.05	0	0	0	0	0	0	0	0	0	0	0	0	0	0	0	0	0	0	0	0	0	0	0	0	0	0	0	0	0	11	0	0	0	0
cfec802d9270192bf5fac04781b2438a48c62453	#N/A	Metazoa	0.84	unclassified_Metazoa	0.07	unclassified_Metazoa	0.07	unclassified_Metazoa	0.07	unclassified_Metazoa	0.05	unclassified_Metazoa	0.05	unclassified_Metazoa_sp	0.05	0	11	10	0	20	0	0	0	0	0	0	0	0	0	0	0	0	0	14	35	0	0	16	0	0	0	0	0	0	0	0	12	0	12
d46ac487d401b3ef0331eeb672a4b6f63c3ced85	#N/A	Metazoa	0.82	unclassified_Metazoa	0.05	unclassified_Metazoa	0.05	unclassified_Metazoa	0.05	unclassified_Metazoa	0.05	unclassified_Metazoa	0.05	unclassified_Metazoa_sp	0.05	0	0	0	0	0	0	0	0	0	0	0	0	0	0	0	0	0	0	0	0	0	0	0	0	0	0	0	0	0	0	2	0	0	0
e460440d69d45c7bc46694792053f0f5c6fcb0a4	#N/A	Metazoa	0.81	unclassified_Metazoa	0.54	unclassified_Metazoa	0.33	unclassified_Metazoa	0.23	unclassified_Metazoa	0.06	unclassified_Metazoa	0.05	unclassified_Metazoa_sp	0.05	0	0	0	0	0	0	0	0	0	0	0	0	0	0	0	0	0	0	0	0	0	0	0	0	3	0	0	0	40	0	0	0	0	0
ecc0f3491c33a2d5a17c25ab3cead072f46b6d47	#N/A	Metazoa	0.85	unclassified_Metazoa	0.15	unclassified_Metazoa	0.15	unclassified_Metazoa	0.05	unclassified_Metazoa	0.05	unclassified_Metazoa	0.05	unclassified_Metazoa_sp	0.05	0	0	0	0	0	0	0	0	0	0	0	0	0	0	0	0	0	0	0	0	0	0	0	0	0	0	0	0	0	0	0	3	0	0
eec3728506f0053dd5613ef6f5083b6de9188521	#N/A	Metazoa	0.83	unclassified_Metazoa	0.24	unclassified_Metazoa	0.22	unclassified_Metazoa	0.06	unclassified_Metazoa	0.05	unclassified_Metazoa	0.05	unclassified_Metazoa_sp	0.05	0	0	0	0	0	0	0	0	0	0	0	0	0	0	0	0	0	0	0	0	0	0	0	0	0	0	0	0	0	0	14	0	0	0
f373f391d56e5768efca5e5e0c3ade029bf5938c	#N/A	Metazoa	0.81	unclassified_Metazoa	0.12	unclassified_Metazoa	0.05	unclassified_Metazoa	0.05	unclassified_Metazoa	0.05	unclassified_Metazoa	0.05	unclassified_Metazoa_sp	0.05	0	0	0	0	0	0	0	0	0	0	0	0	0	0	0	0	0	0	0	0	0	0	0	0	0	0	0	0	0	0	0	0	0	0
f58df26291b01bd303936218af06cbbe0574cccc	#N/A	Metazoa	0.87	unclassified_Metazoa	0.69	unclassified_Metazoa	0.57	unclassified_Metazoa	0.14	unclassified_Metazoa	0.06	unclassified_Metazoa	0.05	unclassified_Metazoa_sp	0.05	0	0	0	0	0	0	0	0	0	0	0	0	0	0	0	0	0	0	0	0	0	0	0	0	0	0	0	0	0	0	0	0	0	0
f89baa79adaf7643a2c539304c028b969bee59ba	#N/A	Metazoa	0.99	unclassified_Metazoa	0.57	unclassified_Metazoa	0.16	unclassified_Metazoa	0.09	unclassified_Metazoa	0.06	unclassified_Metazoa	0.05	unclassified_Metazoa_sp	0.05	0	0	0	0	0	0	0	0	0	0	0	0	0	7	0	0	0	0	0	0	0	0	0	0	0	0	0	0	0	0	0	0	0	0
f8f2a4bac544190846a4bb53e6b358c045cc33c7	#N/A	Metazoa	0.89	unclassified_Metazoa	0.1	unclassified_Metazoa	0.1	unclassified_Metazoa	0.07	unclassified_Metazoa	0.05	unclassified_Metazoa	0.05	unclassified_Metazoa_sp	0.05	0	0	0	0	0	0	0	0	0	0	0	0	0	0	0	0	0	0	0	0	0	0	0	0	0	0	0	0	0	0	0	0	49	0
fdae6724e7abd71d6b1871675d41a83b769fd518	#N/A	Metazoa	0.81	unclassified_Metazoa	0.62	unclassified_Metazoa	0.06	unclassified_Metazoa	0.06	unclassified_Metazoa	0.06	unclassified_Metazoa	0.05	unclassified_Metazoa_sp	0.05	0	0	0	0	0	0	0	0	0	0	0	0	0	0	0	0	0	0	0	0	0	0	0	0	0	0	0	0	0	0	0	0	0	0
0414c5ea54c603bb1173d2f0eeba0b94d96a7b79	#N/A	Metazoa	0.93	unclassified_Metazoa	0.17	unclassified_Metazoa	0.17	unclassified_Metazoa	0.17	unclassified_Metazoa	0.07	unclassified_Metazoa	0.05	unclassified_Metazoa_sp	0.04	0	0	0	2	0	0	0	0	0	0	0	0	0	0	0	0	0	0	0	0	0	0	0	0	0	0	0	0	0	0	0	0	0	0
7871faf2aff4914bf3de6e775b03853fade35092	#N/A	Metazoa	0.96	unclassified_Metazoa	0.08	unclassified_Metazoa	0.08	unclassified_Metazoa	0.08	unclassified_Metazoa	0.05	unclassified_Metazoa	0.05	unclassified_Metazoa_sp	0.04	0	0	0	0	0	0	3	0	0	0	0	0	0	0	0	0	0	0	0	0	0	0	0	0	0	0	0	0	0	0	0	0	0	0
c39027a8d751a33dca02f3ee664bef48e43182a4	#N/A	Metazoa	0.85	unclassified_Metazoa	0.72	unclassified_Metazoa	0.3	unclassified_Metazoa	0.12	unclassified_Metazoa	0.08	unclassified_Metazoa	0.05	unclassified_Metazoa_sp	0.04	0	0	0	0	0	0	0	0	0	0	0	0	0	0	0	0	0	0	0	0	0	0	0	0	2	0	0	0	0	0	0	0	0	0
cc048234f88ada4088d4461e0628951c1270aa89	#N/A	Metazoa	0.83	unclassified_Metazoa	0.49	unclassified_Metazoa	0.38	unclassified_Metazoa	0.06	unclassified_Metazoa	0.05	unclassified_Metazoa	0.05	unclassified_Metazoa_sp	0.04	0	0	0	0	0	3	0	0	0	0	0	0	0	0	0	7	0	0	0	0	0	0	0	0	0	0	0	0	0	7	137	0	3	0
095c7396b63915cbada6f7e3d0163ac4275de44a	#N/A	Metazoa	0.8	unclassified_Metazoa	0.47	unclassified_Metazoa	0.32	unclassified_Metazoa	0.17	unclassified_Metazoa	0.05	unclassified_Metazoa	0.05	unclassified_Metazoa_sp	0.03	0	0	0	0	0	0	0	6	0	0	0	0	42	0	0	0	0	0	0	0	0	0	0	0	0	0	0	0	0	0	0	0	0	0
ecf191aed9146b3bbb909e259f5c31a4d6eaf22e	#N/A	Metazoa	0.94	unclassified_Metazoa	0.49	unclassified_Metazoa	0.32	unclassified_Metazoa	0.11	unclassified_Metazoa	0.05	unclassified_Metazoa	0.05	unclassified_Metazoa_sp	0.03	0	0	0	0	0	0	0	0	0	0	0	0	0	0	0	0	0	0	0	0	0	0	0	0	0	0	0	0	0	0	0	0	0	0
3095318ee34898fcba585edfc6569b99c81f7ad9	#N/A	Metazoa	0.93	unclassified_Metazoa	0.79	unclassified_Metazoa	0.73	unclassified_Metazoa	0.3	unclassified_Metazoa	0.07	unclassified_Metazoa	0.05	unclassified_Metazoa_sp	0.02	0	0	0	0	0	0	0	0	0	0	0	0	0	0	0	0	0	0	0	0	0	0	0	0	0	0	0	0	0	0	0	0	0	0
b251e88dc655bdac2f3f51e8d84c6901058c46be	#N/A	Metazoa	1	unclassified_Metazoa	0.55	unclassified_Metazoa	0.44	unclassified_Metazoa	0.21	unclassified_Metazoa	0.21	unclassified_Metazoa	0.05	unclassified_Metazoa_sp	0.02	0	0	0	0	2	0	0	0	0	0	0	0	0	0	23	0	0	0	0	0	0	0	0	0	0	0	0	0	0	6	0	0	0	2
cdad99eb2247be27e831f74682b6606ed4fe5173	#N/A	Metazoa	0.87	unclassified_Metazoa	0.66	unclassified_Metazoa	0.52	unclassified_Metazoa	0.28	unclassified_Metazoa	0.14	unclassified_Metazoa	0.05	unclassified_Metazoa_sp	0.01	0	0	0	0	0	0	0	0	0	0	0	0	0	0	0	0	0	0	0	0	0	0	0	2	0	0	0	0	0	0	0	0	0	0
049bfa6398be77943f4e531fa8c18a3940e718f9	#N/A	Metazoa	0.97	unclassified_Metazoa	0.37	unclassified_Metazoa	0.06	unclassified_Metazoa	0.06	unclassified_Metazoa	0.05	unclassified_Metazoa	0.04	unclassified_Metazoa_sp	0.04	0	0	0	0	0	0	0	0	0	0	0	0	0	0	0	0	0	0	0	0	0	0	0	0	0	0	0	0	0	0	2	0	0	0
0507518ea55a60e8bc838488cf181b78ab505788	#N/A	Metazoa	0.88	unclassified_Metazoa	0.04	unclassified_Metazoa	0.04	unclassified_Metazoa	0.04	unclassified_Metazoa	0.04	unclassified_Metazoa	0.04	unclassified_Metazoa_sp	0.04	0	0	0	0	0	0	0	0	0	0	0	0	0	0	0	0	20	0	0	0	0	0	0	0	0	0	0	0	0	0	0	0	0	0
062df4ed47bcc2c2bfd90b898c1d361f82f1fb14	#N/A	Metazoa	0.84	unclassified_Metazoa	0.42	unclassified_Metazoa	0.24	unclassified_Metazoa	0.15	unclassified_Metazoa	0.04	unclassified_Metazoa	0.04	unclassified_Metazoa_sp	0.04	0	0	0	0	0	0	0	0	0	0	0	0	0	0	0	0	0	0	0	0	0	67	0	0	0	0	0	0	0	0	0	0	0	0
070b9e51c287b339191029576c61a2e15583204d	#N/A	Metazoa	0.88	unclassified_Metazoa	0.45	unclassified_Metazoa	0.3	unclassified_Metazoa	0.15	unclassified_Metazoa	0.05	unclassified_Metazoa	0.04	unclassified_Metazoa_sp	0.04	0	0	0	0	0	0	0	0	0	0	0	0	0	0	0	0	19	5	0	26	0	0	0	0	0	0	0	0	4	2	0	0	0	0
10774bc31cc9c6af6b127f1c257b4138971ee302	#N/A	Metazoa	0.88	unclassified_Metazoa	0.16	unclassified_Metazoa	0.05	unclassified_Metazoa	0.05	unclassified_Metazoa	0.05	unclassified_Metazoa	0.04	unclassified_Metazoa_sp	0.04	0	0	0	0	0	0	0	0	0	0	0	0	0	0	0	0	0	0	0	0	0	3	0	0	0	0	0	0	0	0	0	0	0	0
10ddd73536b53bafa3242f243a48e76272bdd22b	#N/A	Metazoa	0.83	unclassified_Metazoa	0.69	unclassified_Metazoa	0.61	unclassified_Metazoa	0.15	unclassified_Metazoa	0.04	unclassified_Metazoa	0.04	unclassified_Metazoa_sp	0.04	0	0	0	0	0	0	0	0	0	0	0	0	0	0	0	0	0	0	0	0	0	0	0	0	0	0	0	0	0	0	0	0	0	0
139cbf277cd622396a9975208e87098ed611a7db	#N/A	Metazoa	0.88	unclassified_Metazoa	0.51	unclassified_Metazoa	0.11	unclassified_Metazoa	0.06	unclassified_Metazoa	0.04	unclassified_Metazoa	0.04	unclassified_Metazoa_sp	0.04	0	0	0	0	0	0	0	0	0	0	0	0	0	0	0	0	0	0	0	0	0	0	0	0	0	0	0	0	0	0	3	0	0	0
1923339ec7c0382d4793b709820d43a0752ec513	#N/A	Metazoa	0.83	unclassified_Metazoa	0.04	unclassified_Metazoa	0.04	unclassified_Metazoa	0.04	unclassified_Metazoa	0.04	unclassified_Metazoa	0.04	unclassified_Metazoa_sp	0.04	0	0	0	0	0	0	0	0	0	0	0	0	0	11	0	7	0	0	0	0	0	4	0	0	0	0	0	0	0	0	0	0	2	0
20c268df0e90ef25df6e41adcb861e5c3e1ced51	#N/A	Metazoa	0.81	unclassified_Metazoa	0.15	unclassified_Metazoa	0.15	unclassified_Metazoa	0.08	unclassified_Metazoa	0.05	unclassified_Metazoa	0.04	unclassified_Metazoa_sp	0.04	0	0	0	0	0	0	0	0	0	0	0	0	0	0	0	0	0	0	0	0	0	0	0	0	0	0	0	0	0	0	4	0	0	0
2136102ad7c7a72f594246ce80d9d79bbc9914a1	#N/A	Metazoa	0.82	unclassified_Metazoa	0.23	unclassified_Metazoa	0.23	unclassified_Metazoa	0.11	unclassified_Metazoa	0.04	unclassified_Metazoa	0.04	unclassified_Metazoa_sp	0.04	0	0	0	0	0	0	0	0	0	0	0	0	0	0	0	0	0	0	0	0	0	3	0	0	0	0	0	0	0	0	0	3	0	0
22d01c0eedc0bbb8e4e62797132a55e147e3cfe1	#N/A	Metazoa	1	unclassified_Metazoa	0.76	unclassified_Metazoa	0.14	unclassified_Metazoa	0.06	unclassified_Metazoa	0.04	unclassified_Metazoa	0.04	unclassified_Metazoa_sp	0.04	0	0	0	17	0	7	5	33	0	0	0	3	0	0	0	7	0	7	0	0	0	0	0	0	0	0	0	0	0	14	0	387	165	335
248127479b18019a130d927afe0a43264454f7a2	#N/A	Metazoa	0.89	unclassified_Metazoa	0.22	unclassified_Metazoa	0.07	unclassified_Metazoa	0.07	unclassified_Metazoa	0.04	unclassified_Metazoa	0.04	unclassified_Metazoa_sp	0.04	0	0	0	0	0	0	0	0	0	0	0	0	0	0	0	0	0	0	0	0	0	0	0	0	0	0	0	0	0	0	0	0	0	0
248b2533917900f5d4f4ae81e5306b1a22db9db2	#N/A	Metazoa	0.81	unclassified_Metazoa	0.66	unclassified_Metazoa	0.48	unclassified_Metazoa	0.21	unclassified_Metazoa	0.04	unclassified_Metazoa	0.04	unclassified_Metazoa_sp	0.04	0	0	0	0	0	0	0	0	0	0	0	0	0	0	0	0	0	0	0	0	0	0	0	0	0	0	0	0	0	0	0	0	0	0
2b45ea45747ead00691dd55dc95734076df2aa25	#N/A	Metazoa	0.86	unclassified_Metazoa	0.34	unclassified_Metazoa	0.14	unclassified_Metazoa	0.09	unclassified_Metazoa	0.06	unclassified_Metazoa	0.04	unclassified_Metazoa_sp	0.04	0	0	0	0	0	0	0	0	0	0	0	0	0	0	0	0	0	0	0	0	0	0	0	0	0	0	0	0	0	0	0	0	17	0
334b1434d1c12f5e23da9248117c06737295e8de	#N/A	Metazoa	0.84	unclassified_Metazoa	0.1	unclassified_Metazoa	0.1	unclassified_Metazoa	0.05	unclassified_Metazoa	0.04	unclassified_Metazoa	0.04	unclassified_Metazoa_sp	0.04	0	0	0	0	0	0	0	0	0	0	0	0	0	0	0	0	0	0	0	0	0	0	0	0	0	0	0	0	4	0	0	0	0	0
354aa7d0797789c8528d4340d0feb907550d6156	#N/A	Metazoa	0.96	unclassified_Metazoa	0.21	unclassified_Metazoa	0.11	unclassified_Metazoa	0.11	unclassified_Metazoa	0.04	unclassified_Metazoa	0.04	unclassified_Metazoa_sp	0.04	0	0	0	0	0	0	0	0	0	0	0	0	0	0	0	0	0	0	0	0	0	0	0	0	0	0	0	0	0	0	0	0	0	0
36c0112040183c5e27caad6f8028c56b72078ca3	#N/A	Metazoa	0.9	unclassified_Metazoa	0.05	unclassified_Metazoa	0.05	unclassified_Metazoa	0.04	unclassified_Metazoa	0.04	unclassified_Metazoa	0.04	unclassified_Metazoa_sp	0.04	0	0	0	0	0	0	0	0	0	0	0	0	0	0	0	0	0	0	0	0	0	0	0	0	0	0	0	0	0	0	0	0	0	0
3ebc32d5cceb1fdaf7c7f6520687b0d8a903a9d9	#N/A	Metazoa	0.91	unclassified_Metazoa	0.76	unclassified_Metazoa	0.65	unclassified_Metazoa	0.16	unclassified_Metazoa	0.05	unclassified_Metazoa	0.04	unclassified_Metazoa_sp	0.04	0	0	0	0	0	0	0	0	0	0	0	0	0	0	0	0	0	0	0	0	0	0	0	0	0	0	0	0	0	0	3	0	0	0
40d675f75db28af6d699c0e600192a46921794b5	#N/A	Metazoa	0.82	unclassified_Metazoa	0.55	unclassified_Metazoa	0.26	unclassified_Metazoa	0.08	unclassified_Metazoa	0.04	unclassified_Metazoa	0.04	unclassified_Metazoa_sp	0.04	0	0	2	0	0	0	0	0	0	0	0	15	0	0	0	0	0	0	0	0	0	19	4	0	0	0	0	0	0	0	0	0	0	0
46c983988927c4049e93d2db0615e1830cedfbe1	#N/A	Metazoa	0.83	unclassified_Metazoa	0.3	unclassified_Metazoa	0.08	unclassified_Metazoa	0.04	unclassified_Metazoa	0.04	unclassified_Metazoa	0.04	unclassified_Metazoa_sp	0.04	0	0	0	0	0	0	0	0	0	0	0	0	0	0	0	0	0	0	0	0	0	0	0	0	0	0	0	0	0	0	0	0	0	0
48498f38053d857618997838158b439306efabb1	#N/A	Metazoa	0.84	unclassified_Metazoa	0.24	unclassified_Metazoa	0.23	unclassified_Metazoa	0.1	unclassified_Metazoa	0.04	unclassified_Metazoa	0.04	unclassified_Metazoa_sp	0.04	0	0	0	0	0	0	0	0	0	0	0	0	0	0	0	0	3	0	0	0	0	4	22	0	0	0	0	0	0	0	0	0	0	0
4855a987410531debda1d3b8d156a0f42da4cb07	#N/A	Metazoa	0.89	unclassified_Metazoa	0.78	unclassified_Metazoa	0.33	unclassified_Metazoa	0.26	unclassified_Metazoa	0.09	unclassified_Metazoa	0.04	unclassified_Metazoa_sp	0.04	0	0	0	0	0	0	0	0	0	0	0	0	0	0	0	0	0	0	0	0	0	0	0	0	0	0	0	0	0	0	2	0	0	0
4ba5ed0d0141a556e20854a49864937e881e4b42	#N/A	Metazoa	0.88	unclassified_Metazoa	0.53	unclassified_Metazoa	0.31	unclassified_Metazoa	0.26	unclassified_Metazoa	0.05	unclassified_Metazoa	0.04	unclassified_Metazoa_sp	0.04	0	0	0	0	0	0	0	0	0	0	0	0	0	0	0	0	0	0	0	0	0	5	0	0	0	0	0	0	0	4	0	0	4	0
50c8f07780f34f7c6eeb137646e1ecd79bb1cbd4	#N/A	Metazoa	0.98	unclassified_Metazoa	0.72	unclassified_Metazoa	0.15	unclassified_Metazoa	0.08	unclassified_Metazoa	0.04	unclassified_Metazoa	0.04	unclassified_Metazoa_sp	0.04	0	0	0	0	0	0	0	0	0	0	0	0	0	0	0	0	0	0	0	0	0	0	0	0	0	0	0	0	0	0	2	0	0	0
548d14298b6a59ba0e98342f4bab9ab7820b3af5	#N/A	Metazoa	0.81	unclassified_Metazoa	0.09	unclassified_Metazoa	0.07	unclassified_Metazoa	0.06	unclassified_Metazoa	0.04	unclassified_Metazoa	0.04	unclassified_Metazoa_sp	0.04	0	0	0	0	0	0	0	0	0	0	0	0	0	0	0	0	0	0	0	0	0	0	0	0	0	0	0	0	0	2	0	0	0	0
565d4d77716446e188336e166ae3b66ad0697d02	#N/A	Metazoa	0.96	unclassified_Metazoa	0.75	unclassified_Metazoa	0.57	unclassified_Metazoa	0.09	unclassified_Metazoa	0.04	unclassified_Metazoa	0.04	unclassified_Metazoa_sp	0.04	0	0	0	0	0	0	0	0	0	0	0	0	0	0	0	0	0	0	0	0	0	0	0	0	0	0	0	0	0	21	0	0	0	0
602c69d4840b2e2ecc801a7662cbacb979aface3	#N/A	Metazoa	0.84	unclassified_Metazoa	0.04	unclassified_Metazoa	0.04	unclassified_Metazoa	0.04	unclassified_Metazoa	0.04	unclassified_Metazoa	0.04	unclassified_Metazoa_sp	0.04	0	0	0	0	0	0	0	0	0	0	0	0	0	0	0	0	0	0	0	0	0	0	0	0	0	0	0	0	0	0	0	0	0	0
63474106f93c4e6e8a4e90da962d40d0f042b36e	#N/A	Metazoa	0.86	unclassified_Metazoa	0.28	unclassified_Metazoa	0.16	unclassified_Metazoa	0.04	unclassified_Metazoa	0.04	unclassified_Metazoa	0.04	unclassified_Metazoa_sp	0.04	0	0	0	0	0	0	0	0	0	0	0	0	0	0	0	0	0	0	0	0	0	0	0	0	0	0	0	0	0	0	0	0	0	0
647d45803a947aff1f78e98e0f2b0cc715577141	#N/A	Metazoa	0.81	unclassified_Metazoa	0.2	unclassified_Metazoa	0.14	unclassified_Metazoa	0.04	unclassified_Metazoa	0.04	unclassified_Metazoa	0.04	unclassified_Metazoa_sp	0.04	0	0	0	0	0	0	0	0	0	0	0	0	0	0	0	0	0	0	0	0	0	0	2	0	0	0	0	0	0	0	0	0	0	0
6587610031307d8fa9035948234aa0df2855b787	#N/A	Metazoa	0.83	unclassified_Metazoa	0.66	unclassified_Metazoa	0.56	unclassified_Metazoa	0.13	unclassified_Metazoa	0.07	unclassified_Metazoa	0.04	unclassified_Metazoa_sp	0.04	0	2	0	0	0	0	0	6	0	0	0	0	0	0	0	0	0	0	0	0	0	0	0	0	0	0	0	0	0	3	0	9	4	0
755f2396b591832ed2bae9e0d3575fbe9c7b8f64	#N/A	Metazoa	0.82	unclassified_Metazoa	0.27	unclassified_Metazoa	0.17	unclassified_Metazoa	0.06	unclassified_Metazoa	0.04	unclassified_Metazoa	0.04	unclassified_Metazoa_sp	0.04	0	0	0	0	0	0	0	0	0	0	0	0	0	0	0	0	0	0	0	0	0	0	0	0	0	0	0	0	0	0	0	0	14	0
77fafdcfaf71a486646fb4a6a5e2fdfcb43c58a3	#N/A	Metazoa	0.92	unclassified_Metazoa	0.6	unclassified_Metazoa	0.32	unclassified_Metazoa	0.19	unclassified_Metazoa	0.05	unclassified_Metazoa	0.04	unclassified_Metazoa_sp	0.04	0	0	0	0	0	0	2	0	0	0	0	0	0	0	2	0	0	0	0	0	0	0	0	0	0	0	0	0	0	0	0	0	0	0
7d047820813b1e39a3faa9998a3b56cc121df530	#N/A	Metazoa	0.94	unclassified_Metazoa	0.53	unclassified_Metazoa	0.38	unclassified_Metazoa	0.07	unclassified_Metazoa	0.04	unclassified_Metazoa	0.04	unclassified_Metazoa_sp	0.04	0	0	0	0	0	0	0	0	0	0	0	0	0	0	0	0	0	0	0	0	0	0	0	0	0	0	0	0	0	0	0	0	0	0
7d55226a3a375acb2fc613816f054e86f5478928	#N/A	Metazoa	0.84	unclassified_Metazoa	0.56	unclassified_Metazoa	0.42	unclassified_Metazoa	0.24	unclassified_Metazoa	0.05	unclassified_Metazoa	0.04	unclassified_Metazoa_sp	0.04	0	0	0	5	0	0	0	4	0	0	0	0	3	0	0	0	0	0	0	0	0	0	3	4	0	20	0	0	3	0	0	8	0	0
8270a76d684a9a6e0b5b1075bae6f729c9e369fb	#N/A	Metazoa	0.98	unclassified_Metazoa	0.19	unclassified_Metazoa	0.07	unclassified_Metazoa	0.05	unclassified_Metazoa	0.04	unclassified_Metazoa	0.04	unclassified_Metazoa_sp	0.04	0	0	0	0	0	0	0	0	0	0	0	0	0	0	0	0	0	0	0	0	0	4	0	0	0	0	0	0	0	0	0	0	0	0
896df985ee4185148fe51c286a51f9083a74a3ac	#N/A	Metazoa	1	unclassified_Metazoa	0.58	unclassified_Metazoa	0.38	unclassified_Metazoa	0.22	unclassified_Metazoa	0.04	unclassified_Metazoa	0.04	unclassified_Metazoa_sp	0.04	0	0	0	0	0	0	0	0	0	0	0	0	0	0	0	0	0	0	0	0	0	0	0	0	0	0	0	0	0	0	0	3	0	0
8cd8d55205dc8bf3dafa6d4249970d5791b04db8	#N/A	Metazoa	0.96	unclassified_Metazoa	0.04	unclassified_Metazoa	0.04	unclassified_Metazoa	0.04	unclassified_Metazoa	0.04	unclassified_Metazoa	0.04	unclassified_Metazoa_sp	0.04	0	53	0	0	0	0	0	0	0	0	0	0	0	0	0	0	0	0	0	0	0	0	0	0	0	0	0	0	0	0	0	0	0	0
8d081b769b3b158343eeac88aa15a4035fb25397	#N/A	Metazoa	0.81	unclassified_Metazoa	0.2	unclassified_Metazoa	0.18	unclassified_Metazoa	0.05	unclassified_Metazoa	0.04	unclassified_Metazoa	0.04	unclassified_Metazoa_sp	0.04	0	0	0	0	0	0	0	0	0	0	0	0	0	0	0	0	0	0	0	0	0	0	0	0	0	0	0	0	0	2	0	0	0	0
8f4a81bce80f7f1ccc305312168a02a9d1cb2a8f	#N/A	Metazoa	1	unclassified_Metazoa	0.79	unclassified_Metazoa	0.13	unclassified_Metazoa	0.07	unclassified_Metazoa	0.04	unclassified_Metazoa	0.04	unclassified_Metazoa_sp	0.04	0	0	0	0	0	0	0	0	0	0	0	0	0	0	0	0	0	0	0	0	0	0	0	0	0	0	0	0	0	0	0	0	0	0
926138858a992f0723715b617b15f05d31c97ef6	#N/A	Metazoa	0.86	unclassified_Metazoa	0.74	unclassified_Metazoa	0.55	unclassified_Metazoa	0.14	unclassified_Metazoa	0.04	unclassified_Metazoa	0.04	unclassified_Metazoa_sp	0.04	0	0	0	0	0	0	0	0	0	0	0	0	0	0	2	0	0	0	0	0	0	0	0	0	0	0	0	0	0	0	0	0	0	0
93fab47c4f2b9d5fc0feaf51963f1ebfc2716006	#N/A	Metazoa	0.99	unclassified_Metazoa	0.09	unclassified_Metazoa	0.06	unclassified_Metazoa	0.06	unclassified_Metazoa	0.05	unclassified_Metazoa	0.04	unclassified_Metazoa_sp	0.04	0	0	0	0	0	0	0	3	0	0	0	0	0	0	0	0	0	43	0	0	0	0	0	0	0	0	0	0	0	0	0	0	0	0
b4e1bca68e535bed82c6bc1e73adbb1d6c6027d9	#N/A	Metazoa	0.92	unclassified_Metazoa	0.56	unclassified_Metazoa	0.38	unclassified_Metazoa	0.07	unclassified_Metazoa	0.04	unclassified_Metazoa	0.04	unclassified_Metazoa_sp	0.04	0	0	0	0	0	0	0	0	0	0	0	0	0	0	0	0	0	0	0	0	0	0	0	0	0	0	0	3	0	0	0	0	0	0
ba24a66b990bc5b9ba3beca890ebae0f0e50bad0	#N/A	Metazoa	0.91	unclassified_Metazoa	0.46	unclassified_Metazoa	0.14	unclassified_Metazoa	0.07	unclassified_Metazoa	0.04	unclassified_Metazoa	0.04	unclassified_Metazoa_sp	0.04	0	0	0	0	0	0	0	0	0	0	0	0	0	0	0	0	0	0	0	0	0	0	0	0	0	0	0	0	0	2	0	0	0	0
c1b41c5c0664abaf2785d36972b8ba81790a0990	#N/A	Metazoa	0.98	unclassified_Metazoa	0.76	unclassified_Metazoa	0.15	unclassified_Metazoa	0.11	unclassified_Metazoa	0.04	unclassified_Metazoa	0.04	unclassified_Metazoa_sp	0.04	0	0	0	0	0	0	0	0	0	0	0	0	1300	313	0	2075	1891	0	0	1234	0	0	0	0	0	0	0	0	0	0	0	0	0	0
c4fff11a469e9a51a192d783048f464dcf80df6e	#N/A	Metazoa	0.82	unclassified_Metazoa	0.04	unclassified_Metazoa	0.04	unclassified_Metazoa	0.04	unclassified_Metazoa	0.04	unclassified_Metazoa	0.04	unclassified_Metazoa_sp	0.04	0	0	0	0	0	0	0	0	0	0	0	0	0	0	0	0	0	2	0	0	0	0	0	0	0	0	0	0	0	0	0	0	0	0
c8eb2798ce470b96e901eac7c539b9f31d27de7a	#N/A	Metazoa	0.91	unclassified_Metazoa	0.79	unclassified_Metazoa	0.66	unclassified_Metazoa	0.24	unclassified_Metazoa	0.07	unclassified_Metazoa	0.04	unclassified_Metazoa_sp	0.04	0	0	0	0	0	0	0	0	0	0	0	0	0	0	0	0	0	0	0	0	0	0	0	0	0	0	0	0	0	0	0	0	0	0
dc0d5194a094537c59e0d6078801d9093ecafc17	#N/A	Metazoa	0.86	unclassified_Metazoa	0.1	unclassified_Metazoa	0.1	unclassified_Metazoa	0.05	unclassified_Metazoa	0.05	unclassified_Metazoa	0.04	unclassified_Metazoa_sp	0.04	0	0	0	0	0	0	0	0	0	0	0	0	0	0	0	0	0	7	0	10	0	0	0	0	0	0	0	0	0	0	0	0	0	0
e17b9ae5b2f244e7bfa179c5b7c527ac83c499dd	#N/A	Metazoa	1	unclassified_Metazoa	0.32	unclassified_Metazoa	0.08	unclassified_Metazoa	0.06	unclassified_Metazoa	0.04	unclassified_Metazoa	0.04	unclassified_Metazoa_sp	0.04	0	2	0	0	0	0	0	0	0	0	0	0	0	0	0	0	0	0	0	0	0	0	0	0	0	0	0	0	0	0	0	0	0	0
e3545986d732d91bd41c008555064dcb838e827b	#N/A	Metazoa	0.83	unclassified_Metazoa	0.27	unclassified_Metazoa	0.19	unclassified_Metazoa	0.06	unclassified_Metazoa	0.04	unclassified_Metazoa	0.04	unclassified_Metazoa_sp	0.04	0	0	0	0	0	0	0	0	0	0	0	0	0	0	0	0	0	0	0	0	0	0	0	0	0	0	0	0	4	0	0	0	0	0
e3f0e4d1bb7b4cb5758b3cff1f0b153126da0243	#N/A	Metazoa	0.87	unclassified_Metazoa	0.41	unclassified_Metazoa	0.21	unclassified_Metazoa	0.04	unclassified_Metazoa	0.04	unclassified_Metazoa	0.04	unclassified_Metazoa_sp	0.04	0	0	0	0	0	0	0	0	0	0	0	0	0	0	0	0	0	0	0	15	0	0	0	0	0	0	0	0	0	0	0	0	0	0
e4b4adb10c7f9da3c502ba1511fe100a71991211	#N/A	Metazoa	0.85	unclassified_Metazoa	0.64	unclassified_Metazoa	0.54	unclassified_Metazoa	0.12	unclassified_Metazoa	0.04	unclassified_Metazoa	0.04	unclassified_Metazoa_sp	0.04	0	0	0	0	0	0	0	0	0	0	0	0	0	0	0	0	0	0	0	0	0	0	0	0	0	0	0	0	0	0	0	0	56	0
f2eff7f7ced8ddb9f0c7c026434a8e3fac12575f	#N/A	Metazoa	0.84	unclassified_Metazoa	0.5	unclassified_Metazoa	0.43	unclassified_Metazoa	0.2	unclassified_Metazoa	0.04	unclassified_Metazoa	0.04	unclassified_Metazoa_sp	0.04	0	0	0	0	0	0	0	0	0	0	0	0	0	0	0	0	0	0	0	0	0	0	0	0	0	0	0	0	0	0	0	0	0	0
f3a38a8b0672ec7cd61262e58d832e916a451987	#N/A	Metazoa	0.88	unclassified_Metazoa	0.59	unclassified_Metazoa	0.35	unclassified_Metazoa	0.1	unclassified_Metazoa	0.08	unclassified_Metazoa	0.04	unclassified_Metazoa_sp	0.04	0	2	0	0	0	0	0	0	0	0	0	0	0	0	0	0	0	0	0	0	0	0	0	0	0	0	0	0	0	0	0	0	0	0
fc8413c5060c913ccf9f67f1048e8cdbde655b7d	#N/A	Metazoa	0.97	unclassified_Metazoa	0.75	unclassified_Metazoa	0.45	unclassified_Metazoa	0.2	unclassified_Metazoa	0.04	unclassified_Metazoa	0.04	unclassified_Metazoa_sp	0.04	0	0	0	0	0	0	0	0	0	0	0	0	0	0	0	0	205	0	0	0	0	0	0	0	0	0	0	0	0	2	0	0	0	0
28a1841f4fd3df85759275fe0312b6e3e602e16d	#N/A	Metazoa	0.86	unclassified_Metazoa	0.69	unclassified_Metazoa	0.57	unclassified_Metazoa	0.16	unclassified_Metazoa	0.04	unclassified_Metazoa	0.04	unclassified_Metazoa_sp	0.03	0	0	0	0	0	0	0	0	0	0	0	0	0	0	0	0	0	0	0	0	0	0	0	0	0	0	0	0	0	0	0	0	0	0
4337a491a8819e7a432e449633c5fffc47733570	#N/A	Metazoa	1	unclassified_Metazoa	0.48	unclassified_Metazoa	0.15	unclassified_Metazoa	0.06	unclassified_Metazoa	0.05	unclassified_Metazoa	0.04	unclassified_Metazoa_sp	0.03	0	0	0	0	0	0	0	0	0	0	0	0	0	0	0	0	0	0	0	0	0	0	0	0	0	0	0	0	0	3	0	0	0	0
8fb4b44921a919b3cc46a0d7d82213416bdc322b	#N/A	Metazoa	1	unclassified_Metazoa	0.76	unclassified_Metazoa	0.66	unclassified_Metazoa	0.34	unclassified_Metazoa	0.13	unclassified_Metazoa	0.04	unclassified_Metazoa_sp	0.03	0	0	0	0	0	5	0	0	0	0	0	0	0	0	0	0	0	0	0	0	0	0	0	0	0	0	0	0	0	0	0	0	0	0
90f8ce23fe6ccbf63f7ee111e03b8e076df52dd7	#N/A	Metazoa	0.93	unclassified_Metazoa	0.78	unclassified_Metazoa	0.36	unclassified_Metazoa	0.28	unclassified_Metazoa	0.07	unclassified_Metazoa	0.04	unclassified_Metazoa_sp	0.03	0	0	0	0	3	0	0	0	0	0	0	0	0	0	0	0	0	0	0	0	3	0	0	0	0	0	0	0	0	0	0	0	0	0
bc2ab22e4b0596b3e01450b0b894cec8b207a0a2	#N/A	Metazoa	0.96	unclassified_Metazoa	0.77	unclassified_Metazoa	0.56	unclassified_Metazoa	0.2	unclassified_Metazoa	0.05	unclassified_Metazoa	0.04	unclassified_Metazoa_sp	0.03	0	0	0	0	0	0	0	0	0	6	0	0	0	0	0	0	0	0	0	0	0	0	0	0	0	0	0	0	0	0	0	0	0	19
ce94c32a49f3c0281f9d30c56433fdf54a679157	#N/A	Metazoa	0.83	unclassified_Metazoa	0.55	unclassified_Metazoa	0.46	unclassified_Metazoa	0.08	unclassified_Metazoa	0.04	unclassified_Metazoa	0.04	unclassified_Metazoa_sp	0.03	0	0	0	0	0	0	0	0	0	0	0	0	0	0	0	0	0	0	0	0	0	0	0	0	0	0	0	0	0	0	2	0	0	0
dc2d31eb7c25de5757a87380c80621f54f81719c	#N/A	Metazoa	1	unclassified_Metazoa	0.74	unclassified_Metazoa	0.71	unclassified_Metazoa	0.48	unclassified_Metazoa	0.48	unclassified_Metazoa	0.04	unclassified_Metazoa_sp	0.03	0	0	3	0	0	0	0	0	0	0	0	0	0	0	0	0	0	0	0	0	0	0	0	0	0	0	0	0	0	0	0	0	0	0
dd1c4a804741a09bf19b338952ddf8d917525268	#N/A	Metazoa	0.84	unclassified_Metazoa	0.7	unclassified_Metazoa	0.43	unclassified_Metazoa	0.21	unclassified_Metazoa	0.05	unclassified_Metazoa	0.04	unclassified_Metazoa_sp	0.03	15	0	7	12	0	0	0	0	4	0	0	9	24	17	0	4	0	0	15	31	53	48	48	0	0	0	3	0	0	0	9	0	12	0
ff499258e3a61b0b88ad1226ba4525a03164845d	#N/A	Metazoa	0.99	unclassified_Metazoa	0.77	unclassified_Metazoa	0.12	unclassified_Metazoa	0.08	unclassified_Metazoa	0.04	unclassified_Metazoa	0.04	unclassified_Metazoa_sp	0.03	0	0	0	0	0	0	0	0	0	0	0	0	0	0	0	0	0	0	0	0	0	0	0	0	0	0	0	0	0	0	0	0	0	0
113fe8432a057d65da5a2a2e1417b0c1ec859427	#N/A	Metazoa	0.89	unclassified_Metazoa	0.77	unclassified_Metazoa	0.66	unclassified_Metazoa	0.12	unclassified_Metazoa	0.05	unclassified_Metazoa	0.04	unclassified_Metazoa_sp	0.02	0	0	0	0	0	0	0	0	0	0	9	0	0	0	0	0	9	0	0	0	0	0	0	0	0	0	0	0	0	0	0	18	13	6
36827433cfdd9e74a373dcc745364ff2dab1a233	#N/A	Metazoa	0.87	unclassified_Metazoa	0.65	unclassified_Metazoa	0.53	unclassified_Metazoa	0.17	unclassified_Metazoa	0.13	unclassified_Metazoa	0.04	unclassified_Metazoa_sp	0.02	0	0	0	0	0	2	0	0	0	0	0	0	0	0	0	0	0	0	0	0	0	0	0	0	0	0	0	0	0	0	8	0	0	0
65548eb6244702a8720dd6f17fa75a1ebec4570c	#N/A	Metazoa	0.85	unclassified_Metazoa	0.49	unclassified_Metazoa	0.32	unclassified_Metazoa	0.15	unclassified_Metazoa	0.06	unclassified_Metazoa	0.04	unclassified_Metazoa_sp	0.02	11	0	0	0	0	0	0	0	0	0	0	0	0	0	0	0	0	0	0	0	0	0	0	0	0	0	0	0	0	0	0	0	0	0
98a5664cb5f7bb19234a2d482e2ad6601688b3b2	#N/A	Metazoa	0.84	unclassified_Metazoa	0.78	unclassified_Metazoa	0.68	unclassified_Metazoa	0.21	unclassified_Metazoa	0.1	unclassified_Metazoa	0.04	unclassified_Metazoa_sp	0.02	0	0	0	2	0	0	0	0	0	0	0	0	0	0	0	0	0	0	0	0	0	0	0	0	0	0	0	0	0	0	0	0	0	0
d38f48fabcac517c7d6505eecb25c455af8eca50	#N/A	Metazoa	0.97	unclassified_Metazoa	0.73	unclassified_Metazoa	0.07	unclassified_Metazoa	0.07	unclassified_Metazoa	0.05	unclassified_Metazoa	0.04	unclassified_Metazoa_sp	0.02	0	0	0	0	0	0	0	0	0	0	0	0	0	0	0	0	0	0	0	0	0	0	0	0	0	0	0	0	0	0	0	3	0	0
8c5c392f134c9b9243df412e5a8432ab4abb504e	#N/A	Metazoa	0.93	unclassified_Metazoa	0.47	unclassified_Metazoa	0.28	unclassified_Metazoa	0.05	unclassified_Metazoa	0.04	unclassified_Metazoa	0.04	unclassified_Metazoa_sp	0.01	0	0	0	0	0	0	0	26	0	0	73	0	0	0	0	0	0	0	0	0	0	0	0	0	0	0	0	0	0	0	0	0	0	0
90bae7fd2c7e760c88394488ce7b1541e0fe1999	#N/A	Metazoa	0.88	unclassified_Metazoa	0.66	unclassified_Metazoa	0.25	unclassified_Metazoa	0.06	unclassified_Metazoa	0.05	unclassified_Metazoa	0.04	unclassified_Metazoa_sp	0.01	0	5	0	0	0	0	0	0	0	0	0	0	0	0	0	0	0	0	0	0	0	0	0	0	0	0	0	0	0	0	12	0	0	0
037d762cc29b3cde2a90c8a2e04805095b4cf813	#N/A	Metazoa	0.94	unclassified_Metazoa	0.66	unclassified_Metazoa	0.41	unclassified_Metazoa	0.32	unclassified_Metazoa	0.07	unclassified_Metazoa	0.03	unclassified_Metazoa_sp	0.03	0	0	0	0	0	0	0	0	0	0	0	0	0	0	0	0	0	0	0	0	0	0	0	0	0	5	0	0	0	0	0	0	0	0
0535f62097c6c7fae8826225a4c41e0eec679287	#N/A	Metazoa	0.87	unclassified_Metazoa	0.73	unclassified_Metazoa	0.43	unclassified_Metazoa	0.1	unclassified_Metazoa	0.04	unclassified_Metazoa	0.03	unclassified_Metazoa_sp	0.03	0	0	0	0	0	0	0	0	0	0	0	0	0	0	0	0	0	0	0	0	0	0	0	0	0	0	0	0	0	0	0	0	0	0
07ad03aa9dbc6f24c6cb20de39a82e2f989c4079	#N/A	Metazoa	1	unclassified_Metazoa	0.78	unclassified_Metazoa	0.2	unclassified_Metazoa	0.08	unclassified_Metazoa	0.03	unclassified_Metazoa	0.03	unclassified_Metazoa_sp	0.03	0	0	0	0	0	0	0	0	0	0	0	0	0	0	0	0	0	0	0	0	0	0	0	0	0	0	0	0	0	0	38	0	0	0
1167db0054494830083a40dbde24bd38e1b4d962	#N/A	Metazoa	0.87	unclassified_Metazoa	0.56	unclassified_Metazoa	0.17	unclassified_Metazoa	0.04	unclassified_Metazoa	0.03	unclassified_Metazoa	0.03	unclassified_Metazoa_sp	0.03	0	0	0	0	0	0	0	0	0	0	0	0	0	0	0	0	0	0	0	0	0	0	0	0	0	0	0	0	0	0	5	0	0	0
118cf7e9a6d741dc5748c9d9f32aeddfdd896fa1	#N/A	Metazoa	0.85	unclassified_Metazoa	0.65	unclassified_Metazoa	0.59	unclassified_Metazoa	0.2	unclassified_Metazoa	0.04	unclassified_Metazoa	0.03	unclassified_Metazoa_sp	0.03	0	0	0	0	0	0	0	0	0	0	0	0	0	0	0	0	0	0	4	0	0	0	0	0	0	0	0	0	0	0	0	0	0	0
138f6c94798f52b3050878eeecec6d41dc33fd2c	#N/A	Metazoa	0.81	unclassified_Metazoa	0.46	unclassified_Metazoa	0.29	unclassified_Metazoa	0.11	unclassified_Metazoa	0.04	unclassified_Metazoa	0.03	unclassified_Metazoa_sp	0.03	0	0	0	0	0	0	0	0	0	0	0	0	0	0	0	0	0	0	0	0	23	128	0	0	0	0	0	0	0	0	0	0	0	0
14989e6e98167ab5ba4f139a4cdc30d6144b6da8	#N/A	Metazoa	0.82	unclassified_Metazoa	0.09	unclassified_Metazoa	0.09	unclassified_Metazoa	0.06	unclassified_Metazoa	0.03	unclassified_Metazoa	0.03	unclassified_Metazoa_sp	0.03	0	0	0	0	0	0	0	0	0	0	0	0	0	0	0	0	0	0	0	0	0	0	0	0	0	0	0	0	0	0	0	0	0	0
1558247ecb2345b0c16db44c87a387c0baf4a848	#N/A	Metazoa	0.8	unclassified_Metazoa	0.36	unclassified_Metazoa	0.14	unclassified_Metazoa	0.05	unclassified_Metazoa	0.03	unclassified_Metazoa	0.03	unclassified_Metazoa_sp	0.03	0	0	0	0	0	0	0	0	0	0	0	0	0	0	0	0	0	0	0	0	0	0	0	0	0	0	0	0	0	0	0	0	0	0
1e99aaad5973d3149b91813ee31e92136f4cb8c4	#N/A	Metazoa	0.85	unclassified_Metazoa	0.1	unclassified_Metazoa	0.05	unclassified_Metazoa	0.03	unclassified_Metazoa	0.03	unclassified_Metazoa	0.03	unclassified_Metazoa_sp	0.03	0	0	0	0	0	0	0	0	0	0	0	0	0	0	0	0	0	0	0	0	0	0	0	0	0	0	0	0	0	0	0	0	0	0
2240360ff6f5ae8f8b80e64358dc1a6f231eaf62	#N/A	Metazoa	0.86	unclassified_Metazoa	0.58	unclassified_Metazoa	0.48	unclassified_Metazoa	0.15	unclassified_Metazoa	0.04	unclassified_Metazoa	0.03	unclassified_Metazoa_sp	0.03	0	0	0	0	0	0	0	0	0	0	0	0	0	0	0	0	0	2	0	0	0	0	0	0	0	0	0	0	0	0	0	0	0	0
2409dc8ebdae3cce8258fbae481d53e98ba0b8f2	#N/A	Metazoa	0.86	unclassified_Metazoa	0.05	unclassified_Metazoa	0.03	unclassified_Metazoa	0.03	unclassified_Metazoa	0.03	unclassified_Metazoa	0.03	unclassified_Metazoa_sp	0.03	0	0	0	0	0	0	0	0	0	3	0	0	0	0	0	0	0	0	0	0	0	0	0	0	0	0	0	0	0	0	3	0	0	0
241e176d2487584bcbdc36b75bc000820740ac2a	#N/A	Metazoa	0.89	unclassified_Metazoa	0.55	unclassified_Metazoa	0.21	unclassified_Metazoa	0.2	unclassified_Metazoa	0.12	unclassified_Metazoa	0.03	unclassified_Metazoa_sp	0.03	0	0	0	0	0	0	0	0	0	0	0	0	0	0	0	0	0	0	0	0	0	0	0	0	0	0	0	0	0	0	0	0	0	0
251cec4b584b81e24f83a611f06b72443c472f9f	#N/A	Metazoa	0.89	unclassified_Metazoa	0.53	unclassified_Metazoa	0.41	unclassified_Metazoa	0.1	unclassified_Metazoa	0.03	unclassified_Metazoa	0.03	unclassified_Metazoa_sp	0.03	0	0	0	0	2	0	0	0	0	0	0	0	0	0	0	0	0	0	4	0	0	0	0	0	0	0	0	0	0	0	0	0	0	0
2747f5a6c4080b52be662c55607ac26c8671cb6c	#N/A	Metazoa	0.99	unclassified_Metazoa	0.59	unclassified_Metazoa	0.3	unclassified_Metazoa	0.15	unclassified_Metazoa	0.04	unclassified_Metazoa	0.03	unclassified_Metazoa_sp	0.03	0	0	0	0	0	0	0	0	0	0	0	21	5	0	0	0	0	0	0	0	0	0	0	0	0	0	0	0	0	0	0	0	0	0
29f17302ad62c336e53d2163359fdaf0afb4074f	#N/A	Metazoa	0.85	unclassified_Metazoa	0.55	unclassified_Metazoa	0.31	unclassified_Metazoa	0.09	unclassified_Metazoa	0.04	unclassified_Metazoa	0.03	unclassified_Metazoa_sp	0.03	0	0	0	0	0	0	0	0	0	0	0	0	0	0	0	0	0	0	0	0	0	0	0	0	0	0	0	0	0	0	0	0	0	0
2a3aa52fdf2b7caf692f06c143da85561ac0967f	#N/A	Metazoa	0.96	unclassified_Metazoa	0.75	unclassified_Metazoa	0.57	unclassified_Metazoa	0.18	unclassified_Metazoa	0.04	unclassified_Metazoa	0.03	unclassified_Metazoa_sp	0.03	0	0	0	0	0	0	0	0	0	0	0	0	0	0	0	0	0	2	0	0	0	0	0	0	0	0	0	0	0	0	0	0	0	0
2b0c08d5b96643221411ef48aa50e187de56bcff	#N/A	Metazoa	0.89	unclassified_Metazoa	0.63	unclassified_Metazoa	0.49	unclassified_Metazoa	0.17	unclassified_Metazoa	0.07	unclassified_Metazoa	0.03	unclassified_Metazoa_sp	0.03	0	0	0	0	0	0	0	0	2	0	0	0	0	0	0	0	0	0	0	0	0	0	0	0	0	0	0	0	0	0	0	0	0	0
2bbf4d996ad1d8b3162942260dcc7f42537cc4e2	#N/A	Metazoa	0.84	unclassified_Metazoa	0.59	unclassified_Metazoa	0.26	unclassified_Metazoa	0.09	unclassified_Metazoa	0.03	unclassified_Metazoa	0.03	unclassified_Metazoa_sp	0.03	0	0	0	0	0	0	0	0	0	0	0	0	0	3	0	0	0	0	0	0	0	0	0	0	0	0	0	0	0	0	0	0	0	0
2d9c6f650c334861270b310a898c23e57bc34b17	#N/A	Metazoa	0.81	unclassified_Metazoa	0.17	unclassified_Metazoa	0.17	unclassified_Metazoa	0.04	unclassified_Metazoa	0.03	unclassified_Metazoa	0.03	unclassified_Metazoa_sp	0.03	0	0	0	0	0	0	0	0	0	0	0	0	0	0	0	0	0	0	0	0	0	4	12	0	0	0	0	0	0	0	0	0	0	0
2ea9286d0d2d809c74bdb329bab1953751902b34	#N/A	Metazoa	0.9	unclassified_Metazoa	0.25	unclassified_Metazoa	0.1	unclassified_Metazoa	0.03	unclassified_Metazoa	0.03	unclassified_Metazoa	0.03	unclassified_Metazoa_sp	0.03	0	0	0	0	0	0	0	0	0	0	0	0	0	0	0	0	0	0	0	0	0	0	0	0	0	0	0	0	0	0	0	0	0	12
2ffeed35fb79084f305d07b73a186f2467757c48	#N/A	Metazoa	1	unclassified_Metazoa	0.75	unclassified_Metazoa	0.12	unclassified_Metazoa	0.09	unclassified_Metazoa	0.03	unclassified_Metazoa	0.03	unclassified_Metazoa_sp	0.03	0	0	0	5	0	0	0	0	0	0	0	0	0	0	0	0	0	0	0	0	0	0	0	272	0	34	79	0	0	12	0	0	0	3
39fd03a43caac81be341c7dc3123dd869626790e	#N/A	Metazoa	0.9	unclassified_Metazoa	0.46	unclassified_Metazoa	0.32	unclassified_Metazoa	0.11	unclassified_Metazoa	0.06	unclassified_Metazoa	0.03	unclassified_Metazoa_sp	0.03	0	0	0	0	0	0	0	0	0	0	0	0	0	0	0	0	0	0	0	0	0	0	0	0	0	0	0	0	0	0	0	0	0	0
3da8129edf59fd1ae4ccd9f6d9c0b7ae8d434739	#N/A	Metazoa	0.85	unclassified_Metazoa	0.33	unclassified_Metazoa	0.06	unclassified_Metazoa	0.03	unclassified_Metazoa	0.03	unclassified_Metazoa	0.03	unclassified_Metazoa_sp	0.03	0	0	0	0	0	0	0	0	0	0	0	0	0	0	0	0	0	0	0	2	0	0	0	0	0	0	0	0	0	0	0	0	0	0
3e23a0809f2fd3739fa12fb42ec717cfbbfab139	#N/A	Metazoa	0.84	unclassified_Metazoa	0.7	unclassified_Metazoa	0.32	unclassified_Metazoa	0.03	unclassified_Metazoa	0.03	unclassified_Metazoa	0.03	unclassified_Metazoa_sp	0.03	0	0	0	0	0	0	0	0	0	0	0	0	0	0	0	0	0	0	0	0	0	0	0	0	0	0	0	0	0	0	0	0	0	0
3e45c0ec2a44ceaaaf4448964cf6d97aaf378b03	#N/A	Metazoa	0.81	unclassified_Metazoa	0.04	unclassified_Metazoa	0.04	unclassified_Metazoa	0.04	unclassified_Metazoa	0.04	unclassified_Metazoa	0.03	unclassified_Metazoa_sp	0.03	0	0	0	0	0	0	0	0	0	0	0	0	0	0	0	0	0	0	0	0	0	0	0	0	0	0	0	0	0	0	0	0	0	0
4219d105551efe50e58ac792b7c9e02fe19f08db	#N/A	Metazoa	0.81	unclassified_Metazoa	0.58	unclassified_Metazoa	0.55	unclassified_Metazoa	0.16	unclassified_Metazoa	0.03	unclassified_Metazoa	0.03	unclassified_Metazoa_sp	0.03	0	0	0	0	0	0	0	0	0	0	0	0	0	0	0	0	0	0	0	0	0	0	0	0	0	0	0	0	0	0	0	0	0	0
4698ba96cf1f6df331a9a00642eb8c0690d870fe	#N/A	Metazoa	0.81	unclassified_Metazoa	0.03	unclassified_Metazoa	0.03	unclassified_Metazoa	0.03	unclassified_Metazoa	0.03	unclassified_Metazoa	0.03	unclassified_Metazoa_sp	0.03	0	0	0	0	0	0	0	0	0	0	0	0	0	0	0	0	0	0	0	0	0	0	14	0	0	0	0	0	0	0	0	0	0	0
4820243a652ec0a544f1df13faf667fc25aab5ff	#N/A	Metazoa	1	unclassified_Metazoa	0.78	unclassified_Metazoa	0.62	unclassified_Metazoa	0.2	unclassified_Metazoa	0.06	unclassified_Metazoa	0.03	unclassified_Metazoa_sp	0.03	0	0	0	0	0	0	0	0	0	0	0	0	0	0	0	0	0	0	0	12	0	12	0	0	0	0	0	0	0	0	0	0	0	0
4aed6067c112b5bd624b117959d0763bc5484c9d	#N/A	Metazoa	0.99	unclassified_Metazoa	0.69	unclassified_Metazoa	0.48	unclassified_Metazoa	0.03	unclassified_Metazoa	0.03	unclassified_Metazoa	0.03	unclassified_Metazoa_sp	0.03	0	0	0	0	0	0	0	0	0	0	0	0	0	0	0	0	0	0	0	0	0	0	0	0	0	0	2	0	0	0	0	0	0	0
4af5f683caf78c8945f632298d51ae79bd603e6e	#N/A	Metazoa	0.81	unclassified_Metazoa	0.31	unclassified_Metazoa	0.21	unclassified_Metazoa	0.11	unclassified_Metazoa	0.04	unclassified_Metazoa	0.03	unclassified_Metazoa_sp	0.03	0	0	0	0	0	0	0	0	0	0	0	0	0	0	0	0	0	0	0	0	0	0	0	6	3	9	0	137	19	0	0	0	0	0
50d7dd55af81f5ee31f282d655e7d2ae4d3c9251	#N/A	Metazoa	0.91	unclassified_Metazoa	0.47	unclassified_Metazoa	0.19	unclassified_Metazoa	0.14	unclassified_Metazoa	0.03	unclassified_Metazoa	0.03	unclassified_Metazoa_sp	0.03	0	0	0	0	0	0	0	0	0	0	0	0	0	0	0	0	0	0	0	0	0	0	0	0	0	0	0	0	0	0	0	0	0	0
522952aa376a4fb86add441e90c92487def3c734	#N/A	Metazoa	0.84	unclassified_Metazoa	0.69	unclassified_Metazoa	0.52	unclassified_Metazoa	0.14	unclassified_Metazoa	0.04	unclassified_Metazoa	0.03	unclassified_Metazoa_sp	0.03	0	0	0	0	0	0	0	0	0	0	0	0	0	0	0	0	0	0	0	0	0	0	0	0	0	0	0	0	0	0	0	0	0	0
535d3c43e5e7b96965ff2ee92fe3d3a6bd16eda3	#N/A	Metazoa	0.81	unclassified_Metazoa	0.13	unclassified_Metazoa	0.13	unclassified_Metazoa	0.05	unclassified_Metazoa	0.03	unclassified_Metazoa	0.03	unclassified_Metazoa_sp	0.03	0	0	0	0	0	0	0	0	0	0	0	0	0	0	0	0	0	0	0	0	0	0	0	0	0	0	0	0	0	0	0	0	5	0
5a58a89daee58cba27f838e4ffa219f518df1042	#N/A	Metazoa	0.85	unclassified_Metazoa	0.57	unclassified_Metazoa	0.37	unclassified_Metazoa	0.19	unclassified_Metazoa	0.13	unclassified_Metazoa	0.03	unclassified_Metazoa_sp	0.03	0	0	0	0	0	0	0	0	0	0	0	0	0	0	0	0	0	0	0	0	0	0	0	0	0	0	0	0	3	0	0	0	0	0
5e7060d2b442eb2c802ec1bcebed54ffc272db2d	#N/A	Metazoa	0.84	unclassified_Metazoa	0.52	unclassified_Metazoa	0.06	unclassified_Metazoa	0.03	unclassified_Metazoa	0.03	unclassified_Metazoa	0.03	unclassified_Metazoa_sp	0.03	0	0	0	0	0	0	0	0	0	0	0	0	0	0	0	0	0	0	0	4	0	0	0	0	0	0	0	0	0	0	8	0	0	0
5f5f94e9fe1abdcdb1e7fa17646bf847bd270994	#N/A	Metazoa	0.85	unclassified_Metazoa	0.68	unclassified_Metazoa	0.57	unclassified_Metazoa	0.31	unclassified_Metazoa	0.05	unclassified_Metazoa	0.03	unclassified_Metazoa_sp	0.03	0	7	0	0	0	0	0	0	0	0	0	0	0	0	0	0	0	0	3	0	0	0	0	0	0	0	0	0	0	0	7	0	0	0
63143f0b0e140296029efa1b2b2837bcea4033c5	#N/A	Metazoa	0.85	unclassified_Metazoa	0.22	unclassified_Metazoa	0.18	unclassified_Metazoa	0.1	unclassified_Metazoa	0.03	unclassified_Metazoa	0.03	unclassified_Metazoa_sp	0.03	0	0	0	0	0	0	0	0	0	0	0	0	0	0	0	0	0	0	0	0	0	0	0	0	0	0	0	0	0	0	0	0	0	0
77d75e9570daaf2d781b7145b6e959374f620b9e	#N/A	Metazoa	0.84	unclassified_Metazoa	0.09	unclassified_Metazoa	0.08	unclassified_Metazoa	0.08	unclassified_Metazoa	0.05	unclassified_Metazoa	0.03	unclassified_Metazoa_sp	0.03	0	0	0	0	0	0	0	0	0	0	0	0	0	0	0	0	0	0	0	0	0	0	0	0	0	0	0	0	0	0	0	0	6	0
7b05689a87bcb041381f7546aaa0ad5b53f6cae6	#N/A	Metazoa	0.82	unclassified_Metazoa	0.55	unclassified_Metazoa	0.4	unclassified_Metazoa	0.03	unclassified_Metazoa	0.03	unclassified_Metazoa	0.03	unclassified_Metazoa_sp	0.03	0	0	0	0	0	0	0	0	0	0	0	0	0	0	0	0	0	0	4	0	0	0	0	0	0	0	0	0	0	0	0	0	0	0
806559a365e8b144c8b2f46c5caf64925904b23a	#N/A	Metazoa	0.83	unclassified_Metazoa	0.03	unclassified_Metazoa	0.03	unclassified_Metazoa	0.03	unclassified_Metazoa	0.03	unclassified_Metazoa	0.03	unclassified_Metazoa_sp	0.03	0	0	0	0	0	0	0	0	0	0	0	0	0	0	0	0	0	0	0	0	0	0	0	0	0	0	0	0	0	0	2	0	0	0
838b10a8cc1ee91387ada86e710215c3b5d27340	#N/A	Metazoa	0.85	unclassified_Metazoa	0.63	unclassified_Metazoa	0.54	unclassified_Metazoa	0.16	unclassified_Metazoa	0.07	unclassified_Metazoa	0.03	unclassified_Metazoa_sp	0.03	0	0	0	0	0	0	0	0	0	0	0	0	0	0	0	0	0	0	0	0	0	0	0	0	0	0	0	0	0	0	0	0	0	0
83ee336af8c09a9ee778efa015f672678f3ec5fb	#N/A	Metazoa	0.83	unclassified_Metazoa	0.3	unclassified_Metazoa	0.16	unclassified_Metazoa	0.12	unclassified_Metazoa	0.08	unclassified_Metazoa	0.03	unclassified_Metazoa_sp	0.03	0	0	0	0	0	0	0	0	0	0	0	0	0	0	0	0	0	0	0	0	0	0	0	0	0	0	0	0	0	0	0	0	3	0
8572b5ad9f1c24c0109215b330739efe8d3ea0ed	#N/A	Metazoa	1	unclassified_Metazoa	0.17	unclassified_Metazoa	0.04	unclassified_Metazoa	0.03	unclassified_Metazoa	0.03	unclassified_Metazoa	0.03	unclassified_Metazoa_sp	0.03	0	0	0	2	0	0	0	0	0	0	0	0	0	0	0	0	0	0	0	0	0	0	0	0	0	0	0	0	0	0	0	0	0	0
8a7f33a94416daaa1bbaba37660533a07fa6a186	#N/A	Metazoa	0.89	unclassified_Metazoa	0.41	unclassified_Metazoa	0.27	unclassified_Metazoa	0.12	unclassified_Metazoa	0.1	unclassified_Metazoa	0.03	unclassified_Metazoa_sp	0.03	0	0	0	0	0	0	0	0	0	0	0	0	0	0	0	0	0	0	0	0	0	0	0	0	0	0	0	0	0	0	4	0	0	0
8b930fd8ddcdd28baf5c8a115eb1f6d098559765	#N/A	Metazoa	0.86	unclassified_Metazoa	0.07	unclassified_Metazoa	0.05	unclassified_Metazoa	0.03	unclassified_Metazoa	0.03	unclassified_Metazoa	0.03	unclassified_Metazoa_sp	0.03	0	0	0	0	0	0	0	0	0	0	0	0	0	0	0	0	0	0	0	0	0	0	0	0	0	0	0	0	0	0	0	0	0	0
8baf384c74f6601858a732ac59337dccd9e6ee8d	#N/A	Metazoa	0.84	unclassified_Metazoa	0.5	unclassified_Metazoa	0.3	unclassified_Metazoa	0.17	unclassified_Metazoa	0.03	unclassified_Metazoa	0.03	unclassified_Metazoa_sp	0.03	0	0	0	0	0	0	0	0	0	0	0	0	0	0	0	0	0	0	0	0	0	0	0	0	0	0	0	0	0	0	0	0	37	0
8ec553c92edc34467e90fbfe89421ac57826c0df	#N/A	Metazoa	0.93	unclassified_Metazoa	0.67	unclassified_Metazoa	0.28	unclassified_Metazoa	0.09	unclassified_Metazoa	0.05	unclassified_Metazoa	0.03	unclassified_Metazoa_sp	0.03	0	0	0	0	0	0	0	0	0	0	0	0	0	0	0	0	0	0	0	0	0	0	0	3	0	0	0	0	4	0	0	0	0	0
90b920adcaf442503c5605b739bc13792e9361d7	#N/A	Metazoa	0.81	unclassified_Metazoa	0.57	unclassified_Metazoa	0.53	unclassified_Metazoa	0.11	unclassified_Metazoa	0.03	unclassified_Metazoa	0.03	unclassified_Metazoa_sp	0.03	0	0	0	0	0	0	0	0	0	0	2	0	0	0	0	0	0	0	0	0	0	0	0	0	0	0	0	0	0	0	0	0	0	0
9a2747f62a3b138480f7b1eb3dff1fe503fc38c6	#N/A	Metazoa	0.8	unclassified_Metazoa	0.43	unclassified_Metazoa	0.15	unclassified_Metazoa	0.08	unclassified_Metazoa	0.03	unclassified_Metazoa	0.03	unclassified_Metazoa_sp	0.03	0	0	0	0	0	0	0	0	0	0	0	0	0	0	0	0	0	0	0	0	0	0	0	0	0	0	0	0	0	0	0	0	0	0
9d775141dd5f9912d48d5bf6a4d8a33351420aed	#N/A	Metazoa	0.8	unclassified_Metazoa	0.18	unclassified_Metazoa	0.18	unclassified_Metazoa	0.04	unclassified_Metazoa	0.04	unclassified_Metazoa	0.03	unclassified_Metazoa_sp	0.03	0	0	0	0	0	0	0	0	0	0	0	0	24	0	0	0	0	0	0	0	0	0	387	0	0	0	0	0	0	0	0	0	0	0
a195de706ac3108eef95039bae370df0f35d26fc	#N/A	Metazoa	0.83	unclassified_Metazoa	0.53	unclassified_Metazoa	0.39	unclassified_Metazoa	0.1	unclassified_Metazoa	0.07	unclassified_Metazoa	0.03	unclassified_Metazoa_sp	0.03	0	0	0	0	0	0	0	0	0	0	0	0	0	0	0	0	2	0	0	0	0	0	0	0	0	0	0	0	0	0	0	0	0	0
a429f8192be9f1dcc841645797bd9a06452496a1	#N/A	Metazoa	0.98	unclassified_Metazoa	0.62	unclassified_Metazoa	0.52	unclassified_Metazoa	0.11	unclassified_Metazoa	0.05	unclassified_Metazoa	0.03	unclassified_Metazoa_sp	0.03	0	0	0	0	0	0	0	0	0	0	0	0	0	0	0	0	0	0	0	0	0	0	0	30	0	0	0	0	0	0	0	0	0	0
a47ae158403cef9932eedbb3da7daa0ebbdf6752	#N/A	Metazoa	0.88	unclassified_Metazoa	0.6	unclassified_Metazoa	0.35	unclassified_Metazoa	0.05	unclassified_Metazoa	0.03	unclassified_Metazoa	0.03	unclassified_Metazoa_sp	0.03	0	0	0	0	0	0	0	0	0	0	0	0	0	0	0	0	0	3	0	0	0	0	0	0	0	0	0	0	0	10	0	0	0	0
a8cccbf0c256999d29e7adf59f865dfa372ba891	#N/A	Metazoa	0.81	unclassified_Metazoa	0.07	unclassified_Metazoa	0.07	unclassified_Metazoa	0.07	unclassified_Metazoa	0.03	unclassified_Metazoa	0.03	unclassified_Metazoa_sp	0.03	0	0	0	0	0	0	0	0	0	0	0	0	0	0	0	0	0	0	0	0	0	0	0	0	0	0	0	0	0	0	0	0	0	0
aec0b2eb6ad9cdaa2194ca36daf0f5232ba34986	#N/A	Metazoa	1	unclassified_Metazoa	0.42	unclassified_Metazoa	0.42	unclassified_Metazoa	0.06	unclassified_Metazoa	0.06	unclassified_Metazoa	0.03	unclassified_Metazoa_sp	0.03	0	0	0	0	0	0	0	0	0	0	0	0	0	0	0	0	0	0	0	0	0	0	0	0	0	0	0	0	0	0	0	0	2	0
b585fcef134e7e4993352deb8cc70efca89ca69e	#N/A	Metazoa	0.95	unclassified_Metazoa	0.52	unclassified_Metazoa	0.17	unclassified_Metazoa	0.09	unclassified_Metazoa	0.03	unclassified_Metazoa	0.03	unclassified_Metazoa_sp	0.03	0	0	0	0	0	0	0	0	0	0	0	0	0	0	0	0	0	0	0	0	0	0	0	0	0	0	0	0	0	0	11	0	4	0
b739c3c7975ad63d995c9bdecf129834b91db988	#N/A	Metazoa	0.9	unclassified_Metazoa	0.63	unclassified_Metazoa	0.51	unclassified_Metazoa	0.1	unclassified_Metazoa	0.04	unclassified_Metazoa	0.03	unclassified_Metazoa_sp	0.03	0	0	0	0	0	0	0	0	0	0	0	0	0	0	0	0	0	0	0	0	0	0	0	0	0	2	0	0	0	0	0	0	0	0
b912be3128165b798135714c71ef342738b55a20	#N/A	Metazoa	0.84	unclassified_Metazoa	0.06	unclassified_Metazoa	0.06	unclassified_Metazoa	0.05	unclassified_Metazoa	0.03	unclassified_Metazoa	0.03	unclassified_Metazoa_sp	0.03	0	0	0	0	0	0	0	0	0	0	0	3	0	0	0	0	0	0	0	0	0	20	81	0	0	0	0	0	4	0	4	0	0	0
bd0101e5b1422d6394324cfea958f4255604e2fa	#N/A	Metazoa	0.95	unclassified_Metazoa	0.67	unclassified_Metazoa	0.1	unclassified_Metazoa	0.05	unclassified_Metazoa	0.04	unclassified_Metazoa	0.03	unclassified_Metazoa_sp	0.03	0	0	0	0	0	0	0	0	0	0	0	0	0	3	0	0	0	0	0	0	0	0	0	0	0	0	0	0	0	0	0	0	0	0
be34d95d14db93869c52a87b8bdf64b30fe04421	#N/A	Metazoa	0.9	unclassified_Metazoa	0.79	unclassified_Metazoa	0.75	unclassified_Metazoa	0.32	unclassified_Metazoa	0.04	unclassified_Metazoa	0.03	unclassified_Metazoa_sp	0.03	0	0	0	0	0	0	0	0	0	0	0	0	0	0	0	0	0	0	0	0	0	0	0	0	0	0	0	0	0	0	0	0	0	0
c02ec596bbdec57cba5928684266c42df333013c	#N/A	Metazoa	0.98	unclassified_Metazoa	0.79	unclassified_Metazoa	0.26	unclassified_Metazoa	0.19	unclassified_Metazoa	0.03	unclassified_Metazoa	0.03	unclassified_Metazoa_sp	0.03	0	0	0	0	0	0	0	0	0	0	0	0	0	0	0	0	0	0	0	0	0	0	0	0	0	0	0	0	8	0	0	0	0	4
c22db803a711fb3c21b64ca5036c35bc1440a2bf	#N/A	Metazoa	0.8	unclassified_Metazoa	0.66	unclassified_Metazoa	0.54	unclassified_Metazoa	0.41	unclassified_Metazoa	0.04	unclassified_Metazoa	0.03	unclassified_Metazoa_sp	0.03	0	0	0	0	0	0	0	0	0	0	0	0	0	0	0	0	0	4	0	0	0	0	0	0	0	0	0	0	0	0	3	0	0	4
c2d809f9bf2bb1ea03e6a79bb60e4208ae8d6bdc	#N/A	Metazoa	1	unclassified_Metazoa	0.75	unclassified_Metazoa	0.53	unclassified_Metazoa	0.2	unclassified_Metazoa	0.03	unclassified_Metazoa	0.03	unclassified_Metazoa_sp	0.03	0	0	0	0	0	0	0	0	0	0	0	5	0	0	0	0	0	0	0	0	0	0	0	0	0	0	0	0	0	0	0	0	0	0
c405bc3fecb4ad3e7d535686b3f34782b29b6d62	#N/A	Metazoa	0.86	unclassified_Metazoa	0.64	unclassified_Metazoa	0.28	unclassified_Metazoa	0.04	unclassified_Metazoa	0.03	unclassified_Metazoa	0.03	unclassified_Metazoa_sp	0.03	0	0	0	0	0	0	0	0	0	0	0	0	0	0	0	0	0	0	0	0	0	0	0	0	0	0	0	0	0	0	0	0	0	0
c4a0b7dba7cc8cc96944f4cd8675c1d66c13b9a8	#N/A	Metazoa	0.82	unclassified_Metazoa	0.03	unclassified_Metazoa	0.03	unclassified_Metazoa	0.03	unclassified_Metazoa	0.03	unclassified_Metazoa	0.03	unclassified_Metazoa_sp	0.03	0	0	0	0	0	0	0	0	0	0	0	0	0	0	0	0	0	0	0	0	0	0	0	0	0	0	3	0	0	0	0	0	0	0
d01b33cb6a93e79e6de1e4197f8891a7835b2fb4	#N/A	Metazoa	0.81	unclassified_Metazoa	0.42	unclassified_Metazoa	0.07	unclassified_Metazoa	0.05	unclassified_Metazoa	0.03	unclassified_Metazoa	0.03	unclassified_Metazoa_sp	0.03	0	0	0	0	0	0	0	0	0	0	0	0	0	0	0	0	0	0	0	0	0	0	0	0	0	0	0	0	0	3	0	0	0	0
d06e7e0edd7f43d6ba344fd1993a0378588d8554	#N/A	Metazoa	0.93	unclassified_Metazoa	0.07	unclassified_Metazoa	0.04	unclassified_Metazoa	0.04	unclassified_Metazoa	0.04	unclassified_Metazoa	0.03	unclassified_Metazoa_sp	0.03	0	0	0	0	0	0	0	0	0	0	0	0	0	0	0	0	0	0	0	0	0	0	0	0	0	0	0	0	0	0	0	2	0	0
d0d8d347ff5e9f61040626868d1c937b61d49957	#N/A	Metazoa	0.86	unclassified_Metazoa	0.12	unclassified_Metazoa	0.09	unclassified_Metazoa	0.04	unclassified_Metazoa	0.03	unclassified_Metazoa	0.03	unclassified_Metazoa_sp	0.03	0	0	0	0	0	0	0	0	0	0	0	0	0	0	0	0	0	0	0	0	0	0	0	0	0	0	0	0	0	0	0	0	0	0
da4dd0edb5596888f46247ccbde6fb55b0863a73	#N/A	Metazoa	0.81	unclassified_Metazoa	0.45	unclassified_Metazoa	0.4	unclassified_Metazoa	0.25	unclassified_Metazoa	0.12	unclassified_Metazoa	0.03	unclassified_Metazoa_sp	0.03	0	0	0	0	0	0	0	0	0	0	0	0	0	0	0	0	5	0	0	0	0	0	0	0	0	0	0	0	0	0	0	0	0	0
e6011049ea9d72ec931ad2ca5a3f1b6e6f54f7de	#N/A	Metazoa	0.84	unclassified_Metazoa	0.35	unclassified_Metazoa	0.09	unclassified_Metazoa	0.08	unclassified_Metazoa	0.03	unclassified_Metazoa	0.03	unclassified_Metazoa_sp	0.03	0	0	0	0	0	0	0	0	0	0	0	0	0	0	0	0	0	0	0	0	0	0	0	0	0	0	0	4	0	0	0	0	0	2
e61d05bd43c69e69a03c0fa04a6a8c96a8864424	#N/A	Metazoa	0.83	unclassified_Metazoa	0.73	unclassified_Metazoa	0.58	unclassified_Metazoa	0.14	unclassified_Metazoa	0.03	unclassified_Metazoa	0.03	unclassified_Metazoa_sp	0.03	0	0	0	0	0	0	0	0	0	0	0	0	0	0	0	0	0	0	0	0	0	0	0	0	0	0	0	0	0	0	9	0	0	0
ec282dda27daa15fe135eb555e2afd2d483a3e0c	#N/A	Metazoa	1	unclassified_Metazoa	0.79	unclassified_Metazoa	0.41	unclassified_Metazoa	0.03	unclassified_Metazoa	0.03	unclassified_Metazoa	0.03	unclassified_Metazoa_sp	0.03	0	0	0	0	0	0	0	0	0	0	0	3	0	4	0	13	0	0	0	0	0	0	0	0	0	0	0	0	0	0	0	0	0	0
ed624f00b7405fdb40e0fb0b1fca3e2fda11c1f0	#N/A	Metazoa	0.8	unclassified_Metazoa	0.09	unclassified_Metazoa	0.03	unclassified_Metazoa	0.03	unclassified_Metazoa	0.03	unclassified_Metazoa	0.03	unclassified_Metazoa_sp	0.03	0	0	0	0	0	0	0	0	0	0	0	0	0	0	0	0	0	0	0	0	0	0	0	0	0	0	0	0	0	8	0	0	19	0
f17e9715d38673c32699d1e1310012edb3be67e0	#N/A	Metazoa	0.9	unclassified_Metazoa	0.31	unclassified_Metazoa	0.27	unclassified_Metazoa	0.07	unclassified_Metazoa	0.03	unclassified_Metazoa	0.03	unclassified_Metazoa_sp	0.03	0	0	0	0	0	0	0	0	0	0	0	0	0	0	0	0	0	0	0	0	0	0	0	0	0	0	0	0	0	0	0	0	0	0
f908343de71f5a0a300dbd42e9087c0785988618	#N/A	Metazoa	0.84	unclassified_Metazoa	0.03	unclassified_Metazoa	0.03	unclassified_Metazoa	0.03	unclassified_Metazoa	0.03	unclassified_Metazoa	0.03	unclassified_Metazoa_sp	0.03	0	0	0	0	0	0	0	0	0	0	0	0	0	0	0	0	0	0	0	0	0	0	18	0	0	0	0	0	0	0	0	0	0	0
f9e149748cf4de90fe01424910bc5a434f963b3f	#N/A	Metazoa	0.96	unclassified_Metazoa	0.73	unclassified_Metazoa	0.57	unclassified_Metazoa	0.11	unclassified_Metazoa	0.03	unclassified_Metazoa	0.03	unclassified_Metazoa_sp	0.03	0	0	0	0	0	0	0	2	0	0	8	0	0	0	0	0	0	0	0	0	0	0	0	0	0	0	0	0	0	0	0	0	0	0
fe98ecd02f31f40688fb9e7519cd3f5571da8068	#N/A	Metazoa	0.86	unclassified_Metazoa	0.31	unclassified_Metazoa	0.19	unclassified_Metazoa	0.03	unclassified_Metazoa	0.03	unclassified_Metazoa	0.03	unclassified_Metazoa_sp	0.03	0	0	0	0	0	0	0	0	0	0	0	0	0	0	0	0	0	8	0	0	0	0	0	0	0	0	0	0	0	0	0	0	0	0
ff480394a14f159ff1f66a8a83d8490415814e8b	#N/A	Metazoa	0.81	unclassified_Metazoa	0.21	unclassified_Metazoa	0.04	unclassified_Metazoa	0.03	unclassified_Metazoa	0.03	unclassified_Metazoa	0.03	unclassified_Metazoa_sp	0.03	0	0	0	0	0	0	0	0	0	0	0	0	0	0	0	0	0	0	0	0	0	0	0	0	0	0	0	0	106	0	0	0	0	0
524f1df301ecc3cf8bedd4478789eeb48b8f9d65	#N/A	Metazoa	0.82	unclassified_Metazoa	0.62	unclassified_Metazoa	0.52	unclassified_Metazoa	0.08	unclassified_Metazoa	0.03	unclassified_Metazoa	0.03	unclassified_Metazoa_sp	0.02	0	0	0	0	0	0	0	0	0	0	0	0	0	0	0	0	0	0	0	0	0	0	0	0	0	0	0	0	0	0	0	0	0	0
74abef8b020927fb74321f4cdedd6dc95b361f56	#N/A	Metazoa	1	unclassified_Metazoa	0.25	unclassified_Metazoa	0.11	unclassified_Metazoa	0.03	unclassified_Metazoa	0.03	unclassified_Metazoa	0.03	unclassified_Metazoa_sp	0.02	0	0	0	0	0	0	0	0	0	0	0	52	0	59	0	0	0	0	0	0	0	0	0	0	0	0	0	0	0	0	0	0	0	0
cabf6511e2856a3783c3d0e4f9e9906021376ebd	#N/A	Metazoa	0.82	unclassified_Metazoa	0.4	unclassified_Metazoa	0.29	unclassified_Metazoa	0.08	unclassified_Metazoa	0.05	unclassified_Metazoa	0.03	unclassified_Metazoa_sp	0.02	0	0	0	5	0	0	0	0	0	0	0	0	0	0	0	0	0	0	0	0	0	0	0	0	0	0	0	0	0	0	0	0	0	0
7116f77fcafb94e9ca49cecbcd72c13b941b5bde	#N/A	Metazoa	0.88	unclassified_Metazoa	0.72	unclassified_Metazoa	0.55	unclassified_Metazoa	0.22	unclassified_Metazoa	0.12	unclassified_Metazoa	0.03	unclassified_Metazoa_sp	0.01	0	0	0	0	0	0	0	0	0	0	0	0	0	0	0	0	0	0	0	0	0	2	0	0	0	0	0	0	0	0	0	0	0	0
7aa4915b9ffdb7948a07862ef8d5f73481c7fd56	#N/A	Metazoa	0.85	unclassified_Metazoa	0.64	unclassified_Metazoa	0.35	unclassified_Metazoa	0.19	unclassified_Metazoa	0.03	unclassified_Metazoa	0.03	unclassified_Metazoa_sp	0.01	0	0	0	0	0	0	0	0	0	0	0	0	0	0	0	0	26	0	0	0	0	0	0	0	0	0	0	0	0	0	0	0	0	0
e631634295ce942e9f33cd28f522fb5636d4c7a0	#N/A	Metazoa	0.8	unclassified_Metazoa	0.56	unclassified_Metazoa	0.51	unclassified_Metazoa	0.09	unclassified_Metazoa	0.04	unclassified_Metazoa	0.03	unclassified_Metazoa_sp	0.01	0	0	0	0	0	0	0	0	0	0	0	0	0	0	0	0	0	0	0	0	0	0	0	0	0	0	0	0	0	0	0	0	0	0
fd2cdf9dc852079161329ed407511e3552c38711	#N/A	Metazoa	0.82	unclassified_Metazoa	0.53	unclassified_Metazoa	0.31	unclassified_Metazoa	0.12	unclassified_Metazoa	0.04	unclassified_Metazoa	0.03	unclassified_Metazoa_sp	0.01	0	0	0	0	0	0	0	0	0	0	0	8	0	0	0	0	0	0	0	0	0	0	0	0	0	0	0	0	0	0	0	0	0	0
032e4772227c08fae04c3837a16557e7a1c1d904	#N/A	Metazoa	0.83	unclassified_Metazoa	0.77	unclassified_Metazoa	0.67	unclassified_Metazoa	0.16	unclassified_Metazoa	0.07	unclassified_Metazoa	0.02	unclassified_Metazoa_sp	0.02	0	0	0	0	0	0	0	0	0	0	0	0	0	0	0	0	0	0	0	0	0	0	0	0	0	0	0	0	0	0	0	0	0	0
04d40e63587422311696f7f334aec40137d9b208	#N/A	Metazoa	1	unclassified_Metazoa	0.79	unclassified_Metazoa	0.48	unclassified_Metazoa	0.04	unclassified_Metazoa	0.02	unclassified_Metazoa	0.02	unclassified_Metazoa_sp	0.02	0	0	0	0	0	0	0	0	0	0	0	0	0	0	0	0	0	0	0	0	0	0	0	0	0	0	0	0	0	0	0	0	0	0
094a6162bcdb9944f2a3c75d23bc4464270d2200	#N/A	Metazoa	0.83	unclassified_Metazoa	0.2	unclassified_Metazoa	0.2	unclassified_Metazoa	0.04	unclassified_Metazoa	0.03	unclassified_Metazoa	0.02	unclassified_Metazoa_sp	0.02	0	0	0	0	0	0	0	0	0	0	0	0	0	0	0	0	0	0	0	0	0	8	0	0	0	0	0	0	0	0	0	0	0	0
103400a2b59b10fab2a379de9917241505bcf585	#N/A	Metazoa	0.84	unclassified_Metazoa	0.45	unclassified_Metazoa	0.29	unclassified_Metazoa	0.14	unclassified_Metazoa	0.03	unclassified_Metazoa	0.02	unclassified_Metazoa_sp	0.02	0	0	0	0	0	0	0	0	0	0	0	0	0	0	0	0	0	0	0	0	0	0	0	0	0	0	0	0	0	0	0	0	0	0
108fbe97a26b0247532e0b3e0b90f6c3daa5ee98	#N/A	Metazoa	0.88	unclassified_Metazoa	0.08	unclassified_Metazoa	0.08	unclassified_Metazoa	0.05	unclassified_Metazoa	0.02	unclassified_Metazoa	0.02	unclassified_Metazoa_sp	0.02	0	0	0	0	0	0	0	0	0	0	0	0	0	0	0	0	0	0	0	0	0	0	0	0	0	0	0	0	0	0	0	45	0	0
15791d9a3e1d0b8d752ba147c7093bf6f20a9556	#N/A	Metazoa	0.91	unclassified_Metazoa	0.19	unclassified_Metazoa	0.1	unclassified_Metazoa	0.05	unclassified_Metazoa	0.05	unclassified_Metazoa	0.02	unclassified_Metazoa_sp	0.02	0	0	0	0	0	0	0	0	0	0	0	0	0	0	0	0	0	0	0	0	0	0	0	0	0	0	0	0	0	0	0	0	0	0
159930c48ed6eb88f68616979244d475fd5bb7f2	#N/A	Metazoa	0.84	unclassified_Metazoa	0.53	unclassified_Metazoa	0.32	unclassified_Metazoa	0.04	unclassified_Metazoa	0.03	unclassified_Metazoa	0.02	unclassified_Metazoa_sp	0.02	0	0	0	0	0	0	0	0	0	0	0	0	0	0	0	0	0	0	0	0	0	0	0	0	0	0	0	0	0	0	0	36	0	0
18b6ad5e3ebb27eb1c063030339fabfcdc43c377	#N/A	Metazoa	0.8	unclassified_Metazoa	0.39	unclassified_Metazoa	0.24	unclassified_Metazoa	0.13	unclassified_Metazoa	0.07	unclassified_Metazoa	0.02	unclassified_Metazoa_sp	0.02	0	0	0	0	0	0	0	0	0	0	0	0	0	0	0	0	0	0	0	0	0	0	0	0	0	0	0	0	0	0	0	0	0	0
1a96eacd6efa06876c67ae8199029e405fa4ca00	#N/A	Metazoa	0.83	unclassified_Metazoa	0.31	unclassified_Metazoa	0.09	unclassified_Metazoa	0.03	unclassified_Metazoa	0.02	unclassified_Metazoa	0.02	unclassified_Metazoa_sp	0.02	0	0	0	0	0	0	0	0	0	0	0	0	0	0	0	0	0	0	0	0	0	0	0	0	0	0	0	0	0	0	0	0	0	0
1b9d1877dda8f82824c05eb75c63d7fb287b2f62	#N/A	Metazoa	0.87	unclassified_Metazoa	0.2	unclassified_Metazoa	0.04	unclassified_Metazoa	0.02	unclassified_Metazoa	0.02	unclassified_Metazoa	0.02	unclassified_Metazoa_sp	0.02	0	0	0	2	0	0	0	0	0	0	0	0	0	0	0	0	0	295	0	0	32	0	2	0	0	0	0	0	0	0	0	0	0	0
1e5c426afb71f3df53b281d8d466fa17e43334fd	#N/A	Metazoa	0.87	unclassified_Metazoa	0.75	unclassified_Metazoa	0.58	unclassified_Metazoa	0.16	unclassified_Metazoa	0.02	unclassified_Metazoa	0.02	unclassified_Metazoa_sp	0.02	0	0	0	0	0	0	0	0	0	7	0	0	0	0	0	0	0	0	0	0	0	0	0	0	0	0	0	0	0	0	0	0	0	0
25c9a65e51c49733ff403e77b0d2b3fe6cf184ce	#N/A	Metazoa	0.88	unclassified_Metazoa	0.47	unclassified_Metazoa	0.27	unclassified_Metazoa	0.13	unclassified_Metazoa	0.02	unclassified_Metazoa	0.02	unclassified_Metazoa_sp	0.02	0	0	0	0	0	0	0	0	0	0	0	0	0	0	0	0	0	0	0	0	0	0	0	0	0	0	0	0	0	0	0	0	0	0
281a5fd6148a92060b23bc40bbfef1bbb1715a07	#N/A	Metazoa	0.97	unclassified_Metazoa	0.71	unclassified_Metazoa	0.23	unclassified_Metazoa	0.15	unclassified_Metazoa	0.02	unclassified_Metazoa	0.02	unclassified_Metazoa_sp	0.02	0	0	0	0	0	0	0	0	0	0	0	0	0	0	0	0	0	0	0	0	0	0	0	0	0	0	0	0	0	0	0	6	0	0
29ec79dafde69c4e267030f90240fff387821ffa	#N/A	Metazoa	0.92	unclassified_Metazoa	0.76	unclassified_Metazoa	0.68	unclassified_Metazoa	0.28	unclassified_Metazoa	0.03	unclassified_Metazoa	0.02	unclassified_Metazoa_sp	0.02	0	0	0	0	0	0	0	0	0	0	0	0	0	0	0	0	0	0	0	0	0	0	0	0	0	0	0	0	3	0	0	0	0	0
2ab9fc2621d64af50808ad5711f7033c70df79b0	#N/A	Metazoa	0.89	unclassified_Metazoa	0.39	unclassified_Metazoa	0.23	unclassified_Metazoa	0.1	unclassified_Metazoa	0.02	unclassified_Metazoa	0.02	unclassified_Metazoa_sp	0.02	0	0	0	0	0	0	0	0	0	0	0	0	0	0	0	0	0	0	0	0	0	0	0	0	0	0	0	0	0	0	0	0	0	0
30c7f5848066236879bc9fba2b8b913ae1389b49	#N/A	Metazoa	0.93	unclassified_Metazoa	0.75	unclassified_Metazoa	0.56	unclassified_Metazoa	0.19	unclassified_Metazoa	0.03	unclassified_Metazoa	0.02	unclassified_Metazoa_sp	0.02	0	0	0	0	0	0	0	0	0	0	0	0	0	0	0	0	0	2	0	0	0	3	0	0	0	0	0	0	0	0	0	0	0	0
351435d77a096444154c7ff947f8e8765dc788bc	#N/A	Metazoa	0.84	unclassified_Metazoa	0.13	unclassified_Metazoa	0.03	unclassified_Metazoa	0.03	unclassified_Metazoa	0.02	unclassified_Metazoa	0.02	unclassified_Metazoa_sp	0.02	0	0	0	0	0	0	0	0	0	0	0	0	0	0	0	0	0	0	0	0	0	0	0	0	0	0	0	0	0	0	0	0	0	0
3799bbd996ae63ef582e45b5442207b93bcceb9b	#N/A	Metazoa	0.84	unclassified_Metazoa	0.73	unclassified_Metazoa	0.55	unclassified_Metazoa	0.21	unclassified_Metazoa	0.13	unclassified_Metazoa	0.02	unclassified_Metazoa_sp	0.02	0	0	0	0	0	0	0	0	0	0	0	0	0	0	0	0	0	0	0	0	0	0	0	0	0	0	0	5	0	0	0	0	0	0
3bcccb7056abf2a3d8782a82f5596dce585a2acc	#N/A	Metazoa	0.81	unclassified_Metazoa	0.65	unclassified_Metazoa	0.45	unclassified_Metazoa	0.06	unclassified_Metazoa	0.03	unclassified_Metazoa	0.02	unclassified_Metazoa_sp	0.02	0	0	0	0	0	0	0	0	0	0	0	0	0	0	0	0	0	0	4	0	0	0	0	0	0	0	0	0	0	0	0	0	0	0
3c860d038d33556a69c02c9634ed8ad0b1756723	#N/A	Metazoa	0.8	unclassified_Metazoa	0.29	unclassified_Metazoa	0.25	unclassified_Metazoa	0.02	unclassified_Metazoa	0.02	unclassified_Metazoa	0.02	unclassified_Metazoa_sp	0.02	0	0	0	0	0	0	0	0	0	0	0	0	0	0	0	0	0	0	0	0	0	0	0	0	0	0	0	0	0	0	0	3	0	0
3d2301fa1aacbde126e133b8ad172ba170e3bf56	#N/A	Metazoa	0.94	unclassified_Metazoa	0.04	unclassified_Metazoa	0.04	unclassified_Metazoa	0.02	unclassified_Metazoa	0.02	unclassified_Metazoa	0.02	unclassified_Metazoa_sp	0.02	0	0	0	0	0	0	0	0	0	0	0	0	0	0	0	0	0	12	0	2	0	0	0	0	0	0	0	0	0	0	0	0	0	0
403bd218627c06ad5a0031a1e4173707072edeca	#N/A	Metazoa	0.98	unclassified_Metazoa	0.29	unclassified_Metazoa	0.05	unclassified_Metazoa	0.02	unclassified_Metazoa	0.02	unclassified_Metazoa	0.02	unclassified_Metazoa_sp	0.02	0	0	0	0	0	0	0	0	0	11	0	0	0	0	0	0	0	0	0	0	0	0	0	0	0	0	0	0	0	0	0	0	0	0
40a9f82093c4c26f6130968ec9d8d61ad8f1670f	#N/A	Metazoa	0.83	unclassified_Metazoa	0.69	unclassified_Metazoa	0.5	unclassified_Metazoa	0.05	unclassified_Metazoa	0.03	unclassified_Metazoa	0.02	unclassified_Metazoa_sp	0.02	0	0	0	0	0	0	0	0	0	0	0	0	0	0	0	0	0	0	0	0	0	0	0	0	0	0	0	0	0	0	0	0	0	0
443d5660f17c0ce06ac11d14ff6dc9e41acc8101	#N/A	Metazoa	0.86	unclassified_Metazoa	0.04	unclassified_Metazoa	0.04	unclassified_Metazoa	0.03	unclassified_Metazoa	0.02	unclassified_Metazoa	0.02	unclassified_Metazoa_sp	0.02	0	0	0	0	0	0	12	0	0	0	0	0	0	0	0	0	0	0	0	0	0	0	0	0	0	0	0	0	0	0	0	0	0	0
44562eefc105c000fdc1c86e7cd0abcdf5a6986b	#N/A	Metazoa	0.97	unclassified_Metazoa	0.72	unclassified_Metazoa	0.29	unclassified_Metazoa	0.18	unclassified_Metazoa	0.03	unclassified_Metazoa	0.02	unclassified_Metazoa_sp	0.02	0	0	0	0	0	0	0	0	0	0	0	0	0	0	0	0	0	0	0	0	0	0	0	0	0	0	0	0	3	0	0	0	0	0
48aee64358cd41552cc9c5be28ff38efd8ae8269	#N/A	Metazoa	0.8	unclassified_Metazoa	0.57	unclassified_Metazoa	0.42	unclassified_Metazoa	0.23	unclassified_Metazoa	0.1	unclassified_Metazoa	0.02	unclassified_Metazoa_sp	0.02	0	0	0	0	0	0	0	0	0	0	0	0	0	0	0	0	0	0	0	0	0	0	0	0	0	0	0	0	0	0	2	0	0	0
4b167f3ebbcde0c8390658dbffe199349eac27a6	#N/A	Metazoa	0.8	unclassified_Metazoa	0.3	unclassified_Metazoa	0.26	unclassified_Metazoa	0.06	unclassified_Metazoa	0.02	unclassified_Metazoa	0.02	unclassified_Metazoa_sp	0.02	0	0	0	0	0	0	0	0	0	0	0	0	0	0	0	0	0	0	0	0	13	0	0	0	0	0	0	0	0	0	0	0	0	0
4e73a866582f705f96b75c56e0171775cc81191e	#N/A	Metazoa	0.8	unclassified_Metazoa	0.56	unclassified_Metazoa	0.31	unclassified_Metazoa	0.12	unclassified_Metazoa	0.08	unclassified_Metazoa	0.02	unclassified_Metazoa_sp	0.02	0	0	0	0	0	0	0	0	0	0	0	0	0	0	0	0	0	0	0	0	4	0	0	0	0	0	0	0	0	0	0	13	0	0
51ff263d0db345e08e378ed0fcfca3a1dbd10ca0	#N/A	Metazoa	0.84	unclassified_Metazoa	0.48	unclassified_Metazoa	0.23	unclassified_Metazoa	0.06	unclassified_Metazoa	0.03	unclassified_Metazoa	0.02	unclassified_Metazoa_sp	0.02	0	0	0	0	0	0	0	0	0	0	0	0	0	0	0	0	0	0	0	0	0	0	0	0	0	0	0	30	0	0	0	0	0	0
5597b3e68ecaab8750941c77c583c45a0e1e045d	#N/A	Metazoa	0.88	unclassified_Metazoa	0.17	unclassified_Metazoa	0.15	unclassified_Metazoa	0.02	unclassified_Metazoa	0.02	unclassified_Metazoa	0.02	unclassified_Metazoa_sp	0.02	0	0	0	0	0	0	0	0	0	0	0	0	0	0	0	0	0	0	0	0	0	0	0	0	0	0	0	0	0	0	0	0	0	0
5766243474173d3e3308a69cda015566c73eb47e	#N/A	Metazoa	0.86	unclassified_Metazoa	0.73	unclassified_Metazoa	0.52	unclassified_Metazoa	0.31	unclassified_Metazoa	0.15	unclassified_Metazoa	0.02	unclassified_Metazoa_sp	0.02	0	0	0	0	0	0	0	0	0	0	0	0	0	0	0	0	0	0	0	0	0	0	2	0	0	0	0	0	0	0	0	0	0	0
5ed7b8d7c337951047c8c899291c251bb5db67c8	#N/A	Metazoa	0.8	unclassified_Metazoa	0.53	unclassified_Metazoa	0.31	unclassified_Metazoa	0.1	unclassified_Metazoa	0.05	unclassified_Metazoa	0.02	unclassified_Metazoa_sp	0.02	0	0	0	0	3	0	0	0	0	0	0	0	0	0	0	0	0	0	0	0	0	0	0	0	0	0	0	0	0	0	0	0	0	0
664e0b282f40d9b5c1ab61bce163540f0737f497	#N/A	Metazoa	0.96	unclassified_Metazoa	0.11	unclassified_Metazoa	0.06	unclassified_Metazoa	0.02	unclassified_Metazoa	0.02	unclassified_Metazoa	0.02	unclassified_Metazoa_sp	0.02	0	0	0	0	0	0	0	0	0	0	0	0	0	0	0	5	0	0	0	0	0	0	0	0	0	0	0	0	0	0	0	0	0	0
6774d0e3d3c7dda8d2fc0e2e16d693c7c89616ef	#N/A	Metazoa	0.83	unclassified_Metazoa	0.3	unclassified_Metazoa	0.3	unclassified_Metazoa	0.04	unclassified_Metazoa	0.03	unclassified_Metazoa	0.02	unclassified_Metazoa_sp	0.02	0	0	0	0	0	0	0	0	0	0	0	0	0	0	0	0	0	0	0	0	0	0	0	0	0	0	0	0	0	0	0	25	3	0
69a9da207ef399fb9a24920931c8e34f7e44063e	#N/A	Metazoa	0.82	unclassified_Metazoa	0.33	unclassified_Metazoa	0.21	unclassified_Metazoa	0.09	unclassified_Metazoa	0.02	unclassified_Metazoa	0.02	unclassified_Metazoa_sp	0.02	0	0	0	0	0	0	0	0	0	0	0	0	0	0	0	0	0	0	0	0	0	0	0	0	0	0	0	54	18	0	0	0	0	0
69be17e8859ca2a04dd6c538aa522b573abc77df	#N/A	Metazoa	0.8	unclassified_Metazoa	0.32	unclassified_Metazoa	0.09	unclassified_Metazoa	0.03	unclassified_Metazoa	0.02	unclassified_Metazoa	0.02	unclassified_Metazoa_sp	0.02	0	0	0	0	0	0	0	0	0	0	0	0	0	0	0	0	0	0	0	0	0	0	0	0	5	0	0	0	0	0	0	0	0	0
70a9e193f0953a49cadd0d384ae855a1d0814b08	#N/A	Metazoa	0.82	unclassified_Metazoa	0.44	unclassified_Metazoa	0.41	unclassified_Metazoa	0.29	unclassified_Metazoa	0.02	unclassified_Metazoa	0.02	unclassified_Metazoa_sp	0.02	0	0	0	0	0	0	0	0	0	0	0	0	0	0	0	0	0	0	0	0	0	0	0	2	0	0	0	0	0	0	0	0	0	0
713cf24f4a89675ebac93980eb631b5916530f87	#N/A	Metazoa	0.95	unclassified_Metazoa	0.77	unclassified_Metazoa	0.53	unclassified_Metazoa	0.12	unclassified_Metazoa	0.07	unclassified_Metazoa	0.02	unclassified_Metazoa_sp	0.02	0	0	0	0	0	0	0	0	0	0	0	0	0	0	0	0	0	0	0	0	0	0	0	0	0	0	0	0	0	0	0	0	0	0
74aa10275ec4285b9ad6335a6c661584f57b41c8	#N/A	Metazoa	0.87	unclassified_Metazoa	0.05	unclassified_Metazoa	0.05	unclassified_Metazoa	0.02	unclassified_Metazoa	0.02	unclassified_Metazoa	0.02	unclassified_Metazoa_sp	0.02	0	0	0	0	0	0	0	0	0	0	0	0	0	0	0	0	0	3	0	0	0	0	0	0	0	0	0	0	0	0	0	0	0	0
7a79664d26c919d93e793e068993000cad03c3af	#N/A	Metazoa	0.83	unclassified_Metazoa	0.46	unclassified_Metazoa	0.38	unclassified_Metazoa	0.04	unclassified_Metazoa	0.02	unclassified_Metazoa	0.02	unclassified_Metazoa_sp	0.02	0	0	0	0	0	0	0	0	0	0	0	0	0	0	0	0	0	0	0	0	0	28	0	0	0	0	0	0	0	0	0	0	0	0
7b6ea63ded18669b27ac08eea8c4c9b09344b873	#N/A	Metazoa	1	unclassified_Metazoa	0.43	unclassified_Metazoa	0.4	unclassified_Metazoa	0.17	unclassified_Metazoa	0.02	unclassified_Metazoa	0.02	unclassified_Metazoa_sp	0.02	0	0	0	0	0	0	0	0	0	0	9	0	0	0	0	0	0	0	0	0	0	0	0	0	0	0	0	0	0	0	0	0	0	0
7be2aabeef909cbc62b2481c60c8b348b2aa9c3c	#N/A	Metazoa	0.87	unclassified_Metazoa	0.46	unclassified_Metazoa	0.25	unclassified_Metazoa	0.02	unclassified_Metazoa	0.02	unclassified_Metazoa	0.02	unclassified_Metazoa_sp	0.02	0	0	0	0	0	0	0	0	0	0	0	0	0	0	0	0	0	0	0	0	0	0	0	0	0	0	0	2	0	0	0	0	0	0
7f34d3bd44387f3c5901d5ef4ef5848807f4be0e	#N/A	Metazoa	0.84	unclassified_Metazoa	0.39	unclassified_Metazoa	0.19	unclassified_Metazoa	0.05	unclassified_Metazoa	0.02	unclassified_Metazoa	0.02	unclassified_Metazoa_sp	0.02	0	0	0	0	0	0	0	0	0	0	0	0	0	0	0	0	0	0	0	0	18	0	0	0	0	0	0	0	0	0	0	0	0	0
8170f88bb640c158a9e9428b48d34adeb914c5d3	#N/A	Metazoa	0.91	unclassified_Metazoa	0.69	unclassified_Metazoa	0.52	unclassified_Metazoa	0.1	unclassified_Metazoa	0.03	unclassified_Metazoa	0.02	unclassified_Metazoa_sp	0.02	0	0	0	0	0	0	0	0	0	0	0	0	0	0	0	0	3	0	0	0	0	0	0	0	0	0	0	0	82	0	0	2	2	0
8306c6b733ab6f742b9786204faecda33450f29c	#N/A	Metazoa	0.84	unclassified_Metazoa	0.45	unclassified_Metazoa	0.06	unclassified_Metazoa	0.06	unclassified_Metazoa	0.02	unclassified_Metazoa	0.02	unclassified_Metazoa_sp	0.02	0	0	0	0	0	0	0	0	0	0	0	0	0	0	0	0	0	62	0	0	0	0	0	0	0	0	0	0	0	0	0	0	0	0
836efcc10ae10f3ab47005e0087ade7074abb0ff	#N/A	Metazoa	0.9	unclassified_Metazoa	0.6	unclassified_Metazoa	0.48	unclassified_Metazoa	0.08	unclassified_Metazoa	0.02	unclassified_Metazoa	0.02	unclassified_Metazoa_sp	0.02	0	0	0	0	0	0	0	0	0	0	0	0	0	0	0	0	0	0	0	0	0	0	0	0	0	0	0	0	0	0	0	0	0	0
851a58150839b62961849efb198b5ad3edc063d9	#N/A	Metazoa	0.82	unclassified_Metazoa	0.72	unclassified_Metazoa	0.6	unclassified_Metazoa	0.16	unclassified_Metazoa	0.03	unclassified_Metazoa	0.02	unclassified_Metazoa_sp	0.02	0	0	0	0	0	0	0	2	0	0	0	0	0	0	0	0	0	0	0	0	0	0	0	0	0	0	0	0	0	0	0	0	0	0
8a2a4f4faf1c3839fb6a6f515f7c12d880d19fb7	#N/A	Metazoa	0.83	unclassified_Metazoa	0.54	unclassified_Metazoa	0.29	unclassified_Metazoa	0.1	unclassified_Metazoa	0.02	unclassified_Metazoa	0.02	unclassified_Metazoa_sp	0.02	0	0	0	0	0	0	0	0	0	0	0	0	0	0	0	0	0	2	0	0	0	0	0	0	0	0	0	0	0	0	0	0	0	0
8e6bfd3b50818ddcb33b88362d55a0836c28112c	#N/A	Metazoa	0.9	unclassified_Metazoa	0.7	unclassified_Metazoa	0.59	unclassified_Metazoa	0.13	unclassified_Metazoa	0.04	unclassified_Metazoa	0.02	unclassified_Metazoa_sp	0.02	0	0	0	0	0	0	0	0	0	2	0	0	0	0	0	0	0	0	0	0	0	0	0	0	0	0	0	0	0	0	0	0	0	0
9105108fd949fb83d46e3aca97da3bf4e9450b34	#N/A	Metazoa	0.83	unclassified_Metazoa	0.43	unclassified_Metazoa	0.02	unclassified_Metazoa	0.02	unclassified_Metazoa	0.02	unclassified_Metazoa	0.02	unclassified_Metazoa_sp	0.02	16	17	0	0	2	0	0	12	0	0	0	0	0	0	0	0	0	0	0	0	0	0	0	0	0	0	0	0	0	0	30	20	24	15
9377cb01c64d3e7ad02ca5d760e621f61279c92d	#N/A	Metazoa	0.82	unclassified_Metazoa	0.54	unclassified_Metazoa	0.06	unclassified_Metazoa	0.03	unclassified_Metazoa	0.02	unclassified_Metazoa	0.02	unclassified_Metazoa_sp	0.02	0	0	0	0	0	0	0	0	0	0	0	0	0	0	0	0	0	0	0	0	0	0	0	0	0	0	0	0	3	0	0	0	0	0
9478d3826ce67d0ca4184c796914fa094dc66ac1	#N/A	Metazoa	0.89	unclassified_Metazoa	0.34	unclassified_Metazoa	0.08	unclassified_Metazoa	0.03	unclassified_Metazoa	0.03	unclassified_Metazoa	0.02	unclassified_Metazoa_sp	0.02	0	0	0	0	0	0	0	0	0	0	0	0	0	0	0	0	0	0	0	0	0	0	0	0	0	0	0	0	0	0	0	0	0	0
a09e3cb35fe592ea1cea191dad16e5a6220628a5	#N/A	Metazoa	0.83	unclassified_Metazoa	0.03	unclassified_Metazoa	0.03	unclassified_Metazoa	0.03	unclassified_Metazoa	0.02	unclassified_Metazoa	0.02	unclassified_Metazoa_sp	0.02	0	0	0	0	0	0	0	0	0	0	0	0	0	0	0	0	0	0	0	0	0	0	3	0	0	0	0	0	0	0	0	0	0	0
a6ca43e7934f3708f1c3bab4561dd4de351f7bbf	#N/A	Metazoa	0.97	unclassified_Metazoa	0.2	unclassified_Metazoa	0.08	unclassified_Metazoa	0.02	unclassified_Metazoa	0.02	unclassified_Metazoa	0.02	unclassified_Metazoa_sp	0.02	2	0	0	0	0	0	0	0	2	0	0	27	0	42	3	0	0	3	0	0	4	0	0	0	0	0	0	0	0	0	0	0	3	0
a8f2f261db0a93372a029b0219386495c8d324f0	#N/A	Metazoa	0.8	unclassified_Metazoa	0.73	unclassified_Metazoa	0.63	unclassified_Metazoa	0.19	unclassified_Metazoa	0.06	unclassified_Metazoa	0.02	unclassified_Metazoa_sp	0.02	0	0	0	0	0	0	0	0	0	0	0	0	0	0	0	0	0	0	0	0	0	0	0	0	0	0	0	0	0	0	0	0	0	0
af6f041a37adc8d8a1141b03a6250f72bbf4801a	#N/A	Metazoa	0.85	unclassified_Metazoa	0.23	unclassified_Metazoa	0.2	unclassified_Metazoa	0.02	unclassified_Metazoa	0.02	unclassified_Metazoa	0.02	unclassified_Metazoa_sp	0.02	0	0	0	0	0	0	0	0	0	0	0	0	0	0	0	0	0	0	0	0	0	0	0	0	0	0	0	0	0	0	0	0	0	0
b14e617c7e710aa28e7075c314ae2077f5e49144	#N/A	Metazoa	0.8	unclassified_Metazoa	0.71	unclassified_Metazoa	0.62	unclassified_Metazoa	0.09	unclassified_Metazoa	0.02	unclassified_Metazoa	0.02	unclassified_Metazoa_sp	0.02	0	0	0	0	0	0	0	0	0	0	0	0	0	0	0	0	0	0	0	0	0	0	0	0	2	0	0	0	0	0	0	0	0	0
b23465da5923830287e4039ac5f28d8f6530764f	#N/A	Metazoa	0.88	unclassified_Metazoa	0.79	unclassified_Metazoa	0.68	unclassified_Metazoa	0.34	unclassified_Metazoa	0.06	unclassified_Metazoa	0.02	unclassified_Metazoa_sp	0.02	0	0	0	0	0	0	0	0	0	0	0	0	0	0	0	0	0	0	0	0	0	0	0	0	0	0	0	0	0	2	0	0	0	0
b5bf52ad4b52a5cc8b652bc720f13eb0b8dd1c3c	#N/A	Metazoa	0.83	unclassified_Metazoa	0.09	unclassified_Metazoa	0.09	unclassified_Metazoa	0.02	unclassified_Metazoa	0.02	unclassified_Metazoa	0.02	unclassified_Metazoa_sp	0.02	0	0	0	0	0	0	46	0	0	0	0	0	0	0	0	0	0	0	0	0	0	0	0	0	0	0	0	0	0	0	0	0	0	0
b6bcd819d19e8b3ede33726f89f684c875ebf07f	#N/A	Metazoa	0.96	unclassified_Metazoa	0.73	unclassified_Metazoa	0.62	unclassified_Metazoa	0.21	unclassified_Metazoa	0.03	unclassified_Metazoa	0.02	unclassified_Metazoa_sp	0.02	0	0	0	0	0	0	0	0	0	0	0	0	0	0	0	0	0	6	0	0	0	0	0	0	0	0	0	0	0	0	0	0	0	0
bff0bad22cf84417c4c6d6f230b3b0073fe179ed	#N/A	Metazoa	0.84	unclassified_Metazoa	0.19	unclassified_Metazoa	0.15	unclassified_Metazoa	0.1	unclassified_Metazoa	0.05	unclassified_Metazoa	0.02	unclassified_Metazoa_sp	0.02	0	0	0	0	0	0	0	0	0	0	0	0	0	0	0	0	0	0	0	2	0	0	0	0	0	0	0	0	0	0	0	0	0	0
c40e5500fa01e23290c0c829442018d3cbd11535	#N/A	Metazoa	0.8	unclassified_Metazoa	0.56	unclassified_Metazoa	0.43	unclassified_Metazoa	0.14	unclassified_Metazoa	0.02	unclassified_Metazoa	0.02	unclassified_Metazoa_sp	0.02	0	0	0	0	0	0	0	0	0	0	0	0	0	0	0	0	0	0	0	0	0	0	0	0	0	0	0	0	0	0	0	0	0	0
c5ca211c3bab6d7df4908d58a44121c03296b2dc	#N/A	Metazoa	0.85	unclassified_Metazoa	0.08	unclassified_Metazoa	0.08	unclassified_Metazoa	0.03	unclassified_Metazoa	0.02	unclassified_Metazoa	0.02	unclassified_Metazoa_sp	0.02	0	0	0	0	0	0	0	0	0	0	0	0	0	0	0	0	0	0	0	0	0	0	0	0	0	0	0	0	0	0	0	0	0	0
c6a3c68dd04ade4259b0e7d18371c61c28c5e9f2	#N/A	Metazoa	0.8	unclassified_Metazoa	0.52	unclassified_Metazoa	0.3	unclassified_Metazoa	0.07	unclassified_Metazoa	0.02	unclassified_Metazoa	0.02	unclassified_Metazoa_sp	0.02	0	0	0	0	0	0	0	0	0	0	0	0	0	0	0	0	0	0	0	0	0	0	0	0	0	0	0	2	0	0	0	0	0	0
cc9f7048adb8dda674208e1ada07f46b003a5b72	#N/A	Metazoa	0.95	unclassified_Metazoa	0.14	unclassified_Metazoa	0.11	unclassified_Metazoa	0.08	unclassified_Metazoa	0.05	unclassified_Metazoa	0.02	unclassified_Metazoa_sp	0.02	0	0	0	0	0	0	0	0	0	0	0	0	0	0	0	0	0	0	0	0	0	0	0	0	0	3	0	0	0	0	0	0	0	0
cd294a9e08786297fed7027da8804e25e87cdf00	#N/A	Metazoa	0.84	unclassified_Metazoa	0.66	unclassified_Metazoa	0.59	unclassified_Metazoa	0.2	unclassified_Metazoa	0.04	unclassified_Metazoa	0.02	unclassified_Metazoa_sp	0.02	0	0	0	0	0	0	0	0	0	0	0	0	0	0	0	0	0	0	0	0	0	0	0	0	0	0	0	0	0	0	0	0	0	0
cd947ce2836310fcabb3cf011ff59c105bd8fb59	#N/A	Metazoa	0.99	unclassified_Metazoa	0.23	unclassified_Metazoa	0.05	unclassified_Metazoa	0.02	unclassified_Metazoa	0.02	unclassified_Metazoa	0.02	unclassified_Metazoa_sp	0.02	0	0	0	0	0	0	0	0	0	0	0	0	0	0	0	0	0	0	0	0	0	0	0	0	0	0	0	0	0	0	0	0	0	0
d24670fcbf16e408a2d25fa07d45a3e84f65ee88	#N/A	Metazoa	0.81	unclassified_Metazoa	0.02	unclassified_Metazoa	0.02	unclassified_Metazoa	0.02	unclassified_Metazoa	0.02	unclassified_Metazoa	0.02	unclassified_Metazoa_sp	0.02	0	0	0	0	0	0	0	0	0	0	0	0	0	0	0	0	0	0	0	0	0	0	0	0	9	0	0	0	0	0	0	0	0	0
d303da855187e889e2bbbd5153948933e4f9af81	#N/A	Metazoa	0.88	unclassified_Metazoa	0.55	unclassified_Metazoa	0.17	unclassified_Metazoa	0.07	unclassified_Metazoa	0.05	unclassified_Metazoa	0.02	unclassified_Metazoa_sp	0.02	0	0	0	0	0	0	0	0	0	0	0	0	0	0	0	0	0	0	0	0	0	0	0	0	0	2	0	0	0	0	0	0	0	0
db87b0d6e12d7158d65debd229639c448697005d	#N/A	Metazoa	0.82	unclassified_Metazoa	0.73	unclassified_Metazoa	0.66	unclassified_Metazoa	0.19	unclassified_Metazoa	0.08	unclassified_Metazoa	0.02	unclassified_Metazoa_sp	0.02	0	0	0	0	0	0	0	0	0	0	0	0	0	0	0	0	0	0	0	0	0	0	0	0	0	0	0	0	0	0	0	0	0	0
ddda17e3e79bbd232b0ad525a37ee8bd7943ab02	#N/A	Metazoa	0.84	unclassified_Metazoa	0.52	unclassified_Metazoa	0.5	unclassified_Metazoa	0.15	unclassified_Metazoa	0.04	unclassified_Metazoa	0.02	unclassified_Metazoa_sp	0.02	0	0	0	0	0	0	2	2	0	0	0	0	0	0	0	0	0	0	0	0	0	0	0	0	0	0	0	0	0	0	0	0	0	0
def19646706350fba085454b36d74555f589de66	#N/A	Metazoa	0.89	unclassified_Metazoa	0.42	unclassified_Metazoa	0.26	unclassified_Metazoa	0.02	unclassified_Metazoa	0.02	unclassified_Metazoa	0.02	unclassified_Metazoa_sp	0.02	0	0	0	0	0	0	0	0	0	0	0	0	0	0	0	0	0	0	0	0	0	0	0	0	0	0	0	0	0	0	42	0	0	0
e501710110d9a8c8f0216a14526cde2cfd8edd58	#N/A	Metazoa	0.81	unclassified_Metazoa	0.44	unclassified_Metazoa	0.23	unclassified_Metazoa	0.04	unclassified_Metazoa	0.03	unclassified_Metazoa	0.02	unclassified_Metazoa_sp	0.02	0	0	0	0	0	0	0	0	0	0	0	0	0	0	0	0	0	0	0	0	0	0	0	0	0	0	0	0	0	0	0	3	0	0
f53e910b20525b8157d591604a8f355216dd0f3b	#N/A	Metazoa	0.82	unclassified_Metazoa	0.55	unclassified_Metazoa	0.44	unclassified_Metazoa	0.24	unclassified_Metazoa	0.17	unclassified_Metazoa	0.02	unclassified_Metazoa_sp	0.02	0	0	0	0	0	0	0	0	0	0	0	0	0	0	0	0	0	0	0	0	0	0	0	0	0	0	0	0	0	0	2	0	0	0
fa727b594d23dc245e5b7b535efa7418694b07d0	#N/A	Metazoa	0.83	unclassified_Metazoa	0.71	unclassified_Metazoa	0.59	unclassified_Metazoa	0.2	unclassified_Metazoa	0.07	unclassified_Metazoa	0.02	unclassified_Metazoa_sp	0.02	0	0	0	0	0	0	0	0	0	0	0	0	0	0	0	0	0	0	0	0	0	0	0	0	0	0	0	0	0	0	0	0	2	0
fc52774b7b12713e661f229d08b2f988fe6013f8	#N/A	Metazoa	0.95	unclassified_Metazoa	0.07	unclassified_Metazoa	0.05	unclassified_Metazoa	0.02	unclassified_Metazoa	0.02	unclassified_Metazoa	0.02	unclassified_Metazoa_sp	0.02	0	0	0	0	0	0	0	0	18	0	0	0	0	0	0	0	0	0	0	0	0	0	0	0	0	0	0	0	0	0	0	0	0	0
fdc483c196658aec99f73ee5e206547ad826b207	#N/A	Metazoa	0.87	unclassified_Metazoa	0.26	unclassified_Metazoa	0.06	unclassified_Metazoa	0.02	unclassified_Metazoa	0.02	unclassified_Metazoa	0.02	unclassified_Metazoa_sp	0.02	0	0	0	0	0	0	0	0	0	0	0	0	0	0	0	0	0	0	0	0	0	0	0	0	0	0	0	0	0	0	0	0	0	2
ffbe46593ac67479628b4430937dbb40f7e3e256	#N/A	Metazoa	0.8	unclassified_Metazoa	0.62	unclassified_Metazoa	0.58	unclassified_Metazoa	0.41	unclassified_Metazoa	0.02	unclassified_Metazoa	0.02	unclassified_Metazoa_sp	0.02	0	0	0	0	0	0	0	0	0	0	0	0	0	0	0	0	0	0	0	0	2	0	0	0	0	0	0	0	0	0	0	0	0	0
093708c7d603cde56c346e9c2c5bfeceb6c5481c	#N/A	Metazoa	0.88	unclassified_Metazoa	0.45	unclassified_Metazoa	0.25	unclassified_Metazoa	0.18	unclassified_Metazoa	0.02	unclassified_Metazoa	0.02	unclassified_Metazoa_sp	0.01	0	0	0	0	0	0	0	0	0	0	0	0	0	0	0	0	0	0	0	0	11	0	0	0	0	0	0	0	0	0	0	0	0	0
2a1de93b2c5942280e7034120cc698c14a4cf26d	#N/A	Metazoa	0.95	unclassified_Metazoa	0.7	unclassified_Metazoa	0.54	unclassified_Metazoa	0.13	unclassified_Metazoa	0.08	unclassified_Metazoa	0.02	unclassified_Metazoa_sp	0.01	0	0	0	0	0	0	0	0	0	0	0	0	0	0	0	0	0	0	0	0	0	0	0	0	0	0	0	0	8	0	0	0	0	0
5098455d13617cc4344f1150230da31b784cf08e	#N/A	Metazoa	0.99	unclassified_Metazoa	0.46	unclassified_Metazoa	0.28	unclassified_Metazoa	0.02	unclassified_Metazoa	0.02	unclassified_Metazoa	0.02	unclassified_Metazoa_sp	0.01	0	0	0	0	0	0	0	0	0	0	0	0	0	0	0	0	0	159	0	0	0	0	0	0	0	0	0	0	0	7	0	0	0	0
7ba84db0ce23d903e6481c2eda1e9b2f88636125	#N/A	Metazoa	0.86	unclassified_Metazoa	0.49	unclassified_Metazoa	0.38	unclassified_Metazoa	0.21	unclassified_Metazoa	0.11	unclassified_Metazoa	0.02	unclassified_Metazoa_sp	0.01	0	0	0	0	0	0	0	0	0	0	0	0	0	0	0	0	0	0	0	0	0	0	0	0	0	0	0	0	0	0	0	0	0	0
d294e8e5f092a3593a16c99c145f1505c598e896	#N/A	Metazoa	0.9	unclassified_Metazoa	0.77	unclassified_Metazoa	0.29	unclassified_Metazoa	0.22	unclassified_Metazoa	0.07	unclassified_Metazoa	0.02	unclassified_Metazoa_sp	0.01	0	0	0	0	0	0	0	0	0	0	0	0	0	0	0	0	0	0	0	2	0	0	0	0	0	0	0	0	0	0	0	0	0	0
e4f2616a80e4561b5cc1a46790be3dcbf2f023b3	#N/A	Metazoa	0.8	unclassified_Metazoa	0.63	unclassified_Metazoa	0.55	unclassified_Metazoa	0.19	unclassified_Metazoa	0.08	unclassified_Metazoa	0.02	unclassified_Metazoa_sp	0.01	0	0	0	0	0	0	0	0	0	0	0	0	0	0	0	0	0	3	0	0	0	0	0	0	0	0	0	0	0	0	0	0	0	0
328fe4f85723f1ec6900e43243caea5e3c27fab4	#N/A	Metazoa	0.96	unclassified_Metazoa	0.4	unclassified_Metazoa	0.23	unclassified_Metazoa	0.05	unclassified_Metazoa	0.03	unclassified_Metazoa	0.02	unclassified_Metazoa_sp	0	0	0	0	0	0	0	0	0	0	0	0	0	0	0	0	0	0	0	0	0	3	0	0	0	0	0	0	0	0	0	0	0	0	0
706018deefee585538dc34da49ab47a993286ffd	#N/A	Metazoa	0.9	unclassified_Metazoa	0.57	unclassified_Metazoa	0.34	unclassified_Metazoa	0.03	unclassified_Metazoa	0.02	unclassified_Metazoa	0.02	unclassified_Metazoa_sp	0	0	0	0	0	0	0	0	0	0	0	0	0	0	0	0	0	0	0	0	0	0	0	2	0	0	0	0	0	0	0	0	0	0	0
72045c98a54a2c79b37ac0d05d5bf44fc91c32e9	#N/A	Metazoa	0.8	unclassified_Metazoa	0.53	unclassified_Metazoa	0.3	unclassified_Metazoa	0.09	unclassified_Metazoa	0.02	unclassified_Metazoa	0.02	unclassified_Metazoa_sp	0	0	0	0	0	0	4	0	0	0	0	0	0	0	0	0	0	0	0	0	0	0	0	0	0	0	0	0	0	0	0	0	0	0	0
a733ca8e286af3facb783f33f57a2ebfd59b1fe4	#N/A	Metazoa	1	unclassified_Metazoa	0.67	unclassified_Metazoa	0.58	unclassified_Metazoa	0.32	unclassified_Metazoa	0.03	unclassified_Metazoa	0.02	unclassified_Metazoa_sp	0	0	7	0	0	0	0	0	2	0	0	0	0	0	7	4	0	10	0	0	11	0	0	0	0	0	0	0	0	2	39	0	0	0	0
bc16d7c763c2cb67bc4f5a8ef49f8c554e80550c	#N/A	Metazoa	0.81	unclassified_Metazoa	0.52	unclassified_Metazoa	0.33	unclassified_Metazoa	0.07	unclassified_Metazoa	0.02	unclassified_Metazoa	0.02	unclassified_Metazoa_sp	0	0	0	0	0	0	0	0	0	0	0	0	0	0	0	0	0	0	0	0	0	0	0	0	0	0	0	0	0	0	0	2	0	0	0
d82aa927e4a897ffbed44103a23f443a9d14d6a6	#N/A	Metazoa	0.9	unclassified_Metazoa	0.69	unclassified_Metazoa	0.51	unclassified_Metazoa	0.05	unclassified_Metazoa	0.02	unclassified_Metazoa	0.02	unclassified_Metazoa_sp	0	0	2	0	0	0	0	0	0	0	0	0	0	0	0	0	0	0	0	0	0	0	0	0	0	0	0	0	0	0	0	0	0	0	0
efa9b96837f4fcdeedc601c556c091b598f6e7ff	#N/A	Metazoa	0.95	unclassified_Metazoa	0.75	unclassified_Metazoa	0.22	unclassified_Metazoa	0.15	unclassified_Metazoa	0.03	unclassified_Metazoa	0.02	unclassified_Metazoa_sp	0	0	0	0	0	0	0	0	0	0	0	0	0	0	0	0	0	0	0	0	0	0	0	0	0	0	0	0	0	0	0	0	0	0	0
012a93a938e951b4a471aa4cda3559f5d7409d38	#N/A	Metazoa	0.94	unclassified_Metazoa	0.76	unclassified_Metazoa	0.66	unclassified_Metazoa	0.24	unclassified_Metazoa	0.01	unclassified_Metazoa	0.01	unclassified_Metazoa_sp	0.01	0	0	0	0	2	0	0	0	0	0	0	0	0	0	0	0	0	0	0	0	0	0	0	0	0	0	0	0	0	0	0	0	0	0
02c47fd8cb951b96ec4bf800e301d078d186a93f	#N/A	Metazoa	0.98	unclassified_Metazoa	0.77	unclassified_Metazoa	0.13	unclassified_Metazoa	0.09	unclassified_Metazoa	0.04	unclassified_Metazoa	0.01	unclassified_Metazoa_sp	0.01	0	0	0	0	3	0	0	0	0	0	0	0	0	0	0	0	0	0	0	0	0	0	0	0	0	0	0	0	0	15	0	0	0	0
048ad0adc5481c7e4f72ac84f2c30f41ff8615b8	#N/A	Metazoa	0.87	unclassified_Metazoa	0.76	unclassified_Metazoa	0.6	unclassified_Metazoa	0.07	unclassified_Metazoa	0.02	unclassified_Metazoa	0.01	unclassified_Metazoa_sp	0.01	0	0	0	0	0	0	0	0	0	0	0	0	0	0	0	0	0	0	0	0	0	0	2	0	0	0	0	0	0	0	0	0	0	0
08c4882fbe13de46587c2a986c856d9b58414dfa	#N/A	Metazoa	0.97	unclassified_Metazoa	0.6	unclassified_Metazoa	0.06	unclassified_Metazoa	0.03	unclassified_Metazoa	0.02	unclassified_Metazoa	0.01	unclassified_Metazoa_sp	0.01	179	16	0	86	60	0	21	126	0	0	0	180	20	0	0	0	38	1316	260	0	0	233	1683	0	0	0	0	0	0	55	0	0	0	0
0beff963d4af7c52fff3ffb213eebade5fc000ca	#N/A	Metazoa	0.81	unclassified_Metazoa	0.12	unclassified_Metazoa	0.08	unclassified_Metazoa	0.04	unclassified_Metazoa	0.04	unclassified_Metazoa	0.01	unclassified_Metazoa_sp	0.01	0	0	0	0	0	0	0	0	0	0	0	0	0	0	0	0	0	0	0	0	0	0	0	0	0	0	0	0	0	0	24	0	0	0
0bf7bccc4f7ce73fc9338b923d9ba8a9414d35b4	#N/A	Metazoa	0.85	unclassified_Metazoa	0.64	unclassified_Metazoa	0.37	unclassified_Metazoa	0.3	unclassified_Metazoa	0.19	unclassified_Metazoa	0.01	unclassified_Metazoa_sp	0.01	0	0	0	0	0	0	0	0	0	0	0	0	0	0	0	0	0	0	0	0	0	0	0	0	0	0	0	0	4	0	0	0	0	0
0d0f2987c1de5e45ba9e9f68bc01b1038448162a	#N/A	Metazoa	0.81	unclassified_Metazoa	0.71	unclassified_Metazoa	0.63	unclassified_Metazoa	0.12	unclassified_Metazoa	0.03	unclassified_Metazoa	0.01	unclassified_Metazoa_sp	0.01	0	0	0	0	0	0	0	0	0	0	0	0	0	0	0	0	0	0	0	0	0	0	0	0	0	0	0	0	0	0	0	0	0	0
105dd3da85be04a2dfafb2ff5121d9f20afea440	#N/A	Metazoa	0.91	unclassified_Metazoa	0.08	unclassified_Metazoa	0.08	unclassified_Metazoa	0.05	unclassified_Metazoa	0.04	unclassified_Metazoa	0.01	unclassified_Metazoa_sp	0.01	0	0	0	0	0	0	0	0	0	0	0	0	0	0	0	0	0	0	0	0	0	0	0	0	0	0	0	0	0	0	0	0	0	2
125df5aeeed994a28daeddda4d056b0883c425ee	#N/A	Metazoa	0.8	unclassified_Metazoa	0.27	unclassified_Metazoa	0.03	unclassified_Metazoa	0.01	unclassified_Metazoa	0.01	unclassified_Metazoa	0.01	unclassified_Metazoa_sp	0.01	0	0	0	0	0	0	0	0	0	0	0	0	0	0	0	0	0	0	0	0	0	0	0	0	0	0	0	0	0	0	0	0	0	0
135689e2e82dac4bd3666b2bfa646713827f5810	#N/A	Metazoa	0.82	unclassified_Metazoa	0.58	unclassified_Metazoa	0.11	unclassified_Metazoa	0.02	unclassified_Metazoa	0.01	unclassified_Metazoa	0.01	unclassified_Metazoa_sp	0.01	0	0	0	0	0	0	0	0	14	0	25	0	29	0	0	0	0	34	0	0	0	0	0	0	0	0	0	0	0	0	46	12	23	82
15c89fcb98fe3fa3530aa9e4a7eb928c0b7b4fe3	#N/A	Metazoa	0.82	unclassified_Metazoa	0.07	unclassified_Metazoa	0.02	unclassified_Metazoa	0.01	unclassified_Metazoa	0.01	unclassified_Metazoa	0.01	unclassified_Metazoa_sp	0.01	0	0	0	0	0	0	0	0	0	0	0	0	0	0	0	0	0	0	0	0	0	0	0	0	0	0	0	0	0	0	10	0	0	0
15e8a5435373cbc1c341ad93eec2378f5f97593a	#N/A	Metazoa	0.87	unclassified_Metazoa	0.66	unclassified_Metazoa	0.18	unclassified_Metazoa	0.08	unclassified_Metazoa	0.01	unclassified_Metazoa	0.01	unclassified_Metazoa_sp	0.01	0	0	0	0	0	0	0	0	0	0	0	0	0	0	0	0	0	0	0	0	0	0	0	0	0	0	0	0	0	0	0	0	0	0
18064c93de29f080b456229b36f64285ae446078	#N/A	Metazoa	0.84	unclassified_Metazoa	0.45	unclassified_Metazoa	0.28	unclassified_Metazoa	0.16	unclassified_Metazoa	0.01	unclassified_Metazoa	0.01	unclassified_Metazoa_sp	0.01	0	0	0	0	0	0	0	0	0	0	0	0	0	0	0	0	0	0	0	0	0	44	0	0	0	0	0	0	0	0	0	0	0	0
1bf6c98b61b0417dd0f3b4ea128d17f0bdbbf804	#N/A	Metazoa	0.99	unclassified_Metazoa	0.4	unclassified_Metazoa	0.33	unclassified_Metazoa	0.07	unclassified_Metazoa	0.03	unclassified_Metazoa	0.01	unclassified_Metazoa_sp	0.01	0	0	0	0	0	0	0	0	0	0	0	0	0	7	0	0	0	0	0	0	0	0	0	0	0	0	0	0	0	0	0	0	0	0
1f42b96ac936b4a50c2337ba2bb27a2e259521ad	#N/A	Metazoa	0.83	unclassified_Metazoa	0.03	unclassified_Metazoa	0.03	unclassified_Metazoa	0.03	unclassified_Metazoa	0.01	unclassified_Metazoa	0.01	unclassified_Metazoa_sp	0.01	0	0	0	0	0	0	0	0	0	0	0	0	0	0	0	0	0	0	0	0	0	0	0	0	0	0	0	0	0	0	0	0	0	0
1fae763d6ad827ad001034f5ca6df3c503f4f8ac	#N/A	Metazoa	0.97	unclassified_Metazoa	0.74	unclassified_Metazoa	0.45	unclassified_Metazoa	0.1	unclassified_Metazoa	0.05	unclassified_Metazoa	0.01	unclassified_Metazoa_sp	0.01	0	0	0	0	0	0	0	0	0	0	0	0	0	0	0	0	2	0	0	0	0	0	0	0	0	0	0	0	0	10	0	0	0	0
21331e1eaa058c1c9d16642879a7c7cb048c0448	#N/A	Metazoa	1	unclassified_Metazoa	0.75	unclassified_Metazoa	0.55	unclassified_Metazoa	0.13	unclassified_Metazoa	0.11	unclassified_Metazoa	0.01	unclassified_Metazoa_sp	0.01	0	0	0	0	0	0	0	0	0	0	0	0	0	0	0	0	0	0	0	0	0	0	0	0	0	0	0	0	0	0	0	0	0	0
242e26476d945a1a527fd8ecded1630fbe3e0f92	#N/A	Metazoa	0.8	unclassified_Metazoa	0.07	unclassified_Metazoa	0.07	unclassified_Metazoa	0.05	unclassified_Metazoa	0.02	unclassified_Metazoa	0.01	unclassified_Metazoa_sp	0.01	0	0	0	0	0	0	0	0	0	0	0	0	0	0	0	0	0	0	0	0	0	0	0	0	0	0	0	0	0	0	0	0	0	0
245209cebc4d71e5f3e49b9198dbe4567f132d77	#N/A	Metazoa	0.85	unclassified_Metazoa	0.06	unclassified_Metazoa	0.06	unclassified_Metazoa	0.06	unclassified_Metazoa	0.01	unclassified_Metazoa	0.01	unclassified_Metazoa_sp	0.01	0	0	0	0	0	0	0	0	0	0	0	0	0	0	0	0	0	0	0	0	0	0	0	0	0	0	0	0	0	0	0	0	0	0
24d4d95b0246796766fd6df182b2bca481fd11ef	#N/A	Metazoa	0.97	unclassified_Metazoa	0.41	unclassified_Metazoa	0.34	unclassified_Metazoa	0.15	unclassified_Metazoa	0.01	unclassified_Metazoa	0.01	unclassified_Metazoa_sp	0.01	0	0	0	0	0	0	0	0	0	0	0	0	0	0	0	0	0	0	2	0	0	0	0	0	0	0	0	0	0	0	0	0	0	0
25d7245cff3bae0c832ce3ef93dde78bee961e40	#N/A	Metazoa	0.9	unclassified_Metazoa	0.65	unclassified_Metazoa	0.5	unclassified_Metazoa	0.15	unclassified_Metazoa	0.01	unclassified_Metazoa	0.01	unclassified_Metazoa_sp	0.01	0	0	0	0	0	0	0	0	0	0	0	0	0	0	0	0	0	8	3	2	0	0	13	0	0	0	0	0	0	4	8	0	0	0
29433822e89b62101593b2a6ba61a0a70a71a145	#N/A	Metazoa	0.9	unclassified_Metazoa	0.38	unclassified_Metazoa	0.28	unclassified_Metazoa	0.13	unclassified_Metazoa	0.03	unclassified_Metazoa	0.01	unclassified_Metazoa_sp	0.01	0	0	0	0	0	0	0	0	0	0	0	0	0	0	0	0	0	0	0	0	0	0	0	0	0	0	0	5	0	0	0	0	0	0
316867b82db99a81269c5348d1239a9becbef43b	#N/A	Metazoa	0.88	unclassified_Metazoa	0.57	unclassified_Metazoa	0.37	unclassified_Metazoa	0.19	unclassified_Metazoa	0.05	unclassified_Metazoa	0.01	unclassified_Metazoa_sp	0.01	0	0	0	0	0	0	0	0	0	0	0	0	0	0	0	0	0	0	0	0	0	0	0	4	0	0	0	0	0	0	0	0	0	0
33e525d227aa0b74c0eeeaa9e0e508019bd840a2	#N/A	Metazoa	0.89	unclassified_Metazoa	0.68	unclassified_Metazoa	0.44	unclassified_Metazoa	0.22	unclassified_Metazoa	0.11	unclassified_Metazoa	0.01	unclassified_Metazoa_sp	0.01	0	0	0	0	0	0	0	0	0	0	0	0	0	0	0	0	2	0	0	0	0	0	0	0	0	0	0	0	0	0	0	0	0	0
3425038f14884e7c72151111a7a833ce5eeff654	#N/A	Metazoa	0.93	unclassified_Metazoa	0.75	unclassified_Metazoa	0.5	unclassified_Metazoa	0.18	unclassified_Metazoa	0.09	unclassified_Metazoa	0.01	unclassified_Metazoa_sp	0.01	0	0	0	0	0	0	0	0	0	0	0	0	0	0	0	0	0	0	0	0	0	0	0	0	0	0	2	0	2	4	103	0	4	4
3494a7f46b4781a094daea209babc921f5140ab9	#N/A	Metazoa	0.81	unclassified_Metazoa	0.54	unclassified_Metazoa	0.42	unclassified_Metazoa	0.12	unclassified_Metazoa	0.04	unclassified_Metazoa	0.01	unclassified_Metazoa_sp	0.01	0	0	0	0	0	0	0	0	0	0	0	3	0	0	0	0	0	0	0	0	0	0	0	0	0	2	0	0	0	0	0	0	0	0
3d24b0770fa843b7b720296a3be803056323019a	#N/A	Metazoa	0.87	unclassified_Metazoa	0.65	unclassified_Metazoa	0.42	unclassified_Metazoa	0.01	unclassified_Metazoa	0.01	unclassified_Metazoa	0.01	unclassified_Metazoa_sp	0.01	0	0	0	0	0	0	0	0	0	0	0	0	0	0	0	0	0	0	0	0	0	0	0	0	0	0	0	0	0	0	0	0	3	0
3db6144a3607306c5c44152b053b1a2f3a1c7f77	#N/A	Metazoa	0.84	unclassified_Metazoa	0.16	unclassified_Metazoa	0.09	unclassified_Metazoa	0.04	unclassified_Metazoa	0.04	unclassified_Metazoa	0.01	unclassified_Metazoa_sp	0.01	0	0	0	0	0	0	0	0	0	0	0	0	0	0	0	0	0	0	0	0	0	0	8	0	0	0	0	0	0	0	0	0	0	0
424944f0255f0e2c811f4504876ebe73471bd41d	#N/A	Metazoa	0.84	unclassified_Metazoa	0.68	unclassified_Metazoa	0.56	unclassified_Metazoa	0.12	unclassified_Metazoa	0.01	unclassified_Metazoa	0.01	unclassified_Metazoa_sp	0.01	0	0	0	0	0	0	0	0	0	0	0	0	0	0	0	0	0	0	0	0	0	0	0	0	0	0	0	0	0	0	0	0	0	0
4260bd79107c13114e6807ae96e4db86e0f387f3	#N/A	Metazoa	0.87	unclassified_Metazoa	0.05	unclassified_Metazoa	0.05	unclassified_Metazoa	0.02	unclassified_Metazoa	0.01	unclassified_Metazoa	0.01	unclassified_Metazoa_sp	0.01	0	0	0	3	0	0	0	0	0	0	0	0	0	0	4	0	0	0	0	0	0	0	0	0	0	0	0	0	0	0	0	0	0	0
49b53a140e01a61c62a4eb721437a695c3475491	#N/A	Metazoa	0.87	unclassified_Metazoa	0.77	unclassified_Metazoa	0.66	unclassified_Metazoa	0.21	unclassified_Metazoa	0.03	unclassified_Metazoa	0.01	unclassified_Metazoa_sp	0.01	0	0	0	0	0	0	0	0	0	0	0	0	0	0	0	0	2	0	0	0	0	0	0	0	0	0	0	0	0	0	0	0	0	0
4a3781fa6f1f019ee14bd18a53b2b0580bb42e4e	#N/A	Metazoa	0.84	unclassified_Metazoa	0.68	unclassified_Metazoa	0.62	unclassified_Metazoa	0.17	unclassified_Metazoa	0.05	unclassified_Metazoa	0.01	unclassified_Metazoa_sp	0.01	0	0	0	0	0	0	0	0	0	0	0	0	0	0	0	0	0	0	0	0	0	0	0	0	0	0	0	0	0	0	0	0	0	0
4e299bb6bac020e93a322419c590ef2348a0f46d	#N/A	Metazoa	0.92	unclassified_Metazoa	0.53	unclassified_Metazoa	0.44	unclassified_Metazoa	0.02	unclassified_Metazoa	0.02	unclassified_Metazoa	0.01	unclassified_Metazoa_sp	0.01	0	0	0	0	0	0	0	0	0	0	0	0	0	0	0	0	0	0	0	0	0	0	0	0	0	0	0	0	0	0	0	0	0	0
4ec0e781e4aa5a87bf7b52bf60d17211fad91f6f	#N/A	Metazoa	0.83	unclassified_Metazoa	0.57	unclassified_Metazoa	0.35	unclassified_Metazoa	0.08	unclassified_Metazoa	0.04	unclassified_Metazoa	0.01	unclassified_Metazoa_sp	0.01	0	0	0	0	0	0	0	0	0	0	0	0	0	0	0	0	0	0	0	0	0	0	0	0	0	0	0	0	0	0	0	0	0	0
55eb90a2d1c760a38fa095876953c614cf55ef3a	#N/A	Metazoa	0.85	unclassified_Metazoa	0.35	unclassified_Metazoa	0.14	unclassified_Metazoa	0.01	unclassified_Metazoa	0.01	unclassified_Metazoa	0.01	unclassified_Metazoa_sp	0.01	0	0	0	0	0	0	0	0	0	0	0	0	0	0	0	0	0	0	0	0	0	0	0	0	0	0	0	0	0	0	0	0	0	0
562c453933d53a49e24b2a9d8b141903951db3fd	#N/A	Metazoa	0.94	unclassified_Metazoa	0.04	unclassified_Metazoa	0.03	unclassified_Metazoa	0.01	unclassified_Metazoa	0.01	unclassified_Metazoa	0.01	unclassified_Metazoa_sp	0.01	0	0	0	0	0	2	0	0	2	0	26	0	0	0	0	0	0	0	0	2	0	0	0	0	0	0	0	0	0	0	0	0	0	0
582c8cb5572cd49ff752f303361a6b1c2135afc4	#N/A	Metazoa	0.94	unclassified_Metazoa	0.62	unclassified_Metazoa	0.52	unclassified_Metazoa	0.08	unclassified_Metazoa	0.02	unclassified_Metazoa	0.01	unclassified_Metazoa_sp	0.01	0	0	0	0	0	0	0	0	0	0	0	0	0	0	0	0	0	0	0	0	0	0	0	0	0	0	0	0	0	0	0	0	0	0
5b7df260b32f6b34005aa1538c07a5c46809c20a	#N/A	Metazoa	0.81	unclassified_Metazoa	0.57	unclassified_Metazoa	0.43	unclassified_Metazoa	0.14	unclassified_Metazoa	0.03	unclassified_Metazoa	0.01	unclassified_Metazoa_sp	0.01	0	0	0	0	0	0	0	0	0	0	0	0	0	0	0	0	0	0	0	0	0	4	0	0	0	0	0	0	0	0	0	0	0	0
5d254bb9c1831356f845432de2451c8fb1ebc54e	#N/A	Metazoa	0.83	unclassified_Metazoa	0.32	unclassified_Metazoa	0.06	unclassified_Metazoa	0.06	unclassified_Metazoa	0.01	unclassified_Metazoa	0.01	unclassified_Metazoa_sp	0.01	0	0	0	0	0	0	0	0	0	0	0	0	0	0	0	0	0	0	0	33	0	0	0	0	0	0	0	0	0	0	0	0	0	0
61a0abb5f55eab6016112ef537ec83299db79e15	#N/A	Metazoa	0.92	unclassified_Metazoa	0.78	unclassified_Metazoa	0.54	unclassified_Metazoa	0.03	unclassified_Metazoa	0.02	unclassified_Metazoa	0.01	unclassified_Metazoa_sp	0.01	0	0	0	0	0	0	0	0	0	0	0	0	0	0	0	0	0	0	0	0	0	0	0	0	0	0	0	0	0	0	0	0	0	0
6219ad15895a1ede810fa34e0f6d15fedd3bbf0d	#N/A	Metazoa	1	unclassified_Metazoa	0.68	unclassified_Metazoa	0.09	unclassified_Metazoa	0.06	unclassified_Metazoa	0.05	unclassified_Metazoa	0.01	unclassified_Metazoa_sp	0.01	0	0	0	0	0	0	0	0	0	0	0	0	0	0	0	0	0	0	0	0	0	0	0	0	0	0	0	0	0	0	0	0	0	0
628b599ab5fd230ffa15a16e0d7701c4bc001123	#N/A	Metazoa	0.83	unclassified_Metazoa	0.76	unclassified_Metazoa	0.58	unclassified_Metazoa	0.18	unclassified_Metazoa	0.01	unclassified_Metazoa	0.01	unclassified_Metazoa_sp	0.01	0	0	0	0	0	0	0	0	0	0	0	0	0	0	0	0	0	0	0	0	0	0	0	0	0	0	0	0	0	0	0	0	2	0
628beda2f2a816be5cb6c8bcea50e924c27cc9b4	#N/A	Metazoa	0.83	unclassified_Metazoa	0.06	unclassified_Metazoa	0.06	unclassified_Metazoa	0.05	unclassified_Metazoa	0.05	unclassified_Metazoa	0.01	unclassified_Metazoa_sp	0.01	0	0	0	0	0	0	0	3	0	0	0	0	0	0	0	0	0	0	0	0	378	0	0	0	0	0	0	0	0	0	0	0	0	0
65b78bea9bfd26fa32d9585e3a28fcf2347300e3	#N/A	Metazoa	0.83	unclassified_Metazoa	0.58	unclassified_Metazoa	0.39	unclassified_Metazoa	0.1	unclassified_Metazoa	0.05	unclassified_Metazoa	0.01	unclassified_Metazoa_sp	0.01	0	0	0	0	0	0	0	0	0	0	0	0	0	0	0	0	0	0	0	0	0	0	0	0	0	0	0	0	0	0	5	0	0	0
65cdc549f046ecf5bf427834dfe805a3ceacd23d	#N/A	Metazoa	0.8	unclassified_Metazoa	0.6	unclassified_Metazoa	0.3	unclassified_Metazoa	0.07	unclassified_Metazoa	0.01	unclassified_Metazoa	0.01	unclassified_Metazoa_sp	0.01	0	0	0	0	0	0	0	0	0	0	0	0	0	0	0	0	0	0	2	0	0	0	0	0	0	0	0	0	0	0	0	0	0	0
66a635900a46dd5379b5d31aa4241020b04da719	#N/A	Metazoa	0.93	unclassified_Metazoa	0.74	unclassified_Metazoa	0.49	unclassified_Metazoa	0.06	unclassified_Metazoa	0.05	unclassified_Metazoa	0.01	unclassified_Metazoa_sp	0.01	0	0	0	0	2	0	0	0	0	0	0	0	0	0	0	0	0	0	0	0	0	0	0	0	0	0	0	0	0	0	0	0	0	0
6856260cadf3d6404ce16b98b8d93622d64260df	#N/A	Metazoa	0.98	unclassified_Metazoa	0.75	unclassified_Metazoa	0.54	unclassified_Metazoa	0.14	unclassified_Metazoa	0.03	unclassified_Metazoa	0.01	unclassified_Metazoa_sp	0.01	0	0	0	0	0	0	0	0	0	0	0	0	0	0	0	0	0	0	0	0	55	0	0	0	0	0	0	0	0	4	0	0	0	0
6a2111f9aa121987b54293db7d70fbbfe779820e	#N/A	Metazoa	0.88	unclassified_Metazoa	0.01	unclassified_Metazoa	0.01	unclassified_Metazoa	0.01	unclassified_Metazoa	0.01	unclassified_Metazoa	0.01	unclassified_Metazoa_sp	0.01	0	0	0	0	0	0	0	0	0	0	0	0	0	0	0	0	0	0	0	0	4	0	0	0	0	0	0	0	0	0	0	0	0	0
6e33965fb91711664cc55406e196882599d970fe	#N/A	Metazoa	0.86	unclassified_Metazoa	0.52	unclassified_Metazoa	0.26	unclassified_Metazoa	0.01	unclassified_Metazoa	0.01	unclassified_Metazoa	0.01	unclassified_Metazoa_sp	0.01	0	0	0	0	0	0	0	0	0	4	0	0	0	0	0	0	0	0	0	0	0	0	0	0	0	0	0	0	0	0	0	0	0	0
6ef6f5b0b3e10428bc25573083b1750b41f02b2a	#N/A	Metazoa	0.8	unclassified_Metazoa	0.19	unclassified_Metazoa	0.18	unclassified_Metazoa	0.06	unclassified_Metazoa	0.01	unclassified_Metazoa	0.01	unclassified_Metazoa_sp	0.01	0	0	0	0	0	0	0	0	0	5	0	0	0	0	0	0	0	0	0	0	0	0	0	0	0	0	0	0	0	0	0	0	0	0
7b637c574102d57900fb063c2e4c6aa8fb6c2154	#N/A	Metazoa	1	unclassified_Metazoa	0.78	unclassified_Metazoa	0.51	unclassified_Metazoa	0.13	unclassified_Metazoa	0.01	unclassified_Metazoa	0.01	unclassified_Metazoa_sp	0.01	0	0	0	0	0	0	0	0	0	0	0	0	0	0	0	0	0	0	0	0	0	0	0	0	0	0	0	0	0	0	0	0	0	0
7fb0f01e08487081ee349901e8a41fc94ea084c7	#N/A	Metazoa	0.82	unclassified_Metazoa	0.73	unclassified_Metazoa	0.44	unclassified_Metazoa	0.08	unclassified_Metazoa	0.01	unclassified_Metazoa	0.01	unclassified_Metazoa_sp	0.01	0	0	0	0	0	0	0	0	0	0	0	0	0	0	0	0	0	0	0	0	0	0	0	0	0	0	0	0	0	0	0	0	0	0
80e74a34a8a4ff70e152709437d8b2952aeda461	#N/A	Metazoa	0.88	unclassified_Metazoa	0.75	unclassified_Metazoa	0.6	unclassified_Metazoa	0.14	unclassified_Metazoa	0.01	unclassified_Metazoa	0.01	unclassified_Metazoa_sp	0.01	0	0	0	0	0	0	2	0	0	0	0	0	0	0	0	0	0	0	0	0	0	0	0	0	0	0	0	0	0	0	0	0	0	0
83adb670dd8b312b40909b30cc68dd6042852049	#N/A	Metazoa	0.86	unclassified_Metazoa	0.78	unclassified_Metazoa	0.28	unclassified_Metazoa	0.02	unclassified_Metazoa	0.01	unclassified_Metazoa	0.01	unclassified_Metazoa_sp	0.01	0	0	0	0	0	0	0	0	0	0	0	0	0	0	0	0	0	0	0	0	0	0	8	0	0	0	0	0	0	0	0	0	0	0
8402901bb3407432b0532f69042e6968a48e50d0	#N/A	Metazoa	0.85	unclassified_Metazoa	0.73	unclassified_Metazoa	0.09	unclassified_Metazoa	0.06	unclassified_Metazoa	0.02	unclassified_Metazoa	0.01	unclassified_Metazoa_sp	0.01	0	0	0	0	0	0	0	0	0	0	0	0	0	0	0	0	0	0	0	0	0	0	0	0	0	0	0	0	0	0	0	0	5	0
865b1782f89037c62f6d5ee6601990bb5cf1eb1f	#N/A	Metazoa	0.9	unclassified_Metazoa	0.52	unclassified_Metazoa	0.4	unclassified_Metazoa	0.11	unclassified_Metazoa	0.01	unclassified_Metazoa	0.01	unclassified_Metazoa_sp	0.01	0	0	0	0	0	0	0	0	0	0	0	0	0	0	0	0	0	0	19	0	0	0	0	0	0	0	0	0	0	0	0	0	0	0
89170426182ef5031f24a15b669b24643eca60d0	#N/A	Metazoa	0.89	unclassified_Metazoa	0.77	unclassified_Metazoa	0.57	unclassified_Metazoa	0.35	unclassified_Metazoa	0.01	unclassified_Metazoa	0.01	unclassified_Metazoa_sp	0.01	0	0	0	0	0	0	0	0	0	0	0	0	0	0	0	0	0	0	0	0	0	0	3	0	0	0	0	0	0	0	0	0	0	0
9d3090ed1ad9ef6bb80d4c3bb1d53c18cb90f803	#N/A	Metazoa	0.85	unclassified_Metazoa	0.52	unclassified_Metazoa	0.23	unclassified_Metazoa	0.1	unclassified_Metazoa	0.01	unclassified_Metazoa	0.01	unclassified_Metazoa_sp	0.01	0	0	0	0	0	0	0	0	0	0	0	0	0	0	0	0	0	0	0	0	0	0	0	0	0	0	0	0	0	0	0	0	12	0
9e581b56a8ff83fa715a9f60c530d4d23e92aeef	#N/A	Metazoa	0.89	unclassified_Metazoa	0.52	unclassified_Metazoa	0.14	unclassified_Metazoa	0.02	unclassified_Metazoa	0.01	unclassified_Metazoa	0.01	unclassified_Metazoa_sp	0.01	0	0	0	0	0	0	0	0	0	0	0	6	0	0	0	0	0	0	0	0	0	0	0	0	0	0	0	0	0	0	0	0	0	0
9f45b472cb44ef394a8fb2b4b1c8ff6d9c58b200	#N/A	Metazoa	0.9	unclassified_Metazoa	0.69	unclassified_Metazoa	0.12	unclassified_Metazoa	0.03	unclassified_Metazoa	0.01	unclassified_Metazoa	0.01	unclassified_Metazoa_sp	0.01	0	0	0	0	0	0	0	0	0	0	0	0	0	0	0	0	0	0	0	0	0	0	0	0	0	0	0	0	0	0	0	0	0	0
a05a02b9fe86e2053fe24efa55a8db39128fcb07	#N/A	Metazoa	0.84	unclassified_Metazoa	0.17	unclassified_Metazoa	0.16	unclassified_Metazoa	0.15	unclassified_Metazoa	0.01	unclassified_Metazoa	0.01	unclassified_Metazoa_sp	0.01	0	0	0	0	0	0	0	0	0	0	0	0	0	0	0	0	0	0	0	0	0	0	0	0	0	0	0	0	0	0	0	0	2	0
a1a39a1eec501b07c5005fd00e2753a4f5007346	#N/A	Metazoa	0.83	unclassified_Metazoa	0.46	unclassified_Metazoa	0.25	unclassified_Metazoa	0.19	unclassified_Metazoa	0.01	unclassified_Metazoa	0.01	unclassified_Metazoa_sp	0.01	0	0	0	0	0	0	0	0	0	0	0	0	0	0	0	0	0	0	0	0	0	0	0	0	0	0	0	0	0	0	0	0	8	0
a33d90e6a9fc1bb0d427052ff548248da44c3ea1	#N/A	Metazoa	0.83	unclassified_Metazoa	0.19	unclassified_Metazoa	0.15	unclassified_Metazoa	0.02	unclassified_Metazoa	0.01	unclassified_Metazoa	0.01	unclassified_Metazoa_sp	0.01	0	0	0	0	0	0	0	0	0	0	0	0	0	0	0	0	0	0	0	0	0	0	0	0	0	0	0	0	0	0	0	0	0	0
a3d372ae48a090dcd7f2218f0d526d2b4551bd41	#N/A	Metazoa	0.98	unclassified_Metazoa	0.76	unclassified_Metazoa	0.55	unclassified_Metazoa	0.01	unclassified_Metazoa	0.01	unclassified_Metazoa	0.01	unclassified_Metazoa_sp	0.01	0	0	0	0	0	0	0	0	0	0	0	0	0	0	0	0	0	0	0	0	0	0	0	0	0	0	0	0	0	0	0	0	0	0
ae752846ccd5b5c57b5ea63bc962507e5d1b4503	#N/A	Metazoa	0.86	unclassified_Metazoa	0.03	unclassified_Metazoa	0.03	unclassified_Metazoa	0.01	unclassified_Metazoa	0.01	unclassified_Metazoa	0.01	unclassified_Metazoa_sp	0.01	0	0	0	0	0	0	0	0	0	0	0	0	0	0	0	0	0	3	0	0	0	0	0	0	0	0	0	0	0	0	0	2	0	2
b130a3ad19f34373039d09e5e393bacab7734069	#N/A	Metazoa	1	unclassified_Metazoa	0.69	unclassified_Metazoa	0.55	unclassified_Metazoa	0.26	unclassified_Metazoa	0.05	unclassified_Metazoa	0.01	unclassified_Metazoa_sp	0.01	0	0	0	0	0	0	0	0	0	0	0	0	0	0	0	0	0	0	0	0	0	0	0	0	12	0	0	0	0	0	0	0	0	0
b3b1c25a5340dd8e11f3334ec29e2963ed3739cb	#N/A	Metazoa	0.99	unclassified_Metazoa	0.77	unclassified_Metazoa	0.5	unclassified_Metazoa	0.2	unclassified_Metazoa	0.05	unclassified_Metazoa	0.01	unclassified_Metazoa_sp	0.01	0	0	0	0	0	0	0	0	0	0	0	0	0	0	0	0	0	0	0	2	0	0	0	0	0	0	0	0	0	0	0	0	0	0
b53649bba910166a8608631765326ade92497237	#N/A	Metazoa	0.87	unclassified_Metazoa	0.72	unclassified_Metazoa	0.27	unclassified_Metazoa	0.02	unclassified_Metazoa	0.02	unclassified_Metazoa	0.01	unclassified_Metazoa_sp	0.01	0	0	0	0	0	0	0	0	0	0	0	0	0	0	0	0	0	0	0	0	0	0	0	0	0	0	0	0	0	0	0	0	0	0
b69af0c90adff07f5d35a04123adb85345d1ffa6	#N/A	Metazoa	1	unclassified_Metazoa	0.27	unclassified_Metazoa	0.24	unclassified_Metazoa	0.01	unclassified_Metazoa	0.01	unclassified_Metazoa	0.01	unclassified_Metazoa_sp	0.01	0	0	0	0	0	0	0	0	0	0	0	0	0	0	4	0	75	49	0	0	88	0	0	0	0	0	0	0	0	0	0	0	0	6
b9b9e6b1e8e6a55029df47fb8ecd29fc63033a81	#N/A	Metazoa	0.91	unclassified_Metazoa	0.66	unclassified_Metazoa	0.2	unclassified_Metazoa	0.06	unclassified_Metazoa	0.01	unclassified_Metazoa	0.01	unclassified_Metazoa_sp	0.01	0	0	0	0	0	0	0	0	0	0	0	0	0	0	0	0	0	0	0	0	0	0	0	0	0	0	0	0	0	0	2	0	0	0
bc41752e36b8291ec2fdca7b12910a0be4dc0972	#N/A	Metazoa	0.85	unclassified_Metazoa	0.35	unclassified_Metazoa	0.16	unclassified_Metazoa	0.1	unclassified_Metazoa	0.02	unclassified_Metazoa	0.01	unclassified_Metazoa_sp	0.01	0	0	0	0	0	0	0	0	0	0	0	0	0	0	0	0	0	0	0	0	0	0	0	0	0	0	0	0	0	0	0	0	0	0
c03787c18e63006c921c2f9dde6ba6787c19954a	#N/A	Metazoa	0.94	unclassified_Metazoa	0.24	unclassified_Metazoa	0.09	unclassified_Metazoa	0.02	unclassified_Metazoa	0.02	unclassified_Metazoa	0.01	unclassified_Metazoa_sp	0.01	0	0	0	0	0	45	0	0	0	0	0	0	0	0	0	0	0	0	0	0	0	0	0	0	0	0	0	0	0	0	0	0	0	0
c09be041343d056f4c39ec3e009d4a88702b7609	#N/A	Metazoa	0.87	unclassified_Metazoa	0.21	unclassified_Metazoa	0.2	unclassified_Metazoa	0.09	unclassified_Metazoa	0.06	unclassified_Metazoa	0.01	unclassified_Metazoa_sp	0.01	0	0	0	0	0	0	0	0	0	0	0	0	0	0	0	0	0	0	0	0	0	0	0	0	0	0	0	0	0	0	0	2	0	0
c137a7f542712df6f2dc59ee7a4e766d148d1cb2	#N/A	Metazoa	0.82	unclassified_Metazoa	0.43	unclassified_Metazoa	0.26	unclassified_Metazoa	0.06	unclassified_Metazoa	0.06	unclassified_Metazoa	0.01	unclassified_Metazoa_sp	0.01	0	0	0	0	0	0	0	0	0	0	8	0	0	0	0	0	0	0	0	0	0	0	0	0	0	0	0	0	0	0	0	0	0	0
c3459ab1f1606a5185f7d6354f4134af32fb76de	#N/A	Metazoa	0.82	unclassified_Metazoa	0.65	unclassified_Metazoa	0.42	unclassified_Metazoa	0.2	unclassified_Metazoa	0.08	unclassified_Metazoa	0.01	unclassified_Metazoa_sp	0.01	0	0	0	0	0	0	0	0	0	0	0	0	0	0	0	0	0	0	0	0	0	0	0	0	0	0	0	0	0	0	0	0	2	0
c43fed5161c6be3f110ea68809bbcba67e276770	#N/A	Metazoa	0.8	unclassified_Metazoa	0.04	unclassified_Metazoa	0.04	unclassified_Metazoa	0.04	unclassified_Metazoa	0.01	unclassified_Metazoa	0.01	unclassified_Metazoa_sp	0.01	0	0	0	0	0	0	0	0	0	0	0	0	0	0	0	0	0	0	0	0	0	0	0	0	0	0	0	0	0	0	0	0	0	0
c5d23caababb53eb8414b6e3f6b685b46729bd70	#N/A	Metazoa	0.82	unclassified_Metazoa	0.59	unclassified_Metazoa	0.21	unclassified_Metazoa	0.03	unclassified_Metazoa	0.01	unclassified_Metazoa	0.01	unclassified_Metazoa_sp	0.01	0	0	0	0	0	0	0	0	0	0	0	0	0	0	0	0	2	0	0	0	0	0	0	0	0	0	0	0	0	0	0	0	0	0
d1a97a92f249eb8d1e538b1f23da7552c3297e77	#N/A	Metazoa	0.88	unclassified_Metazoa	0.37	unclassified_Metazoa	0.21	unclassified_Metazoa	0.05	unclassified_Metazoa	0.01	unclassified_Metazoa	0.01	unclassified_Metazoa_sp	0.01	0	0	0	0	0	0	0	0	5	0	0	0	0	0	0	0	0	0	0	0	0	0	0	0	0	0	0	0	0	0	0	0	0	0
d46e742f915a92d1f490656935dc9ff19a25f69b	#N/A	Metazoa	0.82	unclassified_Metazoa	0.35	unclassified_Metazoa	0.12	unclassified_Metazoa	0.03	unclassified_Metazoa	0.01	unclassified_Metazoa	0.01	unclassified_Metazoa_sp	0.01	0	0	0	0	0	0	0	0	0	0	0	0	0	0	0	0	0	0	0	0	0	0	0	0	3	0	0	0	0	0	0	0	0	0
dd0511630fc8239071f6649c28336ae2f4260635	#N/A	Metazoa	0.99	unclassified_Metazoa	0.68	unclassified_Metazoa	0.08	unclassified_Metazoa	0.01	unclassified_Metazoa	0.01	unclassified_Metazoa	0.01	unclassified_Metazoa_sp	0.01	0	0	0	0	0	2	0	0	0	0	0	0	0	0	0	0	0	0	31	0	3	0	0	0	0	0	0	0	0	0	0	0	3	2
debf992253836f5482e4d288a4bff5d0d0236e2d	#N/A	Metazoa	0.82	unclassified_Metazoa	0.63	unclassified_Metazoa	0.05	unclassified_Metazoa	0.03	unclassified_Metazoa	0.01	unclassified_Metazoa	0.01	unclassified_Metazoa_sp	0.01	0	0	0	0	0	0	0	0	0	0	0	0	0	0	0	0	0	0	0	0	0	0	0	0	0	0	0	0	0	0	0	3	0	0
e6747664ec97038dbec6944d3f4c14c9d078302f	#N/A	Metazoa	0.87	unclassified_Metazoa	0.43	unclassified_Metazoa	0.13	unclassified_Metazoa	0.09	unclassified_Metazoa	0.01	unclassified_Metazoa	0.01	unclassified_Metazoa_sp	0.01	0	0	0	15	0	18	0	0	0	0	10	0	0	0	0	0	0	0	0	0	0	0	0	0	0	0	0	0	0	0	0	3	8	0
e9618b48404067e35cff4c296fb1152844979813	#N/A	Metazoa	0.82	unclassified_Metazoa	0.74	unclassified_Metazoa	0.59	unclassified_Metazoa	0.16	unclassified_Metazoa	0.02	unclassified_Metazoa	0.01	unclassified_Metazoa_sp	0.01	0	0	0	0	0	0	0	0	0	0	0	0	0	0	0	0	0	0	0	0	0	0	0	0	0	0	0	0	0	0	0	0	0	0
e97eeed0cfe0c0b8329c6e24ee20fd5783500587	#N/A	Metazoa	0.95	unclassified_Metazoa	0.78	unclassified_Metazoa	0.11	unclassified_Metazoa	0.03	unclassified_Metazoa	0.01	unclassified_Metazoa	0.01	unclassified_Metazoa_sp	0.01	0	0	0	0	0	0	0	0	0	0	0	0	0	0	0	0	0	2	0	0	0	0	0	0	0	0	0	0	0	0	0	0	0	0
ebbbb6c3075e321285b743e6291ce24885ecf465	#N/A	Metazoa	0.89	unclassified_Metazoa	0.69	unclassified_Metazoa	0.56	unclassified_Metazoa	0.05	unclassified_Metazoa	0.01	unclassified_Metazoa	0.01	unclassified_Metazoa_sp	0.01	0	0	0	0	0	0	0	0	0	0	0	0	0	0	0	0	0	0	0	0	0	0	0	0	0	0	0	0	0	0	0	0	0	0
ee3b0315c5b2a6d51ad5eb1e7a77b0da8e22d0d0	#N/A	Metazoa	0.89	unclassified_Metazoa	0.11	unclassified_Metazoa	0.1	unclassified_Metazoa	0.04	unclassified_Metazoa	0.02	unclassified_Metazoa	0.01	unclassified_Metazoa_sp	0.01	0	0	0	0	0	0	3	0	0	0	0	0	0	0	0	0	0	0	0	0	0	0	0	0	0	0	0	0	0	2	0	0	0	0
f26809b2ac3d9ffb3acc8cd58663c1a33d9018f7	#N/A	Metazoa	0.82	unclassified_Metazoa	0.04	unclassified_Metazoa	0.04	unclassified_Metazoa	0.03	unclassified_Metazoa	0.03	unclassified_Metazoa	0.01	unclassified_Metazoa_sp	0.01	0	0	0	0	0	0	0	0	0	0	4	0	0	0	0	0	0	0	0	0	0	0	0	0	0	0	0	0	0	0	0	0	0	0
f2c0d37eebba7f268aac00c9747fe9e3b18492b4	#N/A	Metazoa	0.85	unclassified_Metazoa	0.71	unclassified_Metazoa	0.56	unclassified_Metazoa	0.1	unclassified_Metazoa	0.02	unclassified_Metazoa	0.01	unclassified_Metazoa_sp	0.01	0	0	0	0	0	0	0	0	0	0	0	0	0	0	0	0	0	0	0	0	0	0	0	0	0	0	0	0	0	3	0	0	0	0
f5d2d376ac98c4d129025893c8d32457a8e37a01	#N/A	Metazoa	0.97	unclassified_Metazoa	0.72	unclassified_Metazoa	0.05	unclassified_Metazoa	0.04	unclassified_Metazoa	0.02	unclassified_Metazoa	0.01	unclassified_Metazoa_sp	0.01	0	0	0	0	0	0	0	0	0	0	0	0	0	0	0	0	0	0	0	0	0	2	0	0	0	0	0	0	0	0	0	0	0	0
fb39e0310ba332bfe4e19c0e63c1cbf86a9481dc	#N/A	Metazoa	0.86	unclassified_Metazoa	0.39	unclassified_Metazoa	0.14	unclassified_Metazoa	0.03	unclassified_Metazoa	0.01	unclassified_Metazoa	0.01	unclassified_Metazoa_sp	0.01	0	0	0	0	0	0	0	0	0	0	0	0	0	0	0	0	0	0	30	0	2	0	0	0	0	0	0	0	0	0	0	0	0	0
fed7e62f72505a1c7a19d3dba76d98cc862b7d57	#N/A	Metazoa	0.81	unclassified_Metazoa	0.44	unclassified_Metazoa	0.13	unclassified_Metazoa	0.1	unclassified_Metazoa	0.01	unclassified_Metazoa	0.01	unclassified_Metazoa_sp	0.01	0	0	0	0	0	0	0	0	0	0	0	0	0	0	0	0	0	0	0	0	0	0	0	0	0	0	0	0	0	0	0	0	0	0
1cf05d3111d05efc4bb3a3e86894e8b0a94d1cbc	#N/A	Metazoa	0.88	unclassified_Metazoa	0.56	unclassified_Metazoa	0.42	unclassified_Metazoa	0.11	unclassified_Metazoa	0.04	unclassified_Metazoa	0.01	unclassified_Metazoa_sp	0	0	0	0	0	0	0	0	0	0	0	0	0	0	0	0	0	0	0	0	0	0	0	0	0	0	0	0	0	0	2	0	6	0	0
22ebbb79b1569647ae0c1cc2ed7dd77fca5d8bab	#N/A	Metazoa	0.83	unclassified_Metazoa	0.45	unclassified_Metazoa	0.28	unclassified_Metazoa	0.1	unclassified_Metazoa	0.01	unclassified_Metazoa	0.01	unclassified_Metazoa_sp	0	0	0	0	0	0	0	0	0	0	0	0	0	0	0	0	0	0	0	0	0	0	0	0	0	0	0	0	0	0	0	0	0	0	0
aaeff63f09523be49c8c9a61c80d586fa5513c0e	#N/A	Metazoa	0.83	unclassified_Metazoa	0.01	unclassified_Metazoa	0.01	unclassified_Metazoa	0.01	unclassified_Metazoa	0.01	unclassified_Metazoa	0.01	unclassified_Metazoa_sp	0	0	0	0	0	0	0	0	0	0	0	0	0	0	0	0	0	0	0	0	0	0	0	0	0	0	0	0	12	0	0	0	0	0	0
c725f952a9ee1475e551453bc2e1f086611d266a	#N/A	Metazoa	0.84	unclassified_Metazoa	0.39	unclassified_Metazoa	0.28	unclassified_Metazoa	0.19	unclassified_Metazoa	0.04	unclassified_Metazoa	0.01	unclassified_Metazoa_sp	0	0	0	35	0	0	0	0	0	0	0	0	0	0	0	0	0	0	0	0	0	0	0	0	0	0	0	0	0	0	0	0	17	0	0
d464c4ac985ecc4a2719e4274c4b687b156f1a42	#N/A	Metazoa	0.83	unclassified_Metazoa	0.62	unclassified_Metazoa	0.52	unclassified_Metazoa	0.16	unclassified_Metazoa	0.02	unclassified_Metazoa	0.01	unclassified_Metazoa_sp	0	0	0	0	0	0	0	0	0	0	0	0	0	0	0	0	0	0	0	0	0	0	0	0	0	0	0	8	0	0	0	0	0	0	0
fcccc7d2c5ea96b11986dcad13e41fe89ecf3ec0	#N/A	Metazoa	0.82	unclassified_Metazoa	0.47	unclassified_Metazoa	0.34	unclassified_Metazoa	0.18	unclassified_Metazoa	0.01	unclassified_Metazoa	0.01	unclassified_Metazoa_sp	0	0	0	0	0	0	0	0	0	0	0	0	0	0	0	0	0	0	0	0	0	0	0	0	0	0	0	0	0	0	0	7	0	0	0
[truncated: 54 more rows]
[truncated: 24 more columns]

## Sheet: legend
Table S1. Illumina dataset of Metazoan OTUs, including mite OTUs. The prefix “b” in the sample header indicates samples subjected to the 2 g DNA extraction treatment, while “s” denotes the 0.2 g DNA extraction treatment. The numbers following the prefix represent the site number (first digit) and the replicate number in that site along the transect (second digit). Column "*_BootS" denotes the RDP…
