# Supplementary material for: DNA metabarcoding of mites from small soil samples: limited agreement with morphological identifications but improved results from long-read sequencing
Source: PeerJ. 2025 Oct 20;13:e20205. doi: 10.7717/peerj.20205 (PMC12548636; doi:10.7717/peerj.20205)
Supplement: Supplemental Information 2 — The prefix “b” in the sample header indicates samples subjected to the 2 g DNA extraction treatment, while “s” denotes the 0.2 g DNA extraction treatment. The numbers following the prefix represent the site number (first digit) and the replicate number in that site along the transect (second digit). Column ”*_BootS” denotes the RDP bootstrap value for the corresponding taxonomic level. [file peerj-13-20205-s002.xlsx]

## Sheet: Table S2
Metazoan_OTU	Mite_OTU	kingdom	kingdom_BootS	phylum	phylum_BootS	class	class_BootS	order	order_BootS	family	family_BootS	genus	genus_BootS	species	species_BootS	b1.1	b1.2	b1.3	b1.4	b1.5	b1.6	b2.1	b2.2	b2.3	b2.4	b2.5	b3.1	b3.2	b3.3	b3.4	b3.5	b3.6	b4.1	b4.2	b4.3	b4.4	b4.5	b4.6	b5.1	b5.2	b5.3	b5.4	b5.5	b5.6	s1.1	s1.2	s1.3	s1.4	s1.5
010bbb8ba85bb4d5734f0b2b4edfee91a9670c9a	010bbb8ba85bb4d5734f0b2b4edfee91a9670c9a	Metazoa	0.99	Arthropoda	0.97	Arachnida	0.88	Sarcoptiformes	0.84	unclassified_Sarcoptiformes	0.08	unclassified_Sarcoptiformes	0.08	unclassified_Sarcoptiformes_sp	0.05	0	0	0	0	0	0	0	0	0	0	0	45	0	0	0	0	0	0	0	0	0	0	0	0	0	0	0	0	0	0	0	0	0	0
026d246b4a66cdb07693c5fba057a082bd12dd56	026d246b4a66cdb07693c5fba057a082bd12dd56	Metazoa	0.82	Arthropoda	0.81	Arachnida	0.81	unclassified_Arachnida	0.79	unclassified_Arachnida	0.79	unclassified_Arachnida	0.79	unclassified_Arachnida_sp	0.79	0	0	0	0	0	0	0	0	0	0	0	0	0	0	0	0	0	0	0	0	0	0	0	0	0	0	0	0	0	0	0	0	0	0
07ac131b5b98c96ad7869d08deb23604564cc209	07ac131b5b98c96ad7869d08deb23604564cc209	Metazoa	1	Arthropoda	0.98	Arachnida	0.95	Sarcoptiformes	0.94	unclassified_Sarcoptiformes	0.76	unclassified_Sarcoptiformes	0.76	unclassified_Sarcoptiformes_sp	0.38	0	0	0	0	0	0	0	0	0	0	0	0	0	0	0	0	0	0	0	0	0	0	0	0	0	0	0	0	0	0	0	0	0	0
0fd87b27a605091479df3e4bc88107e4c977c1a4	0fd87b27a605091479df3e4bc88107e4c977c1a4	Metazoa	1	Arthropoda	0.99	Arachnida	0.86	Sarcoptiformes	0.85	Oribotritiidae	0.84	Mesotritia	0.84	Mesotritia_sp	0.84	1	0	0	0	0	0	0	0	0	0	0	0	0	0	0	0	0	0	0	0	0	0	0	0	0	0	0	0	0	0	0	0	0	0
113634a3d7008d25fc4b60daa81265ff4d24c275	113634a3d7008d25fc4b60daa81265ff4d24c275	Metazoa	1	Arthropoda	1	Arachnida	1	Sarcoptiformes	1	Oppiidae	1	Oppiella	1	Oppiella_nova	1	0	24	0	0	0	0	0	0	0	0	0	0	0	0	0	0	0	0	0	0	0	0	0	0	0	0	0	0	0	0	0	0	0	0
146da41f8d0c67767de8b4edd08af4f06331866a	146da41f8d0c67767de8b4edd08af4f06331866a	Metazoa	1	Arthropoda	1	Arachnida	1	Sarcoptiformes	1	Hemileiidae	0.99	Hemileius	0.99	Hemileius_initialis	0.99	0	0	0	0	0	0	0	0	0	0	0	0	0	0	0	0	0	0	0	0	0	0	0	0	0	0	0	0	0	0	0	0	0	0
14a8270cee5791743937262e1473d4038be619b3	14a8270cee5791743937262e1473d4038be619b3	Metazoa	1	Arthropoda	1	Arachnida	1	Sarcoptiformes	1	Suctobelbidae	1	Suctobelbella	1	Suctobelbella_subcornigera	1	0	0	1	0	1	14	0	0	0	0	0	0	0	0	2	0	0	0	0	1	0	0	0	0	0	0	0	0	0	0	0	18	0	0
1852af492579703e19ec85dc8591360acf069f31	1852af492579703e19ec85dc8591360acf069f31	Metazoa	1	Arthropoda	1	Arachnida	1	Sarcoptiformes	1	unclassified_Sarcoptiformes	0.73	unclassified_Sarcoptiformes	0.73	unclassified_Sarcoptiformes_sp	0.73	0	0	0	0	0	0	0	0	0	0	0	0	0	0	0	0	0	0	0	0	0	0	0	0	0	0	0	0	0	0	0	1	0	0
24aa111ba9d69fa948993471786b6a4ebd814e15	24aa111ba9d69fa948993471786b6a4ebd814e15	Metazoa	1	Arthropoda	1	Arachnida	1	Sarcoptiformes	1	Oppiidae	1	Oppiella	1	Oppiella_nova	1	132	42	0	0	0	2	0	1	1	0	0	0	0	11	0	0	0	0	0	0	1	0	0	0	0	0	0	0	0	0	0	0	0	0
2b1382653d53a91fa6c9e21855bcc710419ab204	2b1382653d53a91fa6c9e21855bcc710419ab204	Metazoa	1	Arthropoda	1	Arachnida	0.97	Sarcoptiformes	0.97	Suctobelbidae	0.95	Suctobelbella	0.95	Suctobelbella_sp	0.71	0	0	0	0	0	0	0	0	0	0	0	0	0	0	0	0	0	0	0	0	0	0	0	0	0	0	0	0	0	0	0	0	0	0
2e20c420be0c7ce8a27cf08fd481406d5550fcac	2e20c420be0c7ce8a27cf08fd481406d5550fcac	Metazoa	1	Arthropoda	1	Arachnida	1	Sarcoptiformes	1	Suctobelbidae	1	Suctobelbella	1	Suctobelbella_subcornigera	1	0	0	0	1	0	0	0	0	0	0	0	0	0	0	0	0	0	0	0	1	0	0	0	0	0	0	0	0	0	0	0	1	0	0
2f223d1cdaecc0315d96b47e6ea2c1148c580969	2f223d1cdaecc0315d96b47e6ea2c1148c580969	Metazoa	0.99	Arthropoda	0.99	Arachnida	0.99	Sarcoptiformes	0.99	Steganacaridae	0.99	Atropacarus	0.99	Atropacarus_sp._BOLD:ACF0837	0.98	0	0	0	1	0	0	0	0	0	0	0	0	0	0	0	0	0	0	0	0	0	0	0	0	0	0	0	0	0	0	0	0	0	0
32d46cf081efc371640f681377e2e03640be05db	32d46cf081efc371640f681377e2e03640be05db	Metazoa	1	Arthropoda	0.99	Arachnida	0.98	Sarcoptiformes	0.97	Nanorchestidae	0.97	Speleorchestes	0.97	Speleorchestes_sp	0.64	0	0	0	0	0	0	0	0	0	0	0	0	0	0	0	0	0	0	0	0	0	0	0	0	0	0	0	0	0	0	0	0	0	0
4299aa578c5850f0d04cb32ab0ecbf48a059d314	4299aa578c5850f0d04cb32ab0ecbf48a059d314	Metazoa	1	Arthropoda	1	Arachnida	0.82	Trombidiformes	0.8	unclassified_Trombidiformes	0.75	unclassified_Trombidiformes	0.72	unclassified_Trombidiformes_sp	0.52	0	0	0	0	0	0	0	0	0	0	0	0	0	0	0	0	0	0	0	0	0	0	0	0	0	0	0	0	0	0	1	0	0	0
4740a29894ae898580264e2c6518cefd1904eb95	4740a29894ae898580264e2c6518cefd1904eb95	Metazoa	0.98	Arthropoda	0.98	Arachnida	0.98	Trombidiformes	0.98	Eriophyidae	0.98	Abacarus	0.9	Abacarus_sp	0.86	0	0	0	0	1	0	0	0	0	0	0	0	0	0	0	0	0	0	0	0	0	0	0	0	0	0	0	0	0	0	0	0	0	0
476a35e91920deae06c6f7d72dee876860acd3c7	476a35e91920deae06c6f7d72dee876860acd3c7	Metazoa	1	Arthropoda	1	Arachnida	1	Trombidiformes	1	Phytoptidae	1	Sierraphytoptus	1	Sierraphytoptus_ambulans	1	0	0	0	0	0	0	0	0	0	0	0	0	0	0	0	0	0	0	0	0	0	0	0	0	0	0	0	0	0	0	0	0	0	0
4c604e478102b5cdfee578a05394446881b04f1d	4c604e478102b5cdfee578a05394446881b04f1d	Metazoa	1	Arthropoda	1	Arachnida	1	Sarcoptiformes	1	Oppiidae	1	Multioppia	1	Multioppia_glabra	1	0	0	0	0	0	0	0	0	0	0	0	0	0	0	0	0	0	0	19	0	0	0	0	0	0	0	0	0	0	0	0	0	0	0
4fc63c3904bf42f75cf6dd8d03b332731591371c	4fc63c3904bf42f75cf6dd8d03b332731591371c	Metazoa	1	Arthropoda	1	Arachnida	1	Sarcoptiformes	1	Eniochthoniidae	1	Eniochthonius	1	Eniochthonius_minutissimus	1	0	0	0	0	0	0	0	0	0	0	0	1	0	0	0	0	0	0	0	0	0	0	0	0	0	0	0	0	0	0	0	0	0	0
5d79205e37e73ccb2ef92475df5102919481dbe7	5d79205e37e73ccb2ef92475df5102919481dbe7	Metazoa	1	Arthropoda	1	Arachnida	1	Sarcoptiformes	1	Quadroppiidae	1	Quadroppia	1	Quadroppia_quadricarinata	1	0	0	0	0	0	0	0	0	0	0	0	0	2	0	0	0	0	0	0	0	0	0	0	0	0	0	0	0	0	0	0	0	0	0
5debe676299a492c99cf7ef043941f321a927a72	5debe676299a492c99cf7ef043941f321a927a72	Metazoa	0.86	Arthropoda	0.86	Arachnida	0.85	Trombidiformes	0.84	Eriophyidae	0.84	Acalitus	0.84	Acalitus_sp	0.84	10	10	2	1	0	1	0	0	0	0	0	0	2	1	0	1	1	0	0	0	0	0	0	0	0	0	0	0	0	2	0	0	0	0
620e256af74fc24cad0e99718454dfa008398bac	620e256af74fc24cad0e99718454dfa008398bac	Metazoa	0.98	Arthropoda	0.95	Arachnida	0.93	Sarcoptiformes	0.91	Brachychthoniidae	0.88	Liochthonius	0.88	Liochthonius_sp	0.88	0	0	0	0	0	0	0	0	0	0	0	0	0	0	0	0	0	0	0	0	0	0	0	0	0	0	0	0	0	0	0	0	0	0
6665484b22956e2c2b56d313cbbfefe3b0057641	6665484b22956e2c2b56d313cbbfefe3b0057641	Metazoa	0.99	Arthropoda	0.99	Arachnida	0.97	Sarcoptiformes	0.97	unclassified_Sarcoptiformes	0.7	unclassified_Sarcoptiformes	0.69	unclassified_Sarcoptiformes_sp	0.34	0	0	0	0	0	0	0	0	0	0	0	0	0	0	0	0	0	0	0	0	0	0	0	0	0	0	0	0	0	0	0	0	0	0
6697bc0f1281ddac9692fc57f2808437c6641f51	6697bc0f1281ddac9692fc57f2808437c6641f51	Metazoa	1	Arthropoda	1	Arachnida	1	Sarcoptiformes	1	Suctobelbidae	1	Suctobelbella	1	Suctobelbella_sp	0.56	0	0	0	0	0	1	0	0	0	0	0	0	0	0	0	0	0	0	3	0	0	0	0	0	0	0	0	0	0	0	0	0	0	0
66b7b47b4c923aa4c58d5efe65234e83fe3ea593	66b7b47b4c923aa4c58d5efe65234e83fe3ea593	Metazoa	1	Arthropoda	1	Arachnida	0.88	Trombidiformes	0.87	Cocceupodidae	0.8	Linopodes	0.8	Linopodes_sp	0.4	0	0	0	0	0	0	0	0	0	0	0	0	0	0	0	0	0	0	0	0	0	0	1	0	0	0	0	0	0	0	0	0	0	0
6897c217d0b76ddad638f0d81c4b0f2409efe650	6897c217d0b76ddad638f0d81c4b0f2409efe650	Metazoa	1	Arthropoda	0.98	Arachnida	0.98	Sarcoptiformes	0.98	Suctobelbidae	0.84	Suctobelbella	0.83	Suctobelbella_sp	0.68	0	0	0	0	0	0	0	0	0	0	0	40	0	0	0	0	0	0	0	0	0	0	0	0	0	0	0	0	0	0	0	0	0	0
6ae1dd7a6804be47bfa8e0819fc44f01ecdf278c	6ae1dd7a6804be47bfa8e0819fc44f01ecdf278c	Metazoa	1	Arthropoda	1	Arachnida	1	Trombidiformes	1	Tarsonemidae	1	Steneotarsonemus	1	Steneotarsonemus_laticeps	1	0	0	0	0	0	0	0	0	0	0	0	0	0	0	0	0	0	0	0	0	0	0	0	0	0	0	0	0	0	0	0	0	1	0
6b5676a7aa81d90814d7d66be8fede2d81c59b8f	6b5676a7aa81d90814d7d66be8fede2d81c59b8f	Metazoa	1	Arthropoda	0.98	Arachnida	0.86	Sarcoptiformes	0.86	unclassified_Sarcoptiformes	0.27	unclassified_Sarcoptiformes	0.2	unclassified_Sarcoptiformes_sp	0.11	0	1	0	0	0	0	0	0	0	0	0	0	0	0	0	0	0	0	0	0	0	0	0	0	0	0	0	0	0	0	0	0	0	0
6d5af0daa504f295db987db7faa1228b0366c539	6d5af0daa504f295db987db7faa1228b0366c539	Metazoa	1	Arthropoda	1	Arachnida	1	Sarcoptiformes	1	Nothridae	1	Nothrus	1	Nothrus_silvestris	1	0	0	0	0	0	0	0	0	0	0	0	0	0	0	0	0	0	0	0	0	0	0	0	0	0	0	0	0	0	0	0	0	0	0
6e6b37aa0d68d58737ea986ae32c50e167e3350c	6e6b37aa0d68d58737ea986ae32c50e167e3350c	Metazoa	1	Arthropoda	1	Arachnida	1	Sarcoptiformes	1	Steganacaridae	1	Steganacarus	1	Steganacarus_carinatus	1	0	0	0	0	0	0	0	0	0	0	0	0	40	0	0	0	0	0	0	0	0	0	0	0	0	0	0	0	0	0	0	0	0	0
71187abbe60d01586941608204d827723f05a24e	71187abbe60d01586941608204d827723f05a24e	Metazoa	0.99	Arthropoda	0.94	Arachnida	0.93	unclassified_Arachnida	0.75	unclassified_Arachnida	0.22	unclassified_Arachnida	0.22	unclassified_Arachnida_sp	0.1	0	0	0	0	0	0	0	0	0	0	0	0	0	0	0	0	0	0	0	0	0	0	0	0	0	0	0	0	0	0	0	0	0	0
73cf330efdc4844bef5336024f6d6d51aa9c186c	73cf330efdc4844bef5336024f6d6d51aa9c186c	Metazoa	1	Arthropoda	1	Arachnida	1	Sarcoptiformes	1	Nanorchestidae	1	Nanorchestes	1	Nanorchestes_sp._BOLD:AAW0387	1	0	0	0	0	0	0	0	0	0	0	0	0	0	0	0	0	0	0	0	0	0	0	0	0	0	0	0	0	0	0	0	0	0	0
73df8102735668ce9d20d5b6c930bb4b90a837f1	73df8102735668ce9d20d5b6c930bb4b90a837f1	Metazoa	1	Arthropoda	1	Arachnida	0.99	Sarcoptiformes	0.97	unclassified_Sarcoptiformes	0.74	unclassified_Sarcoptiformes	0.74	unclassified_Sarcoptiformes_sp	0.53	0	0	0	0	0	0	0	0	0	0	0	0	0	1	0	0	0	0	0	0	0	0	0	0	0	0	0	0	0	0	0	0	0	0
756bbfd23d5a4fc368d95a4e30c67f3a50516eef	756bbfd23d5a4fc368d95a4e30c67f3a50516eef	Metazoa	1	Arthropoda	1	Arachnida	0.97	Sarcoptiformes	0.97	Suctobelbidae	0.96	Suctobelbella	0.96	Suctobelbella_subcornigera	0.96	0	0	0	0	0	0	0	0	0	0	0	0	0	0	0	0	0	0	0	0	0	0	0	0	0	0	0	0	0	0	0	0	0	0
7e863c5751e0fe3ce63f2d654abc94d80c75b834	7e863c5751e0fe3ce63f2d654abc94d80c75b834	Metazoa	1	Arthropoda	1	Arachnida	1	Trombidiformes	1	Eriophyidae	1	Acalitus	1	Acalitus_vaccinii	1	1	0	1	0	0	0	0	0	0	0	0	0	0	0	0	0	0	0	0	0	0	0	0	0	0	0	0	0	0	0	0	0	0	0
7fce16b8630068bf787bb8704c52cacd61135ff8	7fce16b8630068bf787bb8704c52cacd61135ff8	Metazoa	1	Arthropoda	1	Arachnida	1	Sarcoptiformes	1	Camisiidae	1	Heminothrus	1	Heminothrus_targionii	1	0	0	0	0	0	0	0	0	1	0	0	0	3	0	0	0	0	0	0	0	0	0	0	0	0	0	0	0	0	0	0	0	0	0
841c6c4df83f778fb3728220cb9108220b4bf7f2	841c6c4df83f778fb3728220cb9108220b4bf7f2	Metazoa	0.94	Arthropoda	0.91	Arachnida	0.84	Trombidiformes	0.81	Eriophyidae	0.81	Acalitus	0.81	Acalitus_sp	0.81	0	0	1	0	0	0	0	0	0	0	0	0	0	0	0	0	0	0	0	0	0	0	0	0	0	0	0	0	0	0	0	0	0	0
88e84c512535af658e4e656e34bbec618f59722f	88e84c512535af658e4e656e34bbec618f59722f	Metazoa	1	Arthropoda	1	Arachnida	1	Sarcoptiformes	1	Nanorchestidae	1	Speleorchestes	1	Speleorchestes_sp._BOLD:ADD1743	0.96	0	0	0	0	0	0	0	0	0	0	0	0	0	2	4	0	0	0	0	0	0	0	0	0	0	0	0	0	0	0	0	0	0	0
8c246a34c9774f9a6c626ebf6ce6a83017ce2f7f	8c246a34c9774f9a6c626ebf6ce6a83017ce2f7f	Metazoa	1	Arthropoda	1	Arachnida	1	Sarcoptiformes	1	Suctobelbidae	1	Suctobelbella	1	Suctobelbella_subcornigera	1	0	0	0	0	0	0	0	0	0	0	0	0	0	0	0	0	0	0	0	1	0	0	0	0	0	0	0	0	0	0	0	0	0	0
8c6f4a2675df124e84c296f7415b350dc9438055	8c6f4a2675df124e84c296f7415b350dc9438055	Metazoa	1	Arthropoda	1	Arachnida	1	Trombidiformes	1	Eriophyidae	1	Eriophyes	1	Eriophyes_padi	1	0	0	0	0	0	1	0	0	0	0	0	0	0	0	0	0	0	0	0	0	0	0	0	0	0	0	0	0	0	0	0	0	0	0
8d54c47a1307e6d697851ba0bb0658a21cf7120c	8d54c47a1307e6d697851ba0bb0658a21cf7120c	Metazoa	1	Arthropoda	1	Arachnida	0.96	Sarcoptiformes	0.92	unclassified_Sarcoptiformes	0.38	unclassified_Sarcoptiformes	0.15	unclassified_Sarcoptiformes_sp	0.15	0	0	0	0	0	0	0	0	0	0	0	0	0	0	0	0	0	0	0	0	0	0	0	0	0	0	0	0	0	0	0	0	0	0
95d79adf0748a8929f021244b5a30f6be18be67c	95d79adf0748a8929f021244b5a30f6be18be67c	Metazoa	1	Arthropoda	1	Arachnida	1	Sarcoptiformes	1	Suctobelbidae	1	Suctobelbella	1	Suctobelbella_subcornigera	1	0	0	0	0	0	0	1	0	0	0	0	0	0	0	0	0	0	0	0	0	0	0	0	0	0	0	0	0	0	0	0	0	0	0
973d4cad1522c0089e4776d87aa6c9648cee4b65	973d4cad1522c0089e4776d87aa6c9648cee4b65	Metazoa	0.99	Arthropoda	0.96	Arachnida	0.82	unclassified_Arachnida	0.69	unclassified_Arachnida	0.64	unclassified_Arachnida	0.63	unclassified_Arachnida_sp	0.49	0	0	0	0	0	0	0	0	0	0	0	0	0	0	0	0	0	0	0	0	0	0	0	0	0	0	0	0	0	0	0	0	0	0
983cdb815064bb2b8665d5a77b8139fd824840c1	983cdb815064bb2b8665d5a77b8139fd824840c1	Metazoa	1	Arthropoda	1	Arachnida	1	Sarcoptiformes	1	Eniochthoniidae	1	Eniochthonius	1	Eniochthonius_minutissimus	1	0	0	0	0	0	0	0	0	0	0	0	22	0	0	0	2	0	0	0	1	0	0	0	0	0	0	0	0	0	0	0	0	0	0
99d141ae879aafaf1c56fd62ab75aa2061b6c2ab	99d141ae879aafaf1c56fd62ab75aa2061b6c2ab	Metazoa	1	Arthropoda	1	Arachnida	1	Mesostigmata	1	Parasitidae	1	Pergamasus	1	Pergamasus_misellus	1	0	0	0	0	0	0	0	0	0	0	0	0	0	0	0	0	0	0	0	0	0	0	0	0	0	0	0	0	0	0	0	0	0	0
9a427b0b5da782ecf4f6c18584af16dd8247723a	9a427b0b5da782ecf4f6c18584af16dd8247723a	Metazoa	1	Arthropoda	0.99	Arachnida	0.96	Sarcoptiformes	0.96	Suctobelbidae	0.87	Suctobelbella	0.84	Suctobelbella_sp	0.36	0	0	1	0	0	0	0	0	0	0	0	0	0	0	0	0	0	0	0	0	0	0	0	0	0	0	0	0	0	0	0	0	0	0
a24adeb71bc12f62df09fb314d16ffbee3356280	a24adeb71bc12f62df09fb314d16ffbee3356280	Metazoa	1	Arthropoda	1	Arachnida	1	Sarcoptiformes	1	Oppiidae	1	Oppiella	1	Oppiella_nova	1	0	0	0	0	0	0	0	0	0	0	0	0	0	0	0	0	0	0	0	0	0	0	0	1	0	0	0	0	0	0	4	0	0	0
a4f0dede02ebd7b6d70b52788a41f880b2df64b4	a4f0dede02ebd7b6d70b52788a41f880b2df64b4	Metazoa	1	Arthropoda	1	Arachnida	1	Sarcoptiformes	1	Suctobelbidae	1	Suctobelbella	1	Suctobelbella_subcornigera	1	0	0	0	0	0	0	0	0	0	0	0	5	0	0	0	0	0	0	0	0	0	0	1	0	0	0	0	0	0	0	0	0	0	0
b5e72f22bf5b28bd9820b5aea086e18bcda5a598	b5e72f22bf5b28bd9820b5aea086e18bcda5a598	Metazoa	1	Arthropoda	1	Arachnida	1	Sarcoptiformes	1	Damaeidae	1	Damaeus	1	Damaeus_riparius	1	0	0	0	0	0	0	0	0	0	0	0	0	0	0	0	0	0	0	0	0	0	0	0	0	0	0	0	0	0	0	0	0	0	0
bc7acf8f0505268e4bf1a493e55aefb7e7775edd	bc7acf8f0505268e4bf1a493e55aefb7e7775edd	Metazoa	1	Arthropoda	1	Arachnida	0.99	Sarcoptiformes	0.99	Damaeolidae	0.99	Fosseremus	0.99	Fosseremus_laciniatus	0.99	0	0	0	0	0	0	0	0	0	0	0	0	0	0	0	0	1	0	0	0	0	0	0	0	0	0	0	0	0	0	0	0	0	0
bede311eb3978b0551687e9f10e73918f21806ed	bede311eb3978b0551687e9f10e73918f21806ed	Metazoa	1	Arthropoda	0.99	Arachnida	0.87	Sarcoptiformes	0.85	unclassified_Sarcoptiformes	0.24	unclassified_Sarcoptiformes	0.24	unclassified_Sarcoptiformes_sp	0.23	2	4	0	0	5	0	0	0	0	0	0	0	0	0	0	0	0	0	0	0	0	0	0	0	0	0	0	0	0	0	0	0	0	0
c14905387200524191b0217d7f1b3ceeb82a1a7a	c14905387200524191b0217d7f1b3ceeb82a1a7a	Metazoa	1	Arthropoda	1	Arachnida	0.97	Sarcoptiformes	0.97	unclassified_Sarcoptiformes	0.33	unclassified_Sarcoptiformes	0.33	unclassified_Sarcoptiformes_sp	0.09	0	0	0	0	0	0	0	1	0	0	0	0	0	0	0	0	0	0	0	0	0	0	0	0	0	0	0	0	0	0	0	0	0	0
c16e0ac1f169a6a6923d6b061351a96699fc7dfa	c16e0ac1f169a6a6923d6b061351a96699fc7dfa	Metazoa	1	Arthropoda	0.98	Arachnida	0.8	unclassified_Arachnida	0.67	unclassified_Arachnida	0.42	unclassified_Arachnida	0.42	unclassified_Arachnida_sp	0.2	0	1	0	0	0	0	0	0	0	0	0	0	0	0	0	0	0	0	0	0	0	0	0	0	0	0	0	0	0	0	0	0	0	0
c2630ad3017b18cd6ff1976180b03afd9515c748	c2630ad3017b18cd6ff1976180b03afd9515c748	Metazoa	1	Arthropoda	0.93	Arachnida	0.83	unclassified_Arachnida	0.79	unclassified_Arachnida	0.77	unclassified_Arachnida	0.77	unclassified_Arachnida_sp	0.77	0	0	0	0	0	0	0	0	0	0	0	0	0	0	0	0	0	0	0	0	0	0	0	0	0	0	0	0	0	0	0	0	0	0
d41307015017739ac29818fb555b55038675104d	d41307015017739ac29818fb555b55038675104d	Metazoa	1	Arthropoda	1	Arachnida	1	Sarcoptiformes	1	Phthiracaridae	1	Phthiracarus	1	Phthiracarus_borealis	0.99	0	0	0	0	0	0	0	0	0	0	0	0	0	0	0	0	0	0	0	0	0	0	3	0	0	0	0	0	0	0	0	5	0	0
d5263b842d35c83325b262be5d39cfbd5f31f1bf	d5263b842d35c83325b262be5d39cfbd5f31f1bf	Metazoa	1	Arthropoda	1	Arachnida	1	Sarcoptiformes	1	Suctobelbidae	1	Suctobelbella	1	Suctobelbella_subcornigera	1	0	0	0	0	0	0	0	0	0	0	0	0	0	0	0	0	0	2	0	0	0	0	0	0	0	0	0	0	0	0	0	0	0	0
dabddd1faa3f0f5fc8e51f800f210cefc4889351	dabddd1faa3f0f5fc8e51f800f210cefc4889351	Metazoa	1	Arthropoda	1	Arachnida	1	Sarcoptiformes	1	unclassified_Sarcoptiformes	0.31	unclassified_Sarcoptiformes	0.23	unclassified_Sarcoptiformes_sp	0.22	0	9	8	5	0	0	0	0	0	0	0	0	0	0	0	0	0	0	0	0	0	0	0	0	0	0	0	0	0	0	0	13	1	0
f327cdf61164187eda055963065c2a2bff09f35d	f327cdf61164187eda055963065c2a2bff09f35d	Metazoa	1	Arthropoda	1	Arachnida	1	Sarcoptiformes	1	Phthiracaridae	1	Phthiracarus	1	Phthiracarus_boresetosus	1	0	0	0	0	0	0	0	0	0	0	0	0	0	1	0	0	0	0	0	0	0	0	0	0	0	0	0	0	0	0	0	0	0	0
f7e82c885d8cd09731f0916e9cf5880ea0f29c2c	f7e82c885d8cd09731f0916e9cf5880ea0f29c2c	Metazoa	1	Arthropoda	1	Arachnida	1	Mesostigmata	1	Parasitidae	1	Lysigamasus	1	Lysigamasus_sp._BOLD:AAF9131	0.98	0	0	0	1	0	0	0	0	0	0	0	0	0	0	0	0	0	0	0	0	0	0	0	0	0	0	0	0	0	0	0	0	0	0
fcacba9504b40a3ec5142cd5cac68b6bc6951b21	fcacba9504b40a3ec5142cd5cac68b6bc6951b21	Metazoa	0.99	Arthropoda	0.96	Arachnida	0.8	unclassified_Arachnida	0.71	unclassified_Arachnida	0.67	unclassified_Arachnida	0.67	unclassified_Arachnida_sp	0.66	0	0	0	0	0	0	0	0	0	0	0	0	0	0	0	0	0	0	0	0	0	0	0	0	0	0	0	0	0	0	0	0	0	0
fe7667584a84412080309c88e72e2dcc06953d49	fe7667584a84412080309c88e72e2dcc06953d49	Metazoa	1	Arthropoda	1	Arachnida	1	Sarcoptiformes	1	Steganacaridae	1	Atropacarus	1	Atropacarus_csiszarae	1	0	0	0	0	0	0	0	0	0	0	0	0	0	0	0	0	0	0	0	0	0	0	3	0	0	0	0	0	0	0	0	0	0	0
fffa194d8ab309003e2936875c28f624df7675fb	fffa194d8ab309003e2936875c28f624df7675fb	Metazoa	0.96	Arthropoda	0.96	Arachnida	0.95	Trombidiformes	0.95	Eriophyidae	0.95	Acalitus	0.95	Acalitus_vaccinii	0.95	78	5	1	15	0	2	0	0	0	0	0	0	0	0	0	0	0	0	0	0	0	0	0	0	0	0	0	0	0	30	2	1	3	0
09c350c435c8108ee4cabe0e8728e3bd4e055e42	#N/A	Metazoa	0.87	Arthropoda	0.87	Arachnida	0.84	Trombidiformes	0.84	Eriophyidae	0.84	Acalitus	0.84	Acalitus_sp	0.84	2	0	0	0	0	0	0	0	0	0	0	0	0	0	0	0	0	0	0	0	0	0	0	0	0	0	0	0	0	0	0	1	0	0
9f69640270c097a96dbd05733475f7419ff0bf33	#N/A	Metazoa	0.97	Arthropoda	0.97	Arachnida	0.97	Trombidiformes	0.97	Eriophyidae	0.96	Acalitus	0.96	Acalitus_vaccinii	0.96	1	0	0	0	0	0	0	0	0	0	0	0	0	0	0	0	0	0	0	0	0	0	0	0	0	0	0	0	0	0	0	0	0	0
ccd7b6c220d93f6461bceef9b66f719a8870196a	#N/A	Metazoa	1	Arthropoda	1	Insecta	1	Hemiptera	1	Tingidae	1	Acalypta	1	Acalypta_carinata	1	0	0	0	0	0	0	0	0	0	0	0	0	0	0	0	0	0	0	0	0	0	0	0	0	0	0	0	0	0	0	1	0	0	0
b71e98dce9421d57c2c1b11f94d02a2afe2c628c	#N/A	Metazoa	1	Arthropoda	1	Insecta	1	Hemiptera	1	Tingidae	1	Acalypta	1	Acalypta_carinata	1	0	1	0	0	0	1	0	0	66	0	0	0	0	0	1	1	0	0	0	0	0	0	0	0	0	0	0	0	0	0	7	0	0	0
2144277b5f16f7725d09f5d50fd22d9af971a001	#N/A	Metazoa	0.99	Arthropoda	0.99	Insecta	0.99	Hemiptera	0.99	Tingidae	0.99	Acalypta	0.99	Acalypta_carinata	0.99	0	0	0	0	0	0	0	0	1	0	0	0	0	0	0	0	0	0	0	0	0	0	0	0	0	0	0	0	0	0	0	0	0	0
4b80790544ec3c38d5dd09aa3904b69965baa652	#N/A	Metazoa	1	Rotifera	1	Eurotatoria	1	Adinetida	1	Adinetidae	1	Adineta	1	Adineta_barbata	1	0	0	0	1	0	0	0	0	0	0	0	0	0	0	0	0	0	0	0	0	0	0	0	0	0	0	0	0	0	0	0	0	0	0
afd5afe1e5254390e65440656249abb746375af5	#N/A	Metazoa	1	Rotifera	1	Eurotatoria	1	Adinetida	1	Adinetidae	1	Adineta	1	Adineta_barbata	1	0	0	0	0	1	0	0	0	0	0	0	0	0	0	0	0	0	0	0	0	0	0	0	0	0	0	0	0	0	0	0	0	0	0
d60cd24e9e38325a6540a6e5bc0011460d9dac9f	#N/A	Metazoa	1	Rotifera	1	Eurotatoria	1	Adinetida	1	Adinetidae	1	Adineta	1	Adineta_barbata	1	0	0	0	0	1	0	0	0	0	0	0	0	0	0	0	0	0	0	0	0	0	0	0	0	0	0	0	0	0	0	0	0	0	0
270eba26cca17357a0a8c010ac5d4e43dfcfd92a	#N/A	Metazoa	1	Rotifera	1	Eurotatoria	1	Adinetida	1	Adinetidae	1	Adineta	1	Adineta_barbata	1	7	0	6	0	1	0	0	0	0	0	0	0	0	0	0	0	0	0	0	0	0	0	1	0	0	0	0	0	0	0	0	0	0	0
59139066418b7c86aab2f64da483be409b2c6d45	#N/A	Metazoa	1	Rotifera	1	Eurotatoria	1	Adinetida	0.95	Adinetidae	0.95	Adineta	0.95	Adineta_sp	0.92	1	0	0	0	0	0	0	0	0	0	0	0	0	0	0	0	0	0	0	0	0	0	0	0	0	0	0	0	0	0	0	0	0	0
755f49007693ac1387508aab17126997b41859c8	#N/A	Metazoa	1	Rotifera	1	Eurotatoria	1	Adinetida	0.94	Adinetidae	0.94	Adineta	0.94	Adineta_sp	0.94	0	0	0	0	0	0	0	1	0	0	0	0	0	0	0	0	0	0	0	0	0	0	0	0	0	0	0	0	0	0	0	0	0	0
a77e8387b8b3032460740a09d17fe322bc8a46db	#N/A	Metazoa	1	Rotifera	1	Eurotatoria	1	Adinetida	0.94	Adinetidae	0.94	Adineta	0.94	Adineta_sp	0.94	0	0	0	0	0	0	0	0	0	0	0	0	0	0	0	0	0	0	0	0	0	0	0	0	0	0	0	0	0	0	0	0	0	0
cb335307765d5ebef2d698ff4974beb7d4f0cdd0	#N/A	Metazoa	1	Rotifera	1	Eurotatoria	1	Adinetida	0.92	Adinetidae	0.92	Adineta	0.92	Adineta_sp	0.92	0	0	0	0	0	0	0	0	0	0	0	0	0	0	0	0	0	0	0	0	0	0	0	0	0	0	0	0	0	0	0	0	0	0
ff4aba809828da620ce0373d9d6c6cb182cad12e	#N/A	Metazoa	1	Rotifera	1	Eurotatoria	1	Adinetida	0.92	Adinetidae	0.92	Adineta	0.92	Adineta_sp	0.92	0	0	0	0	0	0	0	0	0	0	0	0	0	0	0	0	0	0	0	0	0	0	0	0	0	0	0	0	0	1	0	0	0	0
72e81c0b9af21941f27df7fddeb194a4aca052a3	#N/A	Metazoa	1	Rotifera	1	Eurotatoria	1	Adinetida	0.91	Adinetidae	0.91	Adineta	0.91	Adineta_sp	0.91	0	0	0	0	0	0	0	0	0	0	0	0	0	0	0	0	1	0	0	0	0	0	0	0	0	0	0	0	0	0	0	0	0	0
5686c465c1502f431509dc83c2290b59d6aa663f	#N/A	Metazoa	1	Rotifera	1	Eurotatoria	1	Adinetida	0.9	Adinetidae	0.9	Adineta	0.9	Adineta_sp	0.9	0	0	0	0	0	0	0	0	0	0	0	2	0	0	0	0	0	0	0	0	0	0	0	0	0	0	0	0	0	0	0	0	0	0
3e6c27ce7b0c63deab787f57195b9d93e2833802	#N/A	Metazoa	1	Rotifera	1	Eurotatoria	1	Adinetida	0.89	Adinetidae	0.89	Adineta	0.89	Adineta_sp	0.89	0	0	16	1	0	0	0	1	0	0	0	1	9	0	10	20	1	0	0	0	0	3	8	0	0	0	0	0	0	0	0	0	0	0
079aa250ea575ccf9e1f0c9b5548e47643df6b7c	#N/A	Metazoa	1	Rotifera	1	Eurotatoria	1	Adinetida	0.89	Adinetidae	0.89	Adineta	0.89	Adineta_sp	0.88	1	0	2	0	0	0	0	1	0	0	0	0	0	0	0	0	0	0	0	0	0	0	0	0	3	0	0	0	0	0	0	0	0	0
c73d29b97f2a8e5f83f9b4b75a0b2a5d2d8ac2fb	#N/A	Metazoa	1	Rotifera	1	Eurotatoria	1	Adinetida	0.88	Adinetidae	0.88	Adineta	0.88	Adineta_sp	0.88	0	0	0	0	0	0	0	0	0	0	0	0	0	1	0	0	0	0	0	0	0	0	0	0	0	0	0	0	0	0	0	0	0	0
6ff3c7b5287bd3501c6490068ed5b459d0b6d590	#N/A	Metazoa	1	Rotifera	1	Eurotatoria	1	Adinetida	0.87	Adinetidae	0.87	Adineta	0.87	Adineta_sp	0.87	0	0	0	0	0	0	0	0	0	0	0	0	0	0	0	0	0	1	0	0	0	0	0	0	0	0	0	0	0	0	0	0	0	0
a1f874a115022fcb0ab391ee4a345f032bf289ce	#N/A	Metazoa	1	Rotifera	1	Eurotatoria	1	Adinetida	0.87	Adinetidae	0.87	Adineta	0.87	Adineta_sp	0.87	0	0	0	3	0	0	0	3	0	0	0	0	0	0	0	0	0	0	0	0	0	0	0	1	0	0	0	0	0	0	0	1	13	0
6fd254c466bb7a70a2d21a3de64e0a730edb2113	#N/A	Metazoa	1	Rotifera	0.86	Eurotatoria	0.86	Adinetida	0.86	Adinetidae	0.86	Adineta	0.86	Adineta_sp	0.86	1	0	0	0	0	0	0	0	0	0	0	0	0	0	0	0	0	0	0	0	0	0	0	0	0	0	0	0	0	0	0	0	0	0
8f41aec1884c82c1b8d9dee0e5e5c3e6273686dd	#N/A	Metazoa	1	Rotifera	1	Eurotatoria	1	Adinetida	0.84	Adinetidae	0.84	Adineta	0.84	Adineta_sp	0.84	0	0	0	0	0	0	1	0	0	0	0	0	0	0	0	0	0	0	0	0	0	0	0	0	0	0	0	0	0	0	0	0	0	0
4b4c0b9be73c93ca5796a97a491f30fb111e673a	#N/A	Metazoa	1	Rotifera	1	Eurotatoria	1	Adinetida	0.84	Adinetidae	0.84	Adineta	0.84	Adineta_sp	0.82	0	0	0	0	0	0	1	0	0	0	0	0	0	0	0	0	0	0	0	0	0	0	0	0	0	0	0	0	0	0	0	0	0	0
c0f4cc021d39152fc2b5d320b2df5d3c9b08ea08	#N/A	Metazoa	1	Rotifera	1	Eurotatoria	1	Adinetida	0.83	Adinetidae	0.83	Adineta	0.83	Adineta_sp	0.83	0	0	0	0	0	0	0	0	0	0	0	0	0	0	0	0	0	0	1	0	0	0	0	0	0	0	0	0	0	0	0	0	0	0
b246d7f48472120b4f60611866150e6a2eef89a4	#N/A	Metazoa	1	Rotifera	1	Eurotatoria	1	Adinetida	0.82	Adinetidae	0.82	Adineta	0.82	Adineta_sp	0.82	0	0	0	0	0	0	0	0	0	0	0	0	0	0	0	0	0	0	0	0	0	0	0	0	0	0	0	0	0	0	0	1	0	0
22ec18f53200a3238407fea453dc84e1ef03af43	#N/A	Metazoa	1	Rotifera	1	Eurotatoria	1	Adinetida	0.81	Adinetidae	0.81	Adineta	0.81	Adineta_sp	0.81	0	0	0	0	0	0	0	0	0	0	0	0	0	0	0	0	0	1	0	0	0	0	0	0	0	0	0	0	0	0	0	0	0	0
d4a467bd12578e30bb65fa53d50f3d6d33da1f0f	#N/A	Metazoa	1	Rotifera	1	Eurotatoria	1	Adinetida	0.81	Adinetidae	0.81	Adineta	0.81	Adineta_sp	0.81	0	0	0	0	0	0	0	0	0	0	0	0	0	0	0	0	0	0	0	0	0	0	0	0	0	0	0	0	0	4	0	0	0	0
2716a7e6c809ef942fc52436db3a5429e8715f5e	#N/A	Metazoa	1	Rotifera	1	Eurotatoria	1	Adinetida	0.81	Adinetidae	0.81	Adineta	0.81	Adineta_sp	0.81	0	0	0	0	0	0	0	0	0	0	0	0	0	0	0	1	0	0	0	0	0	0	0	0	0	0	0	0	0	0	0	0	0	0
83ee34afb7c6fdbc5fc391a8ebc87dc9278286ee	#N/A	Metazoa	1	Rotifera	1	Eurotatoria	1	Adinetida	1	Adinetidae	1	Adineta	1	Adineta_steineri	1	1	0	0	0	0	0	0	0	0	0	0	0	0	0	0	0	0	0	0	0	0	0	0	0	0	0	0	0	0	0	0	0	0	0
30454c81547329429e9c99620c3c553b20a035cd	#N/A	Metazoa	1	Rotifera	1	Eurotatoria	1	Adinetida	1	Adinetidae	1	Adineta	1	Adineta_steineri	1	82	4	0	0	0	2	0	0	0	0	0	0	0	0	0	0	0	0	0	0	0	0	0	0	0	0	0	0	0	3	0	0	0	0
b4dce01a4ed044d7311932b237f53b0622146a77	#N/A	Metazoa	1	Rotifera	1	Eurotatoria	1	Adinetida	1	Adinetidae	1	Adineta	1	Adineta_vaga	1	0	0	0	0	0	0	0	0	0	0	0	0	0	0	0	0	0	0	0	0	0	0	0	0	0	0	0	0	0	1	0	0	0	0
6548583133cc8bd4f6e0127b0eb6a203fb2453db	#N/A	Metazoa	1	Rotifera	1	Eurotatoria	1	Adinetida	1	Adinetidae	1	Adineta	1	Adineta_vaga	1	0	5	13	0	0	0	0	13	2	0	0	4	0	0	0	1	0	1	0	1	0	0	0	4	0	1	0	0	0	1	0	0	0	0
8f5154ad234cc690ef235e3ae72766f809850468	#N/A	Metazoa	1	Rotifera	1	Eurotatoria	1	Adinetida	0.99	Adinetidae	0.99	Adineta	0.99	Adineta_vaga	0.99	0	0	0	0	1	0	0	0	0	0	0	0	0	0	0	0	0	0	0	0	0	0	0	0	0	0	0	0	0	0	0	0	0	0
0ca66c8f51a9347e9134c4702da7ad952afc06f1	#N/A	Metazoa	1	Rotifera	1	Eurotatoria	1	Adinetida	0.98	Adinetidae	0.98	Adineta	0.98	Adineta_vaga	0.98	0	0	1	0	0	0	0	0	0	0	0	0	0	0	0	0	0	0	0	0	0	0	0	0	0	0	0	0	0	0	0	0	0	0
52288b345a9d9beb0d38b84292460b645502b816	#N/A	Metazoa	1	Rotifera	1	Eurotatoria	1	Adinetida	0.97	Adinetidae	0.97	Adineta	0.97	Adineta_vaga	0.97	0	0	1	0	0	0	0	0	0	0	0	0	0	0	0	0	0	0	0	0	0	0	0	0	0	0	0	0	0	0	0	0	0	0
582388bf886398b68eb3d213b333c4868d0d57fe	#N/A	Metazoa	1	Rotifera	1	Eurotatoria	1	Adinetida	0.97	Adinetidae	0.97	Adineta	0.97	Adineta_vaga	0.97	0	1	0	1	0	0	0	0	0	0	0	0	0	0	0	0	0	0	0	0	0	0	0	0	0	0	0	0	0	0	0	0	0	0
27e781360de0fc1f4d4591c3978614883b1e84ae	#N/A	Metazoa	1	Rotifera	1	Eurotatoria	1	Adinetida	0.97	Adinetidae	0.97	Adineta	0.97	Adineta_vaga	0.97	0	0	0	0	0	0	0	0	0	0	0	2	0	0	0	3	0	0	0	0	0	0	0	0	0	0	0	0	0	0	0	0	0	0
912d8238c6a0bf3072ff5f305eada0dd49a1b2cd	#N/A	Metazoa	1	Rotifera	1	Eurotatoria	1	Adinetida	0.96	Adinetidae	0.96	Adineta	0.96	Adineta_vaga	0.96	0	0	0	0	0	0	0	0	1	0	0	0	0	0	0	0	0	0	0	0	0	0	0	0	0	0	0	0	0	0	0	0	0	0
197660e6743c2dfda01d45a7d1dc57c1f21e32fb	#N/A	Metazoa	1	Rotifera	1	Eurotatoria	1	Adinetida	0.95	Adinetidae	0.95	Adineta	0.95	Adineta_vaga	0.95	0	0	0	0	0	0	0	0	0	1	0	0	0	0	0	0	0	0	0	0	0	0	0	0	0	0	0	0	0	0	0	0	0	0
ed136e2b9678913395392b1a8edba54433a88c21	#N/A	Metazoa	1	Arthropoda	1	Collembola	1	Symphypleona	1	Sminthuridae	1	Allacma	1	Allacma_fusca	1	0	0	0	1	0	3	162	0	0	0	0	0	0	0	0	0	0	0	0	0	0	0	0	0	0	0	0	0	0	0	0	0	0	2
5e52f3e067f6804730569fc58a97a9c880981ecd	#N/A	Metazoa	0.99	Arthropoda	0.99	Collembola	0.95	Symphypleona	0.95	Sminthuridae	0.95	Allacma	0.95	Allacma_fusca	0.95	0	0	0	0	0	0	1	0	0	0	0	0	0	0	0	0	0	0	0	0	0	0	0	0	0	0	0	0	0	0	0	0	0	0
afe6323876949c8835a263d5a62c8806b40f39df	#N/A	Metazoa	1	Arthropoda	1	Insecta	1	Hemiptera	1	Cicadellidae	1	Anoscopus	1	Anoscopus_albiger	1	0	0	0	0	0	0	0	0	0	0	0	0	0	0	0	0	0	0	0	0	0	0	0	0	0	0	0	0	0	0	0	0	0	0
fb877278e034e7ab6dd11b7f395076e68636feb5	#N/A	Metazoa	1	Arthropoda	1	Insecta	1	Hemiptera	1	Cicadellidae	1	Anoscopus	1	Anoscopus_albiger	1	0	0	0	0	0	0	0	0	0	0	0	0	0	0	0	0	0	0	0	0	0	0	0	0	0	0	0	0	0	0	0	0	0	0
15be4fdb6d4ef714106fe41792bcba462207dcd0	#N/A	Metazoa	1	Arthropoda	1	Insecta	1	Hemiptera	1	Cicadellidae	1	Anoscopus	1	Anoscopus_albiger	0.96	0	0	0	0	0	0	1	0	0	0	0	0	0	0	0	0	0	0	0	0	0	0	0	0	0	0	0	0	0	0	0	0	0	0
7f8a0c20da7f680696ec495903eabbf419e87db6	#N/A	Metazoa	1	Arthropoda	1	Insecta	1	Hemiptera	1	Cicadellidae	1	Anoscopus	1	Anoscopus_flavostriatus	1	0	0	2	0	0	0	0	0	0	0	0	0	0	0	0	0	0	0	0	0	0	0	0	0	0	0	0	0	0	0	0	0	0	0
c4872da25a6d9043fdfb136d91d25366af5370d2	#N/A	Metazoa	1	Arthropoda	1	Insecta	1	Hemiptera	1	Cicadellidae	1	Anoscopus	1	Anoscopus_sp	0.71	0	0	0	0	0	0	0	0	0	0	0	0	0	0	0	0	0	0	0	0	0	0	0	0	0	0	0	0	0	0	1	0	0	0
785dc36403769c4a26b94b53ad431e98e6e1f1e2	#N/A	Metazoa	1	Arthropoda	1	Insecta	1	Hymenoptera	1	Dryinidae	1	Anteon	1	Anteon_gaullei	1	0	0	1	0	0	0	0	0	0	0	0	0	0	0	0	0	0	0	0	0	0	0	0	0	0	0	0	0	0	0	0	9	0	0
94257c02beb5de39e95c80e25061a72e9c447bb8	#N/A	Metazoa	0.9	Arthropoda	0.9	Insecta	0.9	Hymenoptera	0.9	Dryinidae	0.9	Anteon	0.9	Anteon_sp	0.73	0	0	1	0	0	0	0	0	0	0	0	0	0	0	0	0	0	0	0	0	0	0	0	0	0	0	0	0	0	0	0	0	0	0
d5802a3e97caad52aa2fde58e9d0f8bca1f9105f	#N/A	Metazoa	1	Nematoda	1	Chromadorea	1	Rhabditida	1	Aphelenchoididae	1	Aphelenchoides	1	Aphelenchoides_bicaudatus	1	0	0	0	1	0	0	0	1	0	0	0	0	0	0	0	0	0	0	0	1	0	0	0	1	1	0	1	3	0	3	0	1	0	0
5c7fe042cc52fd01f234f96f796b597e1dd51dd1	#N/A	Metazoa	1	Annelida	1	Clitellata	1	Crassiclitellata	1	Lumbricidae	1	Aporrectodea	1	Aporrectodea_longa	1	0	0	0	0	0	0	0	0	0	0	0	0	0	0	0	0	0	0	0	0	0	0	0	0	0	0	0	0	0	2	0	0	0	0
fe87bbe5deac6a1876a0dfb29cfaf09542b2bbae	#N/A	Metazoa	1	Annelida	1	Clitellata	1	Crassiclitellata	1	Lumbricidae	1	Aporrectodea	1	Aporrectodea_longa	1	0	0	0	0	0	0	0	0	0	0	0	0	0	0	0	0	0	0	0	0	0	0	0	0	0	0	0	0	0	5363	0	0	0	0
ab5814729a830e89316ac865895bae7041da1369	#N/A	Metazoa	1	Annelida	0.99	Clitellata	0.99	Crassiclitellata	0.99	Lumbricidae	0.99	Aporrectodea	0.99	Aporrectodea_longa	0.99	0	0	0	0	0	0	0	0	0	1	0	0	0	0	0	0	0	0	0	0	0	0	0	0	0	0	0	0	0	0	0	0	0	0
dbd82bc8dd207f1ff5c939ad90a7112a8c88bc7a	#N/A	Metazoa	1	Annelida	1	Clitellata	1	Crassiclitellata	1	Lumbricidae	1	Aporrectodea	1	Aporrectodea_rosea	1	0	0	0	0	0	0	0	0	0	0	0	0	0	0	0	0	0	0	0	0	0	0	0	0	0	0	0	0	0	0	0	0	0	0
c752a7ff13f429f38aab00107da0c2e0b8af6f9f	#N/A	Metazoa	1	Annelida	1	Clitellata	1	Crassiclitellata	1	Lumbricidae	1	Aporrectodea	1	Aporrectodea_rosea	1	0	0	0	0	0	0	0	0	0	1	0	0	0	0	0	0	0	0	0	0	0	0	0	0	0	0	0	0	0	0	0	0	0	0
1020347f5817b73524bdca7f07ee9d13c6f50fc3	#N/A	Metazoa	1	Annelida	1	Clitellata	1	Crassiclitellata	1	Lumbricidae	1	Aporrectodea	1	Aporrectodea_rosea	1	0	0	0	0	0	0	0	0	0	4	0	0	0	0	0	0	0	0	0	0	0	0	0	0	0	0	0	0	0	0	0	0	0	0
427390afedbd6b6d964c7035f7151aef27775731	#N/A	Metazoa	1	Annelida	1	Clitellata	1	Crassiclitellata	1	Lumbricidae	1	Aporrectodea	1	Aporrectodea_rosea	1	0	0	0	0	0	0	0	0	0	50	0	0	0	0	0	0	0	0	0	0	0	0	0	0	0	0	0	0	0	0	0	0	0	0
0f849bb844d86ad17eb8e66a2620f0489be23afc	#N/A	Metazoa	1	Annelida	1	Clitellata	1	Crassiclitellata	1	Lumbricidae	1	Aporrectodea	1	Aporrectodea_rosea	1	0	0	0	0	0	0	0	0	0	21	0	3	0	0	0	0	0	0	0	0	0	0	0	0	0	0	0	0	0	0	0	0	0	0
e8f377184b7d681df03bcf00f91023f0a1942168	#N/A	Metazoa	0.99	Annelida	0.94	Clitellata	0.93	Crassiclitellata	0.93	Lumbricidae	0.93	Aporrectodea	0.93	Aporrectodea_sp	0.93	0	0	0	0	0	0	0	0	0	0	0	0	0	0	0	0	0	0	0	0	0	0	0	0	0	0	0	0	0	0	0	0	0	0
a696c57d41eed2a4beccd92327f27f227b036ffa	#N/A	Metazoa	0.99	Annelida	0.93	Clitellata	0.93	Crassiclitellata	0.93	Lumbricidae	0.93	Aporrectodea	0.92	Aporrectodea_sp	0.71	0	0	0	0	0	0	0	0	0	0	0	0	0	0	0	0	0	0	0	0	0	0	0	0	0	0	0	0	0	1	0	0	0	0
ac8344971a5b5dc439fd23cc09aa5b2ca4e1e4df	#N/A	Metazoa	1	Annelida	0.94	Clitellata	0.93	Crassiclitellata	0.92	Lumbricidae	0.91	Aporrectodea	0.91	Aporrectodea_sp	0.91	0	0	0	0	0	0	0	0	0	0	0	0	0	0	0	0	0	0	0	0	0	0	0	0	0	0	0	0	0	0	0	0	0	0
1379d74fd18c732fe101f535117e76539ddaab76	#N/A	Metazoa	1	Mollusca	1	Gastropoda	1	Stylommatophora	1	Helicidae	1	Arianta	1	Arianta_arbustorum	1	0	0	0	0	0	0	0	0	0	0	0	22	0	0	0	0	0	0	0	1	0	0	0	0	0	0	0	0	0	0	0	0	0	0
de27574e21016afe61b8e5d9104822d066424d3e	#N/A	Metazoa	1	Arthropoda	1	Arachnida	1	Sarcoptiformes	1	Steganacaridae	1	Atropacarus	1	Atropacarus_sp	0.9	0	0	0	0	0	0	0	0	0	0	0	0	0	0	0	0	0	9	0	1	0	0	0	6	0	0	0	0	0	0	0	0	0	0
2164c11153b0788cce7a92ef0f85a4e1cc3883dd	#N/A	Metazoa	1	Arthropoda	1	Insecta	1	Coleoptera	1	Carabidae	1	Badister	1	Badister_lacertosus	1	0	0	0	0	0	0	0	0	0	0	0	0	0	0	0	0	0	0	0	0	0	0	0	0	0	0	0	0	0	0	1	0	0	0
12f9063563e9d015622bbaf54558e3dcb5c12256	#N/A	Metazoa	1	Arthropoda	1	Insecta	1	Coleoptera	1	Curculionidae	1	Barypeithes	1	Barypeithes_pellucidus	1	0	0	0	3	0	0	0	0	0	0	0	0	0	0	0	0	0	0	0	0	0	0	0	0	0	0	0	0	0	0	0	0	0	0
7c7e8da770d3588b8be32fe9b6e6fe4a824ad492	#N/A	Metazoa	1	Arthropoda	1	Insecta	1	Coleoptera	1	Curculionidae	1	Barypeithes	1	Barypeithes_pellucidus	1	0	0	0	0	56	0	0	0	0	0	0	0	0	0	0	0	0	0	0	0	0	0	0	0	0	0	0	0	0	0	0	0	0	0
d859b8608c350011733003134092357d7c034c31	#N/A	Metazoa	1	Arthropoda	1	Insecta	1	Diptera	1	Bibionidae	1	Bibio	1	Bibio_clavipes	1	0	0	0	0	0	0	0	0	0	0	0	0	0	0	0	0	0	0	0	0	0	0	0	0	0	0	0	0	0	0	0	0	0	0
faefd3a696ea1147757b0f4f8a94cb42ecfe44e8	#N/A	Metazoa	1	Arthropoda	1	Collembola	1	Poduromorpha	1	Brachystomellidae	1	Brachystomella	1	Brachystomella_parvula	1	0	0	0	0	0	0	0	0	0	0	0	0	0	0	0	0	0	0	0	0	0	0	0	0	0	0	0	0	0	1	0	0	0	0
91bb6adbfa4448c414e53777bbfa84be0ae2d2aa	#N/A	Metazoa	1	Arthropoda	1	Collembola	1	Poduromorpha	1	Brachystomellidae	1	Brachystomella	1	Brachystomella_parvula	1	0	0	0	0	0	0	0	0	0	0	0	0	0	0	0	0	0	0	0	0	0	0	0	1	0	18	1	0	1	0	0	0	0	0
e35a254eb0ce702a1ccaad1f16073babd101f536	#N/A	Metazoa	1	Arthropoda	1	Insecta	1	Diptera	1	Sciaridae	1	Bradysia	1	Bradysia_nitidicollis	1	0	0	0	0	0	0	0	0	0	0	0	0	0	0	0	0	0	0	0	0	0	0	0	2	0	0	22	0	0	0	0	0	0	0
02110899025e299f1b424d85fe20f2ae0892edd3	#N/A	Metazoa	1	Arthropoda	1	Insecta	1	Diptera	1	Chironomidae	1	Bryophaenocladius	1	Bryophaenocladius_xanthogyne	1	0	0	0	0	0	0	0	0	0	0	0	0	0	0	0	4	0	0	0	0	0	0	0	0	0	0	0	0	0	0	0	0	0	0
082482b96543fa77a7954b58af103ab96cf94eb2	#N/A	Metazoa	1	Annelida	1	Clitellata	1	Enchytraeida	1	Enchytraeidae	1	Buchholzia_segmented_worms	1	Buchholzia_appendiculata	1	0	0	0	0	0	0	0	0	0	0	0	0	0	0	0	0	0	0	0	0	0	0	0	0	0	0	0	0	0	0	0	0	0	0
2cbd0f47cf60ba62118a7355ef5498608847cf0b	#N/A	Metazoa	1	Annelida	1	Clitellata	1	Enchytraeida	1	Enchytraeidae	1	Buchholzia_segmented_worms	1	Buchholzia_appendiculata	1	0	0	0	0	0	0	0	0	0	0	0	0	0	0	0	0	0	0	0	0	0	0	0	0	0	0	0	0	0	0	0	0	0	0
d27ede9bdb3ef6abb4fcf658c6c4e837cb212fef	#N/A	Metazoa	1	Annelida	1	Clitellata	1	Enchytraeida	1	Enchytraeidae	1	Buchholzia_segmented_worms	1	Buchholzia_appendiculata	1	0	0	0	0	0	0	0	0	0	0	0	0	0	0	0	0	8	9	1	0	0	0	0	1	0	0	0	0	0	0	0	0	0	0
40ba3beeb77b10804cfc3223be867347d27cd393	#N/A	Metazoa	1	Annelida	1	Clitellata	1	Enchytraeida	1	Enchytraeidae	1	Buchholzia_segmented_worms	1	Buchholzia_appendiculata	1	0	0	0	0	0	0	0	0	0	0	0	1	0	0	2	0	25	0	1	0	0	0	0	0	0	0	0	0	0	0	0	0	0	0
3e880a797c73aab73cbeab007062ecde25a10ce3	#N/A	Metazoa	1	Annelida	0.96	Clitellata	0.96	Enchytraeida	0.95	Enchytraeidae	0.95	Buchholzia_segmented_worms	0.95	Buchholzia_appendiculata	0.95	0	0	0	0	0	0	0	0	0	0	0	0	0	0	0	0	1	0	0	0	0	0	0	0	0	0	0	0	0	0	0	0	0	0
c64b7bfc9191d025419f19e3eeaa440f48a2f753	#N/A	Metazoa	1	Arthropoda	1	Insecta	1	Diptera	0.86	Cecidomyiidae	0.82	Campylomyza	0.81	Campylomyza_sp	0.39	0	0	0	0	0	0	0	0	0	0	0	0	0	0	0	0	0	0	0	0	0	0	0	0	0	0	0	0	0	0	0	0	0	0
ee36afdc2e3af8a227d9e7475d5e90d106906258	#N/A	Metazoa	1	Mollusca	1	Gastropoda	1	Ellobiida	1	Ellobiidae	1	Carychium	1	Carychium_tridentatum	1	0	0	0	0	0	0	0	0	0	0	0	0	0	0	0	0	0	0	0	0	0	0	0	0	0	0	0	0	0	0	0	0	0	8
aa3bc217bbc4cc23ab74e5119d57521c1554c439	#N/A	Metazoa	1	Annelida	1	Clitellata	1	Enchytraeida	1	Enchytraeidae	1	Chamaedrilus	1	Chamaedrilus_sphagnetorum	1	0	0	0	0	0	0	0	0	0	0	0	0	0	0	0	0	0	0	1	0	0	0	0	0	0	0	0	0	0	0	0	0	0	0
acb841c742ab6eb31bbb0f7d960f196e3c6fb0c4	#N/A	Metazoa	1	Annelida	1	Clitellata	1	Enchytraeida	1	Enchytraeidae	1	Chamaedrilus	1	Chamaedrilus_sphagnetorum	1	0	0	0	0	0	0	0	0	0	0	0	0	0	0	0	0	0	0	0	0	0	0	3	0	0	0	0	0	0	0	0	0	0	0
0a83372c24d13fc6cc1c6b0d7b9fbc83af32ee54	#N/A	Metazoa	1	Arthropoda	1	Arachnida	1	Sarcoptiformes	1	Chamobatidae	0.93	Chamobates	0.93	Chamobates_sp	0.93	1	0	0	0	0	0	0	4	0	0	0	0	0	0	0	1	0	0	0	0	0	0	0	0	0	0	0	0	0	0	0	0	0	0
2f4a550b3e68f9edc453988bac567e2c3c3900b8	#N/A	Metazoa	0.95	Gastrotricha	0.81	undef_Gastrotricha	0.81	Macrodasyida	0.81	Thaumastodermatidae	0.81	Chimaeradasys	0.81	Chimaeradasys_sp	0.81	0	0	0	0	0	0	0	0	0	0	0	0	0	0	0	0	0	0	0	0	0	0	0	0	0	0	0	0	0	0	0	0	0	3
133fa08c80659d52e917cb57c4850f756e937876	#N/A	Metazoa	1	Arthropoda	1	Insecta	1	Diptera	1	Sciaridae	1	Corynoptera	1	Corynoptera_furcifera	1	0	0	0	0	0	0	0	0	0	0	0	1	0	0	0	0	0	0	0	0	0	0	0	0	0	0	0	0	0	0	0	0	0	0
0f05cd7ca7427d016a7ac7e78a0513596eb333b0	#N/A	Metazoa	1	Arthropoda	1	Insecta	1	Diptera	1	Sciaridae	1	Corynoptera	1	Corynoptera_hypopygialis	1	0	0	0	0	0	0	0	0	0	0	0	0	0	0	0	0	0	0	0	0	0	0	0	0	0	0	0	0	0	0	0	0	0	0
c0a5ae03e48e5902edec3eab4ee8567a8466ef92	#N/A	Metazoa	1	Arthropoda	1	Insecta	1	Diptera	1	Sciaridae	1	Cratyna	1	Cratyna_vagabunda	1	0	1	0	0	0	0	0	0	0	0	0	0	0	0	0	0	0	0	0	0	0	0	0	0	0	0	0	0	0	0	0	0	0	0
0c51d537d3a8967742ff27b9faa544ac2938d02c	#N/A	Metazoa	1	Arthropoda	1	Diplopoda	1	Julida	1	Julidae	1	Cylindroiulus	1	Cylindroiulus_caeruleocinctus	1	0	48	0	0	0	0	0	0	0	0	0	0	0	0	0	0	0	0	0	0	0	0	0	0	0	0	0	0	0	1	8	0	0	0
d8af404b808ec8f92fca3bbe8d038e395a90259a	#N/A	Metazoa	1	Arthropoda	1	Insecta	1	Coleoptera	1	Byrrhidae	1	Cytilus	1	Cytilus_sericeus	1	0	0	0	0	0	0	0	0	2	0	0	0	0	0	0	0	0	0	0	0	0	0	0	0	0	0	0	0	0	0	0	0	0	0
0978f4c96c658e82c936098056f04496069c0deb	#N/A	Metazoa	1	Arthropoda	1	Insecta	1	Coleoptera	1	Elateridae	1	Dalopius	1	Dalopius_marginatus	1	0	0	0	3	0	0	0	0	0	0	0	0	0	0	0	0	0	0	0	0	0	0	0	0	0	0	0	0	0	0	0	0	0	0
0096b0306c8c5ef4b63c99680e6a56554b736c8b	#N/A	Metazoa	1	Arthropoda	1	Insecta	1	Coleoptera	1	Elateridae	1	Dalopius	1	Dalopius_sp	0.38	0	0	0	0	0	0	0	0	0	0	0	0	0	0	0	0	0	0	0	0	0	0	0	0	0	0	0	0	0	0	0	0	0	0
bffb8621ecd4c718704dded12a771b2080904171	#N/A	Metazoa	1	Arthropoda	1	Insecta	1	Coleoptera	1	Elateridae	1	Dalopius	0.98	Dalopius_sp	0.45	0	0	0	1	0	0	0	0	0	0	0	0	0	0	0	0	0	0	0	0	0	0	0	0	0	0	0	0	0	0	0	0	0	0
11307d78a7e774d541f9dc4398200f346a8ae69d	#N/A	Metazoa	1	Arthropoda	1	Arachnida	1	Sarcoptiformes	1	Damaeidae	1	Damaeus	1	Damaeus_riparius	1	0	0	0	0	0	0	0	0	0	0	0	0	0	0	0	0	0	0	0	0	0	0	0	0	0	0	0	0	0	0	0	0	0	0
98ac6b84b6fe40e0110f581e1539639a007fba34	#N/A	Metazoa	1	Annelida	1	Clitellata	1	Crassiclitellata	1	Lumbricidae	1	Dendrobaena	1	Dendrobaena_octaedra	1	0	0	0	0	0	0	0	0	0	0	0	0	0	3	0	0	0	0	0	0	0	0	0	0	0	0	0	0	0	0	0	0	0	0
120418a8e53923dc6ee6cf1b8141b99efad0276d	#N/A	Metazoa	1	Annelida	1	Clitellata	1	Crassiclitellata	1	Lumbricidae	1	Dendrobaena	1	Dendrobaena_octaedra	1	0	0	0	0	0	0	0	0	0	0	0	0	0	0	0	0	0	0	0	0	0	0	0	0	0	0	0	0	0	0	0	0	0	0
ab5de05e624065515dc91e03c2a788252ade06af	#N/A	Metazoa	1	Annelida	0.96	Clitellata	0.96	Crassiclitellata	0.96	Lumbricidae	0.96	Dendrobaena	0.96	Dendrobaena_sp	0.59	0	0	0	0	0	0	0	0	0	0	0	0	0	0	0	0	0	0	0	0	0	0	0	0	0	0	0	0	0	0	0	0	0	0
f7f468354761c6773bc1f1570ae9260d4f7c00fd	#N/A	Metazoa	1	Arthropoda	1	Collembola	1	Entomobryomorpha	1	Isotomidae	1	Desoria	1	Desoria_sp	0.6	0	0	0	0	0	0	0	1	0	0	0	0	0	0	0	0	0	0	0	0	0	0	0	0	0	0	0	0	0	0	0	0	0	0
2c1e7a580f4db8e62d301278a76ef94cc63052a5	#N/A	Metazoa	1	Arthropoda	1	Collembola	1	Symphypleona	1	Bourletiellidae	1	Deuterosminthurus	1	Deuterosminthurus_bicinctus	1	0	0	0	0	0	0	0	0	0	0	0	0	3	0	0	0	1	0	0	0	0	0	0	0	0	0	0	0	0	0	0	0	0	0
6921f14822da4525952847152abc6fa24eabd382	#N/A	Metazoa	1	Rotifera	0.93	Eurotatoria	0.93	Philodinida	0.93	Philodinidae	0.9	Didymodactylos	0.87	Didymodactylos_sp	0.87	0	0	0	0	0	0	0	0	0	0	0	0	0	0	0	0	0	0	0	1	0	0	0	0	0	0	0	0	0	0	0	0	0	0
dc8af17f450ebd1d91351ebb52f2b41e44134bd2	#N/A	Metazoa	1	Tardigrada	1	Eutardigrada	1	Parachela_tardigrades	1	Hypsibiidae	1	Diphascon	1	Diphascon_higginsi	1	0	0	0	0	0	0	0	0	0	0	0	0	0	0	0	0	1	0	0	0	0	0	0	0	0	0	0	0	0	0	0	0	0	0
386b1c4cdfdf026b1c4cb3b791062949a147bc24	#N/A	Metazoa	1	Tardigrada	1	Eutardigrada	1	Parachela_tardigrades	1	Hypsibiidae	1	Diphascon	1	Diphascon_higginsi	1	0	0	0	0	0	0	0	0	0	0	0	0	0	0	0	0	0	0	0	0	0	0	0	0	0	1	0	0	0	0	0	0	0	0
71788bd8a797213a3f2d947d8ddea32c4b588dd1	#N/A	Metazoa	1	Tardigrada	1	Eutardigrada	1	Parachela_tardigrades	1	Hypsibiidae	1	Diphascon	1	Diphascon_higginsi	1	0	0	0	0	0	0	0	0	0	0	0	0	0	0	0	0	0	0	0	0	0	0	0	0	2	0	0	0	0	0	0	0	0	0
4fa45161c72d31885793e62bf7686056aaf03c4b	#N/A	Metazoa	0.96	Tardigrada	0.89	Eutardigrada	0.89	Parachela_tardigrades	0.89	Hypsibiidae	0.89	Diphascon	0.89	Diphascon_sp	0.89	0	0	0	0	0	0	0	0	0	0	0	0	0	0	0	0	0	0	0	0	0	0	0	0	0	0	0	0	0	0	0	0	0	0
74715efd5e2141b03cbb7650985344a34933b976	#N/A	Metazoa	1	Arthropoda	1	Insecta	1	Diptera	1	Anthomyiidae	1	Egle	1	Egle_parva	1	0	0	0	0	0	0	3	0	0	0	0	0	0	0	0	0	0	0	0	0	0	0	0	0	0	0	0	0	0	0	0	0	0	0
39cdeb778e591bea7900dc5270c06cac58c959fa	#N/A	Metazoa	1	Annelida	1	Clitellata	1	Enchytraeida	1	Enchytraeidae	1	Enchytraeus	1	Enchytraeus_lacteus	1	0	1	0	0	0	0	0	0	0	0	0	0	0	0	0	0	0	0	0	0	0	0	0	0	0	0	0	0	0	0	0	0	0	0
0561c98c4d0488cba66ab2116e7a8ae3fa2c5872	#N/A	Metazoa	1	Annelida	0.98	Clitellata	0.97	Enchytraeida	0.92	Enchytraeidae	0.92	Enchytraeus	0.9	Enchytraeus_sp	0.75	0	0	0	0	0	0	0	0	0	0	0	0	0	0	1	0	0	0	0	0	0	0	0	0	0	0	0	0	0	0	0	0	0	0
1494710bb8f71f8ad2a945ed3c11f5389f1c38e0	#N/A	Metazoa	1	Annelida	0.99	Clitellata	0.99	Enchytraeida	0.95	Enchytraeidae	0.95	Enchytraeus	0.88	Enchytraeus_sp	0.71	0	0	0	0	0	0	0	0	0	0	0	0	0	0	0	0	0	0	0	0	0	0	0	0	0	0	11	7	1	0	0	0	0	0
4adfd17bae0938be589576801c74bac0e407aed0	#N/A	Metazoa	1	Annelida	1	Clitellata	1	Enchytraeida	0.92	Enchytraeidae	0.92	Enchytraeus	0.84	Enchytraeus_sp	0.83	0	0	0	2	0	0	0	0	0	0	0	0	0	0	0	0	0	0	0	0	0	0	0	0	0	0	0	0	0	0	0	0	0	0
2548487955f07430a25342f9249626e93e0e7d8b	#N/A	Metazoa	1	Annelida	1	Clitellata	1	Enchytraeida	1	Enchytraeidae	1	Enchytronia	1	Enchytronia_parva	1	0	0	0	0	0	0	0	0	0	0	0	0	0	0	0	0	0	0	0	0	0	0	0	0	0	0	0	0	0	0	0	0	0	1
627a93e25ba3db785b36e8c327f69c3a40307066	#N/A	Metazoa	1	Annelida	1	Clitellata	1	Enchytraeida	1	Enchytraeidae	1	Enchytronia	1	Enchytronia_parva	1	0	0	0	0	0	0	0	0	0	0	0	0	0	0	0	0	0	0	0	0	0	0	0	0	0	0	0	0	0	0	0	0	0	0
c165f5cd61d2559dd62588644b5acc3279df9d44	#N/A	Metazoa	1	Annelida	1	Clitellata	1	Enchytraeida	1	Enchytraeidae	1	Enchytronia	1	Enchytronia_parva	1	0	0	0	0	0	0	0	0	0	0	0	0	0	0	0	0	0	0	0	0	0	0	0	0	0	0	0	0	0	0	0	0	0	0
56ba830c9f60d046b1bfced401a0fc1a1a4274a4	#N/A	Metazoa	1	Annelida	1	Clitellata	1	Enchytraeida	1	Enchytraeidae	1	Enchytronia	1	Enchytronia_parva	1	0	0	0	0	0	0	0	0	0	0	0	0	0	0	0	0	0	0	0	2	0	0	0	0	0	0	0	0	0	0	0	0	0	0
c603a2a87c3a039d9712377fdff1c2b92b23132c	#N/A	Metazoa	1	Annelida	1	Clitellata	1	Enchytraeida	1	Enchytraeidae	1	Enchytronia	1	Enchytronia_parva	1	33	13	13	0	0	3	0	0	3	0	5	0	4	15	0	3	11	0	3	0	0	0	0	0	0	0	0	0	0	6	26	0	29	0
c1661cc0ace8a3b55347e6d3a4f60b43a7588cc6	#N/A	Metazoa	1	Annelida	0.99	Clitellata	0.99	Enchytraeida	0.96	Enchytraeidae	0.96	Enchytronia	0.96	Enchytronia_parva	0.96	0	0	0	0	0	0	0	0	0	0	0	0	0	0	0	0	0	0	0	0	0	0	0	0	0	0	0	0	0	1	0	0	0	0
65661f22cfe86eca5ac36851fd6d2ddb14d9460b	#N/A	Metazoa	0.98	Annelida	0.95	Clitellata	0.95	Enchytraeida	0.95	Enchytraeidae	0.95	Enchytronia	0.95	Enchytronia_parva	0.95	0	0	0	0	0	0	0	0	0	0	0	0	0	0	0	0	0	0	0	0	0	0	0	0	0	0	0	0	0	0	0	0	0	0
3a5a619944fbc914248cd71330428d8919d11141	#N/A	Metazoa	1	Arthropoda	1	Insecta	1	Lepidoptera	1	Eriocraniidae	1	Eriocrania	1	Eriocrania_semipurpurella	1	0	0	0	0	0	4	0	0	0	0	0	0	0	0	0	0	0	0	0	0	0	0	0	0	0	0	0	0	0	0	0	0	0	0
1964c5a8afe6c95311a5a39add37fee630754c61	#N/A	Metazoa	1	Arthropoda	1	Arachnida	1	Sarcoptiformes	1	Euzetidae	1	Euzetes	1	Euzetes_globulus	1	0	0	0	0	0	0	0	0	0	0	0	0	0	0	0	0	0	0	1	0	0	0	0	0	0	0	0	0	0	0	0	0	0	1
9c326e4e5795967b2d11c0f3676408d307fb3a27	#N/A	Metazoa	1	Arthropoda	1	Collembola	0.98	Entomobryomorpha	0.98	Isotomidae	0.98	Folsomia	0.98	Folsomia_quadrioculata	0.98	0	0	0	0	0	0	0	0	0	0	0	0	0	0	0	0	0	1	0	0	0	0	0	0	0	0	0	0	0	0	0	0	0	0
12681fe3e282c680e5914059938d517489e8b552	#N/A	Metazoa	1	Annelida	1	Clitellata	1	Enchytraeida	1	Enchytraeidae	1	Fridericia_segmented_worms	1	Fridericia_bulboides	1	0	0	5	0	0	0	0	0	0	0	0	0	0	0	0	0	0	0	0	0	0	0	0	0	0	0	0	0	0	0	0	0	0	0
45ba9bebdde14226d4765f459c41d9913ba5b714	#N/A	Metazoa	1	Annelida	1	Clitellata	1	Enchytraeida	1	Enchytraeidae	1	Fridericia_segmented_worms	1	Fridericia_eiseni	0.99	0	0	0	0	0	0	0	0	0	0	0	0	0	0	0	0	0	0	0	0	0	0	0	0	0	0	0	0	8	0	0	0	0	0
1dd35f4d2b74ca000595a9fd12209ac654a5a838	#N/A	Metazoa	1	Annelida	1	Clitellata	1	Enchytraeida	1	Enchytraeidae	1	Fridericia_segmented_worms	1	Fridericia_paroniana	1	0	0	0	0	0	0	0	0	0	0	0	0	0	0	0	0	0	0	0	0	0	0	0	0	0	0	0	0	1	0	0	0	0	0
e9834d053e6511c0cbde678b2ec6470337d9a18b	#N/A	Metazoa	1	Arthropoda	1	Collembola	1	Poduromorpha	1	Neanuridae	1	Friesea	1	Friesea_claviseta	1	0	0	0	0	0	0	0	0	0	0	0	0	0	0	0	0	0	0	0	0	0	0	0	0	0	0	0	0	1	0	0	0	0	0
3faa134015e206746ca3c5498fd83dd84fc5f2db	#N/A	Metazoa	1	Arthropoda	1	Collembola	1	Symphypleona	1	Katiannidae	1	Gisinianus	1	Gisinianus_flammeolus	1	0	0	0	0	0	0	0	0	0	0	0	0	0	0	0	0	1	0	0	0	0	0	0	0	0	0	0	0	0	0	0	0	0	0
c50adbd91907701b0027e4af10349e252dbddd1e	#N/A	Metazoa	1	Arthropoda	1	Collembola	1	Symphypleona	1	Katiannidae	1	Gisinianus	1	Gisinianus_flammeolus	1	0	0	0	0	0	0	0	0	0	0	0	0	0	0	0	0	1	16	0	0	0	0	0	0	0	0	0	0	0	0	0	0	0	0
1112d2659f5968f35da5d67e88c8bfb7246ade34	#N/A	Metazoa	1	Arthropoda	1	Arachnida	1	Sarcoptiformes	1	Hemileiidae	1	Hemileius	1	Hemileius_initialis	1	0	0	0	0	0	0	0	0	0	0	0	0	0	0	0	0	0	0	0	0	0	0	0	0	0	0	0	0	0	0	0	1	0	0
f55feac803e287d14549c6f021df79b9f672f151	#N/A	Metazoa	1	Annelida	1	Clitellata	1	Enchytraeida	1	Enchytraeidae	1	Henlea	1	Henlea_glandulifera	1	0	0	0	0	0	0	0	0	0	0	0	0	0	0	0	0	1	0	0	0	0	0	0	0	0	0	0	0	0	0	0	0	0	0
f690a0c782f519384eb1221fa104634f73c05c73	#N/A	Metazoa	1	Annelida	1	Clitellata	1	Enchytraeida	1	Enchytraeidae	1	Henlea	1	Henlea_glandulifera	1	0	0	0	0	0	0	0	0	0	0	0	0	0	0	13	0	0	0	0	0	0	0	0	0	0	0	0	0	0	0	0	0	0	0
2ed42af7885a7a06aff2b0fc5d25376feb786f08	#N/A	Metazoa	1	Annelida	1	Clitellata	1	Enchytraeida	1	Enchytraeidae	1	Henlea	1	Henlea_nasuta	1	0	0	0	0	0	0	0	0	0	0	0	0	0	0	0	0	0	0	0	0	0	0	0	0	5	0	0	0	0	0	0	0	0	0
68d417e55ffbaa43a6ace721cced0b63d361bdf3	#N/A	Metazoa	1	Annelida	1	Clitellata	1	Enchytraeida	1	Enchytraeidae	1	Henlea	1	Henlea_perpusilla	1	0	0	2	0	0	0	0	0	0	0	0	0	0	0	0	0	0	0	0	0	0	0	0	0	0	0	0	0	0	0	0	0	0	0
e54d6ff83c06ba279919f9f440ef8e66e312868e	#N/A	Metazoa	1	Annelida	1	Clitellata	1	Enchytraeida	1	Enchytraeidae	1	Henlea	1	Henlea_perpusilla	1	0	0	0	0	0	0	0	0	0	0	0	0	0	0	0	0	0	0	0	1	0	0	0	0	0	0	0	0	0	0	0	73	0	0
f5f91b2f53c36780908c78fb71c0392673681a32	#N/A	Metazoa	1	Annelida	1	Clitellata	1	Enchytraeida	0.99	Enchytraeidae	0.99	Henlea	0.99	Henlea_perpusilla	0.99	0	0	0	0	0	0	0	0	0	0	0	0	0	0	0	0	0	0	0	0	0	0	0	0	0	0	0	0	0	1	0	0	0	0
02e25b398491d4ebcfe602d231434a2a33d8c18b	#N/A	Metazoa	1	Arthropoda	1	Malacostraca	1	Isopoda	1	Trichoniscidae	1	Hyloniscus	1	Hyloniscus_riparius	1	0	0	0	0	0	0	0	0	0	1	0	0	0	0	0	0	0	0	0	0	0	0	0	0	0	0	0	0	0	0	0	0	0	0
43277cc1d9d8f6b47220c83924928ca7f238504c	#N/A	Metazoa	1	Arthropoda	1	Malacostraca	1	Isopoda	1	Trichoniscidae	1	Hyloniscus	1	Hyloniscus_riparius	1	0	1	0	0	0	0	0	0	0	0	0	0	0	0	0	0	0	0	0	0	0	0	0	0	0	0	0	0	0	0	0	0	0	0
d10082878aabd849c9640132310601a472aee7f4	#N/A	Metazoa	1	Arthropoda	1	Malacostraca	1	Isopoda	1	Trichoniscidae	1	Hyloniscus	1	Hyloniscus_riparius	1	0	1	3	4	0	2	35	14	0	17	29	2	1	38	3	4	0	0	0	0	0	0	0	0	0	0	0	0	0	2	5	5	22	1
6a46e6af500ce3557e022da80faac4de9fdcbdcb	#N/A	Metazoa	1	Arthropoda	0.99	Malacostraca	0.94	Isopoda	0.94	Trichoniscidae	0.94	Hyloniscus	0.94	Hyloniscus_sp	0.94	0	0	0	0	0	0	0	0	0	0	0	0	0	0	0	0	0	0	0	0	0	0	0	0	0	0	0	1	0	0	0	0	0	0
fc3645fd5a2a63f95d0605623ffcfc46b5668288	#N/A	Metazoa	0.98	Arthropoda	0.96	Malacostraca	0.89	Isopoda	0.89	Trichoniscidae	0.89	Hyloniscus	0.89	Hyloniscus_sp	0.89	0	0	0	0	0	0	0	0	0	0	0	0	0	0	0	0	0	0	0	0	0	0	0	0	0	0	0	0	0	0	0	0	1	0
88197784b31a2379337d8065bbb31d3bc71550d4	#N/A	Metazoa	1	Tardigrada	0.95	Eutardigrada	0.95	Parachela_tardigrades	0.95	Hypsibiidae	0.91	Hypsibius	0.9	Hypsibius_sp	0.59	0	0	0	0	0	0	1	0	0	0	0	0	0	0	0	0	0	0	0	0	0	0	0	0	0	0	0	0	0	0	0	0	0	0
56246182c94da2e6eefdfd7b1d0362475f15a121	#N/A	Metazoa	1	Arthropoda	1	Insecta	1	Lepidoptera	1	Geometridae	1	Idaea	1	Idaea_biselata	1	0	0	0	0	1	0	0	0	0	0	0	0	0	0	0	0	0	0	0	0	0	0	0	0	0	0	0	0	0	0	0	0	0	0
d70a9a660be8a2121bc9fd33d454fb9606799470	#N/A	Metazoa	1	Arthropoda	1	Collembola	0.98	Entomobryomorpha	0.98	Isotomidae	0.97	Isotoma_springtails	0.97	Isotoma_viridis	0.97	0	0	0	0	0	0	0	0	0	0	0	0	0	0	0	0	0	0	0	0	0	0	0	0	7	83	0	1	2	0	0	0	0	0
0bd9a61cd33472a51caf32309f5772e0f0fd5195	#N/A	Metazoa	1	Arthropoda	1	Collembola	1	Entomobryomorpha	1	Isotomidae	1	Isotomiella	1	Isotomiella_minor	1	0	0	0	0	0	0	0	0	0	0	0	0	0	0	0	0	0	0	0	0	0	0	0	0	0	0	0	0	0	0	0	0	0	0
2bb5f03388d6002af8dc9b04cb9e0da5612b0b35	#N/A	Metazoa	1	Arthropoda	1	Collembola	1	Entomobryomorpha	1	Isotomidae	1	Isotomiella	1	Isotomiella_minor	1	0	0	0	0	0	0	0	0	0	0	0	0	0	0	0	0	0	0	0	0	0	0	0	0	0	0	0	0	0	0	0	0	0	0
f201146f221d09d73b85330594bc20e22ddf6cb2	#N/A	Metazoa	1	Arthropoda	1	Collembola	1	Entomobryomorpha	1	Isotomidae	1	Isotomiella	1	Isotomiella_minor	1	0	0	0	0	0	0	0	0	0	0	1	0	0	1	0	0	25	0	0	9	0	0	1	0	0	0	0	0	0	0	0	0	0	0
5ba40587e74a2112a37d2df4c94e8c2f0836b639	#N/A	Metazoa	1	Arthropoda	1	Collembola	0.95	Entomobryomorpha	0.95	Isotomidae	0.95	Isotomiella	0.95	Isotomiella_minor	0.95	0	0	0	0	0	0	0	0	0	0	0	0	0	0	0	0	0	0	0	0	0	0	0	0	0	0	0	0	0	0	0	0	0	0
ba41941feffc2caa7adced7c751f445088c2d7dd	#N/A	Metazoa	1	Arthropoda	1	Collembola	1	Entomobryomorpha	1	Entomobryidae	1	Lepidocyrtus	1	Lepidocyrtus_cyaneus	1	0	0	0	0	0	0	0	0	0	0	0	0	0	0	0	0	0	0	0	0	0	0	0	14	1	1	1	1	0	0	0	0	0	0
f4734855c12a18fbbcc8ea258b47c524e429e7ed	#N/A	Metazoa	1	Arthropoda	0.99	Collembola	0.94	Entomobryomorpha	0.94	Entomobryidae	0.93	Lepidocyrtus	0.93	Lepidocyrtus_sp	0.93	0	0	0	0	0	0	0	0	0	0	0	0	0	0	0	0	0	0	0	0	0	0	0	0	0	0	0	0	0	0	0	0	0	0
83f44fc931a9ea943a5e564d53317ebc455ead3e	#N/A	Metazoa	1	Arthropoda	0.99	Collembola	0.95	Entomobryomorpha	0.95	Entomobryidae	0.95	Lepidocyrtus	0.92	Lepidocyrtus_sp	0.92	0	0	0	0	0	0	0	0	0	0	0	0	0	0	0	0	0	0	0	0	0	0	0	0	0	0	0	0	0	0	0	0	0	0
13f10b6465efdb0f4b126d76c14b37e48a7b03cd	#N/A	Metazoa	1	Arthropoda	1	Chilopoda	1	Lithobiomorpha	1	Lithobiidae	1	Lithobius	1	Lithobius_curtipes	1	0	0	0	0	0	0	0	0	0	0	0	0	0	0	0	0	149	0	1	0	0	2	0	0	0	0	0	0	0	0	0	0	0	0
973dd76ee66d3ec43aad6de02d684be2a8e76251	#N/A	Metazoa	1	Annelida	1	Clitellata	1	Crassiclitellata	1	Lumbricidae	1	Lumbricus	1	Lumbricus_castaneus	1	0	0	0	0	0	0	0	0	0	0	0	0	0	0	0	0	0	0	0	0	0	0	0	0	1	0	214	0	0	0	0	0	0	0
3ce0ca71832eadaec899354dfd2e65d14783009a	#N/A	Metazoa	1	Annelida	1	Clitellata	1	Crassiclitellata	1	Lumbricidae	1	Lumbricus	1	Lumbricus_terrestris	1	0	0	0	0	0	0	0	0	0	0	0	0	0	0	0	0	0	0	0	0	0	0	0	0	0	0	0	0	0	0	0	0	0	0
7325b9fa1591b1a1896263faca5aae383b9d919c	#N/A	Metazoa	1	Annelida	1	Clitellata	1	Crassiclitellata	1	Lumbricidae	1	Lumbricus	1	Lumbricus_terrestris_L1	1	0	0	0	0	0	0	0	0	0	0	0	0	0	0	0	0	0	0	0	0	0	0	0	0	0	0	0	0	0	0	0	0	0	0
c54d216d0e0caecc98c67551dd8531a1dacb7669	#N/A	Metazoa	1	Annelida	1	Clitellata	1	Crassiclitellata	1	Lumbricidae	1	Lumbricus	1	Lumbricus_terrestris_L1	1	0	0	0	0	0	0	0	0	0	0	0	0	0	0	0	0	0	0	0	0	0	0	0	0	0	0	0	0	0	0	0	0	0	0
89d1dbe544578c1d03d155410cef6d19a9600834	#N/A	Metazoa	1	Tardigrada	1	Eutardigrada	1	Parachela_tardigrades	1	Macrobiotidae	1	Macrobiotus	1	Macrobiotus_scoticus	1	0	0	0	0	0	0	0	0	15	0	0	0	0	0	0	0	0	0	0	0	0	0	0	0	0	0	0	0	0	0	0	0	0	0
0de6a2f3a2d72be8a8f5e1080d09acf717e9080b	#N/A	Metazoa	1	Rotifera	1	Eurotatoria	1	Philodinida	1	Philodinidae	1	Macrotrachela	1	Macrotrachela_quadricornifera	1	0	0	0	0	0	0	0	0	0	0	0	0	0	0	1	0	0	0	0	0	0	0	0	0	0	0	0	0	0	0	0	0	0	0
8c2ea4b4258b3121b9383b50c4151d083d3bba4b	#N/A	Metazoa	1	Rotifera	1	Eurotatoria	1	Philodinida	1	Philodinidae	1	Macrotrachela	1	Macrotrachela_quadricornifera	1	0	0	0	0	0	0	0	1	0	0	0	0	0	0	0	0	0	0	0	0	0	0	0	0	0	0	0	0	0	0	0	0	0	0
8d1be5d49f7f670f95b7ff84266702c62619ced6	#N/A	Metazoa	1	Rotifera	1	Eurotatoria	1	Philodinida	1	Philodinidae	1	Macrotrachela	1	Macrotrachela_quadricornifera	1	0	0	0	0	0	0	0	1	0	0	0	0	0	0	0	0	0	0	0	0	0	0	0	0	0	0	0	0	0	0	0	0	0	0
deb5c2361ad5bede2a1a25b51942382643d4a48e	#N/A	Metazoa	1	Rotifera	1	Eurotatoria	1	Philodinida	1	Philodinidae	1	Macrotrachela	1	Macrotrachela_quadricornifera	1	0	0	0	0	0	0	0	1	0	0	0	0	0	0	0	0	0	0	0	0	0	0	0	0	0	0	0	0	0	0	0	0	0	0
d28b854250bc34eb4da1e39c2ed775c7ea3a9b36	#N/A	Metazoa	1	Rotifera	1	Eurotatoria	1	Philodinida	1	Philodinidae	1	Macrotrachela	1	Macrotrachela_quadricornifera	1	0	0	0	0	0	0	0	2	0	0	0	0	0	0	0	0	0	0	0	0	0	0	0	0	0	0	0	0	0	0	0	0	0	0
0902faf6ba4d2986f4571ebf2aed003db045fac9	#N/A	Metazoa	1	Rotifera	1	Eurotatoria	1	Philodinida	1	Philodinidae	1	Macrotrachela	1	Macrotrachela_quadricornifera	1	0	0	0	1	0	0	0	1	0	0	0	0	0	0	0	0	0	0	0	0	0	0	0	0	0	0	0	0	0	0	0	0	0	0
759b3d90c558ab8c977090954ae23f49d21665b9	#N/A	Metazoa	1	Rotifera	1	Eurotatoria	1	Philodinida	1	Philodinidae	0.99	Macrotrachela	0.97	Macrotrachela_quadricornifera	0.97	0	0	0	0	0	0	0	1	0	0	0	0	0	0	0	0	0	0	0	0	0	0	0	0	0	0	0	0	0	0	0	0	0	0
578a3e06ecb61d0c019a79846922462d41d3aacd	#N/A	Metazoa	1	Rotifera	1	Eurotatoria	1	Philodinida	0.97	Philodinidae	0.97	Macrotrachela	0.96	Macrotrachela_quadricornifera	0.96	0	1	0	0	0	0	0	0	0	0	0	0	0	0	0	0	0	0	0	0	0	0	0	0	0	0	0	0	0	0	0	0	0	0
26a19def051776d59c04c384549b40af5a0699b7	#N/A	Metazoa	1	Rotifera	1	Eurotatoria	1	Philodinida	0.96	Philodinidae	0.96	Macrotrachela	0.96	Macrotrachela_quadricornifera	0.96	52	45	10	0	0	4	0	0	0	0	0	0	0	0	0	0	0	0	0	0	0	0	0	0	0	0	0	0	0	0	0	0	0	0
bc2a272a306e048d46c2d0cf1f485907670d1f89	#N/A	Metazoa	1	Rotifera	1	Eurotatoria	1	Philodinida	0.95	Philodinidae	0.95	Macrotrachela	0.95	Macrotrachela_quadricornifera	0.95	0	0	0	0	0	0	0	0	0	0	0	0	0	0	0	0	0	0	0	0	0	0	0	0	0	0	0	0	0	0	0	0	0	0
2e0df36bdc1a664ad4067ff87b4482a0d15ddd0d	#N/A	Metazoa	1	Rotifera	1	Eurotatoria	1	Philodinida	0.94	Philodinidae	0.94	Macrotrachela	0.94	Macrotrachela_sp	0.94	60	0	1	0	21	13	0	12	0	0	0	0	0	0	0	0	0	0	0	0	0	1	0	0	0	0	0	0	0	0	0	0	0	0
f5de888711e9851fed63c66a48f3025e21a4f19f	#N/A	Metazoa	1	Rotifera	1	Eurotatoria	1	Philodinida	0.92	Philodinidae	0.92	Macrotrachela	0.92	Macrotrachela_sp	0.92	0	0	0	0	0	0	0	0	0	0	0	0	0	0	0	0	0	0	0	0	0	0	0	0	0	0	0	0	0	0	0	0	0	0
a937b0bcad6d1906b3255e1dcfc860330f496a23	#N/A	Metazoa	1	Rotifera	1	Eurotatoria	1	Philodinida	0.86	Philodinidae	0.86	Macrotrachela	0.84	Macrotrachela_sp	0.84	0	0	0	0	0	0	0	0	0	0	0	0	0	1	0	0	0	0	0	0	0	0	0	0	0	0	0	0	0	0	0	0	0	0
89b360271fb4b49a8168215a33041235ec894a63	#N/A	Metazoa	1	Rotifera	1	Eurotatoria	1	Philodinida	0.84	Philodinidae	0.84	Macrotrachela	0.83	Macrotrachela_sp	0.79	0	0	5	0	0	0	0	0	0	0	0	0	0	0	0	0	0	0	0	0	0	0	0	0	0	0	0	0	0	0	0	1	0	0
03677b47564f473f62e1c2c58a62cc1c44795343	#N/A	Metazoa	1	Rotifera	1	Eurotatoria	1	Philodinida	0.87	Philodinidae	0.86	Macrotrachela	0.82	Macrotrachela_sp	0.79	0	0	0	0	0	0	0	0	0	0	0	0	0	0	0	0	0	0	0	0	0	0	1	0	0	0	0	0	0	0	0	0	0	0
cbdac63582ca29703710611dee461cb8706d8db6	#N/A	Metazoa	1	Rotifera	0.98	Eurotatoria	0.98	Philodinida	0.92	Philodinidae	0.88	Macrotrachela	0.82	Macrotrachela_sp	0.52	0	0	0	0	0	0	0	0	0	0	0	0	0	0	0	0	0	0	0	0	0	0	0	0	0	0	0	0	0	0	0	0	0	0
4a41cced4f71ff9a5fe432a17f2caa7fc25732ba	#N/A	Metazoa	1	Arthropoda	1	Insecta	1	Coleoptera	1	Cantharidae	1	Malthodes	1	Malthodes_pumilus	1	0	0	0	0	0	0	0	0	0	0	0	0	0	0	0	0	0	0	0	0	0	0	0	0	0	0	0	0	0	0	0	0	0	0
72a40a969644a3a813396966af75c15ad27f583a	#N/A	Metazoa	1	Annelida	1	Clitellata	1	Enchytraeida	1	Enchytraeidae	1	Marionina	1	Marionina_communis	1	0	0	0	0	0	0	0	0	0	0	0	0	0	1	0	0	0	0	0	0	0	0	0	0	0	0	0	0	0	0	0	0	0	0
f15d1b105b97990ccf890083b22f7788c013214f	#N/A	Metazoa	1	Annelida	1	Clitellata	1	Enchytraeida	1	Enchytraeidae	1	Marionina	1	Marionina_communis	1	1	0	0	0	0	0	0	0	0	0	0	0	0	0	0	0	0	0	0	0	0	0	0	0	0	0	0	0	0	0	0	0	0	0
63b6bea94f08354f6c5584b78d76b1c399d45b59	#N/A	Metazoa	1	Annelida	1	Clitellata	1	Enchytraeida	1	Enchytraeidae	1	Marionina	1	Marionina_communis	1	0	0	0	0	0	0	0	0	0	0	0	0	0	0	0	4	0	0	0	0	0	0	0	0	0	0	0	0	0	0	0	0	0	0
7e4aefc363e7f123431de7346580ec01cade7712	#N/A	Metazoa	1	Annelida	1	Clitellata	1	Enchytraeida	1	Enchytraeidae	1	Marionina	1	Marionina_communis	1	0	0	0	21	0	0	0	1	0	0	0	0	0	0	0	0	0	0	0	0	0	0	0	0	0	0	0	0	0	0	0	2	7	0
d3796c2445fcdd899a5677f5690f1ad5b6538fd9	#N/A	Metazoa	1	Arthropoda	1	Collembola	1	Neelipleona	1	Neelidae	1	Megalothorax	1	Megalothorax_willemi	1	0	0	0	0	0	0	0	0	0	0	0	0	0	0	0	0	0	0	0	0	0	0	0	0	0	0	1	0	0	0	0	0	0	0
3776d28943327355e169c00c568de5d1d672f516	#N/A	Metazoa	1	Arthropoda	1	Insecta	1	Diptera	1	Phoridae	0.98	Megaselia	0.97	Megaselia_sp	0.29	0	0	0	0	0	0	0	0	0	0	0	0	0	0	0	0	0	0	0	0	0	0	0	0	0	0	0	0	0	0	0	0	0	0
5a46ed3eceb07fee587bb969dc4f41a7d934d21c	#N/A	Metazoa	1	Arthropoda	1	Insecta	1	Diptera	0.93	Phoridae	0.84	Megaselia	0.83	Megaselia_sp	0.72	0	0	0	0	0	1	0	0	0	0	0	0	0	0	0	0	0	0	0	0	0	0	0	0	0	0	0	0	0	0	0	0	0	0
64f5e283b62263419a946894e338b222618f5363	#N/A	Metazoa	1	Arthropoda	1	Arachnida	0.96	Sarcoptiformes	0.96	Oribotritiidae	0.96	Mesotritia	0.96	Mesotritia_nuda	0.96	0	0	0	1	0	0	1	0	0	0	0	0	0	0	0	0	0	0	0	0	0	0	0	0	0	0	0	0	0	0	0	0	0	0
3c160ba27b54f9b6130d1553cabefbfd0f3e25e3	#N/A	Metazoa	1	Arthropoda	1	Arachnida	0.8	Sarcoptiformes	0.8	Oribotritiidae	0.8	Mesotritia	0.8	Mesotritia_sp	0.8	0	0	0	0	0	0	0	0	0	0	0	0	0	0	0	0	0	0	0	0	0	0	0	0	0	0	0	0	0	0	0	0	0	0
4411946d45a8b18af32e311cfe70e0e7df61af5e	#N/A	Metazoa	1	Arthropoda	1	Insecta	1	Diptera	1	Limoniidae	1	Metalimnobia	1	Metalimnobia_quadrinotata	0.99	0	0	0	0	0	0	0	16	0	0	0	0	0	0	0	0	0	0	0	0	0	0	0	0	0	0	0	0	0	0	0	0	0	0
7e52da4e614d276b06508e872a8920f0a2b9d4e5	#N/A	Metazoa	1	Arthropoda	1	Insecta	1	Diptera	1	Limoniidae	1	Metalimnobia	0.98	Metalimnobia_sp	0.37	0	0	0	0	0	0	0	1	0	0	0	0	0	0	0	0	0	0	0	0	0	0	0	0	0	0	0	0	0	0	0	0	0	0
7d68f3789c57f1f86ad618fc811321ed1e3e2068	#N/A	Metazoa	1	Arthropoda	1	Collembola	1	Poduromorpha	1	Onychiuridae	1	Micraphorura	1	Micraphorura_absoloni	1	0	0	0	0	0	0	0	0	0	0	0	1	0	0	0	0	0	0	0	0	0	0	0	0	0	0	0	0	0	0	0	0	0	0
da891da748c09e8eebee48b4aeb15950654ec32c	#N/A	Metazoa	1	Rotifera	1	Eurotatoria	1	Philodinida	1	Philodinidae	1	Mniobia	1	Mniobia_russeola	1	0	0	0	0	0	0	0	0	0	0	0	0	0	0	0	0	0	0	0	0	3	0	0	0	0	0	0	0	0	0	0	0	0	0
0f0047eeb5fda3b51be090f70960dbce06ccc96b	#N/A	Metazoa	1	Arthropoda	1	Insecta	1	Hymenoptera	1	Formicidae	1	Myrmica	1	Myrmica_rubra	1	0	0	0	0	0	0	0	5	0	0	0	0	0	0	0	0	0	0	0	0	0	0	0	0	0	0	0	0	0	0	0	0	0	0
2464f65aaf88371fe63acf67290ff90618876bb3	#N/A	Metazoa	1	Arthropoda	1	Arachnida	1	Sarcoptiformes	1	Nanorchestidae	1	Nanorchestes	1	Nanorchestes_sp._BOLD:AAW0387	1	0	0	0	0	0	0	0	0	0	0	0	0	0	0	0	0	0	0	0	0	0	0	0	0	0	0	0	0	0	0	0	1	0	0
a4d2cbb378a143d02f16b62b4474193970b31c96	#N/A	Metazoa	1	Arthropoda	1	Arachnida	1	Opiliones	1	Nemastomatidae	1	Nemastoma_daddy_longlegs	1	Nemastoma_lugubre	1	0	0	0	0	0	0	0	0	0	0	0	0	0	0	0	0	0	0	0	0	0	0	0	0	0	0	0	0	0	0	0	0	0	1
512fa43372ccbf20006419aaaab56fc86a599c87	#N/A	Metazoa	1	Mollusca	1	Gastropoda	1	Stylommatophora	1	Oxychilidae	1	Nesovitrea	1	Nesovitrea_sp._BOLD:ABV9664	1	0	0	0	0	0	0	0	0	0	1	0	1	0	0	0	0	0	0	0	0	0	0	0	0	0	0	0	0	0	0	0	1	15	0
77d9e935250fb21820d101153d30c75a7f528021	#N/A	Metazoa	1	Arthropoda	1	Insecta	1	Diptera	1	Cecidomyiidae	1	Neurolyga	1	Neurolyga_excavata	1	0	0	0	0	0	0	0	0	0	0	6	0	0	0	0	0	0	0	0	0	0	0	0	0	0	0	0	0	0	0	0	0	0	0
da27167cc8a4a6434cc5928689c9365a15eec355	#N/A	Metazoa	1	Arthropoda	1	Arachnida	1	Sarcoptiformes	1	Nothridae	1	Nothrus	1	Nothrus_sp	0.55	0	0	0	0	0	0	0	0	0	0	0	0	0	0	0	0	0	0	0	0	0	0	0	0	0	0	0	0	0	0	0	0	0	0
86861bbba2f8aea592def9a8707d9dcf6fb563ff	#N/A	Metazoa	1	Arthropoda	1	Arachnida	1	Sarcoptiformes	1	Nothridae	0.99	Nothrus	0.99	Nothrus_sp	0.73	0	0	0	0	0	0	0	0	0	0	0	0	0	0	0	0	0	0	0	0	0	0	0	0	0	0	0	0	0	0	0	0	0	0
206b979778b7877a1be724aebfd13fdb2f5c9d58	#N/A	Metazoa	1	Arthropoda	1	Insecta	1	Coleoptera	1	Carabidae	1	Notiophilus	1	Notiophilus_palustris	1	0	0	0	0	0	0	0	0	0	0	0	0	0	0	0	0	0	0	0	0	0	0	0	0	0	0	0	0	0	0	0	0	0	0
de419f4ba7b74c0e8420ff576ec193690763b2d2	#N/A	Metazoa	1	Arthropoda	1	Insecta	1	Coleoptera	1	Carabidae	1	Notiophilus	1	Notiophilus_palustris	1	0	0	0	0	0	0	0	0	0	0	0	0	0	0	0	0	0	0	0	0	0	0	0	0	0	0	0	0	0	0	0	0	0	0
6fd01630abc96255235dbc0f830c5d42dd5ebcda	#N/A	Metazoa	1	Arthropoda	1	Insecta	1	Lepidoptera	1	Geometridae	1	Operophtera	1	Operophtera_sp	0.71	0	0	0	0	0	0	2	0	0	0	0	0	0	0	0	0	0	0	0	0	0	0	0	0	0	0	0	0	0	0	0	0	0	0
2c7c18a27f496dceb49ed8195feb6fc397074388	#N/A	Metazoa	1	Arthropoda	1	Arachnida	1	Sarcoptiformes	1	Oppiidae	1	Oppiella	1	Oppiella_nova	1	0	0	0	0	0	0	0	0	0	0	0	0	0	0	0	0	0	0	0	0	0	2	0	0	0	0	0	0	0	0	0	0	0	0
93f3689d798f52c870845cec660b8a93059a646b	#N/A	Metazoa	1	Arthropoda	1	Collembola	1	Entomobryomorpha	1	Orchesellidae	1	Orchesella	1	Orchesella_flavescens	1	0	0	0	1	0	0	0	0	0	0	0	0	0	0	0	0	0	0	0	0	0	0	0	0	0	0	0	0	0	0	0	0	0	0
c1f445eefd102db9440979b61a0b340aa6bd532d	#N/A	Metazoa	1	Arthropoda	1	Collembola	1	Entomobryomorpha	1	Orchesellidae	1	Orchesella	1	Orchesella_flavescens	1	0	0	0	0	0	0	0	0	0	0	0	0	0	0	0	0	0	0	0	4	2	0	0	0	0	0	0	0	0	0	0	0	0	0
b836a16b96c2935cafb7b39a8eb22aa5aee8b824	#N/A	Metazoa	1	Arthropoda	1	Collembola	1	Entomobryomorpha	1	Orchesellidae	1	Orchesella	1	Orchesella_flavescens	1	0	0	0	1	0	0	1	0	0	0	3	1	2	0	0	0	0	0	0	10	0	0	0	0	0	0	0	0	0	1	0	0	0	0
cd3393db1f24f4595d3bee5e8674787cb76cfd9b	#N/A	Metazoa	1	Arthropoda	1	Insecta	1	Diptera	0.97	Keroplatidae	0.86	Orfelia	0.83	Orfelia_sp	0.83	0	0	1	0	0	0	0	0	0	0	0	0	0	0	0	0	0	0	0	0	0	0	0	0	0	0	0	0	0	0	0	0	0	0
6f8e0321c558bc248b9745b97f23180d24ef8b25	#N/A	Metazoa	1	Nematoda	1	Chromadorea	1	Rhabditida	0.98	Rhabditidae	0.97	Oscheius	0.97	Oscheius_tipulae	0.96	0	0	0	0	0	0	0	0	0	0	0	0	0	0	0	0	0	0	0	0	0	0	0	0	0	0	0	1	0	0	0	0	0	0
4c896d4d900d66163763c1b7a2e337cb28fb019d	#N/A	Metazoa	1	Arthropoda	1	Arachnida	1	Araneae	1	Thomisidae	1	Ozyptila	1	Ozyptila_trux	1	0	0	0	0	0	0	0	0	0	0	0	0	0	0	0	0	0	0	0	0	0	0	0	0	0	0	0	0	0	0	0	0	0	0
7a45ced137f2627bbf41b2aec4be014135c2db14	#N/A	Metazoa	1	Tardigrada	1	Eutardigrada	1	Parachela_tardigrades	1	Macrobiotidae	1	Paramacrobiotus	1	Paramacrobiotus_fairbanksi	0.98	0	0	0	0	0	1	0	0	0	0	0	0	0	0	0	0	0	0	0	0	0	0	0	0	0	0	0	0	0	0	0	0	0	0
58b2fa24fc9e92c831bebd3b5b63e0019f651824	#N/A	Metazoa	1	Arthropoda	1	Collembola	1	Entomobryomorpha	1	Isotomidae	1	Parisotoma	1	Parisotoma_notabilis	1	0	0	0	0	0	0	0	0	0	0	0	0	0	0	0	0	0	0	0	0	0	0	0	0	0	0	0	0	0	0	0	0	0	0
64679e6e2282949f5719313bd90bed1491eb8e6c	#N/A	Metazoa	1	Arthropoda	1	Collembola	1	Entomobryomorpha	1	Isotomidae	1	Parisotoma	1	Parisotoma_notabilis	1	0	0	0	0	0	0	0	0	0	0	0	0	0	0	0	0	0	0	0	0	0	0	0	0	0	0	0	0	0	0	0	0	0	0
e160f23f122dd50ce1fca93b4149a05692cd3fe4	#N/A	Metazoa	1	Arthropoda	1	Collembola	1	Entomobryomorpha	1	Isotomidae	1	Parisotoma	1	Parisotoma_notabilis	1	0	0	0	0	0	0	0	0	0	0	0	0	0	0	0	0	1	0	0	0	0	0	0	0	0	0	0	0	0	0	0	0	0	0
479e52c4c9ff947dff93d53f64aef5e799747bcd	#N/A	Metazoa	1	Arthropoda	1	Collembola	1	Entomobryomorpha	1	Isotomidae	1	Parisotoma	1	Parisotoma_notabilis	1	0	0	0	0	0	0	0	0	0	0	0	0	0	0	0	0	0	0	0	0	0	0	0	0	0	0	0	0	0	0	0	0	0	0
14f9a19a35d436ab9e13929c6015c6f80edaec5e	#N/A	Metazoa	1	Arthropoda	1	Collembola	1	Entomobryomorpha	1	Isotomidae	1	Parisotoma	1	Parisotoma_notabilis	1	1	0	0	0	0	0	0	0	0	0	0	0	0	0	0	0	1	0	0	0	0	0	0	0	0	0	0	0	0	1	0	0	0	0
d031df5431023bdc99bf7b8fe689f7615aa7e3c6	#N/A	Metazoa	1	Arthropoda	1	Collembola	1	Entomobryomorpha	1	Isotomidae	1	Parisotoma	1	Parisotoma_notabilis	1	0	0	0	0	0	0	0	0	0	0	0	0	0	0	0	0	0	0	0	0	0	0	0	0	0	0	0	0	0	0	0	0	0	0
c110754535e70d9dec71d049555f8bf8569ffc39	#N/A	Metazoa	1	Arthropoda	1	Collembola	1	Entomobryomorpha	1	Isotomidae	1	Parisotoma	1	Parisotoma_notabilis	1	0	0	0	0	0	0	0	0	0	0	0	0	0	0	0	0	0	0	0	0	0	0	0	0	0	0	0	0	0	0	0	0	0	0
fb5763114b3a99bb0503b98509336fd0505f456b	#N/A	Metazoa	1	Arthropoda	1	Collembola	0.99	Entomobryomorpha	0.99	Isotomidae	0.99	Parisotoma	0.99	Parisotoma_notabilis	0.98	0	0	0	0	0	0	0	0	0	0	0	0	0	0	0	0	0	0	3	0	0	0	0	0	0	0	0	0	0	0	0	0	0	0
a11575afa46b4936d8f4fca4371953f072679ac0	#N/A	Metazoa	1	Arthropoda	1	Collembola	0.98	Entomobryomorpha	0.98	Isotomidae	0.97	Parisotoma	0.97	Parisotoma_notabilis	0.97	0	0	0	0	0	0	0	0	0	0	0	0	0	0	0	0	0	0	0	0	0	0	0	0	0	0	0	0	0	0	0	0	0	0
8ac56e8caeefe6fbfdf1367d3c4528a73f307727	#N/A	Metazoa	1	Arthropoda	1	Arachnida	1	Sarcoptiformes	1	Phthiracaridae	1	Phthiracarus	1	Phthiracarus_borealis	0.98	0	0	0	0	0	0	0	0	0	0	0	0	0	0	0	0	0	0	0	0	0	0	0	0	0	0	0	0	0	0	0	0	0	0
6671dcbbccb5130574ce9e4287d677c7f89c035f	#N/A	Metazoa	1	Arthropoda	1	Insecta	1	Coleoptera	1	Curculionidae	1	Phyllobius	1	Phyllobius_argentatus	1	0	3	0	0	0	0	0	0	0	0	0	0	0	0	0	0	0	0	0	0	0	0	0	0	0	0	0	0	0	0	0	0	0	0
d60a6faae4654bb7e15a2fa60665b055885aaf31	#N/A	Metazoa	1	Arthropoda	1	Arachnida	1	Araneae	1	Lycosidae	1	Piratula	1	Piratula_hygrophila	1	0	0	0	0	0	0	0	0	0	0	0	0	0	0	0	0	0	0	0	0	0	0	0	0	0	0	0	0	0	0	0	0	0	2
28ceb4dee348eec0493a05ef23f35c472429e7e8	#N/A	Metazoa	0.97	Nematoda	0.91	Chromadorea	0.91	Plectida	0.87	Plectidae	0.87	Plectus	0.87	Plectus_sp	0.87	1	0	0	0	0	0	0	0	0	0	0	0	0	0	0	0	0	0	0	0	0	0	0	0	0	0	0	0	0	0	1	0	1	0
5f926175490ae14824e89d747580d913f2ccaae3	#N/A	Metazoa	1	Arthropoda	1	Collembola	1	Entomobryomorpha	1	Tomoceridae	1	Pogonognathellus	1	Pogonognathellus_flavescens	0.96	2	0	0	0	0	3	0	0	2	0	0	0	0	6	0	1	1	0	0	0	0	0	0	1	0	0	0	0	0	0	0	0	0	0
b2f2b128fd9c0482c30f7e3438b737796c3a3da8	#N/A	Metazoa	1	Arthropoda	1	Collembola	1	Entomobryomorpha	1	Tomoceridae	1	Pogonognathellus	1	Pogonognathellus_longicornis	1	0	0	0	0	0	0	0	0	0	0	0	0	0	0	0	0	0	0	0	0	0	0	0	0	0	1	0	0	0	0	0	0	0	0
4be1138bb3c93cf0d889c95f24adb488b011cf3c	#N/A	Metazoa	1	Arthropoda	1	Collembola	1	Entomobryomorpha	1	Tomoceridae	1	Pogonognathellus	1	Pogonognathellus_longicornis	0.99	0	0	0	0	0	0	0	0	3	0	0	0	1	0	0	0	0	0	0	0	0	0	0	0	0	0	0	0	0	0	0	0	0	0
2ec2677e8a1ab84556407361a9da4a479aac0f06	#N/A	Metazoa	1	Arthropoda	1	Collembola	1	Entomobryomorpha	1	Tomoceridae	1	Pogonognathellus	1	Pogonognathellus_longicornis	0.97	0	0	0	0	0	0	0	0	1	0	0	0	0	0	0	0	0	0	0	0	0	0	0	0	0	0	0	0	0	0	0	0	0	0
55f7e41eb9f6cf44fe7e878d1d8585bbceda0d39	#N/A	Metazoa	1	Arthropoda	1	Collembola	1	Entomobryomorpha	1	Tomoceridae	1	Pogonognathellus	1	Pogonognathellus_sp	0.64	0	0	0	0	0	0	0	0	0	0	0	0	0	0	0	0	0	0	0	0	0	0	0	0	0	0	0	0	0	0	0	0	0	0
b3e15f279eef9b5e28f26baef544d7a66478cd60	#N/A	Metazoa	1	Arthropoda	1	Collembola	0.98	Entomobryomorpha	0.98	Tomoceridae	0.98	Pogonognathellus	0.98	Pogonognathellus_sp	0.72	0	0	0	0	0	0	0	0	0	0	0	0	0	0	0	0	0	0	0	0	0	0	0	0	1	0	0	0	0	0	0	0	0	0
fe159a728f50068caae6f8c985e6d8dc65eeb8e6	#N/A	Metazoa	1	Arthropoda	1	Collembola	0.95	Entomobryomorpha	0.95	Tomoceridae	0.92	Pogonognathellus	0.92	Pogonognathellus_sp	0.92	3	0	0	0	0	0	0	0	0	0	0	0	0	0	0	0	34	1	0	0	0	1	0	0	0	0	0	0	0	8	0	0	0	0
e478c76bc6175ba6e6328a5a46b3d38e15ad5998	#N/A	Metazoa	1	Arthropoda	1	Collembola	1	Entomobryomorpha	0.88	Tomoceridae	0.88	Pogonognathellus	0.88	Pogonognathellus_sp	0.74	0	0	0	0	0	0	0	0	0	0	0	0	1	0	0	0	0	0	0	0	0	0	0	0	0	0	0	0	0	0	0	0	0	0
b7ebbcdc41b2630696f031116292f4ba1c2c9430	#N/A	Metazoa	0.99	Arthropoda	0.94	Collembola	0.86	Entomobryomorpha	0.86	Tomoceridae	0.86	Pogonognathellus	0.86	Pogonognathellus_sp	0.86	0	0	0	0	0	0	0	0	0	0	0	0	0	0	0	0	0	0	0	0	0	0	0	0	0	0	0	0	0	0	0	0	0	0
4c8dc4a0fd1d41a88407fb46ca9cd47c25578e55	#N/A	Metazoa	1	Arthropoda	1	Diplopoda	1	Polydesmida	1	Polydesmidae	1	Polydesmus	1	Polydesmus_denticulatus	1	0	0	0	0	0	0	0	0	0	0	0	0	0	0	0	0	0	0	0	0	0	0	0	0	0	0	0	0	0	0	0	0	0	0
cc6f9aa6fa3a1c226eaecec88e9c9f1e7dd7322d	#N/A	Metazoa	1	Arthropoda	1	Arachnida	1	Sarcoptiformes	1	Damaeidae	1	Porobelba	1	Porobelba_spinosa	1	0	0	0	0	0	0	0	0	0	0	0	0	0	0	0	0	0	0	0	0	0	0	0	0	0	0	0	0	0	0	0	0	0	0
b37035ee994d859047e65b6a811932cd71468764	#N/A	Metazoa	1	Nematoda	1	Chromadorea	1	Rhabditida	1	Neodiplogasteridae	1	Pristionchus	1	Pristionchus_entomophagus	1	1	0	0	0	0	0	0	0	0	0	0	0	0	2	0	0	0	0	1	0	0	0	0	0	0	0	0	0	0	0	0	0	0	0
5d9cedaa001014b40f91f6d47de9410912ab2c5f	#N/A	Metazoa	1	Arthropoda	1	Collembola	1	Poduromorpha	1	Onychiuridae	1	Protaphorura	1	Protaphorura_armata	1	0	0	0	0	0	0	0	0	0	0	0	0	0	1	0	0	0	0	0	0	0	0	0	0	0	0	0	0	0	0	0	0	0	0
66b49af447a23b4de312c7ba3e7c9152817fca1d	#N/A	Metazoa	1	Arthropoda	1	Collembola	1	Poduromorpha	1	Onychiuridae	1	Protaphorura	1	Protaphorura_armata	1	0	0	0	0	0	0	0	0	0	0	0	0	0	1	0	0	0	0	0	0	0	0	0	0	0	0	0	0	0	0	0	0	0	0
d1ce154d9bdcc1aaee2d2764b62a34fb0ba11367	#N/A	Metazoa	1	Arthropoda	1	Collembola	1	Poduromorpha	1	Onychiuridae	1	Protaphorura	1	Protaphorura_armata	1	0	0	0	0	0	0	0	0	0	0	0	0	0	1	0	0	0	0	0	0	0	0	0	0	0	0	0	0	0	0	0	0	0	0
f95a41ec4280b2d25a5d86dc540c052969538a85	#N/A	Metazoa	1	Arthropoda	1	Collembola	1	Poduromorpha	1	Onychiuridae	1	Protaphorura	1	Protaphorura_armata	1	0	0	0	0	0	0	0	0	0	0	0	0	0	48	0	0	0	0	0	0	0	0	0	0	0	0	0	0	0	0	0	0	0	0
e09e8068873f6848f5393b3aaedb5d234816c5d0	#N/A	Metazoa	1	Arthropoda	1	Insecta	1	Coleoptera	1	Silphidae	1	Ptomascopus	1	Ptomascopus_morio	1	0	0	0	1	0	0	0	0	0	0	0	0	0	0	0	0	0	0	0	0	0	0	0	0	0	0	0	0	0	0	0	0	0	0
f371606d6496a0e3f130de8e4ebd40a235f74b59	#N/A	Metazoa	1	Mollusca	1	Gastropoda	1	Stylommatophora	1	Punctidae	1	Punctum	1	Punctum_pygmaeum	0.98	0	0	0	0	0	0	0	0	0	0	0	0	0	0	0	0	0	0	0	0	0	0	0	0	0	0	0	0	0	0	0	0	1	0
6a7c6b3611e485afdf973c3bd90252dc368d0158	#N/A	Metazoa	1	Arthropoda	1	Arachnida	1	Sarcoptiformes	1	Quadroppiidae	1	Quadroppia	1	Quadroppia_sp	0.88	0	0	0	0	0	0	0	0	0	0	0	0	0	0	0	0	2	0	0	0	0	0	0	0	0	0	0	0	0	0	0	0	0	0
0fa5b3bb573ffc567eac417702cee3a2eb225ac3	#N/A	Metazoa	1	Rotifera	1	Eurotatoria	1	undef_Eurotatoria	1	undef_undef_Eurotatoria	1	Rotaria	1	Rotaria_sordida	0.95	0	0	0	0	0	0	0	3	0	0	0	0	0	0	0	0	0	0	0	0	0	0	0	0	0	0	0	0	0	0	0	0	0	0
9ab36ea73013e64cf6121ad385ea5b325e3e9dca	#N/A	Metazoa	1	Rotifera	0.99	Eurotatoria	0.99	undef_Eurotatoria	0.96	undef_undef_Eurotatoria	0.96	Rotaria	0.96	Rotaria_sp	0.88	0	0	0	0	0	0	0	0	0	1	0	0	0	0	0	0	0	0	0	0	0	0	0	0	0	0	0	0	0	0	0	0	0	0
3a8f358ab59a49bbcff4bd4b760c4c1e7a84bfdb	#N/A	Metazoa	1	Rotifera	1	Eurotatoria	1	undef_Eurotatoria	0.96	undef_undef_Eurotatoria	0.96	Rotaria	0.96	Rotaria_sp	0.51	0	0	0	0	0	0	0	0	0	2	0	0	0	0	0	0	0	0	0	0	0	0	0	0	0	0	0	0	0	0	0	0	0	0
cfc77242cf2d5a10504acc5510862e3d37863b98	#N/A	Metazoa	1	Rotifera	1	Eurotatoria	1	undef_Eurotatoria	0.95	undef_undef_Eurotatoria	0.95	Rotaria	0.95	Rotaria_sp	0.91	1	0	0	0	0	0	2	0	0	0	0	0	0	0	0	1	0	0	0	0	0	0	0	0	0	0	0	0	0	0	0	0	0	0
299076af4873c38446165867edbf227f063dd2e9	#N/A	Metazoa	1	Rotifera	0.99	Eurotatoria	0.99	undef_Eurotatoria	0.93	undef_undef_Eurotatoria	0.93	Rotaria	0.93	Rotaria_sp	0.92	0	0	0	0	1	0	0	0	0	0	0	0	0	0	0	0	0	0	0	0	0	0	0	0	0	0	0	0	0	0	0	0	0	8
a7b433306c4eca15596103abf89c72afdb448fd0	#N/A	Metazoa	1	Rotifera	0.98	Eurotatoria	0.98	undef_Eurotatoria	0.93	undef_undef_Eurotatoria	0.93	Rotaria	0.93	Rotaria_sp	0.85	0	1	0	0	0	0	0	0	0	0	0	0	0	0	0	0	0	0	0	0	0	0	0	0	0	0	0	0	0	0	0	0	0	0
5d9c69bee2d0901d0e485521cc53f039b4f1e174	#N/A	Metazoa	1	Rotifera	1	Eurotatoria	1	undef_Eurotatoria	0.89	undef_undef_Eurotatoria	0.89	Rotaria	0.89	Rotaria_sp	0.89	0	0	0	0	0	0	0	0	0	0	0	0	0	0	0	0	0	0	0	1	0	0	0	0	0	0	0	0	0	0	0	0	0	0
653fd2fab25e0996defd5175215d93db7e2eb245	#N/A	Metazoa	1	Rotifera	0.98	Eurotatoria	0.98	undef_Eurotatoria	0.89	undef_undef_Eurotatoria	0.89	Rotaria	0.89	Rotaria_sp	0.87	0	0	0	0	0	0	0	0	0	0	0	0	0	0	0	0	0	0	0	0	0	0	0	0	0	0	0	0	0	0	1	0	0	0
039ecfc1d715f20e7e8f0975a5350c4d200281f8	#N/A	Metazoa	1	Rotifera	1	Eurotatoria	1	undef_Eurotatoria	0.85	undef_undef_Eurotatoria	0.85	Rotaria	0.85	Rotaria_sp	0.85	0	0	0	0	0	0	0	0	0	0	0	0	0	0	0	0	0	0	0	0	0	0	0	0	0	0	0	0	0	0	0	0	0	0
172cafb7e9d6db98686a8a295f80ca8d8f514f89	#N/A	Metazoa	1	Rotifera	1	Eurotatoria	1	undef_Eurotatoria	0.85	undef_undef_Eurotatoria	0.85	Rotaria	0.85	Rotaria_sp	0.8	0	0	0	0	0	0	0	0	0	0	0	0	1	0	0	0	0	0	0	0	0	0	0	0	0	0	0	0	0	0	0	0	0	0
5162b82e1d01fac4ebf349165d3edaea49db700d	#N/A	Metazoa	1	Rotifera	1	Eurotatoria	1	undef_Eurotatoria	0.84	undef_undef_Eurotatoria	0.84	Rotaria	0.84	Rotaria_sp	0.84	0	0	0	0	0	0	0	0	0	0	0	0	0	0	0	0	0	0	0	0	0	0	0	0	0	0	0	0	0	0	0	0	0	0
5750d1beead944c5fcea75b64d3fc329e07acbde	#N/A	Metazoa	1	Rotifera	1	Eurotatoria	1	undef_Eurotatoria	0.84	undef_undef_Eurotatoria	0.84	Rotaria	0.84	Rotaria_sp	0.78	0	0	0	0	0	0	0	0	0	0	0	0	0	0	0	0	0	0	0	0	0	0	0	0	0	0	0	0	0	0	1	0	0	0
63eb68016be940cb3eccabdf6e5f2a54766c80c5	#N/A	Metazoa	1	Rotifera	1	Eurotatoria	1	undef_Eurotatoria	0.83	undef_undef_Eurotatoria	0.83	Rotaria	0.83	Rotaria_sp	0.81	0	0	0	0	0	0	0	0	0	0	0	0	0	0	0	0	0	0	0	0	0	0	0	0	0	0	0	0	0	0	0	0	0	0
617df508666c7b60bc7845aaa47185b853574f33	#N/A	Metazoa	1	Rotifera	1	Eurotatoria	1	undef_Eurotatoria	0.83	undef_undef_Eurotatoria	0.83	Rotaria	0.83	Rotaria_sp	0.8	0	0	0	0	0	0	0	0	0	0	0	10	0	4	0	0	0	3	1	1	0	0	0	0	0	0	0	0	0	0	0	0	0	0
20752085f1bc7b969af67b50f073141e047f6337	#N/A	Metazoa	1	Rotifera	1	Eurotatoria	1	undef_Eurotatoria	0.8	undef_undef_Eurotatoria	0.8	Rotaria	0.8	Rotaria_sp	0.78	0	0	0	0	0	0	0	0	0	0	0	1	0	0	0	0	0	0	0	0	0	0	0	0	0	0	0	0	0	0	0	0	0	0
822385908375b5638b8b325ab29b99ee5313cb51	#N/A	Metazoa	1	Rotifera	1	Eurotatoria	1	undef_Eurotatoria	0.8	undef_undef_Eurotatoria	0.8	Rotaria	0.8	Rotaria_sp	0.78	0	0	0	0	0	0	0	0	0	0	0	0	0	0	0	0	3	0	0	0	0	0	0	0	0	0	0	0	0	0	0	0	0	0
59d5c09c034d46b21f55da67adf4433d44760ab4	#N/A	Metazoa	1	Rotifera	1	Eurotatoria	1	undef_Eurotatoria	0.8	undef_undef_Eurotatoria	0.8	Rotaria	0.8	Rotaria_sp	0.74	0	0	0	0	0	0	0	0	0	0	0	0	0	0	1	0	0	0	0	0	0	0	0	0	0	0	0	0	0	0	0	0	0	0
36e954914364a2fb89ad17584aab1169c97f5a09	#N/A	Metazoa	1	Arthropoda	1	Arachnida	0.99	Sarcoptiformes	0.97	Scheloribatidae	0.97	Scheloribates	0.97	Scheloribates_initialis	0.97	0	0	0	0	0	0	0	0	0	0	0	0	0	0	0	0	0	0	0	0	0	0	0	0	0	0	0	0	0	0	0	1	0	0
1b353daf15b30db4b814ec35bb6ba4364fb83ed1	#N/A	Metazoa	1	Arthropoda	1	Insecta	1	Coleoptera	1	Curculionidae	1	Sciaphilus	1	Sciaphilus_asperatus	1	0	0	0	0	0	0	0	0	0	0	0	0	0	0	0	0	0	0	0	0	0	0	0	0	0	0	0	0	0	0	0	0	0	0
f0ab2f8a0b6f0a3cd7b1a570a3860c8cb1ab375f	#N/A	Metazoa	1	Arthropoda	1	Insecta	1	Hemiptera	1	Rhyparochromidae	1	Scolopostethus	1	Scolopostethus_thomsoni	1	0	0	0	0	0	0	0	0	0	0	0	0	0	0	0	0	0	0	0	0	0	0	0	0	0	0	0	0	0	0	0	1	0	0
2d0e82de47c3db79161d12ecfc7dfe3dfd3038c5	#N/A	Metazoa	1	Arthropoda	1	Collembola	0.94	Symphypleona	0.94	Katiannidae	0.94	Sminthurinus	0.94	Sminthurinus_sp	0.93	9	9	101	354	14	294	349	198	4	0	102	12	0	0	7	0	0	0	8	0	0	0	0	0	47	0	4	14	5	3	10	36	0	0
f7d8f941f8f6fd8e9a562962794426c82b1a37b4	#N/A	Metazoa	1	Arthropoda	1	Insecta	1	Diptera	1	Chironomidae	1	Smittia	1	Smittia_stercoraria	1	0	0	0	0	0	0	0	0	0	0	0	0	0	0	0	0	0	0	0	0	0	0	0	6	0	0	0	0	0	0	0	0	0	0
3cb799648e6f0a6eef7ae6455bf8d16b857c20d3	#N/A	Metazoa	1	Arthropoda	1	Collembola	1	Symphypleona	1	Sminthuridae	1	Sphaeridia	1	Sphaeridia_pumilis	1	0	0	0	0	0	0	0	0	0	0	0	0	0	0	0	0	0	0	0	0	0	0	0	0	0	0	0	0	1	0	0	0	0	0
6317c8758e729ca7552800ec109d675be9833e0e	#N/A	Metazoa	1	Arthropoda	1	Collembola	1	Symphypleona	1	Sminthuridae	1	Sphaeridia	1	Sphaeridia_pumilis	1	0	0	0	0	0	0	0	0	0	0	0	0	0	0	0	0	0	0	0	0	0	0	0	0	0	0	0	29	16	0	0	0	0	0
d52dac72bd2de7f58b7e095fbca96b9c9cc8c38d	#N/A	Metazoa	1	Arthropoda	1	Insecta	1	Lepidoptera	1	Noctuidae	1	Spodoptera	1	Spodoptera_littoralis	1	0	0	0	0	0	0	0	0	0	0	0	0	0	0	0	0	0	0	0	0	0	0	0	0	0	0	0	0	0	0	0	0	0	0
9f0df5785305d566d6ae1123c29f4a992292a889	#N/A	Metazoa	0.94	Arthropoda	0.9	Arachnida	0.89	Sarcoptiformes	0.85	Steganacaridae	0.83	Steganacarus	0.83	Steganacarus_sp	0.83	0	0	0	0	0	0	0	0	0	0	0	0	0	0	0	0	0	0	0	0	0	0	0	0	0	0	0	0	0	0	0	0	0	0
7f12a5c3ab938aa1c74feb1bd56ab542dc50ff02	#N/A	Metazoa	1	Arthropoda	1	Insecta	1	Coleoptera	1	Staphylinidae	1	Stenus	1	Stenus_sp	0.76	0	0	0	0	0	0	0	0	0	0	0	0	0	0	0	0	0	0	0	0	2	0	0	0	0	0	0	0	0	0	0	0	0	0
9dd0b0c73282cffb104e1be19113ca88821f1630	#N/A	Metazoa	0.99	Arthropoda	0.95	Arachnida	0.86	Sarcoptiformes	0.86	Suctobelbidae	0.85	Suctobelbella	0.84	Suctobelbella_sp	0.82	0	0	0	0	0	1	0	0	0	0	0	0	0	0	0	0	0	0	0	0	0	0	0	0	0	0	0	0	0	0	0	0	0	0
250598febc8b76675a3c62b5e1ca457f704bed26	#N/A	Metazoa	1	Arthropoda	1	Arachnida	1	Sarcoptiformes	1	Suctobelbidae	1	Suctobelbella	1	Suctobelbella_subcornigera	1	0	0	1	0	0	0	0	0	0	0	0	0	0	0	0	0	0	0	0	0	0	0	0	0	0	0	0	0	0	0	0	0	0	0
0a034cd91a2fc7c22c11614c2705a076371bb619	#N/A	Metazoa	1	Arthropoda	1	Arachnida	1	Sarcoptiformes	1	Suctobelbidae	1	Suctobelbella	1	Suctobelbella_subcornigera	1	0	0	0	0	0	0	0	0	0	0	0	0	0	0	0	0	0	0	0	0	0	0	1	1	0	0	0	0	0	0	0	0	0	0
61d403d40628de8b2e74a74accef3ded39c73b01	#N/A	Metazoa	1	Arthropoda	1	Arachnida	1	Sarcoptiformes	1	Suctobelbidae	1	Suctobelbella	1	Suctobelbella_subcornigera	0.99	0	0	0	0	0	0	0	0	0	0	0	0	0	0	0	0	0	0	0	0	0	0	0	0	0	0	0	0	0	0	0	0	0	0
47efd76292ed8f583ddfd4279e363fbb846a5a47	#N/A	Metazoa	1	Arthropoda	1	Arachnida	0.99	Sarcoptiformes	0.99	Suctobelbidae	0.99	Suctobelbella	0.99	Suctobelbella_subcornigera	0.95	0	0	0	0	0	0	0	0	0	0	0	0	0	0	0	0	0	0	0	0	1	0	0	0	0	0	0	0	0	0	0	0	0	0
2f289d297c0324b8f3b8e4a60a56cb1426f47161	#N/A	Metazoa	1	Arthropoda	1	Insecta	1	Coleoptera	1	Staphylinidae	1	Tachinus	1	Tachinus_corticinus	1	0	0	0	0	0	0	0	0	0	0	0	0	0	0	0	0	0	0	0	0	0	0	0	0	0	0	0	0	0	0	0	0	0	0
4ebb562cb799031c39583602966a841523dd5f5c	#N/A	Metazoa	1	Arthropoda	1	Arachnida	1	Araneae	1	Linyphiidae	1	Tapinocyba	1	Tapinocyba_insecta	1	0	0	0	3	0	0	0	1	0	0	0	0	0	0	0	1	0	0	0	0	0	0	0	0	0	0	0	0	0	0	0	1	0	0
1fec1541edff3e523ce6fde513d67200bc7afb4f	#N/A	Metazoa	1	Arthropoda	1	Arachnida	0.99	Araneae	0.96	Linyphiidae	0.96	Tapinocyba	0.94	Tapinocyba_sp	0.93	0	0	0	0	0	0	0	0	0	0	0	0	0	0	0	0	0	0	0	0	0	0	0	0	0	0	0	0	0	0	0	0	0	0
71e9a7aafabcd8bc9f7817f3d2327cd439c1cf30	#N/A	Metazoa	1	Arthropoda	1	Malacostraca	1	Isopoda	1	Trichoniscidae	1	Trichoniscus	1	Trichoniscus_pusillus	1	0	0	0	0	0	0	0	0	0	0	0	0	0	0	0	0	0	0	0	0	0	0	0	0	0	0	0	0	0	0	1	0	0	0
7c68130d69b9ae259a884803c3dfb04e3ac490e7	#N/A	Metazoa	1	Arthropoda	1	Malacostraca	1	Isopoda	1	Trichoniscidae	1	Trichoniscus	1	Trichoniscus_pusillus	1	0	0	0	2	0	0	0	0	0	0	0	0	0	0	0	0	0	0	0	0	0	0	0	0	0	0	0	0	0	0	0	1	1	4
4fab03ef39e2558449121bd2f5aee77e02b1e1ed	#N/A	Metazoa	1	Arthropoda	1	Diplopoda	1	Julida	1	Julidae	1	Unciger	1	Unciger_foetidus	1	0	0	0	0	0	0	0	0	0	0	0	0	0	0	0	0	0	0	0	0	0	0	0	0	0	0	0	0	0	0	0	0	0	0
5c06605d6925d377fe39a346fbacd6da1ca47029	#N/A	Metazoa	1	Arthropoda	1	Diplopoda	1	Julida	1	Julidae	1	Unciger	1	Unciger_foetidus	1	0	0	0	0	0	0	0	1	0	0	0	0	0	0	0	0	0	0	0	0	0	0	0	0	0	0	0	0	0	0	0	0	0	0
c790c7c8f72be0f3a828cad5ac0aa610735febde	#N/A	Metazoa	1	Arthropoda	1	Diplopoda	1	Julida	1	Julidae	1	Unciger	1	Unciger_foetidus	1	0	0	0	0	0	0	0	4	0	0	0	0	0	0	0	0	0	0	0	0	0	0	0	0	0	0	0	0	0	0	0	0	0	0
7e07937afd2507144125407d40c6369fbaa8cdd2	#N/A	Metazoa	0.97	Annelida	0.81	unclassified_Annelida	0.75	unclassified_Annelida	0.52	unclassified_Annelida	0.52	unclassified_Annelida	0.29	unclassified_Annelida_sp	0.18	0	0	0	0	0	0	0	0	0	0	0	0	0	0	0	0	0	0	0	0	0	0	0	0	0	0	1	0	0	0	0	0	0	0
12ed4fc42fc4d37da5dd0b7953add089fa9b2b67	#N/A	Metazoa	1	Arthropoda	1	Insecta	1	Hemiptera	1	Aphididae	0.99	unclassified_Aphididae	0.14	unclassified_Aphididae_sp	0.14	0	0	0	0	0	0	0	0	0	0	0	0	0	0	0	0	4	0	1	0	0	0	0	0	0	0	0	0	0	0	0	0	0	0
da0569c37d3a23877fa6d4074251f10fc33a782e	#N/A	Metazoa	0.99	Arthropoda	0.99	Arachnida	0.87	unclassified_Arachnida	0.76	unclassified_Arachnida	0.75	unclassified_Arachnida	0.75	unclassified_Arachnida_sp	0.75	0	0	0	0	0	0	0	0	0	0	0	0	0	0	0	0	0	0	0	0	0	0	0	0	0	0	0	0	0	0	0	0	0	0
35d2af48fc023a315c7c53c727f015c1176661db	#N/A	Metazoa	0.94	Arthropoda	0.91	Arachnida	0.88	Araneae	0.85	unclassified_Araneae	0.78	unclassified_Araneae	0.78	unclassified_Araneae_sp	0.78	0	0	0	0	0	0	0	0	0	0	0	0	0	0	0	0	0	0	0	0	0	0	0	0	0	0	0	0	0	0	0	0	0	0
8c4d196f59c4edf63a243cde116237e41b6b6a39	#N/A	Metazoa	1	Arthropoda	1	unclassified_Arthropoda	0.78	unclassified_Arthropoda	0.78	unclassified_Arthropoda	0.78	unclassified_Arthropoda	0.78	unclassified_Arthropoda_sp	0.78	0	0	1	0	0	0	0	0	0	0	0	0	0	0	0	0	0	0	0	0	0	0	0	0	0	0	0	0	0	0	0	0	0	0
d4bc7ee8cf593f036f5bcadac714f68c2afd8f14	#N/A	Metazoa	0.84	Arthropoda	0.81	unclassified_Arthropoda	0.78	unclassified_Arthropoda	0.78	unclassified_Arthropoda	0.78	unclassified_Arthropoda	0.78	unclassified_Arthropoda_sp	0.78	0	0	0	0	0	0	0	0	0	0	0	0	0	0	0	0	0	0	0	0	0	0	0	0	0	0	0	0	0	0	0	1	0	0
5d6533a9e8d12fa95060135e199e6e7f706f6590	#N/A	Metazoa	0.82	Arthropoda	0.8	unclassified_Arthropoda	0.78	unclassified_Arthropoda	0.78	unclassified_Arthropoda	0.78	unclassified_Arthropoda	0.78	unclassified_Arthropoda_sp	0.78	3	0	0	0	0	0	0	0	3	0	0	0	0	0	0	0	0	0	0	0	0	0	0	0	0	0	0	0	0	2	0	0	0	0
15f6886279ed634002c08010b9f82856470ad14f	#N/A	Metazoa	0.83	Arthropoda	0.8	unclassified_Arthropoda	0.77	unclassified_Arthropoda	0.76	unclassified_Arthropoda	0.76	unclassified_Arthropoda	0.76	unclassified_Arthropoda_sp	0.76	1	0	0	0	0	0	0	0	0	0	0	0	0	0	0	0	0	0	0	0	0	0	0	0	0	0	0	0	0	0	0	0	0	0
1bdfe6eae248a97bda516119e1d6abc6be46c1d4	#N/A	Metazoa	0.99	Arthropoda	0.93	unclassified_Arthropoda	0.75	unclassified_Arthropoda	0.74	unclassified_Arthropoda	0.74	unclassified_Arthropoda	0.74	unclassified_Arthropoda_sp	0.74	0	0	0	1	0	0	0	0	0	0	0	0	0	0	0	0	0	0	0	0	0	0	0	0	0	0	0	0	0	0	0	0	0	0
9b7674ac6dd7e6c98091f11b4793ae6bed94613c	#N/A	Metazoa	0.91	Arthropoda	0.86	unclassified_Arthropoda	0.76	unclassified_Arthropoda	0.74	unclassified_Arthropoda	0.74	unclassified_Arthropoda	0.74	unclassified_Arthropoda_sp	0.74	0	0	0	0	0	0	0	0	0	0	0	0	0	0	0	0	0	0	0	0	0	0	0	0	0	0	0	0	0	0	0	0	0	0
4599a7c68a932a1a242e3ab9f607f07e69f1ffb2	#N/A	Metazoa	1	Arthropoda	1	unclassified_Arthropoda	0.73	unclassified_Arthropoda	0.73	unclassified_Arthropoda	0.73	unclassified_Arthropoda	0.73	unclassified_Arthropoda_sp	0.73	0	0	0	0	0	0	1	0	0	0	0	0	0	0	0	0	0	0	0	0	0	0	0	0	0	0	0	0	0	0	0	0	0	0
92c0c48c352eb8a2c10e5a2df61ba09aed01f26f	#N/A	Metazoa	0.99	Arthropoda	0.96	unclassified_Arthropoda	0.73	unclassified_Arthropoda	0.73	unclassified_Arthropoda	0.73	unclassified_Arthropoda	0.73	unclassified_Arthropoda_sp	0.73	0	0	0	0	0	0	0	0	0	0	0	0	0	0	0	0	0	0	0	0	0	0	0	0	0	0	0	0	0	0	0	0	0	0
f9468131decfa25b0c5177ad16631db424feda89	#N/A	Metazoa	1	Arthropoda	0.96	unclassified_Arthropoda	0.75	unclassified_Arthropoda	0.75	unclassified_Arthropoda	0.73	unclassified_Arthropoda	0.72	unclassified_Arthropoda_sp	0.64	0	0	0	0	0	0	0	0	0	0	0	0	0	0	0	0	0	0	0	0	0	0	0	0	0	0	0	0	0	0	0	0	0	0
ebb046c6ff88cc230562355783e180503ad7efa6	#N/A	Metazoa	1	Arthropoda	1	unclassified_Arthropoda	0.76	unclassified_Arthropoda	0.76	unclassified_Arthropoda	0.71	unclassified_Arthropoda	0.71	unclassified_Arthropoda_sp	0.69	1	0	0	0	0	0	0	0	0	0	0	0	0	0	0	0	0	0	0	0	0	0	0	0	0	0	0	0	0	0	0	0	0	0
e74ccf61d38eae7dbb77da1943c8e53c1d5fefa7	#N/A	Metazoa	1	Arthropoda	0.98	unclassified_Arthropoda	0.79	unclassified_Arthropoda	0.77	unclassified_Arthropoda	0.71	unclassified_Arthropoda	0.7	unclassified_Arthropoda_sp	0.7	0	0	0	0	0	0	0	0	0	0	0	0	0	0	0	0	0	1	0	0	0	0	0	0	0	0	0	0	0	0	0	0	0	0
49862b7a71030994e3987b0950e51b3c635e4822	#N/A	Metazoa	0.97	Arthropoda	0.96	unclassified_Arthropoda	0.69	unclassified_Arthropoda	0.66	unclassified_Arthropoda	0.66	unclassified_Arthropoda	0.66	unclassified_Arthropoda_sp	0.66	0	0	0	0	0	0	1	0	0	0	0	0	0	0	0	0	0	0	0	0	0	0	0	0	0	0	0	0	0	0	0	0	0	0
44e8af71dbe67da25e59c6eb582a418ed1d625b8	#N/A	Metazoa	0.96	Arthropoda	0.93	unclassified_Arthropoda	0.77	unclassified_Arthropoda	0.76	unclassified_Arthropoda	0.69	unclassified_Arthropoda	0.65	unclassified_Arthropoda_sp	0.65	0	0	0	0	0	0	0	0	0	0	0	0	0	0	0	0	0	0	0	0	0	0	0	0	0	0	0	0	0	0	0	0	0	0
3932d21bb6aa09639c594970af279fa12ac0e750	#N/A	Metazoa	0.98	Arthropoda	0.91	unclassified_Arthropoda	0.62	unclassified_Arthropoda	0.62	unclassified_Arthropoda	0.62	unclassified_Arthropoda	0.62	unclassified_Arthropoda_sp	0.62	0	0	0	0	0	0	1	0	0	0	0	0	0	0	0	0	0	0	0	0	0	0	0	0	0	0	0	0	0	0	0	0	0	0
92d7031b5ae3944c13be7b105ab4e311a909b54b	#N/A	Metazoa	0.92	Arthropoda	0.83	unclassified_Arthropoda	0.61	unclassified_Arthropoda	0.59	unclassified_Arthropoda	0.59	unclassified_Arthropoda	0.59	unclassified_Arthropoda_sp	0.59	0	0	0	0	0	0	0	0	0	0	0	0	0	0	0	0	0	0	0	0	0	0	0	0	0	0	0	0	0	0	0	0	0	0
d270010406fd1fa5aed509ee438f1f3e5a8a02d9	#N/A	Metazoa	1	Arthropoda	0.98	unclassified_Arthropoda	0.79	unclassified_Arthropoda	0.76	unclassified_Arthropoda	0.61	unclassified_Arthropoda	0.58	unclassified_Arthropoda_sp	0.57	2	2	0	4	0	0	0	0	4	2	0	0	5	0	0	0	750	5	0	0	0	0	0	2	0	0	0	0	0	201	0	0	145	7
ad115ce8a1b4bc2e93cccf75edd517bcc376cd27	#N/A	Metazoa	1	Arthropoda	0.98	unclassified_Arthropoda	0.63	unclassified_Arthropoda	0.63	unclassified_Arthropoda	0.59	unclassified_Arthropoda	0.57	unclassified_Arthropoda_sp	0.57	0	0	0	0	0	0	0	0	0	0	0	0	0	0	0	0	0	0	0	0	0	0	0	0	0	0	0	0	0	0	0	0	0	0
51523cbf40226b677aa1eeb331f525409bd4cb4f	#N/A	Metazoa	0.96	Arthropoda	0.89	unclassified_Arthropoda	0.66	unclassified_Arthropoda	0.58	unclassified_Arthropoda	0.56	unclassified_Arthropoda	0.56	unclassified_Arthropoda_sp	0.56	0	0	0	0	0	0	5	0	0	1	0	0	0	0	0	0	0	0	0	0	0	0	0	0	0	0	0	0	0	0	0	0	0	0
f84dd42273dc449018dbe22c760bc9910e4f5aa1	#N/A	Metazoa	0.94	Arthropoda	0.86	unclassified_Arthropoda	0.59	unclassified_Arthropoda	0.58	unclassified_Arthropoda	0.55	unclassified_Arthropoda	0.55	unclassified_Arthropoda_sp	0.55	0	0	0	0	0	0	0	0	0	0	0	0	0	0	0	0	0	0	0	0	0	0	0	0	0	0	0	0	0	0	1	0	0	0
077590caa3be85b610d8b1cecc7dd3a5f9df6fd9	#N/A	Metazoa	0.98	Arthropoda	0.95	unclassified_Arthropoda	0.6	unclassified_Arthropoda	0.59	unclassified_Arthropoda	0.55	unclassified_Arthropoda	0.52	unclassified_Arthropoda_sp	0.52	0	0	0	0	0	0	0	0	0	0	0	0	0	0	0	0	0	0	0	0	0	0	0	0	0	0	0	0	0	0	0	0	0	0
063a29cc63e4f339b2c9f1980387c851ac09d313	#N/A	Metazoa	1	Arthropoda	0.97	unclassified_Arthropoda	0.72	unclassified_Arthropoda	0.7	unclassified_Arthropoda	0.55	unclassified_Arthropoda	0.5	unclassified_Arthropoda_sp	0.5	0	0	0	0	0	0	0	0	0	0	0	0	0	0	0	0	0	0	0	0	2	0	0	0	0	0	0	0	0	0	0	0	0	0
907268cb8d082d3175c0d4456451f4f1ab66e395	#N/A	Metazoa	0.85	Arthropoda	0.81	unclassified_Arthropoda	0.79	unclassified_Arthropoda	0.5	unclassified_Arthropoda	0.5	unclassified_Arthropoda	0.5	unclassified_Arthropoda_sp	0.5	0	0	0	0	0	0	0	0	0	0	0	0	0	0	0	0	0	0	0	0	0	0	0	0	0	0	0	0	0	0	0	0	0	0
307a50d7023c00407c1cf90ad495e10f420340b0	#N/A	Metazoa	0.9	Arthropoda	0.87	unclassified_Arthropoda	0.52	unclassified_Arthropoda	0.48	unclassified_Arthropoda	0.48	unclassified_Arthropoda	0.48	unclassified_Arthropoda_sp	0.48	0	0	0	0	0	0	0	0	0	0	0	0	0	0	0	0	0	0	0	0	0	0	0	0	0	0	0	0	0	0	0	0	0	0
d60870900ad995b48c1ebcdd433e34285ba54cc3	#N/A	Metazoa	0.97	Arthropoda	0.91	unclassified_Arthropoda	0.52	unclassified_Arthropoda	0.51	unclassified_Arthropoda	0.48	unclassified_Arthropoda	0.48	unclassified_Arthropoda_sp	0.48	0	0	0	0	0	0	0	0	0	0	0	0	0	0	0	0	0	0	0	0	0	0	0	0	0	0	0	0	0	0	0	0	0	0
22870957375c34b336a44386c1ba84dc2caab6dd	#N/A	Metazoa	0.98	Arthropoda	0.88	unclassified_Arthropoda	0.68	unclassified_Arthropoda	0.52	unclassified_Arthropoda	0.48	unclassified_Arthropoda	0.48	unclassified_Arthropoda_sp	0.48	12	0	0	0	0	0	0	0	0	0	0	0	0	0	0	0	0	0	0	0	0	0	0	0	0	0	0	0	0	0	0	0	0	0
50c88b29b680a24e686642099e5b5b0fd265c3ec	#N/A	Metazoa	1	Arthropoda	0.93	unclassified_Arthropoda	0.48	unclassified_Arthropoda	0.47	unclassified_Arthropoda	0.47	unclassified_Arthropoda	0.47	unclassified_Arthropoda_sp	0.47	0	0	0	0	0	0	0	0	0	0	0	0	0	0	0	0	0	0	0	0	0	0	0	0	0	0	0	0	0	0	0	0	0	1
b7ccda40db549879b761d18b52880f1ef24cf3fa	#N/A	Metazoa	0.94	Arthropoda	0.9	unclassified_Arthropoda	0.5	unclassified_Arthropoda	0.5	unclassified_Arthropoda	0.5	unclassified_Arthropoda	0.47	unclassified_Arthropoda_sp	0.47	0	0	0	0	0	0	0	0	0	0	0	0	0	1	0	0	0	0	0	0	0	0	0	0	0	0	0	0	0	0	0	0	0	0
d7070818c18115192607ba07e8cc98db9ce86b99	#N/A	Metazoa	1	Arthropoda	0.99	unclassified_Arthropoda	0.58	unclassified_Arthropoda	0.58	unclassified_Arthropoda	0.42	unclassified_Arthropoda	0.42	unclassified_Arthropoda_sp	0.36	0	0	15	0	0	0	0	0	0	0	0	0	0	0	0	0	0	0	0	0	0	0	0	0	0	0	0	0	0	0	0	0	0	0
ebb5c9a1fe6c864a0f49dc31537b928b1e19d0cc	#N/A	Metazoa	1	Arthropoda	0.99	unclassified_Arthropoda	0.71	unclassified_Arthropoda	0.61	unclassified_Arthropoda	0.42	unclassified_Arthropoda	0.4	unclassified_Arthropoda_sp	0.24	0	0	1	0	0	0	0	0	0	0	0	0	0	0	0	0	0	0	0	0	0	0	0	0	0	0	0	0	0	0	0	0	0	0
c4bb0dd169ebb464a77eea11c572ecb47010ba80	#N/A	Metazoa	0.99	Arthropoda	0.94	unclassified_Arthropoda	0.46	unclassified_Arthropoda	0.43	unclassified_Arthropoda	0.42	unclassified_Arthropoda	0.39	unclassified_Arthropoda_sp	0.39	0	0	0	1	0	0	0	0	0	0	0	0	0	0	0	0	0	0	0	0	0	0	0	0	0	0	0	0	0	0	0	0	0	0
ca8aeab2d0723afa9875c1adc75dbb9d5dc72eb7	#N/A	Metazoa	1	Arthropoda	0.85	unclassified_Arthropoda	0.68	unclassified_Arthropoda	0.59	unclassified_Arthropoda	0.4	unclassified_Arthropoda	0.39	unclassified_Arthropoda_sp	0.34	0	0	0	0	0	0	0	0	0	0	0	8	4	579	0	172	12	0	0	221	0	0	0	0	0	0	0	0	0	0	0	0	0	0
c2b304c4d2f48bc9f5fefa8185909bbbd3808074	#N/A	Metazoa	1	Arthropoda	0.99	unclassified_Arthropoda	0.72	unclassified_Arthropoda	0.72	unclassified_Arthropoda	0.5	unclassified_Arthropoda	0.38	unclassified_Arthropoda_sp	0.38	0	0	0	0	0	0	0	0	0	0	0	0	0	0	0	0	0	0	0	0	0	0	0	0	0	0	0	0	0	0	0	0	0	0
c6c8ea256b3cc4217f7bff8294bfc1eedd528377	#N/A	Metazoa	1	Arthropoda	0.97	unclassified_Arthropoda	0.71	unclassified_Arthropoda	0.67	unclassified_Arthropoda	0.37	unclassified_Arthropoda	0.37	unclassified_Arthropoda_sp	0.23	0	0	0	0	0	0	0	0	0	0	0	0	0	0	0	0	0	0	0	0	0	0	0	0	0	0	0	0	0	0	0	0	0	0
88437a1bff3c6f233d3b2ea734d02f9ca7b019fb	#N/A	Metazoa	0.99	Arthropoda	0.84	unclassified_Arthropoda	0.51	unclassified_Arthropoda	0.47	unclassified_Arthropoda	0.36	unclassified_Arthropoda	0.36	unclassified_Arthropoda_sp	0.36	0	0	7	0	0	0	0	0	0	0	0	0	0	0	0	0	0	0	0	0	0	0	0	0	0	0	0	0	0	0	0	0	0	0
142a034479b01f893e20985d4bc7b0f1d2338cff	#N/A	Metazoa	1	Arthropoda	0.97	unclassified_Arthropoda	0.55	unclassified_Arthropoda	0.48	unclassified_Arthropoda	0.35	unclassified_Arthropoda	0.35	unclassified_Arthropoda_sp	0.35	1	0	0	0	0	0	0	0	0	0	0	0	0	0	0	0	0	0	0	0	0	0	0	0	0	0	0	0	0	0	0	0	0	0
50d5705adcc1df5b94b7513dd8a0a604b73d973d	#N/A	Metazoa	0.95	Arthropoda	0.87	unclassified_Arthropoda	0.55	unclassified_Arthropoda	0.47	unclassified_Arthropoda	0.31	unclassified_Arthropoda	0.3	unclassified_Arthropoda_sp	0.28	0	0	0	0	0	0	0	0	0	0	0	0	0	0	0	0	0	0	0	0	0	0	0	0	0	0	0	0	0	0	0	0	0	0
c31d940abd9535cb44c74c9c72f9cdf6a1eb94e6	#N/A	Metazoa	1	Arthropoda	0.83	unclassified_Arthropoda	0.35	unclassified_Arthropoda	0.29	unclassified_Arthropoda	0.29	unclassified_Arthropoda	0.29	unclassified_Arthropoda_sp	0.29	0	0	0	0	0	0	0	0	0	0	0	0	0	0	0	0	0	0	0	0	0	0	0	0	0	0	0	0	0	0	0	0	0	0
d917e8f8468dfb11eb410126633f9d08a8b2df9a	#N/A	Metazoa	1	Arthropoda	0.94	unclassified_Arthropoda	0.31	unclassified_Arthropoda	0.31	unclassified_Arthropoda	0.3	unclassified_Arthropoda	0.29	unclassified_Arthropoda_sp	0.29	0	0	0	0	0	0	0	0	0	0	0	0	0	0	0	0	0	0	0	0	0	0	0	0	0	0	0	0	0	0	0	0	0	0
eaad3378a950113ca35ce0dedc868a7f805eb0a2	#N/A	Metazoa	1	Arthropoda	0.99	unclassified_Arthropoda	0.49	unclassified_Arthropoda	0.46	unclassified_Arthropoda	0.37	unclassified_Arthropoda	0.29	unclassified_Arthropoda_sp	0.29	0	0	0	0	0	0	0	0	0	0	0	0	0	0	0	0	0	0	0	0	0	0	0	0	0	1	0	0	0	0	0	0	0	0
62cd1405821a587b144067a1f9397cc6908872b5	#N/A	Metazoa	1	Arthropoda	0.99	unclassified_Arthropoda	0.44	unclassified_Arthropoda	0.41	unclassified_Arthropoda	0.3	unclassified_Arthropoda	0.29	unclassified_Arthropoda_sp	0.09	0	0	0	0	0	0	0	0	0	0	0	0	0	0	0	0	12	0	0	0	0	0	0	0	0	0	0	0	0	0	0	0	0	0
ce5451b154c6ecbfb5b9b0537f98fbc57c469da7	#N/A	Metazoa	1	Arthropoda	0.92	unclassified_Arthropoda	0.36	unclassified_Arthropoda	0.29	unclassified_Arthropoda	0.29	unclassified_Arthropoda	0.28	unclassified_Arthropoda_sp	0.28	0	0	0	0	0	0	0	0	0	0	0	0	0	0	0	0	0	0	0	0	0	0	0	0	0	0	0	0	0	0	0	0	0	0
02890a601c20de0ce86e6dbcd4e4a339fe0f298e	#N/A	Metazoa	1	Arthropoda	0.95	unclassified_Arthropoda	0.59	unclassified_Arthropoda	0.57	unclassified_Arthropoda	0.38	unclassified_Arthropoda	0.27	unclassified_Arthropoda_sp	0.27	0	0	0	0	0	0	0	0	0	0	0	0	0	0	0	0	0	0	0	0	0	0	0	0	0	0	0	0	0	0	0	0	0	0
620b44df928a3a7dd490ef7b4f5b4a261a01cdac	#N/A	Metazoa	1	Arthropoda	0.9	unclassified_Arthropoda	0.57	unclassified_Arthropoda	0.5	unclassified_Arthropoda	0.27	unclassified_Arthropoda	0.27	unclassified_Arthropoda_sp	0.27	0	0	0	0	0	0	0	0	1	0	0	0	0	0	1	1	0	0	0	0	0	0	0	0	0	0	0	0	0	0	0	0	0	0
32ececd11606067d98fb9308ee8684994e4c4b2c	#N/A	Metazoa	1	Arthropoda	0.98	unclassified_Arthropoda	0.34	unclassified_Arthropoda	0.34	unclassified_Arthropoda	0.27	unclassified_Arthropoda	0.26	unclassified_Arthropoda_sp	0.26	0	0	0	0	0	0	0	0	0	0	0	0	0	0	0	0	0	0	0	0	0	0	0	0	1	0	0	0	0	0	0	0	0	0
c21d18e48f3a9a7acf6bc554ba29968598972412	#N/A	Metazoa	0.9	Arthropoda	0.84	unclassified_Arthropoda	0.34	unclassified_Arthropoda	0.27	unclassified_Arthropoda	0.26	unclassified_Arthropoda	0.26	unclassified_Arthropoda_sp	0.26	0	0	0	0	0	1	0	0	0	0	0	0	0	0	0	0	0	0	0	0	0	0	0	0	0	0	0	0	0	0	0	0	0	0
12dc14c3096b9d9777871299e5841cab07822b6c	#N/A	Metazoa	1	Arthropoda	0.82	unclassified_Arthropoda	0.3	unclassified_Arthropoda	0.26	unclassified_Arthropoda	0.26	unclassified_Arthropoda	0.25	unclassified_Arthropoda_sp	0.25	0	0	0	0	0	0	0	0	0	0	0	0	0	0	0	0	0	0	0	0	0	1	0	0	0	0	0	0	0	0	0	0	0	0
cfe2583a24d591f042a44d70c1faa0ed20460757	#N/A	Metazoa	1	Arthropoda	1	unclassified_Arthropoda	0.38	unclassified_Arthropoda	0.36	unclassified_Arthropoda	0.25	unclassified_Arthropoda	0.25	unclassified_Arthropoda_sp	0.11	0	0	0	0	0	0	0	0	0	0	0	0	0	0	0	0	0	0	0	2	0	0	0	0	0	0	0	0	0	0	0	0	0	0
c569017db6765d7ae3d79b9d66c6ea25eb73814d	#N/A	Metazoa	1	Arthropoda	0.83	unclassified_Arthropoda	0.32	unclassified_Arthropoda	0.24	unclassified_Arthropoda	0.24	unclassified_Arthropoda	0.24	unclassified_Arthropoda_sp	0.24	0	0	0	0	0	0	0	0	0	0	3	6	2	0	0	0	14	2	58	0	6	17	0	0	0	0	0	0	0	0	0	0	0	0
55c4e357aec598dde6ae507c911bd91fb087cb47	#N/A	Metazoa	0.98	Arthropoda	0.89	unclassified_Arthropoda	0.43	unclassified_Arthropoda	0.24	unclassified_Arthropoda	0.24	unclassified_Arthropoda	0.23	unclassified_Arthropoda_sp	0.23	0	0	0	0	0	0	0	0	0	0	0	0	0	0	0	0	0	0	0	0	0	0	0	0	0	0	0	0	0	0	0	0	0	0
07f01e630c30feb98326c295b5f5812cf5424d9d	#N/A	Metazoa	1	Arthropoda	0.93	unclassified_Arthropoda	0.52	unclassified_Arthropoda	0.39	unclassified_Arthropoda	0.23	unclassified_Arthropoda	0.23	unclassified_Arthropoda_sp	0.11	0	0	0	0	0	0	0	0	0	0	0	0	0	0	0	0	0	0	0	0	0	0	0	0	0	0	0	0	0	0	0	0	0	0
1d995c8792bf6d6c4449419544a1c97323e52cb0	#N/A	Metazoa	0.96	Arthropoda	0.8	unclassified_Arthropoda	0.57	unclassified_Arthropoda	0.36	unclassified_Arthropoda	0.22	unclassified_Arthropoda	0.22	unclassified_Arthropoda_sp	0.2	0	0	0	0	0	0	0	0	0	0	0	0	0	0	0	0	0	0	0	0	0	0	0	0	0	0	0	0	0	0	0	0	0	0
a6f92b06dcd60a417f69fe5cf16dc6a80fb1d373	#N/A	Metazoa	0.98	Arthropoda	0.85	unclassified_Arthropoda	0.23	unclassified_Arthropoda	0.21	unclassified_Arthropoda	0.21	unclassified_Arthropoda	0.2	unclassified_Arthropoda_sp	0.19	0	0	0	0	0	0	0	0	0	0	0	0	0	1	0	0	0	0	0	0	0	0	0	0	0	0	0	0	0	0	0	0	0	0
d75b3cc238f6e7815c2d6f882a0d52729ae1ccf6	#N/A	Metazoa	0.99	Arthropoda	0.93	unclassified_Arthropoda	0.67	unclassified_Arthropoda	0.26	unclassified_Arthropoda	0.17	unclassified_Arthropoda	0.17	unclassified_Arthropoda_sp	0.17	0	0	0	0	0	0	0	0	0	0	0	0	0	0	0	0	0	0	0	0	0	0	0	0	0	0	0	0	0	0	0	1	0	0
ed9f3a24b67e3e3f8294b40f963372e0555d5f37	#N/A	Metazoa	0.99	Arthropoda	0.93	unclassified_Arthropoda	0.7	unclassified_Arthropoda	0.32	unclassified_Arthropoda	0.17	unclassified_Arthropoda	0.17	unclassified_Arthropoda_sp	0.07	0	0	0	0	0	0	0	0	0	0	0	0	0	0	0	0	151	0	0	0	0	0	0	0	0	0	0	0	0	0	0	0	0	0
0a741b33ec781e203712799d5daa74a9a514cc0a	#N/A	Metazoa	0.99	Arthropoda	0.9	unclassified_Arthropoda	0.17	unclassified_Arthropoda	0.16	unclassified_Arthropoda	0.16	unclassified_Arthropoda	0.16	unclassified_Arthropoda_sp	0.16	0	0	0	0	0	0	0	0	0	0	0	0	0	1	0	0	0	0	0	0	0	0	0	0	0	0	0	0	0	0	0	0	0	0
3edd5587684c054d0040aaf0d0a80e9b347b290d	#N/A	Metazoa	1	Arthropoda	0.98	unclassified_Arthropoda	0.5	unclassified_Arthropoda	0.43	unclassified_Arthropoda	0.16	unclassified_Arthropoda	0.16	unclassified_Arthropoda_sp	0.16	0	0	0	0	0	0	0	0	2	0	0	0	1	0	1	3	0	0	0	0	0	0	0	0	0	0	0	0	0	0	0	0	0	1
a28496d79bcd26e779392bb53b77187c3af02286	#N/A	Metazoa	1	Arthropoda	0.98	unclassified_Arthropoda	0.31	unclassified_Arthropoda	0.21	unclassified_Arthropoda	0.16	unclassified_Arthropoda	0.16	unclassified_Arthropoda_sp	0.11	0	0	0	0	0	0	0	0	0	0	0	0	0	0	0	0	0	0	0	0	0	0	0	0	1	0	0	2	0	0	0	0	0	0
bb51f14ec880a0f73de091877ddcb0d5fb2fe4cc	#N/A	Metazoa	0.96	Arthropoda	0.84	unclassified_Arthropoda	0.76	unclassified_Arthropoda	0.57	unclassified_Arthropoda	0.17	unclassified_Arthropoda	0.15	unclassified_Arthropoda_sp	0.15	0	0	0	0	0	0	0	1	0	0	0	0	0	0	0	0	0	0	0	0	0	0	0	0	0	0	0	0	0	0	0	0	0	0
c0754265e92bbedf1a4edff7e8b2b0deb44bb7ac	#N/A	Metazoa	1	Arthropoda	1	unclassified_Arthropoda	0.33	unclassified_Arthropoda	0.3	unclassified_Arthropoda	0.15	unclassified_Arthropoda	0.15	unclassified_Arthropoda_sp	0.15	0	0	0	0	0	0	0	0	0	0	0	0	0	0	0	0	0	0	0	0	0	0	0	0	0	0	0	0	0	0	0	0	0	0
e7db3e38e6cea7f6575a81a57b54c1f73dc40d55	#N/A	Metazoa	0.95	Arthropoda	0.9	unclassified_Arthropoda	0.75	unclassified_Arthropoda	0.46	unclassified_Arthropoda	0.18	unclassified_Arthropoda	0.15	unclassified_Arthropoda_sp	0.15	0	0	0	0	0	0	0	0	0	0	0	0	0	0	0	0	0	0	0	0	0	0	0	0	0	0	0	0	0	0	0	0	0	0
4c2804d4dccf66b1acfc925f0920b3680b429414	#N/A	Metazoa	1	Arthropoda	0.93	unclassified_Arthropoda	0.32	unclassified_Arthropoda	0.28	unclassified_Arthropoda	0.15	unclassified_Arthropoda	0.15	unclassified_Arthropoda_sp	0.06	0	0	0	0	0	0	0	0	0	0	0	0	0	0	0	0	0	0	0	0	0	0	0	0	0	0	0	0	0	0	0	0	0	0
5d0de0958c1b6a03e4f5b26c429909a42da7ee58	#N/A	Metazoa	0.99	Arthropoda	0.87	unclassified_Arthropoda	0.17	unclassified_Arthropoda	0.17	unclassified_Arthropoda	0.14	unclassified_Arthropoda	0.14	unclassified_Arthropoda_sp	0.14	0	0	0	0	0	0	0	0	0	0	0	0	0	0	0	1	0	0	0	0	0	0	0	0	0	0	0	0	0	0	0	0	0	0
8194a4c9dcf7f5a1d2ddc66c8011d99d3d90006e	#N/A	Metazoa	1	Arthropoda	0.93	unclassified_Arthropoda	0.29	unclassified_Arthropoda	0.26	unclassified_Arthropoda	0.17	unclassified_Arthropoda	0.14	unclassified_Arthropoda_sp	0.14	0	0	0	0	0	0	0	0	0	0	0	0	0	3	0	0	0	0	0	0	0	0	0	0	0	0	0	0	0	0	0	0	0	0
41424af6310bb97cc11527231a72f580bd3c2986	#N/A	Metazoa	0.93	Arthropoda	0.84	unclassified_Arthropoda	0.72	unclassified_Arthropoda	0.68	unclassified_Arthropoda	0.14	unclassified_Arthropoda	0.14	unclassified_Arthropoda_sp	0.11	0	0	0	0	0	0	0	0	0	0	0	0	0	0	0	1	0	0	0	0	0	0	0	0	0	0	0	0	0	0	0	0	0	0
90b9f62a2374a0faefd8be026b1cfccf1c9437c2	#N/A	Metazoa	1	Arthropoda	0.98	unclassified_Arthropoda	0.25	unclassified_Arthropoda	0.19	unclassified_Arthropoda	0.14	unclassified_Arthropoda	0.14	unclassified_Arthropoda_sp	0.11	0	0	0	0	0	0	0	0	0	0	0	0	0	0	1	0	0	0	0	0	0	0	0	0	0	0	0	0	0	0	0	0	0	0
85f9fbc4c80150b1a19b8b4f1dcc828d5c265d1b	#N/A	Metazoa	1	Arthropoda	0.97	unclassified_Arthropoda	0.78	unclassified_Arthropoda	0.2	unclassified_Arthropoda	0.14	unclassified_Arthropoda	0.14	unclassified_Arthropoda_sp	0.03	0	0	0	0	0	0	0	0	0	0	0	0	0	0	0	1	0	0	0	0	0	0	0	0	0	0	0	0	0	0	0	0	0	0
d72deeabb9df3eb5fc52c4a64f00e5c660449ca6	#N/A	Metazoa	0.99	Arthropoda	0.8	unclassified_Arthropoda	0.35	unclassified_Arthropoda	0.2	unclassified_Arthropoda	0.13	unclassified_Arthropoda	0.13	unclassified_Arthropoda_sp	0.13	0	0	0	0	0	0	0	0	0	0	0	0	0	0	0	0	0	0	0	0	0	0	0	0	0	0	0	0	0	0	0	0	0	0
730fad89f013828a483d94faa369a9cd2e8e9506	#N/A	Metazoa	0.99	Arthropoda	0.95	unclassified_Arthropoda	0.25	unclassified_Arthropoda	0.17	unclassified_Arthropoda	0.13	unclassified_Arthropoda	0.13	unclassified_Arthropoda_sp	0.13	0	0	1	0	0	2	0	0	0	0	0	0	0	0	0	0	0	0	0	0	0	0	0	0	0	0	0	0	0	0	0	0	0	0
79fcd003b81f43815615c30e25f4ec6372661e5b	#N/A	Metazoa	1	Arthropoda	0.99	unclassified_Arthropoda	0.48	unclassified_Arthropoda	0.44	unclassified_Arthropoda	0.13	unclassified_Arthropoda	0.13	unclassified_Arthropoda_sp	0.13	0	0	0	0	0	0	0	0	0	0	1	0	0	0	0	0	1	0	0	0	0	0	0	0	0	0	0	0	0	0	0	0	0	0
b54b2584770c896206edb8a20bc6a19d2d36f663	#N/A	Metazoa	0.99	Arthropoda	0.96	unclassified_Arthropoda	0.79	unclassified_Arthropoda	0.57	unclassified_Arthropoda	0.14	unclassified_Arthropoda	0.13	unclassified_Arthropoda_sp	0.13	0	0	0	0	0	0	0	0	0	0	0	0	0	0	0	0	0	0	0	0	0	0	0	0	0	0	0	0	0	0	0	0	0	0
425dd55a69e48ce2c09ba6e7f86b11b01dee9415	#N/A	Metazoa	1	Arthropoda	0.94	unclassified_Arthropoda	0.74	unclassified_Arthropoda	0.72	unclassified_Arthropoda	0.28	unclassified_Arthropoda	0.13	unclassified_Arthropoda_sp	0.12	0	0	0	0	0	0	0	0	0	0	0	0	0	0	0	0	0	0	0	0	0	0	0	0	0	0	0	0	0	0	0	0	0	0
bc23001df1bf493f9850a511a811e821b2d46e9c	#N/A	Metazoa	0.94	Arthropoda	0.82	unclassified_Arthropoda	0.17	unclassified_Arthropoda	0.15	unclassified_Arthropoda	0.14	unclassified_Arthropoda	0.13	unclassified_Arthropoda_sp	0.12	0	0	0	0	0	0	0	0	0	0	0	0	0	1	0	0	0	0	0	0	0	0	0	0	0	0	0	0	0	0	0	0	0	0
50db86841da694ca1ca620e3c9505e8f874c3e66	#N/A	Metazoa	1	Arthropoda	0.93	unclassified_Arthropoda	0.16	unclassified_Arthropoda	0.13	unclassified_Arthropoda	0.13	unclassified_Arthropoda	0.13	unclassified_Arthropoda_sp	0.12	0	0	0	0	0	0	3	0	2	0	0	3	3	3	0	11	15	0	6	28	0	0	1	1	0	0	0	0	0	0	0	0	0	0
602810a4af8027ae6e3d2f3c98d735eb2d2bf5af	#N/A	Metazoa	0.99	Arthropoda	0.93	unclassified_Arthropoda	0.57	unclassified_Arthropoda	0.38	unclassified_Arthropoda	0.18	unclassified_Arthropoda	0.13	unclassified_Arthropoda_sp	0.11	0	0	0	0	0	0	0	0	0	0	0	0	0	0	0	0	0	0	0	70	0	0	0	0	0	0	0	0	0	0	0	0	0	0
7aba8048891bdc56aa1339a0dfdce23b87d9761e	#N/A	Metazoa	0.98	Arthropoda	0.8	unclassified_Arthropoda	0.67	unclassified_Arthropoda	0.31	unclassified_Arthropoda	0.15	unclassified_Arthropoda	0.13	unclassified_Arthropoda_sp	0.09	0	0	0	0	0	0	0	0	0	0	0	0	0	0	0	0	0	0	0	0	0	0	0	0	0	0	0	0	0	0	0	0	0	0
279c3068dc7004db9d59764a741eb03c7850dcae	#N/A	Metazoa	1	Arthropoda	0.8	unclassified_Arthropoda	0.53	unclassified_Arthropoda	0.16	unclassified_Arthropoda	0.12	unclassified_Arthropoda	0.12	unclassified_Arthropoda_sp	0.12	0	0	0	0	0	0	0	0	0	0	0	0	0	0	0	0	0	0	0	0	0	0	0	0	0	0	0	0	0	1	0	0	0	0
706e966e47033e98f61e1ad5d6f6ea9f2a6a6be4	#N/A	Metazoa	1	Arthropoda	0.96	unclassified_Arthropoda	0.73	unclassified_Arthropoda	0.67	unclassified_Arthropoda	0.44	unclassified_Arthropoda	0.12	unclassified_Arthropoda_sp	0.12	0	0	0	0	0	0	0	0	0	0	0	0	0	0	0	0	0	0	0	0	0	0	0	0	0	0	0	0	0	0	0	0	0	0
d1c388c066dc4c7fff9c2f202c4b328d3039987a	#N/A	Metazoa	0.97	Arthropoda	0.82	unclassified_Arthropoda	0.4	unclassified_Arthropoda	0.34	unclassified_Arthropoda	0.26	unclassified_Arthropoda	0.12	unclassified_Arthropoda_sp	0.12	0	0	0	0	0	0	0	0	0	0	0	0	0	0	0	0	0	0	0	0	0	0	2	0	0	0	0	0	0	0	0	0	0	0
542f2e7d5ba74313470a8cf2e465414e74bbcbd0	#N/A	Metazoa	0.99	Arthropoda	0.8	unclassified_Arthropoda	0.25	unclassified_Arthropoda	0.12	unclassified_Arthropoda	0.12	unclassified_Arthropoda	0.12	unclassified_Arthropoda_sp	0.12	0	0	0	0	0	0	0	0	0	0	0	0	0	0	0	0	0	0	1	0	0	0	0	0	0	0	0	0	0	0	0	0	0	0
7fd90275014d1ed02dfd696bf1bc33593d6fa05e	#N/A	Metazoa	0.94	Arthropoda	0.83	unclassified_Arthropoda	0.68	unclassified_Arthropoda	0.36	unclassified_Arthropoda	0.22	unclassified_Arthropoda	0.12	unclassified_Arthropoda_sp	0.11	0	0	0	0	0	0	0	0	0	0	0	0	0	0	0	0	0	0	0	0	0	0	0	1	0	0	0	0	0	0	0	0	0	0
401b33deea98c2b830a11df0d9d98b582261dba7	#N/A	Metazoa	1	Arthropoda	0.87	unclassified_Arthropoda	0.74	unclassified_Arthropoda	0.2	unclassified_Arthropoda	0.12	unclassified_Arthropoda	0.12	unclassified_Arthropoda_sp	0.1	0	0	0	0	0	0	0	0	0	0	0	0	0	0	0	0	0	0	0	0	0	0	0	0	0	0	0	0	0	0	0	0	0	0
a9b71bcb6262115e003ad6507fff2a1a139f42d6	#N/A	Metazoa	0.95	Arthropoda	0.91	unclassified_Arthropoda	0.78	unclassified_Arthropoda	0.35	unclassified_Arthropoda	0.12	unclassified_Arthropoda	0.12	unclassified_Arthropoda_sp	0.09	0	0	0	0	0	0	1	0	0	0	0	0	0	0	0	0	0	0	0	0	0	0	0	0	0	0	0	0	0	0	0	0	0	0
4166a3614cd449db60a7ac125d7e981a87e3a7a0	#N/A	Metazoa	1	Arthropoda	1	unclassified_Arthropoda	0.7	unclassified_Arthropoda	0.68	unclassified_Arthropoda	0.12	unclassified_Arthropoda	0.12	unclassified_Arthropoda_sp	0.06	0	0	0	0	0	0	0	1	0	0	0	0	0	0	0	0	0	0	0	0	0	0	0	0	0	0	0	0	0	0	0	0	0	0
a70549b5db32892d0211f348725b7e7e4b60c2f4	#N/A	Metazoa	0.99	Arthropoda	0.96	unclassified_Arthropoda	0.42	unclassified_Arthropoda	0.32	unclassified_Arthropoda	0.24	unclassified_Arthropoda	0.12	unclassified_Arthropoda_sp	0.05	0	0	0	0	0	0	0	0	0	0	0	0	0	0	0	0	0	0	0	0	0	0	0	0	0	0	0	0	0	0	0	0	0	0
2b04031d4f2b150ca129ccaaff98aa7003d855b1	#N/A	Metazoa	1	Arthropoda	0.86	unclassified_Arthropoda	0.59	unclassified_Arthropoda	0.19	unclassified_Arthropoda	0.11	unclassified_Arthropoda	0.11	unclassified_Arthropoda_sp	0.11	0	0	0	0	0	0	0	0	0	0	0	0	0	0	0	0	0	0	0	0	0	0	1	0	0	0	0	0	0	0	0	0	0	0
3d967748c722fd4462d3bc62a01a28e9e23e3564	#N/A	Metazoa	1	Arthropoda	0.94	unclassified_Arthropoda	0.72	unclassified_Arthropoda	0.62	unclassified_Arthropoda	0.12	unclassified_Arthropoda	0.11	unclassified_Arthropoda_sp	0.11	0	0	0	0	0	0	0	0	0	0	0	0	0	0	0	1	0	0	0	0	0	0	0	0	0	0	0	0	0	0	0	0	0	0
d90a6c6a4224aa49c74bbdae2e3758e9ec41760b	#N/A	Metazoa	0.98	Arthropoda	0.93	unclassified_Arthropoda	0.31	unclassified_Arthropoda	0.28	unclassified_Arthropoda	0.15	unclassified_Arthropoda	0.11	unclassified_Arthropoda_sp	0.11	0	0	0	0	0	0	0	0	0	0	0	0	0	0	0	0	0	0	0	0	0	0	0	0	0	0	0	0	0	0	0	0	0	0
8708aa779965d9f72a680ec24e1562face186786	#N/A	Metazoa	1	Arthropoda	0.97	unclassified_Arthropoda	0.32	unclassified_Arthropoda	0.25	unclassified_Arthropoda	0.11	unclassified_Arthropoda	0.11	unclassified_Arthropoda_sp	0.11	0	0	0	0	0	0	0	0	1	0	0	0	0	0	0	0	0	0	0	0	0	0	0	0	0	0	0	0	0	0	0	0	0	0
41cbf67bdf61ce2b7fc16d4defae0d36d09d672d	#N/A	Metazoa	1	Arthropoda	0.96	unclassified_Arthropoda	0.74	unclassified_Arthropoda	0.3	unclassified_Arthropoda	0.22	unclassified_Arthropoda	0.11	unclassified_Arthropoda_sp	0.07	0	0	0	0	0	0	0	0	0	0	0	0	0	0	0	0	0	0	0	1	0	0	0	0	0	0	0	0	0	0	0	0	0	0
f0ae3379ffcc6a650ab6c7f0acba7e8d2f53781a	#N/A	Metazoa	1	Arthropoda	0.9	unclassified_Arthropoda	0.48	unclassified_Arthropoda	0.16	unclassified_Arthropoda	0.12	unclassified_Arthropoda	0.11	unclassified_Arthropoda_sp	0.07	0	0	0	0	0	0	0	0	0	0	0	0	0	0	0	0	0	0	0	0	0	0	0	0	0	0	0	0	0	0	0	0	0	0
ecc02d3680e38e4933fa7ac1ed436c619c24ca08	#N/A	Metazoa	0.98	Arthropoda	0.93	unclassified_Arthropoda	0.71	unclassified_Arthropoda	0.44	unclassified_Arthropoda	0.27	unclassified_Arthropoda	0.11	unclassified_Arthropoda_sp	0.03	0	0	0	0	0	0	0	0	0	0	0	0	0	0	0	0	0	0	0	5	1	0	0	0	0	0	0	0	0	0	0	0	1	0
2fb570385960cd2270064fbc74d9c322ae768028	#N/A	Metazoa	0.99	Arthropoda	0.94	unclassified_Arthropoda	0.49	unclassified_Arthropoda	0.15	unclassified_Arthropoda	0.11	unclassified_Arthropoda	0.11	unclassified_Arthropoda_sp	0.02	0	0	0	1	0	0	0	0	0	0	0	0	0	0	0	0	0	0	0	0	0	0	0	0	0	0	0	0	0	0	0	0	0	0
7c19795b74d08075eaf66aa68e40e6d6d594fabd	#N/A	Metazoa	1	Arthropoda	0.93	unclassified_Arthropoda	0.53	unclassified_Arthropoda	0.41	unclassified_Arthropoda	0.19	unclassified_Arthropoda	0.1	unclassified_Arthropoda_sp	0.1	0	0	0	0	0	0	0	0	0	0	0	0	0	0	0	0	0	0	0	0	0	0	0	0	0	0	0	0	0	0	0	0	0	0
d0876e4b1ff11f860b48888f53e018bd43062056	#N/A	Metazoa	1	Arthropoda	0.98	unclassified_Arthropoda	0.46	unclassified_Arthropoda	0.46	unclassified_Arthropoda	0.3	unclassified_Arthropoda	0.1	unclassified_Arthropoda_sp	0.1	0	0	0	0	0	0	0	0	0	0	0	0	0	0	0	0	0	0	0	0	0	0	0	0	1	3	1	0	0	0	0	0	0	0
15652c944457647caeec1a153d90de89eb542aa3	#N/A	Metazoa	1	Arthropoda	0.99	unclassified_Arthropoda	0.23	unclassified_Arthropoda	0.21	unclassified_Arthropoda	0.1	unclassified_Arthropoda	0.1	unclassified_Arthropoda_sp	0.1	0	0	0	0	0	0	0	0	0	0	0	0	0	0	0	0	0	0	0	0	0	0	0	0	0	0	0	0	0	0	0	0	0	0
2af23f558c58cdda073ff3e809171069f64d7c08	#N/A	Metazoa	1	Arthropoda	0.92	unclassified_Arthropoda	0.69	unclassified_Arthropoda	0.14	unclassified_Arthropoda	0.11	unclassified_Arthropoda	0.1	unclassified_Arthropoda_sp	0.1	0	0	0	0	0	0	6	0	0	0	1	0	0	0	14	0	0	0	0	0	0	0	0	0	0	0	0	0	0	0	0	0	0	0
dc9fcbef866820e517fe739a6d19958dcb01d30e	#N/A	Metazoa	0.9	Arthropoda	0.81	unclassified_Arthropoda	0.56	unclassified_Arthropoda	0.47	unclassified_Arthropoda	0.12	unclassified_Arthropoda	0.1	unclassified_Arthropoda_sp	0.06	0	0	0	0	0	0	0	0	0	0	0	0	0	0	0	0	0	0	0	0	0	0	0	0	0	0	0	0	0	0	0	0	0	0
17d15d96145ef9b9f93558b58ec1d175fc1ef67d	#N/A	Metazoa	0.89	Arthropoda	0.8	unclassified_Arthropoda	0.6	unclassified_Arthropoda	0.16	unclassified_Arthropoda	0.1	unclassified_Arthropoda	0.1	unclassified_Arthropoda_sp	0.02	0	0	0	0	0	0	0	0	0	0	0	0	0	0	0	0	0	0	0	0	0	0	0	0	0	0	0	0	0	1	0	0	0	0
48906c1fa025c7ad688490bd8bd16aff653d3870	#N/A	Metazoa	0.98	Arthropoda	0.89	unclassified_Arthropoda	0.78	unclassified_Arthropoda	0.26	unclassified_Arthropoda	0.12	unclassified_Arthropoda	0.09	unclassified_Arthropoda_sp	0.09	0	0	0	0	0	0	0	0	0	0	0	0	0	0	0	0	0	0	0	0	0	0	0	0	0	0	0	0	0	1	0	0	0	0
a63b2b4fa79f8bdd140ffa2c486c2d3613f3a52e	#N/A	Metazoa	1	Arthropoda	0.97	unclassified_Arthropoda	0.33	unclassified_Arthropoda	0.21	unclassified_Arthropoda	0.09	unclassified_Arthropoda	0.09	unclassified_Arthropoda_sp	0.09	0	0	0	0	0	0	0	0	0	0	0	2	0	0	0	0	0	0	0	0	0	0	0	0	0	0	0	0	0	0	0	0	0	0
efd92072bc76e1abad42cdc83ee950eeeb8c234d	#N/A	Metazoa	1	Arthropoda	0.81	unclassified_Arthropoda	0.11	unclassified_Arthropoda	0.09	unclassified_Arthropoda	0.09	unclassified_Arthropoda	0.09	unclassified_Arthropoda_sp	0.09	0	0	0	0	0	0	0	0	0	0	0	0	0	0	0	0	0	0	0	0	0	0	0	3	0	0	0	0	0	0	0	0	0	0
a8bbb09f0180748a11b8f0c3f8c8a20710115381	#N/A	Metazoa	0.99	Arthropoda	0.81	unclassified_Arthropoda	0.56	unclassified_Arthropoda	0.17	unclassified_Arthropoda	0.09	unclassified_Arthropoda	0.09	unclassified_Arthropoda_sp	0.09	0	0	0	0	0	0	0	0	0	0	4	11	1	27	1	10	0	0	10	3	6	0	7	1	0	0	0	0	0	0	0	0	0	0
b77c0ec4b3832f4c70b4a6716751a0a0364e8677	#N/A	Metazoa	1	Arthropoda	0.9	unclassified_Arthropoda	0.58	unclassified_Arthropoda	0.36	unclassified_Arthropoda	0.09	unclassified_Arthropoda	0.09	unclassified_Arthropoda_sp	0.08	0	0	0	0	0	1	0	0	0	0	0	0	0	0	0	0	0	0	0	0	0	0	0	0	0	0	0	0	0	0	0	0	0	0
4275d6f0176ba31fa9be2bd8770900e8b324fd8f	#N/A	Metazoa	0.98	Arthropoda	0.86	unclassified_Arthropoda	0.15	unclassified_Arthropoda	0.12	unclassified_Arthropoda	0.09	unclassified_Arthropoda	0.09	unclassified_Arthropoda_sp	0.02	0	0	0	0	0	0	0	0	0	0	0	0	0	0	0	0	0	0	0	0	0	0	0	0	0	0	0	0	0	0	0	0	0	0
289e3e324be5a1e6a8a7c9d628d5b8d9168e4b5c	#N/A	Metazoa	0.99	Arthropoda	0.97	unclassified_Arthropoda	0.71	unclassified_Arthropoda	0.29	unclassified_Arthropoda	0.08	unclassified_Arthropoda	0.08	unclassified_Arthropoda_sp	0.08	0	0	0	0	0	0	0	0	0	0	0	0	0	0	0	0	0	0	0	0	0	0	0	0	0	0	0	0	0	0	0	0	0	0
3077bdad3b8607864465b0f6e5e1ad2febb7741a	#N/A	Metazoa	0.99	Arthropoda	0.95	unclassified_Arthropoda	0.12	unclassified_Arthropoda	0.08	unclassified_Arthropoda	0.08	unclassified_Arthropoda	0.08	unclassified_Arthropoda_sp	0.08	1	0	0	0	0	0	0	0	0	0	0	0	0	0	0	0	0	0	0	0	0	0	0	0	0	0	0	0	0	0	0	0	0	0
33aafbf92c481856a980cd1063eab12372706692	#N/A	Metazoa	1	Arthropoda	0.96	unclassified_Arthropoda	0.7	unclassified_Arthropoda	0.32	unclassified_Arthropoda	0.14	unclassified_Arthropoda	0.08	unclassified_Arthropoda_sp	0.08	0	0	1	0	0	0	0	0	0	0	0	0	0	0	0	0	0	0	0	0	0	0	0	0	0	0	0	0	0	0	0	0	0	0
05ad90814d6d84e2b486d3ab6766048346901ee3	#N/A	Metazoa	0.97	Arthropoda	0.91	unclassified_Arthropoda	0.79	unclassified_Arthropoda	0.25	unclassified_Arthropoda	0.13	unclassified_Arthropoda	0.08	unclassified_Arthropoda_sp	0.08	0	0	0	0	0	0	0	0	0	0	0	0	0	0	0	0	0	0	0	0	0	0	0	0	0	0	0	0	0	0	0	0	0	0
5458b2f7bf5178a4a441a0d9500a8b9956bb2dcd	#N/A	Metazoa	0.97	Arthropoda	0.94	unclassified_Arthropoda	0.65	unclassified_Arthropoda	0.55	unclassified_Arthropoda	0.08	unclassified_Arthropoda	0.08	unclassified_Arthropoda_sp	0.06	0	0	0	0	0	0	0	0	0	0	0	0	0	0	0	0	1	0	0	0	0	0	0	0	0	0	0	0	0	0	0	0	0	0
8cfa7800091c6026c0979cb3da3b4bc31211009b	#N/A	Metazoa	0.96	Arthropoda	0.88	unclassified_Arthropoda	0.69	unclassified_Arthropoda	0.4	unclassified_Arthropoda	0.23	unclassified_Arthropoda	0.08	unclassified_Arthropoda_sp	0.06	0	0	0	0	0	0	0	0	0	0	0	0	0	0	0	0	0	0	0	1	0	0	0	0	0	0	0	0	0	0	0	0	0	0
13cb5f47f22eed776184f149147ac60de43186de	#N/A	Metazoa	0.85	Arthropoda	0.85	unclassified_Arthropoda	0.54	unclassified_Arthropoda	0.15	unclassified_Arthropoda	0.08	unclassified_Arthropoda	0.08	unclassified_Arthropoda_sp	0.02	0	0	0	0	0	0	0	0	0	0	0	0	0	0	0	0	0	0	0	0	0	0	0	0	0	0	0	0	0	0	1	0	0	0
23690f00431cfcb3b548aa8ed7d9ebca51deb95e	#N/A	Metazoa	0.93	Arthropoda	0.8	unclassified_Arthropoda	0.32	unclassified_Arthropoda	0.09	unclassified_Arthropoda	0.08	unclassified_Arthropoda	0.07	unclassified_Arthropoda_sp	0.07	0	0	0	0	0	0	0	1	0	0	0	0	0	0	0	0	0	0	0	0	0	0	0	0	0	0	0	0	0	0	0	0	0	0
84960c13ece643d38650898ea1ad22024c3c0f83	#N/A	Metazoa	0.99	Arthropoda	0.91	unclassified_Arthropoda	0.73	unclassified_Arthropoda	0.31	unclassified_Arthropoda	0.09	unclassified_Arthropoda	0.07	unclassified_Arthropoda_sp	0.07	0	0	0	0	0	0	0	0	0	0	0	0	0	0	0	0	0	0	0	0	0	0	0	0	0	0	0	0	0	0	0	0	0	0
b918161f3bc4cd87577cc09f94c799b17cffbbf3	#N/A	Metazoa	1	Arthropoda	0.97	unclassified_Arthropoda	0.2	unclassified_Arthropoda	0.15	unclassified_Arthropoda	0.07	unclassified_Arthropoda	0.07	unclassified_Arthropoda_sp	0.07	0	0	0	0	0	0	0	0	0	0	0	0	0	0	0	0	0	0	0	0	0	0	0	0	0	0	0	0	0	0	0	0	0	0
eb569efc6edfb41c07e9f4f8502b4a16338b0071	#N/A	Metazoa	0.99	Arthropoda	0.89	unclassified_Arthropoda	0.19	unclassified_Arthropoda	0.09	unclassified_Arthropoda	0.07	unclassified_Arthropoda	0.07	unclassified_Arthropoda_sp	0.07	0	0	0	0	0	0	0	0	0	0	0	0	0	0	0	0	1	0	0	0	0	0	0	0	0	0	0	0	0	0	0	0	0	0
55e6c75a06fea2f9d48a3d777b1451394b3c0636	#N/A	Metazoa	0.94	Arthropoda	0.88	unclassified_Arthropoda	0.68	unclassified_Arthropoda	0.4	unclassified_Arthropoda	0.08	unclassified_Arthropoda	0.07	unclassified_Arthropoda_sp	0.07	0	0	0	0	0	0	0	0	0	0	0	0	0	0	0	0	0	0	0	0	0	0	0	0	0	0	0	0	0	0	0	1	0	0
7c44da3ba902d16af175d6a0962847779d81f2b1	#N/A	Metazoa	1	Arthropoda	0.97	unclassified_Arthropoda	0.68	unclassified_Arthropoda	0.68	unclassified_Arthropoda	0.28	unclassified_Arthropoda	0.07	unclassified_Arthropoda_sp	0.07	0	0	0	0	0	0	0	0	4	0	2	0	1	0	40	0	2	0	1	0	0	0	0	0	0	0	0	0	0	0	0	0	0	0
7df3324b40599d0efca1c71c12ad6327866ca156	#N/A	Metazoa	0.87	Arthropoda	0.81	unclassified_Arthropoda	0.73	unclassified_Arthropoda	0.31	unclassified_Arthropoda	0.08	unclassified_Arthropoda	0.07	unclassified_Arthropoda_sp	0.04	0	0	0	0	0	0	0	0	0	0	0	0	0	0	0	0	0	0	0	0	0	0	0	0	0	0	0	0	0	0	0	0	0	0
a77a939e68bc4c133f4b2a839737a5b7324a27dd	#N/A	Metazoa	0.98	Arthropoda	0.9	unclassified_Arthropoda	0.74	unclassified_Arthropoda	0.39	unclassified_Arthropoda	0.12	unclassified_Arthropoda	0.07	unclassified_Arthropoda_sp	0.03	0	0	0	0	0	0	0	0	0	0	0	0	0	0	0	0	0	0	0	0	0	0	0	0	0	0	0	0	0	0	0	0	0	0
086361a04a26d7ba0d52f79c535f7e288efc7d0e	#N/A	Metazoa	0.94	Arthropoda	0.81	unclassified_Arthropoda	0.66	unclassified_Arthropoda	0.13	unclassified_Arthropoda	0.11	unclassified_Arthropoda	0.06	unclassified_Arthropoda_sp	0.06	0	0	0	0	0	0	0	0	0	0	1	0	0	0	0	0	0	0	0	0	0	0	0	0	0	0	0	0	0	0	0	0	0	0
334d13541c11d107604337a9f58e417af34815e3	#N/A	Metazoa	0.99	Arthropoda	0.9	unclassified_Arthropoda	0.7	unclassified_Arthropoda	0.06	unclassified_Arthropoda	0.06	unclassified_Arthropoda	0.06	unclassified_Arthropoda_sp	0.06	0	0	0	0	0	0	0	0	0	0	0	1	0	0	0	0	0	0	0	0	0	0	0	0	0	0	0	0	0	0	0	0	0	0
3468d8c21e8c68dc3244213be2a0df71b53e915f	#N/A	Metazoa	1	Arthropoda	0.96	unclassified_Arthropoda	0.39	unclassified_Arthropoda	0.32	unclassified_Arthropoda	0.32	unclassified_Arthropoda	0.06	unclassified_Arthropoda_sp	0.06	0	0	0	0	0	0	0	0	0	0	0	0	0	0	0	0	1	0	0	0	0	0	0	0	0	0	0	0	0	0	0	0	0	0
4b0015d3c850dabcb7e7af7254a9f182b35cfa4c	#N/A	Metazoa	1	Arthropoda	0.96	unclassified_Arthropoda	0.15	unclassified_Arthropoda	0.09	unclassified_Arthropoda	0.06	unclassified_Arthropoda	0.06	unclassified_Arthropoda_sp	0.06	0	0	0	0	0	0	0	0	0	0	0	0	0	0	0	0	0	0	0	0	0	0	0	0	0	0	0	0	0	0	0	0	0	0
697103ff3f13a8fc5969f557f77f4936da22a2b3	#N/A	Metazoa	0.96	Arthropoda	0.82	unclassified_Arthropoda	0.48	unclassified_Arthropoda	0.41	unclassified_Arthropoda	0.16	unclassified_Arthropoda	0.06	unclassified_Arthropoda_sp	0.06	0	0	0	0	0	0	0	1	0	0	0	0	0	0	0	0	0	0	0	0	0	0	0	0	0	0	0	0	0	0	0	0	0	0
839ebb79d82f1b2c8821c4c4b7600d38f09f1831	#N/A	Metazoa	1	Arthropoda	0.95	unclassified_Arthropoda	0.44	unclassified_Arthropoda	0.18	unclassified_Arthropoda	0.06	unclassified_Arthropoda	0.06	unclassified_Arthropoda_sp	0.06	0	0	0	0	0	0	0	0	0	0	0	0	0	0	0	0	0	0	0	0	0	0	0	0	0	0	1	0	0	0	0	0	0	0
978cc3eee3c5055d51963ab0440b058f6b744cbc	#N/A	Metazoa	0.96	Arthropoda	0.82	unclassified_Arthropoda	0.6	unclassified_Arthropoda	0.33	unclassified_Arthropoda	0.06	unclassified_Arthropoda	0.06	unclassified_Arthropoda_sp	0.06	0	0	0	0	0	0	0	0	0	0	0	0	0	0	0	0	0	0	0	0	0	0	0	0	0	0	0	0	0	0	0	1	0	0
995f572618bde894842a5c4b6a41fcd0c430f808	#N/A	Metazoa	0.88	Arthropoda	0.83	unclassified_Arthropoda	0.68	unclassified_Arthropoda	0.35	unclassified_Arthropoda	0.16	unclassified_Arthropoda	0.06	unclassified_Arthropoda_sp	0.06	0	0	0	0	0	0	0	0	0	0	0	0	0	0	0	0	0	0	0	0	0	0	0	0	0	0	0	0	0	0	0	0	0	0
b5228d0bff6db272c2e6f4eb31770f19513268d2	#N/A	Metazoa	0.98	Arthropoda	0.94	unclassified_Arthropoda	0.63	unclassified_Arthropoda	0.56	unclassified_Arthropoda	0.18	unclassified_Arthropoda	0.06	unclassified_Arthropoda_sp	0.06	0	0	0	0	0	0	0	0	0	0	0	0	0	0	0	0	0	0	0	0	0	0	0	0	0	0	0	0	0	1	0	0	0	0
13f00b0982c6d58cbec8d750f734886b743bc4a1	#N/A	Metazoa	1	Arthropoda	0.88	unclassified_Arthropoda	0.3	unclassified_Arthropoda	0.08	unclassified_Arthropoda	0.08	unclassified_Arthropoda	0.06	unclassified_Arthropoda_sp	0.06	0	0	0	0	0	0	0	0	0	0	0	1	0	0	1	0	0	0	0	0	1	0	0	0	0	0	0	0	0	0	0	0	0	0
0182b861006c2ef6729f62ad24ba19bdf43034db	#N/A	Metazoa	1	Arthropoda	0.86	unclassified_Arthropoda	0.32	unclassified_Arthropoda	0.11	unclassified_Arthropoda	0.06	unclassified_Arthropoda	0.06	unclassified_Arthropoda_sp	0.06	0	0	0	0	0	0	0	0	0	0	0	0	0	0	0	0	0	0	0	0	0	0	0	0	0	0	0	0	0	0	0	0	0	0
f21104d36342e6c45e34cc71a70a74fb89da42b2	#N/A	Metazoa	1	Arthropoda	0.84	unclassified_Arthropoda	0.47	unclassified_Arthropoda	0.14	unclassified_Arthropoda	0.06	unclassified_Arthropoda	0.06	unclassified_Arthropoda_sp	0.06	0	0	0	0	0	0	0	0	0	0	0	0	0	2	0	0	0	0	0	0	0	0	4	0	0	0	0	0	0	0	0	0	0	0
9b00ac8cf65a45cf3a6afc101310e9c4a00b73cc	#N/A	Metazoa	0.96	Arthropoda	0.8	unclassified_Arthropoda	0.52	unclassified_Arthropoda	0.12	unclassified_Arthropoda	0.1	unclassified_Arthropoda	0.06	unclassified_Arthropoda_sp	0.05	0	0	0	1	0	0	0	0	0	0	0	0	0	0	0	0	0	0	0	0	0	0	0	0	0	0	0	0	0	0	0	0	0	0
e9b25863259d07870dfae8b19c999142ed2832c8	#N/A	Metazoa	0.99	Arthropoda	0.93	unclassified_Arthropoda	0.72	unclassified_Arthropoda	0.25	unclassified_Arthropoda	0.12	unclassified_Arthropoda	0.06	unclassified_Arthropoda_sp	0.04	0	0	0	0	0	0	0	0	0	0	0	0	0	0	0	0	0	0	0	0	0	0	0	1	0	0	0	0	0	0	0	0	0	0
88d863dd5b142342247619c24b221c2fa1e847ab	#N/A	Metazoa	0.94	Arthropoda	0.82	unclassified_Arthropoda	0.69	unclassified_Arthropoda	0.24	unclassified_Arthropoda	0.06	unclassified_Arthropoda	0.06	unclassified_Arthropoda_sp	0.03	0	0	0	0	0	0	0	0	0	0	0	0	0	0	0	0	0	1	0	0	0	0	0	0	0	0	0	0	0	0	0	0	0	0
ba75a295c327aaca5045f38d0da8a22ec0a57214	#N/A	Metazoa	0.99	Arthropoda	0.8	unclassified_Arthropoda	0.17	unclassified_Arthropoda	0.06	unclassified_Arthropoda	0.06	unclassified_Arthropoda	0.06	unclassified_Arthropoda_sp	0.02	0	0	0	0	0	0	0	0	0	0	0	0	1	0	0	0	0	0	0	0	48	0	0	0	0	0	0	0	0	0	0	0	0	0
107a47e08a54a45fb137db73797598da8df633f9	#N/A	Metazoa	0.89	Arthropoda	0.83	unclassified_Arthropoda	0.62	unclassified_Arthropoda	0.16	unclassified_Arthropoda	0.07	unclassified_Arthropoda	0.06	unclassified_Arthropoda_sp	0.01	0	0	0	0	0	0	0	0	1	4	1	0	0	0	0	0	0	0	0	0	0	0	0	0	0	0	0	0	0	0	1	0	0	0
c69bc68e4c9c5c60ea386d7b65f1c8dd8c8ccf21	#N/A	Metazoa	1	Arthropoda	0.96	unclassified_Arthropoda	0.24	unclassified_Arthropoda	0.07	unclassified_Arthropoda	0.06	unclassified_Arthropoda	0.06	unclassified_Arthropoda_sp	0.01	0	0	0	0	0	0	0	0	0	0	0	0	0	0	0	0	151	0	0	1	0	0	0	0	0	0	0	0	0	0	0	0	0	0
324943cdcd9796e8f293176ba94c93f183b50bca	#N/A	Metazoa	0.97	Arthropoda	0.86	unclassified_Arthropoda	0.67	unclassified_Arthropoda	0.2	unclassified_Arthropoda	0.07	unclassified_Arthropoda	0.05	unclassified_Arthropoda_sp	0.05	0	0	0	0	0	0	0	1	0	0	0	0	0	0	0	0	0	0	0	0	0	0	0	0	0	0	0	0	0	0	0	0	0	0
658afe1a3f7a3c93f13f92dcb8eb1a12dde52f6d	#N/A	Metazoa	0.95	Arthropoda	0.81	unclassified_Arthropoda	0.68	unclassified_Arthropoda	0.29	unclassified_Arthropoda	0.05	unclassified_Arthropoda	0.05	unclassified_Arthropoda_sp	0.05	0	0	0	1	0	0	0	0	0	0	0	0	0	0	0	0	0	0	0	0	0	0	0	0	0	0	0	0	0	0	0	0	0	0
6e260918c5de1de70e4f9b3518b7d3c72fe9b7bd	#N/A	Metazoa	0.9	Arthropoda	0.85	unclassified_Arthropoda	0.55	unclassified_Arthropoda	0.18	unclassified_Arthropoda	0.05	unclassified_Arthropoda	0.05	unclassified_Arthropoda_sp	0.05	0	0	0	0	0	0	0	0	0	0	0	0	0	0	0	0	0	0	0	0	0	0	0	0	0	0	0	0	0	0	1	0	0	0
708243f37d0a86e8fe1066fbbec63d5c9b47cbfa	#N/A	Metazoa	0.99	Arthropoda	0.92	unclassified_Arthropoda	0.75	unclassified_Arthropoda	0.21	unclassified_Arthropoda	0.05	unclassified_Arthropoda	0.05	unclassified_Arthropoda_sp	0.05	0	0	0	0	0	0	0	0	0	0	0	0	0	0	0	1	0	0	0	0	0	0	0	0	0	0	0	0	0	0	0	0	0	0
87e6c238e9e11b359cb5268308c25448f59b7954	#N/A	Metazoa	1	Arthropoda	0.91	unclassified_Arthropoda	0.7	unclassified_Arthropoda	0.22	unclassified_Arthropoda	0.09	unclassified_Arthropoda	0.05	unclassified_Arthropoda_sp	0.05	0	0	0	0	0	0	0	0	0	0	0	0	0	1	0	0	0	0	0	0	0	0	0	0	0	0	0	0	0	0	0	0	0	0
939b889770ce38b61e62ac7245ed82cadc035627	#N/A	Metazoa	1	Arthropoda	0.93	unclassified_Arthropoda	0.77	unclassified_Arthropoda	0.31	unclassified_Arthropoda	0.18	unclassified_Arthropoda	0.05	unclassified_Arthropoda_sp	0.05	0	0	0	0	0	0	0	0	0	0	0	0	0	0	0	0	0	0	0	0	0	0	0	0	0	0	1	0	0	0	0	0	0	0
ec388d7ee49668b6a65f602b88902392d8e1e17e	#N/A	Metazoa	0.99	Arthropoda	0.87	unclassified_Arthropoda	0.56	unclassified_Arthropoda	0.19	unclassified_Arthropoda	0.08	unclassified_Arthropoda	0.05	unclassified_Arthropoda_sp	0.05	0	0	0	0	0	0	0	0	0	0	0	0	0	0	1	0	0	0	0	0	0	0	0	0	0	0	0	0	0	0	0	0	0	0
287bbdb758a206159499e4527e96b43d9ad3186b	#N/A	Metazoa	0.96	Arthropoda	0.81	unclassified_Arthropoda	0.49	unclassified_Arthropoda	0.13	unclassified_Arthropoda	0.08	unclassified_Arthropoda	0.05	unclassified_Arthropoda_sp	0.05	0	0	0	0	0	0	0	0	0	0	0	2	0	0	0	0	0	1	0	1	0	0	0	0	0	0	0	0	0	0	0	0	0	0
21d0533a6c6bef142086a6f56d7b24b1b2ef77ea	#N/A	Metazoa	1	Arthropoda	0.95	unclassified_Arthropoda	0.67	unclassified_Arthropoda	0.59	unclassified_Arthropoda	0.11	unclassified_Arthropoda	0.05	unclassified_Arthropoda_sp	0.05	0	0	0	0	0	0	0	0	0	0	0	0	0	0	0	0	0	0	0	0	0	0	0	0	0	0	0	0	0	0	0	5	0	0
8c40b35d41b92e7e39205c55eb4132b01ba33d61	#N/A	Metazoa	0.97	Arthropoda	0.89	unclassified_Arthropoda	0.75	unclassified_Arthropoda	0.28	unclassified_Arthropoda	0.1	unclassified_Arthropoda	0.05	unclassified_Arthropoda_sp	0.05	0	0	0	0	0	0	0	0	0	0	0	0	0	5	0	0	0	0	0	0	0	0	0	0	0	0	0	0	0	0	0	0	0	0
3b6cf2e412822e345a9ad2d59aaa431b95820429	#N/A	Metazoa	1	Arthropoda	0.94	unclassified_Arthropoda	0.79	unclassified_Arthropoda	0.19	unclassified_Arthropoda	0.06	unclassified_Arthropoda	0.05	unclassified_Arthropoda_sp	0.05	0	0	0	0	0	0	0	0	0	0	0	1	0	0	0	0	0	0	0	0	0	0	0	0	0	0	0	0	0	0	0	0	0	0
edbe9fc018d1903d73aa464808eb712e6f06e503	#N/A	Metazoa	0.89	Arthropoda	0.85	unclassified_Arthropoda	0.72	unclassified_Arthropoda	0.11	unclassified_Arthropoda	0.05	unclassified_Arthropoda	0.05	unclassified_Arthropoda_sp	0.05	0	0	0	0	0	0	0	0	0	0	1	0	0	0	0	0	2	0	0	0	0	0	0	0	0	0	0	0	0	0	0	0	0	0
488994c9b31fa83bdfffd3f1c4d220a1a9e8189a	#N/A	Metazoa	0.93	Arthropoda	0.8	unclassified_Arthropoda	0.58	unclassified_Arthropoda	0.11	unclassified_Arthropoda	0.05	unclassified_Arthropoda	0.05	unclassified_Arthropoda_sp	0.05	0	0	0	0	0	0	0	0	1	0	0	1	0	0	0	2	0	0	0	0	1	1	0	0	0	0	0	0	0	0	0	0	0	0
0764879c44aaa57675fb7e1b2dfdb7795e4a548f	#N/A	Metazoa	1	Arthropoda	0.94	unclassified_Arthropoda	0.71	unclassified_Arthropoda	0.41	unclassified_Arthropoda	0.13	unclassified_Arthropoda	0.05	unclassified_Arthropoda_sp	0.04	0	0	0	0	0	0	0	0	0	0	0	0	0	0	0	0	0	0	0	0	0	0	0	0	0	0	0	0	0	1	0	0	0	0
cd2363dfbdc714fd292c18cfd9ae3b12f2d1c8d4	#N/A	Metazoa	0.98	Arthropoda	0.93	unclassified_Arthropoda	0.59	unclassified_Arthropoda	0.42	unclassified_Arthropoda	0.1	unclassified_Arthropoda	0.05	unclassified_Arthropoda_sp	0.04	0	1	0	0	0	0	0	0	0	0	0	0	0	0	0	0	0	0	0	0	0	0	0	0	0	0	0	0	0	0	0	0	0	0
e701d28190b35d5d8038957fc24bf4f1aa3da5cb	#N/A	Metazoa	1	Arthropoda	0.85	unclassified_Arthropoda	0.28	unclassified_Arthropoda	0.26	unclassified_Arthropoda	0.12	unclassified_Arthropoda	0.05	unclassified_Arthropoda_sp	0.04	0	0	0	0	0	0	0	0	0	0	0	0	0	0	0	0	0	0	0	0	0	0	0	0	0	0	0	0	0	1	0	0	0	0
9ed17c85f179f0ba49d34b2fed5eb4e5a5049c74	#N/A	Metazoa	1	Arthropoda	0.98	unclassified_Arthropoda	0.67	unclassified_Arthropoda	0.23	unclassified_Arthropoda	0.11	unclassified_Arthropoda	0.05	unclassified_Arthropoda_sp	0.04	0	0	0	0	0	0	0	0	0	0	0	0	0	0	0	0	0	0	0	0	0	0	0	0	0	2	0	0	0	0	0	0	0	0
ac81869c7e33529279e32f065bfcf3b9e415674d	#N/A	Metazoa	0.96	Arthropoda	0.86	unclassified_Arthropoda	0.55	unclassified_Arthropoda	0.47	unclassified_Arthropoda	0.07	unclassified_Arthropoda	0.05	unclassified_Arthropoda_sp	0.03	0	0	0	0	0	0	0	0	0	0	0	0	0	1	0	0	0	0	0	0	0	0	0	0	0	0	0	0	0	0	0	0	0	0
b57d2c15f8737a1f8019507fbddf60cde6aa5b93	#N/A	Metazoa	0.98	Arthropoda	0.89	unclassified_Arthropoda	0.73	unclassified_Arthropoda	0.19	unclassified_Arthropoda	0.09	unclassified_Arthropoda	0.05	unclassified_Arthropoda_sp	0.01	0	0	0	0	0	0	0	2	0	0	0	0	0	0	0	0	0	0	0	0	0	0	0	0	0	0	0	0	0	0	0	0	0	0
00f6b8a1937df4187df4c0fff3ec8a25f5891cfd	#N/A	Metazoa	1	Arthropoda	0.99	unclassified_Arthropoda	0.66	unclassified_Arthropoda	0.22	unclassified_Arthropoda	0.09	unclassified_Arthropoda	0.04	unclassified_Arthropoda_sp	0.04	0	0	0	0	0	0	0	0	0	0	0	0	0	0	0	0	0	0	0	0	0	0	0	0	0	0	0	1	0	0	0	0	0	0
0cbd5502c14d23a46578d264f6855d0879329a72	#N/A	Metazoa	0.99	Arthropoda	0.86	unclassified_Arthropoda	0.63	unclassified_Arthropoda	0.56	unclassified_Arthropoda	0.15	unclassified_Arthropoda	0.04	unclassified_Arthropoda_sp	0.04	0	0	0	0	0	0	0	0	0	0	0	0	0	0	0	0	0	0	0	0	0	0	0	0	0	0	0	0	0	0	0	0	0	0
0ebbaa31a3ff69c8aad7d55da3a55d7f9d3aab86	#N/A	Metazoa	0.89	Arthropoda	0.86	unclassified_Arthropoda	0.35	unclassified_Arthropoda	0.32	unclassified_Arthropoda	0.13	unclassified_Arthropoda	0.04	unclassified_Arthropoda_sp	0.04	0	0	0	0	0	0	0	0	0	0	0	0	0	0	0	0	0	0	0	0	0	0	0	0	0	0	0	0	0	0	0	0	0	0
39e33c2317e405cf50f164a626f035ea2764d4a6	#N/A	Metazoa	0.96	Arthropoda	0.86	unclassified_Arthropoda	0.62	unclassified_Arthropoda	0.22	unclassified_Arthropoda	0.12	unclassified_Arthropoda	0.04	unclassified_Arthropoda_sp	0.04	0	0	0	0	0	0	0	0	0	0	0	0	0	0	0	0	0	0	0	0	0	0	0	0	0	0	0	0	0	0	0	0	0	0
d15584ad2d41778dc00abc89af9d88d13956b77e	#N/A	Metazoa	0.92	Arthropoda	0.81	unclassified_Arthropoda	0.19	unclassified_Arthropoda	0.13	unclassified_Arthropoda	0.04	unclassified_Arthropoda	0.04	unclassified_Arthropoda_sp	0.04	0	0	0	0	0	0	0	0	0	0	0	0	0	0	0	0	0	1	0	0	0	0	0	0	0	0	0	0	0	0	0	0	0	0
57cb8c5b21da3ff6afad45b5295894fcefb12778	#N/A	Metazoa	0.97	Arthropoda	0.88	unclassified_Arthropoda	0.39	unclassified_Arthropoda	0.16	unclassified_Arthropoda	0.07	unclassified_Arthropoda	0.04	unclassified_Arthropoda_sp	0.04	0	0	0	0	0	0	0	0	0	0	0	0	0	0	0	0	0	0	0	0	0	0	0	0	0	0	2	1	0	0	0	0	0	0
1845730a4ecec36e6ddd8c402de9ffcce47197d6	#N/A	Metazoa	1	Arthropoda	0.95	unclassified_Arthropoda	0.77	unclassified_Arthropoda	0.35	unclassified_Arthropoda	0.06	unclassified_Arthropoda	0.04	unclassified_Arthropoda_sp	0.04	0	2	0	0	0	0	1	0	0	1	0	0	0	0	0	0	0	0	1	0	0	0	0	0	0	0	0	0	0	0	0	0	1	0
ad1ac137b4121e7b30bd102cdfae0def518fb345	#N/A	Metazoa	0.99	Arthropoda	0.94	unclassified_Arthropoda	0.44	unclassified_Arthropoda	0.11	unclassified_Arthropoda	0.05	unclassified_Arthropoda	0.04	unclassified_Arthropoda_sp	0.04	0	0	0	0	0	0	0	0	0	0	0	0	0	0	0	0	0	1	0	0	0	0	0	0	0	0	0	0	0	0	0	0	0	0
0452044da041ff5e01295f7b3002b9b5a0cb7aba	#N/A	Metazoa	0.99	Arthropoda	0.91	unclassified_Arthropoda	0.25	unclassified_Arthropoda	0.23	unclassified_Arthropoda	0.09	unclassified_Arthropoda	0.04	unclassified_Arthropoda_sp	0.04	0	0	0	0	0	0	0	0	0	0	0	0	0	0	0	0	0	0	0	0	0	0	0	0	0	0	0	0	0	0	0	0	0	0
329a9146d44ff8e1a7aadd4d65022f8afc8a85dc	#N/A	Metazoa	1	Arthropoda	0.93	unclassified_Arthropoda	0.78	unclassified_Arthropoda	0.24	unclassified_Arthropoda	0.15	unclassified_Arthropoda	0.04	unclassified_Arthropoda_sp	0.03	0	0	0	0	0	0	0	0	0	0	0	0	0	0	0	0	0	0	0	0	0	0	0	0	0	0	0	0	0	0	0	0	0	0
cb9687e0d08c0f7ba3c1069aa020736c7f2f2054	#N/A	Metazoa	0.89	Arthropoda	0.83	unclassified_Arthropoda	0.27	unclassified_Arthropoda	0.1	unclassified_Arthropoda	0.04	unclassified_Arthropoda	0.04	unclassified_Arthropoda_sp	0.03	0	0	0	0	0	0	0	0	0	0	0	0	0	0	0	1	0	0	0	0	0	0	0	0	0	0	0	0	0	0	0	0	0	0
749f26918af1c9edb1e141933b721459413cea73	#N/A	Metazoa	0.89	Arthropoda	0.8	unclassified_Arthropoda	0.78	unclassified_Arthropoda	0.52	unclassified_Arthropoda	0.11	unclassified_Arthropoda	0.04	unclassified_Arthropoda_sp	0.03	0	0	0	0	0	0	0	0	0	0	0	0	0	0	0	0	0	0	0	0	0	0	0	0	0	0	0	0	0	0	0	0	0	0
063d3a4b9dbac33a89fb7fe951f73b64fbbc4971	#N/A	Metazoa	1	Arthropoda	0.93	unclassified_Arthropoda	0.72	unclassified_Arthropoda	0.1	unclassified_Arthropoda	0.05	unclassified_Arthropoda	0.03	unclassified_Arthropoda_sp	0.03	0	0	0	0	0	0	0	0	0	0	0	0	0	0	0	0	0	0	0	0	0	0	0	0	0	0	0	1	0	0	0	0	0	0
2d07999916640578e9a95a1c186a9bdbb98bd5e8	#N/A	Metazoa	0.91	Arthropoda	0.86	unclassified_Arthropoda	0.53	unclassified_Arthropoda	0.07	unclassified_Arthropoda	0.03	unclassified_Arthropoda	0.03	unclassified_Arthropoda_sp	0.03	0	0	0	0	0	0	0	0	0	0	0	0	0	0	0	0	0	0	0	0	0	0	1	0	0	0	0	0	0	0	0	0	0	0
401428e09473538e0433a0d9387b41d546458baa	#N/A	Metazoa	1	Arthropoda	0.94	unclassified_Arthropoda	0.68	unclassified_Arthropoda	0.2	unclassified_Arthropoda	0.05	unclassified_Arthropoda	0.03	unclassified_Arthropoda_sp	0.03	0	0	0	0	0	0	0	0	0	0	0	0	0	0	0	0	0	0	0	0	0	0	0	0	0	0	0	0	0	0	0	0	0	0
41e75598e023b47d5f8835689d88df712c3d155d	#N/A	Metazoa	0.93	Arthropoda	0.86	unclassified_Arthropoda	0.19	unclassified_Arthropoda	0.05	unclassified_Arthropoda	0.03	unclassified_Arthropoda	0.03	unclassified_Arthropoda_sp	0.03	0	0	0	0	0	0	0	0	0	0	0	0	0	0	0	0	0	0	0	0	0	0	0	0	0	0	0	0	0	1	0	0	0	0
4ea90af27bc817d33301a0dcf933bad04c4fc63b	#N/A	Metazoa	0.99	Arthropoda	0.93	unclassified_Arthropoda	0.72	unclassified_Arthropoda	0.27	unclassified_Arthropoda	0.03	unclassified_Arthropoda	0.03	unclassified_Arthropoda_sp	0.03	0	0	0	0	0	0	0	0	0	0	0	0	0	0	0	0	0	0	0	0	0	0	0	0	0	0	0	0	0	0	0	0	0	0
6b137fbeecc1fdec7a0a2402b21b4b676eab30a4	#N/A	Metazoa	1	Arthropoda	1	unclassified_Arthropoda	0.75	unclassified_Arthropoda	0.29	unclassified_Arthropoda	0.04	unclassified_Arthropoda	0.03	unclassified_Arthropoda_sp	0.03	0	0	0	0	0	0	0	0	0	0	0	0	0	0	0	0	0	0	0	0	0	0	0	0	0	0	0	0	0	1	0	0	0	0
a4214f7b2669f8737e030f383893dac3532e355b	#N/A	Metazoa	1	Arthropoda	0.98	unclassified_Arthropoda	0.7	unclassified_Arthropoda	0.38	unclassified_Arthropoda	0.04	unclassified_Arthropoda	0.03	unclassified_Arthropoda_sp	0.03	0	0	0	0	0	0	0	0	0	0	0	0	0	0	0	0	0	0	0	0	0	0	0	0	0	0	0	0	0	0	0	0	0	0
e4e04ee53e9b7cfaa1dc861be82f938029d2a92d	#N/A	Metazoa	0.99	Arthropoda	0.98	unclassified_Arthropoda	0.74	unclassified_Arthropoda	0.21	unclassified_Arthropoda	0.06	unclassified_Arthropoda	0.03	unclassified_Arthropoda_sp	0.03	0	0	0	0	0	0	0	0	0	0	0	0	0	0	1	0	0	0	0	0	0	0	0	0	0	0	0	0	0	0	0	0	0	0
f025989f23141c42c419a1564facb70bb5460b4a	#N/A	Metazoa	0.99	Arthropoda	0.84	unclassified_Arthropoda	0.51	unclassified_Arthropoda	0.16	unclassified_Arthropoda	0.03	unclassified_Arthropoda	0.03	unclassified_Arthropoda_sp	0.03	0	0	0	0	0	0	0	0	0	0	0	1	0	0	0	0	0	0	0	0	0	0	0	0	0	0	0	0	0	0	0	0	0	0
f79e979d42a92c60af42a369075de279d58edd4d	#N/A	Metazoa	1	Arthropoda	0.92	unclassified_Arthropoda	0.64	unclassified_Arthropoda	0.06	unclassified_Arthropoda	0.04	unclassified_Arthropoda	0.03	unclassified_Arthropoda_sp	0.03	0	1	0	0	0	0	0	0	0	0	0	0	0	0	0	0	0	0	0	0	0	0	0	0	0	0	0	0	0	0	0	0	0	0
36002f63ad333d8d05ee6f99cceb312df615e0fb	#N/A	Metazoa	0.9	Arthropoda	0.8	unclassified_Arthropoda	0.63	unclassified_Arthropoda	0.38	unclassified_Arthropoda	0.12	unclassified_Arthropoda	0.03	unclassified_Arthropoda_sp	0.03	0	0	0	0	0	0	0	0	0	0	0	0	0	0	0	0	0	0	0	0	0	0	0	0	0	0	0	0	0	0	0	0	0	0
8324147928f7c47715fae6b65b667efb1311dccb	#N/A	Metazoa	1	Arthropoda	0.91	unclassified_Arthropoda	0.51	unclassified_Arthropoda	0.47	unclassified_Arthropoda	0.18	unclassified_Arthropoda	0.03	unclassified_Arthropoda_sp	0.02	1	0	0	0	0	0	0	0	0	0	0	0	0	0	0	0	0	0	0	0	0	0	0	0	0	0	0	0	0	0	0	0	0	0
75f4b5f0a83ea7ebc8862eee5ffce744a3326b7d	#N/A	Metazoa	0.91	Arthropoda	0.81	unclassified_Arthropoda	0.55	unclassified_Arthropoda	0.3	unclassified_Arthropoda	0.08	unclassified_Arthropoda	0.03	unclassified_Arthropoda_sp	0.02	0	0	0	0	0	0	0	0	0	0	0	0	0	0	0	0	0	0	0	1	0	0	0	0	0	0	0	0	0	0	0	0	0	0
d9960ee985bc0da66d518239f1ea7d9375833349	#N/A	Metazoa	1	Arthropoda	0.82	unclassified_Arthropoda	0.13	unclassified_Arthropoda	0.03	unclassified_Arthropoda	0.03	unclassified_Arthropoda	0.03	unclassified_Arthropoda_sp	0.02	0	0	0	0	0	0	0	0	0	0	0	4	0	0	0	0	1	1	0	1	10	0	10	0	0	0	0	0	0	0	0	0	0	0
0d881d1875bd7cc6f7cc8e8daacea5b153933939	#N/A	Metazoa	0.97	Arthropoda	0.8	unclassified_Arthropoda	0.49	unclassified_Arthropoda	0.13	unclassified_Arthropoda	0.04	unclassified_Arthropoda	0.03	unclassified_Arthropoda_sp	0.01	0	0	0	0	0	0	0	0	0	0	0	0	0	0	0	0	1	0	0	0	0	0	0	0	0	0	0	0	0	0	0	0	0	0
55bc44530a030beb36c0e3c04212319e7936f2fa	#N/A	Metazoa	1	Arthropoda	0.9	unclassified_Arthropoda	0.68	unclassified_Arthropoda	0.29	unclassified_Arthropoda	0.06	unclassified_Arthropoda	0.03	unclassified_Arthropoda_sp	0.01	0	0	0	0	0	0	0	0	0	0	0	0	0	0	0	0	0	0	0	0	0	0	0	38	0	0	0	0	0	0	0	0	0	0
012e8bf1458752c97bff7c931c543c49db058682	#N/A	Metazoa	1	Arthropoda	0.98	unclassified_Arthropoda	0.58	unclassified_Arthropoda	0.14	unclassified_Arthropoda	0.02	unclassified_Arthropoda	0.02	unclassified_Arthropoda_sp	0.02	0	0	0	0	0	0	0	0	0	0	0	0	0	0	0	0	0	0	0	0	0	1	0	0	0	0	0	0	0	0	0	0	0	0
111d7f7387079b66ea7a2969204ba57775c6e04d	#N/A	Metazoa	0.98	Arthropoda	0.86	unclassified_Arthropoda	0.46	unclassified_Arthropoda	0.16	unclassified_Arthropoda	0.09	unclassified_Arthropoda	0.02	unclassified_Arthropoda_sp	0.02	0	0	0	0	0	0	0	0	0	0	0	0	0	0	0	0	0	0	0	0	0	0	0	0	0	0	0	0	0	0	0	0	0	0
123a8e48b9714c064d28cbdc9fc12eca2a7dd6c7	#N/A	Metazoa	0.96	Arthropoda	0.93	unclassified_Arthropoda	0.55	unclassified_Arthropoda	0.23	unclassified_Arthropoda	0.15	unclassified_Arthropoda	0.02	unclassified_Arthropoda_sp	0.02	0	0	0	0	0	0	0	0	0	0	0	0	0	0	0	0	0	0	0	0	0	0	0	0	0	0	0	0	0	0	0	0	0	0
51ec8c9f46075d46609bb647d7c59b348b17c564	#N/A	Metazoa	0.99	Arthropoda	0.84	unclassified_Arthropoda	0.62	unclassified_Arthropoda	0.02	unclassified_Arthropoda	0.02	unclassified_Arthropoda	0.02	unclassified_Arthropoda_sp	0.02	0	0	0	0	0	0	0	0	0	0	0	0	0	0	0	0	0	0	0	0	0	0	0	0	0	0	0	0	0	0	0	0	0	0
6065dead4dfb9140586143cc690b121bc3da0ec4	#N/A	Metazoa	0.94	Arthropoda	0.82	unclassified_Arthropoda	0.61	unclassified_Arthropoda	0.17	unclassified_Arthropoda	0.02	unclassified_Arthropoda	0.02	unclassified_Arthropoda_sp	0.02	0	0	0	0	0	0	0	0	0	0	0	0	0	0	0	0	0	0	0	0	0	0	0	0	0	0	0	0	0	0	0	0	0	0
6a53accda1e3bae43dcf7e7d3a0ee4dacbc01bfc	#N/A	Metazoa	0.99	Arthropoda	0.88	unclassified_Arthropoda	0.52	unclassified_Arthropoda	0.1	unclassified_Arthropoda	0.02	unclassified_Arthropoda	0.02	unclassified_Arthropoda_sp	0.02	0	0	0	0	0	0	0	0	0	0	0	0	0	0	0	0	1	0	0	0	0	0	0	0	0	0	0	0	0	0	0	0	0	0
75f14b91f2eab413be8896030101123371ce7a21	#N/A	Metazoa	0.98	Arthropoda	0.9	unclassified_Arthropoda	0.38	unclassified_Arthropoda	0.19	unclassified_Arthropoda	0.02	unclassified_Arthropoda	0.02	unclassified_Arthropoda_sp	0.02	0	0	0	0	0	0	0	0	0	0	0	0	0	0	0	0	0	1	0	0	0	0	0	0	0	0	0	0	0	0	0	0	0	0
7779ec742bb3aa9584a9d887e03b260898590c13	#N/A	Metazoa	0.99	Arthropoda	0.97	unclassified_Arthropoda	0.64	unclassified_Arthropoda	0.19	unclassified_Arthropoda	0.06	unclassified_Arthropoda	0.02	unclassified_Arthropoda_sp	0.02	0	0	0	0	0	0	0	0	0	0	0	0	0	0	0	0	0	0	0	0	0	0	0	0	0	0	1	0	0	0	0	0	0	0
79ebaeed04d283ac599ba6cdbd0bc26ab3a2956c	#N/A	Metazoa	0.89	Arthropoda	0.84	unclassified_Arthropoda	0.59	unclassified_Arthropoda	0.08	unclassified_Arthropoda	0.02	unclassified_Arthropoda	0.02	unclassified_Arthropoda_sp	0.02	0	0	0	0	0	0	1	0	0	0	0	0	0	0	0	0	0	0	0	0	0	0	0	0	0	0	0	0	0	0	0	0	0	0
c941121a58503ed60575858ab8189c835565638a	#N/A	Metazoa	0.98	Arthropoda	0.84	unclassified_Arthropoda	0.56	unclassified_Arthropoda	0.14	unclassified_Arthropoda	0.02	unclassified_Arthropoda	0.02	unclassified_Arthropoda_sp	0.02	0	0	0	0	0	0	0	0	0	0	0	0	0	0	0	0	0	0	0	0	0	0	0	0	0	0	0	0	0	1	0	0	0	0
260dd653bafc355c5cdec453872d423d98b5b57b	#N/A	Metazoa	0.95	Arthropoda	0.92	unclassified_Arthropoda	0.78	unclassified_Arthropoda	0.06	unclassified_Arthropoda	0.05	unclassified_Arthropoda	0.02	unclassified_Arthropoda_sp	0.02	0	0	0	0	0	0	0	0	0	0	0	0	0	0	0	0	0	0	0	0	0	0	0	0	0	0	0	0	2	0	0	0	0	0
a1aa41f04ffb5a830766f10a199b26a20c600b37	#N/A	Metazoa	0.98	Arthropoda	0.81	unclassified_Arthropoda	0.57	unclassified_Arthropoda	0.1	unclassified_Arthropoda	0.02	unclassified_Arthropoda	0.02	unclassified_Arthropoda_sp	0.02	0	0	0	0	0	0	3	0	0	0	0	0	0	0	0	0	0	0	0	0	0	0	0	0	0	0	0	0	0	0	0	0	0	0
86a2f8cd97ab15626bfacc69c41b34ec20b02747	#N/A	Metazoa	1	Arthropoda	0.99	unclassified_Arthropoda	0.68	unclassified_Arthropoda	0.05	unclassified_Arthropoda	0.03	unclassified_Arthropoda	0.02	unclassified_Arthropoda_sp	0.02	0	0	0	0	0	0	0	0	0	0	0	0	0	0	0	0	0	1	0	0	0	0	0	0	0	0	0	0	0	0	0	0	0	0
9e849ac5cc47faab0113c0d64548dcaa90d20360	#N/A	Metazoa	1	Arthropoda	0.96	unclassified_Arthropoda	0.56	unclassified_Arthropoda	0.21	unclassified_Arthropoda	0.04	unclassified_Arthropoda	0.02	unclassified_Arthropoda_sp	0.02	0	0	0	1	0	0	0	0	1	0	0	0	0	0	0	1	0	0	0	0	0	0	0	0	0	0	0	0	0	0	0	0	0	0
dcef88ba5de0daeda72d0bac17bf8404b217163a	#N/A	Metazoa	0.98	Arthropoda	0.92	unclassified_Arthropoda	0.74	unclassified_Arthropoda	0.05	unclassified_Arthropoda	0.03	unclassified_Arthropoda	0.02	unclassified_Arthropoda_sp	0.02	0	0	0	0	0	0	0	0	0	0	0	0	0	0	0	0	0	0	0	0	0	0	0	0	0	0	0	0	0	0	0	0	0	0
630bbff76422559939948e427e3378d0b1d91afe	#N/A	Metazoa	1	Arthropoda	0.98	unclassified_Arthropoda	0.64	unclassified_Arthropoda	0.34	unclassified_Arthropoda	0.11	unclassified_Arthropoda	0.02	unclassified_Arthropoda_sp	0.02	0	0	0	0	0	0	0	0	0	0	0	0	0	0	0	11	0	0	0	0	0	0	0	0	0	0	0	0	0	0	0	0	0	0
247abb315418ac632e7b5d688d3b4e2d803c601a	#N/A	Metazoa	1	Arthropoda	0.96	unclassified_Arthropoda	0.79	unclassified_Arthropoda	0.3	unclassified_Arthropoda	0.18	unclassified_Arthropoda	0.02	unclassified_Arthropoda_sp	0.02	0	0	0	0	0	0	0	0	0	0	0	0	0	0	0	5	0	0	0	0	0	0	0	1	0	0	0	0	0	0	0	0	0	0
38d87422c259470f6e1d37a5bd11f3ca48d4a9d0	#N/A	Metazoa	0.89	Arthropoda	0.82	unclassified_Arthropoda	0.58	unclassified_Arthropoda	0.42	unclassified_Arthropoda	0.16	unclassified_Arthropoda	0.02	unclassified_Arthropoda_sp	0.01	0	0	0	0	0	0	0	0	0	0	0	0	0	0	0	0	0	0	0	0	0	0	0	0	0	0	0	0	0	0	0	0	0	0
a00f48a5541756c158b1b5ae42b30194c7e2a49e	#N/A	Metazoa	0.93	Arthropoda	0.92	unclassified_Arthropoda	0.44	unclassified_Arthropoda	0.41	unclassified_Arthropoda	0.08	unclassified_Arthropoda	0.02	unclassified_Arthropoda_sp	0.01	0	0	0	0	0	0	0	0	0	0	0	0	0	0	0	0	0	0	0	0	0	0	0	0	0	0	0	0	0	0	0	0	0	0
a79f2fea55a7314a3c12bc2a52044603ca0f1194	#N/A	Metazoa	0.87	Arthropoda	0.81	unclassified_Arthropoda	0.43	unclassified_Arthropoda	0.27	unclassified_Arthropoda	0.1	unclassified_Arthropoda	0.02	unclassified_Arthropoda_sp	0.01	0	0	0	0	0	0	0	0	0	0	0	0	0	0	0	0	0	0	0	0	0	0	0	0	0	0	0	0	0	0	0	0	0	0
e75e30b7e50053d9347c58dd543bf2cc3a41cd9b	#N/A	Metazoa	0.97	Arthropoda	0.92	unclassified_Arthropoda	0.45	unclassified_Arthropoda	0.04	unclassified_Arthropoda	0.02	unclassified_Arthropoda	0.02	unclassified_Arthropoda_sp	0.01	1	0	0	0	0	0	0	0	0	0	0	0	0	0	0	0	0	0	0	0	0	0	0	0	0	0	0	0	0	0	0	0	0	0
fb78bd5a6f4d81d2009ac7ca64c197aac4ff7120	#N/A	Metazoa	0.98	Arthropoda	0.88	unclassified_Arthropoda	0.73	unclassified_Arthropoda	0.13	unclassified_Arthropoda	0.05	unclassified_Arthropoda	0.02	unclassified_Arthropoda_sp	0	0	0	0	0	0	0	0	0	0	0	0	0	0	0	0	0	0	0	0	0	0	0	0	0	0	0	0	0	0	0	0	0	0	0
037813a441c86c2a0de651e10a8d4d86f73a938c	#N/A	Metazoa	0.99	Arthropoda	0.82	unclassified_Arthropoda	0.51	unclassified_Arthropoda	0.2	unclassified_Arthropoda	0.05	unclassified_Arthropoda	0.02	unclassified_Arthropoda_sp	0	0	0	2	0	0	0	0	0	0	0	0	0	0	0	0	0	0	0	0	2	0	0	0	0	0	0	0	0	0	0	0	1	0	0
00dd355b2da39dd6b3fddb79dc96b829deaf22b9	#N/A	Metazoa	1	Arthropoda	0.96	unclassified_Arthropoda	0.74	unclassified_Arthropoda	0.1	unclassified_Arthropoda	0.03	unclassified_Arthropoda	0.02	unclassified_Arthropoda_sp	0	0	0	0	0	0	0	0	0	0	0	1	0	0	0	0	0	0	0	0	0	0	0	0	0	0	0	0	0	0	0	0	0	0	0
0a89a6c1822e24ddc8c524a313acdc5143fda7dd	#N/A	Metazoa	0.88	Arthropoda	0.82	unclassified_Arthropoda	0.49	unclassified_Arthropoda	0.21	unclassified_Arthropoda	0.01	unclassified_Arthropoda	0.01	unclassified_Arthropoda_sp	0.01	0	0	0	0	0	0	0	0	0	0	0	0	0	0	0	0	0	0	0	0	0	0	0	0	0	0	0	0	0	0	0	0	0	0
7db1964a9a9c54c513accb638209470f84e42177	#N/A	Metazoa	1	Arthropoda	0.86	unclassified_Arthropoda	0.71	unclassified_Arthropoda	0.26	unclassified_Arthropoda	0.01	unclassified_Arthropoda	0.01	unclassified_Arthropoda_sp	0.01	0	0	0	0	0	0	0	0	0	0	0	0	0	0	0	0	0	0	0	1	0	0	0	0	0	0	0	0	0	0	0	0	0	0
9e6aea46ccf9fcc062bbf50f0df6d5fd7bcc4366	#N/A	Metazoa	1	Arthropoda	0.92	unclassified_Arthropoda	0.56	unclassified_Arthropoda	0.14	unclassified_Arthropoda	0.07	unclassified_Arthropoda	0.01	unclassified_Arthropoda_sp	0.01	0	0	0	0	0	0	1	0	0	0	0	0	0	0	0	0	0	0	0	0	0	0	0	0	0	0	0	0	0	0	0	0	0	0
a1be366812e37207eae2e9789b26dcc6752601dd	#N/A	Metazoa	1	Arthropoda	0.94	unclassified_Arthropoda	0.23	unclassified_Arthropoda	0.2	unclassified_Arthropoda	0.19	unclassified_Arthropoda	0.01	unclassified_Arthropoda_sp	0.01	0	0	0	0	0	0	0	0	0	0	0	0	0	0	0	0	1	0	0	0	0	0	0	0	0	0	0	0	0	0	0	0	0	0
deecd3a31ae74ddcdb5684f50725ee72fb31ed85	#N/A	Metazoa	1	Arthropoda	0.92	unclassified_Arthropoda	0.74	unclassified_Arthropoda	0.22	unclassified_Arthropoda	0.13	unclassified_Arthropoda	0.01	unclassified_Arthropoda_sp	0.01	0	0	0	1	0	0	0	0	0	0	0	0	0	0	0	0	0	0	0	0	0	0	0	0	0	0	0	0	0	0	0	0	0	0
f651ece210bcdfe66ef5c2d1473c45405ade443f	#N/A	Metazoa	0.96	Arthropoda	0.8	unclassified_Arthropoda	0.48	unclassified_Arthropoda	0.06	unclassified_Arthropoda	0.02	unclassified_Arthropoda	0.01	unclassified_Arthropoda_sp	0.01	0	0	0	0	0	1	0	0	0	0	0	0	0	0	0	0	0	0	0	0	0	0	0	0	0	0	0	0	0	0	0	0	0	0
12917228c27c4a04af75e0d568a5fa5908ba8f13	#N/A	Metazoa	0.94	Arthropoda	0.84	unclassified_Arthropoda	0.48	unclassified_Arthropoda	0.07	unclassified_Arthropoda	0.01	unclassified_Arthropoda	0.01	unclassified_Arthropoda_sp	0.01	0	0	0	0	0	0	0	0	0	0	0	0	1	0	0	0	0	0	0	0	1	0	0	0	0	0	0	0	0	0	0	0	0	0
1802e47e7a6a788b9b8668e2e0f7f1d044b70014	#N/A	Metazoa	1	Arthropoda	0.93	unclassified_Arthropoda	0.71	unclassified_Arthropoda	0.18	unclassified_Arthropoda	0.01	unclassified_Arthropoda	0.01	unclassified_Arthropoda_sp	0.01	0	0	0	0	0	0	0	0	0	0	0	0	0	0	0	0	0	0	0	0	0	0	0	0	0	0	0	0	0	0	0	2	0	0
c5b73984e89150c27c777a54cb1fa1294415aa94	#N/A	Metazoa	1	Arthropoda	0.89	unclassified_Arthropoda	0.31	unclassified_Arthropoda	0.02	unclassified_Arthropoda	0.01	unclassified_Arthropoda	0.01	unclassified_Arthropoda_sp	0.01	0	0	0	0	0	0	0	0	3	0	0	0	0	0	0	0	0	0	0	0	0	0	0	0	0	0	0	0	0	0	0	0	0	0
53dc4db568c3ba9f181778974bc70de658c91e34	#N/A	Metazoa	1	Arthropoda	0.97	unclassified_Arthropoda	0.74	unclassified_Arthropoda	0.27	unclassified_Arthropoda	0.01	unclassified_Arthropoda	0.01	unclassified_Arthropoda_sp	0.01	0	0	0	0	0	0	0	0	0	0	0	0	0	0	0	0	0	0	0	0	0	0	0	0	0	0	0	0	0	0	0	0	0	1
6465e51b5d3dbb4c26b55af5b3f566d18613ab10	#N/A	Metazoa	0.96	Arthropoda	0.9	unclassified_Arthropoda	0.75	unclassified_Arthropoda	0.04	unclassified_Arthropoda	0.01	unclassified_Arthropoda	0.01	unclassified_Arthropoda_sp	0.01	0	0	0	0	0	0	0	0	0	0	0	10	0	4	0	0	0	0	0	0	0	0	0	0	0	0	0	0	0	0	0	0	0	0
2e1d94c126a87b81009b732ef4abc2f64caa9d84	#N/A	Metazoa	1	Arthropoda	0.94	unclassified_Arthropoda	0.53	unclassified_Arthropoda	0.17	unclassified_Arthropoda	0.01	unclassified_Arthropoda	0.01	unclassified_Arthropoda_sp	0.01	0	0	0	0	0	0	0	0	0	0	0	0	0	0	0	0	0	0	0	0	0	0	0	0	70	0	0	0	0	0	0	0	0	0
e0c59efbdfd2a3a0c1b2d1e6670435de0d034795	#N/A	Metazoa	0.99	Arthropoda	0.94	unclassified_Arthropoda	0.53	unclassified_Arthropoda	0.16	unclassified_Arthropoda	0.01	unclassified_Arthropoda	0.01	unclassified_Arthropoda_sp	0.01	0	0	0	0	0	0	0	0	1	0	0	0	0	0	0	1	8	0	1	0	0	0	0	0	0	0	0	0	0	0	0	0	0	0
116eaafac21a586f87a5e782074d9673d35144f2	#N/A	Metazoa	0.98	Arthropoda	0.95	unclassified_Arthropoda	0.61	unclassified_Arthropoda	0.16	unclassified_Arthropoda	0.01	unclassified_Arthropoda	0	unclassified_Arthropoda_sp	0	0	0	0	0	0	0	0	0	0	0	0	0	0	0	0	0	0	0	0	0	0	0	0	0	0	0	0	0	0	0	0	0	0	0
4808889a2ec9cc4c0581a9ea7fd8f1630567268f	#N/A	Metazoa	0.96	Arthropoda	0.89	unclassified_Arthropoda	0.5	unclassified_Arthropoda	0.12	unclassified_Arthropoda	0	unclassified_Arthropoda	0	unclassified_Arthropoda_sp	0	0	0	0	0	0	0	0	0	0	0	0	0	0	0	0	0	1	0	0	0	0	0	0	0	0	0	0	0	0	0	0	0	0	0
65f3bab4d3634d5c971a70134805f34d9aae0f5e	#N/A	Metazoa	0.92	Arthropoda	0.8	unclassified_Arthropoda	0.35	unclassified_Arthropoda	0.32	unclassified_Arthropoda	0.14	unclassified_Arthropoda	0	unclassified_Arthropoda_sp	0	0	0	0	0	0	0	0	0	0	0	0	0	0	0	0	0	0	0	0	0	0	0	0	0	0	0	0	0	0	0	0	0	0	0
c57fffc665ddaca4f54eea153b7d0ff1c142285b	#N/A	Metazoa	0.94	Arthropoda	0.8	unclassified_Arthropoda	0.38	unclassified_Arthropoda	0.03	unclassified_Arthropoda	0	unclassified_Arthropoda	0	unclassified_Arthropoda_sp	0	0	0	0	0	0	0	0	0	0	0	0	0	0	0	0	0	0	0	0	0	0	0	0	0	0	0	0	0	0	0	0	0	0	0
c78bb0b37d27f6a147da9314734f1aa1fe9b723e	#N/A	Metazoa	0.98	Arthropoda	0.84	unclassified_Arthropoda	0.25	unclassified_Arthropoda	0.21	unclassified_Arthropoda	0.04	unclassified_Arthropoda	0	unclassified_Arthropoda_sp	0	0	0	0	0	0	0	0	0	0	0	0	0	0	0	0	0	1	0	0	0	0	0	0	0	0	0	0	0	0	0	0	0	0	0
d6b07082afc4ce6835f4e5ad75d29236566c094f	#N/A	Metazoa	0.96	Arthropoda	0.91	unclassified_Arthropoda	0.73	unclassified_Arthropoda	0.31	unclassified_Arthropoda	0.05	unclassified_Arthropoda	0	unclassified_Arthropoda_sp	0	0	0	0	0	0	0	0	0	0	0	0	0	0	0	0	0	0	0	0	0	0	0	0	0	0	0	0	0	0	1	0	0	0	0
e9839ce30d625f603664c4335251667a22ff36ee	#N/A	Metazoa	0.99	Arthropoda	0.88	unclassified_Arthropoda	0.54	unclassified_Arthropoda	0.21	unclassified_Arthropoda	0.03	unclassified_Arthropoda	0	unclassified_Arthropoda_sp	0	0	0	0	0	0	0	0	0	0	0	0	0	0	0	0	0	0	0	0	0	0	0	0	0	0	0	0	0	0	0	0	0	0	0
1dfc19029dccffe6388a4c4a654a4bdfcce2cd88	#N/A	Metazoa	0.99	Arthropoda	0.93	unclassified_Arthropoda	0.64	unclassified_Arthropoda	0.16	unclassified_Arthropoda	0	unclassified_Arthropoda	0	unclassified_Arthropoda_sp	0	0	0	0	0	0	0	0	0	0	0	0	0	0	0	0	0	0	0	0	0	0	0	0	0	0	0	0	0	0	0	0	0	0	0
cf796406594eeb42917aeac09ae1e02acc6c53d5	#N/A	Metazoa	0.88	Arthropoda	0.8	unclassified_Arthropoda	0.58	unclassified_Arthropoda	0.11	unclassified_Arthropoda	0.02	unclassified_Arthropoda	0	unclassified_Arthropoda_sp	0	0	0	0	0	0	0	0	0	0	6	0	0	0	0	0	0	0	0	0	0	0	0	0	0	0	0	0	0	0	1	0	0	0	0
03ab655d4010326695a702fad5fd3529a98459bd	#N/A	Metazoa	1	Arthropoda	0.99	Insecta	0.99	Hymenoptera	0.98	Braconidae	0.98	unclassified_Braconidae	0.2	unclassified_Braconidae_sp	0.2	0	0	0	0	0	0	0	0	153	2	0	0	0	0	0	0	0	0	0	0	0	0	0	0	0	0	0	0	0	0	0	0	0	0
d8a352cd4341d3fa57c105069534c56d1bf76968	#N/A	Metazoa	1	Arthropoda	1	Insecta	1	Diptera	0.86	Cecidomyiidae	0.8	unclassified_Cecidomyiidae	0.79	unclassified_Cecidomyiidae_sp	0.4	0	0	0	0	0	0	0	0	0	0	0	0	0	0	0	0	0	0	0	0	0	0	0	0	0	0	0	0	0	0	0	0	0	0
818eccf6d7b87b9ece434982931570a717e86dde	#N/A	Metazoa	1	Arthropoda	1	Insecta	1	Diptera	0.83	Cecidomyiidae	0.82	unclassified_Cecidomyiidae	0.23	unclassified_Cecidomyiidae_sp	0.23	0	0	0	0	0	0	0	0	0	0	0	0	0	0	0	0	0	0	0	0	0	0	0	0	0	0	0	0	0	0	0	0	0	0
d973c6b7ba315d91b7750ad88c2606b6c8fd75b3	#N/A	Metazoa	1	Nematoda	0.99	Chromadorea	0.99	unclassified_Chromadorea	0.7	unclassified_Chromadorea	0.55	unclassified_Chromadorea	0.55	unclassified_Chromadorea_sp	0.24	0	0	0	0	0	0	0	0	0	0	0	0	0	0	0	0	0	0	0	0	0	0	0	0	0	0	0	0	0	0	0	0	0	0
17adad97797bf1f2fbc276f625e5271be0222dbd	#N/A	Metazoa	1	Nematoda	0.99	Chromadorea	0.99	unclassified_Chromadorea	0.51	unclassified_Chromadorea	0.42	unclassified_Chromadorea	0.42	unclassified_Chromadorea_sp	0.42	0	0	0	0	0	0	0	0	0	0	1	0	0	1	0	0	1	0	0	0	0	0	0	0	0	0	0	0	0	0	0	0	1	0
e2911c70e61d438fda0e33c28a40573ebc601e20	#N/A	Metazoa	1	Nematoda	1	Chromadorea	1	unclassified_Chromadorea	0.73	unclassified_Chromadorea	0.44	unclassified_Chromadorea	0.36	unclassified_Chromadorea_sp	0.09	0	0	0	0	0	0	0	0	0	0	0	0	0	0	0	0	0	0	0	0	0	0	0	0	0	0	0	0	0	0	0	0	0	0
cb7db387b0bfe59c97b5b06f27ead74980564e95	#N/A	Metazoa	1	Nematoda	1	Chromadorea	1	unclassified_Chromadorea	0.57	unclassified_Chromadorea	0.37	unclassified_Chromadorea	0.35	unclassified_Chromadorea_sp	0.15	0	0	0	0	0	0	0	0	0	1	0	1	4	0	0	0	0	0	0	1	0	0	0	0	4	11	2	16	17	0	0	0	0	0
6827329d861c735bda3c184d4accb33b363cf118	#N/A	Metazoa	0.99	Nematoda	0.86	Chromadorea	0.86	unclassified_Chromadorea	0.37	unclassified_Chromadorea	0.33	unclassified_Chromadorea	0.33	unclassified_Chromadorea_sp	0.33	0	0	0	0	0	0	0	0	0	1	0	0	0	0	0	0	0	0	0	0	0	0	0	0	0	0	0	0	0	0	0	0	0	0
54020d96132d9954b8eab5a2135be5c495b5528e	#N/A	Metazoa	1	Nematoda	0.92	Chromadorea	0.92	unclassified_Chromadorea	0.41	unclassified_Chromadorea	0.32	unclassified_Chromadorea	0.32	unclassified_Chromadorea_sp	0.32	0	0	0	0	0	0	0	0	0	0	0	0	0	0	0	0	0	1	0	0	0	0	0	0	0	0	0	0	0	0	0	0	0	0
037cd9250c8e80543bf9f27f87a21dc42807f2a6	#N/A	Metazoa	1	Nematoda	1	Chromadorea	1	unclassified_Chromadorea	0.68	unclassified_Chromadorea	0.34	unclassified_Chromadorea	0.3	unclassified_Chromadorea_sp	0.3	0	0	0	0	0	0	0	0	0	0	0	0	0	0	0	0	1	0	0	0	0	0	0	0	0	0	0	0	0	0	0	0	0	0
46c7a2fb16343a4d4740ca8b66e84bef6d894655	#N/A	Metazoa	1	Nematoda	0.85	Chromadorea	0.85	unclassified_Chromadorea	0.39	unclassified_Chromadorea	0.3	unclassified_Chromadorea	0.3	unclassified_Chromadorea_sp	0.28	0	0	0	0	0	0	0	0	0	0	0	0	0	0	0	0	0	0	1	1	0	0	0	0	0	0	0	0	0	0	0	0	0	0
5dd82d0a4ff7517d80b8e78b80e151f321b8099e	#N/A	Metazoa	1	Nematoda	1	Chromadorea	1	unclassified_Chromadorea	0.77	unclassified_Chromadorea	0.47	unclassified_Chromadorea	0.3	unclassified_Chromadorea_sp	0.19	0	0	0	0	0	0	0	0	0	0	0	0	0	0	0	0	0	0	0	0	0	0	0	0	0	0	0	0	0	0	0	0	0	0
fb9673458fc3a02c1f5d87fd7ec9a606f5ab678d	#N/A	Metazoa	0.98	Nematoda	0.97	Chromadorea	0.97	unclassified_Chromadorea	0.7	unclassified_Chromadorea	0.3	unclassified_Chromadorea	0.3	unclassified_Chromadorea_sp	0.16	0	0	0	0	0	0	0	0	0	0	0	0	0	0	0	0	0	0	0	0	0	0	0	0	0	0	0	0	0	0	0	0	1	0
ae18ce54b956329f5c1470c50520197f3bbef7f2	#N/A	Metazoa	1	Nematoda	1	Chromadorea	1	unclassified_Chromadorea	0.63	unclassified_Chromadorea	0.28	unclassified_Chromadorea	0.27	unclassified_Chromadorea_sp	0.16	0	0	0	0	0	0	0	0	0	0	1	0	0	0	0	0	0	0	0	0	0	0	0	0	0	0	0	0	0	0	0	0	0	0
0b2c0952dd0e6f0f565c96284e2dc852abcfda70	#N/A	Metazoa	1	Nematoda	0.99	Chromadorea	0.99	unclassified_Chromadorea	0.43	unclassified_Chromadorea	0.26	unclassified_Chromadorea	0.26	unclassified_Chromadorea_sp	0.26	0	0	0	0	0	0	0	2	0	0	0	0	0	0	0	0	0	0	0	0	0	0	0	0	0	0	0	0	0	0	0	0	0	0
2ebf6d4c68b12c32e70460564f216da632dbe43c	#N/A	Metazoa	0.99	Nematoda	0.82	Chromadorea	0.82	unclassified_Chromadorea	0.5	unclassified_Chromadorea	0.26	unclassified_Chromadorea	0.26	unclassified_Chromadorea_sp	0.25	0	0	0	0	0	0	0	0	0	0	0	0	0	0	0	0	2	0	0	0	0	0	0	0	0	0	0	0	0	0	0	0	0	0
8022ba302cdb7b55e035bcc3fe3bfc7790a3e976	#N/A	Metazoa	0.98	Nematoda	0.96	Chromadorea	0.96	unclassified_Chromadorea	0.76	unclassified_Chromadorea	0.39	unclassified_Chromadorea	0.25	unclassified_Chromadorea_sp	0.19	0	0	0	0	0	0	0	0	0	0	0	0	0	0	0	0	0	0	0	0	0	0	0	0	0	0	0	0	0	0	0	0	0	0
6639e06ed699cb01f1808d67e1a314346ea6b1e2	#N/A	Metazoa	1	Nematoda	0.9	Chromadorea	0.9	unclassified_Chromadorea	0.79	unclassified_Chromadorea	0.25	unclassified_Chromadorea	0.25	unclassified_Chromadorea_sp	0.18	0	0	0	0	0	0	0	0	0	0	0	0	0	0	0	0	0	0	0	0	0	0	0	0	0	0	0	0	0	0	0	0	0	0
8d61504cc315ba9f59233d4b983f484ecc2328a9	#N/A	Metazoa	1	Nematoda	1	Chromadorea	1	unclassified_Chromadorea	0.67	unclassified_Chromadorea	0.35	unclassified_Chromadorea	0.25	unclassified_Chromadorea_sp	0.17	0	0	0	0	0	0	0	0	0	0	0	0	0	0	0	0	0	0	0	0	0	0	0	1	0	0	0	0	0	0	0	0	0	0
27e26b230371480b8aa03121a67fcc9896aceb1f	#N/A	Metazoa	1	Nematoda	0.9	Chromadorea	0.9	unclassified_Chromadorea	0.44	unclassified_Chromadorea	0.24	unclassified_Chromadorea	0.24	unclassified_Chromadorea_sp	0.24	47	3	1	0	0	0	0	0	0	0	0	0	0	0	0	0	0	0	0	0	0	0	0	0	0	0	0	0	0	150	0	0	0	0
2bff21a7d431737b9bb78644a814732f2c56261b	#N/A	Metazoa	1	Nematoda	1	Chromadorea	1	unclassified_Chromadorea	0.4	unclassified_Chromadorea	0.23	unclassified_Chromadorea	0.23	unclassified_Chromadorea_sp	0.23	0	0	0	0	0	0	0	0	0	0	0	0	1	0	0	0	0	0	0	0	0	0	0	0	0	0	0	0	0	0	0	0	0	0
bb439f9fc8143787f67bcc6bd9a70dd43934f745	#N/A	Metazoa	1	Nematoda	1	Chromadorea	1	unclassified_Chromadorea	0.54	unclassified_Chromadorea	0.3	unclassified_Chromadorea	0.23	unclassified_Chromadorea_sp	0.23	0	0	0	0	0	0	1	0	0	0	0	0	0	0	0	0	0	0	0	0	0	0	0	0	0	0	0	0	0	0	0	0	0	0
6e686003646e930841fc454d14e1d2fa33b333e6	#N/A	Metazoa	1	Nematoda	0.9	Chromadorea	0.9	unclassified_Chromadorea	0.69	unclassified_Chromadorea	0.23	unclassified_Chromadorea	0.23	unclassified_Chromadorea_sp	0.17	0	0	0	0	0	0	0	0	0	0	0	0	0	0	0	0	0	0	0	0	0	0	0	0	0	0	0	0	0	0	0	20	0	0
1868fac0f196a0144e115b7c149f837b88f005a1	#N/A	Metazoa	1	Nematoda	1	Chromadorea	1	unclassified_Chromadorea	0.31	unclassified_Chromadorea	0.22	unclassified_Chromadorea	0.22	unclassified_Chromadorea_sp	0.22	0	0	0	0	0	0	0	0	0	0	0	0	0	0	0	0	0	0	0	1	0	0	0	0	0	0	0	0	0	0	0	0	0	0
cce66ce5debc9ba7d951b87e17eb9314c199990a	#N/A	Metazoa	1	Nematoda	0.91	Chromadorea	0.91	unclassified_Chromadorea	0.41	unclassified_Chromadorea	0.22	unclassified_Chromadorea	0.22	unclassified_Chromadorea_sp	0.22	0	0	0	0	0	0	0	0	0	0	0	0	0	0	0	0	0	0	0	0	0	0	0	0	0	0	0	0	0	0	0	0	0	0
f6cee97109bdc859209bd138780afa8ea0f74924	#N/A	Metazoa	0.98	Nematoda	0.88	Chromadorea	0.88	unclassified_Chromadorea	0.37	unclassified_Chromadorea	0.22	unclassified_Chromadorea	0.22	unclassified_Chromadorea_sp	0.22	0	0	0	1	0	0	0	0	0	0	0	0	0	0	0	0	0	0	0	0	0	0	0	0	0	0	0	0	0	0	0	0	0	0
f0aa3c006ef8d8cdc86e90b6bb36f65f960d6213	#N/A	Metazoa	1	Nematoda	1	Chromadorea	1	unclassified_Chromadorea	0.4	unclassified_Chromadorea	0.22	unclassified_Chromadorea	0.22	unclassified_Chromadorea_sp	0.13	0	0	0	0	0	0	0	0	0	0	0	0	0	0	0	0	0	0	0	0	0	0	0	0	0	0	0	0	0	0	0	0	1	0
3ce9121cea6d386f2b2a366f7caee342108ca6f1	#N/A	Metazoa	1	Nematoda	0.84	Chromadorea	0.84	unclassified_Chromadorea	0.56	unclassified_Chromadorea	0.22	unclassified_Chromadorea	0.22	unclassified_Chromadorea_sp	0.11	0	0	1	0	0	0	0	0	0	0	0	0	0	0	0	0	0	0	0	0	0	0	0	0	0	0	0	0	0	0	0	0	0	0
5802171e853f6be030702c54c9088c482c4dcdaf	#N/A	Metazoa	1	Nematoda	1	Chromadorea	1	unclassified_Chromadorea	0.62	unclassified_Chromadorea	0.35	unclassified_Chromadorea	0.21	unclassified_Chromadorea_sp	0.21	0	0	0	0	0	0	0	0	0	0	0	0	0	0	0	0	0	0	0	0	0	0	0	0	0	0	0	0	0	0	0	0	0	0
dbaefb990af02e6f660786ac55b03b122ce953f6	#N/A	Metazoa	1	Nematoda	1	Chromadorea	1	unclassified_Chromadorea	0.73	unclassified_Chromadorea	0.21	unclassified_Chromadorea	0.21	unclassified_Chromadorea_sp	0.21	0	0	0	0	0	0	0	0	0	0	0	0	0	0	0	0	0	0	0	0	0	0	0	0	0	0	0	0	0	0	0	0	0	0
0f48609ad00e055b5185967e7e6f7284fc41991b	#N/A	Metazoa	1	Nematoda	0.83	Chromadorea	0.83	unclassified_Chromadorea	0.67	unclassified_Chromadorea	0.2	unclassified_Chromadorea	0.2	unclassified_Chromadorea_sp	0.09	3	109	310	2	16	0	0	0	0	0	0	0	0	0	0	0	0	0	2	1	0	0	0	0	0	0	0	0	0	12	320	2	0	27
31942d8c33c4361135a069b393cc9001d019d6c8	#N/A	Metazoa	1	Nematoda	1	Chromadorea	1	unclassified_Chromadorea	0.6	unclassified_Chromadorea	0.19	unclassified_Chromadorea	0.19	unclassified_Chromadorea_sp	0.19	0	0	0	0	0	0	0	0	1	0	0	0	0	0	0	0	0	0	0	0	0	0	0	0	0	0	0	0	0	0	0	0	0	0
122ac9b1720f75c7f51bde0c5ee3973efb433c8d	#N/A	Metazoa	0.98	Nematoda	0.8	Chromadorea	0.8	unclassified_Chromadorea	0.67	unclassified_Chromadorea	0.24	unclassified_Chromadorea	0.19	unclassified_Chromadorea_sp	0.13	0	0	0	0	0	0	0	0	1	0	0	0	0	0	0	0	0	0	0	0	0	0	0	0	0	0	0	0	0	0	0	0	0	0
655c90ba0f366717330adfe773ec65d27dfb6eca	#N/A	Metazoa	1	Nematoda	0.99	Chromadorea	0.99	unclassified_Chromadorea	0.68	unclassified_Chromadorea	0.19	unclassified_Chromadorea	0.19	unclassified_Chromadorea_sp	0.07	1	2	0	2	0	0	0	1	0	0	0	0	0	0	0	0	0	0	0	0	0	0	0	0	0	0	0	0	0	0	0	1	1	0
d8ef62c5cd5f983f0e3a2f8d272eb8e4cef0ac03	#N/A	Metazoa	1	Nematoda	0.83	Chromadorea	0.83	unclassified_Chromadorea	0.54	unclassified_Chromadorea	0.19	unclassified_Chromadorea	0.18	unclassified_Chromadorea_sp	0.17	0	0	0	0	0	0	0	0	0	0	0	0	0	0	0	0	0	0	0	0	0	0	0	0	0	0	1	0	0	0	0	0	0	0
11f802bde39ee4c5fdb1f6c4c8bec137c95aedef	#N/A	Metazoa	0.95	Nematoda	0.81	Chromadorea	0.81	unclassified_Chromadorea	0.65	unclassified_Chromadorea	0.18	unclassified_Chromadorea	0.18	unclassified_Chromadorea_sp	0.11	0	0	0	2	0	0	0	0	0	0	0	0	0	0	0	0	0	0	0	0	0	0	0	0	0	0	0	0	0	0	0	0	0	0
3a59577c92ec559b2946d7a4baaed53fce15c499	#N/A	Metazoa	1	Nematoda	1	Chromadorea	1	unclassified_Chromadorea	0.47	unclassified_Chromadorea	0.17	unclassified_Chromadorea	0.17	unclassified_Chromadorea_sp	0.17	0	0	0	0	0	1	0	0	0	0	0	0	0	2	0	0	0	0	0	0	0	0	0	1	0	1	0	0	0	0	1	0	0	0
c853b7e5898c6b93d7d41620ed0764dad810af9f	#N/A	Metazoa	1	Nematoda	0.96	Chromadorea	0.96	unclassified_Chromadorea	0.5	unclassified_Chromadorea	0.2	unclassified_Chromadorea	0.17	unclassified_Chromadorea_sp	0.17	0	0	0	0	0	0	0	0	0	0	1	0	0	0	0	6	0	4	20	0	0	0	0	0	0	0	0	0	0	0	0	0	0	0
ed548d8f1fe059a5563df022abea913d6ae7d174	#N/A	Metazoa	0.99	Nematoda	0.83	Chromadorea	0.83	unclassified_Chromadorea	0.66	unclassified_Chromadorea	0.17	unclassified_Chromadorea	0.17	unclassified_Chromadorea_sp	0.1	0	0	0	0	0	0	0	0	28	3	1	0	0	0	0	0	0	0	0	0	0	0	0	0	0	0	0	0	0	0	0	0	0	0
65efc49d3f0b2437b1bd77318089595aa8fda13e	#N/A	Metazoa	0.93	Nematoda	0.86	Chromadorea	0.86	unclassified_Chromadorea	0.76	unclassified_Chromadorea	0.16	unclassified_Chromadorea	0.16	unclassified_Chromadorea_sp	0.16	0	0	0	0	0	0	0	0	0	0	0	0	0	0	0	0	0	0	0	0	0	0	0	0	0	0	0	0	0	0	0	0	0	0
034c8174fe47be1f0be99f04d5e1c83840812d01	#N/A	Metazoa	1	Nematoda	1	Chromadorea	1	unclassified_Chromadorea	0.61	unclassified_Chromadorea	0.19	unclassified_Chromadorea	0.16	unclassified_Chromadorea_sp	0.16	0	0	0	0	0	0	0	0	0	0	0	0	0	0	1	0	0	0	0	0	0	0	0	0	0	0	0	0	0	0	0	1	0	0
1a79c884f28e8c5efe17bd21a0edadb7ec15ce58	#N/A	Metazoa	1	Nematoda	1	Chromadorea	1	unclassified_Chromadorea	0.76	unclassified_Chromadorea	0.28	unclassified_Chromadorea	0.15	unclassified_Chromadorea_sp	0.15	0	0	0	0	0	0	0	0	0	0	0	0	0	0	0	8	3	0	0	0	0	0	0	0	0	0	0	1	0	0	0	0	1	0
caec2167506ff611efbec49233fcc0428099efcf	#N/A	Metazoa	1	Nematoda	1	Chromadorea	1	unclassified_Chromadorea	0.21	unclassified_Chromadorea	0.15	unclassified_Chromadorea	0.15	unclassified_Chromadorea_sp	0.14	0	0	0	0	0	0	0	0	0	0	0	1	0	0	0	0	0	0	0	0	0	0	0	0	0	0	0	0	0	0	0	0	0	0
6f5aba8bb885e9e27e9b4d99db837057beb32eb1	#N/A	Metazoa	1	Nematoda	0.96	Chromadorea	0.96	unclassified_Chromadorea	0.73	unclassified_Chromadorea	0.16	unclassified_Chromadorea	0.15	unclassified_Chromadorea_sp	0.12	0	0	0	0	0	0	0	0	0	0	0	0	0	0	0	0	0	0	0	0	0	0	0	0	0	0	0	3	1	0	0	0	0	0
dbbcadb0355188c1ae3e05cf3097e1a18391fa4d	#N/A	Metazoa	1	Nematoda	1	Chromadorea	1	unclassified_Chromadorea	0.57	unclassified_Chromadorea	0.23	unclassified_Chromadorea	0.14	unclassified_Chromadorea_sp	0.14	0	0	0	0	0	0	0	0	0	0	0	0	0	0	0	0	0	0	0	0	0	0	0	0	0	0	0	0	0	0	0	0	0	0
0c1de741cc88a2718c959a582959a4fac94c41c4	#N/A	Metazoa	1	Nematoda	0.9	Chromadorea	0.9	unclassified_Chromadorea	0.64	unclassified_Chromadorea	0.14	unclassified_Chromadorea	0.14	unclassified_Chromadorea_sp	0.1	0	0	0	0	0	0	0	0	0	0	0	0	0	0	0	0	0	0	0	1	0	0	0	0	0	0	0	0	0	0	0	0	0	0
83cf654de69c7a6a2a8e2a39e2b51a49c0bf35bc	#N/A	Metazoa	1	Nematoda	0.88	Chromadorea	0.88	unclassified_Chromadorea	0.66	unclassified_Chromadorea	0.25	unclassified_Chromadorea	0.13	unclassified_Chromadorea_sp	0.13	0	0	0	0	0	0	0	0	0	0	0	0	0	0	0	0	0	0	0	0	0	0	0	0	0	0	0	1	0	0	0	0	0	0
ff3a7bda0e32d529ca4316fe448b3c629250d569	#N/A	Metazoa	1	Nematoda	0.98	Chromadorea	0.98	unclassified_Chromadorea	0.68	unclassified_Chromadorea	0.12	unclassified_Chromadorea	0.12	unclassified_Chromadorea_sp	0.12	0	0	8	0	1	0	0	0	0	0	0	0	0	0	0	0	0	0	0	0	0	0	0	0	0	0	0	0	0	0	0	0	0	0
52c9507845114fb5d0c5d9a3237304b58e688182	#N/A	Metazoa	1	Nematoda	0.89	Chromadorea	0.89	unclassified_Chromadorea	0.68	unclassified_Chromadorea	0.22	unclassified_Chromadorea	0.11	unclassified_Chromadorea_sp	0.1	0	0	0	0	0	0	0	0	0	0	0	0	0	0	0	0	0	0	0	0	0	0	0	0	0	0	0	0	0	0	0	0	0	0
9d3dda4231e91eb5de35eb3ef9a43b5c7ca688a2	#N/A	Metazoa	1	Nematoda	0.98	Chromadorea	0.98	unclassified_Chromadorea	0.79	unclassified_Chromadorea	0.11	unclassified_Chromadorea	0.11	unclassified_Chromadorea_sp	0.1	1	0	0	0	0	0	0	0	0	0	0	0	0	0	0	0	0	0	0	0	0	0	0	0	0	0	0	0	0	0	0	0	0	0
2088d53697f6e278091deb7d2608f961908993d3	#N/A	Metazoa	0.97	Nematoda	0.87	Chromadorea	0.87	unclassified_Chromadorea	0.57	unclassified_Chromadorea	0.1	unclassified_Chromadorea	0.1	unclassified_Chromadorea_sp	0.1	0	0	0	1	0	0	0	0	0	0	0	0	0	0	0	0	0	0	0	0	0	0	0	0	0	0	0	0	0	0	0	0	0	0
96404ca85e1f24546c51026441399295bcf709d8	#N/A	Metazoa	1	Nematoda	1	Chromadorea	1	unclassified_Chromadorea	0.67	unclassified_Chromadorea	0.15	unclassified_Chromadorea	0.1	unclassified_Chromadorea_sp	0.1	0	0	0	0	0	0	0	0	0	0	0	0	0	0	0	0	0	0	0	0	0	0	0	1	0	0	0	0	0	0	0	0	0	0
50f4bb466d7cf6387c33b868de29518b6f1aee9b	#N/A	Metazoa	1	Nematoda	1	Chromadorea	0.99	unclassified_Chromadorea	0.54	unclassified_Chromadorea	0.1	unclassified_Chromadorea	0.1	unclassified_Chromadorea_sp	0.1	0	0	0	0	0	0	0	1	0	0	0	0	0	0	0	0	0	0	0	0	0	0	0	0	0	0	0	0	0	0	0	0	0	0
9466cf9f34cde3f5c7cf474fdfb287d45f915512	#N/A	Metazoa	1	Nematoda	1	Chromadorea	1	unclassified_Chromadorea	0.25	unclassified_Chromadorea	0.1	unclassified_Chromadorea	0.1	unclassified_Chromadorea_sp	0.1	1	0	0	3	0	0	0	0	0	0	0	0	0	0	1	3	1	0	0	0	0	0	0	0	2	0	1	1	0	0	0	0	3	0
1978c1d439d69006588883e4e6be89dff62bb69e	#N/A	Metazoa	1	Nematoda	0.86	Chromadorea	0.86	unclassified_Chromadorea	0.75	unclassified_Chromadorea	0.1	unclassified_Chromadorea	0.1	unclassified_Chromadorea_sp	0.08	0	0	0	0	0	0	0	0	0	0	0	0	0	0	0	0	0	0	0	0	0	0	0	0	0	0	0	0	0	0	0	0	0	0
0b11916722722c520c83dba1f3c3f9760b4b7bf8	#N/A	Metazoa	0.99	Nematoda	0.96	Chromadorea	0.96	unclassified_Chromadorea	0.38	unclassified_Chromadorea	0.09	unclassified_Chromadorea	0.09	unclassified_Chromadorea_sp	0.09	0	0	0	0	0	0	1	0	0	0	0	0	0	0	0	0	0	0	0	0	0	0	0	0	0	0	0	0	0	0	0	0	0	0
5af58f6f9d505fb49cc0ea72aa583e9790b01ced	#N/A	Metazoa	1	Nematoda	0.85	Chromadorea	0.85	unclassified_Chromadorea	0.58	unclassified_Chromadorea	0.09	unclassified_Chromadorea	0.09	unclassified_Chromadorea_sp	0.09	0	0	0	0	0	0	0	0	0	0	0	0	0	0	0	0	0	0	0	0	0	0	0	0	0	0	0	0	0	0	0	1	0	0
0ba1c34ac84b012b70bde2eaf9eead0ba3d1692d	#N/A	Metazoa	0.99	Nematoda	0.83	Chromadorea	0.83	unclassified_Chromadorea	0.66	unclassified_Chromadorea	0.11	unclassified_Chromadorea	0.09	unclassified_Chromadorea_sp	0.07	1	0	0	0	0	0	0	0	0	0	0	0	0	0	0	0	4	0	0	0	0	0	0	0	0	0	0	0	0	0	0	0	0	0
3d254a7b4e7e85af7513310388969a2f581d266a	#N/A	Metazoa	0.99	Nematoda	0.97	Chromadorea	0.97	unclassified_Chromadorea	0.66	unclassified_Chromadorea	0.17	unclassified_Chromadorea	0.08	unclassified_Chromadorea_sp	0.08	0	0	0	0	0	0	0	0	0	0	0	0	0	0	0	0	0	0	0	0	0	0	1	0	0	0	0	0	0	0	0	0	0	0
8a8c50d97bbfc9d4afb03882922265a952fdb31c	#N/A	Metazoa	1	Nematoda	0.94	Chromadorea	0.94	unclassified_Chromadorea	0.7	unclassified_Chromadorea	0.17	unclassified_Chromadorea	0.07	unclassified_Chromadorea_sp	0.07	0	0	0	0	0	0	0	0	0	0	0	0	0	0	0	0	0	0	0	0	0	0	0	0	0	0	0	0	0	0	0	0	0	0
6f3ad3bb5cf26368150647237805b5f2b38a3fb2	#N/A	Metazoa	0.98	Nematoda	0.9	Chromadorea	0.9	unclassified_Chromadorea	0.68	unclassified_Chromadorea	0.2	unclassified_Chromadorea	0.06	unclassified_Chromadorea_sp	0.06	0	0	0	0	0	0	0	0	0	0	0	0	0	0	0	0	0	0	0	1	0	0	0	0	0	0	0	0	0	0	0	0	0	0
5cd02950d932535409486f1e29236edfd1edceaf	#N/A	Metazoa	1	Annelida	0.98	Clitellata	0.97	unclassified_Clitellata	0.7	unclassified_Clitellata	0.69	unclassified_Clitellata	0.62	unclassified_Clitellata_sp	0.62	1	0	0	0	0	0	0	0	0	0	0	0	0	0	0	0	0	0	0	0	0	0	0	0	0	0	0	0	0	0	0	0	0	0
cc93121c2ebae6fde3e8ddbcdd7d9b804a91af43	#N/A	Metazoa	1	Annelida	0.97	Clitellata	0.95	unclassified_Clitellata	0.69	unclassified_Clitellata	0.69	unclassified_Clitellata	0.6	unclassified_Clitellata_sp	0.12	0	0	0	0	0	0	0	0	0	0	0	0	0	0	0	0	0	0	0	0	0	0	0	0	0	0	0	0	0	0	0	0	0	0
3d93fc404693208129d53f1a652539c829f7f7a2	#N/A	Metazoa	1	Annelida	1	Clitellata	1	unclassified_Clitellata	0.72	unclassified_Clitellata	0.63	unclassified_Clitellata	0.56	unclassified_Clitellata_sp	0.56	0	0	0	0	0	0	0	0	0	0	0	0	0	0	0	0	0	0	0	0	0	0	0	0	0	0	1	0	0	0	0	0	0	0
2470c48fc9af41ff424f7e998b3ba1e63457e680	#N/A	Metazoa	1	Annelida	0.94	Clitellata	0.92	unclassified_Clitellata	0.76	unclassified_Clitellata	0.76	unclassified_Clitellata	0.17	unclassified_Clitellata_sp	0.17	0	0	0	0	0	0	0	0	0	0	0	0	0	0	0	0	0	0	4	0	0	0	0	89	0	0	12	0	0	0	0	0	0	0
f2aa866f1fef7ee09370ed91f990bf6773bc1474	#N/A	Metazoa	1	Annelida	0.92	Clitellata	0.83	unclassified_Clitellata	0.44	unclassified_Clitellata	0.12	unclassified_Clitellata	0.06	unclassified_Clitellata_sp	0.06	0	0	0	0	0	0	0	0	0	0	0	0	0	0	0	0	0	0	0	0	0	0	0	0	0	1	0	0	0	0	0	0	0	0
e1458321b5a9a63ec70b9c83409a00f68fc2e062	#N/A	Metazoa	0.99	Arthropoda	0.95	Collembola	0.82	unclassified_Collembola	0.78	unclassified_Collembola	0.66	unclassified_Collembola	0.65	unclassified_Collembola_sp	0.6	0	0	0	0	0	0	0	0	5	0	0	4	45	0	1	0	127	0	1	0	2	0	2	2	0	0	0	0	0	0	0	0	0	0
c6b7cc374447cd96dc936755719d3a6761a2a972	#N/A	Metazoa	1	Arthropoda	1	Insecta	0.99	Diptera	0.87	unclassified_Diptera	0.68	unclassified_Diptera	0.68	unclassified_Diptera_sp	0.28	0	0	0	0	0	0	0	0	0	0	0	0	0	0	0	0	0	0	0	0	0	0	0	0	0	0	0	0	0	0	0	0	0	0
1b5efcc01266f2fcfd8462bad39582ce333380e7	#N/A	Metazoa	1	Arthropoda	1	Insecta	1	Diptera	0.85	unclassified_Diptera	0.6	unclassified_Diptera	0.6	unclassified_Diptera_sp	0.14	0	0	0	1	0	0	0	0	0	0	0	0	0	0	0	0	0	0	0	0	0	0	1	0	0	0	0	0	0	0	0	0	0	0
703855010fb0f501df197ffb280139d0b923ca9c	#N/A	Metazoa	1	Arthropoda	1	Insecta	0.99	Diptera	0.83	unclassified_Diptera	0.47	unclassified_Diptera	0.44	unclassified_Diptera_sp	0.44	0	0	0	0	0	0	0	0	0	0	0	0	0	0	0	0	0	0	0	0	0	0	0	0	0	0	0	0	0	0	0	0	0	0
a3dbeac14ed1bd4d59ae2e0177ec67860f4ba45b	#N/A	Metazoa	1	Annelida	0.99	Clitellata	0.99	Enchytraeida	0.9	Enchytraeidae	0.9	unclassified_Enchytraeidae	0.76	unclassified_Enchytraeidae_sp	0.47	1	0	1	1	0	0	0	0	0	0	0	0	0	0	0	0	0	0	0	0	0	2	0	0	0	0	0	0	0	0	0	0	0	1
1154aeb28b12a053b81d138877b3a6d5d91d8512	#N/A	Metazoa	1	Annelida	0.88	Clitellata	0.86	Enchytraeida	0.81	Enchytraeidae	0.81	unclassified_Enchytraeidae	0.7	unclassified_Enchytraeidae_sp	0.43	0	0	0	0	0	0	0	0	0	0	0	0	0	0	0	0	0	0	0	0	0	0	0	0	0	0	0	1	0	0	0	0	0	0
5be7658e029ed0d50db8466b302849566914b142	#N/A	Metazoa	1	Annelida	0.94	Clitellata	0.94	Enchytraeida	0.87	Enchytraeidae	0.87	unclassified_Enchytraeidae	0.7	unclassified_Enchytraeidae_sp	0.14	1	0	0	0	0	0	0	0	0	0	0	0	0	0	0	0	0	0	0	0	0	0	0	0	0	0	0	0	0	0	0	0	0	0
a64b5ebd20fb5163ac2c2d990af68fb74aedc8f9	#N/A	Metazoa	1	Annelida	0.98	Clitellata	0.97	Enchytraeida	0.87	Enchytraeidae	0.87	unclassified_Enchytraeidae	0.53	unclassified_Enchytraeidae_sp	0.16	0	0	0	0	1	0	0	0	0	0	0	0	0	0	0	0	0	0	0	0	0	0	0	0	0	0	0	0	0	0	0	0	0	0
d2131d801a46a2cecbbe26aa985585cf5da6ede4	#N/A	Metazoa	1	Annelida	1	Clitellata	0.97	Enchytraeida	0.82	Enchytraeidae	0.82	unclassified_Enchytraeidae	0.17	unclassified_Enchytraeidae_sp	0.15	0	0	0	0	0	0	0	0	0	0	0	0	1	0	0	0	0	0	0	0	0	0	0	0	47	0	0	32	16	0	0	0	0	0
f90f16085cdecaf688e36cb3eb29ab5bb27cccc1	#N/A	Metazoa	1	Arthropoda	0.96	Collembola	0.86	Entomobryomorpha	0.82	unclassified_Entomobryomorpha	0.54	unclassified_Entomobryomorpha	0.51	unclassified_Entomobryomorpha_sp	0.51	0	0	0	0	0	0	0	0	0	0	0	0	0	0	0	0	0	0	0	0	0	0	0	0	0	0	0	0	0	1	0	0	0	0
52a59ce40fc2afb18b3f0e71ca994d7675961346	#N/A	Metazoa	1	Rotifera	1	Eurotatoria	1	unclassified_Eurotatoria	0.79	unclassified_Eurotatoria	0.79	unclassified_Eurotatoria	0.79	unclassified_Eurotatoria_sp	0.79	0	0	0	0	0	0	0	0	0	0	0	0	0	0	0	0	1	0	0	0	0	0	0	0	0	0	0	0	0	0	0	0	0	0
8fb3e67cb812b5e37e55339d225adc61cf24fa1e	#N/A	Metazoa	1	Rotifera	1	Eurotatoria	1	unclassified_Eurotatoria	0.79	unclassified_Eurotatoria	0.79	unclassified_Eurotatoria	0.79	unclassified_Eurotatoria_sp	0.78	0	0	0	0	0	0	0	0	0	0	0	0	0	0	1	0	0	0	0	0	0	0	0	0	0	0	0	0	0	0	0	0	0	0
1a24af945920d7d0cbeb2b68d8595e8c496cf28b	#N/A	Metazoa	1	Rotifera	1	Eurotatoria	1	unclassified_Eurotatoria	0.79	unclassified_Eurotatoria	0.79	unclassified_Eurotatoria	0.79	unclassified_Eurotatoria_sp	0.76	0	0	0	0	0	0	0	0	0	0	1	0	0	0	0	0	0	0	0	0	0	0	0	0	0	0	0	0	0	0	0	0	0	0
cdc582eb1a1261f7bff78d9e455682ad1bf814d8	#N/A	Metazoa	1	Rotifera	1	Eurotatoria	1	unclassified_Eurotatoria	0.79	unclassified_Eurotatoria	0.79	unclassified_Eurotatoria	0.78	unclassified_Eurotatoria_sp	0.78	0	0	0	0	0	0	0	0	0	0	0	0	0	0	0	0	0	0	0	0	0	0	0	0	0	0	0	0	0	0	0	0	0	0
9a57cc65bbe27d4e730edea82cc159e15ae193ac	#N/A	Metazoa	1	Rotifera	1	Eurotatoria	1	unclassified_Eurotatoria	0.78	unclassified_Eurotatoria	0.78	unclassified_Eurotatoria	0.78	unclassified_Eurotatoria_sp	0.78	0	0	0	0	0	0	0	0	0	0	0	0	0	0	0	0	4	0	0	0	0	0	0	0	0	0	0	0	0	0	0	0	0	0
966db0c66c29036eb7d0f8a9ea6660d75da1b01d	#N/A	Metazoa	1	Rotifera	1	Eurotatoria	1	unclassified_Eurotatoria	0.78	unclassified_Eurotatoria	0.78	unclassified_Eurotatoria	0.78	unclassified_Eurotatoria_sp	0.78	0	4	3	0	0	0	0	0	0	0	0	0	0	0	0	0	0	0	0	0	0	0	0	0	0	0	0	0	0	0	0	0	0	0
b93b4d6300dabe5cc50078bdcb89dbd521bc4e56	#N/A	Metazoa	1	Rotifera	1	Eurotatoria	1	unclassified_Eurotatoria	0.77	unclassified_Eurotatoria	0.77	unclassified_Eurotatoria	0.77	unclassified_Eurotatoria_sp	0.77	0	0	0	0	0	0	0	0	0	0	0	0	0	0	0	0	0	0	0	0	0	0	0	0	0	0	0	0	0	0	0	0	0	0
acec0c8f8746d3f929394e69773142ca0060a74d	#N/A	Metazoa	1	Rotifera	1	Eurotatoria	1	unclassified_Eurotatoria	0.77	unclassified_Eurotatoria	0.77	unclassified_Eurotatoria	0.77	unclassified_Eurotatoria_sp	0.77	0	0	0	0	0	0	0	0	0	0	0	0	0	0	0	0	0	0	0	0	0	0	0	5	0	0	0	0	0	0	0	0	0	0
ef36096ed0954dab4102d8cc4f0949f6327ae4d2	#N/A	Metazoa	1	Rotifera	1	Eurotatoria	1	unclassified_Eurotatoria	0.77	unclassified_Eurotatoria	0.77	unclassified_Eurotatoria	0.77	unclassified_Eurotatoria_sp	0.75	0	0	0	0	0	1	0	0	0	0	0	0	0	0	0	0	0	0	0	0	0	0	0	0	0	0	0	0	0	0	0	0	0	0
167dde6e09353bde9dfd4a2ad9193d1c46b034ef	#N/A	Metazoa	1	Rotifera	1	Eurotatoria	1	unclassified_Eurotatoria	0.77	unclassified_Eurotatoria	0.77	unclassified_Eurotatoria	0.77	unclassified_Eurotatoria_sp	0.73	0	0	0	0	0	0	0	0	0	0	0	0	3	0	0	0	0	0	0	0	0	0	0	0	0	0	0	0	0	0	0	0	0	0
aab55df54e36aba0cc4848a3259ce50a98f2eb5a	#N/A	Metazoa	1	Rotifera	1	Eurotatoria	1	unclassified_Eurotatoria	0.77	unclassified_Eurotatoria	0.77	unclassified_Eurotatoria	0.77	unclassified_Eurotatoria_sp	0.54	0	0	0	0	0	0	0	0	0	0	0	0	0	0	0	0	0	0	0	0	0	1	0	0	0	0	0	0	0	0	0	0	0	0
c059525800ba206e0bf63f0d5fdfcbfa4dabdd5e	#N/A	Metazoa	1	Rotifera	1	Eurotatoria	1	unclassified_Eurotatoria	0.76	unclassified_Eurotatoria	0.76	unclassified_Eurotatoria	0.76	unclassified_Eurotatoria_sp	0.75	6	1	0	0	0	0	0	0	0	0	0	0	0	0	0	0	0	0	0	0	0	0	0	0	0	0	0	0	0	0	0	0	0	0
82b08708e2103902028c4a9de2546bdc01e160a7	#N/A	Metazoa	1	Rotifera	1	Eurotatoria	1	unclassified_Eurotatoria	0.75	unclassified_Eurotatoria	0.75	unclassified_Eurotatoria	0.75	unclassified_Eurotatoria_sp	0.75	0	0	0	0	0	0	0	0	0	0	0	0	0	0	0	1	0	0	0	0	0	0	0	0	0	0	0	0	0	0	0	0	0	0
a04c5c77f37ac39133a4465f29d9f95b8fc56990	#N/A	Metazoa	1	Rotifera	1	Eurotatoria	1	unclassified_Eurotatoria	0.75	unclassified_Eurotatoria	0.75	unclassified_Eurotatoria	0.75	unclassified_Eurotatoria_sp	0.75	0	0	0	0	0	0	0	0	0	0	0	0	0	0	0	0	0	0	0	0	0	0	0	0	0	0	0	0	0	0	0	0	0	0
2ee0aaf3da2cef649f03a3378382ce9dc23b319b	#N/A	Metazoa	1	Rotifera	1	Eurotatoria	1	unclassified_Eurotatoria	0.75	unclassified_Eurotatoria	0.75	unclassified_Eurotatoria	0.75	unclassified_Eurotatoria_sp	0.75	5	0	0	0	0	0	0	0	0	0	0	0	0	0	0	0	0	0	0	0	0	0	0	0	0	0	0	0	0	2	0	0	0	0
976fde8b354db2facb326d41eb68b30772286edd	#N/A	Metazoa	1	Rotifera	1	Eurotatoria	1	unclassified_Eurotatoria	0.75	unclassified_Eurotatoria	0.75	unclassified_Eurotatoria	0.75	unclassified_Eurotatoria_sp	0.75	0	0	2	0	0	0	0	0	0	0	0	0	0	0	0	0	0	0	0	0	0	0	0	0	0	0	0	0	0	69	9	0	0	0
60283662e72db35675c3416ebad406ad503732f3	#N/A	Metazoa	1	Rotifera	1	Eurotatoria	1	unclassified_Eurotatoria	0.75	unclassified_Eurotatoria	0.75	unclassified_Eurotatoria	0.75	unclassified_Eurotatoria_sp	0.72	0	0	0	0	0	0	0	0	0	0	0	0	0	0	0	0	0	0	0	0	0	0	0	0	0	0	0	0	0	0	0	0	0	0
4c10c654898d1ee99d8c722afdc2aa89a4617d7a	#N/A	Metazoa	1	Rotifera	1	Eurotatoria	1	unclassified_Eurotatoria	0.75	unclassified_Eurotatoria	0.75	unclassified_Eurotatoria	0.75	unclassified_Eurotatoria_sp	0.7	0	0	0	0	0	0	0	0	0	0	0	0	0	0	0	0	0	1	0	0	0	0	0	0	0	0	0	0	0	0	0	0	0	0
d123d5a8e1438c6f19804a2927d402a4a2ecf6fa	#N/A	Metazoa	1	Rotifera	1	Eurotatoria	1	unclassified_Eurotatoria	0.74	unclassified_Eurotatoria	0.74	unclassified_Eurotatoria	0.74	unclassified_Eurotatoria_sp	0.74	0	0	0	0	0	0	0	1	0	0	0	0	0	0	0	0	0	0	0	0	0	0	0	0	0	0	0	0	0	0	0	0	0	0
8e17eca4f09a9587c576d1502624d1326243ba31	#N/A	Metazoa	1	Rotifera	1	Eurotatoria	1	unclassified_Eurotatoria	0.74	unclassified_Eurotatoria	0.74	unclassified_Eurotatoria	0.74	unclassified_Eurotatoria_sp	0.71	0	0	0	0	0	0	0	0	0	0	0	0	0	0	0	0	1	0	0	0	0	0	0	0	0	0	0	0	0	0	0	0	0	0
90267a4d586476b3d2f4d786410262bdaacd93a8	#N/A	Metazoa	1	Rotifera	1	Eurotatoria	1	unclassified_Eurotatoria	0.74	unclassified_Eurotatoria	0.74	unclassified_Eurotatoria	0.74	unclassified_Eurotatoria_sp	0.71	0	0	0	0	0	0	0	1	0	0	0	0	0	0	0	0	0	0	0	0	0	0	0	0	0	0	0	0	0	0	0	0	0	0
ee7803161ca5c58fae1a400a9afe2ee5d0a27ea2	#N/A	Metazoa	1	Rotifera	0.99	Eurotatoria	0.99	unclassified_Eurotatoria	0.74	unclassified_Eurotatoria	0.74	unclassified_Eurotatoria	0.74	unclassified_Eurotatoria_sp	0.7	0	0	0	0	0	0	0	0	0	0	0	0	0	0	0	0	0	0	0	0	0	0	0	0	0	0	0	0	0	0	0	0	0	0
1847dd957ac7180f44543ea6acdd611348907b21	#N/A	Metazoa	1	Rotifera	1	Eurotatoria	1	unclassified_Eurotatoria	0.78	unclassified_Eurotatoria	0.77	unclassified_Eurotatoria	0.74	unclassified_Eurotatoria_sp	0.52	0	0	0	0	0	0	0	0	0	0	0	0	0	0	0	0	0	0	0	0	0	0	0	0	0	0	0	0	0	0	0	0	0	0
3fff922a3c1a12253ce4cdf946a75be04a139248	#N/A	Metazoa	1	Rotifera	1	Eurotatoria	1	unclassified_Eurotatoria	0.73	unclassified_Eurotatoria	0.73	unclassified_Eurotatoria	0.73	unclassified_Eurotatoria_sp	0.73	0	0	1	0	0	0	0	0	0	0	0	0	0	0	0	0	0	0	0	0	0	0	0	0	0	0	0	0	0	0	0	0	0	0
594290d010b3713a7c345154234ac4611a58623b	#N/A	Metazoa	1	Rotifera	1	Eurotatoria	1	unclassified_Eurotatoria	0.73	unclassified_Eurotatoria	0.73	unclassified_Eurotatoria	0.73	unclassified_Eurotatoria_sp	0.73	0	0	0	0	0	0	0	0	0	0	0	0	0	0	0	0	0	0	0	0	0	0	0	0	0	0	0	1	0	0	0	0	0	0
5328b7c0ad36d9f042f9791043841b7b15b7b0da	#N/A	Metazoa	1	Rotifera	1	Eurotatoria	1	unclassified_Eurotatoria	0.73	unclassified_Eurotatoria	0.73	unclassified_Eurotatoria	0.73	unclassified_Eurotatoria_sp	0.73	0	0	0	0	0	0	6	1	0	0	0	0	0	0	1	0	0	0	0	0	0	0	0	0	0	0	0	0	0	0	0	0	0	0
124b0be5a826f3e9383fc0aec4188eef0ede37f0	#N/A	Metazoa	1	Rotifera	1	Eurotatoria	1	unclassified_Eurotatoria	0.73	unclassified_Eurotatoria	0.73	unclassified_Eurotatoria	0.73	unclassified_Eurotatoria_sp	0.71	0	0	0	0	0	0	0	0	0	0	0	1	1	0	0	0	0	0	1	0	0	0	0	0	0	0	0	0	0	0	0	0	0	0
149a97ee5277dc26df592398fa7fce44aa2fbfbe	#N/A	Metazoa	1	Rotifera	1	Eurotatoria	1	unclassified_Eurotatoria	0.73	unclassified_Eurotatoria	0.73	unclassified_Eurotatoria	0.73	unclassified_Eurotatoria_sp	0.62	0	0	0	0	0	0	0	0	0	0	0	1	0	0	0	1	0	0	0	0	0	1	0	0	0	0	0	0	0	0	0	0	0	0
02aa88539e6c55c9fa484d8aa80801eadf3b5c89	#N/A	Metazoa	1	Rotifera	1	Eurotatoria	1	unclassified_Eurotatoria	0.73	unclassified_Eurotatoria	0.73	unclassified_Eurotatoria	0.73	unclassified_Eurotatoria_sp	0.59	0	0	0	0	0	0	0	0	0	0	0	0	0	0	0	0	0	0	0	0	0	0	0	0	0	0	0	0	0	0	2	0	0	0
709602d21f2af28f3748ab3a27e4c87c83d54ef1	#N/A	Metazoa	1	Rotifera	1	Eurotatoria	1	unclassified_Eurotatoria	0.72	unclassified_Eurotatoria	0.72	unclassified_Eurotatoria	0.72	unclassified_Eurotatoria_sp	0.72	0	0	1	0	0	0	0	2	0	0	0	0	0	0	0	0	0	0	0	0	0	0	0	0	0	0	0	0	0	0	0	0	0	0
f9e2d0930927b1ff33f31e32a21cf02702fca80b	#N/A	Metazoa	1	Rotifera	1	Eurotatoria	1	unclassified_Eurotatoria	0.72	unclassified_Eurotatoria	0.72	unclassified_Eurotatoria	0.72	unclassified_Eurotatoria_sp	0.72	0	0	0	0	0	0	3	0	0	0	0	0	0	0	0	0	0	0	0	0	0	0	0	0	0	0	0	0	0	0	0	0	0	0
ea4b77f4aee6ef519c636b5225883e78c1adc98f	#N/A	Metazoa	1	Rotifera	1	Eurotatoria	1	unclassified_Eurotatoria	0.72	unclassified_Eurotatoria	0.72	unclassified_Eurotatoria	0.72	unclassified_Eurotatoria_sp	0.71	0	0	0	0	0	0	0	1	0	0	0	0	0	0	0	0	0	0	0	0	0	0	0	0	0	0	0	0	0	0	0	0	0	0
1ae52a3388378d7545c7b5915523ffa2c14bb9a7	#N/A	Metazoa	1	Rotifera	1	Eurotatoria	1	unclassified_Eurotatoria	0.72	unclassified_Eurotatoria	0.72	unclassified_Eurotatoria	0.72	unclassified_Eurotatoria_sp	0.7	0	0	0	0	0	0	0	0	0	0	0	0	0	0	0	0	0	0	0	0	0	0	0	0	0	0	0	0	0	0	0	0	0	0
62fc325a7c1ca85f2044cc741f72848882f899f5	#N/A	Metazoa	1	Rotifera	1	Eurotatoria	1	unclassified_Eurotatoria	0.71	unclassified_Eurotatoria	0.71	unclassified_Eurotatoria	0.71	unclassified_Eurotatoria_sp	0.71	0	0	0	0	0	0	0	0	0	0	0	0	0	4	2	0	0	0	0	0	0	0	0	0	0	0	0	0	0	0	0	0	0	0
3f15f017abb0e684e3f59f45be0d88b4e9ece1ce	#N/A	Metazoa	1	Rotifera	1	Eurotatoria	1	unclassified_Eurotatoria	0.72	unclassified_Eurotatoria	0.71	unclassified_Eurotatoria	0.71	unclassified_Eurotatoria_sp	0.69	1	1	0	0	0	4	0	0	0	1	0	0	0	0	0	0	0	0	0	0	3	0	0	0	0	0	0	0	0	0	0	0	0	0
2efdfe0399bdf5debedd2c7131a8af2b04f72d09	#N/A	Metazoa	1	Rotifera	1	Eurotatoria	1	unclassified_Eurotatoria	0.71	unclassified_Eurotatoria	0.71	unclassified_Eurotatoria	0.71	unclassified_Eurotatoria_sp	0.67	0	0	0	0	0	0	0	0	0	0	0	0	0	0	0	0	0	1	0	0	0	0	0	0	0	0	0	0	0	0	0	0	0	0
ed8b6a34fa607616a0b0b43aa05e07c2601738f8	#N/A	Metazoa	1	Rotifera	1	Eurotatoria	1	unclassified_Eurotatoria	0.7	unclassified_Eurotatoria	0.7	unclassified_Eurotatoria	0.7	unclassified_Eurotatoria_sp	0.7	0	0	0	0	0	0	0	0	0	0	0	1	0	0	0	0	0	0	0	0	0	0	0	0	0	0	0	0	0	0	0	0	0	0
ee29433a3c097b386b9615bb7327bf719205c95f	#N/A	Metazoa	1	Rotifera	1	Eurotatoria	1	unclassified_Eurotatoria	0.7	unclassified_Eurotatoria	0.7	unclassified_Eurotatoria	0.7	unclassified_Eurotatoria_sp	0.7	0	1	0	0	0	0	0	0	0	0	0	0	0	0	0	0	0	0	0	0	0	0	0	0	0	0	0	0	0	0	0	0	0	0
f07d70fa21bca4bea74d261e339b9f1a9ec4027a	#N/A	Metazoa	1	Rotifera	1	Eurotatoria	1	unclassified_Eurotatoria	0.7	unclassified_Eurotatoria	0.7	unclassified_Eurotatoria	0.7	unclassified_Eurotatoria_sp	0.67	0	0	0	0	0	0	0	0	0	0	0	0	0	0	0	0	0	0	0	0	0	0	0	0	0	0	0	0	0	0	0	0	0	0
2761102db565de44e2bd914f55c4380a164be384	#N/A	Metazoa	1	Rotifera	1	Eurotatoria	1	unclassified_Eurotatoria	0.7	unclassified_Eurotatoria	0.7	unclassified_Eurotatoria	0.7	unclassified_Eurotatoria_sp	0.62	0	0	0	0	0	0	0	0	0	0	0	0	0	0	0	23	0	0	0	0	0	0	0	0	0	0	0	0	0	0	0	0	0	0
249c64d0b901bbcdb08dd75798356e5465ccb10e	#N/A	Metazoa	0.95	Rotifera	0.85	Eurotatoria	0.85	unclassified_Eurotatoria	0.79	unclassified_Eurotatoria	0.78	unclassified_Eurotatoria	0.7	unclassified_Eurotatoria_sp	0.61	0	0	0	0	0	0	0	0	0	0	0	0	0	0	0	1	0	0	0	0	0	0	0	0	0	0	0	0	0	0	0	0	0	0
2176a282827efabf2eeb379e7a7a57efbdf52217	#N/A	Metazoa	1	Rotifera	1	Eurotatoria	1	unclassified_Eurotatoria	0.7	unclassified_Eurotatoria	0.7	unclassified_Eurotatoria	0.7	unclassified_Eurotatoria_sp	0.45	1	0	0	0	0	0	0	0	0	0	0	0	0	0	0	0	0	0	0	0	0	0	0	0	0	0	0	0	0	0	0	0	0	0
e02964a1ce9be15ffb2377ba1a74f3be7bb6fb81	#N/A	Metazoa	1	Rotifera	1	Eurotatoria	1	unclassified_Eurotatoria	0.74	unclassified_Eurotatoria	0.7	unclassified_Eurotatoria	0.69	unclassified_Eurotatoria_sp	0.67	0	0	0	0	0	0	0	0	0	0	0	0	0	0	0	0	0	0	1	0	0	0	0	0	0	0	0	0	0	0	0	0	0	0
e4367c3f6e70458dceff9856bcab83f0d71f2258	#N/A	Metazoa	1	Rotifera	1	Eurotatoria	1	unclassified_Eurotatoria	0.7	unclassified_Eurotatoria	0.7	unclassified_Eurotatoria	0.69	unclassified_Eurotatoria_sp	0.67	0	0	0	0	0	0	0	0	0	0	0	0	0	0	0	0	0	0	0	1	0	0	0	0	0	0	0	0	0	0	0	0	0	0
d2c2adadfe607de8f8645fb1a4f71f0543fa8773	#N/A	Metazoa	1	Rotifera	1	Eurotatoria	1	unclassified_Eurotatoria	0.69	unclassified_Eurotatoria	0.69	unclassified_Eurotatoria	0.69	unclassified_Eurotatoria_sp	0.65	0	3	1	0	0	0	0	0	0	0	0	0	0	0	0	0	0	0	0	0	0	0	0	0	0	0	0	0	0	0	2	0	0	0
9cf081da52a7540d3c827c0b5694cac3a46513e8	#N/A	Metazoa	1	Rotifera	1	Eurotatoria	1	unclassified_Eurotatoria	0.69	unclassified_Eurotatoria	0.69	unclassified_Eurotatoria	0.69	unclassified_Eurotatoria_sp	0.6	0	0	0	0	0	0	0	0	0	0	0	0	0	1	1	0	0	0	0	0	0	0	0	0	0	0	0	0	0	0	0	0	0	0
45e4181707327bb063e5870921c1ca907008a289	#N/A	Metazoa	1	Rotifera	1	Eurotatoria	1	unclassified_Eurotatoria	0.71	unclassified_Eurotatoria	0.69	unclassified_Eurotatoria	0.68	unclassified_Eurotatoria_sp	0.68	0	0	0	1	0	0	0	0	0	0	0	0	0	0	0	0	0	0	0	0	0	0	0	0	0	0	0	0	0	0	0	0	0	0
61e388b53f02d9d9859b7da74124289281438bfb	#N/A	Metazoa	1	Rotifera	1	Eurotatoria	1	unclassified_Eurotatoria	0.68	unclassified_Eurotatoria	0.68	unclassified_Eurotatoria	0.68	unclassified_Eurotatoria_sp	0.68	0	0	0	0	0	0	0	2	0	0	0	0	0	0	0	0	0	0	0	0	0	0	0	0	0	0	0	0	0	0	0	0	0	0
ad8aaaa1af02200d1b8e4f46f50de5d16fa5e472	#N/A	Metazoa	1	Rotifera	1	Eurotatoria	1	unclassified_Eurotatoria	0.68	unclassified_Eurotatoria	0.68	unclassified_Eurotatoria	0.68	unclassified_Eurotatoria_sp	0.67	0	0	1	0	0	0	0	0	0	0	0	0	0	0	0	0	0	0	0	0	0	0	0	0	0	0	0	0	0	0	0	0	0	0
159192c0ce332e73d1cacbb9e6ad0562e04d8ea9	#N/A	Metazoa	1	Rotifera	1	Eurotatoria	1	unclassified_Eurotatoria	0.68	unclassified_Eurotatoria	0.68	unclassified_Eurotatoria	0.68	unclassified_Eurotatoria_sp	0.67	9	20	23	0	0	8	0	0	0	0	1	0	0	0	0	0	0	0	0	0	0	0	0	0	0	0	0	0	0	0	0	2	0	0
3d706a8571a016b789c07f4ac6a727751d952e26	#N/A	Metazoa	1	Rotifera	1	Eurotatoria	1	unclassified_Eurotatoria	0.73	unclassified_Eurotatoria	0.68	unclassified_Eurotatoria	0.68	unclassified_Eurotatoria_sp	0.66	0	0	1	0	0	0	0	0	0	0	0	0	0	0	0	0	0	0	0	0	0	0	0	0	0	0	0	0	0	0	0	0	0	0
9f2fc24c27d4773e9c2bbe042c0011001b988aba	#N/A	Metazoa	1	Rotifera	1	Eurotatoria	1	unclassified_Eurotatoria	0.68	unclassified_Eurotatoria	0.68	unclassified_Eurotatoria	0.68	unclassified_Eurotatoria_sp	0.63	0	0	0	0	0	0	0	0	0	0	0	0	1	0	0	0	0	0	0	0	0	0	0	0	0	0	0	0	0	0	0	0	0	0
2ff4b2d717a3ed77552c0755f34de70afa08e5b3	#N/A	Metazoa	1	Rotifera	1	Eurotatoria	1	unclassified_Eurotatoria	0.67	unclassified_Eurotatoria	0.67	unclassified_Eurotatoria	0.67	unclassified_Eurotatoria_sp	0.67	0	0	0	0	0	0	0	0	0	0	0	0	0	0	0	0	0	0	0	0	0	0	0	0	0	0	0	0	0	0	0	0	0	0
44ca7f3b5911c18a36648fc71f69628580833630	#N/A	Metazoa	1	Rotifera	1	Eurotatoria	1	unclassified_Eurotatoria	0.67	unclassified_Eurotatoria	0.67	unclassified_Eurotatoria	0.67	unclassified_Eurotatoria_sp	0.67	0	0	0	0	0	0	0	1	0	0	0	0	0	0	0	0	0	0	0	0	0	0	0	0	0	0	0	0	0	0	0	0	0	0
a0350816577823b6b5f158c7cf4ba5f2999bea23	#N/A	Metazoa	1	Rotifera	1	Eurotatoria	1	unclassified_Eurotatoria	0.67	unclassified_Eurotatoria	0.67	unclassified_Eurotatoria	0.67	unclassified_Eurotatoria_sp	0.67	0	0	0	0	0	1	0	0	0	0	0	0	0	0	0	0	0	0	0	0	0	0	0	0	0	0	0	0	0	0	0	0	0	0
d6c3d5dfd5b9e5002257f06472db6b4e99a1e93b	#N/A	Metazoa	1	Rotifera	1	Eurotatoria	1	unclassified_Eurotatoria	0.67	unclassified_Eurotatoria	0.67	unclassified_Eurotatoria	0.67	unclassified_Eurotatoria_sp	0.67	0	0	0	0	0	0	0	0	0	0	0	0	0	0	0	0	9	0	0	0	0	0	0	0	0	0	0	0	0	0	0	0	0	0
3492af6284f7d7304fd70e7902cdaa44d4b556f7	#N/A	Metazoa	1	Rotifera	1	Eurotatoria	1	unclassified_Eurotatoria	0.67	unclassified_Eurotatoria	0.67	unclassified_Eurotatoria	0.67	unclassified_Eurotatoria_sp	0.67	1	0	0	0	6	0	0	0	0	0	0	0	0	0	0	0	0	0	0	0	0	0	0	0	0	0	0	0	0	0	0	0	0	3
5a00705672f9c5507bdbf05fe2298f204a056d25	#N/A	Metazoa	1	Rotifera	1	Eurotatoria	1	unclassified_Eurotatoria	0.67	unclassified_Eurotatoria	0.67	unclassified_Eurotatoria	0.67	unclassified_Eurotatoria_sp	0.67	0	0	0	0	0	0	0	1	0	0	0	0	0	0	0	0	0	0	0	0	0	0	0	0	0	0	0	0	0	0	0	0	0	0
8c8d9b86223b0a33a36a3e9a23b39c6c72144307	#N/A	Metazoa	1	Rotifera	1	Eurotatoria	1	unclassified_Eurotatoria	0.67	unclassified_Eurotatoria	0.67	unclassified_Eurotatoria	0.67	unclassified_Eurotatoria_sp	0.59	0	0	0	0	0	0	0	0	0	1	0	2	2	0	0	0	0	0	0	0	0	0	0	0	0	0	0	0	0	0	0	0	0	0
e9da8f458fcff09367bebfab1aca92d9fc0eda25	#N/A	Metazoa	1	Rotifera	1	Eurotatoria	1	unclassified_Eurotatoria	0.67	unclassified_Eurotatoria	0.67	unclassified_Eurotatoria	0.67	unclassified_Eurotatoria_sp	0.56	0	0	0	0	1	0	0	0	0	0	0	0	1	0	1	0	0	0	1	1	0	0	0	0	0	0	0	0	0	0	0	0	0	0
ce884743ed2278678a9ad69d9f35509c4af98b2b	#N/A	Metazoa	1	Rotifera	1	Eurotatoria	1	unclassified_Eurotatoria	0.66	unclassified_Eurotatoria	0.66	unclassified_Eurotatoria	0.66	unclassified_Eurotatoria_sp	0.66	0	0	0	0	0	0	0	0	0	0	0	0	0	0	0	0	0	0	0	0	0	0	0	0	0	0	0	0	0	0	0	0	0	0
41828fbb6ed26930b4a0fbd49d30bcb0c477794d	#N/A	Metazoa	1	Rotifera	1	Eurotatoria	1	unclassified_Eurotatoria	0.66	unclassified_Eurotatoria	0.66	unclassified_Eurotatoria	0.66	unclassified_Eurotatoria_sp	0.65	0	0	0	0	0	0	0	0	0	0	0	8	0	0	0	0	0	0	0	0	0	0	0	0	2	0	0	0	0	0	0	0	0	0
e7b5623f67b24396f737e41b16e3165bb28d40cd	#N/A	Metazoa	1	Rotifera	1	Eurotatoria	1	unclassified_Eurotatoria	0.66	unclassified_Eurotatoria	0.66	unclassified_Eurotatoria	0.66	unclassified_Eurotatoria_sp	0.65	0	0	33	0	0	0	0	0	0	0	0	0	0	0	0	0	0	0	0	0	0	0	0	0	0	0	0	0	0	0	2	47	0	0
3ed7b6539f7d3cbc4c06e2faf9d2dfc8a7fc1ce1	#N/A	Metazoa	1	Rotifera	0.99	Eurotatoria	0.99	unclassified_Eurotatoria	0.66	unclassified_Eurotatoria	0.66	unclassified_Eurotatoria	0.66	unclassified_Eurotatoria_sp	0.63	0	0	0	0	0	0	0	1	0	0	0	0	0	0	0	0	0	0	0	0	0	0	0	0	0	0	0	0	0	0	0	0	0	0
14acc5d5e304857f58eb238cac6d0a52ba023e60	#N/A	Metazoa	1	Rotifera	1	Eurotatoria	1	unclassified_Eurotatoria	0.65	unclassified_Eurotatoria	0.65	unclassified_Eurotatoria	0.65	unclassified_Eurotatoria_sp	0.65	0	0	0	0	0	0	0	0	0	0	0	1	0	0	0	0	0	0	0	0	0	0	0	0	0	0	0	0	0	0	0	0	0	0
78e7c7b0e13767c241b3b1a8266b7e4fba99f182	#N/A	Metazoa	1	Rotifera	1	Eurotatoria	1	unclassified_Eurotatoria	0.65	unclassified_Eurotatoria	0.65	unclassified_Eurotatoria	0.65	unclassified_Eurotatoria_sp	0.65	0	0	0	0	0	0	0	0	0	0	0	1	0	0	0	0	0	0	0	0	0	0	0	0	0	0	0	0	0	0	0	0	0	0
ace2881de214202a66397603daa1cf18b6de152b	#N/A	Metazoa	1	Rotifera	1	Eurotatoria	1	unclassified_Eurotatoria	0.65	unclassified_Eurotatoria	0.65	unclassified_Eurotatoria	0.65	unclassified_Eurotatoria_sp	0.64	0	0	1	0	0	0	0	0	0	0	0	0	0	0	0	0	0	0	0	0	0	0	0	0	0	0	0	0	0	0	0	0	0	0
3f1d72ed25c6e4cb49e40b5a371773b2d247f448	#N/A	Metazoa	1	Rotifera	1	Eurotatoria	1	unclassified_Eurotatoria	0.65	unclassified_Eurotatoria	0.65	unclassified_Eurotatoria	0.65	unclassified_Eurotatoria_sp	0.62	0	0	0	0	0	0	0	0	0	0	0	0	0	0	0	0	0	0	0	0	0	0	0	0	0	0	0	0	0	0	0	0	0	0
18bf59cc1a15de8aba0608a35175843626ded5a1	#N/A	Metazoa	1	Rotifera	1	Eurotatoria	1	unclassified_Eurotatoria	0.65	unclassified_Eurotatoria	0.65	unclassified_Eurotatoria	0.65	unclassified_Eurotatoria_sp	0.6	0	0	0	0	0	0	0	0	0	0	0	0	0	0	0	0	0	0	0	0	0	0	0	0	0	1	0	0	0	0	0	0	0	0
af586a85ee2af5d457c176d47083757e225c0e9c	#N/A	Metazoa	1	Rotifera	1	Eurotatoria	1	unclassified_Eurotatoria	0.64	unclassified_Eurotatoria	0.64	unclassified_Eurotatoria	0.64	unclassified_Eurotatoria_sp	0.61	0	0	0	0	0	0	0	0	0	0	0	0	0	0	0	0	0	0	0	1	0	0	0	0	0	0	0	0	0	0	0	0	0	0
fdc0cb8f58750ea6e08b12fed99fcc136a48a398	#N/A	Metazoa	1	Rotifera	1	Eurotatoria	1	unclassified_Eurotatoria	0.63	unclassified_Eurotatoria	0.63	unclassified_Eurotatoria	0.63	unclassified_Eurotatoria_sp	0.63	0	0	3	0	0	0	0	0	0	0	2	0	1	0	0	0	0	0	0	0	0	0	0	0	0	0	0	0	0	0	0	5	0	0
20f78a15e4927631059337247ff86502218305a5	#N/A	Metazoa	1	Rotifera	1	Eurotatoria	1	unclassified_Eurotatoria	0.63	unclassified_Eurotatoria	0.63	unclassified_Eurotatoria	0.63	unclassified_Eurotatoria_sp	0.62	0	0	0	0	0	0	0	0	0	0	0	0	0	0	0	0	0	0	0	0	0	0	0	0	0	0	0	0	0	0	0	0	0	0
1904aae8a5ed18b6ffda655146e337f80e1ea2e8	#N/A	Metazoa	1	Rotifera	1	Eurotatoria	1	unclassified_Eurotatoria	0.63	unclassified_Eurotatoria	0.63	unclassified_Eurotatoria	0.63	unclassified_Eurotatoria_sp	0.61	0	0	0	0	0	0	0	0	0	0	0	0	0	0	0	0	0	0	0	0	0	0	0	0	0	0	0	0	0	0	0	0	0	0
17cfdec1142c22e38ef225dd1742a2fa49666b52	#N/A	Metazoa	1	Rotifera	1	Eurotatoria	1	unclassified_Eurotatoria	0.63	unclassified_Eurotatoria	0.63	unclassified_Eurotatoria	0.63	unclassified_Eurotatoria_sp	0.6	0	0	0	0	0	0	0	0	0	0	0	0	0	0	0	0	0	0	0	0	0	0	0	0	0	0	0	0	0	0	0	0	0	0
a0c99905375c3642743879b42faebdf2e20e73bd	#N/A	Metazoa	1	Rotifera	1	Eurotatoria	1	unclassified_Eurotatoria	0.63	unclassified_Eurotatoria	0.63	unclassified_Eurotatoria	0.63	unclassified_Eurotatoria_sp	0.52	1	0	0	0	0	0	0	0	0	0	1	9	4	3	1	8	6	19	5	3	1	6	20	0	0	0	0	0	0	0	0	0	0	0
a88f5dc647da6ef94559bb755efa055841ce90f5	#N/A	Metazoa	1	Rotifera	1	Eurotatoria	1	unclassified_Eurotatoria	0.72	unclassified_Eurotatoria	0.71	unclassified_Eurotatoria	0.63	unclassified_Eurotatoria_sp	0.48	0	0	0	0	0	0	0	0	0	0	0	0	0	0	0	0	0	0	0	0	0	0	0	0	0	0	0	0	0	1	0	0	0	0
aaed082ff4fef4e38fd54d95346c9eccc00c8a5e	#N/A	Metazoa	1	Rotifera	1	Eurotatoria	1	unclassified_Eurotatoria	0.62	unclassified_Eurotatoria	0.62	unclassified_Eurotatoria	0.62	unclassified_Eurotatoria_sp	0.62	0	0	1	0	0	5	0	0	0	0	0	0	0	0	0	0	0	0	0	0	0	0	0	0	0	0	0	0	0	0	0	0	0	0
cd65a22dd7dc64b00dc1baa958fbc52a173be56e	#N/A	Metazoa	1	Rotifera	1	Eurotatoria	1	unclassified_Eurotatoria	0.62	unclassified_Eurotatoria	0.62	unclassified_Eurotatoria	0.62	unclassified_Eurotatoria_sp	0.56	0	0	0	0	0	0	0	0	0	0	0	0	0	0	0	0	0	4	0	11	1	0	0	0	0	0	0	0	0	0	0	0	0	0
1af555c3324ac2e5f8f5e69e971a2a7c34f3dbfc	#N/A	Metazoa	1	Rotifera	1	Eurotatoria	1	unclassified_Eurotatoria	0.62	unclassified_Eurotatoria	0.62	unclassified_Eurotatoria	0.62	unclassified_Eurotatoria_sp	0.55	0	0	0	0	0	0	0	0	0	0	0	0	0	0	0	0	0	0	0	0	0	0	0	0	0	0	0	0	0	0	0	0	0	1
993fb40636a0d491776f5426549e2ee5cd57170d	#N/A	Metazoa	1	Rotifera	1	Eurotatoria	1	unclassified_Eurotatoria	0.62	unclassified_Eurotatoria	0.62	unclassified_Eurotatoria	0.62	unclassified_Eurotatoria_sp	0.39	0	0	0	0	0	0	0	0	0	0	0	0	0	0	0	0	0	0	0	0	0	0	0	0	0	0	0	0	0	0	0	0	0	0
2c79f2cf103531291c4ab62d083551c5e3ac1efc	#N/A	Metazoa	1	Rotifera	1	Eurotatoria	1	unclassified_Eurotatoria	0.61	unclassified_Eurotatoria	0.61	unclassified_Eurotatoria	0.61	unclassified_Eurotatoria_sp	0.61	0	0	0	1	0	0	0	0	0	0	0	0	0	0	0	0	0	0	0	0	0	0	0	0	0	0	0	0	0	0	0	0	0	0
9993fcc72d96bed26b896131134b74c49137d05c	#N/A	Metazoa	1	Rotifera	1	Eurotatoria	1	unclassified_Eurotatoria	0.61	unclassified_Eurotatoria	0.61	unclassified_Eurotatoria	0.61	unclassified_Eurotatoria_sp	0.61	0	0	0	0	0	0	0	1	0	0	0	0	0	0	0	0	0	0	0	0	0	0	0	0	0	0	0	0	0	0	0	0	0	0
f1be3e7e098d5615e1e781f1b6bee7b87635a29e	#N/A	Metazoa	1	Rotifera	1	Eurotatoria	1	unclassified_Eurotatoria	0.61	unclassified_Eurotatoria	0.61	unclassified_Eurotatoria	0.61	unclassified_Eurotatoria_sp	0.6	0	0	0	0	0	0	0	0	0	0	1	0	0	0	0	0	0	0	0	0	0	0	0	0	0	0	0	0	0	0	0	0	0	0
456a0a1b832c377bd253644a88ea85a0415fde15	#N/A	Metazoa	0.99	Rotifera	0.84	Eurotatoria	0.84	unclassified_Eurotatoria	0.72	unclassified_Eurotatoria	0.67	unclassified_Eurotatoria	0.61	unclassified_Eurotatoria_sp	0.59	0	0	0	0	0	0	0	0	0	0	0	0	0	0	0	0	0	0	0	0	0	0	0	0	0	0	0	0	0	0	0	0	0	0
0c54356af9b5636da2fca1a9953ba6c0d640793b	#N/A	Metazoa	1	Rotifera	1	Eurotatoria	1	unclassified_Eurotatoria	0.61	unclassified_Eurotatoria	0.61	unclassified_Eurotatoria	0.61	unclassified_Eurotatoria_sp	0.58	0	0	0	0	0	0	0	0	0	0	0	0	2	0	0	0	0	0	0	0	0	0	0	0	0	0	0	0	0	0	0	0	0	0
5aa6ba44dcd08e587e27c3d11499b2a6f0b9ac5c	#N/A	Metazoa	1	Rotifera	1	Eurotatoria	1	unclassified_Eurotatoria	0.61	unclassified_Eurotatoria	0.61	unclassified_Eurotatoria	0.61	unclassified_Eurotatoria_sp	0.56	0	0	0	1	0	0	0	0	0	0	0	0	0	0	0	0	0	0	0	0	0	0	0	0	0	0	0	0	0	0	0	0	0	0
07c29940883a819f16cf8d266767f8332a07eb37	#N/A	Metazoa	1	Rotifera	1	Eurotatoria	1	unclassified_Eurotatoria	0.6	unclassified_Eurotatoria	0.6	unclassified_Eurotatoria	0.6	unclassified_Eurotatoria_sp	0.6	0	0	0	0	0	0	0	0	0	0	0	0	0	0	0	0	0	0	0	0	0	0	0	0	0	0	0	0	0	0	0	0	0	0
08428e3dace0089aca2faae37d3b9eda69e3c0cf	#N/A	Metazoa	1	Rotifera	1	Eurotatoria	1	unclassified_Eurotatoria	0.6	unclassified_Eurotatoria	0.6	unclassified_Eurotatoria	0.6	unclassified_Eurotatoria_sp	0.59	0	0	0	0	0	0	1	0	0	0	0	0	0	0	0	0	0	0	0	0	0	0	0	0	0	0	0	0	0	0	0	0	0	0
d0350f8cc3f6a462ff9ce609b97e3648f27ab7c0	#N/A	Metazoa	1	Rotifera	1	Eurotatoria	1	unclassified_Eurotatoria	0.6	unclassified_Eurotatoria	0.6	unclassified_Eurotatoria	0.6	unclassified_Eurotatoria_sp	0.55	0	0	0	0	0	0	0	0	0	0	0	0	0	0	0	0	0	0	0	0	0	0	2	0	0	0	0	0	0	0	0	0	0	0
99696249c6abb497e6dd14b02a6f0432a3ce93a4	#N/A	Metazoa	0.94	Rotifera	0.8	Eurotatoria	0.8	unclassified_Eurotatoria	0.78	unclassified_Eurotatoria	0.71	unclassified_Eurotatoria	0.6	unclassified_Eurotatoria_sp	0.51	1	0	0	0	0	0	0	0	0	0	0	0	0	0	0	0	0	0	0	0	0	0	0	0	0	0	0	0	0	0	0	0	0	0
04fb061f4c1134e322c48da1c766f19736f0d454	#N/A	Metazoa	1	Rotifera	1	Eurotatoria	1	unclassified_Eurotatoria	0.66	unclassified_Eurotatoria	0.65	unclassified_Eurotatoria	0.6	unclassified_Eurotatoria_sp	0.5	0	0	0	0	0	0	0	0	0	0	0	0	0	0	0	0	0	1	0	0	0	0	0	0	0	0	0	0	0	1	0	0	0	0
a732f3bd481536fa9b7e3370acbe960c3363cf33	#N/A	Metazoa	1	Rotifera	1	Eurotatoria	1	unclassified_Eurotatoria	0.6	unclassified_Eurotatoria	0.6	unclassified_Eurotatoria	0.6	unclassified_Eurotatoria_sp	0.49	0	0	0	0	0	0	0	0	0	1	0	0	0	0	0	0	0	0	0	0	0	0	0	0	0	0	0	0	0	0	0	0	0	0
6074399e929e1ef8ca6755f8ad130645ab139bc4	#N/A	Metazoa	1	Rotifera	1	Eurotatoria	1	unclassified_Eurotatoria	0.59	unclassified_Eurotatoria	0.59	unclassified_Eurotatoria	0.59	unclassified_Eurotatoria_sp	0.59	0	0	0	0	0	0	0	0	0	0	0	0	0	1	0	0	0	0	0	0	0	0	0	0	0	0	0	0	0	0	0	0	0	0
d4f08fd0f6dc849fbc1e3b549f8009478737ad6d	#N/A	Metazoa	1	Rotifera	1	Eurotatoria	1	unclassified_Eurotatoria	0.59	unclassified_Eurotatoria	0.59	unclassified_Eurotatoria	0.59	unclassified_Eurotatoria_sp	0.59	0	0	0	0	0	0	0	0	0	0	0	0	0	0	0	0	0	0	0	0	0	0	0	0	0	0	0	0	0	0	0	0	0	0
dcab3e2aa8a3eea74849e2c3ade2ee6da2b361e6	#N/A	Metazoa	1	Rotifera	1	Eurotatoria	1	unclassified_Eurotatoria	0.59	unclassified_Eurotatoria	0.59	unclassified_Eurotatoria	0.59	unclassified_Eurotatoria_sp	0.59	0	0	0	0	0	0	0	0	0	0	0	0	0	0	0	0	0	0	0	0	0	0	1	0	0	0	0	0	0	0	0	0	0	0
e675a8a0cbc76d3cee946c7e7d14f454b3c29a0d	#N/A	Metazoa	1	Rotifera	1	Eurotatoria	1	unclassified_Eurotatoria	0.59	unclassified_Eurotatoria	0.59	unclassified_Eurotatoria	0.59	unclassified_Eurotatoria_sp	0.59	1	0	0	0	0	0	0	0	0	0	0	0	0	0	0	0	0	0	0	0	0	0	0	0	0	0	0	0	0	0	0	0	0	0
47797d15c9407f481fbb1b46831ddd8997ddccf2	#N/A	Metazoa	1	Rotifera	1	Eurotatoria	1	unclassified_Eurotatoria	0.59	unclassified_Eurotatoria	0.59	unclassified_Eurotatoria	0.59	unclassified_Eurotatoria_sp	0.59	0	0	0	0	0	0	0	0	0	0	0	0	0	0	0	0	0	0	0	0	0	0	0	0	2	0	0	0	0	0	0	0	0	0
f7c3887a6c0c61ad65f9c659910a4b293009cdf4	#N/A	Metazoa	1	Rotifera	1	Eurotatoria	1	unclassified_Eurotatoria	0.59	unclassified_Eurotatoria	0.59	unclassified_Eurotatoria	0.59	unclassified_Eurotatoria_sp	0.59	0	0	0	0	0	0	0	0	1	0	0	0	0	0	9	0	0	0	0	0	0	0	0	0	0	0	0	0	0	0	0	0	0	0
b3f0d7e8818e33567d88754235c7fc6973d9dc2f	#N/A	Metazoa	1	Rotifera	1	Eurotatoria	1	unclassified_Eurotatoria	0.59	unclassified_Eurotatoria	0.59	unclassified_Eurotatoria	0.59	unclassified_Eurotatoria_sp	0.58	0	0	0	0	0	0	0	0	0	0	0	0	0	0	0	0	0	0	0	0	0	0	0	0	0	0	0	0	0	1	0	0	0	0
c9e6f5c61f34d348c552a6132c5e5e19eb1a5653	#N/A	Metazoa	1	Rotifera	1	Eurotatoria	1	unclassified_Eurotatoria	0.59	unclassified_Eurotatoria	0.59	unclassified_Eurotatoria	0.59	unclassified_Eurotatoria_sp	0.58	0	0	0	0	0	0	0	0	0	0	0	0	0	0	0	1	0	0	0	0	0	0	0	0	0	0	0	0	0	0	0	0	0	0
a86252d1470a304e153be41815f6b87b9ff50667	#N/A	Metazoa	1	Rotifera	1	Eurotatoria	1	unclassified_Eurotatoria	0.59	unclassified_Eurotatoria	0.59	unclassified_Eurotatoria	0.59	unclassified_Eurotatoria_sp	0.58	0	0	0	10	0	0	0	0	0	0	0	0	0	0	0	0	0	0	0	0	0	0	0	0	0	0	0	0	0	0	0	0	0	0
8e9c184e2860b2b94871d09efaff9f05f988d34e	#N/A	Metazoa	1	Rotifera	1	Eurotatoria	1	unclassified_Eurotatoria	0.59	unclassified_Eurotatoria	0.59	unclassified_Eurotatoria	0.59	unclassified_Eurotatoria_sp	0.57	0	0	0	0	0	0	0	0	0	0	0	0	0	0	0	0	0	0	0	0	0	0	0	0	0	0	0	0	0	0	0	0	0	0
7ed83cde8bfd673b518e827b71e1b836855aa91c	#N/A	Metazoa	1	Rotifera	1	Eurotatoria	1	unclassified_Eurotatoria	0.59	unclassified_Eurotatoria	0.59	unclassified_Eurotatoria	0.59	unclassified_Eurotatoria_sp	0.56	0	0	0	0	0	0	0	0	0	0	0	0	0	0	0	0	0	0	0	0	0	0	0	0	0	0	0	1	0	0	0	0	0	0
ab82028c45993a5b9a9ed126188dd3ca391757f8	#N/A	Metazoa	1	Rotifera	0.99	Eurotatoria	0.99	unclassified_Eurotatoria	0.73	unclassified_Eurotatoria	0.65	unclassified_Eurotatoria	0.59	unclassified_Eurotatoria_sp	0.49	0	0	0	0	0	0	0	1	0	0	0	0	0	0	0	0	0	0	0	0	0	0	0	0	0	0	0	0	0	0	0	0	0	0
179e092797f0ee6f123b3666af5819f24a60b5ea	#N/A	Metazoa	1	Rotifera	0.98	Eurotatoria	0.98	unclassified_Eurotatoria	0.59	unclassified_Eurotatoria	0.59	unclassified_Eurotatoria	0.59	unclassified_Eurotatoria_sp	0.22	0	0	0	0	0	1	0	0	0	0	0	0	0	0	0	0	0	0	0	0	0	0	0	0	0	0	0	0	0	0	0	0	0	0
2d19e3c05076c9a2a18e463476a7b213ed782860	#N/A	Metazoa	1	Rotifera	1	Eurotatoria	1	unclassified_Eurotatoria	0.58	unclassified_Eurotatoria	0.58	unclassified_Eurotatoria	0.58	unclassified_Eurotatoria_sp	0.58	0	0	0	0	0	0	0	0	0	0	0	0	1	0	0	0	0	0	0	0	0	0	0	0	0	0	0	0	0	0	0	0	0	0
83c9ed7a6af5fae91e6bdef10cad8f43946d95ad	#N/A	Metazoa	1	Rotifera	1	Eurotatoria	1	unclassified_Eurotatoria	0.58	unclassified_Eurotatoria	0.58	unclassified_Eurotatoria	0.58	unclassified_Eurotatoria_sp	0.57	0	0	0	0	0	0	0	0	0	0	0	0	0	0	0	1	0	0	0	0	0	0	0	0	0	0	0	0	0	0	0	0	0	0
2867eafb12361f9d3391692cb86072095dbddad9	#N/A	Metazoa	1	Rotifera	1	Eurotatoria	1	unclassified_Eurotatoria	0.58	unclassified_Eurotatoria	0.58	unclassified_Eurotatoria	0.58	unclassified_Eurotatoria_sp	0.57	7	0	0	0	0	0	0	0	3	0	0	0	0	0	0	10	7	0	0	0	5	0	0	0	0	0	0	0	0	0	0	0	0	0
0c959ea2780bfd886c20f79f9541dda90a9e3a93	#N/A	Metazoa	1	Rotifera	0.99	Eurotatoria	0.99	unclassified_Eurotatoria	0.76	unclassified_Eurotatoria	0.69	unclassified_Eurotatoria	0.58	unclassified_Eurotatoria_sp	0.56	0	0	0	0	0	0	0	0	0	0	0	0	0	0	0	0	0	0	0	0	0	0	0	0	0	0	0	0	0	0	0	1	0	0
5eb02db298cc20e1abe87fa476940dd99d85e3e6	#N/A	Metazoa	1	Rotifera	1	Eurotatoria	1	unclassified_Eurotatoria	0.58	unclassified_Eurotatoria	0.58	unclassified_Eurotatoria	0.58	unclassified_Eurotatoria_sp	0.55	0	0	0	0	0	1	0	0	0	0	0	0	0	0	0	0	0	0	0	0	0	0	0	0	0	0	0	0	0	0	0	0	0	0
ab45161ad4c9c57f5fccbb86b619c72ceb7b85ea	#N/A	Metazoa	1	Rotifera	1	Eurotatoria	1	unclassified_Eurotatoria	0.58	unclassified_Eurotatoria	0.58	unclassified_Eurotatoria	0.58	unclassified_Eurotatoria_sp	0.54	0	0	0	0	0	0	0	0	0	0	0	0	0	0	0	0	0	0	0	0	0	0	0	0	0	0	0	0	0	0	0	0	0	0
dfc1fb4e0e0f416a0326f094b5907e121668cbca	#N/A	Metazoa	1	Rotifera	1	Eurotatoria	1	unclassified_Eurotatoria	0.58	unclassified_Eurotatoria	0.58	unclassified_Eurotatoria	0.58	unclassified_Eurotatoria_sp	0.47	0	0	0	1	0	0	0	0	0	0	0	0	0	0	0	0	0	0	0	0	0	0	0	0	0	0	0	0	0	0	0	0	0	0
9d8cb2e476df3e7e58561cc03fc5cdf28670c209	#N/A	Metazoa	1	Rotifera	1	Eurotatoria	1	unclassified_Eurotatoria	0.57	unclassified_Eurotatoria	0.57	unclassified_Eurotatoria	0.57	unclassified_Eurotatoria_sp	0.57	0	0	1	0	0	0	0	0	0	0	0	0	0	0	0	0	0	0	0	0	0	0	0	0	0	0	0	0	0	0	0	0	0	0
ceef7664d81b2cbcb7f5389a73fe820f7e7c11d8	#N/A	Metazoa	1	Rotifera	1	Eurotatoria	1	unclassified_Eurotatoria	0.57	unclassified_Eurotatoria	0.57	unclassified_Eurotatoria	0.57	unclassified_Eurotatoria_sp	0.57	0	0	1	0	0	0	0	0	0	0	0	0	0	0	0	0	0	0	0	0	0	0	0	0	0	0	0	0	0	0	0	0	0	0
ec9b694cc45348be7eea931e8b78be0e3447f199	#N/A	Metazoa	1	Rotifera	1	Eurotatoria	1	unclassified_Eurotatoria	0.57	unclassified_Eurotatoria	0.57	unclassified_Eurotatoria	0.57	unclassified_Eurotatoria_sp	0.57	0	0	0	0	0	0	0	0	0	0	0	0	0	0	0	0	0	0	0	0	1	0	0	0	0	0	0	0	0	0	0	0	0	0
3c5502b09a358bd6bd58979f2c959bee89cb6c46	#N/A	Metazoa	1	Rotifera	1	Eurotatoria	1	unclassified_Eurotatoria	0.57	unclassified_Eurotatoria	0.57	unclassified_Eurotatoria	0.57	unclassified_Eurotatoria_sp	0.55	0	0	0	0	0	0	0	0	0	0	1	0	0	0	0	0	0	0	0	0	0	0	0	0	0	0	0	0	0	0	0	0	0	0
51dfe6e9a7f79903e74849fe5ac76d7cda278274	#N/A	Metazoa	1	Rotifera	0.98	Eurotatoria	0.98	unclassified_Eurotatoria	0.79	unclassified_Eurotatoria	0.63	unclassified_Eurotatoria	0.57	unclassified_Eurotatoria_sp	0.54	0	0	0	0	0	0	0	0	0	0	0	0	0	0	0	0	0	1	0	0	0	0	0	0	0	0	0	0	0	0	0	0	0	0
e2049b391ab1fd607e533d2d0105aa9d8867439c	#N/A	Metazoa	1	Rotifera	0.99	Eurotatoria	0.99	unclassified_Eurotatoria	0.57	unclassified_Eurotatoria	0.57	unclassified_Eurotatoria	0.57	unclassified_Eurotatoria_sp	0.54	0	0	0	0	0	0	0	0	0	0	0	0	0	0	0	0	0	0	0	0	0	0	0	0	0	0	0	0	0	0	0	0	0	0
24e0e157e2f41cfda1351dd85e5ae9e9c51c84e2	#N/A	Metazoa	1	Rotifera	1	Eurotatoria	1	unclassified_Eurotatoria	0.73	unclassified_Eurotatoria	0.6	unclassified_Eurotatoria	0.57	unclassified_Eurotatoria_sp	0.53	0	0	1	0	0	0	0	0	0	0	0	0	0	0	0	0	0	0	0	0	0	0	0	0	0	0	0	0	0	0	0	0	0	0
0da64850326660c6aaa220d27fe943c2421c5e8e	#N/A	Metazoa	1	Rotifera	1	Eurotatoria	1	unclassified_Eurotatoria	0.56	unclassified_Eurotatoria	0.56	unclassified_Eurotatoria	0.56	unclassified_Eurotatoria_sp	0.56	1	0	0	0	0	0	0	0	0	0	0	0	0	0	0	0	0	0	0	0	0	0	0	0	0	0	0	0	0	0	0	0	0	0
10fc78aecafbb47cdd9729c46667b2f56fd27604	#N/A	Metazoa	1	Rotifera	1	Eurotatoria	1	unclassified_Eurotatoria	0.56	unclassified_Eurotatoria	0.56	unclassified_Eurotatoria	0.56	unclassified_Eurotatoria_sp	0.56	0	0	0	0	0	0	0	0	0	0	0	0	0	0	0	0	0	0	0	0	0	0	1	0	0	0	0	0	0	0	0	0	0	0
adb53569373546b364bbba4e667b2b2cfb015af4	#N/A	Metazoa	1	Rotifera	1	Eurotatoria	1	unclassified_Eurotatoria	0.56	unclassified_Eurotatoria	0.56	unclassified_Eurotatoria	0.56	unclassified_Eurotatoria_sp	0.56	0	0	0	0	0	0	0	0	0	0	1	0	0	0	0	0	0	0	0	0	0	0	0	0	0	0	7	0	0	0	0	0	0	0
f7a3b84c6060811c23f56bb6fc1f7f5a907c6487	#N/A	Metazoa	1	Rotifera	1	Eurotatoria	1	unclassified_Eurotatoria	0.63	unclassified_Eurotatoria	0.6	unclassified_Eurotatoria	0.56	unclassified_Eurotatoria_sp	0.56	1	0	1	0	0	0	0	0	0	0	0	0	0	1	0	52	1	0	0	0	0	0	0	0	0	0	0	0	0	0	0	0	0	0
6d8c9681828e94e51dc3c2e52d3bce1df654d216	#N/A	Metazoa	1	Rotifera	1	Eurotatoria	1	unclassified_Eurotatoria	0.56	unclassified_Eurotatoria	0.56	unclassified_Eurotatoria	0.56	unclassified_Eurotatoria_sp	0.56	0	0	14	1	0	0	0	0	0	0	0	0	0	0	0	0	0	0	0	1	0	0	0	0	0	0	0	0	0	0	0	85	0	0
9007894cbfa2554e220d105dc0a164ea454fc58a	#N/A	Metazoa	1	Rotifera	1	Eurotatoria	1	unclassified_Eurotatoria	0.56	unclassified_Eurotatoria	0.56	unclassified_Eurotatoria	0.56	unclassified_Eurotatoria_sp	0.55	0	1	0	0	0	0	0	0	0	0	0	0	0	0	0	0	0	0	0	0	0	0	0	0	0	0	0	0	0	0	0	0	0	0
5a5f14229934ea32674bc4071226b9bf838e8c07	#N/A	Metazoa	1	Rotifera	1	Eurotatoria	1	unclassified_Eurotatoria	0.55	unclassified_Eurotatoria	0.55	unclassified_Eurotatoria	0.55	unclassified_Eurotatoria_sp	0.55	0	0	0	0	0	0	0	0	0	0	0	0	0	0	0	0	0	0	0	1	0	0	0	0	0	0	0	0	0	0	0	0	0	0
7d7391d0ee5c5254c3531fcebf1ed493f0c695c3	#N/A	Metazoa	1	Rotifera	1	Eurotatoria	1	unclassified_Eurotatoria	0.55	unclassified_Eurotatoria	0.55	unclassified_Eurotatoria	0.55	unclassified_Eurotatoria_sp	0.55	0	0	0	0	0	0	0	0	0	0	0	0	0	1	0	0	0	0	0	0	0	0	0	0	0	0	0	0	0	0	0	0	0	0
8346bfedd6b2242e2aba55d075c5957b386e2541	#N/A	Metazoa	1	Rotifera	0.99	Eurotatoria	0.99	unclassified_Eurotatoria	0.63	unclassified_Eurotatoria	0.6	unclassified_Eurotatoria	0.55	unclassified_Eurotatoria_sp	0.55	0	0	0	0	0	0	0	0	0	0	0	0	0	0	0	0	0	1	0	0	0	0	0	0	0	0	0	0	0	0	0	0	0	0
85c3106fc48d6f8fa1309af1d56d9981819a6e4c	#N/A	Metazoa	1	Rotifera	1	Eurotatoria	1	unclassified_Eurotatoria	0.55	unclassified_Eurotatoria	0.55	unclassified_Eurotatoria	0.55	unclassified_Eurotatoria_sp	0.55	0	0	0	0	0	0	1	0	0	0	0	0	0	0	0	0	0	0	0	0	0	0	0	0	0	0	0	0	0	0	0	0	0	0
cec140222212debcf426fed81ea3600a0b515530	#N/A	Metazoa	1	Rotifera	1	Eurotatoria	1	unclassified_Eurotatoria	0.55	unclassified_Eurotatoria	0.55	unclassified_Eurotatoria	0.55	unclassified_Eurotatoria_sp	0.55	0	0	0	0	0	0	0	0	1	0	0	0	0	2	0	0	0	0	0	0	0	0	0	0	0	0	0	0	0	0	0	0	0	0
f6480d1af6068fdcda7acbb4c5531d5eaebfcfd8	#N/A	Metazoa	1	Rotifera	1	Eurotatoria	1	unclassified_Eurotatoria	0.55	unclassified_Eurotatoria	0.55	unclassified_Eurotatoria	0.55	unclassified_Eurotatoria_sp	0.55	0	0	0	0	0	0	0	0	0	0	0	0	0	0	0	0	0	0	0	0	0	0	0	0	0	0	0	0	0	0	0	0	0	0
493083891ffef5c2328cfe249e2ff64de2238e0e	#N/A	Metazoa	1	Rotifera	1	Eurotatoria	1	unclassified_Eurotatoria	0.55	unclassified_Eurotatoria	0.55	unclassified_Eurotatoria	0.55	unclassified_Eurotatoria_sp	0.54	0	0	1	0	0	0	0	0	0	0	0	0	0	0	0	0	0	0	0	0	0	0	0	0	0	0	0	0	0	0	0	0	0	0
a2909a6ee171ce772009bc8d00e845aa232fa6ac	#N/A	Metazoa	1	Rotifera	1	Eurotatoria	1	unclassified_Eurotatoria	0.55	unclassified_Eurotatoria	0.55	unclassified_Eurotatoria	0.55	unclassified_Eurotatoria_sp	0.54	0	0	1	4	0	0	0	0	0	0	0	0	0	0	0	0	0	0	0	0	0	0	0	0	0	0	0	0	0	0	0	0	0	0
4f441889c74914c01c3626784a81553853122863	#N/A	Metazoa	1	Rotifera	1	Eurotatoria	1	unclassified_Eurotatoria	0.55	unclassified_Eurotatoria	0.55	unclassified_Eurotatoria	0.55	unclassified_Eurotatoria_sp	0.54	0	0	0	0	0	0	0	0	1	1	1	0	1	4	14	8	2	0	0	0	0	0	0	0	0	0	0	0	0	0	0	0	0	0
b77e869f6d9ce5a27da45fd7f0ffbc72645c759d	#N/A	Metazoa	0.99	Rotifera	0.99	Eurotatoria	0.99	unclassified_Eurotatoria	0.78	unclassified_Eurotatoria	0.57	unclassified_Eurotatoria	0.55	unclassified_Eurotatoria_sp	0.49	0	0	0	0	0	0	0	0	0	0	0	0	0	0	0	0	0	0	0	0	0	0	0	1	0	0	0	0	0	0	0	0	0	0
7e630412dc9c12e22b24fa052db90e9f81999f76	#N/A	Metazoa	1	Rotifera	0.98	Eurotatoria	0.98	unclassified_Eurotatoria	0.73	unclassified_Eurotatoria	0.7	unclassified_Eurotatoria	0.55	unclassified_Eurotatoria_sp	0.41	0	0	0	0	0	0	0	0	0	0	0	0	0	0	0	0	0	0	0	0	1	0	0	0	0	0	0	0	0	0	0	0	0	0
da8b2827b2434941638da0e971e0d162b60c2f12	#N/A	Metazoa	1	Rotifera	1	Eurotatoria	1	unclassified_Eurotatoria	0.59	unclassified_Eurotatoria	0.56	unclassified_Eurotatoria	0.55	unclassified_Eurotatoria_sp	0.29	0	0	0	0	0	0	0	0	0	0	0	0	0	0	0	1	0	0	0	0	0	0	0	0	0	0	0	0	0	0	0	0	0	0
b0a5bc159713f383b0b3cc7b688a1b2ecd70eb2f	#N/A	Metazoa	1	Rotifera	1	Eurotatoria	1	unclassified_Eurotatoria	0.55	unclassified_Eurotatoria	0.54	unclassified_Eurotatoria	0.54	unclassified_Eurotatoria_sp	0.54	0	0	0	0	0	0	0	0	0	0	0	0	0	0	0	0	0	0	0	0	0	0	0	1	0	0	0	0	0	0	0	0	0	0
feef58dff4103e0b1209717138fd2d18d719ed17	#N/A	Metazoa	1	Rotifera	1	Eurotatoria	1	unclassified_Eurotatoria	0.54	unclassified_Eurotatoria	0.54	unclassified_Eurotatoria	0.54	unclassified_Eurotatoria_sp	0.54	0	0	0	0	0	0	0	0	0	0	0	0	0	0	0	0	0	0	0	0	1	0	0	0	0	0	0	0	0	0	0	0	0	0
026ddf29cb1bfb7f5c792d1f8c769988b7bbb7bf	#N/A	Metazoa	1	Rotifera	1	Eurotatoria	1	unclassified_Eurotatoria	0.54	unclassified_Eurotatoria	0.54	unclassified_Eurotatoria	0.54	unclassified_Eurotatoria_sp	0.54	0	0	0	0	0	0	0	0	0	0	0	0	0	0	0	0	0	0	0	0	0	0	0	0	0	0	0	0	0	0	0	0	0	0
403856bcc884a49ba7623e5dd134b2823d573d8f	#N/A	Metazoa	1	Rotifera	1	Eurotatoria	1	unclassified_Eurotatoria	0.54	unclassified_Eurotatoria	0.54	unclassified_Eurotatoria	0.54	unclassified_Eurotatoria_sp	0.54	0	0	0	0	0	0	0	0	0	0	0	0	0	0	0	0	0	0	0	0	0	0	0	18	0	0	0	1	0	0	1	0	0	0
f3926ee10b163eb9ff581723abbed83e9fcc8738	#N/A	Metazoa	1	Rotifera	1	Eurotatoria	1	unclassified_Eurotatoria	0.54	unclassified_Eurotatoria	0.54	unclassified_Eurotatoria	0.54	unclassified_Eurotatoria_sp	0.53	0	0	0	0	0	0	0	0	0	0	0	0	1	0	0	0	0	0	0	0	0	0	0	0	0	0	0	0	0	0	0	0	0	0
f5abd8a5eb42b6dbeb3aedf31aadf6986eb86ec8	#N/A	Metazoa	1	Rotifera	1	Eurotatoria	1	unclassified_Eurotatoria	0.54	unclassified_Eurotatoria	0.54	unclassified_Eurotatoria	0.54	unclassified_Eurotatoria_sp	0.53	0	0	0	0	0	0	0	0	0	0	0	0	0	0	3	1	0	0	0	0	0	0	0	0	0	0	0	0	0	0	0	0	0	0
b482472371c8bbaf87220d42dbf96734bddfc4d0	#N/A	Metazoa	1	Rotifera	1	Eurotatoria	1	unclassified_Eurotatoria	0.54	unclassified_Eurotatoria	0.54	unclassified_Eurotatoria	0.54	unclassified_Eurotatoria_sp	0.52	0	0	1	3	0	0	1	0	0	0	1	0	0	0	0	0	11	0	0	1	0	0	0	0	0	3	0	1	1	0	0	0	0	0
64ab63cc7a14a3fe5b4053130c62849c91023eb0	#N/A	Metazoa	1	Rotifera	1	Eurotatoria	1	unclassified_Eurotatoria	0.54	unclassified_Eurotatoria	0.54	unclassified_Eurotatoria	0.54	unclassified_Eurotatoria_sp	0.51	0	0	0	0	0	0	0	0	0	0	0	0	0	0	0	0	0	1	0	0	1	0	0	0	0	0	0	0	0	0	0	0	0	0
7c74773a5f23c238e5a9582a87b7cf14136e00e0	#N/A	Metazoa	1	Rotifera	1	Eurotatoria	1	unclassified_Eurotatoria	0.54	unclassified_Eurotatoria	0.54	unclassified_Eurotatoria	0.54	unclassified_Eurotatoria_sp	0.49	0	0	0	0	0	0	0	1	0	0	0	0	0	0	0	0	0	0	0	0	0	0	0	0	0	0	0	0	0	0	0	0	0	0
c8d163225dd43ec6898f96fc66766802bc2bc00b	#N/A	Metazoa	1	Rotifera	1	Eurotatoria	1	unclassified_Eurotatoria	0.54	unclassified_Eurotatoria	0.54	unclassified_Eurotatoria	0.54	unclassified_Eurotatoria_sp	0.49	0	0	0	0	0	0	0	0	0	0	0	0	0	0	0	0	0	0	5	0	0	0	0	0	0	0	0	0	0	0	0	0	0	0
1e7353b58a92af24365c718b15b26f8c69502f1a	#N/A	Metazoa	1	Rotifera	0.99	Eurotatoria	0.99	unclassified_Eurotatoria	0.54	unclassified_Eurotatoria	0.54	unclassified_Eurotatoria	0.54	unclassified_Eurotatoria_sp	0.44	0	0	0	0	0	0	0	0	0	0	0	0	0	0	0	0	0	3	0	0	0	0	1	1	0	0	0	0	0	0	0	0	0	0
e81ccbfe4489bc8bb5c18c1b6bc57a2aa7ff0da2	#N/A	Metazoa	1	Rotifera	1	Eurotatoria	1	unclassified_Eurotatoria	0.54	unclassified_Eurotatoria	0.54	unclassified_Eurotatoria	0.54	unclassified_Eurotatoria_sp	0.33	0	0	0	0	0	0	0	0	0	0	0	0	0	0	0	0	0	0	0	1	0	0	0	0	0	0	0	0	0	0	0	0	0	0
b32ea99ec1712273ae555063c48b2631d8038666	#N/A	Metazoa	1	Rotifera	1	Eurotatoria	1	unclassified_Eurotatoria	0.54	unclassified_Eurotatoria	0.54	unclassified_Eurotatoria	0.54	unclassified_Eurotatoria_sp	0.27	0	1	0	0	0	0	0	0	0	0	0	0	0	0	0	0	0	0	0	0	0	0	0	0	0	0	0	0	0	0	0	0	0	0
8b8148b5740e048d335b71dbf410c31f696151d4	#N/A	Metazoa	1	Rotifera	1	Eurotatoria	1	unclassified_Eurotatoria	0.53	unclassified_Eurotatoria	0.53	unclassified_Eurotatoria	0.53	unclassified_Eurotatoria_sp	0.53	0	5	0	0	0	0	0	0	0	0	0	0	0	0	0	0	0	0	0	0	0	0	0	0	0	0	0	0	0	0	0	0	0	0
7a08f56d534ee410f3ddc97771120b1cdb02aff2	#N/A	Metazoa	1	Rotifera	1	Eurotatoria	1	unclassified_Eurotatoria	0.53	unclassified_Eurotatoria	0.53	unclassified_Eurotatoria	0.53	unclassified_Eurotatoria_sp	0.52	0	0	0	0	0	0	0	0	0	0	0	0	0	0	0	0	0	0	0	0	0	0	1	0	0	0	0	0	0	0	0	0	0	0
7e7e7e6e0c0db96eef6838321b067e17131dbb22	#N/A	Metazoa	1	Rotifera	1	Eurotatoria	1	unclassified_Eurotatoria	0.53	unclassified_Eurotatoria	0.53	unclassified_Eurotatoria	0.53	unclassified_Eurotatoria_sp	0.51	0	0	1	3	5	0	4	1	0	0	0	0	0	0	0	0	0	0	0	0	0	0	0	0	0	0	0	0	0	0	0	0	6	0
5636766c386526375e490d7576c91b12e4fcd6b8	#N/A	Metazoa	1	Rotifera	1	Eurotatoria	1	unclassified_Eurotatoria	0.53	unclassified_Eurotatoria	0.53	unclassified_Eurotatoria	0.53	unclassified_Eurotatoria_sp	0.41	0	0	0	1	0	0	0	0	1	0	0	0	0	0	6	0	0	0	0	0	0	1	0	0	0	0	0	0	0	0	0	0	0	0
155a9355b90adb60285387c4b8022326298cff91	#N/A	Metazoa	1	Rotifera	1	Eurotatoria	1	unclassified_Eurotatoria	0.52	unclassified_Eurotatoria	0.52	unclassified_Eurotatoria	0.52	unclassified_Eurotatoria_sp	0.52	0	0	0	1	0	0	0	0	0	0	0	0	0	0	0	0	0	0	0	0	0	0	0	0	0	0	0	0	0	0	0	0	0	0
bc99d0d4da77e7b73a4f6872608024e5298cc398	#N/A	Metazoa	1	Rotifera	1	Eurotatoria	1	unclassified_Eurotatoria	0.52	unclassified_Eurotatoria	0.52	unclassified_Eurotatoria	0.52	unclassified_Eurotatoria_sp	0.52	0	0	0	0	5	0	0	0	0	0	0	0	0	0	0	0	0	0	0	0	0	0	0	0	0	0	0	0	0	7	0	0	0	3
80a47fa0ca1a9edddb908eb659e05d44204930de	#N/A	Metazoa	1	Rotifera	1	Eurotatoria	1	unclassified_Eurotatoria	0.52	unclassified_Eurotatoria	0.52	unclassified_Eurotatoria	0.52	unclassified_Eurotatoria_sp	0.51	0	0	0	0	0	0	0	0	0	0	0	0	0	0	0	0	0	0	1	0	0	0	0	0	0	0	0	0	0	0	0	0	0	0
52076fd62444c1eb6a734bbc4e97bab831268dd4	#N/A	Metazoa	1	Rotifera	1	Eurotatoria	1	unclassified_Eurotatoria	0.61	unclassified_Eurotatoria	0.58	unclassified_Eurotatoria	0.52	unclassified_Eurotatoria_sp	0.49	0	0	0	0	0	0	0	0	0	0	0	0	0	0	0	0	0	0	0	0	0	0	0	0	0	0	0	0	0	0	0	0	0	0
67566b08e729f8ee27b68b3df23374bcd5d235a0	#N/A	Metazoa	1	Rotifera	1	Eurotatoria	1	unclassified_Eurotatoria	0.52	unclassified_Eurotatoria	0.52	unclassified_Eurotatoria	0.52	unclassified_Eurotatoria_sp	0.48	0	0	0	0	0	0	0	1	0	0	0	0	0	0	1	1	0	0	0	7	0	1	17	1	0	0	0	0	0	0	0	0	0	0
0dbceafb035217074575acc2d374df37bbb2bcdb	#N/A	Metazoa	1	Rotifera	1	Eurotatoria	1	unclassified_Eurotatoria	0.52	unclassified_Eurotatoria	0.52	unclassified_Eurotatoria	0.52	unclassified_Eurotatoria_sp	0.48	1	0	0	1	0	0	2	0	3	22	0	0	2	0	0	8	1	6	4	10	0	0	1	0	0	0	0	0	0	0	0	0	0	0
a917c0d4bd9f11f2a2c515cd499e62762c7b79de	#N/A	Metazoa	1	Rotifera	1	Eurotatoria	1	unclassified_Eurotatoria	0.54	unclassified_Eurotatoria	0.53	unclassified_Eurotatoria	0.52	unclassified_Eurotatoria_sp	0.45	0	0	0	0	0	0	0	0	0	0	0	0	0	0	0	0	0	0	0	0	0	0	0	0	0	0	0	0	0	0	0	0	0	0
a2d8a0efca8d23cfa40e0dd53042f693aff5f67f	#N/A	Metazoa	1	Rotifera	1	Eurotatoria	1	unclassified_Eurotatoria	0.64	unclassified_Eurotatoria	0.58	unclassified_Eurotatoria	0.52	unclassified_Eurotatoria_sp	0.32	0	0	0	0	0	0	0	0	0	0	0	0	0	0	0	0	0	0	0	0	0	0	0	1	0	0	0	0	0	0	0	0	0	0
b6328aebfe02bfbb9dd6669b72edf49bcf8a383a	#N/A	Metazoa	1	Rotifera	0.99	Eurotatoria	0.99	unclassified_Eurotatoria	0.74	unclassified_Eurotatoria	0.71	unclassified_Eurotatoria	0.52	unclassified_Eurotatoria_sp	0.31	0	0	0	0	0	0	0	0	0	0	0	0	0	0	0	0	0	0	0	0	0	0	0	0	0	0	0	0	0	0	0	0	0	0
f740aae11cfa69f05ae9d044f77c1fb621792f1d	#N/A	Metazoa	1	Rotifera	0.99	Eurotatoria	0.99	unclassified_Eurotatoria	0.69	unclassified_Eurotatoria	0.61	unclassified_Eurotatoria	0.52	unclassified_Eurotatoria_sp	0.25	0	0	0	0	0	0	0	0	0	0	0	0	0	0	1	0	0	0	0	0	0	0	0	0	0	0	0	0	0	0	0	0	0	0
9526305212f07814627a260e04c90da096cb593f	#N/A	Metazoa	1	Rotifera	1	Eurotatoria	1	unclassified_Eurotatoria	0.51	unclassified_Eurotatoria	0.51	unclassified_Eurotatoria	0.51	unclassified_Eurotatoria_sp	0.51	0	0	0	0	0	0	0	0	0	0	0	0	0	0	0	1	0	0	0	0	0	0	0	0	0	0	0	0	0	0	0	0	0	0
9617c70075424ea24ddfb26ce0f95a571e8431a9	#N/A	Metazoa	1	Rotifera	1	Eurotatoria	1	unclassified_Eurotatoria	0.52	unclassified_Eurotatoria	0.52	unclassified_Eurotatoria	0.51	unclassified_Eurotatoria_sp	0.51	0	0	0	0	0	0	0	0	0	0	0	0	0	0	0	0	0	0	1	0	0	0	0	0	0	0	0	0	0	0	0	0	0	0
b70a11b320f9e6a97f8141012a281390298ea2d4	#N/A	Metazoa	1	Rotifera	1	Eurotatoria	1	unclassified_Eurotatoria	0.51	unclassified_Eurotatoria	0.51	unclassified_Eurotatoria	0.51	unclassified_Eurotatoria_sp	0.51	0	0	0	0	0	0	0	0	1	0	0	0	0	0	0	0	0	0	0	0	0	0	0	0	0	0	0	0	0	0	0	0	0	0
f6af63eb77928341fe2c50ee4e3a90e50965e317	#N/A	Metazoa	1	Rotifera	1	Eurotatoria	1	unclassified_Eurotatoria	0.51	unclassified_Eurotatoria	0.51	unclassified_Eurotatoria	0.51	unclassified_Eurotatoria_sp	0.51	0	0	1	0	0	0	0	0	0	0	0	0	0	0	0	0	0	0	0	0	0	0	0	0	0	0	0	0	0	0	0	0	0	0
fac9d6d4205e8305e9e98c42945403ebbd187ae1	#N/A	Metazoa	1	Rotifera	1	Eurotatoria	1	unclassified_Eurotatoria	0.51	unclassified_Eurotatoria	0.51	unclassified_Eurotatoria	0.51	unclassified_Eurotatoria_sp	0.51	0	0	0	0	0	1	0	0	0	0	0	0	0	0	0	0	0	0	0	0	0	0	0	0	0	0	0	0	0	0	0	0	0	0
ffe5a5fa36ecdbc24b7cb5f3b5e374c2a89714e8	#N/A	Metazoa	1	Rotifera	1	Eurotatoria	1	unclassified_Eurotatoria	0.51	unclassified_Eurotatoria	0.51	unclassified_Eurotatoria	0.51	unclassified_Eurotatoria_sp	0.51	0	0	0	0	0	0	0	0	0	0	0	0	0	0	0	0	0	0	0	0	0	0	0	0	0	0	0	0	0	0	0	0	0	0
174b6d1f22f40b251a3659312ccbbdd62e962d8a	#N/A	Metazoa	1	Rotifera	1	Eurotatoria	1	unclassified_Eurotatoria	0.51	unclassified_Eurotatoria	0.51	unclassified_Eurotatoria	0.51	unclassified_Eurotatoria_sp	0.51	0	0	1	0	0	0	1	4	0	0	0	0	0	0	0	0	0	0	0	0	0	0	0	0	0	0	0	0	0	0	0	0	0	0
7320c3711d61d16bad5e089befb8ec50ca9e320f	#N/A	Metazoa	1	Rotifera	1	Eurotatoria	1	unclassified_Eurotatoria	0.51	unclassified_Eurotatoria	0.51	unclassified_Eurotatoria	0.51	unclassified_Eurotatoria_sp	0.5	0	0	5	0	5	0	0	0	0	0	0	0	0	0	0	0	0	0	0	0	0	0	1	0	0	0	0	0	0	0	0	0	0	0
da6a685fe3beac00f1e4cf3d6e4b088ab100a2d0	#N/A	Metazoa	1	Rotifera	1	Eurotatoria	1	unclassified_Eurotatoria	0.51	unclassified_Eurotatoria	0.51	unclassified_Eurotatoria	0.51	unclassified_Eurotatoria_sp	0.47	0	1	0	0	0	0	0	0	0	0	0	0	0	0	0	0	0	0	0	0	0	0	0	0	0	0	0	0	0	0	0	0	0	0
d04a998fe1bcb51b6b5b311b4d3e9c42a39348a6	#N/A	Metazoa	1	Rotifera	1	Eurotatoria	1	unclassified_Eurotatoria	0.61	unclassified_Eurotatoria	0.56	unclassified_Eurotatoria	0.51	unclassified_Eurotatoria_sp	0.46	0	0	0	0	0	0	0	0	0	0	0	0	0	0	1	0	0	0	0	0	0	0	0	0	0	0	0	0	0	0	0	0	0	0
5d8ac55e8f21887775abcd69399d3624ad6f385c	#N/A	Metazoa	1	Rotifera	1	Eurotatoria	1	unclassified_Eurotatoria	0.51	unclassified_Eurotatoria	0.51	unclassified_Eurotatoria	0.51	unclassified_Eurotatoria_sp	0.46	1	0	7	3	0	0	0	0	0	0	0	0	0	0	0	0	0	0	0	0	0	0	0	0	0	0	0	0	0	0	0	0	0	0
bb3cba5aea8def47192026716c504d5f60f9231a	#N/A	Metazoa	1	Rotifera	0.99	Eurotatoria	0.99	unclassified_Eurotatoria	0.52	unclassified_Eurotatoria	0.52	unclassified_Eurotatoria	0.51	unclassified_Eurotatoria_sp	0.45	0	0	0	0	0	0	0	0	0	0	0	0	0	0	0	0	0	0	0	0	0	0	0	0	0	0	0	0	0	0	1	0	0	0
e7acb2f32be8544cfd48c7bee8b577c72147844c	#N/A	Metazoa	1	Rotifera	1	Eurotatoria	1	unclassified_Eurotatoria	0.51	unclassified_Eurotatoria	0.51	unclassified_Eurotatoria	0.51	unclassified_Eurotatoria_sp	0.45	0	0	0	0	0	0	0	0	0	0	0	0	1	0	0	0	0	0	0	0	0	0	0	0	0	0	0	0	0	0	0	0	0	0
036b771f4b311a69ea148b6d26bd4326d8e8928f	#N/A	Metazoa	1	Rotifera	1	Eurotatoria	1	unclassified_Eurotatoria	0.67	unclassified_Eurotatoria	0.65	unclassified_Eurotatoria	0.51	unclassified_Eurotatoria_sp	0.45	3	0	0	0	0	0	0	0	0	0	0	0	0	0	0	0	0	0	0	0	0	0	0	0	0	0	0	0	0	0	0	0	0	0
3d79baee2a290af8056406d563b25dc5ef5a4e1b	#N/A	Metazoa	1	Rotifera	1	Eurotatoria	1	unclassified_Eurotatoria	0.54	unclassified_Eurotatoria	0.54	unclassified_Eurotatoria	0.51	unclassified_Eurotatoria_sp	0.42	0	1	6	0	0	1	1	3	0	1	2	0	0	0	12	1	1	432	82	25	39	2	8	3	0	0	0	0	0	0	0	1	0	0
ba7cba3ea1d863fbc301b7f1df4d83a007b65524	#N/A	Metazoa	1	Rotifera	1	Eurotatoria	1	unclassified_Eurotatoria	0.62	unclassified_Eurotatoria	0.6	unclassified_Eurotatoria	0.51	unclassified_Eurotatoria_sp	0.32	0	0	0	0	0	0	0	0	0	0	1	0	0	0	0	0	0	0	0	0	0	0	0	0	0	0	0	0	0	0	0	0	0	0
656f78ac3e7f79d39be39ea10a32addc4032af4e	#N/A	Metazoa	1	Rotifera	1	Eurotatoria	1	unclassified_Eurotatoria	0.5	unclassified_Eurotatoria	0.5	unclassified_Eurotatoria	0.5	unclassified_Eurotatoria_sp	0.5	0	0	0	0	0	0	0	0	0	0	0	0	0	0	0	0	0	0	0	1	0	0	0	0	0	0	0	0	0	0	0	0	0	0
7124162ab3ae29bbeea219ef2e6cf89481c6970f	#N/A	Metazoa	1	Rotifera	1	Eurotatoria	1	unclassified_Eurotatoria	0.5	unclassified_Eurotatoria	0.5	unclassified_Eurotatoria	0.5	unclassified_Eurotatoria_sp	0.5	0	0	0	0	0	0	0	0	0	0	0	0	0	0	0	0	0	0	0	0	0	0	0	3	0	0	0	0	0	0	0	0	0	0
99648ce509657302928d0d82d8db3a1950cb311a	#N/A	Metazoa	1	Rotifera	1	Eurotatoria	1	unclassified_Eurotatoria	0.5	unclassified_Eurotatoria	0.5	unclassified_Eurotatoria	0.5	unclassified_Eurotatoria_sp	0.5	0	0	6	0	0	0	0	0	0	0	0	0	0	0	0	0	0	0	0	0	0	0	0	0	0	0	0	0	0	0	0	0	0	0
ac397b1e41899652b54453781f11468d906a43b4	#N/A	Metazoa	1	Rotifera	1	Eurotatoria	1	unclassified_Eurotatoria	0.5	unclassified_Eurotatoria	0.5	unclassified_Eurotatoria	0.5	unclassified_Eurotatoria_sp	0.5	0	0	5	17	0	4	0	0	0	0	0	0	0	0	0	1	0	0	0	0	0	0	0	0	0	0	0	0	0	0	0	11	1	0
7a923a7b2c997dbf3481d5f5eb951c6c27e0749f	#N/A	Metazoa	1	Rotifera	1	Eurotatoria	1	unclassified_Eurotatoria	0.59	unclassified_Eurotatoria	0.59	unclassified_Eurotatoria	0.5	unclassified_Eurotatoria_sp	0.49	0	0	0	0	0	0	0	0	0	0	0	0	0	0	0	0	0	0	0	0	0	0	0	1	0	0	0	0	0	0	0	0	0	0
0675e9ed95c7ebd20bf3c6d9f8b057e44ca5f7cb	#N/A	Metazoa	1	Rotifera	1	Eurotatoria	1	unclassified_Eurotatoria	0.5	unclassified_Eurotatoria	0.5	unclassified_Eurotatoria	0.5	unclassified_Eurotatoria_sp	0.47	0	0	0	1	0	0	0	0	0	0	0	0	0	0	0	0	0	0	0	0	0	0	0	0	0	0	0	0	0	0	0	0	0	0
efd19fa2934a2861ce3a9e279e5318d29e7e7e4c	#N/A	Metazoa	1	Rotifera	1	Eurotatoria	1	unclassified_Eurotatoria	0.5	unclassified_Eurotatoria	0.5	unclassified_Eurotatoria	0.5	unclassified_Eurotatoria_sp	0.47	0	0	0	0	0	0	0	0	0	0	0	0	1	0	4	0	0	0	3	0	6	0	0	0	0	0	0	0	0	0	0	0	0	0
016d169d4bb0ce75bbf4d2fbd870e9f33b58f910	#N/A	Metazoa	1	Rotifera	1	Eurotatoria	1	unclassified_Eurotatoria	0.78	unclassified_Eurotatoria	0.77	unclassified_Eurotatoria	0.5	unclassified_Eurotatoria_sp	0.46	0	0	0	0	0	0	0	0	0	0	0	0	0	0	0	0	0	0	0	0	0	0	0	0	0	0	0	0	0	0	0	0	0	0
341cb8326e730b5c259191643a411a00b3c7e40b	#N/A	Metazoa	1	Rotifera	1	Eurotatoria	1	unclassified_Eurotatoria	0.66	unclassified_Eurotatoria	0.6	unclassified_Eurotatoria	0.5	unclassified_Eurotatoria_sp	0.43	0	0	0	0	0	0	0	0	1	0	0	0	0	0	0	0	0	0	0	0	0	0	0	0	0	0	0	0	0	0	0	0	0	0
de77b89a1ffab3ecf5449b12ba5bd205df265747	#N/A	Metazoa	1	Rotifera	1	Eurotatoria	1	unclassified_Eurotatoria	0.5	unclassified_Eurotatoria	0.5	unclassified_Eurotatoria	0.5	unclassified_Eurotatoria_sp	0.24	1	0	0	0	0	0	0	0	0	0	0	0	0	0	0	0	0	0	0	0	0	0	0	0	0	0	0	0	0	0	0	0	0	0
1fe8746def0b7b068df3f42c13bf2846468a3f80	#N/A	Metazoa	1	Rotifera	1	Eurotatoria	1	unclassified_Eurotatoria	0.49	unclassified_Eurotatoria	0.49	unclassified_Eurotatoria	0.49	unclassified_Eurotatoria_sp	0.49	0	0	0	1	0	0	0	0	0	0	0	0	0	0	0	0	0	0	0	0	0	0	0	0	0	0	0	0	0	0	0	0	0	0
673ea9e89e66fc2ae6bc35161fdbae632b85405b	#N/A	Metazoa	1	Rotifera	1	Eurotatoria	1	unclassified_Eurotatoria	0.49	unclassified_Eurotatoria	0.49	unclassified_Eurotatoria	0.49	unclassified_Eurotatoria_sp	0.49	0	0	0	0	0	0	0	0	0	0	0	0	0	0	0	0	0	0	0	0	0	0	0	0	0	0	0	0	0	0	0	0	0	0
7f3f6f450dc4563438fa8c28c0ea7a8083351c9f	#N/A	Metazoa	1	Rotifera	1	Eurotatoria	1	unclassified_Eurotatoria	0.49	unclassified_Eurotatoria	0.49	unclassified_Eurotatoria	0.49	unclassified_Eurotatoria_sp	0.47	0	0	0	0	0	0	0	0	0	0	0	0	0	0	0	0	0	0	0	0	1	0	0	0	0	0	0	0	0	0	0	0	0	0
4909831f5efc53e63eef6fb54c3dff9b49860fb6	#N/A	Metazoa	1	Rotifera	1	Eurotatoria	1	unclassified_Eurotatoria	0.49	unclassified_Eurotatoria	0.49	unclassified_Eurotatoria	0.49	unclassified_Eurotatoria_sp	0.38	0	1	0	0	0	0	0	0	0	0	0	0	0	0	0	0	0	0	0	0	0	0	0	0	0	0	0	0	0	0	0	0	0	0
0cf4bb385437d7b804e394d9db82173897b764b6	#N/A	Metazoa	1	Rotifera	1	Eurotatoria	1	unclassified_Eurotatoria	0.48	unclassified_Eurotatoria	0.48	unclassified_Eurotatoria	0.48	unclassified_Eurotatoria_sp	0.48	0	0	0	0	0	0	0	0	0	0	0	0	0	0	0	0	0	0	0	0	0	0	0	0	0	0	0	0	0	0	0	1	0	0
157613220206c7cff85632ba5d6efbd838d3344b	#N/A	Metazoa	1	Rotifera	0.98	Eurotatoria	0.98	unclassified_Eurotatoria	0.66	unclassified_Eurotatoria	0.54	unclassified_Eurotatoria	0.48	unclassified_Eurotatoria_sp	0.48	0	0	0	0	0	0	0	0	0	0	0	0	0	1	0	0	0	0	0	0	0	0	0	0	0	0	0	0	0	0	0	0	0	0
e8eb49e28e582b4407933027562d550cfb8d040c	#N/A	Metazoa	1	Rotifera	1	Eurotatoria	1	unclassified_Eurotatoria	0.48	unclassified_Eurotatoria	0.48	unclassified_Eurotatoria	0.48	unclassified_Eurotatoria_sp	0.48	0	0	0	0	0	0	0	0	0	0	0	0	0	0	0	0	0	0	0	0	0	0	0	0	0	0	0	0	0	0	0	0	0	0
c113b9870cc718c6877a26b44458f244d277c2fe	#N/A	Metazoa	1	Rotifera	1	Eurotatoria	1	unclassified_Eurotatoria	0.48	unclassified_Eurotatoria	0.48	unclassified_Eurotatoria	0.48	unclassified_Eurotatoria_sp	0.48	0	0	0	0	0	0	0	0	0	0	0	0	0	9	0	0	0	0	0	0	0	0	0	0	0	0	0	0	0	0	0	0	0	0
ceb79e4d12336dbbce87a8e29f7cb099494164ba	#N/A	Metazoa	1	Rotifera	1	Eurotatoria	1	unclassified_Eurotatoria	0.48	unclassified_Eurotatoria	0.48	unclassified_Eurotatoria	0.48	unclassified_Eurotatoria_sp	0.48	17	0	1	0	0	0	0	0	0	0	0	0	0	0	0	0	1	0	0	0	0	0	0	0	0	0	0	0	0	0	0	0	0	0
82f68543790a619607d662202052f55b002b7e40	#N/A	Metazoa	1	Rotifera	1	Eurotatoria	1	unclassified_Eurotatoria	0.48	unclassified_Eurotatoria	0.48	unclassified_Eurotatoria	0.48	unclassified_Eurotatoria_sp	0.48	58	6	0	0	0	0	0	0	0	0	0	0	0	0	0	0	0	0	0	0	0	0	0	0	0	0	0	0	0	2	0	0	0	0
4cf0a1f1513964d3c7bf2c5b5e3ef36e06b0f80e	#N/A	Metazoa	1	Rotifera	1	Eurotatoria	1	unclassified_Eurotatoria	0.48	unclassified_Eurotatoria	0.48	unclassified_Eurotatoria	0.48	unclassified_Eurotatoria_sp	0.47	0	0	0	0	0	0	0	0	0	0	0	0	0	0	0	0	0	0	0	1	0	0	0	0	0	0	0	0	0	0	0	0	0	0
d4fcd19807e91ad9e8216ffdd6b7c4c63344254a	#N/A	Metazoa	1	Rotifera	1	Eurotatoria	1	unclassified_Eurotatoria	0.51	unclassified_Eurotatoria	0.5	unclassified_Eurotatoria	0.48	unclassified_Eurotatoria_sp	0.46	0	0	0	0	0	0	0	0	0	0	0	0	0	0	0	0	0	0	0	1	0	0	0	0	0	0	0	0	0	0	0	0	0	0
b622750432345a2a9fe1940f124084ca95f60dfb	#N/A	Metazoa	1	Rotifera	1	Eurotatoria	1	unclassified_Eurotatoria	0.48	unclassified_Eurotatoria	0.48	unclassified_Eurotatoria	0.48	unclassified_Eurotatoria_sp	0.45	0	0	0	0	0	0	0	1	0	0	0	0	0	0	0	0	0	0	0	0	0	0	0	0	0	0	0	0	0	0	0	0	0	0
4ba8c2fde35694c62b49e07f82c052d4c79b09c6	#N/A	Metazoa	0.99	Rotifera	0.96	Eurotatoria	0.96	unclassified_Eurotatoria	0.48	unclassified_Eurotatoria	0.48	unclassified_Eurotatoria	0.48	unclassified_Eurotatoria_sp	0.41	0	0	0	0	0	0	0	0	0	0	1	0	0	0	0	0	0	0	0	0	0	0	0	0	0	0	0	0	0	0	0	0	0	0
766a194947ef21f766775b26ef692099c2acfc58	#N/A	Metazoa	0.97	Rotifera	0.84	Eurotatoria	0.84	unclassified_Eurotatoria	0.79	unclassified_Eurotatoria	0.59	unclassified_Eurotatoria	0.48	unclassified_Eurotatoria_sp	0.41	0	0	1	0	0	0	0	0	0	0	0	0	0	0	0	0	0	0	0	0	0	0	0	0	0	0	0	0	0	0	0	0	0	0
8f9a44bc765cd59c8f24756ac06548e69ca76100	#N/A	Metazoa	0.97	Rotifera	0.82	Eurotatoria	0.82	unclassified_Eurotatoria	0.66	unclassified_Eurotatoria	0.59	unclassified_Eurotatoria	0.48	unclassified_Eurotatoria_sp	0.39	0	0	0	0	0	0	0	0	0	0	0	0	1	0	0	0	0	0	0	0	0	0	0	0	0	0	0	0	0	0	0	0	0	0
958d4cbc8d1a44d1f42d404a14971b4b8dd3d642	#N/A	Metazoa	1	Rotifera	1	Eurotatoria	1	unclassified_Eurotatoria	0.47	unclassified_Eurotatoria	0.47	unclassified_Eurotatoria	0.47	unclassified_Eurotatoria_sp	0.47	0	1	0	0	0	0	0	0	0	0	0	0	0	0	0	0	0	0	0	0	0	0	0	0	0	0	0	0	0	0	0	0	0	0
cecd40ab8196c7b70b0801cc08e4906f1cba34ec	#N/A	Metazoa	0.98	Rotifera	0.85	Eurotatoria	0.85	unclassified_Eurotatoria	0.74	unclassified_Eurotatoria	0.57	unclassified_Eurotatoria	0.47	unclassified_Eurotatoria_sp	0.47	0	0	0	0	0	0	0	0	0	0	0	0	0	0	0	0	0	0	0	0	0	0	0	0	0	0	0	0	0	0	0	0	0	0
94d1b31915d2ee2edb55356da0f5ab134771b4f9	#N/A	Metazoa	1	Rotifera	1	Eurotatoria	1	unclassified_Eurotatoria	0.47	unclassified_Eurotatoria	0.47	unclassified_Eurotatoria	0.47	unclassified_Eurotatoria_sp	0.46	0	0	0	7	0	0	0	3	0	1	0	0	0	0	0	0	0	0	0	0	0	0	0	0	0	0	0	0	0	0	0	0	0	0
b2a8342b51ad5a3dccf1f53560e8165b80fb8889	#N/A	Metazoa	1	Rotifera	1	Eurotatoria	1	unclassified_Eurotatoria	0.63	unclassified_Eurotatoria	0.57	unclassified_Eurotatoria	0.47	unclassified_Eurotatoria_sp	0.45	0	0	0	0	0	0	0	0	0	0	0	0	0	0	1	0	0	0	0	0	0	0	0	0	0	0	0	0	0	0	0	0	0	0
e73579345ac6c01b4b4bfd23a95e0178dee1d49f	#N/A	Metazoa	1	Rotifera	1	Eurotatoria	1	unclassified_Eurotatoria	0.47	unclassified_Eurotatoria	0.47	unclassified_Eurotatoria	0.47	unclassified_Eurotatoria_sp	0.45	2	0	0	0	0	0	0	0	0	0	0	0	0	0	0	0	0	0	0	0	0	0	0	0	0	0	0	0	0	0	0	0	0	0
c82c9791704bf0a016f75ac507a104b25844fdbb	#N/A	Metazoa	1	Rotifera	1	Eurotatoria	1	unclassified_Eurotatoria	0.47	unclassified_Eurotatoria	0.47	unclassified_Eurotatoria	0.47	unclassified_Eurotatoria_sp	0.43	0	5	4	0	0	0	0	6	0	0	1	0	0	0	0	0	0	0	0	0	0	0	0	0	0	0	0	0	0	0	0	0	6	0
15d56ed9cb8200174af6881ac1db0e6de6c0b80b	#N/A	Metazoa	1	Rotifera	1	Eurotatoria	1	unclassified_Eurotatoria	0.47	unclassified_Eurotatoria	0.47	unclassified_Eurotatoria	0.47	unclassified_Eurotatoria_sp	0.42	0	0	0	0	0	0	0	1	0	0	0	0	0	0	0	0	0	0	0	0	0	0	0	0	0	0	0	0	0	0	0	0	0	0
1dbbc5cdab079d6b7e9820d81570eb3a18a153b9	#N/A	Metazoa	1	Rotifera	1	Eurotatoria	1	unclassified_Eurotatoria	0.47	unclassified_Eurotatoria	0.47	unclassified_Eurotatoria	0.47	unclassified_Eurotatoria_sp	0.33	0	0	0	0	0	0	0	0	0	0	0	0	0	0	0	0	0	0	1	1	0	0	0	0	0	0	0	0	0	0	0	0	0	0
0c53a2ddfee13409923e442ef9ff1581e0e8dd56	#N/A	Metazoa	1	Rotifera	1	Eurotatoria	1	unclassified_Eurotatoria	0.46	unclassified_Eurotatoria	0.46	unclassified_Eurotatoria	0.46	unclassified_Eurotatoria_sp	0.46	0	0	1	0	0	0	0	0	0	0	0	0	0	0	0	0	0	0	0	0	0	0	0	0	0	0	0	0	0	0	0	0	0	0
42713a176536d3af6214b47631557db15aaa5ea8	#N/A	Metazoa	1	Rotifera	1	Eurotatoria	1	unclassified_Eurotatoria	0.46	unclassified_Eurotatoria	0.46	unclassified_Eurotatoria	0.46	unclassified_Eurotatoria_sp	0.46	0	0	0	0	0	0	0	0	0	0	0	0	0	0	0	0	0	0	0	0	0	0	0	0	0	0	0	1	0	0	0	0	0	0
76057c8fe35677bd58808b341404de68733519ae	#N/A	Metazoa	1	Rotifera	1	Eurotatoria	1	unclassified_Eurotatoria	0.46	unclassified_Eurotatoria	0.46	unclassified_Eurotatoria	0.46	unclassified_Eurotatoria_sp	0.45	0	0	0	0	0	0	0	0	0	0	0	0	0	0	0	0	0	0	1	0	0	0	0	0	0	0	0	0	0	0	0	0	0	0
251ff77bc98d8c764b4a1b4d6c9ab11aaa27965d	#N/A	Metazoa	1	Rotifera	1	Eurotatoria	1	unclassified_Eurotatoria	0.46	unclassified_Eurotatoria	0.46	unclassified_Eurotatoria	0.46	unclassified_Eurotatoria_sp	0.45	0	0	0	0	0	0	0	0	0	0	0	0	0	1	0	17	0	0	0	0	1	0	0	0	0	0	0	0	0	0	0	0	0	0
5bb18c731bff7e9a44c8d6b95719e93305dbf612	#N/A	Metazoa	1	Rotifera	1	Eurotatoria	1	unclassified_Eurotatoria	0.7	unclassified_Eurotatoria	0.51	unclassified_Eurotatoria	0.46	unclassified_Eurotatoria_sp	0.44	1	0	0	0	0	0	0	0	0	0	0	0	0	0	0	0	0	0	0	0	0	0	0	0	0	0	0	0	0	0	0	0	0	0
9133ec2e9e8e9ba886e03df1e508e03b9423f068	#N/A	Metazoa	1	Rotifera	1	Eurotatoria	1	unclassified_Eurotatoria	0.59	unclassified_Eurotatoria	0.48	unclassified_Eurotatoria	0.46	unclassified_Eurotatoria_sp	0.43	0	0	0	0	0	1	0	0	0	0	0	0	0	0	0	0	0	0	0	0	0	0	0	0	0	0	0	0	0	0	0	0	0	0
6adbb91b5f99cad6c5ddbde7b4ceaf7eb1abd53d	#N/A	Metazoa	1	Rotifera	1	Eurotatoria	1	unclassified_Eurotatoria	0.66	unclassified_Eurotatoria	0.55	unclassified_Eurotatoria	0.46	unclassified_Eurotatoria_sp	0.43	0	0	0	0	0	0	3	0	0	0	0	0	0	0	0	0	0	0	0	0	0	0	0	0	0	0	0	0	0	0	0	0	0	0
9ab9fd379428f281be7364ea2822a8464aa471b2	#N/A	Metazoa	1	Rotifera	1	Eurotatoria	1	unclassified_Eurotatoria	0.46	unclassified_Eurotatoria	0.46	unclassified_Eurotatoria	0.46	unclassified_Eurotatoria_sp	0.42	0	0	0	0	0	0	0	0	0	0	0	0	0	0	0	0	0	0	0	0	0	0	0	0	0	0	0	0	0	0	0	0	0	0
3b6aaca37d4ff135f38f205770365cfb72b3617a	#N/A	Metazoa	1	Rotifera	0.99	Eurotatoria	0.99	unclassified_Eurotatoria	0.76	unclassified_Eurotatoria	0.68	unclassified_Eurotatoria	0.46	unclassified_Eurotatoria_sp	0.4	2	0	0	0	0	0	0	0	0	0	0	0	0	0	0	0	0	0	0	0	0	0	0	0	0	0	0	0	0	0	0	0	0	0
1834709aa4aa52057f5fdf249ad1983d53348064	#N/A	Metazoa	1	Rotifera	1	Eurotatoria	1	unclassified_Eurotatoria	0.74	unclassified_Eurotatoria	0.51	unclassified_Eurotatoria	0.46	unclassified_Eurotatoria_sp	0.39	0	0	0	0	0	0	0	0	0	0	0	0	0	0	0	0	0	0	0	0	0	0	0	0	0	0	0	0	0	0	0	0	0	0
63f2c3ab08e60053e0cf34d175ac409dfbc00fc9	#N/A	Metazoa	1	Rotifera	1	Eurotatoria	1	unclassified_Eurotatoria	0.46	unclassified_Eurotatoria	0.46	unclassified_Eurotatoria	0.46	unclassified_Eurotatoria_sp	0.38	0	0	0	0	0	0	0	0	0	0	0	0	0	0	0	0	0	0	1	0	0	0	0	0	0	0	0	0	0	0	0	0	0	0
2cc69bc95e573482076131f76347ec05cbf4860f	#N/A	Metazoa	1	Rotifera	0.99	Eurotatoria	0.99	unclassified_Eurotatoria	0.45	unclassified_Eurotatoria	0.45	unclassified_Eurotatoria	0.45	unclassified_Eurotatoria_sp	0.45	0	0	1	0	0	0	0	0	0	0	0	0	0	0	0	0	0	0	0	0	0	0	0	0	0	0	0	0	0	0	0	0	0	0
4f31c4ace5acf927e22727156443f32a6a008a39	#N/A	Metazoa	1	Rotifera	1	Eurotatoria	1	unclassified_Eurotatoria	0.45	unclassified_Eurotatoria	0.45	unclassified_Eurotatoria	0.45	unclassified_Eurotatoria_sp	0.44	0	0	0	0	0	0	0	0	0	0	0	0	0	0	0	0	0	0	0	0	0	0	0	0	0	0	0	0	0	0	0	0	0	0
e6b55a141614ddc1ced5e5666311e2e036924aca	#N/A	Metazoa	1	Rotifera	1	Eurotatoria	1	unclassified_Eurotatoria	0.47	unclassified_Eurotatoria	0.47	unclassified_Eurotatoria	0.45	unclassified_Eurotatoria_sp	0.41	0	0	0	0	0	0	0	0	0	0	0	0	0	0	0	0	0	0	0	0	0	0	0	0	0	0	0	0	0	1	0	0	0	0
c5363b603891c819b7900397a2f821474a7f250a	#N/A	Metazoa	1	Rotifera	1	Eurotatoria	1	unclassified_Eurotatoria	0.48	unclassified_Eurotatoria	0.45	unclassified_Eurotatoria	0.44	unclassified_Eurotatoria_sp	0.44	0	0	0	0	0	0	0	0	0	0	0	0	0	0	0	0	1	0	0	0	0	0	0	0	0	0	0	0	0	0	0	0	0	0
cc9680996ddf2b05e8c9eb25cd66710960644ed3	#N/A	Metazoa	1	Rotifera	1	Eurotatoria	1	unclassified_Eurotatoria	0.44	unclassified_Eurotatoria	0.44	unclassified_Eurotatoria	0.44	unclassified_Eurotatoria_sp	0.44	0	0	0	0	0	0	0	0	0	0	0	0	0	0	0	0	1	0	0	0	0	0	0	0	0	0	0	0	0	0	0	0	0	0
f18692e4508f868462927e62ea8f9ed56da52039	#N/A	Metazoa	1	Rotifera	1	Eurotatoria	1	unclassified_Eurotatoria	0.44	unclassified_Eurotatoria	0.44	unclassified_Eurotatoria	0.44	unclassified_Eurotatoria_sp	0.44	0	0	1	0	0	0	0	0	0	0	0	0	0	0	0	0	0	0	0	0	0	0	0	0	0	0	0	0	0	0	0	0	0	0
0f0909d95b921f1cf5143b22c4399e3dc74cb779	#N/A	Metazoa	1	Rotifera	1	Eurotatoria	1	unclassified_Eurotatoria	0.45	unclassified_Eurotatoria	0.44	unclassified_Eurotatoria	0.44	unclassified_Eurotatoria_sp	0.44	0	8	0	0	0	0	0	0	0	0	0	1	0	0	0	0	0	0	0	0	0	0	0	0	0	0	0	0	0	0	0	0	0	0
991f1dca3a096b731903451d9fddf71fc7f646b8	#N/A	Metazoa	1	Rotifera	1	Eurotatoria	1	unclassified_Eurotatoria	0.44	unclassified_Eurotatoria	0.44	unclassified_Eurotatoria	0.44	unclassified_Eurotatoria_sp	0.43	0	0	0	0	0	0	0	0	0	0	0	0	0	0	0	0	0	0	0	0	0	0	0	0	0	0	0	0	0	0	0	0	0	0
30a2a2563f962089a63d4e38c4b8e1fca0591e0c	#N/A	Metazoa	1	Rotifera	1	Eurotatoria	1	unclassified_Eurotatoria	0.44	unclassified_Eurotatoria	0.44	unclassified_Eurotatoria	0.44	unclassified_Eurotatoria_sp	0.43	0	1	0	0	0	1	0	0	0	0	0	0	0	0	0	0	0	0	0	0	0	0	1	0	0	0	0	0	0	0	0	0	0	0
2bff27dfd02ac0acd5ecbaeb8eb809f72cbf7f8b	#N/A	Metazoa	1	Rotifera	1	Eurotatoria	1	unclassified_Eurotatoria	0.44	unclassified_Eurotatoria	0.44	unclassified_Eurotatoria	0.44	unclassified_Eurotatoria_sp	0.42	0	1	0	0	0	0	0	0	0	0	0	0	0	0	0	0	0	0	0	0	0	0	0	0	0	0	0	0	0	0	11	0	0	0
f5b35ba11f0537c5149d963c93b7a858f7d7fac5	#N/A	Metazoa	1	Rotifera	1	Eurotatoria	1	unclassified_Eurotatoria	0.44	unclassified_Eurotatoria	0.44	unclassified_Eurotatoria	0.44	unclassified_Eurotatoria_sp	0.31	0	0	0	0	0	0	0	0	0	0	0	0	0	0	0	0	0	0	0	0	0	0	0	0	0	0	0	0	0	0	0	0	0	0
36a9a9c41875c10f34a41b34c10aa6eb2c2ea3c6	#N/A	Metazoa	1	Rotifera	1	Eurotatoria	1	unclassified_Eurotatoria	0.43	unclassified_Eurotatoria	0.43	unclassified_Eurotatoria	0.43	unclassified_Eurotatoria_sp	0.43	0	0	0	0	0	0	0	0	0	0	0	0	0	0	0	0	0	0	0	0	0	0	0	0	0	0	0	0	0	0	0	0	0	0
c4f732e33330b6500130c814ca0b71b535e26ca8	#N/A	Metazoa	1	Rotifera	1	Eurotatoria	1	unclassified_Eurotatoria	0.43	unclassified_Eurotatoria	0.43	unclassified_Eurotatoria	0.43	unclassified_Eurotatoria_sp	0.43	0	0	0	0	0	0	0	1	0	0	0	0	0	0	0	0	0	0	0	0	0	0	0	0	0	0	0	0	0	0	0	0	0	0
a984eb5dcead2cb41d1d5b166b3d1808ea3ab076	#N/A	Metazoa	0.93	Rotifera	0.88	Eurotatoria	0.88	unclassified_Eurotatoria	0.79	unclassified_Eurotatoria	0.61	unclassified_Eurotatoria	0.43	unclassified_Eurotatoria_sp	0.42	0	0	0	0	0	0	0	0	0	0	0	0	0	0	0	0	0	0	0	0	0	0	0	0	0	0	0	0	0	0	0	0	0	0
598a915dceada8c3060b68f25d5e296de008a32e	#N/A	Metazoa	1	Rotifera	0.99	Eurotatoria	0.99	unclassified_Eurotatoria	0.64	unclassified_Eurotatoria	0.54	unclassified_Eurotatoria	0.43	unclassified_Eurotatoria_sp	0.42	0	0	0	0	0	0	0	0	0	0	0	0	0	4	0	0	0	0	0	0	0	0	0	0	0	0	0	0	0	0	0	0	0	0
c9d7c235fb8498ce717461e53de8da8123df7595	#N/A	Metazoa	1	Rotifera	1	Eurotatoria	1	unclassified_Eurotatoria	0.43	unclassified_Eurotatoria	0.43	unclassified_Eurotatoria	0.43	unclassified_Eurotatoria_sp	0.4	0	0	0	0	0	0	0	0	0	0	0	0	0	0	0	0	0	0	0	0	0	0	0	0	0	0	0	0	0	0	0	0	0	0
ca116190ebc8353869903ad43bce55d693d37abc	#N/A	Metazoa	1	Rotifera	1	Eurotatoria	1	unclassified_Eurotatoria	0.43	unclassified_Eurotatoria	0.43	unclassified_Eurotatoria	0.43	unclassified_Eurotatoria_sp	0.36	0	0	0	0	0	0	0	0	0	0	0	0	0	0	0	0	0	0	0	0	0	0	0	0	0	0	0	0	0	0	0	0	0	0
450e8b12ece3eadcb82d4339a353b84b08306e7e	#N/A	Metazoa	1	Rotifera	1	Eurotatoria	1	unclassified_Eurotatoria	0.43	unclassified_Eurotatoria	0.43	unclassified_Eurotatoria	0.43	unclassified_Eurotatoria_sp	0.34	0	0	0	0	0	0	0	0	0	0	0	0	0	0	0	1	0	0	0	0	0	0	0	0	0	0	0	0	0	0	0	0	0	0
610ed7f345b2977af94a32566113a9e3148ceb7e	#N/A	Metazoa	1	Rotifera	1	Eurotatoria	1	unclassified_Eurotatoria	0.43	unclassified_Eurotatoria	0.43	unclassified_Eurotatoria	0.43	unclassified_Eurotatoria_sp	0.33	0	0	0	0	0	0	0	0	0	0	0	0	0	0	0	0	0	0	0	0	0	0	0	0	0	0	0	0	0	0	0	0	0	0
35348283354c319ce4b4e5c7122df0712d64b97d	#N/A	Metazoa	1	Rotifera	1	Eurotatoria	1	unclassified_Eurotatoria	0.63	unclassified_Eurotatoria	0.44	unclassified_Eurotatoria	0.43	unclassified_Eurotatoria_sp	0.29	0	0	0	0	0	0	0	0	0	0	0	0	0	1	0	0	0	0	0	0	0	0	0	0	0	0	0	0	0	0	0	0	0	0
cbee36853c3316f1f9f4ca515571818461e8e1bd	#N/A	Metazoa	0.99	Rotifera	0.86	Eurotatoria	0.86	unclassified_Eurotatoria	0.72	unclassified_Eurotatoria	0.43	unclassified_Eurotatoria	0.43	unclassified_Eurotatoria_sp	0.23	0	0	0	0	0	0	0	0	0	0	0	0	0	0	0	0	0	0	0	0	0	0	0	0	0	0	0	0	0	0	0	0	0	0
27671d0844e566b072976877cb9f37f1e3c30980	#N/A	Metazoa	1	Rotifera	1	Eurotatoria	1	unclassified_Eurotatoria	0.55	unclassified_Eurotatoria	0.52	unclassified_Eurotatoria	0.43	unclassified_Eurotatoria_sp	0.21	0	0	0	0	0	0	0	0	0	0	0	0	0	0	0	0	0	0	0	0	0	0	0	0	0	0	0	0	0	0	0	0	1	0
0249e02ac49ff2ccbe1b754eb61f4ad2ec5fe71a	#N/A	Metazoa	1	Rotifera	1	Eurotatoria	1	unclassified_Eurotatoria	0.51	unclassified_Eurotatoria	0.51	unclassified_Eurotatoria	0.42	unclassified_Eurotatoria_sp	0.42	0	1	1	0	0	0	0	0	0	0	0	0	0	0	0	0	0	0	0	0	0	0	0	0	0	0	0	0	0	0	0	1	0	0
44f9bedba26b7f34aff12181589b3d7be964414c	#N/A	Metazoa	1	Rotifera	1	Eurotatoria	1	unclassified_Eurotatoria	0.42	unclassified_Eurotatoria	0.42	unclassified_Eurotatoria	0.42	unclassified_Eurotatoria_sp	0.42	0	0	0	0	0	0	0	0	0	0	0	0	0	0	8	10	0	0	1	1	1	1	1	0	0	0	0	0	0	0	0	0	0	0
59a120a6eedbb35ec49186b9c2a471a83f00c6b0	#N/A	Metazoa	1	Rotifera	0.99	Eurotatoria	0.99	unclassified_Eurotatoria	0.42	unclassified_Eurotatoria	0.42	unclassified_Eurotatoria	0.42	unclassified_Eurotatoria_sp	0.41	0	0	0	0	0	0	0	0	0	0	0	0	0	0	0	0	0	0	0	0	0	0	0	0	0	0	0	0	0	0	0	0	0	0
373705397fdf56976444fab67b2271a4b9eb16ed	#N/A	Metazoa	1	Rotifera	1	Eurotatoria	1	unclassified_Eurotatoria	0.42	unclassified_Eurotatoria	0.42	unclassified_Eurotatoria	0.42	unclassified_Eurotatoria_sp	0.4	0	0	0	0	0	0	0	0	0	0	0	0	0	0	0	0	0	0	0	0	0	0	0	0	0	0	0	0	0	0	0	0	0	0
71576d8e5411cf895feef9e9b9dbb1eac4ad6f34	#N/A	Metazoa	1	Rotifera	1	Eurotatoria	1	unclassified_Eurotatoria	0.48	unclassified_Eurotatoria	0.43	unclassified_Eurotatoria	0.42	unclassified_Eurotatoria_sp	0.39	0	0	0	0	0	0	0	0	0	0	0	0	0	0	0	2	0	0	0	0	0	0	0	0	0	0	0	0	0	0	0	0	0	0
66ab8535d110f64710d2cad3842bee16dfa946b7	#N/A	Metazoa	1	Rotifera	1	Eurotatoria	1	unclassified_Eurotatoria	0.58	unclassified_Eurotatoria	0.47	unclassified_Eurotatoria	0.42	unclassified_Eurotatoria_sp	0.37	0	0	0	0	0	6	0	0	0	0	0	0	0	0	0	0	0	0	0	0	0	0	0	0	0	0	0	0	0	0	0	0	0	0
267f276430aea4a550aa39e93297cf7b371bcc9a	#N/A	Metazoa	1	Rotifera	1	Eurotatoria	1	unclassified_Eurotatoria	0.42	unclassified_Eurotatoria	0.42	unclassified_Eurotatoria	0.42	unclassified_Eurotatoria_sp	0.35	0	0	0	0	0	0	0	0	0	0	0	0	0	0	0	0	0	1	1	1	0	0	0	0	0	0	0	0	0	0	0	0	0	0
2b6e7e387537393aefe446bd5732c7fbc6a1a364	#N/A	Metazoa	0.98	Rotifera	0.88	Eurotatoria	0.88	unclassified_Eurotatoria	0.69	unclassified_Eurotatoria	0.57	unclassified_Eurotatoria	0.42	unclassified_Eurotatoria_sp	0.3	0	0	0	0	0	0	0	0	0	0	0	1	0	0	0	0	0	0	0	0	0	0	0	0	0	0	0	0	0	0	0	0	0	0
e80336eb507f1af0faeb35459e31f37e075424be	#N/A	Metazoa	1	Rotifera	1	Eurotatoria	1	unclassified_Eurotatoria	0.41	unclassified_Eurotatoria	0.41	unclassified_Eurotatoria	0.41	unclassified_Eurotatoria_sp	0.41	0	0	0	0	0	0	0	0	0	0	0	0	0	0	0	0	0	0	0	1	0	0	0	0	0	0	0	0	0	0	0	0	0	0
fe7c7c508a44b504ba6401dea7195cc5a8102ee5	#N/A	Metazoa	1	Rotifera	0.99	Eurotatoria	0.99	unclassified_Eurotatoria	0.41	unclassified_Eurotatoria	0.41	unclassified_Eurotatoria	0.41	unclassified_Eurotatoria_sp	0.41	0	0	0	0	0	0	0	1	0	0	0	0	0	0	0	0	0	0	0	0	0	0	0	0	0	0	0	0	0	0	0	0	0	0
c9ffa27d2afd80a6858d95a8890ea1c85c564e4b	#N/A	Metazoa	1	Rotifera	1	Eurotatoria	1	unclassified_Eurotatoria	0.41	unclassified_Eurotatoria	0.41	unclassified_Eurotatoria	0.41	unclassified_Eurotatoria_sp	0.41	0	0	0	0	0	0	0	0	0	0	0	0	0	0	0	0	0	0	0	0	0	0	0	4	0	0	0	0	0	0	0	0	0	0
150cdf3d4b0ed50b72a6afb402c10b02e079ce8c	#N/A	Metazoa	1	Rotifera	1	Eurotatoria	1	unclassified_Eurotatoria	0.41	unclassified_Eurotatoria	0.41	unclassified_Eurotatoria	0.41	unclassified_Eurotatoria_sp	0.41	0	0	5	0	0	1	0	0	0	0	0	0	0	0	0	0	0	0	0	0	0	0	0	0	0	0	0	0	0	0	0	8	0	0
94e27128c420ad5246f48332c70635cb8be1e697	#N/A	Metazoa	1	Rotifera	1	Eurotatoria	1	unclassified_Eurotatoria	0.41	unclassified_Eurotatoria	0.41	unclassified_Eurotatoria	0.41	unclassified_Eurotatoria_sp	0.41	0	0	0	0	0	0	0	0	0	0	0	0	0	17	7	0	0	0	0	0	0	0	0	0	0	0	0	0	0	0	0	0	0	0
f4d61013434cd632e8ad0f76817b88de16036adb	#N/A	Metazoa	1	Rotifera	1	Eurotatoria	1	unclassified_Eurotatoria	0.41	unclassified_Eurotatoria	0.41	unclassified_Eurotatoria	0.41	unclassified_Eurotatoria_sp	0.39	0	0	0	0	0	0	0	0	0	0	0	0	0	0	0	0	0	0	0	0	0	0	0	0	0	0	0	0	0	0	0	1	0	0
8e016209dac0c6acdc1a644092bf33d55bd6573b	#N/A	Metazoa	1	Rotifera	1	Eurotatoria	1	unclassified_Eurotatoria	0.41	unclassified_Eurotatoria	0.41	unclassified_Eurotatoria	0.41	unclassified_Eurotatoria_sp	0.28	0	0	0	0	0	0	0	0	0	0	0	0	0	0	0	0	0	0	0	0	0	0	0	0	0	0	0	0	0	0	0	0	0	0
b17bef15302fa104bb472aed16867a1c81a26155	#N/A	Metazoa	1	Rotifera	0.99	Eurotatoria	0.99	unclassified_Eurotatoria	0.4	unclassified_Eurotatoria	0.4	unclassified_Eurotatoria	0.4	unclassified_Eurotatoria_sp	0.39	0	0	0	0	0	0	0	0	0	0	0	0	0	0	0	0	0	0	0	0	0	0	0	0	0	0	0	0	0	0	0	0	0	0
fc6d8ea66d6afc7dbf05e1e00a548365efd6f8dd	#N/A	Metazoa	1	Rotifera	1	Eurotatoria	1	unclassified_Eurotatoria	0.4	unclassified_Eurotatoria	0.4	unclassified_Eurotatoria	0.4	unclassified_Eurotatoria_sp	0.38	0	0	0	0	0	0	0	0	0	0	0	0	0	0	0	0	0	0	0	0	0	0	0	0	0	0	1	0	0	0	0	0	0	0
117308e86e804d8b141cde2fc850301a64f70525	#N/A	Metazoa	1	Rotifera	1	Eurotatoria	1	unclassified_Eurotatoria	0.52	unclassified_Eurotatoria	0.4	unclassified_Eurotatoria	0.4	unclassified_Eurotatoria_sp	0.38	0	0	0	0	0	0	0	0	0	0	0	9	1	0	0	0	0	0	0	1	0	0	0	0	0	0	0	0	0	0	0	0	0	0
3f49c8eb6774cb54ab45983beaa06739b1f93296	#N/A	Metazoa	1	Rotifera	0.96	Eurotatoria	0.96	unclassified_Eurotatoria	0.4	unclassified_Eurotatoria	0.4	unclassified_Eurotatoria	0.4	unclassified_Eurotatoria_sp	0.36	0	0	0	0	0	0	0	0	0	0	0	0	0	0	0	0	0	0	0	0	0	0	0	0	0	0	0	0	0	0	0	0	0	0
11ad05010a554a3149eac0444a278af98f172f3c	#N/A	Metazoa	1	Rotifera	1	Eurotatoria	1	unclassified_Eurotatoria	0.4	unclassified_Eurotatoria	0.4	unclassified_Eurotatoria	0.4	unclassified_Eurotatoria_sp	0.36	0	0	0	0	0	0	0	0	0	1	0	0	0	0	0	1	0	0	0	0	0	0	0	0	0	0	0	0	0	0	0	0	0	0
48d299ed79a929a2c11895c32fd6ad9761bf8671	#N/A	Metazoa	1	Rotifera	1	Eurotatoria	1	unclassified_Eurotatoria	0.4	unclassified_Eurotatoria	0.4	unclassified_Eurotatoria	0.4	unclassified_Eurotatoria_sp	0.26	0	0	0	0	0	0	0	0	0	0	0	0	0	0	0	0	0	0	0	0	1	0	0	0	0	0	0	0	0	0	0	0	0	0
4750a3eb151fbac284638885309144cb23c0dc81	#N/A	Metazoa	1	Rotifera	1	Eurotatoria	1	unclassified_Eurotatoria	0.53	unclassified_Eurotatoria	0.41	unclassified_Eurotatoria	0.4	unclassified_Eurotatoria_sp	0.22	0	0	0	0	0	0	0	0	0	0	0	0	0	0	0	0	0	0	0	0	0	0	0	0	0	0	0	0	0	0	0	0	0	0
8f44fe71c3d377a5ba24a3296bfe7684aaad3719	#N/A	Metazoa	1	Rotifera	0.89	Eurotatoria	0.89	unclassified_Eurotatoria	0.68	unclassified_Eurotatoria	0.55	unclassified_Eurotatoria	0.4	unclassified_Eurotatoria_sp	0.18	0	0	0	0	0	0	0	0	0	0	0	0	0	0	0	0	0	0	0	0	0	0	0	0	0	0	0	0	0	0	0	0	0	0
0305433b0df56f6e03e86152369b15afa1a669a6	#N/A	Metazoa	1	Rotifera	1	Eurotatoria	1	unclassified_Eurotatoria	0.39	unclassified_Eurotatoria	0.39	unclassified_Eurotatoria	0.39	unclassified_Eurotatoria_sp	0.39	0	0	0	0	0	0	0	0	0	0	0	0	0	0	0	0	1	0	0	0	0	0	0	0	0	0	0	0	0	0	0	0	0	0
5e993f6367d7cfb57387a61288c73cf281dc28d8	#N/A	Metazoa	1	Rotifera	0.99	Eurotatoria	0.99	unclassified_Eurotatoria	0.39	unclassified_Eurotatoria	0.39	unclassified_Eurotatoria	0.39	unclassified_Eurotatoria_sp	0.38	0	0	0	0	0	0	0	0	0	0	0	1	0	0	0	0	0	0	0	0	0	0	0	0	0	0	0	0	0	0	0	0	0	0
7d4dc3274c8ffed909dc203e63417d35debb41e0	#N/A	Metazoa	1	Rotifera	0.98	Eurotatoria	0.98	unclassified_Eurotatoria	0.51	unclassified_Eurotatoria	0.48	unclassified_Eurotatoria	0.39	unclassified_Eurotatoria_sp	0.38	0	0	0	0	0	0	0	1	0	0	0	0	0	0	0	0	0	0	0	0	0	0	0	0	0	0	0	0	0	0	0	0	0	0
b1348e2d930480e30ffa5378b4532ed689cf1e2c	#N/A	Metazoa	1	Rotifera	1	Eurotatoria	1	unclassified_Eurotatoria	0.39	unclassified_Eurotatoria	0.39	unclassified_Eurotatoria	0.39	unclassified_Eurotatoria_sp	0.37	0	0	0	0	0	0	0	0	0	0	0	0	0	0	0	0	0	1	0	0	0	0	0	0	0	0	0	0	0	0	0	0	0	0
4c4e25426177281fe179e216a1086eb733fb8b2b	#N/A	Metazoa	1	Rotifera	1	Eurotatoria	1	unclassified_Eurotatoria	0.66	unclassified_Eurotatoria	0.57	unclassified_Eurotatoria	0.39	unclassified_Eurotatoria_sp	0.36	0	0	0	0	0	0	0	0	0	0	0	0	0	0	0	0	0	0	0	1	0	0	0	0	0	0	0	0	0	0	0	0	0	0
9ce4f3785ec2fac9305f1e835d5897d80df31d0a	#N/A	Metazoa	1	Rotifera	0.97	Eurotatoria	0.97	unclassified_Eurotatoria	0.39	unclassified_Eurotatoria	0.39	unclassified_Eurotatoria	0.39	unclassified_Eurotatoria_sp	0.36	0	0	0	0	0	0	0	0	0	0	0	1	0	0	0	0	0	0	0	0	0	0	0	0	0	0	0	0	0	0	0	0	0	0
186f12c1d5cc90bd288eff9f7eaba8a2c37c7a1d	#N/A	Metazoa	1	Rotifera	0.96	Eurotatoria	0.96	unclassified_Eurotatoria	0.73	unclassified_Eurotatoria	0.39	unclassified_Eurotatoria	0.39	unclassified_Eurotatoria_sp	0.28	0	0	0	0	0	0	0	0	0	0	0	0	0	0	0	0	0	0	0	0	0	0	0	0	0	0	0	0	0	0	0	0	0	0
7c1c9529d3170fc5bbd75e0d0c0af21682af62a5	#N/A	Metazoa	0.99	Rotifera	0.86	Eurotatoria	0.86	unclassified_Eurotatoria	0.64	unclassified_Eurotatoria	0.44	unclassified_Eurotatoria	0.39	unclassified_Eurotatoria_sp	0.14	0	1	0	0	0	0	0	0	0	0	0	0	0	0	0	0	0	0	0	0	0	0	0	0	0	0	0	0	0	0	0	0	0	0
8ebc6e3e5288ae47d270280d76d4c7d6801c77ec	#N/A	Metazoa	0.99	Rotifera	0.98	Eurotatoria	0.98	unclassified_Eurotatoria	0.38	unclassified_Eurotatoria	0.38	unclassified_Eurotatoria	0.38	unclassified_Eurotatoria_sp	0.38	0	0	0	0	0	0	0	0	0	0	0	0	0	0	0	0	0	0	0	1	0	0	0	0	0	0	0	0	0	0	0	0	0	0
e0be74c3a44b70c6329cfa1c9b83c06905588c2a	#N/A	Metazoa	1	Rotifera	1	Eurotatoria	1	unclassified_Eurotatoria	0.38	unclassified_Eurotatoria	0.38	unclassified_Eurotatoria	0.38	unclassified_Eurotatoria_sp	0.38	0	0	0	0	0	0	0	0	0	0	0	0	0	0	0	10	0	0	0	0	0	0	0	0	0	0	0	0	0	0	0	0	0	0
23ced06366fade987b21bcb83ba56f32efe54753	#N/A	Metazoa	1	Rotifera	1	Eurotatoria	1	unclassified_Eurotatoria	0.38	unclassified_Eurotatoria	0.38	unclassified_Eurotatoria	0.38	unclassified_Eurotatoria_sp	0.38	1	0	0	0	0	0	0	0	0	0	0	0	0	0	0	0	0	0	0	0	0	0	0	0	0	0	0	0	0	0	0	0	0	0
6212b68c3cd9abca1e3717a0a584536e5c69680a	#N/A	Metazoa	1	Rotifera	1	Eurotatoria	1	unclassified_Eurotatoria	0.38	unclassified_Eurotatoria	0.38	unclassified_Eurotatoria	0.38	unclassified_Eurotatoria_sp	0.37	0	0	0	0	0	0	0	0	0	0	0	0	0	0	0	0	0	0	0	0	0	0	0	0	0	0	0	0	0	0	0	0	0	0
fcf3669f57e8c967558bd8c6f3c0761724ec156b	#N/A	Metazoa	1	Rotifera	1	Eurotatoria	1	unclassified_Eurotatoria	0.38	unclassified_Eurotatoria	0.38	unclassified_Eurotatoria	0.38	unclassified_Eurotatoria_sp	0.36	0	0	0	0	0	0	0	0	0	0	0	0	0	0	0	0	0	0	1	0	0	0	0	0	0	0	0	0	0	0	0	0	0	0
9f7d85fca5c1ffa89fdd09967ef1c4ac8def9bc9	#N/A	Metazoa	1	Rotifera	1	Eurotatoria	1	unclassified_Eurotatoria	0.37	unclassified_Eurotatoria	0.37	unclassified_Eurotatoria	0.37	unclassified_Eurotatoria_sp	0.37	0	0	0	1	0	0	0	0	0	0	0	0	0	0	0	0	0	0	0	0	0	0	0	0	0	0	0	0	0	0	0	0	0	0
27bf479857754defe98582dc8e8ad488907bc282	#N/A	Metazoa	1	Rotifera	1	Eurotatoria	1	unclassified_Eurotatoria	0.37	unclassified_Eurotatoria	0.37	unclassified_Eurotatoria	0.37	unclassified_Eurotatoria_sp	0.37	0	0	0	0	0	0	0	0	0	0	0	1	0	0	3	1	0	0	0	0	0	0	0	0	0	0	0	0	0	0	0	0	0	0
a9e3c051a04098506d6505220a1265c1d4ef8995	#N/A	Metazoa	1	Rotifera	1	Eurotatoria	1	unclassified_Eurotatoria	0.37	unclassified_Eurotatoria	0.37	unclassified_Eurotatoria	0.37	unclassified_Eurotatoria_sp	0.37	0	0	0	0	0	0	0	0	0	0	0	0	6	0	0	0	0	0	0	0	0	0	0	0	0	0	0	0	0	0	0	0	0	0
86063f74219b543895546e90e9855af669acbc1c	#N/A	Metazoa	1	Rotifera	0.88	Eurotatoria	0.88	unclassified_Eurotatoria	0.49	unclassified_Eurotatoria	0.37	unclassified_Eurotatoria	0.37	unclassified_Eurotatoria_sp	0.36	0	0	0	0	0	0	0	0	0	0	0	0	0	0	0	0	0	0	0	1	0	0	0	0	0	0	0	0	0	0	0	0	0	0
c6f289e7b1abcee652d6e563c245a14b36e4ee0c	#N/A	Metazoa	1	Rotifera	1	Eurotatoria	1	unclassified_Eurotatoria	0.38	unclassified_Eurotatoria	0.38	unclassified_Eurotatoria	0.37	unclassified_Eurotatoria_sp	0.36	0	0	0	0	0	0	0	1	0	0	0	0	0	0	0	0	0	0	0	0	0	0	0	0	0	0	0	0	0	0	0	0	0	0
be2423e8ee25361a1b3cfddafbc7811d63969afe	#N/A	Metazoa	1	Rotifera	0.94	Eurotatoria	0.94	unclassified_Eurotatoria	0.77	unclassified_Eurotatoria	0.53	unclassified_Eurotatoria	0.37	unclassified_Eurotatoria_sp	0.35	0	0	0	0	0	0	0	0	0	0	0	0	0	0	0	0	0	0	0	0	0	0	0	0	0	0	0	0	0	0	0	0	0	0
fa558a4f9ee8f56722c08fb23de97e6786dc96c9	#N/A	Metazoa	1	Rotifera	0.91	Eurotatoria	0.91	unclassified_Eurotatoria	0.78	unclassified_Eurotatoria	0.64	unclassified_Eurotatoria	0.37	unclassified_Eurotatoria_sp	0.35	0	0	0	0	0	0	0	0	0	0	0	0	0	0	0	0	0	0	0	0	0	0	0	0	0	0	0	0	0	0	0	1	0	0
a73e1ab26096be140ce0cc78b6bdbeb6fee28860	#N/A	Metazoa	1	Rotifera	1	Eurotatoria	1	unclassified_Eurotatoria	0.37	unclassified_Eurotatoria	0.37	unclassified_Eurotatoria	0.37	unclassified_Eurotatoria_sp	0.34	1	0	0	0	0	0	0	0	0	0	0	0	0	33	0	4	23	0	0	0	0	0	0	1	0	0	0	0	0	0	0	0	0	0
42d1560e82cff5443ccde5318cda15847e93db13	#N/A	Metazoa	1	Rotifera	1	Eurotatoria	1	unclassified_Eurotatoria	0.37	unclassified_Eurotatoria	0.37	unclassified_Eurotatoria	0.37	unclassified_Eurotatoria_sp	0.33	0	0	0	0	1	0	0	0	0	0	0	0	0	0	0	0	0	0	0	0	0	0	0	0	0	0	0	0	0	0	0	0	0	0
560b6d92a2dcace30195b768744e876a09a8f25e	#N/A	Metazoa	1	Rotifera	0.99	Eurotatoria	0.99	unclassified_Eurotatoria	0.37	unclassified_Eurotatoria	0.37	unclassified_Eurotatoria	0.37	unclassified_Eurotatoria_sp	0.31	1	0	0	0	0	0	0	0	0	0	0	0	0	0	0	0	0	0	0	0	0	0	0	0	0	0	0	0	0	0	0	0	0	0
f41bbf0a27f6e6ee0ac8710c0937eaae4e1a7443	#N/A	Metazoa	1	Rotifera	1	Eurotatoria	1	unclassified_Eurotatoria	0.36	unclassified_Eurotatoria	0.36	unclassified_Eurotatoria	0.36	unclassified_Eurotatoria_sp	0.36	0	0	0	0	0	0	0	1	0	0	0	0	0	0	0	0	0	0	0	0	0	0	0	0	0	0	0	0	0	0	0	0	0	0
cf447688204d19cce8633d64b45f7fea3bd74a99	#N/A	Metazoa	0.97	Rotifera	0.82	Eurotatoria	0.82	unclassified_Eurotatoria	0.77	unclassified_Eurotatoria	0.52	unclassified_Eurotatoria	0.36	unclassified_Eurotatoria_sp	0.35	0	0	0	0	0	0	0	0	0	0	0	0	0	0	0	0	0	1	0	0	0	0	0	0	0	0	0	0	0	0	0	0	0	0
777dc96c29dfb1ae3841a2938823435226b346d1	#N/A	Metazoa	1	Rotifera	1	Eurotatoria	1	unclassified_Eurotatoria	0.36	unclassified_Eurotatoria	0.36	unclassified_Eurotatoria	0.36	unclassified_Eurotatoria_sp	0.35	0	0	0	0	0	0	0	0	0	0	0	0	0	0	0	0	0	0	0	0	0	0	0	0	0	0	2	0	0	0	0	0	0	0
43d2d78e9c25dd69dd025fde2e2111c9593b70e8	#N/A	Metazoa	1	Rotifera	1	Eurotatoria	1	unclassified_Eurotatoria	0.36	unclassified_Eurotatoria	0.36	unclassified_Eurotatoria	0.36	unclassified_Eurotatoria_sp	0.34	0	0	0	0	0	0	0	0	0	0	0	0	0	0	0	0	0	0	0	0	0	0	0	0	0	0	0	0	0	0	0	0	0	0
c7a106fdbccd3a71892af458590af24a2e17a0ae	#N/A	Metazoa	1	Rotifera	1	Eurotatoria	1	unclassified_Eurotatoria	0.36	unclassified_Eurotatoria	0.36	unclassified_Eurotatoria	0.36	unclassified_Eurotatoria_sp	0.34	0	0	0	0	0	0	0	0	0	0	0	0	0	0	0	0	0	0	0	0	0	0	0	12	0	0	5	0	0	0	0	0	0	0
63a24820fb585ee82585af5706617591430b41df	#N/A	Metazoa	0.93	Rotifera	0.85	Eurotatoria	0.85	unclassified_Eurotatoria	0.73	unclassified_Eurotatoria	0.53	unclassified_Eurotatoria	0.36	unclassified_Eurotatoria_sp	0.29	0	0	0	0	0	0	0	0	0	0	0	0	0	0	0	0	0	0	0	0	0	0	0	0	0	0	0	0	0	0	0	0	0	0
0ce486bdb4a32725519dd827349a7a74097d7c2a	#N/A	Metazoa	1	Rotifera	1	Eurotatoria	1	unclassified_Eurotatoria	0.37	unclassified_Eurotatoria	0.37	unclassified_Eurotatoria	0.36	unclassified_Eurotatoria_sp	0.28	0	0	0	0	0	0	0	0	0	0	0	1	0	0	0	0	0	0	0	0	0	0	0	0	0	0	0	0	0	0	0	0	0	0
ae43f1f71aaa713dc4501c3fc455ca44925290f1	#N/A	Metazoa	1	Rotifera	1	Eurotatoria	1	unclassified_Eurotatoria	0.36	unclassified_Eurotatoria	0.36	unclassified_Eurotatoria	0.36	unclassified_Eurotatoria_sp	0.27	0	0	0	0	0	0	0	0	0	0	0	0	0	0	0	0	0	0	0	0	0	0	0	0	0	1	0	0	0	0	0	0	0	0
145114346906a91a66e49c80e239f87bf467e6c3	#N/A	Metazoa	1	Rotifera	1	Eurotatoria	1	unclassified_Eurotatoria	0.35	unclassified_Eurotatoria	0.35	unclassified_Eurotatoria	0.35	unclassified_Eurotatoria_sp	0.35	0	0	0	0	0	0	0	0	0	0	0	0	0	0	0	0	0	1	0	0	0	0	0	0	0	0	0	0	0	0	0	0	0	0
372943e2f3e2f7d82ef117e2ee8c2a3fe8cdc0ce	#N/A	Metazoa	1	Rotifera	1	Eurotatoria	1	unclassified_Eurotatoria	0.35	unclassified_Eurotatoria	0.35	unclassified_Eurotatoria	0.35	unclassified_Eurotatoria_sp	0.35	1	0	0	0	0	0	0	0	0	0	0	0	0	0	0	0	0	0	0	0	0	0	0	0	0	0	0	0	0	0	0	0	0	0
6aac164f70e9daeea77b235e7587d68e999ae286	#N/A	Metazoa	1	Rotifera	1	Eurotatoria	1	unclassified_Eurotatoria	0.59	unclassified_Eurotatoria	0.59	unclassified_Eurotatoria	0.35	unclassified_Eurotatoria_sp	0.35	0	0	0	0	0	0	0	0	0	0	0	0	1	0	1	0	0	0	0	0	0	0	0	0	0	0	0	0	0	0	0	0	0	0
efea5ba7c8ae7ecbe66430f2d3129cf83c225543	#N/A	Metazoa	1	Rotifera	1	Eurotatoria	1	unclassified_Eurotatoria	0.4	unclassified_Eurotatoria	0.37	unclassified_Eurotatoria	0.35	unclassified_Eurotatoria_sp	0.34	1	0	0	0	0	0	0	0	0	0	0	0	0	0	0	0	0	0	0	0	0	0	0	0	0	0	0	0	0	0	0	0	0	0
f54dc7da6ccd781a352670a0cfd2a82e4d7a73cf	#N/A	Metazoa	1	Rotifera	0.96	Eurotatoria	0.96	unclassified_Eurotatoria	0.35	unclassified_Eurotatoria	0.35	unclassified_Eurotatoria	0.35	unclassified_Eurotatoria_sp	0.34	0	0	0	0	0	0	0	0	0	0	0	0	0	0	0	1	0	0	0	0	0	0	0	0	0	0	0	0	0	0	0	0	0	0
15fc48581677bd3e9b1d464273ee3f92e0b0b152	#N/A	Metazoa	0.95	Rotifera	0.84	Eurotatoria	0.84	unclassified_Eurotatoria	0.76	unclassified_Eurotatoria	0.58	unclassified_Eurotatoria	0.35	unclassified_Eurotatoria_sp	0.33	0	0	0	0	0	0	0	0	0	0	0	0	0	0	0	0	0	0	0	0	0	0	0	0	0	0	0	0	0	0	0	0	0	0
52f1b5cc29ec9430489e1ff05185e63124c4335c	#N/A	Metazoa	1	Rotifera	0.99	Eurotatoria	0.99	unclassified_Eurotatoria	0.35	unclassified_Eurotatoria	0.35	unclassified_Eurotatoria	0.35	unclassified_Eurotatoria_sp	0.33	0	0	0	0	0	0	0	0	0	0	0	0	0	0	0	0	0	0	0	0	0	0	0	0	0	0	0	0	0	0	0	0	0	0
fea127aeb7cf34a8fbd693f3e3e093228133acca	#N/A	Metazoa	1	Rotifera	1	Eurotatoria	1	unclassified_Eurotatoria	0.54	unclassified_Eurotatoria	0.46	unclassified_Eurotatoria	0.35	unclassified_Eurotatoria_sp	0.33	0	0	0	0	0	0	0	0	0	0	0	0	0	0	0	0	0	0	0	0	0	0	0	0	0	0	0	0	0	0	0	0	0	0
f6805b5ee14202bbc3540447aca01e517d5c555e	#N/A	Metazoa	1	Rotifera	1	Eurotatoria	1	unclassified_Eurotatoria	0.79	unclassified_Eurotatoria	0.52	unclassified_Eurotatoria	0.34	unclassified_Eurotatoria_sp	0.27	0	0	1	0	0	0	0	0	0	0	0	0	0	0	0	0	0	0	0	0	0	0	0	0	0	0	0	0	0	0	0	0	0	0
4d4ca8ddc115801a35315f31ddd0f64db026074e	#N/A	Metazoa	1	Rotifera	1	Eurotatoria	1	unclassified_Eurotatoria	0.34	unclassified_Eurotatoria	0.34	unclassified_Eurotatoria	0.34	unclassified_Eurotatoria_sp	0.19	0	0	0	0	0	0	0	0	0	0	0	0	0	0	0	0	0	0	0	0	0	0	0	0	0	0	0	0	0	0	0	0	0	0
b97b1edffdf790c5a8015b6bdb4fd83368ac09da	#N/A	Metazoa	1	Rotifera	0.94	Eurotatoria	0.94	unclassified_Eurotatoria	0.34	unclassified_Eurotatoria	0.34	unclassified_Eurotatoria	0.34	unclassified_Eurotatoria_sp	0.15	0	0	1	0	0	0	0	0	0	0	0	0	0	0	0	0	0	0	0	0	0	0	0	0	0	0	0	0	0	0	0	0	0	0
791deed0acc37112fe9f61401dc723d09828a7b3	#N/A	Metazoa	0.95	Rotifera	0.8	Eurotatoria	0.8	unclassified_Eurotatoria	0.6	unclassified_Eurotatoria	0.44	unclassified_Eurotatoria	0.34	unclassified_Eurotatoria_sp	0.14	0	0	0	0	0	0	0	0	0	0	0	0	0	0	0	0	0	0	0	0	0	0	0	0	0	0	0	0	0	0	0	0	0	0
a23072ad913766444e408a079a306ad52dffd82f	#N/A	Metazoa	1	Rotifera	1	Eurotatoria	1	unclassified_Eurotatoria	0.33	unclassified_Eurotatoria	0.33	unclassified_Eurotatoria	0.33	unclassified_Eurotatoria_sp	0.33	0	0	0	0	0	0	0	0	0	0	0	11	0	0	0	0	0	0	0	0	0	0	0	0	0	0	0	0	0	0	0	0	0	0
2e92503181064b555e4cddfd1af6aa0e6a331284	#N/A	Metazoa	1	Rotifera	1	Eurotatoria	1	unclassified_Eurotatoria	0.37	unclassified_Eurotatoria	0.36	unclassified_Eurotatoria	0.33	unclassified_Eurotatoria_sp	0.32	0	0	0	0	0	0	0	0	0	0	0	0	1	0	0	1	0	0	0	0	0	0	0	0	0	0	0	0	0	0	0	0	0	0
41e77863c3ca3424b87bd4f4c86931bcd7025672	#N/A	Metazoa	1	Rotifera	0.84	Eurotatoria	0.84	unclassified_Eurotatoria	0.72	unclassified_Eurotatoria	0.59	unclassified_Eurotatoria	0.33	unclassified_Eurotatoria_sp	0.31	0	0	0	0	0	0	0	0	0	0	0	0	0	1	0	0	0	0	0	0	0	0	0	0	0	0	0	0	0	0	0	0	0	0
2d84a9ad6160e137c63e80aa0ca278ae7d586436	#N/A	Metazoa	1	Rotifera	0.87	Eurotatoria	0.87	unclassified_Eurotatoria	0.33	unclassified_Eurotatoria	0.33	unclassified_Eurotatoria	0.33	unclassified_Eurotatoria_sp	0.27	0	0	1	0	0	0	0	0	0	0	0	0	0	0	0	0	0	0	0	0	0	0	0	0	0	0	0	0	0	0	0	0	0	0
11c2c08209b12d175fd7d83c5e9fad948c1c8e5b	#N/A	Metazoa	1	Rotifera	1	Eurotatoria	1	unclassified_Eurotatoria	0.33	unclassified_Eurotatoria	0.33	unclassified_Eurotatoria	0.33	unclassified_Eurotatoria_sp	0.26	0	0	0	0	1	4	0	0	0	0	0	0	0	1	0	0	0	0	0	0	0	0	0	0	0	0	0	0	0	0	0	0	0	0
d5f2e8c68d9d885d23a831d56a7b9145138fc104	#N/A	Metazoa	0.99	Rotifera	0.98	Eurotatoria	0.98	unclassified_Eurotatoria	0.71	unclassified_Eurotatoria	0.48	unclassified_Eurotatoria	0.33	unclassified_Eurotatoria_sp	0.21	0	0	0	0	0	0	0	0	0	0	0	1	0	0	0	0	0	0	0	0	0	0	0	0	0	0	0	0	0	0	0	0	0	0
b7f2fde5a5c995fda51b45af741add93da8836c0	#N/A	Metazoa	1	Rotifera	1	Eurotatoria	1	unclassified_Eurotatoria	0.62	unclassified_Eurotatoria	0.5	unclassified_Eurotatoria	0.33	unclassified_Eurotatoria_sp	0.2	0	0	0	1	0	0	0	0	0	0	0	0	0	0	0	0	0	0	0	0	0	0	0	0	0	0	0	0	0	0	0	0	0	0
aeb42f230ca9326d5c1996b956795bbef7bd37eb	#N/A	Metazoa	0.99	Rotifera	0.98	Eurotatoria	0.98	unclassified_Eurotatoria	0.32	unclassified_Eurotatoria	0.32	unclassified_Eurotatoria	0.32	unclassified_Eurotatoria_sp	0.32	0	0	0	0	0	0	0	0	0	0	0	0	0	0	0	0	0	0	0	0	0	0	0	1	0	0	0	0	0	0	0	0	0	0
770fd6d77bfb33899c626b735e607d7e9ebb2c12	#N/A	Metazoa	1	Rotifera	1	Eurotatoria	1	unclassified_Eurotatoria	0.42	unclassified_Eurotatoria	0.36	unclassified_Eurotatoria	0.32	unclassified_Eurotatoria_sp	0.32	1	1	2	3	1	1	0	0	2	0	0	0	0	0	0	0	0	0	0	0	0	0	0	0	0	0	0	0	0	0	0	0	0	0
f4dc70d9b6f392be5ce77983ffd346a5b246545c	#N/A	Metazoa	1	Rotifera	0.98	Eurotatoria	0.98	unclassified_Eurotatoria	0.32	unclassified_Eurotatoria	0.32	unclassified_Eurotatoria	0.32	unclassified_Eurotatoria_sp	0.32	0	0	0	0	0	0	0	0	0	0	0	0	0	0	12	5	0	0	0	0	0	0	0	0	0	0	0	0	0	0	0	0	0	0
3a687c919a31c5b442d71ff45ffdc6164d975fa5	#N/A	Metazoa	1	Rotifera	1	Eurotatoria	1	unclassified_Eurotatoria	0.32	unclassified_Eurotatoria	0.32	unclassified_Eurotatoria	0.32	unclassified_Eurotatoria_sp	0.32	0	0	0	0	0	0	1	0	1	0	0	4	0	0	6	0	1	0	0	1	0	0	0	0	0	0	0	0	0	0	0	0	0	0
3b33b9f3e4694bc99cf4743c63449a57343709ed	#N/A	Metazoa	0.99	Rotifera	0.98	Eurotatoria	0.98	unclassified_Eurotatoria	0.32	unclassified_Eurotatoria	0.32	unclassified_Eurotatoria	0.32	unclassified_Eurotatoria_sp	0.31	1	0	0	0	0	0	0	0	0	0	0	0	1	0	0	0	0	0	0	0	0	0	0	0	0	0	0	0	0	0	0	0	0	0
2d66ac6465020d4bb91b52faed828759c6b73b75	#N/A	Metazoa	1	Rotifera	1	Eurotatoria	1	unclassified_Eurotatoria	0.69	unclassified_Eurotatoria	0.5	unclassified_Eurotatoria	0.32	unclassified_Eurotatoria_sp	0.28	0	0	0	0	0	0	0	0	0	0	0	0	0	0	0	0	0	0	0	0	0	0	0	0	0	0	0	0	0	0	0	0	0	0
4666ce4654e3c84d0e2ad328c8bce29c74887fc2	#N/A	Metazoa	1	Rotifera	0.99	Eurotatoria	0.99	unclassified_Eurotatoria	0.63	unclassified_Eurotatoria	0.61	unclassified_Eurotatoria	0.32	unclassified_Eurotatoria_sp	0.28	0	0	0	0	0	0	0	0	0	0	0	0	0	0	0	0	0	0	0	3	0	0	0	0	0	0	0	0	0	0	0	0	0	0
0a85608a71f81531d09aab6c85eab10570495300	#N/A	Metazoa	1	Rotifera	1	Eurotatoria	1	unclassified_Eurotatoria	0.32	unclassified_Eurotatoria	0.32	unclassified_Eurotatoria	0.32	unclassified_Eurotatoria_sp	0.26	0	0	0	0	0	0	0	0	0	0	0	0	0	0	0	0	0	0	0	0	0	0	1	0	0	0	0	0	0	0	0	0	0	0
6f0a686459be14bc307f4237716dfd93c3ab98c8	#N/A	Metazoa	1	Rotifera	1	Eurotatoria	1	unclassified_Eurotatoria	0.54	unclassified_Eurotatoria	0.44	unclassified_Eurotatoria	0.32	unclassified_Eurotatoria_sp	0.25	0	0	0	0	0	0	0	0	0	0	0	0	0	0	0	0	0	0	0	0	0	0	0	0	0	0	0	0	0	0	0	0	0	0
299e6eccf1d9049c466abe711784d9a670dcbde7	#N/A	Metazoa	1	Rotifera	0.9	Eurotatoria	0.9	unclassified_Eurotatoria	0.57	unclassified_Eurotatoria	0.32	unclassified_Eurotatoria	0.32	unclassified_Eurotatoria_sp	0.22	0	0	0	0	0	0	0	0	0	0	0	0	0	0	0	0	0	0	0	0	0	0	0	0	0	0	0	0	0	0	0	0	0	0
b600f105b247e7ec61f80217554719fbb2c60110	#N/A	Metazoa	1	Rotifera	0.99	Eurotatoria	0.99	unclassified_Eurotatoria	0.6	unclassified_Eurotatoria	0.56	unclassified_Eurotatoria	0.32	unclassified_Eurotatoria_sp	0.22	0	0	0	0	0	0	0	0	0	0	0	0	0	0	0	0	0	0	0	0	1	0	0	0	0	0	0	0	0	0	0	0	0	0
0a9c90a3cdc359574a98138c664f94759982ff90	#N/A	Metazoa	1	Rotifera	0.98	Eurotatoria	0.98	unclassified_Eurotatoria	0.54	unclassified_Eurotatoria	0.51	unclassified_Eurotatoria	0.32	unclassified_Eurotatoria_sp	0.16	0	0	0	0	0	1	0	0	0	0	0	0	0	0	0	0	0	0	0	0	0	0	0	0	0	0	0	0	0	0	0	0	0	0
11906f742968ba9f6e88e4e7095d656060f03838	#N/A	Metazoa	1	Rotifera	1	Eurotatoria	1	unclassified_Eurotatoria	0.32	unclassified_Eurotatoria	0.32	unclassified_Eurotatoria	0.31	unclassified_Eurotatoria_sp	0.3	1	0	0	0	0	0	0	0	0	0	0	0	0	0	0	1	0	0	0	0	0	0	0	0	0	0	0	0	0	0	0	0	0	0
9d4658686372c0922bd96899959d8b7f3081757e	#N/A	Metazoa	1	Rotifera	0.99	Eurotatoria	0.99	unclassified_Eurotatoria	0.31	unclassified_Eurotatoria	0.31	unclassified_Eurotatoria	0.31	unclassified_Eurotatoria_sp	0.28	0	0	0	0	0	0	0	0	0	0	0	0	1	0	0	0	0	0	0	0	0	0	0	0	0	0	0	0	0	0	0	0	0	0
23bc7b73beac184879281dd4541c5714d8cb04e0	#N/A	Metazoa	1	Rotifera	1	Eurotatoria	1	unclassified_Eurotatoria	0.31	unclassified_Eurotatoria	0.31	unclassified_Eurotatoria	0.31	unclassified_Eurotatoria_sp	0.27	0	0	0	0	0	0	0	0	0	0	0	0	0	0	0	0	0	0	0	0	0	0	0	0	0	0	1	0	0	0	0	0	0	0
255cbceffe1f4c7cd2ad5ceec01faf1162f4f3f7	#N/A	Metazoa	1	Rotifera	1	Eurotatoria	1	unclassified_Eurotatoria	0.43	unclassified_Eurotatoria	0.31	unclassified_Eurotatoria	0.31	unclassified_Eurotatoria_sp	0.24	0	0	0	0	0	0	0	0	0	0	0	0	0	0	0	0	0	0	0	0	0	0	0	0	0	0	0	0	0	0	0	0	0	0
d4ced6319f7d97490cc9fd9483e1a58389a3da44	#N/A	Metazoa	1	Rotifera	1	Eurotatoria	1	unclassified_Eurotatoria	0.59	unclassified_Eurotatoria	0.41	unclassified_Eurotatoria	0.31	unclassified_Eurotatoria_sp	0.13	0	0	0	0	0	0	0	0	0	0	0	0	0	0	0	0	0	0	0	0	0	0	0	0	0	0	0	0	0	0	0	1	0	0
b1bf16f50986942312ceb150894c4e3c2aac8977	#N/A	Metazoa	1	Rotifera	1	Eurotatoria	1	unclassified_Eurotatoria	0.3	unclassified_Eurotatoria	0.3	unclassified_Eurotatoria	0.3	unclassified_Eurotatoria_sp	0.3	0	0	0	0	0	0	0	0	0	0	0	1	0	0	0	0	0	0	0	0	0	0	0	0	0	0	0	0	0	0	0	0	0	0
290964a161b4e0f6657864634e3f65181835428b	#N/A	Metazoa	1	Rotifera	1	Eurotatoria	1	unclassified_Eurotatoria	0.3	unclassified_Eurotatoria	0.3	unclassified_Eurotatoria	0.3	unclassified_Eurotatoria_sp	0.3	0	0	0	0	0	0	0	0	0	0	0	0	0	1	3	1	3	0	0	0	0	0	0	0	0	0	0	0	0	0	0	0	0	0
7f1035810172cee11cfd4a256e3f1faac3ff68bf	#N/A	Metazoa	1	Rotifera	1	Eurotatoria	1	unclassified_Eurotatoria	0.42	unclassified_Eurotatoria	0.4	unclassified_Eurotatoria	0.3	unclassified_Eurotatoria_sp	0.28	0	0	0	0	0	0	0	0	0	0	0	0	0	0	0	0	0	0	0	0	0	0	0	1	0	0	0	0	0	0	0	0	0	0
3fd68457feb7752d2f4227e9de1be292bf981999	#N/A	Metazoa	1	Rotifera	0.99	Eurotatoria	0.99	unclassified_Eurotatoria	0.45	unclassified_Eurotatoria	0.39	unclassified_Eurotatoria	0.29	unclassified_Eurotatoria_sp	0.29	0	0	0	0	0	0	0	0	0	0	0	0	0	0	1	0	0	0	0	0	0	0	0	0	0	0	0	0	0	0	0	0	0	0
57c1bab4e735e7d0d54b5e30572ad01a80c5e8aa	#N/A	Metazoa	1	Rotifera	0.93	Eurotatoria	0.93	unclassified_Eurotatoria	0.69	unclassified_Eurotatoria	0.46	unclassified_Eurotatoria	0.29	unclassified_Eurotatoria_sp	0.29	0	0	0	0	0	0	0	0	0	0	0	0	0	0	0	0	0	0	0	0	0	0	1	0	0	0	0	0	0	0	0	0	0	0
e03d9579c559371f17e2c64cd9ced0554797ad68	#N/A	Metazoa	1	Rotifera	1	Eurotatoria	1	unclassified_Eurotatoria	0.29	unclassified_Eurotatoria	0.29	unclassified_Eurotatoria	0.29	unclassified_Eurotatoria_sp	0.28	0	0	0	0	0	0	0	0	0	0	0	1	0	0	0	0	6	0	0	1	2	0	0	0	0	0	0	0	0	0	0	0	1	0
57e209ae2a5eda1bed26cde414a6a0368a4e5e6e	#N/A	Metazoa	1	Rotifera	1	Eurotatoria	1	unclassified_Eurotatoria	0.29	unclassified_Eurotatoria	0.29	unclassified_Eurotatoria	0.29	unclassified_Eurotatoria_sp	0.27	0	0	0	0	0	0	0	0	0	0	0	0	0	0	0	0	0	0	0	0	0	0	0	0	0	0	0	0	0	0	0	0	0	0
5c9c3b0c486859f44bffadfeb9c4fcd3c9ee5992	#N/A	Metazoa	1	Rotifera	0.98	Eurotatoria	0.98	unclassified_Eurotatoria	0.29	unclassified_Eurotatoria	0.29	unclassified_Eurotatoria	0.29	unclassified_Eurotatoria_sp	0.27	0	0	0	0	0	0	0	0	0	0	0	0	0	0	0	0	0	0	0	0	1	0	0	0	0	0	0	0	0	0	0	0	0	0
ee815a989650e7a435ecb207718a53851f3961f9	#N/A	Metazoa	0.98	Rotifera	0.83	Eurotatoria	0.83	unclassified_Eurotatoria	0.7	unclassified_Eurotatoria	0.37	unclassified_Eurotatoria	0.28	unclassified_Eurotatoria_sp	0.28	0	0	0	0	0	0	0	0	0	0	0	0	0	0	0	0	0	0	0	0	0	0	0	0	0	0	0	0	0	0	0	0	0	0
ca9bda0b4628f34d668332eefe066f19ec9f4287	#N/A	Metazoa	1	Rotifera	1	Eurotatoria	1	unclassified_Eurotatoria	0.27	unclassified_Eurotatoria	0.27	unclassified_Eurotatoria	0.27	unclassified_Eurotatoria_sp	0.27	0	0	0	0	0	0	0	0	0	0	0	0	0	0	0	0	1	0	0	0	0	0	0	0	0	0	0	0	0	0	0	0	0	0
e9112f153e6a463f5710c40014a9e97b3dad01e4	#N/A	Metazoa	1	Rotifera	1	Eurotatoria	1	unclassified_Eurotatoria	0.27	unclassified_Eurotatoria	0.27	unclassified_Eurotatoria	0.27	unclassified_Eurotatoria_sp	0.27	0	0	0	0	0	0	0	0	0	0	0	0	0	0	0	0	0	0	1	0	0	0	0	0	0	0	0	0	0	0	0	0	0	0
e1ee3e92575d98f5cf6500d5327d3db01517d712	#N/A	Metazoa	1	Rotifera	1	Eurotatoria	1	unclassified_Eurotatoria	0.7	unclassified_Eurotatoria	0.51	unclassified_Eurotatoria	0.27	unclassified_Eurotatoria_sp	0.25	0	0	0	0	0	0	0	1	0	0	0	0	0	0	0	0	0	0	0	0	0	0	0	0	0	0	0	0	0	0	0	0	0	0
09df1ce822cdbee8214dfaebade459c4314cacc5	#N/A	Metazoa	0.96	Rotifera	0.91	Eurotatoria	0.91	unclassified_Eurotatoria	0.67	unclassified_Eurotatoria	0.47	unclassified_Eurotatoria	0.27	unclassified_Eurotatoria_sp	0.2	0	0	0	0	0	0	0	0	0	0	0	0	0	0	0	0	0	0	0	0	0	0	0	0	0	0	0	0	0	0	0	0	1	0
a0da8d562fb98822295abf9b184d670979a2ba62	#N/A	Metazoa	1	Rotifera	0.97	Eurotatoria	0.97	unclassified_Eurotatoria	0.57	unclassified_Eurotatoria	0.41	unclassified_Eurotatoria	0.27	unclassified_Eurotatoria_sp	0.19	0	0	0	0	0	0	0	0	0	0	0	0	0	0	0	0	0	0	0	0	0	0	0	0	0	0	0	0	0	0	0	0	0	0
85e18ec00b705559919e42db567fea42f62d81a0	#N/A	Metazoa	1	Rotifera	1	Eurotatoria	1	unclassified_Eurotatoria	0.26	unclassified_Eurotatoria	0.26	unclassified_Eurotatoria	0.26	unclassified_Eurotatoria_sp	0.26	0	0	0	0	0	0	0	0	0	0	0	0	0	0	0	0	0	0	0	0	0	0	0	0	0	0	0	0	0	0	0	1	0	0
58a667ea987393d0b0b29beb91e9d00d973aed7d	#N/A	Metazoa	1	Rotifera	1	Eurotatoria	1	unclassified_Eurotatoria	0.36	unclassified_Eurotatoria	0.34	unclassified_Eurotatoria	0.26	unclassified_Eurotatoria_sp	0.25	0	0	0	0	0	1	0	0	0	0	0	0	0	0	0	0	0	0	0	0	0	0	0	0	0	0	0	0	0	0	0	0	0	0
40ad6c7898b4199a013adbca6b1eab555124b57c	#N/A	Metazoa	1	Rotifera	0.99	Eurotatoria	0.99	unclassified_Eurotatoria	0.67	unclassified_Eurotatoria	0.42	unclassified_Eurotatoria	0.26	unclassified_Eurotatoria_sp	0.22	0	0	0	0	0	0	0	0	0	0	0	0	0	0	0	0	0	0	0	0	0	0	1	0	0	0	0	0	0	0	0	0	0	0
beaba5fe7f4de7f96deaf7bdf1a7052b45936cbd	#N/A	Metazoa	0.95	Rotifera	0.83	Eurotatoria	0.83	unclassified_Eurotatoria	0.72	unclassified_Eurotatoria	0.33	unclassified_Eurotatoria	0.26	unclassified_Eurotatoria_sp	0.22	0	0	0	0	0	0	0	0	0	0	0	0	0	0	0	0	0	0	0	0	0	0	0	0	0	0	0	0	0	0	0	0	0	0
fb7ffc36266f4a74a24a5277face1bfe306b352e	#N/A	Metazoa	0.99	Rotifera	0.98	Eurotatoria	0.98	unclassified_Eurotatoria	0.42	unclassified_Eurotatoria	0.4	unclassified_Eurotatoria	0.26	unclassified_Eurotatoria_sp	0.21	0	0	0	0	0	0	0	0	0	0	0	0	0	0	0	1	0	0	0	0	0	0	0	0	0	0	0	0	0	0	0	0	0	0
797f276af16b7a34ec748da8e1c1b54b21067ff8	#N/A	Metazoa	1	Rotifera	0.99	Eurotatoria	0.99	unclassified_Eurotatoria	0.66	unclassified_Eurotatoria	0.36	unclassified_Eurotatoria	0.25	unclassified_Eurotatoria_sp	0.25	0	0	1	0	0	0	0	0	0	0	0	0	0	0	0	0	0	0	0	0	0	0	0	0	0	0	0	0	0	0	0	0	0	0
9a20b8503d02eadc3ba7f38f7bff09079e6a1831	#N/A	Metazoa	0.9	Rotifera	0.84	Eurotatoria	0.84	unclassified_Eurotatoria	0.26	unclassified_Eurotatoria	0.26	unclassified_Eurotatoria	0.25	unclassified_Eurotatoria_sp	0.25	0	0	0	0	0	0	0	0	0	0	0	0	0	0	0	0	0	0	0	0	0	0	0	0	0	0	0	0	0	0	0	1	0	0
e2dadc922ca19a78761938cb3881018cf84504ae	#N/A	Metazoa	1	Rotifera	1	Eurotatoria	1	unclassified_Eurotatoria	0.25	unclassified_Eurotatoria	0.25	unclassified_Eurotatoria	0.25	unclassified_Eurotatoria_sp	0.25	0	0	0	0	0	0	0	0	0	0	0	0	0	0	0	0	0	0	0	0	0	0	0	0	0	0	0	0	0	0	0	0	0	0
7213dbcd602d11fbd0aad5f8dd2d5a14d07d5816	#N/A	Metazoa	1	Rotifera	1	Eurotatoria	1	unclassified_Eurotatoria	0.25	unclassified_Eurotatoria	0.25	unclassified_Eurotatoria	0.25	unclassified_Eurotatoria_sp	0.23	0	0	0	0	0	0	0	0	0	0	0	0	0	0	0	0	0	0	0	0	0	0	0	0	0	0	0	0	0	0	0	1	0	0
9a19c2450c3a976c49b2a8a92250398b011a93e7	#N/A	Metazoa	1	Rotifera	0.98	Eurotatoria	0.98	unclassified_Eurotatoria	0.25	unclassified_Eurotatoria	0.25	unclassified_Eurotatoria	0.25	unclassified_Eurotatoria_sp	0.22	0	0	0	0	0	0	0	0	0	0	0	0	0	0	0	0	0	0	0	0	0	0	0	0	0	0	0	0	0	0	0	0	0	0
49337b79ba0124bdfa4002d77b9b394aa11d141d	#N/A	Metazoa	1	Rotifera	1	Eurotatoria	1	unclassified_Eurotatoria	0.4	unclassified_Eurotatoria	0.25	unclassified_Eurotatoria	0.25	unclassified_Eurotatoria_sp	0.15	0	0	0	0	0	0	0	0	0	0	0	0	0	0	0	0	0	0	0	0	0	0	0	0	0	0	0	0	0	0	0	0	0	0
5a8733a5c765ddc19535a882a584e5930b208c50	#N/A	Metazoa	1	Rotifera	0.9	Eurotatoria	0.9	unclassified_Eurotatoria	0.72	unclassified_Eurotatoria	0.32	unclassified_Eurotatoria	0.24	unclassified_Eurotatoria_sp	0.24	0	0	0	0	0	0	0	0	0	0	0	0	0	0	0	0	0	0	0	0	0	1	0	0	0	0	0	0	0	0	0	0	0	0
c028f1469eefc859aec3abf9b6d092226ddd94f9	#N/A	Metazoa	1	Rotifera	1	Eurotatoria	1	unclassified_Eurotatoria	0.24	unclassified_Eurotatoria	0.24	unclassified_Eurotatoria	0.24	unclassified_Eurotatoria_sp	0.23	0	0	0	0	0	0	0	0	0	0	0	0	0	0	0	0	0	0	0	0	1	0	0	0	0	0	0	0	0	0	0	0	0	0
0e0a74fd09997d09cbba586e81059ece6f0ca187	#N/A	Metazoa	1	Rotifera	0.92	Eurotatoria	0.92	unclassified_Eurotatoria	0.52	unclassified_Eurotatoria	0.33	unclassified_Eurotatoria	0.24	unclassified_Eurotatoria_sp	0.21	0	0	0	0	0	0	0	0	0	0	0	0	0	0	0	0	0	0	0	0	0	0	0	0	0	0	0	0	0	0	0	0	0	0
87867d32e8d7cd67b70b1f652f8fabb0ffc3faeb	#N/A	Metazoa	1	Rotifera	0.99	Eurotatoria	0.99	unclassified_Eurotatoria	0.73	unclassified_Eurotatoria	0.67	unclassified_Eurotatoria	0.23	unclassified_Eurotatoria_sp	0.23	0	0	0	0	0	0	0	0	0	0	0	0	0	0	0	0	0	0	0	0	0	1	0	0	0	0	0	0	0	0	0	0	0	0
8f2d371939b8f78e5d2bb557eb6c5456a7ddff82	#N/A	Metazoa	1	Rotifera	0.89	Eurotatoria	0.89	unclassified_Eurotatoria	0.79	unclassified_Eurotatoria	0.38	unclassified_Eurotatoria	0.23	unclassified_Eurotatoria_sp	0.22	0	0	0	0	0	0	0	0	0	0	0	0	0	0	0	1	0	0	0	0	0	0	0	0	0	0	0	0	0	0	0	0	0	0
213bfb0a3709a330acce47072f20401b1a31b2e5	#N/A	Metazoa	0.98	Rotifera	0.98	Eurotatoria	0.98	unclassified_Eurotatoria	0.58	unclassified_Eurotatoria	0.27	unclassified_Eurotatoria	0.23	unclassified_Eurotatoria_sp	0.09	0	0	0	0	0	0	0	0	0	0	0	0	0	0	1	0	0	0	0	0	0	0	0	0	0	0	0	0	0	0	0	0	0	0
3cb621faba36efc1e2b891fe9e8f20bba8fba151	#N/A	Metazoa	0.99	Rotifera	0.86	Eurotatoria	0.86	unclassified_Eurotatoria	0.45	unclassified_Eurotatoria	0.34	unclassified_Eurotatoria	0.22	unclassified_Eurotatoria_sp	0.22	0	0	0	0	0	0	0	0	0	0	0	0	0	0	0	0	0	0	0	0	0	0	0	0	0	0	0	0	0	0	0	0	0	0
effb32912e517c976caab97d3ab1736d9a221172	#N/A	Metazoa	1	Rotifera	0.81	Eurotatoria	0.81	unclassified_Eurotatoria	0.6	unclassified_Eurotatoria	0.44	unclassified_Eurotatoria	0.22	unclassified_Eurotatoria_sp	0.19	0	0	0	0	0	0	0	0	0	0	0	0	0	0	1	0	0	0	0	0	0	0	0	0	0	0	0	0	0	0	0	0	0	0
dc0cfab2a3156be6f615ef1c99b6d766a92b93cd	#N/A	Metazoa	1	Rotifera	0.98	Eurotatoria	0.98	unclassified_Eurotatoria	0.67	unclassified_Eurotatoria	0.51	unclassified_Eurotatoria	0.22	unclassified_Eurotatoria_sp	0.19	0	0	0	2	0	0	0	0	0	0	0	0	0	0	0	0	0	0	0	0	0	0	0	0	0	0	0	0	0	0	0	0	0	0
e3f51826955fa8852a81fdbad414604de99920a4	#N/A	Metazoa	1	Rotifera	0.99	Eurotatoria	0.99	unclassified_Eurotatoria	0.65	unclassified_Eurotatoria	0.36	unclassified_Eurotatoria	0.2	unclassified_Eurotatoria_sp	0.2	0	0	0	0	0	0	0	0	0	0	0	0	0	0	0	0	0	0	0	0	0	0	0	0	0	0	0	0	0	0	0	0	0	0
6f9038e7b5f80027bca508eeafd1fbc7871417d2	#N/A	Metazoa	1	Rotifera	1	Eurotatoria	1	unclassified_Eurotatoria	0.66	unclassified_Eurotatoria	0.55	unclassified_Eurotatoria	0.2	unclassified_Eurotatoria_sp	0.19	0	0	0	0	0	0	0	0	0	0	0	0	0	0	0	0	0	0	0	0	0	0	0	0	0	0	0	0	0	0	0	0	0	0
145b805dfdc0f766dd2e7cc972a9b3e317d55304	#N/A	Metazoa	0.85	Rotifera	0.8	Eurotatoria	0.8	unclassified_Eurotatoria	0.65	unclassified_Eurotatoria	0.41	unclassified_Eurotatoria	0.2	unclassified_Eurotatoria_sp	0.15	0	0	0	0	0	0	0	0	0	0	0	0	0	0	0	0	0	0	0	0	0	0	0	0	0	0	0	0	0	0	0	0	0	0
da3d61ab7c56ccf6499fed12d3ec7d254469cba6	#N/A	Metazoa	0.96	Rotifera	0.87	Eurotatoria	0.87	unclassified_Eurotatoria	0.56	unclassified_Eurotatoria	0.26	unclassified_Eurotatoria	0.2	unclassified_Eurotatoria_sp	0.12	0	0	0	0	0	0	0	1	0	0	0	0	0	0	0	0	0	0	0	0	0	0	0	0	0	0	0	0	0	0	0	0	0	0
e1d5235fe8c577f8f1ba94008537c7a416cf4c73	#N/A	Metazoa	0.98	Rotifera	0.85	Eurotatoria	0.85	unclassified_Eurotatoria	0.2	unclassified_Eurotatoria	0.2	unclassified_Eurotatoria	0.2	unclassified_Eurotatoria_sp	0.12	0	0	0	0	0	0	0	0	0	0	0	0	0	0	0	0	0	0	0	0	0	0	0	0	0	1	0	0	0	0	0	0	0	0
ab5ef8d3a2789e0c03ec1f285adc0907bbcdd47a	#N/A	Metazoa	0.96	Rotifera	0.9	Eurotatoria	0.9	unclassified_Eurotatoria	0.74	unclassified_Eurotatoria	0.43	unclassified_Eurotatoria	0.2	unclassified_Eurotatoria_sp	0.11	0	0	0	0	0	0	0	0	0	0	0	0	0	0	0	1	0	0	0	0	0	0	0	0	0	0	0	0	0	0	0	0	0	0
83a752632d667ae3f9a873d723269aa3759f21bc	#N/A	Metazoa	0.99	Rotifera	0.84	Eurotatoria	0.84	unclassified_Eurotatoria	0.7	unclassified_Eurotatoria	0.38	unclassified_Eurotatoria	0.19	unclassified_Eurotatoria_sp	0.19	0	0	0	0	0	0	0	0	0	0	1	0	0	0	0	0	0	0	0	0	0	0	0	0	0	0	0	0	0	0	0	0	0	0
8784ccae3dcfe473e83eadb1302adb67d9288849	#N/A	Metazoa	1	Rotifera	0.99	Eurotatoria	0.99	unclassified_Eurotatoria	0.27	unclassified_Eurotatoria	0.27	unclassified_Eurotatoria	0.19	unclassified_Eurotatoria_sp	0.19	0	0	0	0	0	0	0	0	0	0	0	0	0	0	0	0	0	0	1	0	0	0	0	0	0	0	0	0	0	0	0	0	0	0
ab334f7266dd50ae7c579723bfa495661149fa42	#N/A	Metazoa	1	Rotifera	0.99	Eurotatoria	0.99	unclassified_Eurotatoria	0.48	unclassified_Eurotatoria	0.19	unclassified_Eurotatoria	0.18	unclassified_Eurotatoria_sp	0.16	0	0	0	0	0	0	0	0	0	0	0	0	0	0	0	0	0	0	0	0	0	0	0	0	0	0	0	0	0	0	0	0	0	0
cc529a39ac5fa4013f7150676d4dad981c960192	#N/A	Metazoa	0.99	Rotifera	0.82	Eurotatoria	0.82	unclassified_Eurotatoria	0.51	unclassified_Eurotatoria	0.38	unclassified_Eurotatoria	0.16	unclassified_Eurotatoria_sp	0.16	0	0	0	0	0	0	0	0	0	0	0	0	0	0	0	0	0	0	0	0	0	0	0	0	0	0	0	0	0	0	0	0	0	0
19da7204a961fb7d73028944006eb9b7ee080fa5	#N/A	Metazoa	0.99	Rotifera	0.84	Eurotatoria	0.84	unclassified_Eurotatoria	0.53	unclassified_Eurotatoria	0.18	unclassified_Eurotatoria	0.15	unclassified_Eurotatoria_sp	0.14	0	0	0	0	0	0	0	0	0	0	0	0	0	0	0	0	1	0	0	0	0	0	0	0	0	0	0	0	0	0	0	0	0	0
f43bcec7b58fcd715e33207c1401b3bd584ab31f	#N/A	Metazoa	0.95	Rotifera	0.88	Eurotatoria	0.88	unclassified_Eurotatoria	0.78	unclassified_Eurotatoria	0.48	unclassified_Eurotatoria	0.14	unclassified_Eurotatoria_sp	0.14	1	0	0	0	0	0	0	0	0	0	0	0	0	0	0	0	0	0	0	0	0	0	0	0	0	0	0	0	0	0	0	0	0	0
43a472649ca9c0bcd26641bc9d782fce6974fd58	#N/A	Metazoa	1	Rotifera	0.82	Eurotatoria	0.82	unclassified_Eurotatoria	0.61	unclassified_Eurotatoria	0.45	unclassified_Eurotatoria	0.12	unclassified_Eurotatoria_sp	0.12	0	0	0	0	0	0	0	0	0	0	1	0	0	0	0	0	0	0	0	0	0	0	0	0	0	0	0	0	0	0	0	0	0	0
7ad677339859f6d09208f03d136567fbd56c30b6	#N/A	Metazoa	1	Rotifera	1	Eurotatoria	1	unclassified_Eurotatoria	0.79	unclassified_Eurotatoria	0.28	unclassified_Eurotatoria	0.12	unclassified_Eurotatoria_sp	0.12	0	0	0	0	0	0	0	1	0	0	0	0	0	0	0	0	0	0	0	0	0	0	0	0	0	0	0	0	0	0	0	0	0	0
1a65ad49a8d2a08222b5e9469ac8cf917462ba0d	#N/A	Metazoa	1	Rotifera	1	Eurotatoria	1	unclassified_Eurotatoria	0.61	unclassified_Eurotatoria	0.19	unclassified_Eurotatoria	0.11	unclassified_Eurotatoria_sp	0.11	0	0	0	0	0	1	0	0	0	0	0	0	0	0	0	0	0	0	0	0	0	0	0	0	0	0	0	0	0	0	0	0	0	0
a7e72f4019beebdd61ad1321efd9c4467fec534f	#N/A	Metazoa	1	Arthropoda	1	Insecta	0.97	Hymenoptera	0.94	Formicidae	0.91	unclassified_Formicidae	0.72	unclassified_Formicidae_sp	0.21	0	0	0	0	0	0	0	1	0	0	0	0	0	0	0	0	0	0	0	0	0	0	0	0	0	0	0	0	0	0	0	0	0	0
a4b44899660ce015f8394be8443e66f33bbec350	#N/A	Metazoa	1	Arthropoda	1	Insecta	1	Lepidoptera	0.99	Geometridae	0.98	unclassified_Geometridae	0.71	unclassified_Geometridae_sp	0.71	0	0	0	0	0	0	0	0	0	0	0	0	0	0	0	0	0	0	0	0	0	0	0	0	0	0	0	0	0	0	0	0	0	0
372ae617e7720d48c46f77ff02ce91609d45f03c	#N/A	Metazoa	1	Arthropoda	1	Insecta	1	Hymenoptera	0.93	unclassified_Hymenoptera	0.77	unclassified_Hymenoptera	0.75	unclassified_Hymenoptera_sp	0.75	0	0	0	0	0	0	0	0	0	0	0	0	0	0	0	0	0	0	0	0	0	0	0	0	0	0	0	0	0	0	0	0	0	0
c5281f537c8923a7c762273423cfea9494d08e12	#N/A	Metazoa	1	Arthropoda	1	Insecta	1	Hymenoptera	0.99	unclassified_Hymenoptera	0.64	unclassified_Hymenoptera	0.62	unclassified_Hymenoptera_sp	0.62	0	0	0	0	0	0	1	0	0	0	0	0	0	0	0	0	0	0	0	0	0	0	2	0	0	0	0	0	0	0	0	0	0	0
a6ddf8d55aa815efbd49450d4653f3b733bc68c3	#N/A	Metazoa	0.99	Arthropoda	0.98	Insecta	0.93	Hymenoptera	0.82	unclassified_Hymenoptera	0.28	unclassified_Hymenoptera	0.24	unclassified_Hymenoptera_sp	0.24	0	0	0	0	0	0	0	0	0	0	0	0	0	0	0	0	0	0	0	0	0	1	0	0	0	0	0	0	0	0	0	0	0	0
d36c16e492292d34fa06c83c670a7770c6567ca8	#N/A	Metazoa	1	Arthropoda	1	Insecta	1	unclassified_Insecta	0.58	unclassified_Insecta	0.58	unclassified_Insecta	0.58	unclassified_Insecta_sp	0.58	0	0	0	0	0	1	0	0	0	0	0	0	0	0	0	0	0	0	0	0	0	0	0	0	0	0	0	0	0	0	0	0	0	0
db4a58ea1e6f104bb8eb1663b83a15a772713def	#N/A	Metazoa	1	Arthropoda	0.99	Insecta	0.93	unclassified_Insecta	0.65	unclassified_Insecta	0.53	unclassified_Insecta	0.53	unclassified_Insecta_sp	0.53	0	0	0	0	0	1	0	0	0	0	0	0	0	0	0	0	0	0	0	0	0	0	0	0	0	0	0	0	0	0	0	0	0	0
96e490b99cbb2a182a8fd6fabafdfbaa0bcc3606	#N/A	Metazoa	0.9	Arthropoda	0.84	Insecta	0.82	unclassified_Insecta	0.53	unclassified_Insecta	0.51	unclassified_Insecta	0.51	unclassified_Insecta_sp	0.51	0	0	0	0	0	0	0	0	0	0	0	0	0	0	0	0	0	2	0	0	0	0	0	0	0	0	0	0	0	0	0	0	0	0
19a4bd38d6b08feac5308fff4377cd2eca23e870	#N/A	Metazoa	0.95	Arthropoda	0.93	Insecta	0.91	unclassified_Insecta	0.49	unclassified_Insecta	0.49	unclassified_Insecta	0.49	unclassified_Insecta_sp	0.49	0	0	0	0	0	0	0	0	1	0	0	0	0	0	0	0	0	0	3	2	0	0	0	0	0	0	0	0	0	0	0	0	0	0
10ac4261f6adac8d228ee1cf3643cd62942e8dd1	#N/A	Metazoa	1	Arthropoda	0.99	Insecta	0.96	unclassified_Insecta	0.63	unclassified_Insecta	0.53	unclassified_Insecta	0.48	unclassified_Insecta_sp	0.1	0	0	0	0	0	0	0	0	0	0	0	0	0	0	0	0	0	0	0	0	0	0	0	0	0	0	0	0	0	0	0	0	0	0
6e9b41a02600ad17f378b7289f2530bd92cb3748	#N/A	Metazoa	1	Arthropoda	1	Insecta	0.99	unclassified_Insecta	0.68	unclassified_Insecta	0.49	unclassified_Insecta	0.45	unclassified_Insecta_sp	0.24	0	0	0	0	0	0	0	1	0	0	0	0	0	0	0	0	0	0	0	0	0	0	0	0	0	0	0	0	0	0	0	0	0	0
11cab75bfffbb39e7ad238b30b4b39aa2e6f923c	#N/A	Metazoa	1	Arthropoda	0.99	Insecta	0.99	unclassified_Insecta	0.49	unclassified_Insecta	0.32	unclassified_Insecta	0.32	unclassified_Insecta_sp	0.29	0	0	0	0	0	0	0	0	0	0	0	0	0	0	0	0	0	0	0	0	0	0	0	0	0	0	0	0	0	0	0	0	0	0
8606a73b27d520354d9f7de9040f145824fda71a	#N/A	Metazoa	1	Arthropoda	1	Insecta	1	unclassified_Insecta	0.77	unclassified_Insecta	0.75	unclassified_Insecta	0.24	unclassified_Insecta_sp	0.24	0	0	0	0	0	0	0	0	0	0	0	0	0	0	0	0	0	0	0	0	0	0	0	0	0	0	0	0	0	0	0	0	0	0
5047b2c236b19677c21e151293abd2b734e6a7a2	#N/A	Metazoa	1	Arthropoda	0.98	Insecta	0.97	unclassified_Insecta	0.38	unclassified_Insecta	0.27	unclassified_Insecta	0.2	unclassified_Insecta_sp	0.19	0	0	0	0	0	0	0	0	0	0	0	0	0	0	0	0	0	0	0	0	0	0	0	0	0	0	0	0	0	0	0	0	0	0
490a8320a784bb54e92547aac4ed1172a7bda84c	#N/A	Metazoa	0.96	Arthropoda	0.86	Insecta	0.85	unclassified_Insecta	0.33	unclassified_Insecta	0.2	unclassified_Insecta	0.19	unclassified_Insecta_sp	0.12	0	0	0	0	0	0	0	0	0	0	0	0	0	0	0	0	0	0	0	0	0	0	0	0	0	0	0	0	0	0	0	0	0	0
6118addc7fe837fbe1d2a15437dd99c5fdfebdfd	#N/A	Metazoa	1	Arthropoda	1	Insecta	1	unclassified_Insecta	0.75	unclassified_Insecta	0.72	unclassified_Insecta	0.18	unclassified_Insecta_sp	0.18	0	0	0	0	0	0	0	0	0	0	0	0	0	0	0	0	0	0	0	0	0	0	0	0	0	0	0	0	0	0	0	0	0	0
75dc4a0932469747f4a7fb4111a204899bdffcff	#N/A	Metazoa	0.97	Arthropoda	0.95	Insecta	0.82	unclassified_Insecta	0.72	unclassified_Insecta	0.68	unclassified_Insecta	0.17	unclassified_Insecta_sp	0.15	0	0	0	0	0	0	0	0	1	0	0	0	0	0	0	0	0	0	0	0	0	0	0	0	0	0	0	0	0	0	0	0	0	0
626e039a323ff5fcaa1e9f483a82cdf8a5d3f86c	#N/A	Metazoa	0.99	Arthropoda	0.94	Insecta	0.83	unclassified_Insecta	0.45	unclassified_Insecta	0.2	unclassified_Insecta	0.15	unclassified_Insecta_sp	0.12	0	0	0	0	0	0	0	0	0	0	0	0	0	0	0	0	0	0	0	0	0	0	0	0	0	0	0	0	0	1	3	11	0	0
0308365faae8ca1a9fb28fa961d567d5665ba83b	#N/A	Metazoa	1	Arthropoda	1	Insecta	0.93	unclassified_Insecta	0.56	unclassified_Insecta	0.22	unclassified_Insecta	0.11	unclassified_Insecta_sp	0.1	0	0	0	0	0	0	0	0	0	0	0	0	0	0	0	0	0	0	0	0	0	0	0	0	0	0	1	0	0	0	0	0	0	0
958c2588186e2fc56765f999f22351df610c50a0	#N/A	Metazoa	1	Arthropoda	0.97	Insecta	0.85	unclassified_Insecta	0.14	unclassified_Insecta	0.11	unclassified_Insecta	0.11	unclassified_Insecta_sp	0.1	3	1	4	0	0	1	0	0	2	7	0	0	0	0	0	1	0	0	0	0	0	0	0	0	0	0	0	0	0	1	40	1	2	0
116ce4931e81f1341b360b7c6de6d525fe38d88a	#N/A	Metazoa	1	Arthropoda	0.97	Insecta	0.82	unclassified_Insecta	0.28	unclassified_Insecta	0.13	unclassified_Insecta	0.11	unclassified_Insecta_sp	0.09	0	0	0	0	0	0	0	0	0	0	0	0	0	0	0	0	0	0	0	0	0	0	0	0	0	0	0	0	0	0	0	0	0	0
4224760f00c76cbc6b2cec40229d637c41d76160	#N/A	Metazoa	1	Arthropoda	1	Insecta	0.96	unclassified_Insecta	0.77	unclassified_Insecta	0.18	unclassified_Insecta	0.1	unclassified_Insecta_sp	0.1	0	0	0	0	0	0	1	0	0	0	0	0	0	0	0	0	0	0	0	0	0	0	0	0	0	0	0	0	0	0	0	0	0	0
fe7ae8382759a1bab51ea45ea2ee0acce6605dac	#N/A	Metazoa	1	Arthropoda	1	Insecta	0.99	unclassified_Insecta	0.44	unclassified_Insecta	0.38	unclassified_Insecta	0.1	unclassified_Insecta_sp	0.09	0	0	0	0	0	0	0	0	0	0	0	0	0	0	0	0	0	0	0	0	0	0	0	0	0	0	0	0	0	6	0	0	0	0
412ec7c6984b324b68643fe203339cb5bec9dae1	#N/A	Metazoa	0.98	Arthropoda	0.95	Insecta	0.85	unclassified_Insecta	0.65	unclassified_Insecta	0.16	unclassified_Insecta	0.1	unclassified_Insecta_sp	0.05	0	0	0	0	0	0	0	0	1	0	0	0	0	0	0	0	0	0	0	0	0	0	0	0	0	0	0	0	0	0	0	0	0	0
141b27b67e038574b9b357695d88078467ae9faa	#N/A	Metazoa	0.96	Arthropoda	0.91	Insecta	0.81	unclassified_Insecta	0.09	unclassified_Insecta	0.08	unclassified_Insecta	0.08	unclassified_Insecta_sp	0.08	0	0	0	0	0	0	0	0	0	0	0	0	0	0	0	0	0	0	0	0	0	0	0	0	0	0	0	0	0	1	0	0	0	0
28f2290f7cc5b0db92e0782a9873f0d07c5961fa	#N/A	Metazoa	0.97	Arthropoda	0.94	Insecta	0.85	unclassified_Insecta	0.33	unclassified_Insecta	0.12	unclassified_Insecta	0.08	unclassified_Insecta_sp	0.08	0	0	0	0	0	0	1	0	0	0	0	0	0	0	0	0	0	0	0	0	0	0	0	0	0	0	0	0	0	0	0	0	0	0
5b50525fefff09cc029498a15433a0ec6c7f4364	#N/A	Metazoa	1	Arthropoda	1	Insecta	1	unclassified_Insecta	0.13	unclassified_Insecta	0.09	unclassified_Insecta	0.08	unclassified_Insecta_sp	0.08	0	0	0	0	0	0	0	0	0	0	0	0	0	0	0	0	0	0	0	0	0	0	0	0	0	0	0	0	0	0	0	0	0	0
4e8220bc88d70bad96143f30953a26824132906a	#N/A	Metazoa	1	Arthropoda	1	Insecta	1	unclassified_Insecta	0.77	unclassified_Insecta	0.1	unclassified_Insecta	0.08	unclassified_Insecta_sp	0.07	0	0	0	0	0	0	0	0	0	0	0	0	0	0	0	0	0	0	0	0	0	0	0	0	0	0	0	0	0	0	0	0	0	0
d2a9ea92f141a271ffe0c3c649ed734a68b7e989	#N/A	Metazoa	1	Arthropoda	0.99	Insecta	0.82	unclassified_Insecta	0.4	unclassified_Insecta	0.08	unclassified_Insecta	0.07	unclassified_Insecta_sp	0.07	0	0	3	1	0	5	0	1	0	0	0	0	0	0	0	0	0	0	0	0	0	1	0	0	0	0	0	0	0	1	8	0	0	3
497036941dab52140de4ded20dcde245aa94b005	#N/A	Metazoa	0.93	Arthropoda	0.88	Insecta	0.83	unclassified_Insecta	0.49	unclassified_Insecta	0.17	unclassified_Insecta	0.06	unclassified_Insecta_sp	0.06	0	0	0	0	0	0	0	0	0	0	0	0	0	0	0	0	0	0	0	0	0	0	0	0	0	0	0	0	0	0	0	0	0	0
c61713018a36f9a2c130848dcfd294f1c4db3a08	#N/A	Metazoa	1	Arthropoda	0.95	Insecta	0.8	unclassified_Insecta	0.29	unclassified_Insecta	0.08	unclassified_Insecta	0.06	unclassified_Insecta_sp	0.04	0	0	0	0	0	0	0	0	0	0	0	0	0	0	0	0	0	0	0	0	1	0	0	0	0	0	0	0	0	0	0	0	0	0
247fcb9a4efccd33ab190e4d5b1fa43387a54c88	#N/A	Metazoa	1	Arthropoda	0.95	Insecta	0.87	unclassified_Insecta	0.58	unclassified_Insecta	0.05	unclassified_Insecta	0.05	unclassified_Insecta_sp	0.05	0	0	0	0	0	0	0	0	0	0	0	0	0	0	0	0	0	0	0	0	0	0	0	0	0	0	0	0	0	0	0	0	0	0
702b4ea2ee4004938aa5876346f7d1b8c610352f	#N/A	Metazoa	1	Arthropoda	0.97	Insecta	0.88	unclassified_Insecta	0.32	unclassified_Insecta	0.27	unclassified_Insecta	0.05	unclassified_Insecta_sp	0.05	0	0	0	0	0	0	0	0	0	0	0	0	0	0	0	0	0	0	0	0	0	0	0	0	0	0	0	0	0	0	0	0	0	0
afeb2e754f88eba80056945682878879ae672021	#N/A	Metazoa	1	Arthropoda	0.98	Insecta	0.84	unclassified_Insecta	0.11	unclassified_Insecta	0.05	unclassified_Insecta	0.05	unclassified_Insecta_sp	0.05	0	0	0	0	0	0	0	0	0	0	0	0	0	0	0	0	0	0	0	0	0	0	0	0	0	0	0	0	0	0	0	0	0	0
a6d53e922864062dff9388cfe22f4fff6d40baba	#N/A	Metazoa	0.99	Arthropoda	0.97	Insecta	0.97	unclassified_Insecta	0.47	unclassified_Insecta	0.14	unclassified_Insecta	0.04	unclassified_Insecta_sp	0.04	0	0	0	0	0	0	0	0	0	0	0	0	0	0	0	0	0	0	0	0	0	0	0	0	0	0	0	0	0	0	0	0	0	0
280a8cd951825e0d4efcc608be3f48b14eb7ec9b	#N/A	Metazoa	1	Arthropoda	0.97	Insecta	0.93	unclassified_Insecta	0.26	unclassified_Insecta	0.12	unclassified_Insecta	0.04	unclassified_Insecta_sp	0.04	0	0	0	0	0	0	0	0	0	0	0	0	0	0	0	0	0	0	0	0	0	0	0	0	0	0	0	0	0	0	0	0	0	0
5afe8efde2ed99eaad1c47ea83c3377524710772	#N/A	Metazoa	1	Arthropoda	1	Insecta	0.99	unclassified_Insecta	0.31	unclassified_Insecta	0.17	unclassified_Insecta	0.04	unclassified_Insecta_sp	0.04	1	0	0	0	0	0	0	0	0	0	0	0	0	0	0	0	0	1	0	0	14	0	0	0	0	0	0	0	0	0	0	0	0	0
9dafaab0fbd37c638f1336a2df98f45647ec7330	#N/A	Metazoa	1	Arthropoda	0.96	Insecta	0.87	unclassified_Insecta	0.37	unclassified_Insecta	0.1	unclassified_Insecta	0.03	unclassified_Insecta_sp	0.03	0	0	0	0	0	0	0	0	0	0	0	0	0	0	0	0	0	0	0	0	0	0	0	0	0	0	0	0	0	1	0	0	0	0
c22f80b956bd41e8878008134db76fb95557990f	#N/A	Metazoa	1	Arthropoda	1	Insecta	0.98	unclassified_Insecta	0.26	unclassified_Insecta	0.09	unclassified_Insecta	0.03	unclassified_Insecta_sp	0.03	0	0	0	0	0	17	0	2	0	0	0	0	0	0	0	0	0	0	0	0	0	0	0	0	0	0	0	0	0	0	0	0	0	0
0431d81f4b082d1b6ce05bac23835b90adf22b03	#N/A	Metazoa	1	Arthropoda	0.84	Insecta	0.81	unclassified_Insecta	0.27	unclassified_Insecta	0.1	unclassified_Insecta	0.02	unclassified_Insecta_sp	0.02	0	0	0	0	0	0	0	1	0	0	0	0	0	0	0	0	0	0	0	0	0	0	0	0	0	0	0	0	0	0	0	0	0	0
47b908624243a3b07b7d1a61461689d05f143971	#N/A	Metazoa	0.87	Arthropoda	0.85	Insecta	0.8	unclassified_Insecta	0.29	unclassified_Insecta	0.03	unclassified_Insecta	0.02	unclassified_Insecta_sp	0.02	0	0	0	0	0	0	0	0	0	0	0	0	0	0	0	0	0	0	0	0	0	0	0	0	0	0	0	0	0	0	0	0	0	0
f82384f95a977444e6afb9b8d14888713470be62	#N/A	Metazoa	0.98	Arthropoda	0.92	Insecta	0.89	unclassified_Insecta	0.26	unclassified_Insecta	0.05	unclassified_Insecta	0.02	unclassified_Insecta_sp	0.02	0	0	0	0	0	0	0	0	0	0	0	0	0	0	0	0	0	0	0	0	1	0	0	0	0	0	0	0	0	0	0	0	0	0
72d31d67a8e58e3fad4b2f15295b98aac46691b3	#N/A	Metazoa	0.99	Arthropoda	0.92	Insecta	0.85	unclassified_Insecta	0.4	unclassified_Insecta	0.05	unclassified_Insecta	0.01	unclassified_Insecta_sp	0.01	0	0	0	1	0	0	0	0	0	0	0	0	0	0	0	0	0	0	0	0	0	0	0	0	0	0	0	0	0	0	0	0	0	0
3386b00302d03a6473699efb118d627bd8ad682a	#N/A	Metazoa	1	Arthropoda	0.96	Insecta	0.8	unclassified_Insecta	0.22	unclassified_Insecta	0	unclassified_Insecta	0	unclassified_Insecta_sp	0	0	0	1	0	0	0	0	0	0	0	0	0	0	0	0	0	0	0	0	0	0	0	0	0	0	0	0	0	0	0	0	0	0	0
2ccb70e664ecfa97bfbf8816c0ac96bbeb6758a7	#N/A	Metazoa	0.87	unclassified_Metazoa	0.77	unclassified_Metazoa	0.77	unclassified_Metazoa	0.76	unclassified_Metazoa	0.76	unclassified_Metazoa	0.76	unclassified_Metazoa_sp	0.76	0	0	0	0	0	0	0	0	0	0	0	0	0	0	0	0	0	0	0	5	0	0	0	0	0	0	0	0	0	0	0	0	0	0
1eff683c024fe5832ed0a48a66cd8dd8b7a67621	#N/A	Metazoa	0.96	unclassified_Metazoa	0.72	unclassified_Metazoa	0.72	unclassified_Metazoa	0.72	unclassified_Metazoa	0.72	unclassified_Metazoa	0.72	unclassified_Metazoa_sp	0.72	0	0	0	0	0	0	0	0	0	0	0	0	0	0	0	0	0	0	0	0	0	0	0	0	0	0	0	0	0	0	0	0	0	0
02557ba6c084fc5a340658a004329cfe807ab483	#N/A	Metazoa	0.82	unclassified_Metazoa	0.72	unclassified_Metazoa	0.72	unclassified_Metazoa	0.72	unclassified_Metazoa	0.72	unclassified_Metazoa	0.72	unclassified_Metazoa_sp	0.72	0	0	0	0	0	0	0	0	0	0	0	0	0	0	0	0	0	0	0	0	0	0	1	0	0	0	0	0	0	0	0	0	0	0
3bd78031d2f34afc08be0afb12bc4cec0634de65	#N/A	Metazoa	0.87	unclassified_Metazoa	0.7	unclassified_Metazoa	0.7	unclassified_Metazoa	0.7	unclassified_Metazoa	0.7	unclassified_Metazoa	0.7	unclassified_Metazoa_sp	0.7	0	0	1	0	0	0	0	0	0	0	0	0	0	0	0	0	0	0	0	0	0	0	0	0	0	0	0	0	0	0	0	0	0	0
15b0e4de06e71706c009ea2380ef145992a32c15	#N/A	Metazoa	0.97	unclassified_Metazoa	0.78	unclassified_Metazoa	0.78	unclassified_Metazoa	0.75	unclassified_Metazoa	0.74	unclassified_Metazoa	0.7	unclassified_Metazoa_sp	0.66	0	0	0	0	0	0	0	0	0	0	0	0	0	0	1	0	0	0	0	0	0	0	0	0	0	0	0	0	0	0	0	0	0	0
64153e4d8be480b3549833e6f1e6c244ca07af3e	#N/A	Metazoa	0.85	unclassified_Metazoa	0.75	unclassified_Metazoa	0.72	unclassified_Metazoa	0.69	unclassified_Metazoa	0.69	unclassified_Metazoa	0.69	unclassified_Metazoa_sp	0.69	0	0	0	0	0	0	0	0	0	0	0	0	0	0	0	0	0	0	0	0	0	0	0	0	0	0	0	0	0	0	0	0	0	0
8be376de74aa594250774ae773c46f1cbb6ad5cb	#N/A	Metazoa	0.9	unclassified_Metazoa	0.75	unclassified_Metazoa	0.73	unclassified_Metazoa	0.69	unclassified_Metazoa	0.69	unclassified_Metazoa	0.69	unclassified_Metazoa_sp	0.69	45	31	30	52	82	819	19	62	42	0	15	115	104	172	139	93	10	0	18	0	0	0	15	0	0	0	0	0	0	15	55	110	37	151
7827e057a967af7a1e889f6dd9dd9b24a3cc3201	#N/A	Metazoa	0.99	unclassified_Metazoa	0.78	unclassified_Metazoa	0.68	unclassified_Metazoa	0.68	unclassified_Metazoa	0.68	unclassified_Metazoa	0.68	unclassified_Metazoa_sp	0.68	0	0	0	0	0	0	0	0	0	0	0	0	0	0	0	0	1	0	0	0	0	0	0	0	0	0	0	0	0	0	0	0	0	0
b6f400ef3b06f0ec09e0117f5f68e56c66bb5e69	#N/A	Metazoa	0.95	unclassified_Metazoa	0.69	unclassified_Metazoa	0.69	unclassified_Metazoa	0.68	unclassified_Metazoa	0.68	unclassified_Metazoa	0.68	unclassified_Metazoa_sp	0.68	0	0	0	0	0	0	0	0	0	0	0	0	0	0	0	0	0	0	0	0	0	0	0	0	0	0	0	0	0	0	0	0	0	0
c4395e0a6038920e03bf562d01ae29dd37d21ea5	#N/A	Metazoa	0.88	unclassified_Metazoa	0.67	unclassified_Metazoa	0.67	unclassified_Metazoa	0.67	unclassified_Metazoa	0.67	unclassified_Metazoa	0.67	unclassified_Metazoa_sp	0.67	0	0	0	0	0	0	0	0	0	0	0	0	0	0	0	0	0	0	0	0	0	0	0	0	0	0	0	0	0	0	0	0	0	0
de23f7c5b016a2e862afa9322d6722ea4f7b64cd	#N/A	Metazoa	0.82	unclassified_Metazoa	0.67	unclassified_Metazoa	0.67	unclassified_Metazoa	0.67	unclassified_Metazoa	0.67	unclassified_Metazoa	0.67	unclassified_Metazoa_sp	0.67	0	0	0	0	0	0	0	0	0	0	0	0	0	0	0	0	0	0	0	0	0	0	0	0	0	0	0	0	0	0	0	0	0	0
861e61df629e6306650c3a5b080ce5b1df2777ab	#N/A	Metazoa	0.83	unclassified_Metazoa	0.65	unclassified_Metazoa	0.65	unclassified_Metazoa	0.65	unclassified_Metazoa	0.65	unclassified_Metazoa	0.65	unclassified_Metazoa_sp	0.65	0	0	0	0	0	0	0	1	0	0	0	0	0	0	0	0	0	0	0	0	0	0	0	0	0	0	0	0	0	0	0	0	0	0
de25082f158c51abe77eb978968fec06e89610c2	#N/A	Metazoa	0.92	unclassified_Metazoa	0.64	unclassified_Metazoa	0.64	unclassified_Metazoa	0.64	unclassified_Metazoa	0.64	unclassified_Metazoa	0.64	unclassified_Metazoa_sp	0.64	0	0	0	0	0	0	0	0	0	0	0	0	0	0	0	0	0	0	0	0	0	0	0	0	0	0	0	0	0	0	0	0	0	0
fb2be3be58d27c41eed121d6dd509c563d767ff9	#N/A	Metazoa	0.88	unclassified_Metazoa	0.64	unclassified_Metazoa	0.64	unclassified_Metazoa	0.64	unclassified_Metazoa	0.64	unclassified_Metazoa	0.64	unclassified_Metazoa_sp	0.64	0	0	0	0	0	0	0	0	0	0	0	0	0	0	0	0	0	0	1	0	0	0	0	0	0	0	0	0	0	0	0	0	0	0
64722230b42562c4d5a6ac00fa0bbe50f8852a39	#N/A	Metazoa	0.8	unclassified_Metazoa	0.64	unclassified_Metazoa	0.64	unclassified_Metazoa	0.64	unclassified_Metazoa	0.64	unclassified_Metazoa	0.64	unclassified_Metazoa_sp	0.64	0	0	0	0	0	0	0	1	0	1	0	0	0	0	0	0	0	0	0	0	0	0	0	0	0	0	0	0	0	0	0	0	0	0
195ef3b136f8a7cc2cbc36cfbb2f189d8ba708cb	#N/A	Metazoa	0.9	unclassified_Metazoa	0.63	unclassified_Metazoa	0.63	unclassified_Metazoa	0.63	unclassified_Metazoa	0.63	unclassified_Metazoa	0.63	unclassified_Metazoa_sp	0.63	0	0	0	0	0	0	0	0	0	0	0	0	0	0	0	0	0	0	0	0	0	0	0	0	0	0	0	0	0	0	0	0	0	0
a652fb23758dd59fdf11eea23aa49da4573a4c59	#N/A	Metazoa	0.82	unclassified_Metazoa	0.63	unclassified_Metazoa	0.63	unclassified_Metazoa	0.63	unclassified_Metazoa	0.63	unclassified_Metazoa	0.63	unclassified_Metazoa_sp	0.63	0	1	1	0	0	0	0	0	2	0	0	0	0	0	0	0	0	0	0	0	0	0	0	0	0	0	0	0	0	2	0	1	0	0
f5e12b333cf5141ffd7b9680e5b84545b63809fd	#N/A	Metazoa	0.81	unclassified_Metazoa	0.63	unclassified_Metazoa	0.63	unclassified_Metazoa	0.63	unclassified_Metazoa	0.63	unclassified_Metazoa	0.63	unclassified_Metazoa_sp	0.63	0	0	0	0	0	0	0	0	17	1	0	0	0	0	0	0	0	0	0	0	0	0	0	0	0	0	0	0	0	0	0	0	0	0
0f098bc52173e4973be1e3431b038d5773502f56	#N/A	Metazoa	0.92	unclassified_Metazoa	0.62	unclassified_Metazoa	0.62	unclassified_Metazoa	0.62	unclassified_Metazoa	0.62	unclassified_Metazoa	0.62	unclassified_Metazoa_sp	0.62	0	0	0	0	0	0	0	0	0	0	0	0	0	0	0	0	0	0	0	0	1	0	0	0	0	0	0	0	0	0	0	0	0	0
9e0f4aec6a47d3de55d33fa74e748f2a1018a42b	#N/A	Metazoa	0.91	unclassified_Metazoa	0.62	unclassified_Metazoa	0.61	unclassified_Metazoa	0.61	unclassified_Metazoa	0.61	unclassified_Metazoa	0.61	unclassified_Metazoa_sp	0.61	0	0	0	0	0	0	0	0	2	0	0	0	0	0	0	0	0	0	0	0	0	0	0	0	0	0	0	0	0	0	0	0	0	0
26f6e87cf90da8f639b2a68eae32baa3c96067a4	#N/A	Metazoa	0.91	unclassified_Metazoa	0.6	unclassified_Metazoa	0.6	unclassified_Metazoa	0.6	unclassified_Metazoa	0.6	unclassified_Metazoa	0.6	unclassified_Metazoa_sp	0.6	0	0	0	1	0	0	0	0	0	0	0	0	0	0	0	0	0	0	0	0	0	0	0	0	0	0	0	0	0	0	0	0	0	0
464b50d6cc8149904bab504c85d0cf75929a2ce0	#N/A	Metazoa	0.84	unclassified_Metazoa	0.61	unclassified_Metazoa	0.61	unclassified_Metazoa	0.6	unclassified_Metazoa	0.6	unclassified_Metazoa	0.6	unclassified_Metazoa_sp	0.6	0	0	0	0	0	0	0	1	0	0	0	0	0	0	0	0	0	0	0	0	0	0	0	0	0	0	0	0	0	0	0	1	0	0
1455737d81727506653e4cdc377846ecb9fd8663	#N/A	Metazoa	0.92	unclassified_Metazoa	0.6	unclassified_Metazoa	0.6	unclassified_Metazoa	0.6	unclassified_Metazoa	0.6	unclassified_Metazoa	0.6	unclassified_Metazoa_sp	0.6	0	0	0	0	0	0	0	0	0	0	0	0	0	0	0	0	0	0	0	0	1	0	0	0	0	0	0	0	0	0	0	0	0	0
208c66d7f3ebaa40eb31900005d2547da6d62f3a	#N/A	Metazoa	0.81	unclassified_Metazoa	0.6	unclassified_Metazoa	0.6	unclassified_Metazoa	0.59	unclassified_Metazoa	0.59	unclassified_Metazoa	0.59	unclassified_Metazoa_sp	0.59	0	0	0	0	0	0	0	0	0	0	0	0	0	0	0	0	0	0	0	0	0	0	0	0	0	0	0	0	0	0	0	0	0	0
24067468e046d2729d3ac334aefff9503ed001da	#N/A	Metazoa	0.81	unclassified_Metazoa	0.71	unclassified_Metazoa	0.61	unclassified_Metazoa	0.59	unclassified_Metazoa	0.59	unclassified_Metazoa	0.59	unclassified_Metazoa_sp	0.59	0	0	0	1	0	0	0	0	0	0	0	0	0	0	0	0	0	0	0	0	0	0	0	0	0	0	0	0	0	0	0	0	0	0
2e827e38ba68b0c1418228f963d9bc7e68a320f6	#N/A	Metazoa	0.97	unclassified_Metazoa	0.59	unclassified_Metazoa	0.59	unclassified_Metazoa	0.59	unclassified_Metazoa	0.59	unclassified_Metazoa	0.59	unclassified_Metazoa_sp	0.59	0	0	0	0	0	0	0	0	0	0	0	0	0	0	0	1	1	0	0	0	0	0	0	0	0	0	0	0	0	0	0	0	0	0
5dd92cf1e8dca4e82c97c9e2f6c6ee5ab1e48dbc	#N/A	Metazoa	0.83	unclassified_Metazoa	0.58	unclassified_Metazoa	0.58	unclassified_Metazoa	0.58	unclassified_Metazoa	0.58	unclassified_Metazoa	0.58	unclassified_Metazoa_sp	0.58	0	0	0	0	0	0	0	0	0	0	0	1	0	0	0	0	0	0	0	0	0	0	0	0	0	0	0	0	0	0	0	0	0	0
3628aa7a00c07b7e9165cb5cb86bcd2b521a5525	#N/A	Metazoa	0.93	unclassified_Metazoa	0.58	unclassified_Metazoa	0.58	unclassified_Metazoa	0.58	unclassified_Metazoa	0.58	unclassified_Metazoa	0.58	unclassified_Metazoa_sp	0.58	0	0	0	0	0	0	0	0	0	0	0	0	0	0	0	0	0	0	0	0	0	0	0	0	0	0	0	0	0	0	0	0	0	0
1ab32b33436b62b78b0490c292fc0f8376cbe6d7	#N/A	Metazoa	0.91	unclassified_Metazoa	0.71	unclassified_Metazoa	0.71	unclassified_Metazoa	0.58	unclassified_Metazoa	0.58	unclassified_Metazoa	0.58	unclassified_Metazoa_sp	0.58	0	1	0	2	0	2	0	0	0	0	0	0	0	0	0	0	0	0	0	0	0	0	0	0	0	0	0	0	0	0	0	0	0	0
007eaae7da13eba10b0427e5d99bd38df17b27af	#N/A	Metazoa	0.88	unclassified_Metazoa	0.58	unclassified_Metazoa	0.58	unclassified_Metazoa	0.58	unclassified_Metazoa	0.58	unclassified_Metazoa	0.58	unclassified_Metazoa_sp	0.58	0	0	0	0	0	0	1	0	0	1	0	0	0	0	0	0	0	0	0	0	0	0	0	0	0	0	0	0	0	0	0	0	0	0
0eefaa82e15fdbed8391366f1ae65bce38657f9e	#N/A	Metazoa	0.96	unclassified_Metazoa	0.74	unclassified_Metazoa	0.74	unclassified_Metazoa	0.59	unclassified_Metazoa	0.57	unclassified_Metazoa	0.57	unclassified_Metazoa_sp	0.57	0	0	0	0	0	0	0	0	0	0	0	0	0	0	0	0	0	0	0	0	0	0	0	0	0	0	0	0	0	0	0	0	1	0
3d86fc9ab762dafaafafd6934335f1be3ca0133d	#N/A	Metazoa	0.85	unclassified_Metazoa	0.61	unclassified_Metazoa	0.57	unclassified_Metazoa	0.57	unclassified_Metazoa	0.57	unclassified_Metazoa	0.57	unclassified_Metazoa_sp	0.57	0	0	0	0	0	0	0	0	0	0	0	0	0	0	0	0	0	0	0	0	0	0	0	0	0	0	0	1	0	0	0	0	0	0
528bb5f85090ac9f51e88df19a5fdd0c440ace1c	#N/A	Metazoa	1	unclassified_Metazoa	0.57	unclassified_Metazoa	0.57	unclassified_Metazoa	0.57	unclassified_Metazoa	0.57	unclassified_Metazoa	0.57	unclassified_Metazoa_sp	0.57	0	0	0	0	0	0	0	0	0	0	0	0	0	0	0	0	0	0	0	0	0	0	0	0	0	0	0	0	0	0	0	0	0	0
e347477738c7b91dd5cd5fce25f5527029e8b282	#N/A	Metazoa	0.9	unclassified_Metazoa	0.65	unclassified_Metazoa	0.65	unclassified_Metazoa	0.61	unclassified_Metazoa	0.57	unclassified_Metazoa	0.57	unclassified_Metazoa_sp	0.57	0	0	1	0	0	0	0	0	0	0	0	0	0	0	0	0	0	0	0	0	0	0	0	0	0	0	0	0	0	0	0	0	0	0
6ec9f033559954c2da6bc82cfd52e6a20fe824af	#N/A	Metazoa	0.99	unclassified_Metazoa	0.73	unclassified_Metazoa	0.68	unclassified_Metazoa	0.65	unclassified_Metazoa	0.65	unclassified_Metazoa	0.56	unclassified_Metazoa_sp	0.56	0	0	0	0	0	0	0	0	0	0	0	0	0	0	0	0	0	0	0	0	0	0	0	0	0	0	0	0	0	0	0	0	0	0
7bc601a9742a7885a179dff68e5c94addd8ef8a8	#N/A	Metazoa	0.86	unclassified_Metazoa	0.56	unclassified_Metazoa	0.56	unclassified_Metazoa	0.56	unclassified_Metazoa	0.56	unclassified_Metazoa	0.56	unclassified_Metazoa_sp	0.56	0	0	0	0	0	0	0	0	0	0	0	0	0	0	0	0	0	0	0	0	0	0	0	0	0	0	0	0	0	0	0	0	0	0
ba8757891d3a5957da320768240f26b645861fba	#N/A	Metazoa	0.92	unclassified_Metazoa	0.79	unclassified_Metazoa	0.73	unclassified_Metazoa	0.61	unclassified_Metazoa	0.56	unclassified_Metazoa	0.56	unclassified_Metazoa_sp	0.56	0	0	0	0	0	0	0	0	0	0	0	0	0	0	0	0	0	0	0	0	0	0	0	0	0	0	0	0	0	0	0	0	0	0
0b9af627d9b57d8a384f431d2727dbea5f823e54	#N/A	Metazoa	0.88	unclassified_Metazoa	0.56	unclassified_Metazoa	0.56	unclassified_Metazoa	0.56	unclassified_Metazoa	0.56	unclassified_Metazoa	0.56	unclassified_Metazoa_sp	0.56	0	0	0	0	0	0	0	0	0	0	0	0	0	0	0	0	0	0	0	0	0	0	0	0	0	0	0	1	0	0	0	0	0	0
df03b86148c361b13c23d3fd3ae0ce3009db6973	#N/A	Metazoa	0.81	unclassified_Metazoa	0.57	unclassified_Metazoa	0.57	unclassified_Metazoa	0.56	unclassified_Metazoa	0.56	unclassified_Metazoa	0.56	unclassified_Metazoa_sp	0.56	0	0	0	0	0	0	0	0	0	0	0	0	0	0	0	0	0	0	0	0	0	0	0	0	0	0	0	0	0	0	0	0	0	0
fa3035b5280f5000778c189277e19900d6a93a0f	#N/A	Metazoa	0.83	unclassified_Metazoa	0.56	unclassified_Metazoa	0.56	unclassified_Metazoa	0.56	unclassified_Metazoa	0.56	unclassified_Metazoa	0.56	unclassified_Metazoa_sp	0.56	0	0	0	0	0	0	0	0	0	0	0	0	0	0	0	0	0	0	0	0	0	0	0	0	0	0	0	0	0	0	0	0	0	0
fb8362bbe99f6473861e209c2f1e4abf901c4359	#N/A	Metazoa	0.99	unclassified_Metazoa	0.74	unclassified_Metazoa	0.74	unclassified_Metazoa	0.72	unclassified_Metazoa	0.71	unclassified_Metazoa	0.56	unclassified_Metazoa_sp	0.55	0	0	0	0	0	0	0	1	0	0	0	0	0	0	0	0	0	0	0	0	0	0	0	0	0	0	0	0	0	0	0	0	0	0
6fc0fd372b315d59d29cfd3aeacd309dd2277870	#N/A	Metazoa	0.91	unclassified_Metazoa	0.74	unclassified_Metazoa	0.74	unclassified_Metazoa	0.68	unclassified_Metazoa	0.64	unclassified_Metazoa	0.56	unclassified_Metazoa_sp	0.5	0	0	0	0	0	0	0	0	0	0	0	0	0	0	0	1	0	0	0	0	0	0	0	0	0	0	0	0	0	0	0	0	0	0
5c1b6d3ea266b2b57c755f3be7eefbe7a7d984c5	#N/A	Metazoa	0.8	unclassified_Metazoa	0.55	unclassified_Metazoa	0.55	unclassified_Metazoa	0.55	unclassified_Metazoa	0.55	unclassified_Metazoa	0.55	unclassified_Metazoa_sp	0.55	0	0	0	0	0	0	0	0	0	0	0	0	0	0	0	0	0	0	0	0	0	0	1	0	0	0	0	0	0	0	0	0	0	0
ddbea5486de37d74935d8069a2c37a551ad19b6a	#N/A	Metazoa	0.87	unclassified_Metazoa	0.55	unclassified_Metazoa	0.55	unclassified_Metazoa	0.55	unclassified_Metazoa	0.55	unclassified_Metazoa	0.55	unclassified_Metazoa_sp	0.55	0	0	0	0	0	0	0	0	0	0	0	0	0	0	0	0	0	0	0	0	0	0	0	0	0	0	0	0	0	0	0	0	0	0
019b7fdefb90db2ac516bb69d5b60830523c3caf	#N/A	Metazoa	1	unclassified_Metazoa	0.54	unclassified_Metazoa	0.54	unclassified_Metazoa	0.54	unclassified_Metazoa	0.54	unclassified_Metazoa	0.54	unclassified_Metazoa_sp	0.54	0	0	0	0	0	0	0	0	1	0	0	0	0	0	0	0	0	0	0	0	0	0	0	0	0	0	0	0	0	0	0	0	0	0
02f94614b8266407408007f814d3a4df7c00c325	#N/A	Metazoa	0.94	unclassified_Metazoa	0.62	unclassified_Metazoa	0.54	unclassified_Metazoa	0.54	unclassified_Metazoa	0.54	unclassified_Metazoa	0.54	unclassified_Metazoa_sp	0.54	0	1	0	0	0	0	0	0	0	0	0	0	0	0	0	0	0	0	0	0	0	0	0	0	0	0	0	0	0	0	0	0	0	0
2c7611c821c06160ea31f4eb6f4ae313a8ce5bde	#N/A	Metazoa	0.89	unclassified_Metazoa	0.6	unclassified_Metazoa	0.55	unclassified_Metazoa	0.54	unclassified_Metazoa	0.54	unclassified_Metazoa	0.54	unclassified_Metazoa_sp	0.54	0	0	0	0	0	1	0	0	0	0	0	0	0	0	0	0	0	0	0	0	0	0	0	0	0	0	0	0	0	0	0	0	0	0
9533da723677b43f5416c04e00a22d542b6e2e21	#N/A	Metazoa	0.83	unclassified_Metazoa	0.55	unclassified_Metazoa	0.55	unclassified_Metazoa	0.54	unclassified_Metazoa	0.54	unclassified_Metazoa	0.54	unclassified_Metazoa_sp	0.54	0	0	0	0	0	0	0	0	0	0	0	0	0	0	0	0	0	0	0	0	0	0	0	0	0	0	0	0	0	0	0	0	0	0
d8cfd18f72a9180b1e293376581dc57c87e0056d	#N/A	Metazoa	0.83	unclassified_Metazoa	0.54	unclassified_Metazoa	0.54	unclassified_Metazoa	0.54	unclassified_Metazoa	0.54	unclassified_Metazoa	0.54	unclassified_Metazoa_sp	0.54	0	1	0	0	0	0	0	0	0	0	0	0	0	0	0	0	0	0	0	0	0	0	0	0	0	0	0	0	0	0	2	0	0	0
957f567c89ef5ad476fd2641d93182a38ce3a4d4	#N/A	Metazoa	0.97	unclassified_Metazoa	0.55	unclassified_Metazoa	0.55	unclassified_Metazoa	0.54	unclassified_Metazoa	0.54	unclassified_Metazoa	0.54	unclassified_Metazoa_sp	0.54	0	0	1	9	0	0	0	4	0	0	0	1	0	0	0	0	0	0	0	0	0	0	0	0	0	0	0	0	0	0	0	0	0	0
4c2fc16a05b1c912e28f94227278bed2c5025af1	#N/A	Metazoa	0.98	unclassified_Metazoa	0.53	unclassified_Metazoa	0.53	unclassified_Metazoa	0.53	unclassified_Metazoa	0.53	unclassified_Metazoa	0.53	unclassified_Metazoa_sp	0.53	0	0	0	0	0	0	0	0	0	0	0	0	0	0	0	0	0	0	0	0	0	0	0	0	0	0	0	0	0	0	0	0	0	0
42e2989529fa5400c662fc92533b546bed7983f8	#N/A	Metazoa	0.82	unclassified_Metazoa	0.57	unclassified_Metazoa	0.53	unclassified_Metazoa	0.53	unclassified_Metazoa	0.53	unclassified_Metazoa	0.53	unclassified_Metazoa_sp	0.53	0	0	0	0	0	0	0	0	0	0	0	0	0	0	0	0	0	0	0	0	0	0	0	0	0	0	0	5	2	0	0	0	0	0
b56c504556e6405f99e8d4a4ac6c969b1a9f7ef5	#N/A	Metazoa	0.9	unclassified_Metazoa	0.53	unclassified_Metazoa	0.53	unclassified_Metazoa	0.53	unclassified_Metazoa	0.53	unclassified_Metazoa	0.53	unclassified_Metazoa_sp	0.53	0	0	0	0	0	0	0	0	0	1	0	0	0	0	0	0	0	0	0	0	0	0	0	0	0	0	0	0	0	0	0	0	0	0
bf6e7f61d81819092076cb1a75a7c57d9fe99340	#N/A	Metazoa	0.95	unclassified_Metazoa	0.52	unclassified_Metazoa	0.52	unclassified_Metazoa	0.52	unclassified_Metazoa	0.52	unclassified_Metazoa	0.52	unclassified_Metazoa_sp	0.52	0	0	0	0	0	0	1	0	0	0	0	0	0	0	0	0	0	0	0	0	0	0	0	0	0	0	0	0	0	0	0	0	0	0
8e05068d0efea5b90da4555d9e841b998e5d60e1	#N/A	Metazoa	0.81	unclassified_Metazoa	0.52	unclassified_Metazoa	0.52	unclassified_Metazoa	0.52	unclassified_Metazoa	0.52	unclassified_Metazoa	0.52	unclassified_Metazoa_sp	0.52	0	0	0	0	0	0	0	2	0	0	0	0	0	0	0	0	0	0	0	0	0	0	0	0	0	0	0	0	0	0	0	0	0	0
7575e4119f49837d5bc3b1ae93e05879bac67385	#N/A	Metazoa	0.84	unclassified_Metazoa	0.69	unclassified_Metazoa	0.69	unclassified_Metazoa	0.55	unclassified_Metazoa	0.53	unclassified_Metazoa	0.52	unclassified_Metazoa_sp	0.47	0	0	0	0	0	0	0	0	0	0	0	0	0	0	1	0	0	0	0	0	0	0	0	0	0	0	0	0	0	0	0	0	0	0
145f48eee07a0a4d0d849ed8243bba8c83ba006f	#N/A	Metazoa	0.83	unclassified_Metazoa	0.51	unclassified_Metazoa	0.51	unclassified_Metazoa	0.51	unclassified_Metazoa	0.51	unclassified_Metazoa	0.51	unclassified_Metazoa_sp	0.51	0	0	0	0	0	0	0	0	0	0	0	0	0	0	0	0	0	0	0	0	0	0	0	0	0	0	0	1	0	0	0	0	0	0
e4fb80fd6022c925d4c54c244f2952e2d8f0c7d3	#N/A	Metazoa	0.88	unclassified_Metazoa	0.51	unclassified_Metazoa	0.51	unclassified_Metazoa	0.51	unclassified_Metazoa	0.51	unclassified_Metazoa	0.51	unclassified_Metazoa_sp	0.51	0	0	0	0	0	0	0	0	0	0	0	0	0	0	0	0	0	0	0	0	0	0	0	0	0	0	1	0	0	0	0	0	0	0
e5a657ecf7396793aa413e323df7f96008f54367	#N/A	Metazoa	0.84	unclassified_Metazoa	0.51	unclassified_Metazoa	0.51	unclassified_Metazoa	0.51	unclassified_Metazoa	0.51	unclassified_Metazoa	0.51	unclassified_Metazoa_sp	0.51	0	0	0	0	0	0	0	0	0	0	1	0	0	0	0	0	0	0	0	0	0	0	0	0	0	0	0	0	0	0	0	0	0	0
0372e86531db16f1326a34c248ad2fe0d48928dd	#N/A	Metazoa	0.82	unclassified_Metazoa	0.52	unclassified_Metazoa	0.52	unclassified_Metazoa	0.51	unclassified_Metazoa	0.51	unclassified_Metazoa	0.51	unclassified_Metazoa_sp	0.51	0	0	0	0	0	0	0	0	0	0	0	0	0	0	0	0	0	0	0	0	0	0	0	0	0	0	0	0	0	0	0	0	0	0
b6674aa4147eae26ca6c441d26a9c3c8baf92eba	#N/A	Metazoa	0.98	unclassified_Metazoa	0.71	unclassified_Metazoa	0.71	unclassified_Metazoa	0.51	unclassified_Metazoa	0.51	unclassified_Metazoa	0.51	unclassified_Metazoa_sp	0.48	0	1	0	0	0	0	0	0	0	0	0	0	0	0	0	0	0	0	0	0	0	0	0	0	0	0	0	0	0	0	0	0	0	0
24b4429db5f6b20ae34b5b337916f48d6ad0aa73	#N/A	Metazoa	0.89	unclassified_Metazoa	0.5	unclassified_Metazoa	0.5	unclassified_Metazoa	0.5	unclassified_Metazoa	0.5	unclassified_Metazoa	0.5	unclassified_Metazoa_sp	0.5	0	0	0	0	0	0	0	0	0	0	0	0	0	0	0	0	0	0	0	0	0	0	0	0	0	0	0	0	0	0	0	0	0	0
6c46dae102b3729ca29e4072ef11f885577c4d25	#N/A	Metazoa	0.84	unclassified_Metazoa	0.59	unclassified_Metazoa	0.53	unclassified_Metazoa	0.5	unclassified_Metazoa	0.5	unclassified_Metazoa	0.5	unclassified_Metazoa_sp	0.5	0	0	0	0	0	0	0	0	0	0	0	0	0	0	0	0	0	0	0	0	0	0	0	0	0	0	0	0	0	0	0	0	0	0
ecb989add9fca525e8d107e61107fe690e441cdc	#N/A	Metazoa	0.86	unclassified_Metazoa	0.51	unclassified_Metazoa	0.51	unclassified_Metazoa	0.5	unclassified_Metazoa	0.5	unclassified_Metazoa	0.5	unclassified_Metazoa_sp	0.5	1	0	0	0	0	0	0	0	0	0	0	0	0	0	0	0	0	0	0	0	0	0	0	0	0	0	0	0	0	0	0	0	0	0
1e988da499d8dd60d00c8a5177b7ca6e89c9fc59	#N/A	Metazoa	0.91	unclassified_Metazoa	0.5	unclassified_Metazoa	0.5	unclassified_Metazoa	0.49	unclassified_Metazoa	0.49	unclassified_Metazoa	0.49	unclassified_Metazoa_sp	0.49	1	0	0	0	0	0	0	0	0	0	0	0	0	0	0	0	0	0	0	0	0	0	0	0	0	0	0	0	0	0	0	0	0	0
ab1d525734c5eb079eb02dbcc2f9d80ab5da0e0d	#N/A	Metazoa	0.96	unclassified_Metazoa	0.59	unclassified_Metazoa	0.49	unclassified_Metazoa	0.49	unclassified_Metazoa	0.49	unclassified_Metazoa	0.49	unclassified_Metazoa_sp	0.49	0	0	0	0	0	0	0	0	0	0	0	0	0	0	0	0	0	0	0	0	0	0	0	0	0	0	0	0	0	0	0	0	0	0
e8f3286f4b999f15bd64bdf00d44298052b37e12	#N/A	Metazoa	0.93	unclassified_Metazoa	0.49	unclassified_Metazoa	0.49	unclassified_Metazoa	0.49	unclassified_Metazoa	0.49	unclassified_Metazoa	0.49	unclassified_Metazoa_sp	0.49	0	0	0	0	0	0	1	0	0	0	0	0	0	0	0	0	0	0	0	0	0	0	0	0	0	0	0	0	0	0	0	0	0	0
f7a13b0718ae476c4e42bdc0e1c1bddcfe02445a	#N/A	Metazoa	0.83	unclassified_Metazoa	0.49	unclassified_Metazoa	0.49	unclassified_Metazoa	0.49	unclassified_Metazoa	0.49	unclassified_Metazoa	0.49	unclassified_Metazoa_sp	0.49	0	0	0	0	0	0	0	0	0	0	0	0	0	0	0	0	0	0	0	0	0	0	0	0	0	0	0	0	0	0	0	0	0	0
558df7baeebbefd364e38773872cbffc3cf948ee	#N/A	Metazoa	0.8	unclassified_Metazoa	0.49	unclassified_Metazoa	0.49	unclassified_Metazoa	0.48	unclassified_Metazoa	0.48	unclassified_Metazoa	0.48	unclassified_Metazoa_sp	0.48	0	0	0	0	0	0	0	0	0	0	0	0	0	0	0	0	0	0	0	0	0	0	0	0	0	0	0	0	0	0	0	0	0	0
5af7934c685190f1c0ebef71e590fde8e456dd3e	#N/A	Metazoa	0.85	unclassified_Metazoa	0.48	unclassified_Metazoa	0.48	unclassified_Metazoa	0.48	unclassified_Metazoa	0.48	unclassified_Metazoa	0.48	unclassified_Metazoa_sp	0.48	0	0	0	0	0	0	0	0	0	0	0	0	0	0	0	0	0	0	0	0	0	0	0	0	0	0	0	0	0	0	0	0	0	0
d4262dfe04e69f7003c0318668408b06442c9ea6	#N/A	Metazoa	0.86	unclassified_Metazoa	0.48	unclassified_Metazoa	0.48	unclassified_Metazoa	0.48	unclassified_Metazoa	0.48	unclassified_Metazoa	0.48	unclassified_Metazoa_sp	0.48	0	0	0	0	0	0	0	0	0	0	0	0	0	0	0	0	0	0	0	0	0	0	0	0	0	0	0	0	0	0	0	0	0	0
d92b49a893f7dee48f99f820698cce4bc92db59e	#N/A	Metazoa	0.84	unclassified_Metazoa	0.49	unclassified_Metazoa	0.49	unclassified_Metazoa	0.48	unclassified_Metazoa	0.48	unclassified_Metazoa	0.48	unclassified_Metazoa_sp	0.48	0	0	3	0	0	0	0	0	0	0	0	0	0	0	0	0	0	0	0	0	0	0	0	0	0	0	0	0	0	0	0	0	0	0
6c23b45c028b1d4b088f6f34b3c3342a5c816d2d	#N/A	Metazoa	1	unclassified_Metazoa	0.59	unclassified_Metazoa	0.57	unclassified_Metazoa	0.52	unclassified_Metazoa	0.5	unclassified_Metazoa	0.48	unclassified_Metazoa_sp	0.46	0	0	0	0	0	0	0	0	0	0	0	0	0	0	0	0	0	0	0	0	0	0	0	0	0	0	0	0	0	1	0	0	0	0
00654b24848c6195a69290094a01afcc7386fbe3	#N/A	Metazoa	0.87	unclassified_Metazoa	0.5	unclassified_Metazoa	0.5	unclassified_Metazoa	0.47	unclassified_Metazoa	0.47	unclassified_Metazoa	0.47	unclassified_Metazoa_sp	0.47	0	0	0	0	0	0	0	0	0	0	0	0	0	0	0	0	0	0	0	0	0	0	0	0	0	0	0	0	0	0	0	0	0	0
7ebfcffad539ace6b5e1441a059343bb854dab47	#N/A	Metazoa	0.83	unclassified_Metazoa	0.47	unclassified_Metazoa	0.47	unclassified_Metazoa	0.47	unclassified_Metazoa	0.47	unclassified_Metazoa	0.47	unclassified_Metazoa_sp	0.47	0	0	0	0	0	0	1	0	0	0	0	0	0	0	0	0	0	0	0	0	0	0	0	0	0	0	0	0	0	0	0	0	0	0
adb1a3eaba825a86af2d9cb60084f2acf076ce3a	#N/A	Metazoa	0.93	unclassified_Metazoa	0.48	unclassified_Metazoa	0.48	unclassified_Metazoa	0.47	unclassified_Metazoa	0.47	unclassified_Metazoa	0.47	unclassified_Metazoa_sp	0.47	0	0	0	0	0	0	0	0	0	0	0	0	0	0	0	0	0	0	0	0	0	0	0	0	0	0	0	0	0	0	0	0	0	0
291a11fed1e05bbfb588d82876f65e64fcda0bd6	#N/A	Metazoa	0.94	unclassified_Metazoa	0.57	unclassified_Metazoa	0.46	unclassified_Metazoa	0.46	unclassified_Metazoa	0.46	unclassified_Metazoa	0.46	unclassified_Metazoa_sp	0.46	0	0	0	0	0	0	0	0	0	0	0	0	0	0	0	0	0	0	0	0	0	0	0	0	0	0	0	0	0	0	0	0	0	0
eae5988facab02bb1cffd1781960122e143636f5	#N/A	Metazoa	0.86	unclassified_Metazoa	0.46	unclassified_Metazoa	0.46	unclassified_Metazoa	0.46	unclassified_Metazoa	0.46	unclassified_Metazoa	0.46	unclassified_Metazoa_sp	0.46	0	0	0	0	0	0	0	0	0	0	0	0	0	0	0	0	0	0	0	0	0	0	0	0	0	0	0	0	0	0	0	0	0	0
770c93a6bf1c9623e7503e482e4580f5c233260f	#N/A	Metazoa	0.82	unclassified_Metazoa	0.66	unclassified_Metazoa	0.5	unclassified_Metazoa	0.47	unclassified_Metazoa	0.46	unclassified_Metazoa	0.46	unclassified_Metazoa_sp	0.46	0	0	0	0	0	0	0	0	0	0	0	0	0	0	0	0	0	0	0	0	0	0	0	0	0	0	0	0	0	3	0	0	0	0
499a671056cfd63f193e7e264be7439fb3f5746a	#N/A	Metazoa	0.94	unclassified_Metazoa	0.68	unclassified_Metazoa	0.68	unclassified_Metazoa	0.61	unclassified_Metazoa	0.46	unclassified_Metazoa	0.46	unclassified_Metazoa_sp	0.44	0	0	0	0	0	0	0	0	0	0	0	0	0	0	0	0	0	0	0	0	0	0	0	0	0	0	0	0	0	0	0	0	0	0
6457f5f72812dca8a2f73f2f83dbb35c7c066b59	#N/A	Metazoa	0.92	unclassified_Metazoa	0.45	unclassified_Metazoa	0.45	unclassified_Metazoa	0.45	unclassified_Metazoa	0.45	unclassified_Metazoa	0.45	unclassified_Metazoa_sp	0.45	0	0	0	1	0	0	0	0	0	0	0	0	0	0	0	0	0	0	0	0	0	0	0	0	0	0	0	0	0	0	0	0	0	0
a9040485ec5916ad9fb9625df1dd16fa80001d2a	#N/A	Metazoa	0.89	unclassified_Metazoa	0.45	unclassified_Metazoa	0.45	unclassified_Metazoa	0.45	unclassified_Metazoa	0.45	unclassified_Metazoa	0.45	unclassified_Metazoa_sp	0.45	0	0	0	0	0	0	0	0	0	1	0	0	0	0	0	0	0	0	0	0	0	0	0	0	0	0	0	0	0	0	0	0	0	0
ce2ca86218f71993f572976b9d5db39a9f7436da	#N/A	Metazoa	0.84	unclassified_Metazoa	0.45	unclassified_Metazoa	0.45	unclassified_Metazoa	0.45	unclassified_Metazoa	0.45	unclassified_Metazoa	0.45	unclassified_Metazoa_sp	0.45	0	0	0	0	0	0	0	0	0	0	0	0	0	0	0	0	0	0	0	0	0	0	0	0	0	0	0	0	0	0	0	0	0	0
57535ecc094bc31fffe08881f93539c62a80ca1e	#N/A	Metazoa	0.99	unclassified_Metazoa	0.7	unclassified_Metazoa	0.7	unclassified_Metazoa	0.64	unclassified_Metazoa	0.5	unclassified_Metazoa	0.45	unclassified_Metazoa_sp	0.4	0	0	0	0	0	0	0	0	0	0	0	0	0	0	0	0	0	0	0	0	0	0	0	0	0	0	0	0	0	0	0	0	0	0
32612dd7879d5866775effaae9aba212f9f6ca81	#N/A	Metazoa	0.9	unclassified_Metazoa	0.44	unclassified_Metazoa	0.44	unclassified_Metazoa	0.44	unclassified_Metazoa	0.44	unclassified_Metazoa	0.44	unclassified_Metazoa_sp	0.44	0	0	0	0	0	0	0	0	0	0	0	0	0	0	0	0	0	0	0	0	0	0	0	0	0	0	0	0	0	0	0	0	0	0
84b1ba020960d3a4e9952c97e6ccdee2fe500b4f	#N/A	Metazoa	0.85	unclassified_Metazoa	0.46	unclassified_Metazoa	0.44	unclassified_Metazoa	0.44	unclassified_Metazoa	0.44	unclassified_Metazoa	0.44	unclassified_Metazoa_sp	0.44	0	0	0	0	0	0	0	0	0	0	0	0	0	0	0	0	0	0	0	1	0	0	0	0	0	0	0	0	0	0	0	0	0	0
81f2a4cd4d11ed9708f1184a27f48757113f06bf	#N/A	Metazoa	0.91	unclassified_Metazoa	0.45	unclassified_Metazoa	0.45	unclassified_Metazoa	0.44	unclassified_Metazoa	0.44	unclassified_Metazoa	0.44	unclassified_Metazoa_sp	0.44	0	0	0	0	0	0	0	0	0	0	0	0	0	0	0	0	0	0	0	0	0	0	0	0	0	0	0	0	0	1	0	0	0	0
b10ad2c6e1a8abd0406f45aa9755c6e105c08861	#N/A	Metazoa	0.92	unclassified_Metazoa	0.69	unclassified_Metazoa	0.69	unclassified_Metazoa	0.66	unclassified_Metazoa	0.51	unclassified_Metazoa	0.44	unclassified_Metazoa_sp	0.4	1	0	0	0	0	0	0	0	0	0	0	0	0	0	0	0	0	0	0	0	0	0	0	0	0	0	0	0	0	0	0	0	0	0
704ee0640d246c81cacc39f24803b939c49171a5	#N/A	Metazoa	0.97	unclassified_Metazoa	0.7	unclassified_Metazoa	0.7	unclassified_Metazoa	0.63	unclassified_Metazoa	0.55	unclassified_Metazoa	0.44	unclassified_Metazoa_sp	0.23	0	0	0	0	0	0	0	0	0	0	0	0	0	0	0	0	0	0	0	1	0	0	0	0	0	0	0	0	0	0	0	0	0	0
1517fda0f3bd0f2ab6c995ca8e426b4e3378a9c5	#N/A	Metazoa	0.82	unclassified_Metazoa	0.6	unclassified_Metazoa	0.44	unclassified_Metazoa	0.44	unclassified_Metazoa	0.43	unclassified_Metazoa	0.43	unclassified_Metazoa_sp	0.43	0	0	0	0	0	0	0	0	0	0	0	0	0	0	0	0	0	0	0	0	0	0	0	0	0	0	0	0	0	0	0	0	0	0
367b4a7fefcb935cfb3a4c384041bb6644a8dead	#N/A	Metazoa	0.83	unclassified_Metazoa	0.43	unclassified_Metazoa	0.43	unclassified_Metazoa	0.43	unclassified_Metazoa	0.43	unclassified_Metazoa	0.43	unclassified_Metazoa_sp	0.43	0	0	0	0	0	0	0	0	0	0	0	0	0	0	0	0	0	0	0	0	0	0	0	0	0	0	0	0	0	0	0	0	0	0
58aaddc93e9eb9635cd7716828e22631f2599e15	#N/A	Metazoa	0.84	unclassified_Metazoa	0.43	unclassified_Metazoa	0.43	unclassified_Metazoa	0.43	unclassified_Metazoa	0.43	unclassified_Metazoa	0.43	unclassified_Metazoa_sp	0.43	0	0	0	0	0	0	0	0	0	0	0	0	0	0	0	0	0	0	0	0	0	0	0	0	0	0	0	0	0	0	0	0	0	0
c60e91e984cf4983178b018e0e2132747f0ca3d1	#N/A	Metazoa	0.84	unclassified_Metazoa	0.44	unclassified_Metazoa	0.44	unclassified_Metazoa	0.43	unclassified_Metazoa	0.43	unclassified_Metazoa	0.43	unclassified_Metazoa_sp	0.43	0	0	1	0	0	0	0	0	0	0	0	0	0	0	0	0	0	0	0	0	0	0	0	0	0	0	0	0	0	0	0	0	0	0
053a06ec9f33957f9c0533fe6e5c66b7a5fa8205	#N/A	Metazoa	0.85	unclassified_Metazoa	0.44	unclassified_Metazoa	0.44	unclassified_Metazoa	0.43	unclassified_Metazoa	0.43	unclassified_Metazoa	0.43	unclassified_Metazoa_sp	0.43	0	0	0	0	0	0	0	1	0	0	0	0	0	0	0	0	0	0	0	0	0	0	0	0	0	0	0	0	0	0	0	0	0	0
36de912f3435a3e63c1f6522495e6252358556ff	#N/A	Metazoa	0.81	unclassified_Metazoa	0.43	unclassified_Metazoa	0.43	unclassified_Metazoa	0.43	unclassified_Metazoa	0.43	unclassified_Metazoa	0.43	unclassified_Metazoa_sp	0.43	0	0	0	0	0	0	0	2	0	0	0	0	0	0	0	0	0	0	0	0	0	0	0	0	0	0	0	0	0	0	0	0	0	0
04362eb66607a7dbe2298d0118e0d951a6af8997	#N/A	Metazoa	0.83	unclassified_Metazoa	0.44	unclassified_Metazoa	0.44	unclassified_Metazoa	0.42	unclassified_Metazoa	0.42	unclassified_Metazoa	0.42	unclassified_Metazoa_sp	0.42	0	0	0	0	0	0	0	0	1	0	0	0	0	0	0	0	0	0	0	0	0	0	0	0	0	0	0	0	0	0	0	0	0	0
9325f2ee620561abcfb1095139a100a38898d86b	#N/A	Metazoa	0.82	unclassified_Metazoa	0.42	unclassified_Metazoa	0.42	unclassified_Metazoa	0.42	unclassified_Metazoa	0.42	unclassified_Metazoa	0.42	unclassified_Metazoa_sp	0.42	0	0	0	0	0	0	0	0	0	0	0	0	0	0	0	0	0	0	0	0	0	0	0	0	0	0	0	0	0	0	0	0	0	0
6952b58e9ed138b26a1a090dfc11134c9e29a646	#N/A	Metazoa	0.81	unclassified_Metazoa	0.43	unclassified_Metazoa	0.42	unclassified_Metazoa	0.42	unclassified_Metazoa	0.42	unclassified_Metazoa	0.42	unclassified_Metazoa_sp	0.42	0	0	0	0	0	0	0	2	3	0	0	0	0	0	0	0	0	0	0	0	0	0	0	0	0	0	0	0	0	0	4	1	0	0
035dc1b80180620eb8fbf53f8ea8c4a26c173f2f	#N/A	Metazoa	0.9	unclassified_Metazoa	0.41	unclassified_Metazoa	0.41	unclassified_Metazoa	0.41	unclassified_Metazoa	0.41	unclassified_Metazoa	0.41	unclassified_Metazoa_sp	0.41	0	0	0	0	0	0	0	0	0	0	1	0	0	0	0	0	0	0	0	0	0	0	0	0	0	0	0	0	0	0	0	0	0	0
0c46c6d4a593131e38ea09fceae1a6dd213d5cb4	#N/A	Metazoa	0.9	unclassified_Metazoa	0.41	unclassified_Metazoa	0.41	unclassified_Metazoa	0.41	unclassified_Metazoa	0.41	unclassified_Metazoa	0.41	unclassified_Metazoa_sp	0.41	0	0	0	0	0	0	0	0	0	0	0	0	0	0	0	0	0	0	0	0	0	0	0	0	0	0	0	0	0	0	0	0	0	0
3959ce6e933252c4b7e91acfeddffd494c3baf39	#N/A	Metazoa	0.83	unclassified_Metazoa	0.55	unclassified_Metazoa	0.55	unclassified_Metazoa	0.53	unclassified_Metazoa	0.44	unclassified_Metazoa	0.41	unclassified_Metazoa_sp	0.41	0	0	0	0	0	0	0	0	0	0	0	0	0	1	0	0	0	0	0	0	0	0	0	0	0	0	0	0	0	0	0	0	0	0
8759519244e5d828a0cdbd3a3ed75693dbcd4011	#N/A	Metazoa	1	unclassified_Metazoa	0.45	unclassified_Metazoa	0.45	unclassified_Metazoa	0.41	unclassified_Metazoa	0.41	unclassified_Metazoa	0.41	unclassified_Metazoa_sp	0.41	0	0	0	0	0	0	1	0	0	0	0	0	0	0	0	0	0	0	0	0	0	0	0	0	0	0	0	0	0	0	0	0	0	0
cd30eef82689168ffbd49f6195df87129c77f1c9	#N/A	Metazoa	0.8	unclassified_Metazoa	0.41	unclassified_Metazoa	0.41	unclassified_Metazoa	0.41	unclassified_Metazoa	0.41	unclassified_Metazoa	0.41	unclassified_Metazoa_sp	0.41	0	0	0	0	0	0	0	0	0	0	0	0	0	0	0	0	0	0	0	0	0	0	0	0	0	0	0	0	0	0	1	0	0	0
dd43c5648ce2fd614e44617f7835cac5e59d2da4	#N/A	Metazoa	0.85	unclassified_Metazoa	0.41	unclassified_Metazoa	0.41	unclassified_Metazoa	0.41	unclassified_Metazoa	0.41	unclassified_Metazoa	0.41	unclassified_Metazoa_sp	0.41	0	0	0	0	0	0	0	0	0	0	0	0	0	0	0	0	0	0	0	0	0	0	0	0	0	0	1	0	0	0	0	0	0	0
fcf947edfaf4b7be396587b7208d0cd257ecef87	#N/A	Metazoa	0.86	unclassified_Metazoa	0.41	unclassified_Metazoa	0.41	unclassified_Metazoa	0.41	unclassified_Metazoa	0.41	unclassified_Metazoa	0.41	unclassified_Metazoa_sp	0.41	0	0	0	0	0	0	0	0	0	0	0	0	0	0	0	0	0	0	0	0	0	0	0	0	0	0	0	0	0	0	0	0	0	0
402ea9c90aa0923d66173adf328cad601dcb8ea8	#N/A	Metazoa	0.88	unclassified_Metazoa	0.41	unclassified_Metazoa	0.41	unclassified_Metazoa	0.41	unclassified_Metazoa	0.41	unclassified_Metazoa	0.41	unclassified_Metazoa_sp	0.41	0	0	0	0	0	0	0	0	0	0	0	0	0	0	0	0	0	0	0	0	0	0	0	0	0	0	1	1	0	0	0	0	0	0
def1d1ae5d529b05198b8372f7dd14d34b6dc893	#N/A	Metazoa	0.82	unclassified_Metazoa	0.41	unclassified_Metazoa	0.41	unclassified_Metazoa	0.41	unclassified_Metazoa	0.41	unclassified_Metazoa	0.41	unclassified_Metazoa_sp	0.41	0	0	0	0	0	4	0	0	0	0	0	0	0	0	0	0	0	0	0	0	0	0	0	0	0	0	0	0	0	0	0	0	0	0
43800e850558e0843b581f79514ef262c843233e	#N/A	Metazoa	0.89	unclassified_Metazoa	0.41	unclassified_Metazoa	0.41	unclassified_Metazoa	0.41	unclassified_Metazoa	0.41	unclassified_Metazoa	0.41	unclassified_Metazoa_sp	0.41	0	0	0	0	0	0	0	1	0	0	3	0	0	0	0	0	0	0	0	0	0	0	0	0	0	0	0	0	0	0	0	0	0	0
13b427cb233589ea74abaece5259ba8ef89c010b	#N/A	Metazoa	0.97	unclassified_Metazoa	0.79	unclassified_Metazoa	0.79	unclassified_Metazoa	0.62	unclassified_Metazoa	0.51	unclassified_Metazoa	0.41	unclassified_Metazoa_sp	0.38	0	0	0	1	0	0	0	0	0	0	0	0	0	0	0	0	0	0	0	0	0	0	0	0	0	0	0	0	0	0	0	0	0	0
09945b66f8b0df8dca2a369ccb851aa0c376e247	#N/A	Metazoa	0.93	unclassified_Metazoa	0.73	unclassified_Metazoa	0.69	unclassified_Metazoa	0.64	unclassified_Metazoa	0.44	unclassified_Metazoa	0.41	unclassified_Metazoa_sp	0.35	0	0	0	0	0	0	0	0	0	0	0	0	0	0	0	0	0	0	0	0	0	0	0	0	0	0	0	0	0	1	0	0	0	0
0875d94e24c813677471cdd1d8b9e77afb75f370	#N/A	Metazoa	0.84	unclassified_Metazoa	0.46	unclassified_Metazoa	0.42	unclassified_Metazoa	0.4	unclassified_Metazoa	0.4	unclassified_Metazoa	0.4	unclassified_Metazoa_sp	0.4	0	0	0	0	0	0	0	0	0	0	0	0	0	0	0	0	0	1	0	0	0	0	0	0	0	0	0	0	0	0	0	0	0	0
4acdd8e1e990a85d84c988dd0c0858cc060d7690	#N/A	Metazoa	0.88	unclassified_Metazoa	0.4	unclassified_Metazoa	0.4	unclassified_Metazoa	0.4	unclassified_Metazoa	0.4	unclassified_Metazoa	0.4	unclassified_Metazoa_sp	0.4	0	0	0	0	0	0	0	1	0	0	0	0	0	0	0	0	0	0	0	0	0	0	0	0	0	0	0	0	0	0	0	0	0	0
594028df6a58e4353b38d67238760a50add3f561	#N/A	Metazoa	0.86	unclassified_Metazoa	0.64	unclassified_Metazoa	0.64	unclassified_Metazoa	0.61	unclassified_Metazoa	0.58	unclassified_Metazoa	0.4	unclassified_Metazoa_sp	0.4	0	0	0	0	0	0	0	0	0	0	0	1	0	0	0	0	0	0	0	0	0	0	0	0	0	0	0	0	0	0	0	0	0	0
75b9715f71a5fcea0ffe718ca29e9460ece9a9a4	#N/A	Metazoa	0.84	unclassified_Metazoa	0.4	unclassified_Metazoa	0.4	unclassified_Metazoa	0.4	unclassified_Metazoa	0.4	unclassified_Metazoa	0.4	unclassified_Metazoa_sp	0.4	0	0	0	0	0	0	0	0	0	0	0	0	0	0	0	0	0	0	0	0	0	0	0	0	0	0	0	0	0	0	0	0	0	0
9ebeca21ecdd4a7112658ea56556b26f8b7ac540	#N/A	Metazoa	0.8	unclassified_Metazoa	0.42	unclassified_Metazoa	0.42	unclassified_Metazoa	0.4	unclassified_Metazoa	0.4	unclassified_Metazoa	0.4	unclassified_Metazoa_sp	0.4	0	0	0	0	0	0	0	0	0	0	0	0	0	0	0	0	0	0	0	0	0	0	0	0	0	0	0	0	0	0	0	0	0	0
c89ab8824a351486009725bfb2ed41a71527bf59	#N/A	Metazoa	0.86	unclassified_Metazoa	0.4	unclassified_Metazoa	0.4	unclassified_Metazoa	0.4	unclassified_Metazoa	0.4	unclassified_Metazoa	0.4	unclassified_Metazoa_sp	0.4	0	0	0	0	0	0	0	0	0	0	0	0	0	0	0	0	0	0	0	0	0	1	0	0	0	0	0	0	0	0	0	0	0	0
0bbc9f671397c37e0a5a240b575ea15afa0f4275	#N/A	Metazoa	0.82	unclassified_Metazoa	0.39	unclassified_Metazoa	0.39	unclassified_Metazoa	0.39	unclassified_Metazoa	0.39	unclassified_Metazoa	0.39	unclassified_Metazoa_sp	0.39	0	0	0	0	0	0	0	0	0	0	0	1	0	0	0	0	0	0	0	0	0	0	0	0	0	0	0	0	0	0	0	0	0	0
60584482f6f4c415496c4d70af0afd17c750157d	#N/A	Metazoa	0.85	unclassified_Metazoa	0.39	unclassified_Metazoa	0.39	unclassified_Metazoa	0.39	unclassified_Metazoa	0.39	unclassified_Metazoa	0.39	unclassified_Metazoa_sp	0.39	0	0	0	0	0	0	0	0	0	0	0	0	0	0	0	0	0	0	0	0	0	0	0	0	0	0	0	0	0	0	0	0	0	0
6e7d3eceefa2b4632a111cfddccd9f1b7e88d8dc	#N/A	Metazoa	0.8	unclassified_Metazoa	0.39	unclassified_Metazoa	0.39	unclassified_Metazoa	0.39	unclassified_Metazoa	0.39	unclassified_Metazoa	0.39	unclassified_Metazoa_sp	0.39	0	0	0	0	0	0	0	1	0	0	0	0	0	0	0	0	0	0	0	0	0	0	0	0	0	0	0	0	0	0	0	0	0	0
98fce1a3c270979691e5e489d43ae5957ffcf0fa	#N/A	Metazoa	0.8	unclassified_Metazoa	0.55	unclassified_Metazoa	0.39	unclassified_Metazoa	0.39	unclassified_Metazoa	0.39	unclassified_Metazoa	0.39	unclassified_Metazoa_sp	0.39	0	0	0	0	0	0	0	0	0	0	0	0	0	0	0	0	0	0	0	0	0	0	0	0	0	0	0	0	0	0	0	0	0	0
aeb4f6dba6e16fd2cdddbd34f42c2fd1ed42d095	#N/A	Metazoa	0.8	unclassified_Metazoa	0.6	unclassified_Metazoa	0.4	unclassified_Metazoa	0.39	unclassified_Metazoa	0.39	unclassified_Metazoa	0.39	unclassified_Metazoa_sp	0.39	0	0	0	0	0	0	0	0	0	0	0	0	0	0	0	0	0	0	0	0	0	0	0	0	0	0	0	0	0	0	0	0	0	0
becbc0e0e4eecd055ba689061e2a893cded090bd	#N/A	Metazoa	0.84	unclassified_Metazoa	0.39	unclassified_Metazoa	0.39	unclassified_Metazoa	0.39	unclassified_Metazoa	0.39	unclassified_Metazoa	0.39	unclassified_Metazoa_sp	0.39	0	0	0	0	0	0	0	0	0	0	0	0	0	0	0	0	0	0	0	0	0	0	0	0	0	0	0	0	0	0	0	0	0	0
1e440771e0f2ee97a9133a08807b3ba6fd7cc931	#N/A	Metazoa	0.8	unclassified_Metazoa	0.38	unclassified_Metazoa	0.38	unclassified_Metazoa	0.38	unclassified_Metazoa	0.38	unclassified_Metazoa	0.38	unclassified_Metazoa_sp	0.38	0	0	0	0	0	0	0	0	0	0	0	0	0	0	0	0	0	0	0	0	0	0	0	0	0	0	0	0	0	0	0	0	0	0
2a20c899e19bee2cbaa452d50325f74b8890693d	#N/A	Metazoa	0.83	unclassified_Metazoa	0.38	unclassified_Metazoa	0.38	unclassified_Metazoa	0.38	unclassified_Metazoa	0.38	unclassified_Metazoa	0.38	unclassified_Metazoa_sp	0.38	0	0	0	0	0	0	0	0	0	0	0	0	0	0	0	0	0	0	0	0	0	0	0	0	0	0	0	0	0	0	0	0	0	0
4a3e6c4decff8191ed873cc782be8bc892c3a9af	#N/A	Metazoa	1	unclassified_Metazoa	0.58	unclassified_Metazoa	0.52	unclassified_Metazoa	0.5	unclassified_Metazoa	0.45	unclassified_Metazoa	0.38	unclassified_Metazoa_sp	0.38	0	0	0	0	0	0	0	0	0	0	0	0	0	0	0	0	0	0	0	0	0	0	0	0	0	0	0	0	0	1	0	0	0	0
5960e26ee9779a2b58b60230e941c88f035647e9	#N/A	Metazoa	0.8	unclassified_Metazoa	0.38	unclassified_Metazoa	0.38	unclassified_Metazoa	0.38	unclassified_Metazoa	0.38	unclassified_Metazoa	0.38	unclassified_Metazoa_sp	0.38	0	0	0	0	0	0	0	0	0	0	0	0	0	0	0	0	0	0	0	0	0	0	0	0	0	0	0	0	0	0	0	0	0	0
79d08fce0181250e61ed9b6a44b5265c04821f1b	#N/A	Metazoa	0.8	unclassified_Metazoa	0.53	unclassified_Metazoa	0.53	unclassified_Metazoa	0.52	unclassified_Metazoa	0.45	unclassified_Metazoa	0.38	unclassified_Metazoa_sp	0.38	0	0	0	0	0	0	0	0	0	0	0	0	0	0	0	0	0	0	0	0	0	0	0	0	0	0	0	0	0	0	0	0	0	0
b68926a5dc9ddb5982680bc0a0e78e4b4a71b85b	#N/A	Metazoa	0.81	unclassified_Metazoa	0.42	unclassified_Metazoa	0.38	unclassified_Metazoa	0.38	unclassified_Metazoa	0.38	unclassified_Metazoa	0.38	unclassified_Metazoa_sp	0.38	0	1	0	0	0	0	0	0	0	0	0	0	0	0	0	0	0	0	0	0	0	0	0	0	0	0	0	0	0	0	0	0	0	0
ce22689b2774c00f86299e8d985751248c498e32	#N/A	Metazoa	0.86	unclassified_Metazoa	0.38	unclassified_Metazoa	0.38	unclassified_Metazoa	0.38	unclassified_Metazoa	0.38	unclassified_Metazoa	0.38	unclassified_Metazoa_sp	0.38	0	0	0	0	0	0	0	0	0	0	0	0	0	0	0	0	0	0	0	0	0	0	0	0	0	0	0	0	0	0	0	0	0	0
e86bacbb0bb88a4f531f1db61eb6a9db3855ca61	#N/A	Metazoa	0.89	unclassified_Metazoa	0.38	unclassified_Metazoa	0.38	unclassified_Metazoa	0.38	unclassified_Metazoa	0.38	unclassified_Metazoa	0.38	unclassified_Metazoa_sp	0.38	0	0	0	0	0	0	0	0	0	0	0	0	0	0	0	0	0	0	0	0	0	0	0	0	0	0	0	0	0	0	0	0	0	0
ec715c235bb9d402347d27a88ac1a8eab775ce72	#N/A	Metazoa	0.99	unclassified_Metazoa	0.72	unclassified_Metazoa	0.72	unclassified_Metazoa	0.62	unclassified_Metazoa	0.4	unclassified_Metazoa	0.38	unclassified_Metazoa_sp	0.38	0	0	0	0	0	0	0	0	1	0	0	0	0	0	0	0	0	0	0	0	0	0	0	0	0	0	0	0	0	0	0	0	0	0
05231b92b05a13786eb8aea294f3b421acb5c40a	#N/A	Metazoa	0.81	unclassified_Metazoa	0.54	unclassified_Metazoa	0.38	unclassified_Metazoa	0.38	unclassified_Metazoa	0.38	unclassified_Metazoa	0.38	unclassified_Metazoa_sp	0.38	0	0	0	0	0	0	0	0	0	0	0	0	0	0	0	0	0	0	0	0	0	0	0	0	0	0	0	0	0	0	0	0	0	0
956c36490f351633be0968c3c3b7973dd744fb83	#N/A	Metazoa	0.87	unclassified_Metazoa	0.38	unclassified_Metazoa	0.38	unclassified_Metazoa	0.38	unclassified_Metazoa	0.38	unclassified_Metazoa	0.38	unclassified_Metazoa_sp	0.38	0	0	0	0	0	0	0	0	0	1	0	0	0	0	0	0	0	0	0	0	0	0	0	0	0	0	0	0	0	0	1	0	0	0
22329da01741925d451c977bd3dae2c42e67699b	#N/A	Metazoa	1	unclassified_Metazoa	0.47	unclassified_Metazoa	0.45	unclassified_Metazoa	0.42	unclassified_Metazoa	0.42	unclassified_Metazoa	0.38	unclassified_Metazoa_sp	0.37	0	0	0	1	0	0	0	0	0	0	0	0	0	0	0	0	0	0	0	0	0	0	0	0	0	0	0	0	0	0	0	0	0	0
f1d6abf99c897deeef4db6edea3c336b9bcd7614	#N/A	Metazoa	0.97	unclassified_Metazoa	0.63	unclassified_Metazoa	0.63	unclassified_Metazoa	0.58	unclassified_Metazoa	0.55	unclassified_Metazoa	0.38	unclassified_Metazoa_sp	0.23	0	0	0	0	0	0	0	0	0	0	0	0	0	0	0	0	0	0	0	0	0	0	0	0	0	0	0	0	0	1	0	0	0	0
4bd11f69829c4e21abc366b4cd839485212a471d	#N/A	Metazoa	0.89	unclassified_Metazoa	0.37	unclassified_Metazoa	0.37	unclassified_Metazoa	0.37	unclassified_Metazoa	0.37	unclassified_Metazoa	0.37	unclassified_Metazoa_sp	0.37	0	0	0	0	0	0	0	0	0	0	0	0	0	0	0	0	0	0	0	0	0	0	0	0	0	0	0	0	0	0	0	0	0	0
4ed6aba3405e31e63d95ac62ac126f5c04db25f4	#N/A	Metazoa	0.91	unclassified_Metazoa	0.37	unclassified_Metazoa	0.37	unclassified_Metazoa	0.37	unclassified_Metazoa	0.37	unclassified_Metazoa	0.37	unclassified_Metazoa_sp	0.37	0	0	0	0	0	0	1	0	0	0	0	0	0	0	0	0	0	0	0	0	0	0	0	0	0	0	0	0	0	0	0	0	0	0
6991c6268f0dd31996f31e0cec677fabafb3dead	#N/A	Metazoa	0.87	unclassified_Metazoa	0.38	unclassified_Metazoa	0.38	unclassified_Metazoa	0.37	unclassified_Metazoa	0.37	unclassified_Metazoa	0.37	unclassified_Metazoa_sp	0.37	0	0	1	0	0	0	0	0	0	0	0	0	0	0	0	0	0	0	0	0	0	0	0	0	0	0	0	0	0	0	0	0	0	0
7ca59e6fa6dd57b8fb1c52693e73ad32dd0550c5	#N/A	Metazoa	0.88	unclassified_Metazoa	0.37	unclassified_Metazoa	0.37	unclassified_Metazoa	0.37	unclassified_Metazoa	0.37	unclassified_Metazoa	0.37	unclassified_Metazoa_sp	0.37	0	0	0	0	0	0	0	0	0	0	0	0	0	0	0	0	0	0	0	0	0	0	0	0	0	0	0	0	0	0	0	0	0	0
f44952e94f3fafc986f9d46eae0c92d9ad171c00	#N/A	Metazoa	0.84	unclassified_Metazoa	0.37	unclassified_Metazoa	0.37	unclassified_Metazoa	0.37	unclassified_Metazoa	0.37	unclassified_Metazoa	0.37	unclassified_Metazoa_sp	0.37	0	0	0	0	0	0	0	0	0	0	0	0	0	0	0	0	0	0	0	0	0	0	0	0	0	0	0	0	0	0	0	0	0	0
4217a3aaa5b6340b32535209a25a7aea13f20012	#N/A	Metazoa	0.82	unclassified_Metazoa	0.37	unclassified_Metazoa	0.37	unclassified_Metazoa	0.37	unclassified_Metazoa	0.37	unclassified_Metazoa	0.37	unclassified_Metazoa_sp	0.37	0	0	0	0	0	0	0	1	1	0	0	0	0	0	0	0	0	0	0	0	0	0	0	0	0	0	0	0	0	0	0	0	0	0
e92e1d74ef05179baaedc9e894b5ccead07b971e	#N/A	Metazoa	0.9	unclassified_Metazoa	0.37	unclassified_Metazoa	0.37	unclassified_Metazoa	0.37	unclassified_Metazoa	0.37	unclassified_Metazoa	0.37	unclassified_Metazoa_sp	0.37	0	0	0	0	0	0	0	0	0	0	0	0	0	0	0	0	0	0	0	0	0	0	0	0	0	0	0	0	0	0	0	0	0	0
3d3258f3a122b4ec99820b2c773a18ea3f113323	#N/A	Metazoa	0.83	unclassified_Metazoa	0.51	unclassified_Metazoa	0.37	unclassified_Metazoa	0.37	unclassified_Metazoa	0.37	unclassified_Metazoa	0.37	unclassified_Metazoa_sp	0.37	0	0	0	0	0	0	0	0	0	0	0	0	0	0	0	0	0	0	0	0	0	0	0	0	0	0	0	0	0	0	3	0	0	0
401166dadd1c523bcd5c634389e1baab883e294e	#N/A	Metazoa	0.88	unclassified_Metazoa	0.38	unclassified_Metazoa	0.38	unclassified_Metazoa	0.37	unclassified_Metazoa	0.37	unclassified_Metazoa	0.37	unclassified_Metazoa_sp	0.37	0	0	0	1	0	0	0	0	0	0	0	0	0	0	0	0	0	0	0	0	0	0	0	0	0	0	0	0	0	0	1	0	1	0
8e1dcee30c9c39a56bbf2532e3274f3db11f5e8d	#N/A	Metazoa	0.92	unclassified_Metazoa	0.42	unclassified_Metazoa	0.37	unclassified_Metazoa	0.37	unclassified_Metazoa	0.37	unclassified_Metazoa	0.37	unclassified_Metazoa_sp	0.37	0	1	0	2	0	0	0	0	0	0	0	0	0	0	0	0	0	0	0	0	0	0	0	0	0	0	0	0	0	1	1	1	0	0
36ae15d92b73f9b05fae689fbfc09f40150ceba2	#N/A	Metazoa	0.99	unclassified_Metazoa	0.71	unclassified_Metazoa	0.71	unclassified_Metazoa	0.54	unclassified_Metazoa	0.41	unclassified_Metazoa	0.37	unclassified_Metazoa_sp	0.24	0	0	0	0	0	0	0	0	0	0	0	0	0	1	0	0	0	0	0	0	0	0	0	0	0	0	0	0	0	0	0	0	0	0
af1e50ac03f3a877c34f0dad86ed63a0ae312f88	#N/A	Metazoa	0.99	unclassified_Metazoa	0.53	unclassified_Metazoa	0.53	unclassified_Metazoa	0.37	unclassified_Metazoa	0.37	unclassified_Metazoa	0.37	unclassified_Metazoa_sp	0.09	0	0	0	0	0	0	0	0	0	0	0	0	0	0	0	1	0	0	0	0	0	0	0	0	0	0	0	0	0	0	0	0	0	0
13e5127a9a3f661327ec94eb29be036047c00015	#N/A	Metazoa	0.84	unclassified_Metazoa	0.36	unclassified_Metazoa	0.36	unclassified_Metazoa	0.36	unclassified_Metazoa	0.36	unclassified_Metazoa	0.36	unclassified_Metazoa_sp	0.36	0	0	0	0	0	0	0	0	0	0	0	0	0	0	0	0	0	0	0	0	0	0	0	0	0	0	0	0	0	0	0	0	0	0
2ec4d775fef928b729d0e343b93b970401558236	#N/A	Metazoa	0.8	unclassified_Metazoa	0.36	unclassified_Metazoa	0.36	unclassified_Metazoa	0.36	unclassified_Metazoa	0.36	unclassified_Metazoa	0.36	unclassified_Metazoa_sp	0.36	0	0	0	0	0	0	0	0	0	0	0	0	0	0	0	0	0	0	0	0	0	0	0	0	0	0	0	0	0	0	0	0	0	0
74ef46a35dce565df8008b828244c3b56853dab2	#N/A	Metazoa	0.86	unclassified_Metazoa	0.37	unclassified_Metazoa	0.36	unclassified_Metazoa	0.36	unclassified_Metazoa	0.36	unclassified_Metazoa	0.36	unclassified_Metazoa_sp	0.36	0	0	0	0	0	0	0	0	0	0	0	0	0	0	0	0	0	0	0	0	0	0	0	0	0	0	0	0	0	0	1	0	0	0
835d3b7d36a172458c1ec742ff8be22efa23bfd3	#N/A	Metazoa	0.88	unclassified_Metazoa	0.36	unclassified_Metazoa	0.36	unclassified_Metazoa	0.36	unclassified_Metazoa	0.36	unclassified_Metazoa	0.36	unclassified_Metazoa_sp	0.36	0	0	0	0	0	0	0	0	0	0	1	0	0	0	0	0	0	0	0	0	0	0	0	0	0	0	0	0	0	0	0	0	0	0
9f01d9d684c162d623f584197a0ddd094786c17b	#N/A	Metazoa	0.84	unclassified_Metazoa	0.38	unclassified_Metazoa	0.36	unclassified_Metazoa	0.36	unclassified_Metazoa	0.36	unclassified_Metazoa	0.36	unclassified_Metazoa_sp	0.36	0	0	0	0	0	0	0	0	0	0	0	0	0	0	0	0	0	0	0	0	0	0	0	0	0	0	0	0	0	0	0	0	0	0
ea3d84775ea9096c6a54ee119b3a9d232ae528c8	#N/A	Metazoa	0.8	unclassified_Metazoa	0.36	unclassified_Metazoa	0.36	unclassified_Metazoa	0.36	unclassified_Metazoa	0.36	unclassified_Metazoa	0.36	unclassified_Metazoa_sp	0.36	0	0	0	0	0	0	0	0	0	0	0	0	0	0	0	0	0	0	0	0	0	0	0	0	1	0	0	0	0	0	0	0	0	0
30c1175937b88cc434283baf3d06a3914dee0ff5	#N/A	Metazoa	0.9	unclassified_Metazoa	0.36	unclassified_Metazoa	0.36	unclassified_Metazoa	0.36	unclassified_Metazoa	0.36	unclassified_Metazoa	0.36	unclassified_Metazoa_sp	0.36	0	0	0	0	0	0	0	0	0	0	0	0	0	0	0	0	0	0	0	0	0	0	0	0	0	0	0	0	0	0	0	0	0	0
611bdfa1ab8c42e7a318bfd68815aa65053703ce	#N/A	Metazoa	0.84	unclassified_Metazoa	0.36	unclassified_Metazoa	0.36	unclassified_Metazoa	0.36	unclassified_Metazoa	0.36	unclassified_Metazoa	0.36	unclassified_Metazoa_sp	0.36	0	0	0	0	0	0	0	0	0	0	0	0	0	0	0	0	0	0	0	0	0	0	0	0	0	0	0	0	0	0	0	0	0	0
cba93125cdc82e098d055e12439d3d946d63aaa5	#N/A	Metazoa	0.84	unclassified_Metazoa	0.36	unclassified_Metazoa	0.36	unclassified_Metazoa	0.36	unclassified_Metazoa	0.36	unclassified_Metazoa	0.36	unclassified_Metazoa_sp	0.36	0	0	0	0	0	0	0	6	7	0	1	0	0	0	0	0	0	0	0	0	0	0	0	0	0	0	0	0	0	0	0	0	0	0
1ed2eeaaac7c58f91b068ddae4290e065a4d7587	#N/A	Metazoa	0.83	unclassified_Metazoa	0.36	unclassified_Metazoa	0.36	unclassified_Metazoa	0.36	unclassified_Metazoa	0.36	unclassified_Metazoa	0.36	unclassified_Metazoa_sp	0.36	0	0	0	0	0	0	1	0	13	0	0	0	0	0	0	0	0	0	0	0	0	0	0	0	0	0	0	0	0	0	0	0	0	0
6b6678115a001b6f30e9872d8ff0530391a58040	#N/A	Metazoa	0.82	unclassified_Metazoa	0.36	unclassified_Metazoa	0.36	unclassified_Metazoa	0.36	unclassified_Metazoa	0.36	unclassified_Metazoa	0.36	unclassified_Metazoa_sp	0.36	0	0	0	0	0	0	0	0	0	0	0	0	0	0	0	0	0	1	0	0	0	0	0	0	0	0	0	0	0	0	0	0	0	0
6f5c13a4d2178c5de8291b69d366d59ce693eea7	#N/A	Metazoa	0.94	unclassified_Metazoa	0.63	unclassified_Metazoa	0.63	unclassified_Metazoa	0.57	unclassified_Metazoa	0.38	unclassified_Metazoa	0.36	unclassified_Metazoa_sp	0.17	1	0	0	0	0	0	0	0	0	0	0	0	0	0	0	0	0	0	0	0	0	0	0	0	0	0	0	0	0	0	0	0	0	0
2be6d3505cb1c322ebb50b4f359bcabde2bcfbf6	#N/A	Metazoa	0.8	unclassified_Metazoa	0.35	unclassified_Metazoa	0.35	unclassified_Metazoa	0.35	unclassified_Metazoa	0.35	unclassified_Metazoa	0.35	unclassified_Metazoa_sp	0.35	0	0	0	0	0	0	0	0	0	0	0	0	0	0	0	0	0	0	0	0	0	0	0	0	0	0	0	0	0	0	0	0	0	0
641e01e96b12ba1a3ba17a7fadbaec1b84f10862	#N/A	Metazoa	0.82	unclassified_Metazoa	0.37	unclassified_Metazoa	0.36	unclassified_Metazoa	0.35	unclassified_Metazoa	0.35	unclassified_Metazoa	0.35	unclassified_Metazoa_sp	0.35	0	0	0	1	0	0	0	0	0	0	0	0	0	0	0	0	0	0	0	0	0	0	0	0	0	0	0	0	0	0	0	0	0	0
b0ce0f4a82ca1c1e036b3164661dcc88539870d1	#N/A	Metazoa	0.99	unclassified_Metazoa	0.79	unclassified_Metazoa	0.79	unclassified_Metazoa	0.67	unclassified_Metazoa	0.57	unclassified_Metazoa	0.35	unclassified_Metazoa_sp	0.35	0	0	0	0	0	0	0	0	0	0	0	0	0	0	0	0	0	0	0	0	0	0	0	0	0	0	0	0	0	0	0	0	0	0
ed49e735ce46fd309b910a73052e91efe092e559	#N/A	Metazoa	0.83	unclassified_Metazoa	0.35	unclassified_Metazoa	0.35	unclassified_Metazoa	0.35	unclassified_Metazoa	0.35	unclassified_Metazoa	0.35	unclassified_Metazoa_sp	0.35	0	0	0	0	0	0	0	0	0	0	0	0	0	0	0	0	0	0	0	0	0	0	0	1	0	0	0	0	0	0	0	0	0	0
870b9cb53aac700e1329511403dd97ebed3bbed4	#N/A	Metazoa	0.87	unclassified_Metazoa	0.37	unclassified_Metazoa	0.35	unclassified_Metazoa	0.35	unclassified_Metazoa	0.35	unclassified_Metazoa	0.35	unclassified_Metazoa_sp	0.35	0	0	0	0	0	0	0	1	0	0	0	0	0	0	0	0	0	0	0	0	0	0	0	0	0	0	0	0	0	0	0	0	1	0
bebdf1ed10ec31a22c67d8208d30dc525ed53909	#N/A	Metazoa	0.81	unclassified_Metazoa	0.35	unclassified_Metazoa	0.35	unclassified_Metazoa	0.35	unclassified_Metazoa	0.35	unclassified_Metazoa	0.35	unclassified_Metazoa_sp	0.35	0	0	0	0	0	0	0	0	0	0	0	0	0	0	0	0	0	0	0	0	0	0	0	0	0	0	0	0	0	0	0	0	0	0
1c674110f3bcdcd26ae37000777b2416f051c644	#N/A	Metazoa	0.93	unclassified_Metazoa	0.35	unclassified_Metazoa	0.35	unclassified_Metazoa	0.35	unclassified_Metazoa	0.35	unclassified_Metazoa	0.35	unclassified_Metazoa_sp	0.35	0	3	0	0	0	0	0	0	0	0	0	0	0	0	0	0	0	0	0	0	0	0	0	0	0	0	0	0	0	0	0	0	0	0
34b08d6188359b28eb68a5b647946bc74bc1507b	#N/A	Metazoa	0.86	unclassified_Metazoa	0.71	unclassified_Metazoa	0.35	unclassified_Metazoa	0.35	unclassified_Metazoa	0.35	unclassified_Metazoa	0.35	unclassified_Metazoa_sp	0.33	0	0	0	0	0	0	0	0	0	0	0	0	0	0	0	0	1	0	0	0	0	0	0	0	0	0	0	0	0	0	0	0	0	0
f5aa8d7c400fc6b4c7a85a2e980cbca71b64b06a	#N/A	Metazoa	0.94	unclassified_Metazoa	0.56	unclassified_Metazoa	0.56	unclassified_Metazoa	0.53	unclassified_Metazoa	0.35	unclassified_Metazoa	0.35	unclassified_Metazoa_sp	0.32	0	0	0	0	0	0	0	0	0	0	0	0	0	0	0	0	0	0	0	0	0	0	0	0	0	0	0	0	0	0	0	0	0	0
18597c1c23f3804f5274c9d01ee1938f3f0fb994	#N/A	Metazoa	0.85	unclassified_Metazoa	0.35	unclassified_Metazoa	0.35	unclassified_Metazoa	0.34	unclassified_Metazoa	0.34	unclassified_Metazoa	0.34	unclassified_Metazoa_sp	0.34	0	0	0	0	0	0	0	0	0	0	0	0	0	0	0	0	0	0	0	0	0	0	0	0	0	0	0	0	0	0	1	0	0	0
3cf0017ada79c6c8946416beabfc2c5fdb9af994	#N/A	Metazoa	0.82	unclassified_Metazoa	0.35	unclassified_Metazoa	0.34	unclassified_Metazoa	0.34	unclassified_Metazoa	0.34	unclassified_Metazoa	0.34	unclassified_Metazoa_sp	0.34	0	0	0	0	0	0	0	0	0	0	0	0	0	0	0	0	0	0	0	0	0	0	0	0	0	0	0	0	0	0	0	0	0	0
5bea2b93ea2603e65d8e19261f3ec09498e268ba	#N/A	Metazoa	0.85	unclassified_Metazoa	0.41	unclassified_Metazoa	0.4	unclassified_Metazoa	0.34	unclassified_Metazoa	0.34	unclassified_Metazoa	0.34	unclassified_Metazoa_sp	0.34	0	0	0	0	0	0	0	0	0	0	0	0	0	0	0	0	0	0	0	0	0	0	0	0	0	0	0	0	0	0	0	0	0	0
89ea28710ffcc3754f56f44e9aa2b7cc3ebfe3b2	#N/A	Metazoa	0.9	unclassified_Metazoa	0.55	unclassified_Metazoa	0.34	unclassified_Metazoa	0.34	unclassified_Metazoa	0.34	unclassified_Metazoa	0.34	unclassified_Metazoa_sp	0.34	0	0	0	0	0	0	0	0	1	0	0	0	0	0	0	0	0	0	0	0	0	0	0	0	0	0	0	0	0	0	0	0	0	0
ae932a3dd464471b9514dfd482c7acf4267b9908	#N/A	Metazoa	0.81	unclassified_Metazoa	0.34	unclassified_Metazoa	0.34	unclassified_Metazoa	0.34	unclassified_Metazoa	0.34	unclassified_Metazoa	0.34	unclassified_Metazoa_sp	0.34	0	0	0	0	0	0	0	0	1	0	0	0	0	0	0	2	0	0	0	0	0	0	0	0	0	0	0	0	0	0	0	0	0	0
2d7f6d97f7ddd7eee022db89b710d9f052428521	#N/A	Metazoa	0.8	unclassified_Metazoa	0.36	unclassified_Metazoa	0.35	unclassified_Metazoa	0.34	unclassified_Metazoa	0.34	unclassified_Metazoa	0.34	unclassified_Metazoa_sp	0.34	0	0	0	0	0	0	0	0	4	0	1	0	5	23	9	7	6	0	0	0	0	0	0	0	0	0	0	0	0	0	0	0	0	0
cda1da950e8d87783a400f6a68418061932917f0	#N/A	Metazoa	0.91	unclassified_Metazoa	0.61	unclassified_Metazoa	0.61	unclassified_Metazoa	0.55	unclassified_Metazoa	0.49	unclassified_Metazoa	0.34	unclassified_Metazoa_sp	0.17	1	0	0	0	0	0	0	0	0	0	0	0	0	0	0	0	0	0	0	0	0	0	0	0	0	0	0	0	0	0	0	0	0	0
261253393ecb878e477e47b131a2373d4dd0b5e4	#N/A	Metazoa	0.81	unclassified_Metazoa	0.33	unclassified_Metazoa	0.33	unclassified_Metazoa	0.33	unclassified_Metazoa	0.33	unclassified_Metazoa	0.33	unclassified_Metazoa_sp	0.33	0	0	0	0	0	0	0	0	0	0	1	0	0	0	0	0	0	0	0	0	0	0	0	0	0	0	0	0	0	0	0	0	0	0
73d7a8c58ee37df8cd106aa9e37d181da7ae9200	#N/A	Metazoa	0.99	unclassified_Metazoa	0.6	unclassified_Metazoa	0.6	unclassified_Metazoa	0.6	unclassified_Metazoa	0.33	unclassified_Metazoa	0.33	unclassified_Metazoa_sp	0.33	0	0	0	0	0	0	0	0	0	1	0	0	0	0	0	0	0	0	0	0	0	0	0	0	0	0	0	0	0	0	0	0	0	0
fac27402517e39ac1258cc6b896324f8d1771e90	#N/A	Metazoa	0.85	unclassified_Metazoa	0.33	unclassified_Metazoa	0.33	unclassified_Metazoa	0.33	unclassified_Metazoa	0.33	unclassified_Metazoa	0.33	unclassified_Metazoa_sp	0.33	0	0	0	0	0	0	0	0	0	0	0	0	0	0	0	0	0	0	0	0	0	0	0	0	1	0	0	0	0	0	0	0	0	0
f453720dbbd31a861adee4dc8d1ea7bf13c71a01	#N/A	Metazoa	0.8	unclassified_Metazoa	0.34	unclassified_Metazoa	0.34	unclassified_Metazoa	0.33	unclassified_Metazoa	0.33	unclassified_Metazoa	0.33	unclassified_Metazoa_sp	0.33	0	0	0	0	0	0	0	0	0	0	0	0	0	0	0	0	0	0	0	0	0	0	0	0	0	0	0	0	0	0	0	0	0	0
ad502f457bf76bd34e5e7f490d33aae3fba0e428	#N/A	Metazoa	0.89	unclassified_Metazoa	0.34	unclassified_Metazoa	0.34	unclassified_Metazoa	0.33	unclassified_Metazoa	0.33	unclassified_Metazoa	0.33	unclassified_Metazoa_sp	0.33	0	0	0	0	0	0	0	0	0	0	0	0	0	0	0	0	0	0	0	1	1	0	0	0	0	0	0	0	0	0	0	0	0	0
b129ef4ed64dbf8b595f36730786869a4dc46a16	#N/A	Metazoa	0.98	unclassified_Metazoa	0.64	unclassified_Metazoa	0.64	unclassified_Metazoa	0.49	unclassified_Metazoa	0.33	unclassified_Metazoa	0.33	unclassified_Metazoa_sp	0.3	0	0	0	0	0	0	0	0	0	0	0	0	0	0	0	0	1	0	0	0	0	0	0	0	0	0	0	0	0	0	0	0	0	0
f02f4fd6d445e949a16db2d90b4842d343d29bd5	#N/A	Metazoa	0.95	unclassified_Metazoa	0.79	unclassified_Metazoa	0.79	unclassified_Metazoa	0.65	unclassified_Metazoa	0.45	unclassified_Metazoa	0.33	unclassified_Metazoa_sp	0.26	0	0	0	0	0	0	0	0	0	0	0	0	0	0	0	0	0	0	0	0	0	0	0	0	0	0	0	0	0	0	0	0	0	0
ee098b8f0dc95d9311fd6678d2bb1e93b033283c	#N/A	Metazoa	0.84	unclassified_Metazoa	0.58	unclassified_Metazoa	0.58	unclassified_Metazoa	0.57	unclassified_Metazoa	0.55	unclassified_Metazoa	0.33	unclassified_Metazoa_sp	0.25	0	0	0	0	0	1	0	0	0	0	0	0	0	0	0	0	0	0	0	0	0	0	0	0	0	0	0	0	0	0	0	0	0	0
006a47e1d29c9fe9e1bc5dcac970550cf5b9971f	#N/A	Metazoa	0.98	unclassified_Metazoa	0.51	unclassified_Metazoa	0.51	unclassified_Metazoa	0.48	unclassified_Metazoa	0.4	unclassified_Metazoa	0.32	unclassified_Metazoa_sp	0.32	0	0	0	0	0	0	0	0	0	0	0	0	0	0	0	0	0	0	0	0	0	0	0	0	0	0	0	0	0	0	0	0	0	0
108c70ebce6272307fc8c179fa91bc69ecb03426	#N/A	Metazoa	0.82	unclassified_Metazoa	0.32	unclassified_Metazoa	0.32	unclassified_Metazoa	0.32	unclassified_Metazoa	0.32	unclassified_Metazoa	0.32	unclassified_Metazoa_sp	0.32	0	0	0	0	0	0	0	0	0	0	0	0	0	0	0	0	0	0	0	0	0	0	0	0	0	0	0	0	0	0	0	0	0	0
156f656360ebd90923f3023f9d2f48e190b35f42	#N/A	Metazoa	0.87	unclassified_Metazoa	0.33	unclassified_Metazoa	0.33	unclassified_Metazoa	0.32	unclassified_Metazoa	0.32	unclassified_Metazoa	0.32	unclassified_Metazoa_sp	0.32	0	0	0	0	0	0	0	0	0	0	0	0	0	0	0	0	0	0	0	0	0	0	0	0	0	0	0	0	0	0	0	0	0	0
41eef71a13e28b470cb01a2889866ebcf5cd7f50	#N/A	Metazoa	0.84	unclassified_Metazoa	0.32	unclassified_Metazoa	0.32	unclassified_Metazoa	0.32	unclassified_Metazoa	0.32	unclassified_Metazoa	0.32	unclassified_Metazoa_sp	0.32	0	0	0	0	0	0	0	0	0	0	0	0	0	0	0	0	0	0	0	0	0	0	0	0	0	0	0	0	0	0	0	0	0	0
faecdfa23fdf0331d17227d565c4bf02cd4321e6	#N/A	Metazoa	0.8	unclassified_Metazoa	0.32	unclassified_Metazoa	0.32	unclassified_Metazoa	0.32	unclassified_Metazoa	0.32	unclassified_Metazoa	0.32	unclassified_Metazoa_sp	0.32	0	0	0	0	0	0	0	0	0	0	0	0	0	0	0	0	0	0	0	0	0	0	0	0	0	0	0	0	0	0	0	0	0	0
fcd3a78e226ea08ac02c0e6cb9d16a4d87291065	#N/A	Metazoa	0.8	unclassified_Metazoa	0.36	unclassified_Metazoa	0.34	unclassified_Metazoa	0.32	unclassified_Metazoa	0.32	unclassified_Metazoa	0.32	unclassified_Metazoa_sp	0.32	0	0	0	0	0	0	0	0	0	0	0	0	0	0	0	0	0	0	0	0	0	0	0	0	0	0	0	0	0	0	0	0	0	0
76c2560e8372ccb5f2d4f52d94441d68011f5386	#N/A	Metazoa	1	unclassified_Metazoa	0.56	unclassified_Metazoa	0.56	unclassified_Metazoa	0.56	unclassified_Metazoa	0.32	unclassified_Metazoa	0.32	unclassified_Metazoa_sp	0.26	0	0	1	0	0	0	0	11	0	2	0	0	0	0	0	0	0	0	0	0	0	1	0	0	0	0	0	0	0	0	0	0	0	0
5f59e89f8366292d715f48fb0aad588bba3e62b8	#N/A	Metazoa	0.9	unclassified_Metazoa	0.34	unclassified_Metazoa	0.33	unclassified_Metazoa	0.31	unclassified_Metazoa	0.31	unclassified_Metazoa	0.31	unclassified_Metazoa_sp	0.31	0	0	0	0	0	0	0	0	0	0	0	0	0	0	0	0	1	0	0	0	0	0	0	0	0	0	0	0	0	0	0	0	0	0
69c892ef0c2c562be84b0bd2edc1b0f78c98d25c	#N/A	Metazoa	0.82	unclassified_Metazoa	0.31	unclassified_Metazoa	0.31	unclassified_Metazoa	0.31	unclassified_Metazoa	0.31	unclassified_Metazoa	0.31	unclassified_Metazoa_sp	0.31	0	0	0	0	0	0	0	0	0	1	0	0	0	0	0	0	0	0	0	0	0	0	0	0	0	0	0	0	0	0	0	0	0	0
8547c857159e76de1234e16b330bc6a7ad9ad6d3	#N/A	Metazoa	0.8	unclassified_Metazoa	0.31	unclassified_Metazoa	0.31	unclassified_Metazoa	0.31	unclassified_Metazoa	0.31	unclassified_Metazoa	0.31	unclassified_Metazoa_sp	0.31	0	0	0	0	0	0	0	0	0	0	0	0	0	0	0	0	0	0	0	0	0	0	0	0	0	0	0	0	0	0	0	0	0	0
87243330adc81a50698864b8a15160efd60cee03	#N/A	Metazoa	0.84	unclassified_Metazoa	0.31	unclassified_Metazoa	0.31	unclassified_Metazoa	0.31	unclassified_Metazoa	0.31	unclassified_Metazoa	0.31	unclassified_Metazoa_sp	0.31	0	0	0	0	0	0	0	0	0	0	0	0	0	0	0	0	0	1	0	0	0	0	0	0	0	0	0	0	0	0	0	0	0	0
96aca36664b88488045f2860a9b7ebdf89f50c92	#N/A	Metazoa	0.81	unclassified_Metazoa	0.31	unclassified_Metazoa	0.31	unclassified_Metazoa	0.31	unclassified_Metazoa	0.31	unclassified_Metazoa	0.31	unclassified_Metazoa_sp	0.31	0	0	0	0	0	1	0	0	0	0	0	0	0	0	0	0	0	0	0	0	0	0	0	0	0	0	0	0	0	0	0	0	0	0
afc604d1e126806a7e1aba1cd6e6364c169af769	#N/A	Metazoa	0.82	unclassified_Metazoa	0.31	unclassified_Metazoa	0.31	unclassified_Metazoa	0.31	unclassified_Metazoa	0.31	unclassified_Metazoa	0.31	unclassified_Metazoa_sp	0.31	0	0	0	0	0	0	0	0	0	0	0	0	0	0	0	0	0	0	0	0	0	0	0	0	0	0	0	0	0	0	0	0	0	0
c9ee8e72ba6d37d8c1a7f78df3239984004ddb0a	#N/A	Metazoa	0.8	unclassified_Metazoa	0.31	unclassified_Metazoa	0.31	unclassified_Metazoa	0.31	unclassified_Metazoa	0.31	unclassified_Metazoa	0.31	unclassified_Metazoa_sp	0.31	0	1	0	0	0	0	0	0	0	0	0	0	0	0	0	0	0	0	0	0	0	0	0	0	0	0	0	0	0	0	0	0	0	0
eaee25e276dece1c7cd429501128b1be64cedcb4	#N/A	Metazoa	0.82	unclassified_Metazoa	0.32	unclassified_Metazoa	0.32	unclassified_Metazoa	0.31	unclassified_Metazoa	0.31	unclassified_Metazoa	0.31	unclassified_Metazoa_sp	0.31	0	0	0	0	0	0	0	0	0	0	0	0	0	0	0	0	0	0	0	0	0	0	0	0	0	0	0	0	0	0	0	0	0	0
a443740b913b3f426d6977b3a4b3d8163cf234b9	#N/A	Metazoa	0.85	unclassified_Metazoa	0.31	unclassified_Metazoa	0.31	unclassified_Metazoa	0.31	unclassified_Metazoa	0.31	unclassified_Metazoa	0.31	unclassified_Metazoa_sp	0.31	0	0	0	0	0	0	0	0	0	0	0	0	0	0	3	0	0	0	0	0	0	0	0	0	0	0	0	0	0	0	0	0	0	0
3d698744c1f03006e9066e5deb512956629c7813	#N/A	Metazoa	0.82	unclassified_Metazoa	0.31	unclassified_Metazoa	0.31	unclassified_Metazoa	0.31	unclassified_Metazoa	0.31	unclassified_Metazoa	0.31	unclassified_Metazoa_sp	0.31	0	0	0	0	0	0	0	0	0	0	0	0	0	0	0	0	0	0	0	0	0	0	0	0	0	0	0	0	0	0	1	1	0	0
4eb4896ff0b277eb2b0201808e69556bd1f2a800	#N/A	Metazoa	0.81	unclassified_Metazoa	0.44	unclassified_Metazoa	0.44	unclassified_Metazoa	0.42	unclassified_Metazoa	0.37	unclassified_Metazoa	0.31	unclassified_Metazoa_sp	0.17	0	0	0	0	0	0	0	0	0	0	0	0	0	0	0	0	0	0	0	0	0	0	0	0	0	0	0	0	0	0	0	0	0	0
c556b3a04f7330a86e50d3ceb67073861b7192cb	#N/A	Metazoa	0.99	unclassified_Metazoa	0.5	unclassified_Metazoa	0.5	unclassified_Metazoa	0.5	unclassified_Metazoa	0.39	unclassified_Metazoa	0.31	unclassified_Metazoa_sp	0.12	0	0	0	0	0	2	0	0	0	0	0	0	0	0	0	0	1	0	0	0	0	0	0	0	0	0	0	0	0	0	0	0	0	0
068a651aaa9ae0f4ab2f0bedeee519660c36ef38	#N/A	Metazoa	0.83	unclassified_Metazoa	0.3	unclassified_Metazoa	0.3	unclassified_Metazoa	0.3	unclassified_Metazoa	0.3	unclassified_Metazoa	0.3	unclassified_Metazoa_sp	0.3	0	0	0	0	0	0	0	0	0	0	0	0	1	0	0	0	0	0	0	0	0	0	0	0	0	0	0	0	0	0	0	0	0	0
6a5e61a50790dc6c236b456068ea0849db2f0e7d	#N/A	Metazoa	0.91	unclassified_Metazoa	0.3	unclassified_Metazoa	0.3	unclassified_Metazoa	0.3	unclassified_Metazoa	0.3	unclassified_Metazoa	0.3	unclassified_Metazoa_sp	0.3	0	0	0	0	0	0	0	0	0	0	0	0	0	0	0	0	0	0	0	0	0	0	0	0	0	0	0	0	0	0	0	0	0	0
d644d80237bb6054565a273f1be0805f9a04ac9e	#N/A	Metazoa	0.81	unclassified_Metazoa	0.38	unclassified_Metazoa	0.34	unclassified_Metazoa	0.3	unclassified_Metazoa	0.3	unclassified_Metazoa	0.3	unclassified_Metazoa_sp	0.3	0	0	0	0	0	1	0	0	0	0	0	0	0	0	0	0	0	0	0	0	0	0	0	0	0	0	0	0	0	0	0	0	0	0
ed70c2dddad2e639acc329bca4a9205a6d1533af	#N/A	Metazoa	0.86	unclassified_Metazoa	0.3	unclassified_Metazoa	0.3	unclassified_Metazoa	0.3	unclassified_Metazoa	0.3	unclassified_Metazoa	0.3	unclassified_Metazoa_sp	0.3	0	0	0	0	0	0	0	0	0	0	0	0	0	0	0	0	0	0	0	0	0	0	0	0	0	0	0	0	0	0	0	0	0	0
ee1aefede352eaeb7f2bf2ec1adbddb9e40dbb53	#N/A	Metazoa	0.81	unclassified_Metazoa	0.3	unclassified_Metazoa	0.3	unclassified_Metazoa	0.3	unclassified_Metazoa	0.3	unclassified_Metazoa	0.3	unclassified_Metazoa_sp	0.3	0	0	0	0	0	0	0	0	0	0	0	0	0	0	0	0	0	0	0	0	0	0	0	0	0	0	0	0	0	0	1	0	0	0
f055088a8fa21db5e3d4bb4b65ea66c7e0e0d78c	#N/A	Metazoa	0.92	unclassified_Metazoa	0.31	unclassified_Metazoa	0.31	unclassified_Metazoa	0.3	unclassified_Metazoa	0.3	unclassified_Metazoa	0.3	unclassified_Metazoa_sp	0.3	0	0	0	0	0	0	0	0	0	0	0	0	0	0	0	0	0	0	0	0	0	0	0	0	0	0	0	0	0	0	0	0	0	0
fa679b307f30fdc0cf780ce3f5eb5565216ee173	#N/A	Metazoa	0.8	unclassified_Metazoa	0.3	unclassified_Metazoa	0.3	unclassified_Metazoa	0.3	unclassified_Metazoa	0.3	unclassified_Metazoa	0.3	unclassified_Metazoa_sp	0.3	0	0	0	0	0	0	0	0	0	0	0	0	0	0	0	0	0	0	0	0	0	0	0	0	0	0	0	0	0	0	0	0	0	0
47a76706f60acf73af85654412f2ac394023649c	#N/A	Metazoa	0.83	unclassified_Metazoa	0.3	unclassified_Metazoa	0.3	unclassified_Metazoa	0.3	unclassified_Metazoa	0.3	unclassified_Metazoa	0.3	unclassified_Metazoa_sp	0.3	0	0	0	0	0	0	0	0	0	0	0	0	0	0	0	0	0	0	0	0	0	0	0	0	0	1	2	0	0	0	0	0	0	0
74c100714d815bf061cb11491956f0f2c549397b	#N/A	Metazoa	0.89	unclassified_Metazoa	0.3	unclassified_Metazoa	0.3	unclassified_Metazoa	0.3	unclassified_Metazoa	0.3	unclassified_Metazoa	0.3	unclassified_Metazoa_sp	0.3	0	0	0	0	0	0	0	0	0	0	0	0	0	0	0	0	0	0	0	0	0	0	0	0	0	0	0	0	0	0	1	0	0	0
83d5201bb2519eab20b76bdf73a6e2ca01c0083f	#N/A	Metazoa	0.83	unclassified_Metazoa	0.3	unclassified_Metazoa	0.3	unclassified_Metazoa	0.3	unclassified_Metazoa	0.3	unclassified_Metazoa	0.3	unclassified_Metazoa_sp	0.3	0	0	2	0	0	0	0	0	0	3	0	0	0	0	0	0	0	0	0	0	0	0	0	0	0	0	0	0	0	0	0	0	0	0
39e700e2f6133cefa22472697f719d54ed8e6261	#N/A	Metazoa	0.84	unclassified_Metazoa	0.3	unclassified_Metazoa	0.3	unclassified_Metazoa	0.3	unclassified_Metazoa	0.3	unclassified_Metazoa	0.3	unclassified_Metazoa_sp	0.3	0	0	0	0	0	0	0	0	0	0	0	0	0	0	0	0	0	0	0	0	0	0	0	0	0	0	0	0	0	0	0	0	0	0
46e8fde3a5303178fa7da21d23b7beffb3a24c35	#N/A	Metazoa	0.84	unclassified_Metazoa	0.31	unclassified_Metazoa	0.31	unclassified_Metazoa	0.3	unclassified_Metazoa	0.3	unclassified_Metazoa	0.3	unclassified_Metazoa_sp	0.3	0	0	0	0	0	0	0	0	0	0	0	0	0	0	0	0	0	0	0	0	0	0	0	0	0	0	0	0	0	0	0	0	0	0
6a3a48c47e744e0edf241d2935eecab12a771984	#N/A	Metazoa	0.8	unclassified_Metazoa	0.38	unclassified_Metazoa	0.34	unclassified_Metazoa	0.3	unclassified_Metazoa	0.3	unclassified_Metazoa	0.3	unclassified_Metazoa_sp	0.3	0	0	0	0	0	0	0	0	0	0	0	0	0	0	0	0	0	0	0	0	0	0	0	0	0	0	0	0	0	0	0	0	0	0
14146f1c226edccee52bf2d77cdb2a1de09cc997	#N/A	Metazoa	0.8	unclassified_Metazoa	0.46	unclassified_Metazoa	0.41	unclassified_Metazoa	0.3	unclassified_Metazoa	0.3	unclassified_Metazoa	0.3	unclassified_Metazoa_sp	0.25	0	0	0	0	0	0	0	0	0	0	0	0	0	0	0	0	0	0	0	0	0	0	0	0	0	0	0	0	0	0	0	0	0	0
2e1d3917429944debc35683683a3fc73c824983f	#N/A	Metazoa	0.92	unclassified_Metazoa	0.51	unclassified_Metazoa	0.51	unclassified_Metazoa	0.46	unclassified_Metazoa	0.3	unclassified_Metazoa	0.3	unclassified_Metazoa_sp	0.22	0	0	0	0	0	0	0	0	0	0	0	0	0	0	0	0	0	0	0	0	0	0	0	0	0	0	0	0	0	0	0	0	0	0
979c55ebd7f9ddb6ee9ab9a509ccaf90c52f4a1c	#N/A	Metazoa	1	unclassified_Metazoa	0.66	unclassified_Metazoa	0.58	unclassified_Metazoa	0.53	unclassified_Metazoa	0.53	unclassified_Metazoa	0.3	unclassified_Metazoa_sp	0.2	0	0	0	0	0	0	0	0	0	0	0	0	0	0	0	0	0	0	0	0	0	0	0	0	0	0	0	0	0	0	0	0	0	0
caf79e3d1126b9c800bcde2854e037df01d3da3b	#N/A	Metazoa	0.84	unclassified_Metazoa	0.34	unclassified_Metazoa	0.32	unclassified_Metazoa	0.29	unclassified_Metazoa	0.29	unclassified_Metazoa	0.29	unclassified_Metazoa_sp	0.29	0	0	0	0	0	0	0	0	0	0	0	0	0	0	0	0	0	0	0	0	0	0	0	0	0	0	0	0	0	0	0	0	0	0
d1c3433ebce057f2ad07f52a1dee8bf638745d2f	#N/A	Metazoa	0.82	unclassified_Metazoa	0.29	unclassified_Metazoa	0.29	unclassified_Metazoa	0.29	unclassified_Metazoa	0.29	unclassified_Metazoa	0.29	unclassified_Metazoa_sp	0.29	0	0	0	0	0	0	0	0	0	0	0	0	0	0	0	0	0	1	0	0	0	0	0	0	0	0	0	0	0	0	0	0	0	0
42a89a4dc580ffa8ab09b47079fefd141000b322	#N/A	Metazoa	0.81	unclassified_Metazoa	0.29	unclassified_Metazoa	0.29	unclassified_Metazoa	0.29	unclassified_Metazoa	0.29	unclassified_Metazoa	0.29	unclassified_Metazoa_sp	0.29	0	0	0	0	0	0	0	0	0	0	0	0	0	0	0	0	0	0	0	0	0	0	0	0	0	0	0	0	0	0	0	1	0	0
7096dacef57742da0cec482838de20e9c160476f	#N/A	Metazoa	0.84	unclassified_Metazoa	0.29	unclassified_Metazoa	0.29	unclassified_Metazoa	0.29	unclassified_Metazoa	0.29	unclassified_Metazoa	0.29	unclassified_Metazoa_sp	0.29	0	0	0	0	0	0	0	0	0	0	0	0	0	0	0	0	0	0	0	0	0	0	0	0	0	0	0	0	0	0	0	0	0	0
636b589d8fd799fa94577a4b57298d6d30a82176	#N/A	Metazoa	0.82	unclassified_Metazoa	0.29	unclassified_Metazoa	0.29	unclassified_Metazoa	0.29	unclassified_Metazoa	0.29	unclassified_Metazoa	0.29	unclassified_Metazoa_sp	0.29	0	0	0	0	0	0	0	0	0	0	0	0	0	0	0	0	0	0	0	0	0	0	0	0	0	0	0	0	0	0	0	0	0	0
d13a3bfda5a643d51d92e2d09e007dc7b1f7d1ac	#N/A	Metazoa	0.9	unclassified_Metazoa	0.29	unclassified_Metazoa	0.29	unclassified_Metazoa	0.29	unclassified_Metazoa	0.29	unclassified_Metazoa	0.29	unclassified_Metazoa_sp	0.29	0	0	0	0	0	0	0	0	4	0	0	0	0	0	0	0	0	0	0	0	0	0	0	0	0	0	0	0	0	0	0	0	0	0
839ef2647c7ae227e0ee07ba509adfc29de6ae3b	#N/A	Metazoa	0.86	unclassified_Metazoa	0.29	unclassified_Metazoa	0.29	unclassified_Metazoa	0.29	unclassified_Metazoa	0.29	unclassified_Metazoa	0.29	unclassified_Metazoa_sp	0.29	0	0	0	0	0	0	1	0	0	0	2	0	0	0	0	0	0	0	0	0	0	0	0	0	0	0	0	0	0	0	0	0	0	0
3d0e3a2d6688093aada11ad34232d9689ee64799	#N/A	Metazoa	0.8	unclassified_Metazoa	0.41	unclassified_Metazoa	0.3	unclassified_Metazoa	0.3	unclassified_Metazoa	0.29	unclassified_Metazoa	0.29	unclassified_Metazoa_sp	0.29	0	0	0	0	0	0	0	0	0	0	0	0	0	0	0	0	0	0	0	0	0	0	0	0	0	0	0	0	0	0	0	0	0	0
551159699a8845dcd892f0891c68c970e0f85ebb	#N/A	Metazoa	0.96	unclassified_Metazoa	0.58	unclassified_Metazoa	0.58	unclassified_Metazoa	0.55	unclassified_Metazoa	0.34	unclassified_Metazoa	0.29	unclassified_Metazoa_sp	0.28	0	0	0	0	0	0	0	0	0	0	0	0	0	1	0	0	0	0	0	0	0	0	0	0	0	0	0	0	0	0	0	0	0	0
7630466361854a56f2e13f0064343045153c1760	#N/A	Metazoa	0.96	unclassified_Metazoa	0.5	unclassified_Metazoa	0.5	unclassified_Metazoa	0.49	unclassified_Metazoa	0.32	unclassified_Metazoa	0.29	unclassified_Metazoa_sp	0.18	0	0	0	0	0	0	0	0	0	0	0	0	0	0	0	1	0	0	0	0	0	0	0	0	0	0	0	0	0	0	0	0	0	0
31134884ad1ef2082ade0c6220782a848c652b25	#N/A	Metazoa	0.85	unclassified_Metazoa	0.49	unclassified_Metazoa	0.49	unclassified_Metazoa	0.46	unclassified_Metazoa	0.3	unclassified_Metazoa	0.29	unclassified_Metazoa_sp	0.15	0	0	0	0	0	0	0	0	0	0	0	0	0	0	0	0	0	0	0	0	1	0	0	0	0	0	0	0	0	0	0	0	0	0
11cbb965745714f7895f1e849c217721b9186d62	#N/A	Metazoa	0.81	unclassified_Metazoa	0.3	unclassified_Metazoa	0.3	unclassified_Metazoa	0.28	unclassified_Metazoa	0.28	unclassified_Metazoa	0.28	unclassified_Metazoa_sp	0.28	0	0	0	0	0	0	1	0	0	0	0	0	0	0	0	0	0	0	0	0	0	0	0	0	0	0	0	0	0	0	0	0	0	0
392192b93feab1cc8d804e9cf2a1035c290b4934	#N/A	Metazoa	0.81	unclassified_Metazoa	0.3	unclassified_Metazoa	0.3	unclassified_Metazoa	0.28	unclassified_Metazoa	0.28	unclassified_Metazoa	0.28	unclassified_Metazoa_sp	0.28	0	0	0	0	0	0	0	0	0	0	0	0	0	0	0	0	0	0	0	0	0	0	0	0	0	0	1	0	0	0	0	0	0	0
3e547b743155aeee2176fb0d1cb0f81a4f907870	#N/A	Metazoa	0.9	unclassified_Metazoa	0.29	unclassified_Metazoa	0.29	unclassified_Metazoa	0.28	unclassified_Metazoa	0.28	unclassified_Metazoa	0.28	unclassified_Metazoa_sp	0.28	0	0	0	0	0	0	0	1	0	0	0	0	0	0	0	0	0	0	0	0	0	0	0	0	0	0	0	0	0	0	0	0	0	0
4465b6492ac1e4c7e2b8ac86fb81847217e86aae	#N/A	Metazoa	0.81	unclassified_Metazoa	0.3	unclassified_Metazoa	0.3	unclassified_Metazoa	0.28	unclassified_Metazoa	0.28	unclassified_Metazoa	0.28	unclassified_Metazoa_sp	0.28	0	0	0	1	0	0	0	0	0	0	0	0	0	0	0	0	0	0	0	0	0	0	0	0	0	0	0	0	0	0	0	0	0	0
45462e7ee8d585caa80a27f365dc173177737fcf	#N/A	Metazoa	0.81	unclassified_Metazoa	0.31	unclassified_Metazoa	0.31	unclassified_Metazoa	0.28	unclassified_Metazoa	0.28	unclassified_Metazoa	0.28	unclassified_Metazoa_sp	0.28	0	0	0	0	0	0	0	0	0	0	0	0	0	0	0	0	0	0	0	0	0	0	0	0	0	0	0	0	0	0	0	0	0	0
7579aefeddfabc527d7affd87f9141a79537adb6	#N/A	Metazoa	0.92	unclassified_Metazoa	0.28	unclassified_Metazoa	0.28	unclassified_Metazoa	0.28	unclassified_Metazoa	0.28	unclassified_Metazoa	0.28	unclassified_Metazoa_sp	0.28	0	0	0	0	0	0	0	0	0	0	0	0	0	0	0	0	0	0	0	0	0	0	0	0	0	0	0	0	0	0	0	0	0	0
7a19c74261a44ac35418176ab06c6e44cd6c3297	#N/A	Metazoa	1	unclassified_Metazoa	0.42	unclassified_Metazoa	0.42	unclassified_Metazoa	0.42	unclassified_Metazoa	0.28	unclassified_Metazoa	0.28	unclassified_Metazoa_sp	0.28	0	0	1	0	0	0	0	0	0	0	0	0	0	0	0	0	0	0	0	0	0	0	0	0	0	0	0	0	0	0	0	0	0	0
90e443e107b482e8ca276cd3c15cca04ac75be2f	#N/A	Metazoa	0.8	unclassified_Metazoa	0.28	unclassified_Metazoa	0.28	unclassified_Metazoa	0.28	unclassified_Metazoa	0.28	unclassified_Metazoa	0.28	unclassified_Metazoa_sp	0.28	0	0	0	0	0	0	0	0	0	0	0	0	0	0	0	0	0	1	0	0	0	0	0	0	0	0	0	0	0	0	0	0	0	0
9b4ab674bc9ff59cfa1f2b94366ffb809e0c2c4d	#N/A	Metazoa	0.81	unclassified_Metazoa	0.36	unclassified_Metazoa	0.33	unclassified_Metazoa	0.28	unclassified_Metazoa	0.28	unclassified_Metazoa	0.28	unclassified_Metazoa_sp	0.28	0	0	0	0	0	0	0	0	0	0	0	0	0	0	0	0	0	0	0	0	0	0	0	0	0	0	0	1	0	0	0	0	0	0
abaf603f719ba437b3158b10e0c6bff13009d2cd	#N/A	Metazoa	0.82	unclassified_Metazoa	0.29	unclassified_Metazoa	0.29	unclassified_Metazoa	0.28	unclassified_Metazoa	0.28	unclassified_Metazoa	0.28	unclassified_Metazoa_sp	0.28	0	0	0	0	0	0	0	0	0	0	0	0	0	0	0	0	0	0	0	0	0	0	0	0	0	0	0	0	0	1	0	0	0	0
f27900e1654a3becf015bc9d0d2aa6caba016c22	#N/A	Metazoa	0.99	unclassified_Metazoa	0.63	unclassified_Metazoa	0.63	unclassified_Metazoa	0.59	unclassified_Metazoa	0.28	unclassified_Metazoa	0.28	unclassified_Metazoa_sp	0.28	0	0	0	0	0	0	0	0	0	0	0	0	0	0	0	0	0	0	0	5	0	0	0	0	0	0	0	0	0	0	0	0	0	0
ec464459695266572d1aaf42366a88466c0d46db	#N/A	Metazoa	0.8	unclassified_Metazoa	0.55	unclassified_Metazoa	0.28	unclassified_Metazoa	0.28	unclassified_Metazoa	0.28	unclassified_Metazoa	0.28	unclassified_Metazoa_sp	0.28	0	0	0	0	0	0	0	0	0	0	0	0	0	0	0	0	0	0	0	0	0	0	0	0	0	0	0	0	0	0	0	0	0	0
07d063d0249484856f99f6ae95e088067f44d201	#N/A	Metazoa	0.86	unclassified_Metazoa	0.27	unclassified_Metazoa	0.27	unclassified_Metazoa	0.27	unclassified_Metazoa	0.27	unclassified_Metazoa	0.27	unclassified_Metazoa_sp	0.27	0	0	0	0	0	0	0	0	0	0	0	0	0	0	0	0	0	0	0	0	0	0	0	0	0	0	1	0	0	0	0	0	0	0
15a5cafa639022df598535c60af1c60c1dce28c7	#N/A	Metazoa	1	unclassified_Metazoa	0.4	unclassified_Metazoa	0.37	unclassified_Metazoa	0.35	unclassified_Metazoa	0.35	unclassified_Metazoa	0.27	unclassified_Metazoa_sp	0.27	0	0	0	0	0	0	0	0	0	0	0	0	0	0	0	0	0	0	0	0	0	0	0	0	0	0	0	0	0	0	0	0	0	0
1c2974ef12181d6fceb096a1ef8b8a72cc2a0ab3	#N/A	Metazoa	0.93	unclassified_Metazoa	0.78	unclassified_Metazoa	0.78	unclassified_Metazoa	0.35	unclassified_Metazoa	0.27	unclassified_Metazoa	0.27	unclassified_Metazoa_sp	0.27	0	0	0	0	0	0	0	0	0	0	0	0	0	0	0	0	0	0	0	0	0	0	0	0	0	0	0	0	0	1	0	0	0	0
4c7287f34da599d02cdbc436e3f6c2aaa170ee5f	#N/A	Metazoa	0.89	unclassified_Metazoa	0.28	unclassified_Metazoa	0.27	unclassified_Metazoa	0.27	unclassified_Metazoa	0.27	unclassified_Metazoa	0.27	unclassified_Metazoa_sp	0.27	0	0	0	0	0	1	0	0	0	0	0	0	0	0	0	0	0	0	0	0	0	0	0	0	0	0	0	0	0	0	0	0	0	0
7833cd448543a1b9c64399a23a30ebb25fd3de17	#N/A	Metazoa	0.82	unclassified_Metazoa	0.34	unclassified_Metazoa	0.34	unclassified_Metazoa	0.27	unclassified_Metazoa	0.27	unclassified_Metazoa	0.27	unclassified_Metazoa_sp	0.27	0	0	0	0	0	0	0	0	0	0	0	0	0	0	0	0	0	0	0	0	0	0	0	0	0	0	0	0	0	0	0	0	0	0
99d1914b5ffa0b72799b4e01f4c7bb371298b1de	#N/A	Metazoa	0.82	unclassified_Metazoa	0.6	unclassified_Metazoa	0.27	unclassified_Metazoa	0.27	unclassified_Metazoa	0.27	unclassified_Metazoa	0.27	unclassified_Metazoa_sp	0.27	0	0	0	0	0	0	0	0	1	0	0	0	0	0	0	0	0	0	0	0	0	0	0	0	0	0	0	0	0	0	0	0	0	0
c0347fd401977c04c9ff3f9d5e39041c158b20cb	#N/A	Metazoa	0.81	unclassified_Metazoa	0.27	unclassified_Metazoa	0.27	unclassified_Metazoa	0.27	unclassified_Metazoa	0.27	unclassified_Metazoa	0.27	unclassified_Metazoa_sp	0.27	0	0	0	0	0	0	0	0	0	0	0	0	0	0	0	0	0	0	0	0	0	0	0	0	0	0	0	0	0	0	0	1	0	0
12a71951e44b85067cb97749fecc46c9edc19ecf	#N/A	Metazoa	0.83	unclassified_Metazoa	0.3	unclassified_Metazoa	0.3	unclassified_Metazoa	0.27	unclassified_Metazoa	0.27	unclassified_Metazoa	0.27	unclassified_Metazoa_sp	0.27	0	0	0	0	0	0	0	0	0	0	0	0	0	0	0	0	0	0	0	0	0	0	0	0	0	0	0	0	0	0	0	0	0	0
3ab7c4a629d3f63c4656c60aa9bf04d3f2a81026	#N/A	Metazoa	0.87	unclassified_Metazoa	0.27	unclassified_Metazoa	0.27	unclassified_Metazoa	0.27	unclassified_Metazoa	0.27	unclassified_Metazoa	0.27	unclassified_Metazoa_sp	0.27	0	0	0	0	0	0	0	0	0	0	0	0	0	0	0	0	0	0	0	0	0	0	0	0	0	0	0	0	0	0	0	0	0	0
929b77b12981c1e30387f2a01f48da8e915f5e87	#N/A	Metazoa	0.89	unclassified_Metazoa	0.27	unclassified_Metazoa	0.27	unclassified_Metazoa	0.27	unclassified_Metazoa	0.27	unclassified_Metazoa	0.27	unclassified_Metazoa_sp	0.27	0	0	0	0	1	0	0	0	0	0	0	0	0	0	0	0	0	0	0	0	0	0	0	0	0	0	0	0	0	0	0	0	1	0
9c46b29e17e87edc91ae3e31e8e697a05cdb3da9	#N/A	Metazoa	0.83	unclassified_Metazoa	0.27	unclassified_Metazoa	0.27	unclassified_Metazoa	0.27	unclassified_Metazoa	0.27	unclassified_Metazoa	0.27	unclassified_Metazoa_sp	0.27	0	0	0	0	0	0	0	0	0	0	0	0	0	0	0	0	0	0	0	0	0	0	0	0	0	0	0	0	0	0	0	0	0	0
f4a98aaea0162f82d83979baf2e44bde3c9987d5	#N/A	Metazoa	0.9	unclassified_Metazoa	0.52	unclassified_Metazoa	0.27	unclassified_Metazoa	0.27	unclassified_Metazoa	0.27	unclassified_Metazoa	0.27	unclassified_Metazoa_sp	0.27	0	0	0	0	0	0	0	0	0	0	0	0	0	0	0	0	0	0	0	0	0	0	0	0	0	0	0	0	0	0	0	0	0	0
4b7425e5bca7d60713969de4b726770d779210e8	#N/A	Metazoa	0.8	unclassified_Metazoa	0.27	unclassified_Metazoa	0.27	unclassified_Metazoa	0.27	unclassified_Metazoa	0.27	unclassified_Metazoa	0.27	unclassified_Metazoa_sp	0.27	0	0	0	0	0	0	0	0	0	0	0	0	0	0	0	0	0	0	0	0	0	0	0	0	0	0	0	0	0	0	3	0	0	0
46c54abad0d5b6ed8b10998edbb81b76bc2c3c9f	#N/A	Metazoa	0.83	unclassified_Metazoa	0.28	unclassified_Metazoa	0.27	unclassified_Metazoa	0.27	unclassified_Metazoa	0.27	unclassified_Metazoa	0.27	unclassified_Metazoa_sp	0.27	0	3	0	2	0	1	0	0	0	0	0	0	0	0	0	0	0	0	0	0	0	0	0	0	0	0	0	0	0	0	0	1	0	0
09ab6f943a5ab8eb11b5760b970eb530343c0d04	#N/A	Metazoa	0.85	unclassified_Metazoa	0.28	unclassified_Metazoa	0.27	unclassified_Metazoa	0.27	unclassified_Metazoa	0.27	unclassified_Metazoa	0.27	unclassified_Metazoa_sp	0.27	0	0	0	0	0	0	0	0	0	0	0	0	0	0	0	0	0	0	0	0	0	0	0	0	0	0	0	0	0	0	0	0	0	0
72eeea37bb9495280969fc610f00b3b303202914	#N/A	Metazoa	0.8	unclassified_Metazoa	0.77	unclassified_Metazoa	0.76	unclassified_Metazoa	0.43	unclassified_Metazoa	0.29	unclassified_Metazoa	0.27	unclassified_Metazoa_sp	0.2	0	0	0	0	0	0	0	0	0	0	0	0	0	0	0	0	0	0	0	0	0	0	0	0	0	0	0	0	0	0	0	0	0	0
1ca520eee658ae26cf771a9eb9b036e3aeae9c13	#N/A	Metazoa	0.94	unclassified_Metazoa	0.65	unclassified_Metazoa	0.65	unclassified_Metazoa	0.27	unclassified_Metazoa	0.27	unclassified_Metazoa	0.27	unclassified_Metazoa_sp	0.19	0	1	0	0	0	0	0	0	0	0	0	0	0	0	0	0	0	0	0	0	0	0	0	0	0	0	0	0	0	0	0	0	0	0
16e07183a7b24dc06c7eee7cacec3487f85b201c	#N/A	Metazoa	0.82	unclassified_Metazoa	0.26	unclassified_Metazoa	0.26	unclassified_Metazoa	0.26	unclassified_Metazoa	0.26	unclassified_Metazoa	0.26	unclassified_Metazoa_sp	0.26	0	0	0	0	0	0	0	0	0	0	0	0	0	0	0	0	0	0	0	0	0	0	0	0	0	0	0	0	0	0	0	0	0	0
19cfa6b50c382485d465157a9cd7c566a74d6c71	#N/A	Metazoa	0.8	unclassified_Metazoa	0.44	unclassified_Metazoa	0.44	unclassified_Metazoa	0.44	unclassified_Metazoa	0.37	unclassified_Metazoa	0.26	unclassified_Metazoa_sp	0.26	0	0	0	0	0	0	0	0	0	0	0	0	0	0	0	1	0	0	0	0	0	0	0	0	0	0	0	0	0	0	0	0	0	0
23cbc0ae11c00ea68d6d2db9aff517cb50721b38	#N/A	Metazoa	0.83	unclassified_Metazoa	0.26	unclassified_Metazoa	0.26	unclassified_Metazoa	0.26	unclassified_Metazoa	0.26	unclassified_Metazoa	0.26	unclassified_Metazoa_sp	0.26	0	0	0	0	0	0	0	0	0	0	0	0	0	0	0	0	0	0	0	0	0	0	0	0	0	0	0	0	0	0	0	0	0	0
42032162ed00277370a7046927bcca0c6d47c9f0	#N/A	Metazoa	0.86	unclassified_Metazoa	0.29	unclassified_Metazoa	0.29	unclassified_Metazoa	0.26	unclassified_Metazoa	0.26	unclassified_Metazoa	0.26	unclassified_Metazoa_sp	0.26	0	0	0	0	0	0	0	0	0	0	0	0	0	0	0	0	0	0	0	1	0	0	0	0	0	0	0	0	0	0	0	0	0	0
6119601d5dd811f1c180a0a082d8ebeba9c9f9a1	#N/A	Metazoa	0.83	unclassified_Metazoa	0.31	unclassified_Metazoa	0.29	unclassified_Metazoa	0.26	unclassified_Metazoa	0.26	unclassified_Metazoa	0.26	unclassified_Metazoa_sp	0.26	0	0	0	0	0	0	0	0	0	0	0	0	0	0	0	0	0	0	0	0	0	0	0	1	0	0	0	0	0	0	0	0	0	0
6824681b8b86252c00be90b7a618db2ecaa2c4a5	#N/A	Metazoa	0.81	unclassified_Metazoa	0.27	unclassified_Metazoa	0.26	unclassified_Metazoa	0.26	unclassified_Metazoa	0.26	unclassified_Metazoa	0.26	unclassified_Metazoa_sp	0.26	0	0	0	0	0	0	0	0	0	0	0	0	0	0	0	0	0	0	0	0	0	0	0	0	0	0	0	0	0	0	0	0	0	0
7515faa5b24da0c96474dd9c1ce93ce0b221c9de	#N/A	Metazoa	0.87	unclassified_Metazoa	0.29	unclassified_Metazoa	0.29	unclassified_Metazoa	0.26	unclassified_Metazoa	0.26	unclassified_Metazoa	0.26	unclassified_Metazoa_sp	0.26	0	0	0	0	0	0	0	0	0	0	0	0	0	0	0	0	0	0	0	0	0	0	0	1	0	0	0	0	0	0	0	0	0	0
9024e7b7ff768a30f2ae230879bfcfa46d745354	#N/A	Metazoa	0.8	unclassified_Metazoa	0.26	unclassified_Metazoa	0.26	unclassified_Metazoa	0.26	unclassified_Metazoa	0.26	unclassified_Metazoa	0.26	unclassified_Metazoa_sp	0.26	0	0	0	0	0	0	0	0	0	0	0	0	0	0	0	0	0	0	0	0	0	0	0	0	0	0	1	0	0	0	0	0	0	0
a08b6955975f9c1a71fb6fb3e1bb782a59841d73	#N/A	Metazoa	0.88	unclassified_Metazoa	0.26	unclassified_Metazoa	0.26	unclassified_Metazoa	0.26	unclassified_Metazoa	0.26	unclassified_Metazoa	0.26	unclassified_Metazoa_sp	0.26	0	0	0	0	0	0	0	0	0	0	0	0	0	0	0	0	0	0	0	0	0	0	0	0	0	0	0	0	0	0	0	0	1	0
b0e32b7953d010b4546ebbc579a5134c967e1247	#N/A	Metazoa	0.85	unclassified_Metazoa	0.27	unclassified_Metazoa	0.27	unclassified_Metazoa	0.26	unclassified_Metazoa	0.26	unclassified_Metazoa	0.26	unclassified_Metazoa_sp	0.26	0	0	0	0	0	1	0	0	0	0	0	0	0	0	0	0	0	0	0	0	0	0	0	0	0	0	0	0	0	0	0	0	0	0
d795f523666b767954910ca547bbcd4f2d7205e7	#N/A	Metazoa	0.8	unclassified_Metazoa	0.27	unclassified_Metazoa	0.27	unclassified_Metazoa	0.26	unclassified_Metazoa	0.26	unclassified_Metazoa	0.26	unclassified_Metazoa_sp	0.26	0	0	0	0	0	0	0	0	0	0	0	0	0	0	0	0	0	0	0	0	0	0	0	0	0	0	0	0	0	0	0	0	0	0
da1f9d223f08767c3972668bb5d9ab1433c80886	#N/A	Metazoa	0.85	unclassified_Metazoa	0.26	unclassified_Metazoa	0.26	unclassified_Metazoa	0.26	unclassified_Metazoa	0.26	unclassified_Metazoa	0.26	unclassified_Metazoa_sp	0.26	0	0	0	0	0	0	0	0	0	0	0	0	0	0	0	0	0	0	0	0	0	0	0	0	0	0	0	0	0	0	0	0	0	0
f1215e9f0b6689d2efd718a090634d7e4562fce0	#N/A	Metazoa	0.83	unclassified_Metazoa	0.28	unclassified_Metazoa	0.28	unclassified_Metazoa	0.27	unclassified_Metazoa	0.26	unclassified_Metazoa	0.26	unclassified_Metazoa_sp	0.26	0	0	0	1	0	0	0	0	0	0	0	0	0	0	0	0	0	0	0	0	0	0	0	0	0	0	0	0	0	0	0	0	0	0
40c29b42835a5e0b62a67ca1c1afbc9d2944b0ea	#N/A	Metazoa	0.82	unclassified_Metazoa	0.26	unclassified_Metazoa	0.26	unclassified_Metazoa	0.26	unclassified_Metazoa	0.26	unclassified_Metazoa	0.26	unclassified_Metazoa_sp	0.26	0	0	0	0	0	0	0	0	0	0	0	0	0	0	0	0	0	0	0	0	0	0	0	0	0	0	0	0	0	0	0	0	0	0
cacf265e34fa3e88bee83d4796dbf42ac2020250	#N/A	Metazoa	0.84	unclassified_Metazoa	0.36	unclassified_Metazoa	0.26	unclassified_Metazoa	0.26	unclassified_Metazoa	0.26	unclassified_Metazoa	0.26	unclassified_Metazoa_sp	0.26	0	0	0	0	0	0	0	0	0	0	0	0	0	0	0	0	0	0	0	0	0	0	0	0	0	0	0	0	0	0	0	0	0	0
620e09bb7936f6d33f2872161a6ab36c398ae20b	#N/A	Metazoa	0.8	unclassified_Metazoa	0.26	unclassified_Metazoa	0.26	unclassified_Metazoa	0.26	unclassified_Metazoa	0.26	unclassified_Metazoa	0.26	unclassified_Metazoa_sp	0.26	0	3	0	0	0	0	0	0	0	0	0	0	0	0	0	0	0	0	0	0	0	0	0	0	0	0	0	0	0	0	0	0	0	0
14b1b6e359b888696e8b3f1b225ec5ddc913c3ab	#N/A	Metazoa	0.81	unclassified_Metazoa	0.26	unclassified_Metazoa	0.26	unclassified_Metazoa	0.26	unclassified_Metazoa	0.26	unclassified_Metazoa	0.26	unclassified_Metazoa_sp	0.26	0	0	0	4	0	0	0	0	0	0	0	0	0	0	0	0	0	0	0	0	0	0	0	0	0	0	0	0	0	0	0	0	1	0
fa391954c0979fa6b95a4c87c56632c733ce1085	#N/A	Metazoa	0.83	unclassified_Metazoa	0.26	unclassified_Metazoa	0.26	unclassified_Metazoa	0.26	unclassified_Metazoa	0.26	unclassified_Metazoa	0.26	unclassified_Metazoa_sp	0.26	0	0	0	0	0	0	0	0	0	0	0	0	0	0	0	0	0	0	0	0	0	0	0	0	0	0	0	0	0	0	0	0	0	0
ec1e3d606177687f94ab21e38a553176a219eb05	#N/A	Metazoa	0.85	unclassified_Metazoa	0.26	unclassified_Metazoa	0.26	unclassified_Metazoa	0.26	unclassified_Metazoa	0.26	unclassified_Metazoa	0.26	unclassified_Metazoa_sp	0.26	0	8	0	0	0	0	0	0	0	0	0	0	0	0	0	0	0	0	0	0	0	0	0	0	0	0	0	0	0	0	0	0	0	0
e0a5aeddcd92a3c0ab023d1ab95f4dd217c139f9	#N/A	Metazoa	0.85	unclassified_Metazoa	0.26	unclassified_Metazoa	0.26	unclassified_Metazoa	0.26	unclassified_Metazoa	0.26	unclassified_Metazoa	0.26	unclassified_Metazoa_sp	0.26	0	0	2	0	0	0	3	0	4	0	2	0	0	0	0	0	0	0	0	0	0	0	0	0	0	0	0	0	0	3	1	0	0	0
e237f8cf0600f0a25fb7f703cfded008921888ea	#N/A	Metazoa	0.83	unclassified_Metazoa	0.72	unclassified_Metazoa	0.72	unclassified_Metazoa	0.39	unclassified_Metazoa	0.39	unclassified_Metazoa	0.26	unclassified_Metazoa_sp	0.26	0	0	0	0	0	0	0	0	0	0	0	14	0	0	47	0	0	0	0	0	0	0	2	0	0	0	0	0	0	0	0	0	0	0
bdbf51cdd9283f2c832ca4cff4daf0b46d7a74fb	#N/A	Metazoa	0.97	unclassified_Metazoa	0.6	unclassified_Metazoa	0.6	unclassified_Metazoa	0.47	unclassified_Metazoa	0.28	unclassified_Metazoa	0.26	unclassified_Metazoa_sp	0.12	1	0	0	0	0	0	0	0	0	0	0	0	0	0	0	0	0	0	0	0	0	0	0	0	0	0	0	0	0	0	0	0	0	0
1f6502950613dd3ce592931757eaf9afd538d231	#N/A	Metazoa	0.82	unclassified_Metazoa	0.29	unclassified_Metazoa	0.29	unclassified_Metazoa	0.27	unclassified_Metazoa	0.25	unclassified_Metazoa	0.25	unclassified_Metazoa_sp	0.25	0	0	0	0	0	0	0	0	0	0	0	0	0	0	0	0	0	0	0	0	0	0	0	0	0	0	0	0	0	0	0	0	0	0
4df654eb66d4c1ee99d23bab3fe711f9fd51fa5a	#N/A	Metazoa	0.87	unclassified_Metazoa	0.4	unclassified_Metazoa	0.25	unclassified_Metazoa	0.25	unclassified_Metazoa	0.25	unclassified_Metazoa	0.25	unclassified_Metazoa_sp	0.25	0	0	0	0	0	0	0	0	0	0	0	0	0	0	0	0	0	0	0	0	0	0	0	0	1	0	0	0	0	0	0	0	0	0
cb3146b3894be0b74320b9a79ae17824bdef3add	#N/A	Metazoa	0.89	unclassified_Metazoa	0.26	unclassified_Metazoa	0.25	unclassified_Metazoa	0.25	unclassified_Metazoa	0.25	unclassified_Metazoa	0.25	unclassified_Metazoa_sp	0.25	0	0	0	0	0	0	0	0	0	0	0	0	0	0	0	0	0	0	0	0	0	0	0	0	0	0	0	0	0	0	0	0	0	0
ecb6ff889ee059b05bdbb7664424a57cc2eb8ad0	#N/A	Metazoa	0.84	unclassified_Metazoa	0.25	unclassified_Metazoa	0.25	unclassified_Metazoa	0.25	unclassified_Metazoa	0.25	unclassified_Metazoa	0.25	unclassified_Metazoa_sp	0.25	0	0	0	0	0	0	0	0	0	0	0	0	0	0	0	0	0	0	0	0	0	0	0	0	0	0	0	0	0	0	0	0	0	0
f45bf403bc162c6f84dc4e695a0ac9022158035f	#N/A	Metazoa	0.85	unclassified_Metazoa	0.25	unclassified_Metazoa	0.25	unclassified_Metazoa	0.25	unclassified_Metazoa	0.25	unclassified_Metazoa	0.25	unclassified_Metazoa_sp	0.25	0	0	0	0	0	0	0	0	0	0	0	0	0	0	0	0	0	0	0	0	0	0	0	0	0	0	0	0	0	0	0	0	0	0
5393b1759c63d9aaac4fdc586fc84dd5c27ceef9	#N/A	Metazoa	0.99	unclassified_Metazoa	0.51	unclassified_Metazoa	0.46	unclassified_Metazoa	0.41	unclassified_Metazoa	0.37	unclassified_Metazoa	0.25	unclassified_Metazoa_sp	0.25	0	0	0	0	0	0	0	0	0	0	0	0	0	0	0	0	0	0	0	0	0	0	0	0	0	0	0	0	0	2	0	0	0	0
74ec5808e97abb39f37692714bfa2894518d2833	#N/A	Metazoa	0.91	unclassified_Metazoa	0.39	unclassified_Metazoa	0.39	unclassified_Metazoa	0.25	unclassified_Metazoa	0.25	unclassified_Metazoa	0.25	unclassified_Metazoa_sp	0.25	0	0	0	0	0	0	0	0	0	0	0	0	0	0	0	0	0	0	0	0	0	0	0	0	0	0	0	0	0	0	0	0	0	0
7a1857255529a937c87cc35d52d2c17ee966a286	#N/A	Metazoa	0.85	unclassified_Metazoa	0.25	unclassified_Metazoa	0.25	unclassified_Metazoa	0.25	unclassified_Metazoa	0.25	unclassified_Metazoa	0.25	unclassified_Metazoa_sp	0.25	0	0	0	0	0	0	0	0	0	0	0	0	0	0	0	0	0	0	0	0	0	0	0	0	0	0	0	0	0	0	0	0	0	0
969e894902c9be98dfd1691884a8b495b1ddf190	#N/A	Metazoa	0.83	unclassified_Metazoa	0.25	unclassified_Metazoa	0.25	unclassified_Metazoa	0.25	unclassified_Metazoa	0.25	unclassified_Metazoa	0.25	unclassified_Metazoa_sp	0.25	0	0	0	0	0	0	0	0	10	0	0	0	0	0	0	0	0	0	0	0	0	0	0	0	0	0	0	0	0	0	0	0	0	0
2ebe0550c80024a0c560406d7cd88405b69a594c	#N/A	Metazoa	0.84	unclassified_Metazoa	0.28	unclassified_Metazoa	0.25	unclassified_Metazoa	0.25	unclassified_Metazoa	0.25	unclassified_Metazoa	0.25	unclassified_Metazoa_sp	0.25	0	0	0	0	0	0	0	0	0	0	0	0	0	0	0	0	0	2	1	0	0	0	0	0	0	0	0	0	0	0	1	0	0	2
f582508f784f697285f9839d2a3526577cdfa751	#N/A	Metazoa	0.82	unclassified_Metazoa	0.73	unclassified_Metazoa	0.62	unclassified_Metazoa	0.33	unclassified_Metazoa	0.25	unclassified_Metazoa	0.25	unclassified_Metazoa_sp	0.19	0	0	0	0	0	0	0	0	0	0	0	0	0	0	0	0	0	0	0	0	0	0	0	0	0	0	0	0	0	0	0	0	0	0
eda7a932ca8f20d1a1426c0ffff9db3561c85860	#N/A	Metazoa	0.95	unclassified_Metazoa	0.72	unclassified_Metazoa	0.72	unclassified_Metazoa	0.64	unclassified_Metazoa	0.54	unclassified_Metazoa	0.25	unclassified_Metazoa_sp	0.18	0	0	0	0	0	0	0	0	0	0	0	0	0	0	0	0	0	0	0	0	0	0	0	0	0	0	0	0	0	0	0	0	0	0
e9b6ecfd3940687a3c98c5dadc09ad9260836370	#N/A	Metazoa	0.92	unclassified_Metazoa	0.48	unclassified_Metazoa	0.48	unclassified_Metazoa	0.45	unclassified_Metazoa	0.3	unclassified_Metazoa	0.25	unclassified_Metazoa_sp	0.13	0	0	0	0	0	0	0	0	0	0	0	0	0	0	0	0	1	0	0	0	0	0	0	0	0	0	0	0	0	0	0	0	0	0
0cfa99c36b019a24726da7253d2c03a795e2ece4	#N/A	Metazoa	0.8	unclassified_Metazoa	0.25	unclassified_Metazoa	0.25	unclassified_Metazoa	0.24	unclassified_Metazoa	0.24	unclassified_Metazoa	0.24	unclassified_Metazoa_sp	0.24	0	0	0	0	0	0	0	0	0	0	0	0	0	0	0	0	0	0	0	0	0	0	0	0	0	0	0	0	0	0	0	0	0	0
1ffdb430164d95fba0b2f38bf40e53ca003e5693	#N/A	Metazoa	0.89	unclassified_Metazoa	0.25	unclassified_Metazoa	0.24	unclassified_Metazoa	0.24	unclassified_Metazoa	0.24	unclassified_Metazoa	0.24	unclassified_Metazoa_sp	0.24	0	0	0	0	0	0	0	0	0	0	0	0	0	0	0	0	0	0	0	0	0	0	0	0	0	0	0	0	0	1	0	0	0	0
23dc8f8a7399256e3892216a2d54fd7cfa631460	#N/A	Metazoa	0.83	unclassified_Metazoa	0.25	unclassified_Metazoa	0.24	unclassified_Metazoa	0.24	unclassified_Metazoa	0.24	unclassified_Metazoa	0.24	unclassified_Metazoa_sp	0.24	0	0	0	0	0	0	0	0	0	0	0	0	0	0	0	0	0	0	0	0	0	0	0	0	0	0	0	0	0	0	0	1	0	0
46559b5eef0075288a58161398b1de5d1032762d	#N/A	Metazoa	0.86	unclassified_Metazoa	0.3	unclassified_Metazoa	0.24	unclassified_Metazoa	0.24	unclassified_Metazoa	0.24	unclassified_Metazoa	0.24	unclassified_Metazoa_sp	0.24	0	0	0	0	0	0	0	0	0	0	0	0	0	0	0	0	0	0	0	0	0	0	0	0	0	0	0	0	0	0	0	0	0	0
699cb248ecf6a6d788061cd70fc4f9c158f445fa	#N/A	Metazoa	0.85	unclassified_Metazoa	0.25	unclassified_Metazoa	0.24	unclassified_Metazoa	0.24	unclassified_Metazoa	0.24	unclassified_Metazoa	0.24	unclassified_Metazoa_sp	0.24	0	0	0	0	0	0	0	0	0	0	0	0	0	0	0	0	0	0	0	0	0	0	0	0	0	0	0	0	0	0	1	0	0	0
75b89e9065ca73eceecaf9b740204148cc31c457	#N/A	Metazoa	0.87	unclassified_Metazoa	0.27	unclassified_Metazoa	0.24	unclassified_Metazoa	0.24	unclassified_Metazoa	0.24	unclassified_Metazoa	0.24	unclassified_Metazoa_sp	0.24	0	0	0	0	0	0	0	0	1	0	0	0	0	0	0	0	0	0	0	0	0	0	0	0	0	0	0	0	0	0	0	0	0	0
b1ff209c1df6960b1436989d9518209a78520daa	#N/A	Metazoa	0.86	unclassified_Metazoa	0.24	unclassified_Metazoa	0.24	unclassified_Metazoa	0.24	unclassified_Metazoa	0.24	unclassified_Metazoa	0.24	unclassified_Metazoa_sp	0.24	0	0	0	0	0	0	0	0	0	0	0	0	0	0	0	0	0	0	0	0	0	0	0	0	0	0	0	0	0	0	0	0	0	0
d48f53ad0c2729418e45f7c828a2fb1231e1ebae	#N/A	Metazoa	1	unclassified_Metazoa	0.47	unclassified_Metazoa	0.47	unclassified_Metazoa	0.47	unclassified_Metazoa	0.26	unclassified_Metazoa	0.24	unclassified_Metazoa_sp	0.24	0	0	0	0	0	0	0	0	0	0	0	0	0	0	0	0	0	0	0	0	0	0	1	0	0	0	0	0	0	0	0	0	0	0
600eb94bbaaa94fa7dd6d984a45921886827fbd4	#N/A	Metazoa	0.89	unclassified_Metazoa	0.25	unclassified_Metazoa	0.25	unclassified_Metazoa	0.24	unclassified_Metazoa	0.24	unclassified_Metazoa	0.24	unclassified_Metazoa_sp	0.24	2	0	0	0	0	0	0	0	0	0	0	0	0	0	0	0	0	0	0	0	0	0	0	0	0	0	0	0	0	0	0	0	0	0
d954883f81a69a89ce3fff4cc57ea79bfb27342b	#N/A	Metazoa	0.8	unclassified_Metazoa	0.24	unclassified_Metazoa	0.24	unclassified_Metazoa	0.24	unclassified_Metazoa	0.24	unclassified_Metazoa	0.24	unclassified_Metazoa_sp	0.24	0	0	0	1	1	0	0	0	0	0	0	0	0	0	0	0	0	0	0	0	0	0	0	0	0	0	0	0	0	0	0	0	0	1
035de2d08c575a0519903610d184214371d6913b	#N/A	Metazoa	0.83	unclassified_Metazoa	0.25	unclassified_Metazoa	0.24	unclassified_Metazoa	0.24	unclassified_Metazoa	0.24	unclassified_Metazoa	0.24	unclassified_Metazoa_sp	0.24	0	0	0	0	0	0	0	0	0	1	0	0	0	0	0	0	0	0	0	0	0	0	0	0	0	0	0	0	0	0	1	0	0	0
54248f192799e51ddfbce79a085ed928762d51f3	#N/A	Metazoa	0.81	unclassified_Metazoa	0.26	unclassified_Metazoa	0.25	unclassified_Metazoa	0.24	unclassified_Metazoa	0.24	unclassified_Metazoa	0.24	unclassified_Metazoa_sp	0.24	0	0	0	0	0	0	0	0	0	0	2	0	0	1	0	0	0	0	0	0	0	0	0	0	1	0	0	0	0	0	0	0	0	0
fc1d0f90c65a4e5e5de98fd3f2ce3ef237e9cf8f	#N/A	Metazoa	0.82	unclassified_Metazoa	0.24	unclassified_Metazoa	0.24	unclassified_Metazoa	0.24	unclassified_Metazoa	0.24	unclassified_Metazoa	0.24	unclassified_Metazoa_sp	0.24	0	0	0	0	0	0	0	0	1	0	0	0	0	0	0	0	0	0	0	0	0	0	0	0	0	0	0	0	0	0	0	0	0	0
c4742dea139a82c4f04a916e60788ee6d476908a	#N/A	Metazoa	0.81	unclassified_Metazoa	0.25	unclassified_Metazoa	0.24	unclassified_Metazoa	0.24	unclassified_Metazoa	0.24	unclassified_Metazoa	0.24	unclassified_Metazoa_sp	0.24	0	0	0	0	1	0	1	0	1	0	0	0	0	0	0	0	0	0	0	0	0	0	0	0	0	0	0	0	0	0	1	0	1	0
6e650a81f1248493b447fb71512f3ee0efde9547	#N/A	Metazoa	0.9	unclassified_Metazoa	0.5	unclassified_Metazoa	0.5	unclassified_Metazoa	0.43	unclassified_Metazoa	0.24	unclassified_Metazoa	0.24	unclassified_Metazoa_sp	0.23	0	0	0	0	0	0	0	0	0	0	0	0	0	0	0	0	0	0	0	0	0	0	0	0	0	0	0	0	0	0	0	0	0	0
4afad8df680c06fc1ee01b8201b3dd0e0f577ce0	#N/A	Metazoa	0.88	unclassified_Metazoa	0.3	unclassified_Metazoa	0.3	unclassified_Metazoa	0.24	unclassified_Metazoa	0.24	unclassified_Metazoa	0.24	unclassified_Metazoa_sp	0.22	0	0	0	0	0	0	0	0	0	0	0	0	0	0	0	0	0	0	0	0	0	0	0	0	0	0	0	0	0	0	0	0	0	0
6bc326037e7e07a13b786219fa7f5a1cd618d7dd	#N/A	Metazoa	1	unclassified_Metazoa	0.65	unclassified_Metazoa	0.65	unclassified_Metazoa	0.43	unclassified_Metazoa	0.38	unclassified_Metazoa	0.24	unclassified_Metazoa_sp	0.22	0	0	0	0	0	0	0	0	0	0	0	0	0	1	0	0	0	0	0	0	0	0	0	0	0	0	0	0	0	0	0	0	0	0
7052506eb9c06263350cf2aa19efe1015a8fa63d	#N/A	Metazoa	1	unclassified_Metazoa	0.42	unclassified_Metazoa	0.42	unclassified_Metazoa	0.42	unclassified_Metazoa	0.25	unclassified_Metazoa	0.24	unclassified_Metazoa_sp	0.22	0	0	0	0	0	0	0	0	0	0	0	0	0	0	0	0	0	1	0	1	0	0	0	8	30	23	9	9	2	0	0	0	0	0
e44f040f106d126fdd17a3c83d6c6c595d85bad1	#N/A	Metazoa	0.88	unclassified_Metazoa	0.49	unclassified_Metazoa	0.49	unclassified_Metazoa	0.48	unclassified_Metazoa	0.24	unclassified_Metazoa	0.24	unclassified_Metazoa_sp	0.21	0	0	0	0	0	0	0	0	0	0	0	0	0	0	0	0	0	0	0	0	0	0	0	1	0	0	0	0	0	0	0	0	0	0
9d3912cb756eb91ef35bb21fa72050a20575fd24	#N/A	Metazoa	0.99	unclassified_Metazoa	0.67	unclassified_Metazoa	0.67	unclassified_Metazoa	0.6	unclassified_Metazoa	0.28	unclassified_Metazoa	0.24	unclassified_Metazoa_sp	0.17	0	0	0	0	0	0	0	0	0	0	0	0	0	0	0	0	0	0	0	0	0	0	0	0	0	0	0	0	0	0	0	0	0	0
e417229c601e387e226458b8d31b7b82d96d6496	#N/A	Metazoa	1	unclassified_Metazoa	0.54	unclassified_Metazoa	0.47	unclassified_Metazoa	0.3	unclassified_Metazoa	0.24	unclassified_Metazoa	0.24	unclassified_Metazoa_sp	0.17	0	0	0	0	0	0	0	0	0	0	0	0	0	0	0	0	0	0	0	0	0	0	0	0	1	1	0	0	0	0	0	0	0	0
72bbc1d4879fc0b14e3d0ce7db15c1ded310fed2	#N/A	Metazoa	0.99	unclassified_Metazoa	0.38	unclassified_Metazoa	0.38	unclassified_Metazoa	0.38	unclassified_Metazoa	0.24	unclassified_Metazoa	0.24	unclassified_Metazoa_sp	0.13	0	0	0	0	0	0	0	0	1	0	0	0	0	0	0	0	0	0	0	0	0	0	0	0	0	0	0	0	0	0	0	0	0	0
64c76cc933f678041be885a9427b123c4e59e0fd	#N/A	Metazoa	0.87	unclassified_Metazoa	0.24	unclassified_Metazoa	0.23	unclassified_Metazoa	0.23	unclassified_Metazoa	0.23	unclassified_Metazoa	0.23	unclassified_Metazoa_sp	0.23	0	0	0	0	0	0	1	0	0	0	0	0	0	0	0	0	0	0	0	0	0	0	0	0	0	0	0	0	0	0	0	0	0	0
c81291268fbafaddf0a3247c2667378ba7bc61d1	#N/A	Metazoa	0.87	unclassified_Metazoa	0.4	unclassified_Metazoa	0.23	unclassified_Metazoa	0.23	unclassified_Metazoa	0.23	unclassified_Metazoa	0.23	unclassified_Metazoa_sp	0.23	0	0	0	0	0	0	0	0	0	0	0	0	0	0	0	0	0	0	0	0	0	0	0	0	0	0	0	0	0	0	0	0	0	0
d4922d9ce7c7d753921217d9922d1126eda7ac46	#N/A	Metazoa	0.8	unclassified_Metazoa	0.29	unclassified_Metazoa	0.23	unclassified_Metazoa	0.23	unclassified_Metazoa	0.23	unclassified_Metazoa	0.23	unclassified_Metazoa_sp	0.23	0	0	0	0	0	0	0	0	0	0	0	0	0	0	0	0	0	0	0	0	0	0	0	0	0	0	0	0	0	0	0	0	0	0
e2c594e51bd3971f6675e2aa45a982e0ef0a776f	#N/A	Metazoa	0.81	unclassified_Metazoa	0.28	unclassified_Metazoa	0.23	unclassified_Metazoa	0.23	unclassified_Metazoa	0.23	unclassified_Metazoa	0.23	unclassified_Metazoa_sp	0.23	0	0	0	0	0	0	0	0	0	0	0	0	0	0	0	0	0	0	0	0	0	0	0	0	0	0	0	0	0	0	0	0	0	0
fde26eb67c7c969995c1932a35d994b3c13ce1b4	#N/A	Metazoa	0.88	unclassified_Metazoa	0.78	unclassified_Metazoa	0.42	unclassified_Metazoa	0.25	unclassified_Metazoa	0.24	unclassified_Metazoa	0.23	unclassified_Metazoa_sp	0.23	0	0	0	0	0	0	0	0	0	0	0	0	0	0	0	1	0	0	0	0	0	0	0	0	0	0	0	0	0	0	0	0	0	0
748423d30377508d36bbb759a6646e556d525bbb	#N/A	Metazoa	0.85	unclassified_Metazoa	0.35	unclassified_Metazoa	0.23	unclassified_Metazoa	0.23	unclassified_Metazoa	0.23	unclassified_Metazoa	0.23	unclassified_Metazoa_sp	0.23	0	0	0	0	0	0	0	0	0	0	2	0	0	0	0	0	0	0	0	0	0	0	0	0	0	0	0	0	0	0	0	0	0	0
02feb7ae45c9c77651777f4e922e38cb5380279b	#N/A	Metazoa	0.83	unclassified_Metazoa	0.22	unclassified_Metazoa	0.22	unclassified_Metazoa	0.22	unclassified_Metazoa	0.22	unclassified_Metazoa	0.22	unclassified_Metazoa_sp	0.22	0	0	0	1	0	0	0	0	0	0	0	0	0	0	0	0	0	0	0	0	0	0	0	0	0	0	0	0	0	0	0	0	0	0
0ebe3977123fcdcb92062e3fb6dd014a0b886e45	#N/A	Metazoa	1	unclassified_Metazoa	0.47	unclassified_Metazoa	0.42	unclassified_Metazoa	0.25	unclassified_Metazoa	0.24	unclassified_Metazoa	0.22	unclassified_Metazoa_sp	0.22	0	0	0	0	0	0	0	0	1	0	0	0	0	0	0	0	0	0	0	0	0	0	0	0	0	0	0	0	0	0	0	0	0	0
162a9387d2ee4c2f2b9edf6c4c592cf59bfeb0ce	#N/A	Metazoa	0.83	unclassified_Metazoa	0.22	unclassified_Metazoa	0.22	unclassified_Metazoa	0.22	unclassified_Metazoa	0.22	unclassified_Metazoa	0.22	unclassified_Metazoa_sp	0.22	0	0	0	0	0	0	0	0	0	0	0	0	0	0	0	0	1	0	0	0	0	0	0	0	0	0	0	0	0	0	0	0	0	0
44e5a7bad27fe9ec47e37334ec2a43400e8b78d0	#N/A	Metazoa	0.81	unclassified_Metazoa	0.3	unclassified_Metazoa	0.22	unclassified_Metazoa	0.22	unclassified_Metazoa	0.22	unclassified_Metazoa	0.22	unclassified_Metazoa_sp	0.22	0	0	0	0	0	0	0	0	0	0	0	0	0	0	0	0	0	0	0	0	0	0	0	0	0	0	0	0	0	0	0	0	0	0
7bc4aaa31bdaee2feb671f047f69983389ed5b21	#N/A	Metazoa	0.95	unclassified_Metazoa	0.61	unclassified_Metazoa	0.61	unclassified_Metazoa	0.47	unclassified_Metazoa	0.32	unclassified_Metazoa	0.22	unclassified_Metazoa_sp	0.22	0	0	0	0	0	0	0	0	0	0	0	0	0	0	0	0	0	0	0	0	0	0	0	0	0	0	0	0	0	0	0	0	0	0
f29b520c1c91d62041c229fcc6ee32c20cea9b7e	#N/A	Metazoa	0.84	unclassified_Metazoa	0.31	unclassified_Metazoa	0.3	unclassified_Metazoa	0.23	unclassified_Metazoa	0.22	unclassified_Metazoa	0.22	unclassified_Metazoa_sp	0.22	0	0	0	0	0	0	0	0	0	0	0	0	0	6	0	0	0	0	0	0	0	0	0	0	0	0	0	0	0	0	0	0	0	0
8c45e8705df99f41a905bd60967dcf9191dab59f	#N/A	Metazoa	0.82	unclassified_Metazoa	0.22	unclassified_Metazoa	0.22	unclassified_Metazoa	0.22	unclassified_Metazoa	0.22	unclassified_Metazoa	0.22	unclassified_Metazoa_sp	0.22	0	0	0	3	0	0	0	0	0	2	0	0	0	0	0	0	0	0	0	0	0	0	0	0	0	0	0	0	0	1	0	3	0	0
9fe7b93b45a693a70e4635367ebd58f1408f0dbb	#N/A	Metazoa	1	unclassified_Metazoa	0.24	unclassified_Metazoa	0.24	unclassified_Metazoa	0.24	unclassified_Metazoa	0.22	unclassified_Metazoa	0.22	unclassified_Metazoa_sp	0.22	0	0	0	0	0	0	0	0	0	0	0	0	0	0	0	0	0	0	0	0	0	0	0	7	0	0	0	1	3	0	0	0	0	0
6152453cd24e87d079760b25a1a02162c46c5d00	#N/A	Metazoa	1	unclassified_Metazoa	0.37	unclassified_Metazoa	0.37	unclassified_Metazoa	0.36	unclassified_Metazoa	0.32	unclassified_Metazoa	0.22	unclassified_Metazoa_sp	0.21	0	0	0	0	0	0	0	0	0	0	0	0	0	0	0	0	0	0	0	0	0	0	0	0	0	0	0	0	0	0	0	0	0	0
d2c2220781cdb770944228acf0569fd5f8fe9a50	#N/A	Metazoa	0.96	unclassified_Metazoa	0.72	unclassified_Metazoa	0.72	unclassified_Metazoa	0.69	unclassified_Metazoa	0.23	unclassified_Metazoa	0.22	unclassified_Metazoa_sp	0.19	0	0	0	0	0	0	1	0	0	0	0	0	0	0	0	0	0	0	0	0	0	0	0	0	0	0	0	0	0	0	0	0	0	0
4b5432eff84a819328dcd9380dcd7388980b73d7	#N/A	Metazoa	0.98	unclassified_Metazoa	0.78	unclassified_Metazoa	0.78	unclassified_Metazoa	0.44	unclassified_Metazoa	0.24	unclassified_Metazoa	0.22	unclassified_Metazoa_sp	0.17	0	0	1	0	0	0	0	0	0	0	0	0	0	0	0	0	0	0	0	0	0	0	0	0	0	0	0	0	0	0	0	0	0	0
323f8a5195ad93829c7d13d31d033c2cd9114430	#N/A	Metazoa	1	unclassified_Metazoa	0.74	unclassified_Metazoa	0.74	unclassified_Metazoa	0.53	unclassified_Metazoa	0.31	unclassified_Metazoa	0.22	unclassified_Metazoa_sp	0.16	0	0	0	0	0	0	0	0	0	0	0	0	0	0	0	0	0	0	0	0	0	0	0	0	0	0	0	0	0	1	0	0	0	0
a787a1db615f9359bb42fc2df9fe0324dc978949	#N/A	Metazoa	0.84	unclassified_Metazoa	0.39	unclassified_Metazoa	0.39	unclassified_Metazoa	0.36	unclassified_Metazoa	0.22	unclassified_Metazoa	0.22	unclassified_Metazoa_sp	0.16	0	0	0	0	0	0	0	0	0	0	0	0	0	0	0	0	0	0	0	0	0	0	0	0	0	0	0	0	0	0	0	0	0	0
5fd675c367acce09f64b1221d18b8d1aa4d7459c	#N/A	Metazoa	1	unclassified_Metazoa	0.31	unclassified_Metazoa	0.31	unclassified_Metazoa	0.31	unclassified_Metazoa	0.22	unclassified_Metazoa	0.22	unclassified_Metazoa_sp	0.16	0	0	0	0	0	1	0	0	0	0	0	0	0	0	0	0	0	0	0	0	0	0	0	0	0	0	0	0	0	0	0	0	0	0
a220ddfa673f7f387c64e050639cc888f7586a81	#N/A	Metazoa	0.99	unclassified_Metazoa	0.73	unclassified_Metazoa	0.73	unclassified_Metazoa	0.32	unclassified_Metazoa	0.22	unclassified_Metazoa	0.22	unclassified_Metazoa_sp	0.14	0	0	0	0	0	0	0	0	0	0	0	0	0	0	0	0	0	0	0	0	0	0	0	0	0	0	0	0	0	0	0	0	0	0
73f89b5c2df95fa06981116a96c8b66a65409819	#N/A	Metazoa	0.94	unclassified_Metazoa	0.43	unclassified_Metazoa	0.43	unclassified_Metazoa	0.42	unclassified_Metazoa	0.22	unclassified_Metazoa	0.22	unclassified_Metazoa_sp	0.09	0	0	0	0	0	0	0	0	0	0	0	1	0	0	0	0	0	0	0	0	0	0	0	0	0	0	0	0	0	0	0	0	0	0
0853c6c8e1d5079a979ba0248b08887e2e390393	#N/A	Metazoa	0.96	unclassified_Metazoa	0.78	unclassified_Metazoa	0.78	unclassified_Metazoa	0.68	unclassified_Metazoa	0.21	unclassified_Metazoa	0.21	unclassified_Metazoa_sp	0.21	0	0	0	0	0	0	0	0	0	0	0	0	0	0	0	0	0	0	0	0	0	0	0	0	0	0	0	0	0	0	0	0	0	0
0c8c8f7339d2244d00bb0eb0da1d23d4e19ea77c	#N/A	Metazoa	0.82	unclassified_Metazoa	0.21	unclassified_Metazoa	0.21	unclassified_Metazoa	0.21	unclassified_Metazoa	0.21	unclassified_Metazoa	0.21	unclassified_Metazoa_sp	0.21	0	0	0	0	0	0	1	0	0	0	0	0	0	0	0	0	0	0	0	0	0	0	0	0	0	0	0	0	0	0	0	0	0	0
63c832b825f28f472641ae77ed46335ab0053bd3	#N/A	Metazoa	0.82	unclassified_Metazoa	0.21	unclassified_Metazoa	0.21	unclassified_Metazoa	0.21	unclassified_Metazoa	0.21	unclassified_Metazoa	0.21	unclassified_Metazoa_sp	0.21	0	0	0	0	0	0	0	0	0	0	0	0	0	0	0	0	0	0	0	0	0	0	0	0	0	0	1	0	0	0	0	0	0	0
793bacb7e5e63160a49aba25b0295174c1cd870e	#N/A	Metazoa	0.89	unclassified_Metazoa	0.69	unclassified_Metazoa	0.69	unclassified_Metazoa	0.39	unclassified_Metazoa	0.21	unclassified_Metazoa	0.21	unclassified_Metazoa_sp	0.21	0	0	0	0	0	0	0	0	0	0	0	0	0	0	0	1	0	0	0	0	0	0	0	0	0	0	0	0	0	0	0	0	0	0
e3ff9d5ffe5a00ad3577c3164f0d39ed07369b37	#N/A	Metazoa	0.99	unclassified_Metazoa	0.74	unclassified_Metazoa	0.74	unclassified_Metazoa	0.51	unclassified_Metazoa	0.28	unclassified_Metazoa	0.21	unclassified_Metazoa_sp	0.21	0	0	0	0	0	0	0	0	0	0	0	0	0	0	0	0	0	0	0	0	0	0	0	0	0	0	0	0	0	0	0	0	0	0
5bf27abdf5386f34358531c83898e398e4ee0eb8	#N/A	Metazoa	0.83	unclassified_Metazoa	0.25	unclassified_Metazoa	0.22	unclassified_Metazoa	0.21	unclassified_Metazoa	0.21	unclassified_Metazoa	0.21	unclassified_Metazoa_sp	0.21	0	0	0	0	0	0	0	0	0	0	0	0	0	0	0	0	0	0	0	0	0	0	0	0	0	0	0	0	0	0	0	0	0	0
2cee8f74b6d0c64f5c4374d93c06f9c72a9355ce	#N/A	Metazoa	0.81	unclassified_Metazoa	0.21	unclassified_Metazoa	0.21	unclassified_Metazoa	0.21	unclassified_Metazoa	0.21	unclassified_Metazoa	0.21	unclassified_Metazoa_sp	0.21	0	0	0	0	0	0	0	0	0	2	0	0	0	0	0	0	0	0	0	0	0	0	0	0	0	0	0	0	0	0	0	0	0	0
992a35ba4dbc2663b51af5a08e22ec1ec5103009	#N/A	Metazoa	0.91	unclassified_Metazoa	0.33	unclassified_Metazoa	0.33	unclassified_Metazoa	0.33	unclassified_Metazoa	0.21	unclassified_Metazoa	0.21	unclassified_Metazoa_sp	0.2	0	0	0	0	0	0	0	1	0	0	0	0	0	0	0	0	0	0	0	0	0	0	0	0	0	0	0	0	0	0	0	0	0	0
bb01541dc6721707082c3dac9649e8ce508de5f7	#N/A	Metazoa	0.9	unclassified_Metazoa	0.51	unclassified_Metazoa	0.51	unclassified_Metazoa	0.33	unclassified_Metazoa	0.26	unclassified_Metazoa	0.21	unclassified_Metazoa_sp	0.2	0	0	0	0	0	1	0	0	0	0	0	0	0	0	0	0	0	0	0	0	0	0	0	0	0	0	0	0	0	0	0	0	0	0
372590b34fac0f7968eaf22fc2f0267be68abf2a	#N/A	Metazoa	0.94	unclassified_Metazoa	0.77	unclassified_Metazoa	0.77	unclassified_Metazoa	0.43	unclassified_Metazoa	0.29	unclassified_Metazoa	0.21	unclassified_Metazoa_sp	0.09	0	0	0	0	0	1	0	0	0	0	0	0	0	0	0	0	0	0	0	0	0	0	0	0	0	0	0	0	0	0	0	0	0	0
5fca339f6552023026af11534613e32358a33c61	#N/A	Metazoa	0.87	unclassified_Metazoa	0.75	unclassified_Metazoa	0.75	unclassified_Metazoa	0.63	unclassified_Metazoa	0.37	unclassified_Metazoa	0.21	unclassified_Metazoa_sp	0.06	0	0	0	1	0	0	0	0	0	0	0	0	0	0	0	0	0	0	0	0	0	0	0	0	0	0	0	0	0	0	0	0	0	0
b95edc963c23fd6d2ead3bb4c61c813ed2064f22	#N/A	Metazoa	0.89	unclassified_Metazoa	0.46	unclassified_Metazoa	0.46	unclassified_Metazoa	0.33	unclassified_Metazoa	0.31	unclassified_Metazoa	0.21	unclassified_Metazoa_sp	0.05	0	0	0	0	0	0	0	0	0	0	0	0	0	0	0	0	0	0	0	0	0	0	0	0	0	0	0	0	0	0	0	0	0	0
0b42ba34d10b48c8a493addb70a390e9c0cddae9	#N/A	Metazoa	0.83	unclassified_Metazoa	0.2	unclassified_Metazoa	0.2	unclassified_Metazoa	0.2	unclassified_Metazoa	0.2	unclassified_Metazoa	0.2	unclassified_Metazoa_sp	0.2	0	0	0	0	0	0	0	0	0	0	0	0	0	0	0	0	0	0	0	0	0	0	0	0	0	0	0	0	0	0	1	0	0	0
2c4d1a4534c5bf5b720f88efc211f8026fb0ced1	#N/A	Metazoa	0.83	unclassified_Metazoa	0.2	unclassified_Metazoa	0.2	unclassified_Metazoa	0.2	unclassified_Metazoa	0.2	unclassified_Metazoa	0.2	unclassified_Metazoa_sp	0.2	0	0	0	0	0	0	0	1	0	0	0	0	0	0	0	0	0	0	0	0	0	0	0	0	0	0	0	0	0	0	0	0	0	0
4f6b220103999a770474751c72147654f23f92ab	#N/A	Metazoa	0.83	unclassified_Metazoa	0.21	unclassified_Metazoa	0.21	unclassified_Metazoa	0.2	unclassified_Metazoa	0.2	unclassified_Metazoa	0.2	unclassified_Metazoa_sp	0.2	0	0	0	0	0	0	0	0	0	1	0	0	0	0	0	0	0	0	0	0	0	0	0	0	0	0	0	0	0	0	0	0	0	0
5b7799b97f49709a008836b0fa257906bfc1ee19	#N/A	Metazoa	0.82	unclassified_Metazoa	0.2	unclassified_Metazoa	0.2	unclassified_Metazoa	0.2	unclassified_Metazoa	0.2	unclassified_Metazoa	0.2	unclassified_Metazoa_sp	0.2	0	0	0	0	0	0	0	0	0	0	0	0	0	0	0	0	0	0	0	0	0	0	0	0	0	0	0	0	0	0	0	0	0	0
a8d5652611768b0823396c769420e1c63042f250	#N/A	Metazoa	0.82	unclassified_Metazoa	0.2	unclassified_Metazoa	0.2	unclassified_Metazoa	0.2	unclassified_Metazoa	0.2	unclassified_Metazoa	0.2	unclassified_Metazoa_sp	0.2	0	0	0	0	0	0	0	0	0	0	0	0	0	0	0	0	0	0	0	0	0	0	0	0	0	0	0	0	0	0	1	0	0	0
b56c89be9c237175f3766a44c8cf1b10e7c2a762	#N/A	Metazoa	0.85	unclassified_Metazoa	0.2	unclassified_Metazoa	0.2	unclassified_Metazoa	0.2	unclassified_Metazoa	0.2	unclassified_Metazoa	0.2	unclassified_Metazoa_sp	0.2	0	0	0	0	0	0	0	0	0	0	0	0	0	0	0	0	0	0	0	0	0	0	0	0	0	0	0	0	0	0	0	0	0	0
dcf2a07b13b32cc412d3cc58f30517328dbcdd4d	#N/A	Metazoa	0.84	unclassified_Metazoa	0.21	unclassified_Metazoa	0.2	unclassified_Metazoa	0.2	unclassified_Metazoa	0.2	unclassified_Metazoa	0.2	unclassified_Metazoa_sp	0.2	0	0	0	0	0	0	0	0	1	0	0	0	0	0	0	0	0	0	0	0	0	0	0	0	0	0	0	0	0	0	0	0	0	0
e22457c39d7f7ec0e193648ee26ba637e5333e11	#N/A	Metazoa	0.84	unclassified_Metazoa	0.31	unclassified_Metazoa	0.23	unclassified_Metazoa	0.2	unclassified_Metazoa	0.2	unclassified_Metazoa	0.2	unclassified_Metazoa_sp	0.2	0	0	0	0	0	0	0	0	0	0	0	0	0	0	0	0	0	0	0	0	0	0	0	0	0	0	0	0	0	0	0	0	0	0
ec5ba76f6b8094643ca6db6895863f4cc19030a8	#N/A	Metazoa	0.84	unclassified_Metazoa	0.2	unclassified_Metazoa	0.2	unclassified_Metazoa	0.2	unclassified_Metazoa	0.2	unclassified_Metazoa	0.2	unclassified_Metazoa_sp	0.2	0	0	0	0	0	0	0	0	0	0	0	0	0	0	0	0	0	0	0	0	0	0	0	0	0	0	0	0	0	0	0	0	0	0
ed972b3b4fc9d469ea38353530f26a845955fbb5	#N/A	Metazoa	0.99	unclassified_Metazoa	0.35	unclassified_Metazoa	0.35	unclassified_Metazoa	0.34	unclassified_Metazoa	0.28	unclassified_Metazoa	0.2	unclassified_Metazoa_sp	0.2	0	0	1	0	0	0	0	0	0	0	0	0	0	0	0	0	0	0	0	0	0	0	0	0	0	0	0	0	0	0	0	0	0	0
fee17b00f3cae441ab2a9df0fad12f87d89c6e69	#N/A	Metazoa	0.85	unclassified_Metazoa	0.2	unclassified_Metazoa	0.2	unclassified_Metazoa	0.2	unclassified_Metazoa	0.2	unclassified_Metazoa	0.2	unclassified_Metazoa_sp	0.2	0	0	0	0	0	0	0	0	0	0	0	0	0	0	1	0	0	0	0	0	0	0	0	0	0	0	0	0	0	0	0	0	0	0
5a58b3eb4cf47c39b0c10f6518e8b56c5cfe02fe	#N/A	Metazoa	0.84	unclassified_Metazoa	0.2	unclassified_Metazoa	0.2	unclassified_Metazoa	0.2	unclassified_Metazoa	0.2	unclassified_Metazoa	0.2	unclassified_Metazoa_sp	0.2	0	0	0	0	0	0	0	0	0	2	0	0	0	0	0	0	0	0	0	0	0	0	0	0	0	0	0	0	0	0	0	0	0	0
e237d27220d984f91389aea0eebc17a67f9f5932	#N/A	Metazoa	0.84	unclassified_Metazoa	0.21	unclassified_Metazoa	0.21	unclassified_Metazoa	0.2	unclassified_Metazoa	0.2	unclassified_Metazoa	0.2	unclassified_Metazoa_sp	0.2	0	0	0	0	0	0	0	0	0	0	0	0	0	0	0	0	0	0	0	0	0	0	0	0	0	0	0	0	0	0	0	0	0	0
0e2d62e6526060ec87ca046f5ac34210053074ef	#N/A	Metazoa	0.85	unclassified_Metazoa	0.3	unclassified_Metazoa	0.3	unclassified_Metazoa	0.2	unclassified_Metazoa	0.2	unclassified_Metazoa	0.2	unclassified_Metazoa_sp	0.2	0	0	0	0	0	0	0	1	0	0	0	0	0	0	0	0	0	0	0	0	0	0	0	0	0	0	0	0	0	0	0	0	0	1
bf3947d8e9b117bd0940f47180b5e562ddecafa8	#N/A	Metazoa	0.83	unclassified_Metazoa	0.2	unclassified_Metazoa	0.2	unclassified_Metazoa	0.2	unclassified_Metazoa	0.2	unclassified_Metazoa	0.2	unclassified_Metazoa_sp	0.2	0	0	0	0	0	0	0	0	0	0	0	0	0	0	0	0	0	0	0	0	0	0	0	0	0	0	0	0	0	0	0	0	0	0
045f0578b5236e0d70c42e03cd8f343596f1eedb	#N/A	Metazoa	0.9	unclassified_Metazoa	0.2	unclassified_Metazoa	0.2	unclassified_Metazoa	0.2	unclassified_Metazoa	0.2	unclassified_Metazoa	0.2	unclassified_Metazoa_sp	0.2	1	0	0	0	2	0	0	0	0	0	0	0	0	0	0	0	0	0	0	0	0	0	0	0	0	0	0	0	0	1	0	0	0	0
d5a8d85795aebb619cc2d0262c93a7fda763b912	#N/A	Metazoa	0.89	unclassified_Metazoa	0.22	unclassified_Metazoa	0.2	unclassified_Metazoa	0.2	unclassified_Metazoa	0.2	unclassified_Metazoa	0.2	unclassified_Metazoa_sp	0.2	0	0	0	0	0	0	0	0	0	1	0	0	0	0	0	0	0	0	0	0	0	0	0	0	0	0	0	0	0	0	0	0	0	0
ea824661e49176a32d71a1e45041e55796944f0b	#N/A	Metazoa	0.94	unclassified_Metazoa	0.62	unclassified_Metazoa	0.62	unclassified_Metazoa	0.21	unclassified_Metazoa	0.21	unclassified_Metazoa	0.2	unclassified_Metazoa_sp	0.16	0	0	0	0	0	0	0	0	0	0	0	0	0	0	0	0	0	0	0	0	0	0	0	0	0	0	0	0	0	0	0	0	0	0
fb44a6fb3a99106c17153f52301c68b9aed41708	#N/A	Metazoa	0.99	unclassified_Metazoa	0.6	unclassified_Metazoa	0.6	unclassified_Metazoa	0.46	unclassified_Metazoa	0.2	unclassified_Metazoa	0.2	unclassified_Metazoa_sp	0.09	0	0	0	0	0	0	0	0	0	0	0	0	0	0	0	0	0	0	0	0	0	0	0	0	0	0	0	0	0	0	1	0	0	0
d606afc25a141610225a7c6ede3297a535217e47	#N/A	Metazoa	0.99	unclassified_Metazoa	0.64	unclassified_Metazoa	0.64	unclassified_Metazoa	0.61	unclassified_Metazoa	0.21	unclassified_Metazoa	0.2	unclassified_Metazoa_sp	0.09	0	0	0	0	0	0	0	0	0	0	0	0	0	0	0	1	0	0	0	0	0	0	0	0	0	0	0	0	0	0	0	0	0	0
10cb9e764aea410e9a3fe5a5d85cbdc9bbda4b8e	#N/A	Metazoa	0.81	unclassified_Metazoa	0.21	unclassified_Metazoa	0.2	unclassified_Metazoa	0.19	unclassified_Metazoa	0.19	unclassified_Metazoa	0.19	unclassified_Metazoa_sp	0.19	0	0	0	0	0	0	0	0	0	0	0	0	0	0	0	0	0	0	0	0	0	0	0	0	0	0	0	0	0	0	1	0	0	0
1118d4b9db7316206f280625515a5505d86da4f9	#N/A	Metazoa	0.84	unclassified_Metazoa	0.19	unclassified_Metazoa	0.19	unclassified_Metazoa	0.19	unclassified_Metazoa	0.19	unclassified_Metazoa	0.19	unclassified_Metazoa_sp	0.19	0	0	0	0	0	0	0	0	0	0	0	0	0	0	0	0	0	0	0	0	0	0	0	0	0	0	0	0	0	0	0	0	0	0
19be795bccb49a53bbf208282ab2df2aa6bf493a	#N/A	Metazoa	0.86	unclassified_Metazoa	0.19	unclassified_Metazoa	0.19	unclassified_Metazoa	0.19	unclassified_Metazoa	0.19	unclassified_Metazoa	0.19	unclassified_Metazoa_sp	0.19	0	0	0	0	0	0	0	0	0	0	0	0	0	0	0	0	0	0	0	0	0	0	0	1	0	0	0	0	0	0	0	0	0	0
302db0a5a88cc4d7c4621dcf2f8d0d0d37982b94	#N/A	Metazoa	0.81	unclassified_Metazoa	0.19	unclassified_Metazoa	0.19	unclassified_Metazoa	0.19	unclassified_Metazoa	0.19	unclassified_Metazoa	0.19	unclassified_Metazoa_sp	0.19	0	0	0	0	0	0	0	0	0	0	0	0	0	0	0	0	0	0	0	0	0	0	0	0	0	0	0	0	0	0	0	0	0	0
39cf344d103a8d227e08551246e6659b0c58167d	#N/A	Metazoa	0.99	unclassified_Metazoa	0.77	unclassified_Metazoa	0.27	unclassified_Metazoa	0.19	unclassified_Metazoa	0.19	unclassified_Metazoa	0.19	unclassified_Metazoa_sp	0.19	0	0	0	0	0	0	0	0	0	0	0	0	0	0	0	0	0	0	0	0	0	0	0	0	0	0	0	0	0	0	0	0	0	0
86eabe7c3524b1f3e77c408618ddeeac21dc35a2	#N/A	Metazoa	0.86	unclassified_Metazoa	0.47	unclassified_Metazoa	0.46	unclassified_Metazoa	0.26	unclassified_Metazoa	0.19	unclassified_Metazoa	0.19	unclassified_Metazoa_sp	0.19	0	0	0	0	0	0	0	0	0	0	0	0	0	0	0	0	0	0	0	0	0	0	0	0	0	0	0	0	0	0	0	0	0	0
98b2ea0ea87667f516541e47be32caf8586395c5	#N/A	Metazoa	0.87	unclassified_Metazoa	0.26	unclassified_Metazoa	0.24	unclassified_Metazoa	0.19	unclassified_Metazoa	0.19	unclassified_Metazoa	0.19	unclassified_Metazoa_sp	0.19	0	0	0	0	0	0	0	0	1	0	0	0	0	0	0	0	0	0	0	0	0	0	0	0	0	0	0	0	0	0	0	0	0	0
ac3317506a05605075f441f294c2b6a61dd6a8c6	#N/A	Metazoa	0.87	unclassified_Metazoa	0.23	unclassified_Metazoa	0.23	unclassified_Metazoa	0.21	unclassified_Metazoa	0.19	unclassified_Metazoa	0.19	unclassified_Metazoa_sp	0.19	0	0	0	0	0	0	0	0	0	0	0	0	0	1	0	0	0	0	0	0	0	0	0	0	0	0	0	0	0	0	0	0	0	0
cec81a4e20bed7b80fa009cb32e29f26c0f06fab	#N/A	Metazoa	0.82	unclassified_Metazoa	0.21	unclassified_Metazoa	0.19	unclassified_Metazoa	0.19	unclassified_Metazoa	0.19	unclassified_Metazoa	0.19	unclassified_Metazoa_sp	0.19	0	0	0	0	0	0	0	0	0	0	0	0	0	0	0	0	0	0	0	0	0	0	0	0	0	0	0	0	0	0	0	1	0	0
f18ca0e1ca7e0d38911d993a1039458c9d8f6154	#N/A	Metazoa	0.81	unclassified_Metazoa	0.26	unclassified_Metazoa	0.25	unclassified_Metazoa	0.2	unclassified_Metazoa	0.2	unclassified_Metazoa	0.19	unclassified_Metazoa_sp	0.19	0	0	0	0	0	0	0	0	0	0	0	0	0	0	0	0	0	0	0	0	0	0	0	0	0	0	0	0	0	0	0	0	0	0
f55b293ee5c49b54c9d7ef5730656d1cd2664c47	#N/A	Metazoa	0.82	unclassified_Metazoa	0.25	unclassified_Metazoa	0.24	unclassified_Metazoa	0.19	unclassified_Metazoa	0.19	unclassified_Metazoa	0.19	unclassified_Metazoa_sp	0.19	0	0	0	0	0	0	0	0	0	0	0	0	0	0	0	0	0	0	0	0	0	0	0	0	0	1	0	0	0	0	0	0	0	0
128d91bf533a47f7b7242fcf3662950697e80f9d	#N/A	Metazoa	0.82	unclassified_Metazoa	0.19	unclassified_Metazoa	0.19	unclassified_Metazoa	0.19	unclassified_Metazoa	0.19	unclassified_Metazoa	0.19	unclassified_Metazoa_sp	0.19	0	0	0	0	0	0	1	0	0	0	0	0	0	0	0	0	0	0	0	0	0	0	0	0	0	0	0	0	0	0	0	0	0	0
e0b88901abebefede3a6dc6d444b4628a8852982	#N/A	Metazoa	0.8	unclassified_Metazoa	0.28	unclassified_Metazoa	0.25	unclassified_Metazoa	0.23	unclassified_Metazoa	0.19	unclassified_Metazoa	0.19	unclassified_Metazoa_sp	0.19	0	0	0	0	0	0	0	0	0	0	0	0	0	0	0	0	0	0	0	0	0	0	0	0	0	0	0	0	0	0	0	0	0	0
2da32b9c9c2a212bf9764c17277c885569c17b44	#N/A	Metazoa	0.82	unclassified_Metazoa	0.22	unclassified_Metazoa	0.2	unclassified_Metazoa	0.19	unclassified_Metazoa	0.19	unclassified_Metazoa	0.19	unclassified_Metazoa_sp	0.19	0	0	0	0	0	0	0	0	0	0	0	0	0	0	0	0	0	0	0	1	0	0	0	0	0	0	0	0	0	0	0	0	0	0
013fb369e330d911c649a3b1a9fb529bdab9acae	#N/A	Metazoa	0.81	unclassified_Metazoa	0.46	unclassified_Metazoa	0.2	unclassified_Metazoa	0.2	unclassified_Metazoa	0.19	unclassified_Metazoa	0.19	unclassified_Metazoa_sp	0.19	0	0	0	0	0	0	0	0	0	0	0	0	0	0	0	0	0	0	0	0	0	0	0	0	0	0	0	0	0	0	0	0	0	0
aa3f06b792fc468c5a58930c6b0b0ed40211ed79	#N/A	Metazoa	0.86	unclassified_Metazoa	0.19	unclassified_Metazoa	0.19	unclassified_Metazoa	0.19	unclassified_Metazoa	0.19	unclassified_Metazoa	0.19	unclassified_Metazoa_sp	0.19	1	0	0	0	0	0	2	0	3	0	0	0	0	0	0	0	0	0	0	0	0	0	0	0	0	0	0	0	0	0	0	0	0	0
3a4e560599e905adae29e04cdcdad9e7f433f345	#N/A	Metazoa	0.94	unclassified_Metazoa	0.66	unclassified_Metazoa	0.66	unclassified_Metazoa	0.61	unclassified_Metazoa	0.26	unclassified_Metazoa	0.19	unclassified_Metazoa_sp	0.18	0	0	0	1	0	0	0	0	0	0	0	0	0	0	0	0	0	0	0	0	0	0	0	0	0	0	0	0	0	0	0	0	0	0
3a12d2a4ed9876cfd219675d02c98389de356a9e	#N/A	Metazoa	1	unclassified_Metazoa	0.51	unclassified_Metazoa	0.51	unclassified_Metazoa	0.43	unclassified_Metazoa	0.2	unclassified_Metazoa	0.19	unclassified_Metazoa_sp	0.08	0	0	0	0	0	0	0	0	0	0	0	0	0	0	0	0	0	0	0	0	0	0	0	0	0	0	0	0	0	0	0	0	0	0
e34428a5d16a99b85a0101a0822040f4219c0c6f	#N/A	Metazoa	0.93	unclassified_Metazoa	0.61	unclassified_Metazoa	0.61	unclassified_Metazoa	0.5	unclassified_Metazoa	0.19	unclassified_Metazoa	0.19	unclassified_Metazoa_sp	0.07	0	0	0	0	0	0	0	0	0	0	0	0	0	0	0	0	0	0	0	0	0	0	0	0	0	0	0	0	0	0	0	0	0	0
091a1b6a5631c2db73154863a7b09cb6ae72da29	#N/A	Metazoa	0.8	unclassified_Metazoa	0.18	unclassified_Metazoa	0.18	unclassified_Metazoa	0.18	unclassified_Metazoa	0.18	unclassified_Metazoa	0.18	unclassified_Metazoa_sp	0.18	0	0	0	0	0	0	0	0	0	0	0	0	0	0	0	0	0	0	0	0	0	0	0	0	0	0	0	0	0	0	0	0	0	0
974046e5be558d1c51114bdfa6986afe9ee02976	#N/A	Metazoa	0.86	unclassified_Metazoa	0.22	unclassified_Metazoa	0.2	unclassified_Metazoa	0.18	unclassified_Metazoa	0.18	unclassified_Metazoa	0.18	unclassified_Metazoa_sp	0.18	0	0	0	0	0	0	0	0	0	0	0	0	0	0	0	0	0	0	0	0	0	0	0	0	0	0	0	0	0	1	0	0	0	0
afe3d79040e81d738950382438a84415cd3c4683	#N/A	Metazoa	0.99	unclassified_Metazoa	0.77	unclassified_Metazoa	0.77	unclassified_Metazoa	0.41	unclassified_Metazoa	0.21	unclassified_Metazoa	0.18	unclassified_Metazoa_sp	0.18	0	0	0	0	0	0	0	0	0	0	0	0	0	0	0	0	0	0	0	0	0	0	0	0	0	0	0	0	0	0	1	0	0	0
bc3a9f6ed304b86b9338d0376974d50c71011af5	#N/A	Metazoa	0.81	unclassified_Metazoa	0.21	unclassified_Metazoa	0.18	unclassified_Metazoa	0.18	unclassified_Metazoa	0.18	unclassified_Metazoa	0.18	unclassified_Metazoa_sp	0.18	0	0	0	0	0	0	0	0	0	0	0	0	0	0	0	0	0	0	0	0	0	0	0	0	0	0	0	0	0	0	0	0	0	0
cc7ef6eacf8fddd8d35152acdccddd53a930a2b9	#N/A	Metazoa	0.8	unclassified_Metazoa	0.18	unclassified_Metazoa	0.18	unclassified_Metazoa	0.18	unclassified_Metazoa	0.18	unclassified_Metazoa	0.18	unclassified_Metazoa_sp	0.18	0	0	0	0	0	0	0	0	0	0	0	0	0	0	0	0	0	0	0	0	0	0	0	1	0	0	0	0	0	0	0	0	0	0
e2c86785b6f03a3c90d7dea0c42a2636d3f286f5	#N/A	Metazoa	0.88	unclassified_Metazoa	0.48	unclassified_Metazoa	0.48	unclassified_Metazoa	0.25	unclassified_Metazoa	0.22	unclassified_Metazoa	0.18	unclassified_Metazoa_sp	0.18	0	0	0	0	0	0	0	0	0	0	0	0	0	0	0	0	0	0	0	0	0	0	0	0	0	0	0	0	0	0	0	0	0	0
1facba64880145019ed3e25c5d5f3e8afe9b97c0	#N/A	Metazoa	0.82	unclassified_Metazoa	0.19	unclassified_Metazoa	0.19	unclassified_Metazoa	0.18	unclassified_Metazoa	0.18	unclassified_Metazoa	0.18	unclassified_Metazoa_sp	0.18	0	1	0	0	0	0	0	0	0	0	0	0	0	0	0	0	0	0	0	0	0	0	0	0	0	0	0	0	0	0	1	0	0	0
6e35178619b5051cd9269f905c62e6ef30f0d558	#N/A	Metazoa	0.82	unclassified_Metazoa	0.23	unclassified_Metazoa	0.21	unclassified_Metazoa	0.18	unclassified_Metazoa	0.18	unclassified_Metazoa	0.18	unclassified_Metazoa_sp	0.18	0	0	0	0	0	0	0	0	0	0	1	0	0	0	0	0	0	0	0	0	0	0	0	0	0	0	0	0	0	0	0	0	0	0
7058488f8bf9c2d283952a55b18ae9f66bb11da4	#N/A	Metazoa	0.86	unclassified_Metazoa	0.18	unclassified_Metazoa	0.18	unclassified_Metazoa	0.18	unclassified_Metazoa	0.18	unclassified_Metazoa	0.18	unclassified_Metazoa_sp	0.18	2	0	0	0	0	0	0	0	0	0	0	0	0	0	0	0	0	0	0	0	0	0	0	0	0	0	0	0	0	1	0	0	0	0
71a44f9c6f783268c350168cbdfe7ea69fb9a518	#N/A	Metazoa	0.8	unclassified_Metazoa	0.24	unclassified_Metazoa	0.22	unclassified_Metazoa	0.18	unclassified_Metazoa	0.18	unclassified_Metazoa	0.18	unclassified_Metazoa_sp	0.18	0	1	0	0	0	0	0	0	0	0	0	0	0	0	0	0	0	0	0	0	0	0	0	0	0	0	0	0	0	0	0	0	0	0
141889091371614ac4a434761a1acfb8e298c825	#N/A	Metazoa	0.84	unclassified_Metazoa	0.49	unclassified_Metazoa	0.23	unclassified_Metazoa	0.19	unclassified_Metazoa	0.18	unclassified_Metazoa	0.18	unclassified_Metazoa_sp	0.18	0	0	0	0	0	0	0	0	0	0	0	0	0	0	0	0	0	0	0	0	0	0	0	0	0	0	0	0	0	0	0	0	0	0
85095ea64106cdfa57434f87426336e7e0a035aa	#N/A	Metazoa	1	unclassified_Metazoa	0.78	unclassified_Metazoa	0.78	unclassified_Metazoa	0.29	unclassified_Metazoa	0.18	unclassified_Metazoa	0.18	unclassified_Metazoa_sp	0.18	5	0	0	0	0	0	0	0	0	0	0	0	0	0	0	0	0	0	0	0	0	0	0	0	0	0	0	0	0	0	0	0	0	0
4801622d543cbf7f4fe146b8c3250f11b03e59e4	#N/A	Metazoa	1	unclassified_Metazoa	0.41	unclassified_Metazoa	0.41	unclassified_Metazoa	0.41	unclassified_Metazoa	0.26	unclassified_Metazoa	0.18	unclassified_Metazoa_sp	0.17	0	0	0	0	0	2	0	0	0	0	1	0	0	0	0	0	0	0	0	0	0	0	0	0	0	0	0	0	0	0	0	0	0	0
b492903e3f27211fad21240871766eb5eca8d064	#N/A	Metazoa	0.99	unclassified_Metazoa	0.54	unclassified_Metazoa	0.54	unclassified_Metazoa	0.54	unclassified_Metazoa	0.2	unclassified_Metazoa	0.18	unclassified_Metazoa_sp	0.14	0	0	0	0	0	0	0	1	0	0	0	0	0	0	0	0	0	0	0	0	0	0	0	0	0	0	0	0	0	0	0	0	0	0
[truncated: 645 more rows]
[truncated: 24 more columns]

## Sheet: legend
Table S2. PacBio dataset of Metazoan OTUs, including mite OTUs. The prefix “b” in the sample header indicates samples subjected to the 2 g DNA extraction treatment, while “s” denotes the 0.2 g DNA extraction treatment. The numbers following the prefix represent the site number (first digit) and the replicate number in that site along the transect (second digit). Column "*_BootS" denotes the RDP b…
