# Supplementary material for: DNA metabarcoding of mites from small soil samples: limited agreement with morphological identifications but improved results from long-read sequencing
Source: PeerJ. 2025 Oct 20;13:e20205. doi: 10.7717/peerj.20205 (PMC12548636; doi:10.7717/peerj.20205)
Supplement: Supplemental Information 3 [file peerj-13-20205-s003.xlsx]

## Sheet: Table S3
Order	Family	Genus	Species	site1_1	site1_2	site1_3	site1_4	site1_5	site1_6	site2_1	site2_2	site2_3	site2_4	site2_5	site3_1	site3_2	site3_3	site3_4	site3_5	site3_6
Sarcoptiformes	Achipteriidae	Achipteria	Achipteria_coleoptrata	0	0	0	0	3	0	0	0	0	0	0	0	0	0	0	0	0
Mesostigmata	Phytoseiidae	Amblyseius	Amblyseius_sp	0	0	0	0	0	1	0	0	0	0	0	0	0	0	0	0	0
Sarcoptiformes	Phthiracaridae	Atropacarus	Atropacarus_sp	0	0	0	0	0	1	0	0	1	0	0	2	2	6	1	0	4
Sarcoptiformes	Oppiidae	Berniniella	Berniniella_sp	0	0	0	0	0	0	0	0	0	0	0	0	0	1	0	0	0
Sarcoptiformes	Achipteriidae	Campachipteria	Campachipteria_bella	0	0	0	0	0	0	0	0	0	0	0	1	0	0	0	0	0
Sarcoptiformes	Carabodidae	Carabodes	Carabodes_femoralis	0	0	0	0	0	0	0	0	0	0	0	0	1	0	0	0	1
Sarcoptiformes	Cepheusidae	Cepheus	Cepheus_latus	0	0	0	0	0	0	0	0	0	0	0	0	1	0	0	0	0
Sarcoptiformes	Ceratozetoidae	Ceratozetes	Ceratozetes_parvulus	0	0	0	0	0	0	0	0	3	0	0	0	0	0	0	0	0
Sarcoptiformes	Chamobatidae	Chamobates	Chamobates_cuspidatus	0	0	0	0	0	0	4	4	5	4	1	0	0	0	0	0	0
Sarcoptiformes	Chamobatidae	Chamobates	Chamobates_pusillus	0	0	0	0	0	0	1	1	0	0	0	0	0	0	0	0	0
Sarcoptiformes	Chamobatidae	Chamobates	Chamobates_voigtsi	0	0	0	0	0	0	0	0	0	0	0	1	0	0	0	0	0
Sarcoptiformes	Damaeidae	Damaeus	Damaeus_riparius	0	0	0	0	0	0	0	0	0	0	0	0	0	0	0	1	0
Sarcoptiformes	Ceratozetidae	Diapterobates	Diapterobates_humeralis	0	0	0	0	1	0	1	0	0	0	0	0	0	0	0	0	0
Mesostigmata	Uropodina	Discourella	Discourella_modesta	0	0	0	0	0	1	0	1	1	1	0	0	0	0	0	0	0
Sarcoptiformes	Oppiidae	Disorrhina	Disorrhina_ornata	0	0	0	0	0	0	0	0	0	0	0	0	1	0	0	0	1
Mesostigmata	Epicriidae	Epicrius	Epicrius_sp	0	0	0	0	0	0	0	0	0	0	0	0	0	1	0	0	0
Mesostigmata	Parasitidae	Eugamasus	Eugamasus_cavernicolus	0	0	1	0	0	0	0	0	0	0	0	0	0	0	0	0	0
Sarcoptiformes	Euzetidae	Euzetes	Euzetes_globulus	0	1	2	2	1	2	0	0	0	0	0	0	0	3	0	2	0
Mesostigmata	Eviphididae	Eviphis	Eviphis_ostrinus	1	0	0	0	0	1	3	0	0	0	0	1	0	0	0	0	0
Sarcoptiformes	Damaeolidae	Fosseremaeus	Fosseremaeus_laciniatus	0	0	0	0	0	0	0	0	0	0	0	0	3	0	1	4	5
Sarcoptiformes	Galumnidae	Galumna	Galumna_lanceata	0	0	5	0	0	0	2	0	0	0	0	0	1	0	1	2	0
Mesostigmata	Macrochelidae	Geholaspis	Geholaspis_longispinosus	0	0	0	0	1	1	1	1	0	0	0	0	0	0	0	0	0
Mesostigmata	Macrochelidae	Geholaspis	Geholaspis_mandibularis	0	0	0	0	0	0	0	0	1	0	0	0	0	0	0	0	0
Sarcoptiformes	Gustaviidae	Gustavia	Gustavia_microcephala	0	0	0	0	0	0	0	0	0	0	0	0	0	0	1	1	0
Sarcoptiformes	Scheloribatidae	Hemileius	Hemileius_initialis	4	0	7	1	2	1	0	0	0	0	0	0	1	1	1	1	0
Sarcoptiformes	Crotoniidae	Heminothrus	Heminothrus_targionii	0	0	0	0	0	0	0	0	0	0	0	1	5	1	2	3	3
Sarcoptiformes	Hermanniellidae	Hermanniella	Hermanniella_punctulata	0	0	0	0	0	0	0	0	0	0	0	6	4	1	3	2	3
Sarcoptiformes	Phthiracaridae	Hoplophthiracarus	Hoplophthiracarus_illinoisensis	0	0	0	0	0	0	0	0	3	0	0	0	0	0	0	0	0
Sarcoptiformes	Hypochthoniidae	Hypochthonius	Hypochthonius_luteus	0	0	0	0	0	0	0	0	2	0	2	0	0	0	0	0	0
Sarcoptiformes	Hypochthoniidae	Hypochthonius	Hypochthonius_rufulus	0	0	0	0	0	0	0	6	0	0	0	0	3	3	1	1	0
Sarcoptiformes	Eniochthoniidae	Hypochtoniella	Hypochtoniella_minutissima	0	0	0	0	0	0	0	0	0	0	0	7	6	7	6	5	6
Trombidiformes	Scutacaridae	Imparipes	Imparipes_sp	0	0	0	0	0	0	0	0	0	0	0	0	0	0	0	0	1
Mesostigmata	Parasitidae	Leptogamasus	Leptogamasus_succineus	0	0	0	0	0	0	0	0	0	0	0	0	0	0	0	0	2
Mesostigmata	Parasitidae	Leptogamasus	Leptogamasus_suecicus	0	0	0	0	1	1	0	0	0	0	0	0	1	0	4	1	1
Sarcoptiformes	Brachychthoniidae	Liochthonius	Liochthonius_lapponicus	0	0	0	0	0	0	0	0	2	0	0	0	1	0	0	0	0
Sarcoptiformes	Brachychthoniidae	Liochthonius	Liochthonius_strenzkei	0	0	0	0	0	0	0	0	0	1	0	0	0	0	0	0	0
Mesostigmata	Macrochelidae	Macrocheles	Macrocheles_montanus	0	0	0	0	0	1	0	0	0	0	0	0	0	0	0	0	0
Sarcoptiformes	Malaconothridae	Malaconothrus	Malaconothrus_monodactylus	0	0	0	0	0	0	0	0	0	0	0	1	0	0	0	0	0
Sarcoptiformes	Oppiidae	Microppia	Microppia_minus	0	0	0	0	0	0	0	0	1	0	0	0	0	0	0	0	0
Sarcoptiformes	Punctoribatidae	Minunthozetes	Minunthozetes_sp	3	1	1	1	0	0	0	0	0	0	0	0	0	2	0	0	0
Sarcoptiformes	Oppiidae	Multioppia	Multioppia_glabra	0	0	0	0	0	0	0	0	0	0	0	0	0	2	0	0	1
Sarcoptiformes	Nanhermanniidae	Nanhermannia	Nanhermannia_nana	0	0	0	0	0	0	0	0	0	0	0	1	0	1	0	0	0
Sarcoptiformes	Nothridae	Nothrus	Nothrus_palustris	0	0	0	0	1	0	0	0	0	1	0	1	1	0	0	0	0
Trombidiformes	Bdellidae	Odontoscirus	Odontoscirus_sp	0	0	0	0	0	0	1	0	0	0	0	0	0	0	0	0	0
Mesostigmata	Parasitidae	Ololaelaps	Ololaelaps_placentula	0	0	0	0	0	0	0	0	0	0	0	0	1	0	0	0	0
Sarcoptiformes	Oppiidae	Oppiella	Oppiella_nova	4	3	4	0	2	1	0	2	4	2	5	1	0	5	6	1	0
Sarcoptiformes	Oribatulidae	Oribatula	Oribatula_pallida	0	0	0	0	0	0	0	0	1	0	0	0	0	0	0	0	0
Sarcoptiformes	Achipteriidae	Parachipteria	Parachipteria_sp	0	0	0	0	0	0	0	0	0	0	0	1	1	0	1	0	0
Mesostigmata	Parasitidae	Paragamasus	Paragamasus_jugincola	0	0	0	0	0	1	0	0	0	0	0	0	0	0	0	0	0
Mesostigmata	Parasitidae	Paragamasus	Paragamasus_lapponicus	0	0	0	0	0	1	0	0	0	0	0	0	0	0	0	0	0
Mesostigmata	Parasitidae	Paragamasus	Paragamasus_misellus	0	0	0	0	0	0	1	0	0	0	0	4	3	6	0	2	3
Mesostigmata	Parasitidae	Paragamasus	Paragamasus_runciger	0	0	0	0	0	1	0	0	0	0	0	0	0	0	0	0	0
Mesostigmata	Parasitidae	Pergamasus	Pergamasus_norvegicus	0	0	0	0	0	0	0	1	0	0	0	0	0	0	0	0	0
Sarcoptiformes	Phthiracaridae	Phthiracarus	Phthiracarus_sp	0	0	1	0	0	0	0	0	0	0	0	4	2	3	0	0	3
Sarcoptiformes	Crotoniidae	Platynothrus	Platynothrus_peltifer	0	0	0	0	1	0	0	0	0	0	0	0	0	0	0	0	0
Sarcoptiformes	Damaeidae	Porobelba	Porobelba_spinosa	0	0	0	0	0	0	0	0	0	0	0	3	0	0	0	0	0
Mesostigmata	Zerconidae	Prozercon	Prozercon_kochi	0	0	0	0	0	0	0	0	0	0	0	2	0	0	0	0	2
Sarcoptiformes	Punctoribatidae	Punctoribates	Punctoribates_punctum	0	5	5	0	5	1	0	0	0	0	0	0	0	0	0	0	0
Sarcoptiformes	Quadroppiidae	Quadroppia	Quadroppia_hammerae	0	0	0	0	0	0	0	0	1	0	0	0	0	0	0	0	0
Sarcoptiformes	Quadroppiidae	Quadroppia	Quadroppia_quatricarinata	0	0	0	0	0	0	0	0	0	0	0	2	0	0	0	1	2
Sarcoptiformes	Oppiidae	Ramusella	Ramusella_elliptica	2	1	0	1	6	0	5	4	1	4	0	0	0	0	0	0	0
Sarcoptiformes	Scheloribatidae	Scheloribates	Scheloribates_laevigatus	0	1	0	1	1	4	0	0	0	0	0	0	1	0	2	0	2
Trombidiformes	Scutacaridae	Scutacarus	Scutacarus_sp	0	0	1	0	0	2	0	1	2	0	0	0	0	1	0	0	1
Sarcoptiformes	Brachychthoniidae	Sellnickochthonius	Sellnickochthonius_immaculatus	0	0	0	0	0	0	0	0	1	0	0	0	0	0	0	0	0
Sarcoptiformes	Suctobelbidae	Suctobelbelba	Suctobelbelba_reticulata	0	0	0	0	0	0	0	0	0	0	0	2	0	0	0	0	0
Sarcoptiformes	Suctobelbidae	Suctobelbella	Suctobelbella_acutidens	0	0	0	0	0	0	0	1	0	0	0	0	0	0	0	0	1
Sarcoptiformes	Suctobelbidae	Suctobelbella	Suctobelbella_arcana	0	0	0	0	0	1	1	1	5	4	1	0	0	0	0	0	0
Sarcoptiformes	Suctobelbidae	Suctobelbella	Suctobelbella_falcata	0	0	0	0	0	0	0	0	0	0	0	0	1	0	0	0	0
Sarcoptiformes	Suctobelbidae	Suctobelbella	Suctobelbella_hamata	0	0	0	0	0	0	0	0	0	0	0	0	0	1	0	0	0
Sarcoptiformes	Suctobelbidae	Suctobelbella	Suctobelbella_sarekensis	2	0	0	0	0	1	2	0	0	0	1	1	0	0	0	2	0
Sarcoptiformes	Suctobelbidae	Suctobelbella	Suctobelbella_subcornigera	0	0	0	0	1	0	1	0	0	0	0	1	0	2	1	1	0
Sarcoptiformes	Suctobelbidae	Suctobelbella	Suctobelbella_subtrigona	0	0	0	0	0	0	0	0	0	0	0	0	1	0	0	0	0
Sarcoptiformes	Tectocepheidae	Tectocepheus	Tectocepheus_minor	0	0	0	0	0	0	0	0	0	0	0	0	0	3	4	1	3
Sarcoptiformes	Tectocepheidae	Tectocepheus	Tectocepheus_sarekensis	0	0	0	0	4	0	3	5	5	6	1	1	2	0	0	3	3
Mesostigmata	Trachytidae	Trachytes	Trachytes_aegrota	1	0	0	0	0	0	0	0	0	0	0	1	1	0	0	0	2
Mesostigmata	Trachytidae	Trachytes	Trachytes_pauperior	0	0	0	0	0	0	0	0	0	0	0	4	2	5	0	1	0
Sarcoptiformes	Phthiracaridae	Tropacarus	Tropacarus_carinatus	0	0	0	0	0	0	0	0	0	0	0	2	2	1	3	0	1
Mesostigmata	Ascidae	unclassified_Ascidae	unclassified_Ascidae	0	0	0	0	0	0	2	0	1	0	0	1	0	1	0	2	0
unclassified_Sarcoptiformes	unclassified_Sarcoptiformes	unclassified_Sarcoptiformes	unclassified_Sarcoptiformes	0	0	0	0	0	0	1	0	0	0	0	1	2	6	0	1	0
Trombidiformes	Bdellidae	unclassified_Bdellidae	unclassified_Bdellidae	0	0	0	0	0	0	1	0	0	0	0	0	0	0	0	0	0
Sarcoptiformes	Brachychthoniidae	unclassified_Brachychthoniidae	unclassified_Brachychthoniidae	0	0	0	0	1	0	1	0	0	0	0	3	0	2	3	0	0
Sarcoptiformes	Ceratozetidae	unclassified_Ceratozetidae	unclassified_Ceratozetidae	0	0	0	0	0	0	0	0	0	0	0	0	0	1	0	0	0
Trombidiformes	Cocceupodidae	unclassified_Cocceupodidae	unclassified_Cocceupodidae	0	0	0	0	0	0	0	0	1	0	0	0	0	0	0	0	0
Sarcoptiformes	Crotoniidae	unclassified_Crotoniidae	unclassified_Crotoniidae	0	0	0	0	0	1	0	0	0	6	0	0	0	0	0	0	0
Sarcoptiformes	Damaeidae	unclassified_Damaeidae	unclassified_Damaeidae	0	0	0	0	0	0	0	0	0	0	0	1	0	2	0	0	0
Trombidiformes	Erythraeidae	unclassified_Erythraeidae	unclassified_Erythraeidae	0	0	0	0	0	0	0	1	0	0	0	0	0	0	0	0	0
Sarcoptiformes	Eulohmanniidae	unclassified_Eulohmanniidae	unclassified_Eulohmanniidae	0	0	0	0	0	0	0	0	0	0	0	0	0	1	1	0	0
Sarcoptiformes	Nothridae	unclassified_Nothridae	unclassified_Nothridae	0	0	0	0	0	0	0	0	0	0	0	1	0	0	0	3	1
Mesostigmata	Pachylaelapidae	unclassified_Pachylaelapidae	unclassified_Pachylaelapidae	0	0	0	0	0	0	0	0	0	0	0	1	1	0	0	0	1
Mesostigmata	Parasitidae	unclassified_Parasitidae	unclassified_Parasitidae	3	1	0	0	0	0	0	0	0	2	0	0	0	0	0	0	0
Trombidiformes	Pygmephoridae	unclassified_Pygmephoridae	unclassified_Pygmephoridae	0	0	0	0	0	1	5	0	0	0	0	0	0	0	0	0	0
Trombidiformes	Raphignathoidea	unclassified_Raphignathoidea	unclassified_Raphignathoidea	0	0	0	0	0	1	0	0	0	0	0	0	0	0	0	0	0
Trombidiformes	Rhagidiidae	unclassified_Rhagidiidae	unclassified_Rhagidiidae	0	0	0	0	0	1	0	0	0	0	0	1	0	0	0	0	0
Trombidiformes	Scutacaridae	unclassified_Scutacaridae	unclassified_Scutacaridae	0	0	0	0	0	0	0	0	0	1	1	0	2	0	2	0	0
Trombidiformes	Stigmaeidae	unclassified_Stigmaeidae	unclassified_Stigmaeidae	0	0	0	0	0	0	0	0	0	1	0	0	0	0	0	1	0
Trombidiformes	Tarsonemidae	unclassified_Tarsonemidae	unclassified_Tarsonemidae	0	0	0	0	1	0	1	0	0	1	0	0	0	0	0	0	0
Trombidiformes	Tetranychidae	unclassified_Tetranychidae	unclassified_Tetranychidae	0	0	0	0	0	0	1	0	0	0	0	0	1	0	0	0	0
Mesostigmata	Trachytidae	unclassified_Trachytidae	unclassified_Trachytidae	0	0	0	0	0	0	0	0	0	0	0	0	0	0	2	0	4
Trombidiformes	Tydeidae	unclassified_Tydeidae	unclassified_Tydeidae	0	0	0	0	1	0	0	0	0	0	0	0	0	0	0	0	0
Mesostigmata	Uropodina	unclassified_Uropodina	unclassified_Uropodina	0	0	0	0	0	0	0	0	0	0	0	0	1	0	1	0	0
Mesostigmata	Veigaiidae	unclassified_Veigaiidae	unclassified_Veigaiidae	0	0	0	0	0	5	0	0	0	0	0	0	1	1	0	1	1
Mesostigmata	Veigaiidae	Veigaia	Veigaia_cervus	0	0	1	0	0	0	0	0	0	0	0	0	0	0	0	0	0
Mesostigmata	Veigaiidae	Veigaia	Veigaia_kochi	0	0	0	0	0	0	0	1	0	0	0	0	0	0	0	0	0
Mesostigmata	Veigaiidae	Veigaia	Veigaia_nemorensis	0	0	0	0	2	0	1	0	2	0	1	1	0	3	0	0	1
Sarcoptiformes	Xenillidae	Xenillus	Xenillus_tegeocranus	0	0	0	0	0	0	2	0	0	0	0	0	0	0	1	0	0

## Sheet: legend
Table S3. Mites dataset obtained via extracting mites from soil samples followed by morphological identification
